# Supplementary material for: Identification of Potential Key Agents for Targeting RNA-Dependent RNA Polymerase of SARS-CoV-2 by Integrated Analysis and Virtual Drug Screening
Source: Front Genet. 2020 Nov 17;11:581668. doi: 10.3389/fgene.2020.581668 (PMC7705243; doi:10.3389/fgene.2020.581668)
Supplement: Supplementary Table 1 — List of Compounds selected from TTD and DrugBank. [file Table_1.XLSX]

## Sheet: Sheet1
Antiviral Agents Name/Drug Name	PubChem CID	Binding Energy (kcal/mol)	Drug Group	Actions	Disease/Target Organism	Curation/DataSource	Inhibition (%)	IC50 (nM)
Remdesivir	121304016	-8	Investigational	inhibitor	Zaire ebolavirus; SARS-CoV	DrugBank	NA	NA
Sofosbuvir (PSI-7977, GS-7977); Hepcvir; Hepcinat;	45375808	-7.8	Approved	Modulator	Virus infection; Hepatitis C virus infection	TTD	NA	NA
Rifamycin	6324616	-8.8	Approved	Modulator, Inhibitor	Infectious disease; Diarrhea; Hepatitis C virus infection; Head and neck cancer	TTD	NA	NA
Baloxavir marboxil	124081896	-9.7	Approved	Inhibitor	Virus infection; Influenza virus infection	TTD	NA	NA
Lurbinectedin	57327016	-11.1	Investigational	Inhibitor	leukaemia; Solid tumour/cancer;	TTD	NA	NA
Rifampin	6243627	-9.4	Approved	Inhibitor	Tuberculosis; Clostridium difficile associated diarrhea	TTD	NA	NA
Rifapentine	135659016	-8.9	Approved	Binder	Tuberculosis; Macular degeneration	TTD	NA	NA
(2S)-N-(2-chloro-4-nitrophenyl)-2-{[4-(dimethylamino)phenyl]formamido}-3-phenylpropanamide::Anilide Inhibitor 2a	11317290	-8.4	experimental	Inhibition	SARS-CoV	BindingDB	NA	60
(2S)-N-[(1S)-1-[(2-chloro-4-nitrophenyl)carbamoyl]-2-phenylethyl]-4-methyl-2-[(2S)-3-methyl-2-(thiophen-2-ylformamido)butanamido]pentanamide::Anilide Inhibitor 3h	11467858	-8.2	experimental	Inhibition	SARS-CoV	BindingDB	NA	5000
Anilide Inhibitor 3o::N-[(5-methylisoxazol-3-yl)carbonyl]-L-valyl-L-phenylalanyl-N-(2-chloro-4-nitrophenyl)-L-phenylalaninamide	85426836	-8.6	experimental	Inhibition	SARS-CoV	BindingDB	NA	7000
(2S)-N-[(1S)-1-{[(1S)-1-[(2-chloro-4-nitrophenyl)carbamoyl]-2-phenylethyl]carbamoyl}-2-phenylethyl]-3-methyl-2-(thiophen-2-ylformamido)butanamide	11227702	-8.9	experimental	Inhibition	SARS-CoV	BindingDB	NA	5000
(2S)-N-[(1S)-1-{[(1S,2S)-1-{[(1S)-1-[(2-chloro-4-nitrophenyl)carbamoyl]-2-phenylethyl]carbamoyl}-2-hydroxypropyl]carbamoyl}-2-phenylethyl]-3-methyl-2-[(5-methyl-1,2-oxazol-3-yl)formamido]butanamide	15959316	-9.3	experimental	Inhibition	SARS-CoV	BindingDB	NA	5000
Anilide Inhibitor 4k::N-[(benzyloxy)carbonyl]-L-valyl-L-phenylalanyl-L-threonyl-N-(2-chloro-4-nitrophenyl)-L-phenylalaninamide::benzyl N-[(1S)-1-{[(1S)-1-{[(1S,2S)-1-{[(1S)-1-[(2-chloro-4-nitrophenyl)carbamoyl]-2-phenylethyl]carbamoyl}-2-hydroxypropyl]carbamoyl}-2-phenylethyl]carbamoyl}-2-methylpropyl]carbamate	15959317	-8.8	experimental	Inhibition	SARS-CoV	BindingDB	NA	6000
(2S)-N,N'-bis[(1S)-1-[(2-chloro-4-nitrophenyl)carbamoyl]-2-phenylethyl]-2-hydroxybutanediamide::Anilide Inhibitor 5b::Bis-anilide	11491101	-9.5	experimental	Inhibition	SARS-CoV	BindingDB	NA	4000
dipeptidomimetic unsaturated ester 18b::ethyl (2E,4S)-4-({N-[(2E)-3-(4-nitrophenyl)prop-2-enoyl]-L-phenylalanyl}amino)-5-phenylpent-2-enoate::ethyl (2E,4S)-4-[(2S)-2-[(2E)-3-(4-nitrophenyl)prop-2-enamido]-3-phenylpropanamido]-5-phenylpent-2-enoate	15959303	-8.2	experimental	Inhibition	SARS-CoV	BindingDB	NA	5000
ethyl (2E,4S)-4-[(2S)-2-[(2E)-3-[4-(dimethylamino)phenyl]prop-2-enamido]-3-phenylpropanamido]-5-phenylpent-2-enoate::ethyl (2E,4S)-4-[(N-{(2E)-3-[4-(dimethylamino)phenyl]prop-2-enoyl}-L-phenylalanyl)amino]-5-phenylpent-2-enoate	11555658	-7.9	experimental	Inhibition	SARS-CoV	BindingDB	NA	1000
dipeptidomimetic unsaturated ester 18e::ethyl (2E,4S)-4-({N-[(2E)-3-(1,3-benzodioxol-5-yl)prop-2-enoyl]-L-phenylalanyl}amino)-5-phenylpent-2-enoate::ethyl (2E,4S)-4-[(2S)-2-[(2E)-3-(2H-1,3-benzodioxol-5-yl)prop-2-enamido]-3-phenylpropanamido]-5-phenylpent-2-enoate	23645527	-8.9	experimental	Inhibition	SARS-CoV	BindingDB	NA	7000
N-(3,5-dichlorophenyl)-2-{[4-(2-phenyl-1,3-thiazol-4-yl)pyrimidin-2-yl]sulfanyl}acetamide::pyrimidine-containing compound 1	2744814	-7.2	experimental	Inhibition	SARS-CoV	BindingDB	NA	3000
4-({4-[(2,3,3-trichloroprop-2-enoyl)oxy]benzene}sulfonyl)phenyl 2,3,3-trichloroprop-2-enoate::Compound 1 analog 4	2774892	-7.8	experimental	Inhibition	SARS-CoV	BindingDB	NA	900
5-[(4-chlorobenzene)sulfonyl]pyrimidine-2,4-diamine::Compound 1 analog 5	2819040	-7.3	experimental	Inhibition	SARS-CoV	BindingDB	NA	6000
5-[1-methyl-3-(trifluoromethyl)-1H-pyrazol-5-yl]-N-(3-methyl-4-nitro-1,2-oxazol-5-yl)thiophene-2-carboxamide::Compound 2 analog 16	3776668	-8	experimental	Inhibition	SARS-CoV	BindingDB	NA	5000
4-(3-Benzylamino-phenyl)-2,4-dioxo-butyric acid::CHEMBL367740::CHEMBL371719::CHEMBL492571	510665	-7.8	experimental	Inhibition	SARS-CoV	ChEMBL	NA	5400
3-[2-(3,4-Dihydroxy-phenyl)-3,5-dihydroxy-4-oxo-4H-chromen-7-yloxymethyl]-benzonitrile::CHEMBL551131	44517748	-9.2	experimental	Inhibition	SARS-CoV	ChEMBL	NA	2700
7-(3-Chloro-benzyloxy)-2-(3,4-dihydroxy-phenyl)-3,5-dihydroxy-chromen-4-one::CHEMBL551130	45271826	-9.3	experimental	Inhibition	SARS-CoV	ChEMBL	NA	5200
7-(4-Chloro-benzyloxy)-2-(3,4-dihydroxy-phenyl)-3,5-dihydroxy-chromen-4-one::CHEMBL550256	45270979	-9.2	experimental	Inhibition	SARS-CoV	ChEMBL	NA	4100
3-(2-Benzo[1,3]dioxol-5-yl-3,5-dihydroxy-4-oxo-4H-chromen-7-yloxymethyl)-benzonitrile::CHEMBL551529	45271832	-9.6	experimental	Inhibition	SARS-CoV	ChEMBL	NA	8100
2-Benzo[1,3]dioxol-5-yl-7-(4-chloro-benzyloxy)-3,5-dihydroxy-chromen-4-one::CHEMBL551334	45271831	-8.9	experimental	Inhibition	SARS-CoV	ChEMBL	NA	9300
CHEMBL3809329	127043641	-9.5	experimental	Inhibition	SARS-CoV	ChEMBL	NA	6000
CHEMBL3808427	127043642	-9.1	experimental	Inhibition	SARS-CoV	ChEMBL	NA	5800
CHEMBL3809861	127043644	-9.7	experimental	Inhibition	SARS-CoV	ChEMBL	NA	6400
CHEMBL3809579	127045221	-9.5	experimental	Inhibition	SARS-CoV	ChEMBL	NA	8600
CHEMBL3809053	127045229	-9.8	experimental	Inhibition	SARS-CoV	ChEMBL	NA	6700
IGUESTERIN	46881919	-8.9	experimental	Inhibition	SARS-CoV	ChEMBL	NA	2600
CHEMBL1277046	49870840	-8.7	experimental	Inhibition	SARS-CoV	ChEMBL	NA	5500
CHEMBL1277227	49870842	-9.1	experimental	Inhibition	SARS-CoV	ChEMBL	NA	6800
CHEMBL1277228	49870841	-9.9	experimental	Inhibition	SARS-CoV	ChEMBL	NA	8400
18-OXOFERRUGINOL	52946772	-7.5	experimental	Inhibition	SARS-CoV	ChEMBL	70.5	163200
CHEMBL1277754	52945977	-7.2	experimental	Inhibition	SARS-CoV	ChEMBL	78.6	128900
KAYADIOL	52948928	-8.2	experimental	Inhibition	SARS-CoV	ChEMBL	75.2	137700
CHEMBL1315054	2131982	-8.5	experimental	Inhibition	SARS-CoV	ChEMBL	81.43	41390
CHEMBL1350514	2131972	-7.9	experimental	Inhibition	SARS-CoV	ChEMBL	82.59	38570
CHEMBL1487869	948801	-7.2	experimental	Inhibition	SARS-CoV	ChEMBL	50	18200
CHEMBL1774322	1328543	-8.6	experimental	Inhibition	SARS-CoV	ChEMBL	58.23	58350
CHEMBL1774323	5735082	-7.1	experimental	Inhibition	SARS-CoV	ChEMBL	61.36	62790
CHEMBL1774325	135470831	-7.7	experimental	Inhibition	SARS-CoV	ChEMBL	56.11	77090
CHEMBL1774326	1265413	-8.8	experimental	Inhibition	SARS-CoV	ChEMBL	53.27	90720
FERRUGINOL	442027	-7.7	experimental	Inhibition	SARS-CoV	ChEMBL	92.7	NA
CHEMBL226271	16728904	-7.8	experimental	Inhibition	SARS-CoV	ChEMBL	50	NA
CHEMBL226272	16728906	-8.4	experimental	Inhibition	SARS-CoV	ChEMBL	50	NA
CHEMBL227509	16728912	-9.7	experimental	Inhibition	SARS-CoV	ChEMBL	50	NA
CHEMBL227510	16728914	-9.8	experimental	Inhibition	SARS-CoV	ChEMBL	50	NA
CHEMBL2441741	71544385	-8.3	experimental	Inhibition	SARS-CoV	ChEMBL	NA	230
CHEMBL2441745	71544384	-7.9	experimental	Inhibition	SARS-CoV	ChEMBL	NA	610
CHEMBL244282	16728009	-7.2	experimental	Inhibition	SARS-CoV	ChEMBL	50	NA
CHEMBL3099521	73057087	-8.8	experimental	Inhibition	SARS-CoV	ChEMBL	NA	5520
CHEMBL3099523	4614896	-7.2	experimental	Inhibition	SARS-CoV	ChEMBL	NA	9910
CHEMBL3099526	73057089	-7.3	experimental	Inhibition	SARS-CoV	ChEMBL	NA	1040
CHEMBL3099527	73057090	-8.5	experimental	Inhibition	SARS-CoV	ChEMBL	NA	1690
CHEMBL3099529	73057092	-7.8	experimental	Inhibition	SARS-CoV	ChEMBL	NA	2820
CHEMBL3099530	73057388	-9	experimental	Inhibition	SARS-CoV	ChEMBL	NA	4700
CHEMBL3099533	58589722	-7.6	experimental	Inhibition	SARS-CoV	ChEMBL	98.64	76740
CHEMBL3099541	4117477	-7.7	experimental	Inhibition	SARS-CoV	ChEMBL	NA	1180
CHEMBL3099542	73056762	-8	experimental	Inhibition	SARS-CoV	ChEMBL	NA	2250
CHEMBL3099543	76320984	-8.7	experimental	Inhibition	SARS-CoV	ChEMBL	NA	4300
CHEMBL3105076	3635406	-7.2	experimental	Inhibition	SARS-CoV	ChEMBL	50	2200
CHEMBL376552	16728903	-7.5	experimental	Inhibition	SARS-CoV	ChEMBL	50	NA
CHEMBL376553	16728913	-9.7	experimental	Inhibition	SARS-CoV	ChEMBL	50	NA
CHEMBL389909	16728907	-8.3	experimental	Inhibition	SARS-CoV	ChEMBL	50	NA
CHEMBL390122	16728909	-8.4	experimental	Inhibition	SARS-CoV	ChEMBL	50	NA
HESPERETIN	72281	-8.2	experimental	Inhibition	SARS-CoV	ChEMBL	NA	8300
CHEMBL4202812	145976006	-8.1	experimental	Inhibition	FCoV	ChEMBL	NA	1600
CHEMBL4203883	145975081	-8.2	experimental	Inhibition	MERS-CoV	ChEMBL	NA	700
CHEMBL4204431	145978039	-7.4	experimental	Inhibition	FCoV	ChEMBL	NA	1100
CHEMBL4208240	145975487	-7.4	experimental	Inhibition	MERS-CoV	ChEMBL	NA	400
CHEMBL4208764	145967285	-8.3	experimental	Inhibition	MERS-CoV	ChEMBL	NA	900
CHEMBL4212620	145964401	-7.5	experimental	Inhibition	FCoV	ChEMBL	NA	5500
CHEMBL4213159	145964420	-7.8	experimental	Inhibition	FCoV	ChEMBL	NA	2300
CHEMBL4214471	145972736	-7.8	experimental	Inhibition	MERS-CoV	ChEMBL	NA	700
CHEMBL4216101	145972809	-7.1	experimental	Inhibition	SARS-CoV	ChEMBL	NA	4100
CHEMBL4217568	145972878	-7.7	experimental	Inhibition	MERS-CoV	ChEMBL	NA	600
TINGENONE	101520	-8.6	experimental	Inhibition	SARS-CoV	ChEMBL	NA	9900
CHEMBL470323	44562940	-9	experimental	Inhibition	SARS-CoV	ChEMBL	50	NA
ECKOL	145937	-8.6	experimental	Inhibition	SARS-CoV	ChEMBL	NA	8800
CHEMBL478119	16061499	-9.4	experimental	Inhibition	SARS-CoV	ChEMBL	NA	2000
CHEMBL479172	44584893	-8.3	experimental	Inhibition	SARS-CoV	ChEMBL	NA	5400
CHEMBL487062	44563095	-7.9	experimental	Inhibition	SARS-CoV	ChEMBL	50	NA
CHEMBL487069	44563053	-7.9	experimental	Inhibition	SARS-CoV	ChEMBL	50	NA
CHEMBL488059	25189011	-7.5	experimental	Inhibition	SARS-CoV	ChEMBL	50	NA
CHEMBL488250	44563092	-7.3	experimental	Inhibition	SARS-CoV	ChEMBL	50	NA
CHEMBL488268	44562986	-7.8	experimental	Inhibition	SARS-CoV	ChEMBL	50	NA
CHEMBL492571	25256829	-7.6	experimental	Inhibition	SARS-CoV	ChEMBL	NA	5400
QUERCETIN	5280343	-7.4	experimental	Inhibition	SARS-CoV	ChEMBL	NA	8100
CHEMBL508525	11604691	-9.1	experimental	Inhibition	SARS-CoV	ChEMBL	50	NA
DIECKOL	3008868	-9.3	experimental	Inhibition	SARS-CoV	ChEMBL	60	2700
CHEMBL515787	44584944	-7.7	experimental	Inhibition	SARS-CoV	ChEMBL	NA	7300
CHEMBL540403	45266482	-9.6	experimental	Inhibition	SARS-CoV	ChEMBL	NA	3800
CHEMBL541163	45266425	-9.2	experimental	Inhibition	SARS-CoV	ChEMBL	NA	2500
PRISTIMERIN	159516	-9.3	experimental	Inhibition	SARS-CoV	ChEMBL	NA	5500
CHEMBL558828	45266488	-9.4	experimental	Inhibition	SARS-CoV	ChEMBL	NA	6600
CHEMBL61320	4117383	-7.6	experimental	Inhibition	SARS-CoV	ChEMBL	NA	4450
AMENTOFLAVONE	5281600	-10.1	experimental	Inhibition	SARS-CoV	ChEMBL	NA	8300
ABIETIC ACID	10569	-7.7	experimental	Inhibition	SARS-CoV	ChEMBL	58	189100
Abbreviations: SARS-CoV: severe acute respiratory syndrome coronavirus; F-CoV: Feline coronavirus (strain FIPV WSU-79/1146); MERS-CoV: Middle East respiratory syndrome-related coronavirus; IC50: half maximal inhibitory concentration;
