# Supplementary material for: Identification of Potential Key Agents for Targeting RNA-Dependent RNA Polymerase of SARS-CoV-2 by Integrated Analysis and Virtual Drug Screening
Source: Front Genet. 2020 Nov 17;11:581668. doi: 10.3389/fgene.2020.581668 (PMC7705243; doi:10.3389/fgene.2020.581668)
Supplement: Supplementary Table 2 — List of Compounds selected from ChEMBL. [file Table_2.XLSX]

## Sheet: Sheet1
Drug Name	PubChem CID	DrugBank ID/ other ID	Drug Group/Drug Types	Actions	Drug type	InChI Key	SMILES	Disease	Target Name
benzyl (2-oxopropyl)carbamate	22747857	DB07293	experimental	inhibitor	Small molecular drug	GVRXLHLFAABVLJ-UHFFFAOYSA-N	CC(=O)CNC(=O)OCC1=CC=CC=C1	SARS	ORF1ab polyprotein/Replicase polyprotein 1ab
2-[(2,4-DICHLORO-5-METHYLPHENYL)SULFONYL]-1,3-DINITRO-5-(TRIFLUOROMETHYL)BENZENE	2799606	DB07620	experimental	inhibitor	Small molecular drug	INAZPZCJNPPHGV-UHFFFAOYSA-N	CC1=CC(=C(Cl)C=C1Cl)S(=O)(=O)C1=C(C=C(C=C1[N+]([O-])=O)C(F)(F)F)[N+]([O-])=O	SARS	ORF1ab polyprotein and Orf1a polyprotein/Replicase polyprotein 1a
S-[5-(TRIFLUOROMETHYL)-4H-1,2,4-TRIAZOL-3-YL] 5-(PHENYLETHYNYL)FURAN-2-CARBOTHIOATE	2822496	DB07743	experimental	inhibitor	Small molecular drug	VNGWUVBXUIDQTK-UHFFFAOYSA-N	FC(F)(F)C1=NN=C(N1)SC(=O)C1=CC=C(O1)C#CC1=CC=CC=C1	SARS	ORF1ab polyprotein and Orf1a polyprotein/Replicase polyprotein 1a
5-amino-2-methyl-N-[(1R)-1-naphthalen-1-ylethyl]benzamide	24941262	DB08656	experimental	inhibitor	Small molecular drug	UVERBUNNCOKGNZ-CQSZACIVSA-N	[H][C@](C)(NC(=O)C1=C(C)C=CC(N)=C1)C1=CC=CC2=C1C=CC=C2	SARS	ORF1ab polyprotein/Replicase polyprotein 1ab
NALPHA-[(BENZYLOXY)CARBONYL]-N-[(1R)-4-HYDROXY-1-METHYL-2-OXOBUTYL]-L-PHENYLALANINAMIDE	16220131	DB08732	experimental	inhibitor	Small molecular drug	UUOOAGBWJUGBMV-APWZRJJASA-N	[H][C@](C)(NC(=O)[C@]([H])(CC1=CC=CC=C1)NC(=O)OCC1=CC=CC=C1)C(=O)CCO	SARS	ORF1ab polyprotein and Orf1a polyprotein/Replicase polyprotein 1a
4-(DIMETHYLAMINO)BENZOIC ACID	12092	DB08748	experimental	inhibitor	Small molecular drug	YDIYEOMDOWUDTJ-UHFFFAOYSA-N	CN(C)C1=CC=C(C=C1)C(O)=O	SARS	ORF1ab polyprotein and Orf1a polyprotein
Remdesivir /IUPAC Name: 2-ethylbutyl (2S)-2-[[[(2R,3S,4R,5R)-5-(4-aminopyrrolo[2,1-f][1,2,4]triazin-7-yl)-5-cyano-3,4-dihydroxyoxolan-2-yl]methoxy-phenoxyphosphoryl]amino]propanoate	121304016	DB14761/ CHEMBL4065616	Investigational	inhibitor	Small molecular drug	RWWYLEGWBNMMLJ-YSOARWBDSA-N	CCC(CC)COC(=O)[C@H](C)N[P@](=O)(OC[C@H]1O[C@](C#N)([C@H](O)[C@@H]1O)C1=CC=C2N1N=CN=C2N)OC1=CC=CC=C1	Zaire ebolavirus (strain Mayinga-76) SARS-CoV	RNA-directed RNA polymerase L Replicase polyprotein 1ab
Sofosbuvir (PSI-7977, GS-7977); Hepcvir; Hepcinat;	45375808	TTD ID/D0D4YZ	Approved	Modulator	Small molecular drug	TTZHDVOVKQGIBA-IQWMDFIBSA-N	CC(C)OC(=O)C(C)NP(=O)(OCC1C(C(C(O1)N2C=CC(=O)NC2=O)(C)F<br />)O)OC3=CC=CC=C3	Hepatitis C virus infection; Virus infection;	Hepatitis C virus RNA-directed RNA polymerase (HCV NS5B)
Rifamycin	6324616	D0FX2Q	Approved	Modulator, Inhibitor	Small molecular drug	HJYYPODYNSCCOU-ODRIEIDWSA-N	CC(C)(C(=O)NC(CC1=CNC2=CC=CC=C21)C(=O)NC(CC3=CNC4=CC=CC=C43)NC=O)N	Diarrhea; Infectious disease; Hepatitis C virus infection; Head and neck cancer;	Staphylococcus Plastid RNA polymerase beta (Stap-coc rpoB);
Baloxavir marboxil	124081896	D0O5AG	Approved	Inhibitor	NA	RZVPBGBYGMDSBG-GGAORHGYSA-N	COC(=O)OCOC1=C2C(=O)N3CCOCC3N(N2C=CC1=O)C4C5=C(CSC6=CC=CC=C46)C(=C(C=C5)F)F	Influenza virus infection	Influenza Polymerase acidic endonuclease (Influ PA)
Rifamycin	6324616	D0FX2Q	Approved	Modulator, Inhibitor	Small molecular drug	HJYYPODYNSCCOU-ODRIEIDWSA-N	CC(C)(C(=O)NC(CC1=CNC2=CC=CC=C21)C(=O)NC(CC3=CNC4=CC=CC=C43)NC=O)N	Diarrhea; Infectious disease; Hepatitis C virus infection; Head and neck cancer;	Bacterial RNA polymerase sigma factor SigA (Bact sigA);
Rifamycin	6324616	D0FX2Q	Approved	Modulator, Inhibitor	Small molecular drug	HJYYPODYNSCCOU-ODRIEIDWSA-N	CC(C)(C(=O)NC(CC1=CNC2=CC=CC=C21)C(=O)NC(CC3=CNC4=CC=CC=C43)NC=O)N	Diarrhea; Infectious disease; Hepatitis C virus infection; Head and neck cancer;	Mycobacterium RNA polymerase (MycB RNAP)
AVI-6002/NeuGene Plus (Ebola virus), AVI; Neugene (Ebola virus), AVI BioPharma; Polymerase cofactor VP35 modulator (Ebola virus infection,TSO)	NA	D04LIH	Phase 1	Modulator	NA	NA	NA	Ebola virus infection; Marburg virus infection;	Ebola virus VP24 messenger RNA (EV VP24 mRNA); Ebola virus VP35 messenger RNA (EV VP35 mRNA)
VX-787	NA	D08DHN	Phase 2	Inhibitor	NA	NA	NA	Influenza A virus infection	Influenza Polymerase basic protein 2 (Influ PB2)
Lurbinectedin	57327016	D0V6OA	Phase 2	Inhibitor	Small molecular drug	NA	NA	leukaemia; Solid tumour/cancer;	DNA-directed RNA polymerase II (RNAP II)
Macrocycle derivative 14	136644752	D03OIA		Inhibitor	Small molecular drug	LGJSILJEEDDVAZ-UHFFFAOYSA-N		Pain/Cyclin-dependent kinase inhibitors for cancer therapy:	Cyclin-dependent kinase 8 (CDK8)
ISIS 2922/Formivirsen sodium	16130321	D0G1GP	Withdrawn from market		Antisense drug	NA	NA	Cytomegalovirus infection	Cytomegalovirus DNA polymerase messenger RNA (CMV DNA polymerase mRNA)
Pyrophosphate 2-/dihydrogen diphosphate; diphosphate(2-);	4995	D0A1DU	Investigative	Inhibitor	Small molecular drug	XPPKVPWEQAFLFU-UHFFFAOYSA-L	OP(=O)([O-])OP(=O)(O)[O-]	Virus infection	Virus RNA-dependent RNA polymerase (Viru RdRP)
ISIS 3304	NA	D0EJ7Q	Investigative	NA	Antisense drug	NA	NA	NA	Influenza PB1 messenger RNA (Influ PB1 mRNA)
ISIS 3303	NA	D0ZF2W	Investigative	NA	Antisense drug	NA	NA		Influenza PB2 messenger RNA (Influ PB2 mRNA)
Rifampin	6243627	D0G3DL	Approved	Inhibitor	Small molecular drug	FZYOVNIOYYPUPY-HEGPSGTHSA-N	CC1C=CC=C(C(=O)NC2=C(C3=C(C(=C4C(=C3C(=O)C2=CNN5CCN(CC5<br />)C)C(=O)C(O4)(OC=CC(C(C(C(C(C(C1O)C)O)C)OC(=O)C)C)OC)C)<br />C)O)O)C	Tuberculosis; Clostridium difficile associated diarrhea	Bacterial RNA polymerase switch region (Bact RNAP-SR)
Rifapentine	135659016	D0G9IU	Approved	Binder	Small molecular drug	WDZCUPBHRAEYDL-PRHSTWAZSA-N	CC1C=CC=C(C(=O)NC2=C(C3=C(C4=C(C(=C3O)C)OC(C4=O)(OC=CC(C(C(C(C(C(C1O)C)O)C)OC(=O)C)C)OC)C)C(=C2C=NN5CCN(CC5)C6CCCC6)O)O)C	Tuberculosis; Macular degeneration	DNA-directed RNA polymerase (RNAP)
T72701	NA	NA	NA	NA	NA	NA	NA	NA	Bacterial DNA-directed RNA polymerase beta' (Bact rpoC)
T07607	NA	NA	NA	NA	NA	NA	NA	NA	DNA-directed RNA polymerase II RPB7 (hsRPB7)
T78338	NA	NA	NA	NA	NA	NA	NA	NA	Flavivirus RNA-directed RNA polymerase NS5 (FlaV NS5)
T95865	NA	NA	NA	NA	NA	NA	NA	NA	Cofactor of initiator function (CIF)
T89530	NA	NA	NA	NA	NA	NA	NA	NA	DNA-directed RNA polymerase I (RNAP I)
T13937	NA	NA	NA	NA	NA	NA	NA	NA	Mycobacterium DNA-dependent RNA polymerase beta (MycB rpoB)
Pyrophosphate 2-	NA	NA	NA	NA	NA	NA	NA	NA	Virus RNA-dependent RNA polymerase (Viru RdRP)
T72701	NA	NA	NA	NA	NA	NA	NA	NA	Bacterial DNA-directed RNA polymerase beta' (Bact rpoC)
ISIS 3304	NA	NA	NA	NA	NA	NA	NA	NA	Influenza PB1 messenger RNA (Influ PB1 mRNA)
ISIS 3303	NA	NA	NA	NA	NA	NA	NA	NA	Influenza PB2 messenger RNA (Influ PB2 mRNA)
Drug Types: Approved, Vet approved, Nutraceutical, Illicit, Withdrawn, Investigational
