# Supplementary material for: Identification of Potential Key Agents for Targeting RNA-Dependent RNA Polymerase of SARS-CoV-2 by Integrated Analysis and Virtual Drug Screening
Source: Front Genet. 2020 Nov 17;11:581668. doi: 10.3389/fgene.2020.581668 (PMC7705243; doi:10.3389/fgene.2020.581668)
Supplement: Supplementary Table 3 — List of Compounds selected from Binding Database. [file Table_3.XLSX]

## Sheet: ChE
Molecule ChEMBL ID	Molecule Name	Molecule Max Phase	Molecular Weight	#RO5 Violations	AlogP	Compound Key	Smiles	Standard Type	Standard Relation	Standard Value	Standard Units	pChEMBL Value	Data Validity Comment	Comment	Uo Units	Ligand Efficiency BEI	Ligand Efficiency LE	Ligand Efficiency LLE	Ligand Efficiency SEI	Potential Duplicate	Assay ChEMBL ID	Assay Description	Assay Type	BAO Format ID	BAO Label	Assay Organism	Assay Tissue ChEMBL ID	Assay Tissue Name	Assay Cell Type	Assay Subcellular Fraction	Target ChEMBL ID	Target Name	Target Organism	Target Type	Document ChEMBL ID	Source ID	Source Description	Document Journal	Document Year	Cell ChEMBL ID
CHEMBL71893	ABIETIC ACID	0	302.46	1	5.21	Abietic acid	CC(C)C1=CC2=CC[C@H]3[C@](C)(C(=O)O)CCC[C@]3(C)[C@H]2CC1	Inhibition	'='	58	%				UO_0000187					FALSE	CHEMBL1286521	Inhibition of SARS coronavirus 3C-like protease at 200 uM after 60 mins by FRET assay	B	BAO_0000019	assay format	SARS coronavirus					CHEMBL5118	Replicase polyprotein 1ab	SARS coronavirus	SINGLE PROTEIN	CHEMBL1275337	1	Scientific Literature	Bioorg. Med. Chem.	2010
CHEMBL197308	FERRUGINOL	0	286.46	1	5.55	3	CC(C)c1cc2c(cc1O)[C@@]1(C)CCCC(C)(C)[C@@H]1CC2	IC50	'='	49600	nM	4.3			UO_0000065	15.03	0.28	-1.25	21.28	FALSE	CHEMBL1286522	Inhibition of SARS coronavirus 3C-like protease after 60 mins by FRET assay	B	BAO_0000019	assay format	SARS coronavirus					CHEMBL5118	Replicase polyprotein 1ab	SARS coronavirus	SINGLE PROTEIN	CHEMBL1275337	1	Scientific Literature	Bioorg. Med. Chem.	2010
CHEMBL208908	SCIADOPITISIN	0	580.55	2	6.04	12	COc1ccc(-c2cc(=O)c3c(O)cc(O)c(-c4cc(-c5cc(=O)c6c(O)cc(OC)cc6o5)ccc4OC)c3o2)cc1	IC50	'='	38400	nM	4.42			UO_0000065	7.61	0.14	-1.62	2.97	FALSE	CHEMBL1286522	Inhibition of SARS coronavirus 3C-like protease after 60 mins by FRET assay	B	BAO_0000019	assay format	SARS coronavirus					CHEMBL5118	Replicase polyprotein 1ab	SARS coronavirus	SINGLE PROTEIN	CHEMBL1275337	1	Scientific Literature	Bioorg. Med. Chem.	2010
CHEMBL378188	BILOBETIN	0	552.49	2	5.44	10	COc1ccc(-c2cc(=O)c3c(O)cc(O)cc3o2)cc1-c1c(O)cc(O)c2c(=O)cc(-c3ccc(O)cc3)oc12	Ki	'='	80400	nM	4.09			UO_0000065	7.41	0.14	-1.35	2.4	FALSE	CHEMBL1286520	Non-competitive inhibition of SARS coronavirus 3C-like protease by Dixon plot analysis	B	BAO_0000019	assay format	SARS coronavirus					CHEMBL5118	Replicase polyprotein 1ab	SARS coronavirus	SINGLE PROTEIN	CHEMBL1275337	1	Scientific Literature	Bioorg. Med. Chem.	2010
CHEMBL559870	DIOXINODEHYDROECKOL	0	370.27	0	4.32	4	Oc1cc(O)c2oc3cc(O)c4oc5cc(O)cc(O)c5oc4c3oc2c1	Ki						Not Determined						FALSE	CHEMBL2395055	Competitive inhibition of C-terminal His6-tagged recombinant SARS coronavirus 3C-like protease trans-cleavage activity expressed in Escherichia coli BL21 (DE3) using Dabcyl-KTSAVLQSGFRKME as substrate after 60 mins by Dixon plot analysis	B	BAO_0000019	assay format	SARS coronavirus					CHEMBL5118	Replicase polyprotein 1ab	SARS coronavirus	SINGLE PROTEIN	CHEMBL2390950	1	Scientific Literature	Bioorg. Med. Chem.	2013
CHEMBL1092797	DIHYDROCELASTROL	0	452.64	1	6.64	5	Cc1c(O)c(O)cc2c1CC=C1[C@@]3(C)CC[C@@]4(C)CC[C@@](C)(C(=O)O)C[C@H]4[C@]3(C)CC[C@]12C	IC50	'='	21700	nM	4.66			UO_0000065	10.3	0.19	-1.98	6	FALSE	CHEMBL1113303	Inhibition of 3C-like protease of SARS coronavirus assessed as concentration of FRET peptide for 60 mins	B	BAO_0000019	assay format	SARS coronavirus					CHEMBL5118	Replicase polyprotein 1ab	SARS coronavirus	SINGLE PROTEIN	CHEMBL1155394	1	Scientific Literature	Bioorg. Med. Chem. Lett.	2010
CHEMBL54804	PRISTIMERIN	0	464.65	1	6.79	2	COC(=O)[C@]1(C)CC[C@]2(C)CC[C@]3(C)C4=CC=C5C(=CC(=O)C(O)=C5C)[C@]4(C)CC[C@@]3(C)[C@@H]2C1	Ki	'='	3100	nM	5.51			UO_0000065	11.86	0.22	-1.28	8.66	FALSE	CHEMBL1113304	Inhibition of 3C-like protease of SARS coronavirus assessed as concentration of FRET peptide for 60 mins by dixon plot	B	BAO_0000019	assay format	SARS coronavirus					CHEMBL5118	Replicase polyprotein 1ab	SARS coronavirus	SINGLE PROTEIN	CHEMBL1155394	1	Scientific Literature	Bioorg. Med. Chem. Lett.	2010
CHEMBL116438	CURCUMIN	3	368.39	0	3.85	Curcumin	COc1cc(/C=C/C(=O)/C=C(O)/C=C/c2ccc(O)c(OC)c2)ccc1O	Ki						Not Determined						FALSE	CHEMBL1113304	Inhibition of 3C-like protease of SARS coronavirus assessed as concentration of FRET peptide for 60 mins by dixon plot	B	BAO_0000019	assay format	SARS coronavirus					CHEMBL5118	Replicase polyprotein 1ab	SARS coronavirus	SINGLE PROTEIN	CHEMBL1155394	1	Scientific Literature	Bioorg. Med. Chem. Lett.	2010
CHEMBL1278031		0	358.83	1	5.17	2g	O=C1/C(=C\c2ccccc2)C(c2ccccc2)=NN1c1ccc(Cl)cc1	Inhibition						Not Active						FALSE	CHEMBL1285498	Inhibition of SARS coronavirus 3C-like protease at 50 uM by fluorescence plate reader analysis	B	BAO_0000019	assay format	SARS coronavirus					CHEMBL5118	Replicase polyprotein 1ab	SARS coronavirus	SINGLE PROTEIN	CHEMBL1275368	1	Scientific Literature	Bioorg. Med. Chem.	2010
CHEMBL1276871		0	398.42	0	4.23	2m	COc1ccc(N2N=C(c3ccccc3)/C(=C/c3ccc(C(=O)O)cc3)C2=O)cc1	IC50	'='	12000	nM	4.92			UO_0000065	12.35	0.22	0.69	6.21	FALSE	CHEMBL1285497	Inhibition of SARS coronavirus 3C-like protease by fluorescence plate reader analysis	B	BAO_0000019	assay format	SARS coronavirus					CHEMBL5118	Replicase polyprotein 1ab	SARS coronavirus	SINGLE PROTEIN	CHEMBL1275368	1	Scientific Literature	Bioorg. Med. Chem.	2010
CHEMBL1276959		0	424.5	1	5.52	2o	CC(C)(C)c1ccc(N2N=C(c3ccccc3)/C(=C/c3ccc(C(=O)O)cc3)C2=O)cc1	Inhibition						Not Active						FALSE	CHEMBL1285498	Inhibition of SARS coronavirus 3C-like protease at 50 uM by fluorescence plate reader analysis	B	BAO_0000019	assay format	SARS coronavirus					CHEMBL5118	Replicase polyprotein 1ab	SARS coronavirus	SINGLE PROTEIN	CHEMBL1275368	1	Scientific Literature	Bioorg. Med. Chem.	2010
CHEMBL1277047		0	452.39	1	5.12	2q	O=C(O)c1ccc(/C=C2\C(=O)N(c3ccc(OC(F)(F)F)cc3)N=C2c2ccccc2)cc1	IC50	'='	42000	nM	4.38			UO_0000065	9.67	0.18	-0.74	5.53	FALSE	CHEMBL1285497	Inhibition of SARS coronavirus 3C-like protease by fluorescence plate reader analysis	B	BAO_0000019	assay format	SARS coronavirus					CHEMBL5118	Replicase polyprotein 1ab	SARS coronavirus	SINGLE PROTEIN	CHEMBL1275368	1	Scientific Literature	Bioorg. Med. Chem.	2010
CHEMBL221366		0	205.24	0	2.36	5	O=C(Oc1cccnc1)c1cccs1	IC50	'='	500	nM	6.3			UO_0000065	30.7	0.61	3.94	16.08	FALSE	CHEMBL1000655	Inhibition of SARS coronavirus isolate Tor2 3C-like protease by FRET assay	B	BAO_0000019	assay format	SARS coronavirus					CHEMBL5118	Replicase polyprotein 1ab	SARS coronavirus	SINGLE PROTEIN	CHEMBL1136973	1	Scientific Literature	Bioorg. Med. Chem. Lett.	2009
CHEMBL1774324		0	486.55	0	2.97	3	Cc1nc(C)c(C(=O)C2=C(O)C(=O)N(CCCN3CCOCC3)C2c2cccc([N+](=O)[O-])c2)s1	IC50	'='	101380	nM		Outside typical range		UO_0000065					FALSE	CHEMBL1777452	Inhibition of SARS coronavirus recombinant 3C-like protease expressed in Escherichia coli BL21(DE3) after 30 mins by FRET based assay	B	BAO_0000019	assay format	SARS coronavirus					CHEMBL5118	Replicase polyprotein 1ab	SARS coronavirus	SINGLE PROTEIN	CHEMBL1773021	1	Scientific Literature	Bioorg. Med. Chem. Lett.	2011
CHEMBL1350514		0	476.53	0	4	6	Cc1ccc(C(=O)N/C(=C\c2ccc(-c3cccc([N+](=O)[O-])c3)o2)C(=O)NCCCN(C)C)cc1	IC50	'='	38570	nM	4.41			UO_0000065	9.26	0.17	0.41	3.75	FALSE	CHEMBL1777452	Inhibition of SARS coronavirus recombinant 3C-like protease expressed in Escherichia coli BL21(DE3) after 30 mins by FRET based assay	B	BAO_0000019	assay format	SARS coronavirus					CHEMBL5118	Replicase polyprotein 1ab	SARS coronavirus	SINGLE PROTEIN	CHEMBL1773021	1	Scientific Literature	Bioorg. Med. Chem. Lett.	2011
CHEMBL1315054		0	476.53	0	4	7	Cc1ccc(C(=O)N/C(=C\c2ccc(-c3ccccc3[N+](=O)[O-])o2)C(=O)NCCCN(C)C)cc1	IC50	'='	41390	nM	4.38			UO_0000065	9.2	0.17	0.38	3.72	FALSE	CHEMBL1777452	Inhibition of SARS coronavirus recombinant 3C-like protease expressed in Escherichia coli BL21(DE3) after 30 mins by FRET based assay	B	BAO_0000019	assay format	SARS coronavirus					CHEMBL5118	Replicase polyprotein 1ab	SARS coronavirus	SINGLE PROTEIN	CHEMBL1773021	1	Scientific Literature	Bioorg. Med. Chem. Lett.	2011
CHEMBL555061		0	614.66	1	2.72	8b	CC(C)C[C@H](NC(=O)[C@@H](NC(=O)OCc1ccccc1)C(C)C)C(=O)N[C@@H](CCC(=O)N1CCOCC1)C(=O)C(F)(F)F	Ki	'='	21000	nM	4.68			UO_0000065	7.61	0.15	1.96	3.27	FALSE	CHEMBL1027049	Inhibition of SARS coronavirus 3CL protease pretreated for 10 mins before substrate addition	B	BAO_0000019	assay format	SARS coronavirus					CHEMBL5118	Replicase polyprotein 1ab	SARS coronavirus	SINGLE PROTEIN	CHEMBL1151865	1	Scientific Literature	Bioorg. Med. Chem. Lett.	2009
CHEMBL555062		0	629.78	1	2.93	14a	CC(C)C[C@H](NC(=O)[C@@H](NC(=O)OCc1ccccc1)C(C)C)C(=O)N[C@@H](CCC(=O)N1CCOCC1)C(=O)c1nccs1	Ki	'='	478000	nM		Outside typical range		UO_0000065					FALSE	CHEMBL1027049	Inhibition of SARS coronavirus 3CL protease pretreated for 10 mins before substrate addition	B	BAO_0000019	assay format	SARS coronavirus					CHEMBL5118	Replicase polyprotein 1ab	SARS coronavirus	SINGLE PROTEIN	CHEMBL1151865	1	Scientific Literature	Bioorg. Med. Chem. Lett.	2009
CHEMBL537916		0	699.81	1	4.02	8d	CCCN(CCC)C(=O)CC[C@H](NC(=O)[C@H](CC(C)C)NC(=O)[C@@H](NC(=O)[C@H](C)NC(=O)OCc1ccccc1)C(C)C)C(=O)C(F)(F)F	Ki	'='	297000	nM		Outside typical range		UO_0000065					FALSE	CHEMBL1027049	Inhibition of SARS coronavirus 3CL protease pretreated for 10 mins before substrate addition	B	BAO_0000019	assay format	SARS coronavirus					CHEMBL5118	Replicase polyprotein 1ab	SARS coronavirus	SINGLE PROTEIN	CHEMBL1151865	1	Scientific Literature	Bioorg. Med. Chem. Lett.	2009
CHEMBL1774322		0	415.55	1	5.42	1	Nc1nc(CSc2nnc(-c3cccc4ccccc34)n2-c2ccccc2)cs1	Inhibition	'='	58.23	%				UO_0000187					FALSE	CHEMBL1777451	Inhibition of SARS coronavirus recombinant 3C-like protease expressed in Escherichia coli BL21(DE3) at 100 uM after 18 mins by FRET based assay	B	BAO_0000019	assay format	SARS coronavirus					CHEMBL5118	Replicase polyprotein 1ab	SARS coronavirus	SINGLE PROTEIN	CHEMBL1773021	1	Scientific Literature	Bioorg. Med. Chem. Lett.	2011
CHEMBL1774324		0	486.55	0	2.97	3	Cc1nc(C)c(C(=O)C2=C(O)C(=O)N(CCCN3CCOCC3)C2c2cccc([N+](=O)[O-])c2)s1	Inhibition	'='	49.14	%				UO_0000187					FALSE	CHEMBL1777451	Inhibition of SARS coronavirus recombinant 3C-like protease expressed in Escherichia coli BL21(DE3) at 100 uM after 18 mins by FRET based assay	B	BAO_0000019	assay format	SARS coronavirus					CHEMBL5118	Replicase polyprotein 1ab	SARS coronavirus	SINGLE PROTEIN	CHEMBL1773021	1	Scientific Literature	Bioorg. Med. Chem. Lett.	2011
CHEMBL197308	FERRUGINOL	0	286.46	1	5.55	3	CC(C)c1cc2c(cc1O)[C@@]1(C)CCCC(C)(C)[C@@H]1CC2	Inhibition	'='	92.7	%				UO_0000187					FALSE	CHEMBL1286521	Inhibition of SARS coronavirus 3C-like protease at 200 uM after 60 mins by FRET assay	B	BAO_0000019	assay format	SARS coronavirus					CHEMBL5118	Replicase polyprotein 1ab	SARS coronavirus	SINGLE PROTEIN	CHEMBL1275337	1	Scientific Literature	Bioorg. Med. Chem.	2010
CHEMBL1277661	HINOKIOL	0	302.46	0	4.52	2	CC(C)c1cc2c(cc1O)[C@@]1(C)CC[C@H](O)C(C)(C)[C@@H]1CC2	IC50	'='	233400	nM		Outside typical range		UO_0000065					FALSE	CHEMBL1286522	Inhibition of SARS coronavirus 3C-like protease after 60 mins by FRET assay	B	BAO_0000019	assay format	SARS coronavirus					CHEMBL5118	Replicase polyprotein 1ab	SARS coronavirus	SINGLE PROTEIN	CHEMBL1275337	1	Scientific Literature	Bioorg. Med. Chem.	2010
CHEMBL1277840	KAYADIOL	0	306.49	0	4.48	8	C=C1CC[C@H]2[C@](C)(CO)CCC[C@]2(C)[C@H]1CC/C(C)=C\CO	IC50	'='	137700	nM		Outside typical range		UO_0000065					FALSE	CHEMBL1286522	Inhibition of SARS coronavirus 3C-like protease after 60 mins by FRET assay	B	BAO_0000019	assay format	SARS coronavirus					CHEMBL5118	Replicase polyprotein 1ab	SARS coronavirus	SINGLE PROTEIN	CHEMBL1275337	1	Scientific Literature	Bioorg. Med. Chem.	2010
CHEMBL378188	BILOBETIN	0	552.49	2	5.44	10	COc1ccc(-c2cc(=O)c3c(O)cc(O)cc3o2)cc1-c1c(O)cc(O)c2c(=O)cc(-c3ccc(O)cc3)oc12	IC50	'='	72300	nM	4.14			UO_0000065	7.49	0.14	-1.3	2.42	FALSE	CHEMBL1286522	Inhibition of SARS coronavirus 3C-like protease after 60 mins by FRET assay	B	BAO_0000019	assay format	SARS coronavirus					CHEMBL5118	Replicase polyprotein 1ab	SARS coronavirus	SINGLE PROTEIN	CHEMBL1275337	1	Scientific Literature	Bioorg. Med. Chem.	2010
CHEMBL50	QUERCETIN	3	302.24	0	1.99	Quercetin	O=c1c(O)c(-c2ccc(O)c(O)c2)oc2cc(O)cc(O)c12	IC50	'='	23800	nM	4.62			UO_0000065	15.3	0.29	2.63	3.52	FALSE	CHEMBL1286522	Inhibition of SARS coronavirus 3C-like protease after 60 mins by FRET assay	B	BAO_0000019	assay format	SARS coronavirus					CHEMBL5118	Replicase polyprotein 1ab	SARS coronavirus	SINGLE PROTEIN	CHEMBL1275337	1	Scientific Literature	Bioorg. Med. Chem.	2010
CHEMBL54804	PRISTIMERIN	0	464.65	1	6.79	2	COC(=O)[C@]1(C)CC[C@]2(C)CC[C@]3(C)C4=CC=C5C(=CC(=O)C(O)=C5C)[C@]4(C)CC[C@@]3(C)[C@@H]2C1	IC50	'='	5500	nM	5.26			UO_0000065	11.32	0.21	-1.53	8.27	FALSE	CHEMBL1113303	Inhibition of 3C-like protease of SARS coronavirus assessed as concentration of FRET peptide for 60 mins	B	BAO_0000019	assay format	SARS coronavirus					CHEMBL5118	Replicase polyprotein 1ab	SARS coronavirus	SINGLE PROTEIN	CHEMBL1155394	1	Scientific Literature	Bioorg. Med. Chem. Lett.	2010
CHEMBL512164	ISOPIMARIC ACID	0	302.46	1	5.21	7	C=C[C@@]1(C)CC[C@H]2C(=CC[C@H]3[C@](C)(C(=O)O)CCC[C@]23C)C1	IC50	'='	283500	nM		Outside typical range		UO_0000065					FALSE	CHEMBL1286522	Inhibition of SARS coronavirus 3C-like protease after 60 mins by FRET assay	B	BAO_0000019	assay format	SARS coronavirus					CHEMBL5118	Replicase polyprotein 1ab	SARS coronavirus	SINGLE PROTEIN	CHEMBL1275337	1	Scientific Literature	Bioorg. Med. Chem.	2010
CHEMBL12798	METHYL DEHYDROABIETATE	0	314.47	0	4.99	6	COC(=O)[C@]1(C)CCC[C@]2(C)c3ccc(C(C)C)cc3CC[C@H]21	IC50	'='	207000	nM		Outside typical range		UO_0000065					FALSE	CHEMBL1286522	Inhibition of SARS coronavirus 3C-like protease after 60 mins by FRET assay	B	BAO_0000019	assay format	SARS coronavirus					CHEMBL5118	Replicase polyprotein 1ab	SARS coronavirus	SINGLE PROTEIN	CHEMBL1275337	1	Scientific Literature	Bioorg. Med. Chem.	2010
CHEMBL1277944		0	368.39	0	4.22	2d	O=C(O)c1ccc(/C=C2\C(=O)N(c3ccccc3)N=C2c2ccccc2)cc1	IC50	'='	18000	nM	4.75			UO_0000065	12.88	0.23	0.52	6.78	FALSE	CHEMBL1285497	Inhibition of SARS coronavirus 3C-like protease by fluorescence plate reader analysis	B	BAO_0000019	assay format	SARS coronavirus					CHEMBL5118	Replicase polyprotein 1ab	SARS coronavirus	SINGLE PROTEIN	CHEMBL1275368	1	Scientific Literature	Bioorg. Med. Chem.	2010
CHEMBL1277227		0	386.38	0	4.36	2t	O=C(O)c1ccc(/C=C2\C(=O)N(c3ccc(F)cc3)N=C2c2ccccc2)cc1	IC50	'='	6800	nM	5.17			UO_0000065	13.37	0.24	0.81	7.39	FALSE	CHEMBL1285497	Inhibition of SARS coronavirus 3C-like protease by fluorescence plate reader analysis	B	BAO_0000019	assay format	SARS coronavirus					CHEMBL5118	Replicase polyprotein 1ab	SARS coronavirus	SINGLE PROTEIN	CHEMBL1275368	1	Scientific Literature	Bioorg. Med. Chem.	2010
CHEMBL1277945		0	367.45	0	4.59	2e	CN(C)c1ccc(/C=C2\C(=O)N(c3ccccc3)N=C2c2ccccc2)cc1	Inhibition						Not Active						FALSE	CHEMBL1285498	Inhibition of SARS coronavirus 3C-like protease at 50 uM by fluorescence plate reader analysis	B	BAO_0000019	assay format	SARS coronavirus					CHEMBL5118	Replicase polyprotein 1ab	SARS coronavirus	SINGLE PROTEIN	CHEMBL1275368	1	Scientific Literature	Bioorg. Med. Chem.	2010
CHEMBL1277866		0	381.44	0	4.48	2c	CC(=O)Nc1ccc(/C=C2\C(=O)N(c3ccccc3)N=C2c2ccccc2)cc1	Inhibition						Not Active						FALSE	CHEMBL1285498	Inhibition of SARS coronavirus 3C-like protease at 50 uM by fluorescence plate reader analysis	B	BAO_0000019	assay format	SARS coronavirus					CHEMBL5118	Replicase polyprotein 1ab	SARS coronavirus	SINGLE PROTEIN	CHEMBL1275368	1	Scientific Literature	Bioorg. Med. Chem.	2010
CHEMBL1350514		0	476.53	0	4	6	Cc1ccc(C(=O)N/C(=C\c2ccc(-c3cccc([N+](=O)[O-])c3)o2)C(=O)NCCCN(C)C)cc1	Ki	'='	9110	nM	5.04			UO_0000065	10.58	0.2	1.04	4.28	FALSE	CHEMBL1777510	Inhibition of SARS coronavirus recombinant 3C-like protease expressed in Escherichia coli BL21(DE3) by Lineweaver-Burk plot analysis	B	BAO_0000019	assay format	SARS coronavirus					CHEMBL5118	Replicase polyprotein 1ab	SARS coronavirus	SINGLE PROTEIN	CHEMBL1773021	1	Scientific Literature	Bioorg. Med. Chem. Lett.	2011
CHEMBL235873		0	659.78	2	0.87	5	CCOC(=O)/C=C/[C@H](C[C@@H]1CCNC1=O)NC(=O)[C@H](Cc1ccccc1)NC(=O)[C@@H](NC(=O)[C@H](CO)NC(=O)OC(C)(C)C)C(C)C	IC50	'='	15000	nM	4.82			UO_0000065	7.31	0.14	3.95	2.4	FALSE	CHEMBL898907	Inhibition of SARS-CoV 3C-like protease by FRET based microplate assay	B	BAO_0000019	assay format	SARS coronavirus					CHEMBL5118	Replicase polyprotein 1ab	SARS coronavirus	SINGLE PROTEIN	CHEMBL1137503	1	Scientific Literature	Bioorg. Med. Chem. Lett.	2007
CHEMBL519420		0	353.27	0	4.55	5b	CC1SC(c2c(Cl)cccc2Cl)N(Cc2cccnc2)C1=O	Inhibition	'<='	50	%				UO_0000187					FALSE	CHEMBL959057	Inhibition of SARS coronavirus nsp12 at 0.5 mM	B	BAO_0000357	single protein format	SARS coronavirus					CHEMBL5118	Replicase polyprotein 1ab	SARS coronavirus	SINGLE PROTEIN	CHEMBL1152146	1	Scientific Literature	Bioorg. Med. Chem. Lett.	2008
CHEMBL28	APIGENIN	0	270.24	0	2.58	Apigenin	O=c1cc(-c2ccc(O)cc2)oc2cc(O)cc(O)c12	Inhibition	'='	40	%				UO_0000187					FALSE	CHEMBL1286521	Inhibition of SARS coronavirus 3C-like protease at 200 uM after 60 mins by FRET assay	B	BAO_0000019	assay format	SARS coronavirus					CHEMBL5118	Replicase polyprotein 1ab	SARS coronavirus	SINGLE PROTEIN	CHEMBL1275337	1	Scientific Literature	Bioorg. Med. Chem.	2010
CHEMBL512164	ISOPIMARIC ACID	0	302.46	1	5.21	7	C=C[C@@]1(C)CC[C@H]2C(=CC[C@H]3[C@](C)(C(=O)O)CCC[C@]23C)C1	Inhibition	'='	28.9	%				UO_0000187					FALSE	CHEMBL1286521	Inhibition of SARS coronavirus 3C-like protease at 200 uM after 60 mins by FRET assay	B	BAO_0000019	assay format	SARS coronavirus					CHEMBL5118	Replicase polyprotein 1ab	SARS coronavirus	SINGLE PROTEIN	CHEMBL1275337	1	Scientific Literature	Bioorg. Med. Chem.	2010
CHEMBL1277840	KAYADIOL	0	306.49	0	4.48	8	C=C1CC[C@H]2[C@](C)(CO)CCC[C@]2(C)[C@H]1CC/C(C)=C\CO	Inhibition	'='	75.2	%				UO_0000187					FALSE	CHEMBL1286521	Inhibition of SARS coronavirus 3C-like protease at 200 uM after 60 mins by FRET assay	B	BAO_0000019	assay format	SARS coronavirus					CHEMBL5118	Replicase polyprotein 1ab	SARS coronavirus	SINGLE PROTEIN	CHEMBL1275337	1	Scientific Literature	Bioorg. Med. Chem.	2010
CHEMBL1277662	18-OXOFERRUGINOL	0	300.44	0	4.72	4	CC(C)c1cc2c(cc1O)[C@@]1(C)CCC[C@@](C)(C=O)[C@@H]1CC2	IC50	'='	163200	nM		Outside typical range		UO_0000065					FALSE	CHEMBL1286522	Inhibition of SARS coronavirus 3C-like protease after 60 mins by FRET assay	B	BAO_0000019	assay format	SARS coronavirus					CHEMBL5118	Replicase polyprotein 1ab	SARS coronavirus	SINGLE PROTEIN	CHEMBL1275337	1	Scientific Literature	Bioorg. Med. Chem.	2010
CHEMBL63354	AMENTOFLAVONE	0	538.46	3	5.13	9	O=c1cc(-c2ccc(O)c(-c3c(O)cc(O)c4c(=O)cc(-c5ccc(O)cc5)oc34)c2)oc2cc(O)cc(O)c12	IC50	'='	8300	nM	5.08			UO_0000065	9.44	0.17	-0.05	2.79	FALSE	CHEMBL1286522	Inhibition of SARS coronavirus 3C-like protease after 60 mins by FRET assay	B	BAO_0000019	assay format	SARS coronavirus					CHEMBL5118	Replicase polyprotein 1ab	SARS coronavirus	SINGLE PROTEIN	CHEMBL1275337	1	Scientific Literature	Bioorg. Med. Chem.	2010
CHEMBL71893	ABIETIC ACID	0	302.46	1	5.21	Abietic acid	CC(C)C1=CC2=CC[C@H]3[C@](C)(C(=O)O)CCC[C@]3(C)[C@H]2CC1	IC50	'='	189100	nM		Outside typical range		UO_0000065					FALSE	CHEMBL1286522	Inhibition of SARS coronavirus 3C-like protease after 60 mins by FRET assay	B	BAO_0000019	assay format	SARS coronavirus					CHEMBL5118	Replicase polyprotein 1ab	SARS coronavirus	SINGLE PROTEIN	CHEMBL1275337	1	Scientific Literature	Bioorg. Med. Chem.	2010
CHEMBL227509		0	478.4	1	6.9	4m	O=C1CSC(c2c(Cl)cccc2Cl)N1c1nc(-c2ccccc2)cc(-c2ccccc2)n1	Inhibition	'<='	50	%				UO_0000187					FALSE	CHEMBL959057	Inhibition of SARS coronavirus nsp12 at 0.5 mM	B	BAO_0000357	single protein format	SARS coronavirus					CHEMBL5118	Replicase polyprotein 1ab	SARS coronavirus	SINGLE PROTEIN	CHEMBL1152146	1	Scientific Literature	Bioorg. Med. Chem. Lett.	2008
CHEMBL244282		0	327.38	0	3.16	4s	CCc1nnc(N2C(=O)CSC2c2c(F)cccc2F)s1	Inhibition	'<='	50	%				UO_0000187					FALSE	CHEMBL959057	Inhibition of SARS coronavirus nsp12 at 0.5 mM	B	BAO_0000357	single protein format	SARS coronavirus					CHEMBL5118	Replicase polyprotein 1ab	SARS coronavirus	SINGLE PROTEIN	CHEMBL1152146	1	Scientific Literature	Bioorg. Med. Chem. Lett.	2008
CHEMBL488259		0	328.22	0	4.36	4q	O=C1CSC(c2c(Cl)cccc2Cl)N1Cc1ccco1	Inhibition	'<='	50	%				UO_0000187					FALSE	CHEMBL959057	Inhibition of SARS coronavirus nsp12 at 0.5 mM	B	BAO_0000357	single protein format	SARS coronavirus					CHEMBL5118	Replicase polyprotein 1ab	SARS coronavirus	SINGLE PROTEIN	CHEMBL1152146	1	Scientific Literature	Bioorg. Med. Chem. Lett.	2008
CHEMBL227510		0	445.49	1	5.87	4o	O=C1CSC(c2c(F)cccc2F)N1c1nc(-c2ccccc2)cc(-c2ccccc2)n1	Inhibition	'<='	50	%				UO_0000187					FALSE	CHEMBL959057	Inhibition of SARS coronavirus nsp12 at 0.5 mM	B	BAO_0000357	single protein format	SARS coronavirus					CHEMBL5118	Replicase polyprotein 1ab	SARS coronavirus	SINGLE PROTEIN	CHEMBL1152146	1	Scientific Literature	Bioorg. Med. Chem. Lett.	2008
CHEMBL515912		0	274.32	0	3	4c	O=C1CSC(c2ccc(F)cc2)N1c1ccccn1	Inhibition	'<='	50	%				UO_0000187					FALSE	CHEMBL959057	Inhibition of SARS coronavirus nsp12 at 0.5 mM	B	BAO_0000357	single protein format	SARS coronavirus					CHEMBL5118	Replicase polyprotein 1ab	SARS coronavirus	SINGLE PROTEIN	CHEMBL1152146	1	Scientific Literature	Bioorg. Med. Chem. Lett.	2008
CHEMBL478987		0	492.72	0	4.53	A040437	CCN1/C(=C\C=c2/s/c(=C\c3sc4ccccc4[n+]3CC)n(CC)c2=O)Sc2ccccc21	IC50	'='	10000	nM	5			UO_0000065	10.15	0.21	0.47	17.17	FALSE	CHEMBL965235	Inhibition of SARS Coronavirus 3C-like protease expressed in Escherichia coli	B	BAO_0000019	assay format	SARS coronavirus					CHEMBL5118	Replicase polyprotein 1ab	SARS coronavirus	SINGLE PROTEIN	CHEMBL1137639	1	Scientific Literature	Antimicrob. Agents Chemother.	2007
CHEMBL478119		0	471.72	1	7.98	A38120	CCN1/C(=C\C=C\C2=C/C(=C/c3sc4ccccc4[n+]3CC)CC(C)C2)Sc2ccccc21	IC50	'='	2000	nM	5.7			UO_0000065	12.08	0.24	-2.28	80.04	FALSE	CHEMBL965235	Inhibition of SARS Coronavirus 3C-like protease expressed in Escherichia coli	B	BAO_0000019	assay format	SARS coronavirus					CHEMBL5118	Replicase polyprotein 1ab	SARS coronavirus	SINGLE PROTEIN	CHEMBL1137639	1	Scientific Literature	Antimicrob. Agents Chemother.	2007
CHEMBL556501		0	314.25	0	2.31	3b	O=c1c(O)c(-c2ccc3c(c2)OCO3)oc2cc(O)cc(O)c12	IC50	'>'	50000	nM				UO_0000065					FALSE	CHEMBL1057306	Inhibition of SARS coronavirus helicase assessed as duplex-DNA unwinding by FRET based assay	B	BAO_0000357	single protein format	SARS coronavirus					CHEMBL5118	Replicase polyprotein 1ab	SARS coronavirus	SINGLE PROTEIN	CHEMBL1153502	1	Scientific Literature	Bioorg. Med. Chem. Lett.	2009
CHEMBL390122		0	470.3	1	6.25	4l	O=C1CSC(c2c(Cl)cccc2Cl)N1c1nc(-c2ccccc2)cc(C(F)(F)F)n1	Inhibition	'<='	50	%				UO_0000187					FALSE	CHEMBL959057	Inhibition of SARS coronavirus nsp12 at 0.5 mM	B	BAO_0000357	single protein format	SARS coronavirus					CHEMBL5118	Replicase polyprotein 1ab	SARS coronavirus	SINGLE PROTEIN	CHEMBL1152146	1	Scientific Literature	Bioorg. Med. Chem. Lett.	2008
CHEMBL488268		0	347.44	0	4.23	4d	Cc1cccc(N2C(=O)CSC2c2ccc(-c3cccnc3)cc2)n1	Inhibition	'<='	50	%				UO_0000187					FALSE	CHEMBL959057	Inhibition of SARS coronavirus nsp12 at 0.5 mM	B	BAO_0000357	single protein format	SARS coronavirus					CHEMBL5118	Replicase polyprotein 1ab	SARS coronavirus	SINGLE PROTEIN	CHEMBL1152146	1	Scientific Literature	Bioorg. Med. Chem. Lett.	2008
CHEMBL508525		0	444.43	0	4.4	9	O=C(NN1C(=O)CSC1c1ccccc1F)c1cc(-c2ccc(F)cc2F)ccc1O	Inhibition	'<='	50	%				UO_0000187					FALSE	CHEMBL959057	Inhibition of SARS coronavirus nsp12 at 0.5 mM	B	BAO_0000357	single protein format	SARS coronavirus					CHEMBL5118	Replicase polyprotein 1ab	SARS coronavirus	SINGLE PROTEIN	CHEMBL1152146	1	Scientific Literature	Bioorg. Med. Chem. Lett.	2008
CHEMBL389909		0	399.88	1	5.02	4k	Cc1cc(-c2ccccc2)nc(N2C(=O)CSC2c2c(F)cccc2Cl)n1	Inhibition	'<='	50	%				UO_0000187					FALSE	CHEMBL959057	Inhibition of SARS coronavirus nsp12 at 0.5 mM	B	BAO_0000357	single protein format	SARS coronavirus					CHEMBL5118	Replicase polyprotein 1ab	SARS coronavirus	SINGLE PROTEIN	CHEMBL1152146	1	Scientific Literature	Bioorg. Med. Chem. Lett.	2008
CHEMBL502385		0	342.25	0	4.75	6	O=C1CCSC(c2c(Cl)cccc2Cl)N1Cc1ccco1	Inhibition	'<='	50	%				UO_0000187					FALSE	CHEMBL959057	Inhibition of SARS coronavirus nsp12 at 0.5 mM	B	BAO_0000357	single protein format	SARS coronavirus					CHEMBL5118	Replicase polyprotein 1ab	SARS coronavirus	SINGLE PROTEIN	CHEMBL1152146	1	Scientific Literature	Bioorg. Med. Chem. Lett.	2008
CHEMBL226271		0	391.78	0	4.37	4h	Cc1cc(C(F)(F)F)nc(N2C(=O)CSC2c2c(F)cccc2Cl)n1	Inhibition	'<='	50	%				UO_0000187					FALSE	CHEMBL959057	Inhibition of SARS coronavirus nsp12 at 0.5 mM	B	BAO_0000357	single protein format	SARS coronavirus					CHEMBL5118	Replicase polyprotein 1ab	SARS coronavirus	SINGLE PROTEIN	CHEMBL1152146	1	Scientific Literature	Bioorg. Med. Chem. Lett.	2008
CHEMBL519424		0	433.19	1	5.05	4r	O=C1CSC(c2c(Br)cccc2Br)N1Cc1cccs1	Inhibition	'<='	50	%				UO_0000187					FALSE	CHEMBL959057	Inhibition of SARS coronavirus nsp12 at 0.5 mM	B	BAO_0000357	single protein format	SARS coronavirus					CHEMBL5118	Replicase polyprotein 1ab	SARS coronavirus	SINGLE PROTEIN	CHEMBL1152146	1	Scientific Literature	Bioorg. Med. Chem. Lett.	2008
CHEMBL551334		0	438.82	0	4.83	4d	O=c1c(O)c(-c2ccc3c(c2)OCO3)oc2cc(OCc3ccc(Cl)cc3)cc(O)c12	IC50	'>'	50000	nM				UO_0000065					FALSE	CHEMBL1055727	Inhibition of ATPase activity of SARS coronavirus helicase assessed as phosphate release by malachite green assay	B	BAO_0000357	single protein format	SARS coronavirus					CHEMBL5118	Replicase polyprotein 1ab	SARS coronavirus	SINGLE PROTEIN	CHEMBL1153502	1	Scientific Literature	Bioorg. Med. Chem. Lett.	2009
CHEMBL376553		0	461.95	1	6.38	4n	O=C1CSC(c2c(F)cccc2Cl)N1c1nc(-c2ccccc2)cc(-c2ccccc2)n1	Inhibition	'<='	50	%				UO_0000187					FALSE	CHEMBL959057	Inhibition of SARS coronavirus nsp12 at 0.5 mM	B	BAO_0000357	single protein format	SARS coronavirus					CHEMBL5118	Replicase polyprotein 1ab	SARS coronavirus	SINGLE PROTEIN	CHEMBL1152146	1	Scientific Literature	Bioorg. Med. Chem. Lett.	2008
CHEMBL487069		0	358.83	0	4.81	4p	O=C1CSC(c2c(F)cccc2Cl)N1c1ccc2ccccc2n1	Inhibition	'<='	50	%				UO_0000187					FALSE	CHEMBL959057	Inhibition of SARS coronavirus nsp12 at 0.5 mM	B	BAO_0000357	single protein format	SARS coronavirus					CHEMBL5118	Replicase polyprotein 1ab	SARS coronavirus	SINGLE PROTEIN	CHEMBL1152146	1	Scientific Literature	Bioorg. Med. Chem. Lett.	2008
CHEMBL470324		0	299.4	0	2.93	4b	CN(C)c1ccc(C2SCC(=O)N2c2ccccn2)cc1	Inhibition	'<='	50	%				UO_0000187					FALSE	CHEMBL959057	Inhibition of SARS coronavirus nsp12 at 0.5 mM	B	BAO_0000357	single protein format	SARS coronavirus					CHEMBL5118	Replicase polyprotein 1ab	SARS coronavirus	SINGLE PROTEIN	CHEMBL1152146	1	Scientific Literature	Bioorg. Med. Chem. Lett.	2008
CHEMBL488445		0	339.25	0	4.16	4f	O=C1CSC(c2c(Cl)cccc2Cl)N1Cc1cccnc1	Inhibition	'<='	50	%				UO_0000187					FALSE	CHEMBL959057	Inhibition of SARS coronavirus nsp12 at 0.5 mM	B	BAO_0000357	single protein format	SARS coronavirus					CHEMBL5118	Replicase polyprotein 1ab	SARS coronavirus	SINGLE PROTEIN	CHEMBL1152146	1	Scientific Literature	Bioorg. Med. Chem. Lett.	2008
CHEMBL488059		0	497.13	1	5.11	4i	Cc1cc(C(F)(F)F)nc(N2C(=O)CSC2c2c(Br)cccc2Br)n1	Inhibition	'<='	50	%				UO_0000187					FALSE	CHEMBL959057	Inhibition of SARS coronavirus nsp12 at 0.5 mM	B	BAO_0000357	single protein format	SARS coronavirus					CHEMBL5118	Replicase polyprotein 1ab	SARS coronavirus	SINGLE PROTEIN	CHEMBL1152146	1	Scientific Literature	Bioorg. Med. Chem. Lett.	2008
CHEMBL508791	DIECKOL	0	742.55	4	7.62	8	Oc1cc(O)cc(Oc2c(O)cc(O)c3c2Oc2c(O)cc(Oc4c(O)cc(Oc5c(O)cc(O)c6c5Oc5c(O)cc(O)cc5O6)cc4O)cc2O3)c1	Kd	'='	10300	nM	4.99			UO_0000065	6.72	0.13	-2.63	1.74	FALSE	CHEMBL2394460	Binding affinity to SARS coronavirus 3C-like protease by SPR analysis	B	BAO_0000019	assay format	SARS coronavirus					CHEMBL5118	Replicase polyprotein 1ab	SARS coronavirus	SINGLE PROTEIN	CHEMBL2390950	1	Scientific Literature	Bioorg. Med. Chem.	2013
CHEMBL540403		0	553.2	2	8.81	A05175	CCN1C(c2ccccc2)=C(c2ccccc2)S/C1=C/C=C/c1sc2c3ccccc3ccc2[n+]1CC.[Cl-]	IC50	'='	3800	nM	5.42			UO_0000065	10.47	0.2	-3.39	76.13	FALSE	CHEMBL965235	Inhibition of SARS Coronavirus 3C-like protease expressed in Escherichia coli	B	BAO_0000019	assay format	SARS coronavirus					CHEMBL5118	Replicase polyprotein 1ab	SARS coronavirus	SINGLE PROTEIN	CHEMBL1137639	1	Scientific Literature	Antimicrob. Agents Chemother.	2007
CHEMBL555221		0	615.8	1	3.94	14b	CCN(CC)C(=O)CC[C@H](NC(=O)[C@H](CC(C)C)NC(=O)[C@@H](NC(=O)OCc1ccccc1)C(C)C)C(=O)c1nccs1	Ki	'='	112000	nM		Outside typical range		UO_0000065					FALSE	CHEMBL1027049	Inhibition of SARS coronavirus 3CL protease pretreated for 10 mins before substrate addition	B	BAO_0000019	assay format	SARS coronavirus					CHEMBL5118	Replicase polyprotein 1ab	SARS coronavirus	SINGLE PROTEIN	CHEMBL1151865	1	Scientific Literature	Bioorg. Med. Chem. Lett.	2009
CHEMBL1277782		0	324.38	0	4.52	2a	O=C1/C(=C\c2ccccc2)C(c2ccccc2)=NN1c1ccccc1	Inhibition						Not Active						FALSE	CHEMBL1285498	Inhibition of SARS coronavirus 3C-like protease at 50 uM by fluorescence plate reader analysis	B	BAO_0000019	assay format	SARS coronavirus					CHEMBL5118	Replicase polyprotein 1ab	SARS coronavirus	SINGLE PROTEIN	CHEMBL1275368	1	Scientific Literature	Bioorg. Med. Chem.	2010
CHEMBL1276870		0	374.83	0	4.88	2l	O=C1/C(=C\c2ccc(O)cc2)C(c2ccccc2)=NN1c1ccc(Cl)cc1	Inhibition						Not Active						FALSE	CHEMBL1285498	Inhibition of SARS coronavirus 3C-like protease at 50 uM by fluorescence plate reader analysis	B	BAO_0000019	assay format	SARS coronavirus					CHEMBL5118	Replicase polyprotein 1ab	SARS coronavirus	SINGLE PROTEIN	CHEMBL1275368	1	Scientific Literature	Bioorg. Med. Chem.	2010
CHEMBL549646		0	331.75	0	3.15	2a	O=c1cc(CNCc2ccc(Cl)cc2)oc2ccc(O)c(O)c12	IC50	'>'	50000	nM				UO_0000065					FALSE	CHEMBL1055727	Inhibition of ATPase activity of SARS coronavirus helicase assessed as phosphate release by malachite green assay	B	BAO_0000357	single protein format	SARS coronavirus					CHEMBL5118	Replicase polyprotein 1ab	SARS coronavirus	SINGLE PROTEIN	CHEMBL1153502	1	Scientific Literature	Bioorg. Med. Chem. Lett.	2009
CHEMBL560392		0	322.32	0	2.37	2c	N#Cc1cccc(CNCc2cc(=O)c3c(O)c(O)ccc3o2)c1	IC50	'>'	50000	nM				UO_0000065					FALSE	CHEMBL1055727	Inhibition of ATPase activity of SARS coronavirus helicase assessed as phosphate release by malachite green assay	B	BAO_0000357	single protein format	SARS coronavirus					CHEMBL5118	Replicase polyprotein 1ab	SARS coronavirus	SINGLE PROTEIN	CHEMBL1153502	1	Scientific Literature	Bioorg. Med. Chem. Lett.	2009
CHEMBL559870	DIOXINODEHYDROECKOL	0	370.27	0	4.32	4	Oc1cc(O)c2oc3cc(O)c4oc5cc(O)cc(O)c5oc4c3oc2c1	Inhibition						Dose-dependent effect						FALSE	CHEMBL2395056	Inhibition of C-terminal His6-tagged recombinant SARS coronavirus 3C-like protease trans-cleavage activity expressed in Escherichia coli BL21 (DE3) using Dabcyl-KTSAVLQSGFRKME as substrate after 60 mins by FRET assay	B	BAO_0000019	assay format	SARS coronavirus					CHEMBL5118	Replicase polyprotein 1ab	SARS coronavirus	SINGLE PROTEIN	CHEMBL2390950	1	Scientific Literature	Bioorg. Med. Chem.	2013
CHEMBL456228		0	496.38	2	4.81	6	Oc1cc(O)cc(Oc2c(O)cc(O)c3c2Oc2c(O)cc(Oc4c(O)cc(O)cc4O)cc2O3)c1	IC50	'='	112000	nM		Outside typical range		UO_0000065					FALSE	CHEMBL2394462	Inhibition of SARS coronavirus 3C-like protease cis-cleavage activity transfected in african green monkey Vero cells using SAVLQSGFRK as substrate after 5 hrs by luciferase reporter gene assay	B	BAO_0000219	cell-based format	SARS coronavirus			Vero		CHEMBL5118	Replicase polyprotein 1ab	SARS coronavirus	SINGLE PROTEIN	CHEMBL2390950	1	Scientific Literature	Bioorg. Med. Chem.	2013	CHEMBL3307520
CHEMBL508791	DIECKOL	0	742.55	4	7.62	8	Oc1cc(O)cc(Oc2c(O)cc(O)c3c2Oc2c(O)cc(Oc4c(O)cc(Oc5c(O)cc(O)c6c5Oc5c(O)cc(O)cc5O6)cc4O)cc2O3)c1	IC50	'='	68100	nM	4.17			UO_0000065	5.61	0.11	-3.45	1.45	FALSE	CHEMBL2394462	Inhibition of SARS coronavirus 3C-like protease cis-cleavage activity transfected in african green monkey Vero cells using SAVLQSGFRK as substrate after 5 hrs by luciferase reporter gene assay	B	BAO_0000219	cell-based format	SARS coronavirus			Vero		CHEMBL5118	Replicase polyprotein 1ab	SARS coronavirus	SINGLE PROTEIN	CHEMBL2390950	1	Scientific Literature	Bioorg. Med. Chem.	2013	CHEMBL3307520
CHEMBL551131		0	417.37	0	3.73	4c	N#Cc1cccc(COc2cc(O)c3c(=O)c(O)c(-c4ccc(O)c(O)c4)oc3c2)c1	IC50	'='	25400	nM	4.59			UO_0000065	11.01	0.2	0.87	3.19	FALSE	CHEMBL1055727	Inhibition of ATPase activity of SARS coronavirus helicase assessed as phosphate release by malachite green assay	B	BAO_0000357	single protein format	SARS coronavirus					CHEMBL5118	Replicase polyprotein 1ab	SARS coronavirus	SINGLE PROTEIN	CHEMBL1153502	1	Scientific Literature	Bioorg. Med. Chem. Lett.	2009
CHEMBL492769		0	332.74	0	3.63	2	O=C(O)/C(O)=C/C(=O)c1ccc(OCc2ccc(Cl)cc2)cc1	IC50	'>'	50000	nM				UO_0000065					FALSE	CHEMBL964113	Inhibition of SCV helicase assessed as duplex-DNA unwinding by FRET based assay	B	BAO_0000357	single protein format	SARS coronavirus					CHEMBL5118	Replicase polyprotein 1ab	SARS coronavirus	SINGLE PROTEIN	CHEMBL1153308	1	Scientific Literature	Bioorg. Med. Chem. Lett.	2009
CHEMBL1092796	IGUESTERIN	0	404.59	1	7.16	4	CC1=CC[C@]2(C)CC[C@]3(C)C4=CC=C5C(=CC(=O)C(O)=C5C)[C@]4(C)CC[C@@]3(C)[C@@H]2C1	IC50	'='	2600	nM	5.58			UO_0000065	13.8	0.25	-1.57	14.97	FALSE	CHEMBL1113303	Inhibition of 3C-like protease of SARS coronavirus assessed as concentration of FRET peptide for 60 mins	B	BAO_0000019	assay format	SARS coronavirus					CHEMBL5118	Replicase polyprotein 1ab	SARS coronavirus	SINGLE PROTEIN	CHEMBL1155394	1	Scientific Literature	Bioorg. Med. Chem. Lett.	2010
CHEMBL151	LUTEOLIN	2	286.24	0	2.28	Luteolin	O=c1cc(-c2ccc(O)c(O)c2)oc2cc(O)cc(O)c12	IC50	'='	20000	nM	4.7			UO_0000065	16.42	0.31	2.42	4.23	FALSE	CHEMBL1286522	Inhibition of SARS coronavirus 3C-like protease after 60 mins by FRET assay	B	BAO_0000019	assay format	SARS coronavirus					CHEMBL5118	Replicase polyprotein 1ab	SARS coronavirus	SINGLE PROTEIN	CHEMBL1275337	1	Scientific Literature	Bioorg. Med. Chem.	2010
CHEMBL377324	GINKGETIN	0	566.52	2	5.74	11	COc1cc(O)c2c(=O)cc(-c3ccc(OC)c(-c4c(O)cc(O)c5c(=O)cc(-c6ccc(O)cc6)oc45)c3)oc2c1	Ki	'='	30200	nM	4.52			UO_0000065	7.98	0.15	-1.22	2.83	FALSE	CHEMBL1286520	Non-competitive inhibition of SARS coronavirus 3C-like protease by Dixon plot analysis	B	BAO_0000019	assay format	SARS coronavirus					CHEMBL5118	Replicase polyprotein 1ab	SARS coronavirus	SINGLE PROTEIN	CHEMBL1275337	1	Scientific Literature	Bioorg. Med. Chem.	2010
CHEMBL1277754		0	344.5	0	4.74	5	CC(=O)Oc1cc2c(cc1C(C)C)CC[C@@H]1[C@]2(C)CCC[C@@]1(C)CO	Inhibition	'='	78.6	%				UO_0000187					FALSE	CHEMBL1286521	Inhibition of SARS coronavirus 3C-like protease at 200 uM after 60 mins by FRET assay	B	BAO_0000019	assay format	SARS coronavirus					CHEMBL5118	Replicase polyprotein 1ab	SARS coronavirus	SINGLE PROTEIN	CHEMBL1275337	1	Scientific Literature	Bioorg. Med. Chem.	2010
CHEMBL1278125		0	402.84	0	4.87	2i	O=C(O)c1ccc(/C=C2\C(=O)N(c3ccc(Cl)cc3)N=C2c2ccccc2)cc1	IC50	'='	13900	nM	4.86			UO_0000065	12.06	0.23	-0.01	6.94	FALSE	CHEMBL1285497	Inhibition of SARS coronavirus 3C-like protease by fluorescence plate reader analysis	B	BAO_0000019	assay format	SARS coronavirus					CHEMBL5118	Replicase polyprotein 1ab	SARS coronavirus	SINGLE PROTEIN	CHEMBL1275368	1	Scientific Literature	Bioorg. Med. Chem.	2010
CHEMBL1277046		0	393.4	0	4.09	2p	N#Cc1ccc(N2N=C(c3ccccc3)/C(=C/c3ccc(C(=O)O)cc3)C2=O)cc1	IC50	'='	5500	nM	5.26			UO_0000065	13.37	0.24	1.17	5.61	FALSE	CHEMBL1285497	Inhibition of SARS coronavirus 3C-like protease by fluorescence plate reader analysis	B	BAO_0000019	assay format	SARS coronavirus					CHEMBL5118	Replicase polyprotein 1ab	SARS coronavirus	SINGLE PROTEIN	CHEMBL1275368	1	Scientific Literature	Bioorg. Med. Chem.	2010
CHEMBL1277136		0	437.28	1	5.53	2s	O=C(O)c1ccc(/C=C2\C(=O)N(c3ccc(Cl)c(Cl)c3)N=C2c2ccccc2)cc1	IC50	'='	24300	nM	4.61			UO_0000065	10.55	0.21	-0.92	6.59	FALSE	CHEMBL1285497	Inhibition of SARS coronavirus 3C-like protease by fluorescence plate reader analysis	B	BAO_0000019	assay format	SARS coronavirus					CHEMBL5118	Replicase polyprotein 1ab	SARS coronavirus	SINGLE PROTEIN	CHEMBL1275368	1	Scientific Literature	Bioorg. Med. Chem.	2010
CHEMBL1278213		0	388.85	1	5.18	2k	COc1ccc(/C=C2\C(=O)N(c3ccc(Cl)cc3)N=C2c2ccccc2)cc1	Inhibition						Not Active						FALSE	CHEMBL1285498	Inhibition of SARS coronavirus 3C-like protease at 50 uM by fluorescence plate reader analysis	B	BAO_0000019	assay format	SARS coronavirus					CHEMBL5118	Replicase polyprotein 1ab	SARS coronavirus	SINGLE PROTEIN	CHEMBL1275368	1	Scientific Literature	Bioorg. Med. Chem.	2010
CHEMBL1774326		0	495.63	0	3.96	5	O=C(CSc1ncnc2c1sc1nc(N3CCOCC3)c3c(c12)CCCC3)NCc1ccco1	Inhibition	'='	53.27	%				UO_0000187					FALSE	CHEMBL1777451	Inhibition of SARS coronavirus recombinant 3C-like protease expressed in Escherichia coli BL21(DE3) at 100 uM after 18 mins by FRET based assay	B	BAO_0000019	assay format	SARS coronavirus					CHEMBL5118	Replicase polyprotein 1ab	SARS coronavirus	SINGLE PROTEIN	CHEMBL1773021	1	Scientific Literature	Bioorg. Med. Chem. Lett.	2011
CHEMBL541163		0	667.35	2	10.25	A36638	CCN1/C(=C\C=C\c2sc3ccc(-c4nc5ccccc5s4)cc3[n+]2CC)Sc2ccc(-c3nc4ccccc4s3)cc21.[Cl-]	IC50	'='	2500	nM	5.6			UO_0000065	8.87	0.18	-4.65	17.03	FALSE	CHEMBL965235	Inhibition of SARS Coronavirus 3C-like protease expressed in Escherichia coli	B	BAO_0000019	assay format	SARS coronavirus					CHEMBL5118	Replicase polyprotein 1ab	SARS coronavirus	SINGLE PROTEIN	CHEMBL1137639	1	Scientific Literature	Antimicrob. Agents Chemother.	2007
CHEMBL1774325		0	445.48	0	3.33	4	COc1cc(/C=N/NC(=O)/C(=C\c2ccccc2)NC(=O)c2ccccc2)cc(OC)c1O	Inhibition	'='	56.11	%				UO_0000187					FALSE	CHEMBL1777451	Inhibition of SARS coronavirus recombinant 3C-like protease expressed in Escherichia coli BL21(DE3) at 100 uM after 18 mins by FRET based assay	B	BAO_0000019	assay format	SARS coronavirus					CHEMBL5118	Replicase polyprotein 1ab	SARS coronavirus	SINGLE PROTEIN	CHEMBL1773021	1	Scientific Literature	Bioorg. Med. Chem. Lett.	2011
CHEMBL1315054		0	476.53	0	4	7	Cc1ccc(C(=O)N/C(=C\c2ccc(-c3ccccc3[N+](=O)[O-])o2)C(=O)NCCCN(C)C)cc1	Ki	'='	9930	nM	5			UO_0000065	10.5	0.2	1	4.25	FALSE	CHEMBL1777510	Inhibition of SARS coronavirus recombinant 3C-like protease expressed in Escherichia coli BL21(DE3) by Lineweaver-Burk plot analysis	B	BAO_0000019	assay format	SARS coronavirus					CHEMBL5118	Replicase polyprotein 1ab	SARS coronavirus	SINGLE PROTEIN	CHEMBL1773021	1	Scientific Literature	Bioorg. Med. Chem. Lett.	2011
CHEMBL197310	18-HYDROXYFERRUGINOL	0	302.46	0	4.52	1	CC(C)c1cc2c(cc1O)[C@@]1(C)CCC[C@@](C)(CO)[C@@H]1CC2	Inhibition	'='	45.8	%				UO_0000187					FALSE	CHEMBL1286521	Inhibition of SARS coronavirus 3C-like protease at 200 uM after 60 mins by FRET assay	B	BAO_0000019	assay format	SARS coronavirus					CHEMBL5118	Replicase polyprotein 1ab	SARS coronavirus	SINGLE PROTEIN	CHEMBL1275337	1	Scientific Literature	Bioorg. Med. Chem.	2010
CHEMBL1277662	18-OXOFERRUGINOL	0	300.44	0	4.72	4	CC(C)c1cc2c(cc1O)[C@@]1(C)CCC[C@@](C)(C=O)[C@@H]1CC2	Inhibition	'='	70.5	%				UO_0000187					FALSE	CHEMBL1286521	Inhibition of SARS coronavirus 3C-like protease at 200 uM after 60 mins by FRET assay	B	BAO_0000019	assay format	SARS coronavirus					CHEMBL5118	Replicase polyprotein 1ab	SARS coronavirus	SINGLE PROTEIN	CHEMBL1275337	1	Scientific Literature	Bioorg. Med. Chem.	2010
CHEMBL377324	GINKGETIN	0	566.52	2	5.74	11	COc1cc(O)c2c(=O)cc(-c3ccc(OC)c(-c4c(O)cc(O)c5c(=O)cc(-c6ccc(O)cc6)oc45)c3)oc2c1	IC50	'='	32000	nM	4.5			UO_0000065	7.93	0.15	-1.25	2.81	FALSE	CHEMBL1286522	Inhibition of SARS coronavirus 3C-like protease after 60 mins by FRET assay	B	BAO_0000019	assay format	SARS coronavirus					CHEMBL5118	Replicase polyprotein 1ab	SARS coronavirus	SINGLE PROTEIN	CHEMBL1275337	1	Scientific Literature	Bioorg. Med. Chem.	2010
CHEMBL63354	AMENTOFLAVONE	0	538.46	3	5.13	9	O=c1cc(-c2ccc(O)c(-c3c(O)cc(O)c4c(=O)cc(-c5ccc(O)cc5)oc34)c2)oc2cc(O)cc(O)c12	Ki	'='	13800	nM	4.86			UO_0000065	9.03	0.17	-0.27	2.67	FALSE	CHEMBL1286520	Non-competitive inhibition of SARS coronavirus 3C-like protease by Dixon plot analysis	B	BAO_0000019	assay format	SARS coronavirus					CHEMBL5118	Replicase polyprotein 1ab	SARS coronavirus	SINGLE PROTEIN	CHEMBL1275337	1	Scientific Literature	Bioorg. Med. Chem.	2010
CHEMBL539209		0	585.73	1	2.82	21	CC(C)C[C@H](NC(=O)[C@@H](NC(=O)OCc1ccccc1)C(C)C)C(=O)N[C@@H](C[C@@H]1CCNC1=O)C(=O)c1nccs1	Ki	'='	2200	nM	5.66			UO_0000065	9.66	0.19	2.84	3.64	FALSE	CHEMBL1027049	Inhibition of SARS coronavirus 3CL protease pretreated for 10 mins before substrate addition	B	BAO_0000019	assay format	SARS coronavirus					CHEMBL5118	Replicase polyprotein 1ab	SARS coronavirus	SINGLE PROTEIN	CHEMBL1151865	1	Scientific Literature	Bioorg. Med. Chem. Lett.	2009
CHEMBL492771		0	332.74	0	3.63	4	O=C(O)/C(O)=C/C(=O)c1cccc(OCc2ccc(Cl)cc2)c1	IC50	'='	13600	nM	4.87			UO_0000065	14.63	0.29	1.24	5.81	FALSE	CHEMBL964113	Inhibition of SCV helicase assessed as duplex-DNA unwinding by FRET based assay	B	BAO_0000357	single protein format	SARS coronavirus					CHEMBL5118	Replicase polyprotein 1ab	SARS coronavirus	SINGLE PROTEIN	CHEMBL1153308	1	Scientific Literature	Bioorg. Med. Chem. Lett.	2009
CHEMBL551130		0	426.81	0	4.51	4b	O=c1c(O)c(-c2ccc(O)c(O)c2)oc2cc(OCc3cccc(Cl)c3)cc(O)c12	IC50	'>'	50000	nM				UO_0000065					FALSE	CHEMBL1055727	Inhibition of ATPase activity of SARS coronavirus helicase assessed as phosphate release by malachite green assay	B	BAO_0000357	single protein format	SARS coronavirus					CHEMBL5118	Replicase polyprotein 1ab	SARS coronavirus	SINGLE PROTEIN	CHEMBL1153502	1	Scientific Literature	Bioorg. Med. Chem. Lett.	2009
CHEMBL539208		0	628.73	1	4.51	8a	CCCN(CCC)C(=O)CC[C@H](NC(=O)[C@H](CC(C)C)NC(=O)[C@@H](NC(=O)OCc1ccccc1)C(C)C)C(=O)C(F)(F)F	Ki	'='	363000	nM		Outside typical range		UO_0000065					FALSE	CHEMBL1027049	Inhibition of SARS coronavirus 3CL protease pretreated for 10 mins before substrate addition	B	BAO_0000019	assay format	SARS coronavirus					CHEMBL5118	Replicase polyprotein 1ab	SARS coronavirus	SINGLE PROTEIN	CHEMBL1151865	1	Scientific Literature	Bioorg. Med. Chem. Lett.	2009
CHEMBL3099536		0	419.89	0	1.98	7d	O=C1Nc2ccc(S(=O)(=O)N3CCN(Cc4cccc(Cl)c4)CC3)cc2C1=O	IC50	'='	31710	nM	4.5			UO_0000065	10.71	0.22	2.52	5.18	FALSE	CHEMBL3102681	Inhibition of GST-tagged SARS coronavirus 3C-like protease by FRET assay	B	BAO_0000019	assay format	SARS coronavirus					CHEMBL5118	Replicase polyprotein 1ab	SARS coronavirus	SINGLE PROTEIN	CHEMBL3098093	1	Scientific Literature	Bioorg. Med. Chem.	2014
CHEMBL3099531		0	189.17	0	1.02	3h	CC(=O)c1ccc2c(c1)C(=O)C(=O)N2	Inhibition	'='	95.37	%				UO_0000187					FALSE	CHEMBL3102682	Inhibition of GST-tagged SARS coronavirus 3C-like protease at 1 mM by FRET assay	B	BAO_0000019	assay format	SARS coronavirus					CHEMBL5118	Replicase polyprotein 1ab	SARS coronavirus	SINGLE PROTEIN	CHEMBL3098093	1	Scientific Literature	Bioorg. Med. Chem.	2014
CHEMBL492770		0	298.29	0	2.97	3	O=C(O)/C(O)=C/C(=O)c1cccc(OCc2ccccc2)c1	IC50	'>'	50000	nM				UO_0000065					FALSE	CHEMBL964112	Inhibition of ATPase activity of SCV helicase assessed as phosphate release by colorimetric assay	B	BAO_0000357	single protein format	SARS coronavirus					CHEMBL5118	Replicase polyprotein 1ab	SARS coronavirus	SINGLE PROTEIN	CHEMBL1153308	1	Scientific Literature	Bioorg. Med. Chem. Lett.	2009
CHEMBL492571		0	297.31	0	3.01	7	O=C(O)/C(O)=C/C(=O)c1cccc(NCc2ccccc2)c1	IC50	'='	5400	nM	5.27			UO_0000065	17.72	0.33	2.26	6.08	FALSE	CHEMBL964113	Inhibition of SCV helicase assessed as duplex-DNA unwinding by FRET based assay	B	BAO_0000357	single protein format	SARS coronavirus					CHEMBL5118	Replicase polyprotein 1ab	SARS coronavirus	SINGLE PROTEIN	CHEMBL1153308	1	Scientific Literature	Bioorg. Med. Chem. Lett.	2009
CHEMBL492571		0	297.31	0	3.01	7	O=C(O)/C(O)=C/C(=O)c1cccc(NCc2ccccc2)c1	IC50	'>'	50000	nM				UO_0000065					FALSE	CHEMBL964112	Inhibition of ATPase activity of SCV helicase assessed as phosphate release by colorimetric assay	B	BAO_0000357	single protein format	SARS coronavirus					CHEMBL5118	Replicase polyprotein 1ab	SARS coronavirus	SINGLE PROTEIN	CHEMBL1153308	1	Scientific Literature	Bioorg. Med. Chem. Lett.	2009
CHEMBL1487869		0	285.73	0	3.48	9, BAS05022400	Cn1cnc2cc(NC(=O)c3ccc(Cl)cc3)ccc21	IC50	'='	18200	nM	4.74			UO_0000065	16.59	0.32	1.26	10.1	FALSE	CHEMBL3107833	Inhibition of SARS coronavirus 3C-like protease using 5-FAM-TSATLQSGFRK(QXL520)-NH2 as substrate	B	BAO_0000019	assay format	SARS coronavirus					CHEMBL5118	Replicase polyprotein 1ab	SARS coronavirus	SINGLE PROTEIN	CHEMBL3102752	1	Scientific Literature	Bioorg. Med. Chem.	2014
CHEMBL554041	ALEXIDINE DIHYDROCHLORIDE	0	581.73	2	4.26	10, Prestw-777	CCCCC(CC)CNC(=N)NC(=N)NCCCCCCNC(=N)NC(=N)NCC(CC)CCCC.Cl.Cl	IC50	'='	17800	nM	4.75			UO_0000065	9.33	0.18	0.49	2.83	FALSE	CHEMBL3107396	Inhibition of SARS coronavirus 3C-like protease using 5-FAM-TSATLQSGFRK(QXL520)-NH2 as substrate preincubated for 5 mins followed by substrate addition measured after 6 mins by FRET assay in presence of GSH	B	BAO_0000019	assay format	SARS coronavirus					CHEMBL5118	Replicase polyprotein 1ab	SARS coronavirus	SINGLE PROTEIN	CHEMBL3102752	1	Scientific Literature	Bioorg. Med. Chem.	2014
CHEMBL1092796	IGUESTERIN	0	404.59	1	7.16	4	CC1=CC[C@]2(C)CC[C@]3(C)C4=CC=C5C(=CC(=O)C(O)=C5C)[C@]4(C)CC[C@@]3(C)[C@@H]2C1	Ki	'='	800	nM	6.1			UO_0000065	15.07	0.28	-1.06	16.35	FALSE	CHEMBL1113304	Inhibition of 3C-like protease of SARS coronavirus assessed as concentration of FRET peptide for 60 mins by dixon plot	B	BAO_0000019	assay format	SARS coronavirus					CHEMBL5118	Replicase polyprotein 1ab	SARS coronavirus	SINGLE PROTEIN	CHEMBL1155394	1	Scientific Literature	Bioorg. Med. Chem. Lett.	2010
CHEMBL522710		0	331.75	0	3.66	8	O=C(O)/C(O)=C/C(=O)c1cccc(NCc2ccc(Cl)cc2)c1	IC50	'>'	50000	nM				UO_0000065					FALSE	CHEMBL964112	Inhibition of ATPase activity of SCV helicase assessed as phosphate release by colorimetric assay	B	BAO_0000357	single protein format	SARS coronavirus					CHEMBL5118	Replicase polyprotein 1ab	SARS coronavirus	SINGLE PROTEIN	CHEMBL1153308	1	Scientific Literature	Bioorg. Med. Chem. Lett.	2009
CHEMBL492772		0	332.74	0	3.63	6	O=C(O)/C(O)=C/C(=O)c1ccccc1OCc1ccc(Cl)cc1	IC50	'>'	50000	nM				UO_0000065					FALSE	CHEMBL964112	Inhibition of ATPase activity of SCV helicase assessed as phosphate release by colorimetric assay	B	BAO_0000357	single protein format	SARS coronavirus					CHEMBL5118	Replicase polyprotein 1ab	SARS coronavirus	SINGLE PROTEIN	CHEMBL1153308	1	Scientific Literature	Bioorg. Med. Chem. Lett.	2009
CHEMBL492772		0	332.74	0	3.63	6	O=C(O)/C(O)=C/C(=O)c1ccccc1OCc1ccc(Cl)cc1	IC50	'='	28700	nM	4.54			UO_0000065	13.65	0.27	0.91	5.42	FALSE	CHEMBL964113	Inhibition of SCV helicase assessed as duplex-DNA unwinding by FRET based assay	B	BAO_0000357	single protein format	SARS coronavirus					CHEMBL5118	Replicase polyprotein 1ab	SARS coronavirus	SINGLE PROTEIN	CHEMBL1153308	1	Scientific Literature	Bioorg. Med. Chem. Lett.	2009
CHEMBL1277228		0	413.39	0	4.13	2u	O=C(O)c1ccc(/C=C2\C(=O)N(c3cccc([N+](=O)[O-])c3)N=C2c2ccccc2)cc1	IC50	'='	8400	nM	5.08			UO_0000065	12.28	0.22	0.95	4.49	FALSE	CHEMBL1285497	Inhibition of SARS coronavirus 3C-like protease by fluorescence plate reader analysis	B	BAO_0000019	assay format	SARS coronavirus					CHEMBL5118	Replicase polyprotein 1ab	SARS coronavirus	SINGLE PROTEIN	CHEMBL1275368	1	Scientific Literature	Bioorg. Med. Chem.	2010
CHEMBL1276958		0	410.47	1	5.34	2n	CC(C)c1ccc(N2N=C(c3ccccc3)/C(=C/c3ccc(C(=O)O)cc3)C2=O)cc1	Inhibition						Not Active						FALSE	CHEMBL1285498	Inhibition of SARS coronavirus 3C-like protease at 50 uM by fluorescence plate reader analysis	B	BAO_0000019	assay format	SARS coronavirus					CHEMBL5118	Replicase polyprotein 1ab	SARS coronavirus	SINGLE PROTEIN	CHEMBL1275368	1	Scientific Literature	Bioorg. Med. Chem.	2010
CHEMBL1278212		0	415.88	1	5.13	2j	CC(=O)Nc1ccc(/C=C2\C(=O)N(c3ccc(Cl)cc3)N=C2c2ccccc2)cc1	Inhibition						Not Active						FALSE	CHEMBL1285498	Inhibition of SARS coronavirus 3C-like protease at 50 uM by fluorescence plate reader analysis	B	BAO_0000019	assay format	SARS coronavirus					CHEMBL5118	Replicase polyprotein 1ab	SARS coronavirus	SINGLE PROTEIN	CHEMBL1275368	1	Scientific Literature	Bioorg. Med. Chem.	2010
CHEMBL1278124		0	393.27	1	5.83	2h	O=C1/C(=C\c2ccc(Cl)cc2)C(c2ccccc2)=NN1c1ccc(Cl)cc1	Inhibition						Not Active						FALSE	CHEMBL1285498	Inhibition of SARS coronavirus 3C-like protease at 50 uM by fluorescence plate reader analysis	B	BAO_0000019	assay format	SARS coronavirus					CHEMBL5118	Replicase polyprotein 1ab	SARS coronavirus	SINGLE PROTEIN	CHEMBL1275368	1	Scientific Literature	Bioorg. Med. Chem.	2010
CHEMBL1277661	HINOKIOL	0	302.46	0	4.52	2	CC(C)c1cc2c(cc1O)[C@@]1(C)CC[C@H](O)C(C)(C)[C@@H]1CC2	Inhibition	'='	39.1	%				UO_0000187					FALSE	CHEMBL1286521	Inhibition of SARS coronavirus 3C-like protease at 200 uM after 60 mins by FRET assay	B	BAO_0000019	assay format	SARS coronavirus					CHEMBL5118	Replicase polyprotein 1ab	SARS coronavirus	SINGLE PROTEIN	CHEMBL1275337	1	Scientific Literature	Bioorg. Med. Chem.	2010
CHEMBL197310	18-HYDROXYFERRUGINOL	0	302.46	0	4.52	1	CC(C)c1cc2c(cc1O)[C@@]1(C)CCC[C@@](C)(CO)[C@@H]1CC2	IC50	'='	220800	nM		Outside typical range		UO_0000065					FALSE	CHEMBL1286522	Inhibition of SARS coronavirus 3C-like protease after 60 mins by FRET assay	B	BAO_0000019	assay format	SARS coronavirus					CHEMBL5118	Replicase polyprotein 1ab	SARS coronavirus	SINGLE PROTEIN	CHEMBL1275337	1	Scientific Literature	Bioorg. Med. Chem.	2010
CHEMBL28	APIGENIN	0	270.24	0	2.58	Apigenin	O=c1cc(-c2ccc(O)cc2)oc2cc(O)cc(O)c12	IC50	'='	280800	nM		Outside typical range		UO_0000065					FALSE	CHEMBL1286522	Inhibition of SARS coronavirus 3C-like protease after 60 mins by FRET assay	B	BAO_0000019	assay format	SARS coronavirus					CHEMBL5118	Replicase polyprotein 1ab	SARS coronavirus	SINGLE PROTEIN	CHEMBL1275337	1	Scientific Literature	Bioorg. Med. Chem.	2010
CHEMBL208908	SCIADOPITISIN	0	580.55	2	6.04	12	COc1ccc(-c2cc(=O)c3c(O)cc(O)c(-c4cc(-c5cc(=O)c6c(O)cc(OC)cc6o5)ccc4OC)c3o2)cc1	Ki	'='	35600	nM	4.45			UO_0000065	7.66	0.14	-1.59	2.99	FALSE	CHEMBL1286520	Non-competitive inhibition of SARS coronavirus 3C-like protease by Dixon plot analysis	B	BAO_0000019	assay format	SARS coronavirus					CHEMBL5118	Replicase polyprotein 1ab	SARS coronavirus	SINGLE PROTEIN	CHEMBL1275337	1	Scientific Literature	Bioorg. Med. Chem.	2010
CHEMBL115897		0	226.03	0	1.58	3a	O=C1Nc2ccc(Br)cc2C1=O	Inhibition	'='	90.54	%				UO_0000187					FALSE	CHEMBL3102682	Inhibition of GST-tagged SARS coronavirus 3C-like protease at 1 mM by FRET assay	B	BAO_0000019	assay format	SARS coronavirus					CHEMBL5118	Replicase polyprotein 1ab	SARS coronavirus	SINGLE PROTEIN	CHEMBL3098093	1	Scientific Literature	Bioorg. Med. Chem.	2014
CHEMBL554041	ALEXIDINE DIHYDROCHLORIDE	0	581.73	2	4.26	10, Prestw-777	CCCCC(CC)CNC(=N)NC(=N)NCCCCCCNC(=N)NC(=N)NCC(CC)CCCC.Cl.Cl	IC50	'='	25100	nM	4.6			UO_0000065	9.04	0.17	0.34	2.75	FALSE	CHEMBL3107833	Inhibition of SARS coronavirus 3C-like protease using 5-FAM-TSATLQSGFRK(QXL520)-NH2 as substrate	B	BAO_0000019	assay format	SARS coronavirus					CHEMBL5118	Replicase polyprotein 1ab	SARS coronavirus	SINGLE PROTEIN	CHEMBL3102752	1	Scientific Literature	Bioorg. Med. Chem.	2014
CHEMBL560933		0	438.82	0	4.83	4e	O=c1c(O)c(-c2ccc3c(c2)OCO3)oc2cc(OCc3cccc(Cl)c3)cc(O)c12	IC50	'='	15400	nM	4.81			UO_0000065	10.97	0.21	-0.02	4.89	FALSE	CHEMBL1057306	Inhibition of SARS coronavirus helicase assessed as duplex-DNA unwinding by FRET based assay	B	BAO_0000357	single protein format	SARS coronavirus					CHEMBL5118	Replicase polyprotein 1ab	SARS coronavirus	SINGLE PROTEIN	CHEMBL1153502	1	Scientific Literature	Bioorg. Med. Chem. Lett.	2009
CHEMBL3099539		0	389.39	0	0.56	7g	O=C1Nc2ccc(S(=O)(=O)N3CCN(C(=O)c4ccco4)CC3)cc2C1=O	IC50	'='	10070	nM	5			UO_0000065	12.83	0.25	4.44	4.27	FALSE	CHEMBL3102681	Inhibition of GST-tagged SARS coronavirus 3C-like protease by FRET assay	B	BAO_0000019	assay format	SARS coronavirus					CHEMBL5118	Replicase polyprotein 1ab	SARS coronavirus	SINGLE PROTEIN	CHEMBL3098093	1	Scientific Literature	Bioorg. Med. Chem.	2014
CHEMBL3099532		0	187.2	0	1.31	3i	O=C1Nc2cc3c(cc2C1=O)CCC3	Inhibition	'='	79.36	%				UO_0000187					FALSE	CHEMBL3102682	Inhibition of GST-tagged SARS coronavirus 3C-like protease at 1 mM by FRET assay	B	BAO_0000019	assay format	SARS coronavirus					CHEMBL5118	Replicase polyprotein 1ab	SARS coronavirus	SINGLE PROTEIN	CHEMBL3098093	1	Scientific Literature	Bioorg. Med. Chem.	2014
CHEMBL470323		0	383.48	1	5.08	4a	O=C1CSC(c2ccc(-c3ccnc4ccccc34)cc2)N1c1ccccn1	Inhibition	'<='	50	%				UO_0000187					FALSE	CHEMBL959057	Inhibition of SARS coronavirus nsp12 at 0.5 mM	B	BAO_0000357	single protein format	SARS coronavirus					CHEMBL5118	Replicase polyprotein 1ab	SARS coronavirus	SINGLE PROTEIN	CHEMBL1152146	1	Scientific Literature	Bioorg. Med. Chem. Lett.	2008
CHEMBL560933		0	438.82	0	4.83	4e	O=c1c(O)c(-c2ccc3c(c2)OCO3)oc2cc(OCc3cccc(Cl)c3)cc(O)c12	IC50	'>'	50000	nM				UO_0000065					FALSE	CHEMBL1055727	Inhibition of ATPase activity of SARS coronavirus helicase assessed as phosphate release by malachite green assay	B	BAO_0000357	single protein format	SARS coronavirus					CHEMBL5118	Replicase polyprotein 1ab	SARS coronavirus	SINGLE PROTEIN	CHEMBL1153502	1	Scientific Literature	Bioorg. Med. Chem. Lett.	2009
CHEMBL1732790		0	296.37	0	3.04	3, ZINC02488140	OCCCc1nc2ccccc2n1CCOc1ccccc1	IC50	'>'	200000	nM		Outside typical range		UO_0000065					FALSE	CHEMBL3107397	Inhibition of SARS coronavirus 3C-like protease using 5-FAM-TSATLQSGFRK(QXL520)-NH2 as substrate preincubated for 5 mins followed by substrate addition measured after 6 mins by FRET assay	B	BAO_0000019	assay format	SARS coronavirus					CHEMBL5118	Replicase polyprotein 1ab	SARS coronavirus	SINGLE PROTEIN	CHEMBL3102752	1	Scientific Literature	Bioorg. Med. Chem.	2014
CHEMBL1488602		0	278.35	0	1.62	4, ZINC02842242	COCCOCCn1c(CCCO)nc2ccccc21	IC50	'='	186000	nM		Outside typical range		UO_0000065					FALSE	CHEMBL3107396	Inhibition of SARS coronavirus 3C-like protease using 5-FAM-TSATLQSGFRK(QXL520)-NH2 as substrate preincubated for 5 mins followed by substrate addition measured after 6 mins by FRET assay in presence of GSH	B	BAO_0000019	assay format	SARS coronavirus					CHEMBL5118	Replicase polyprotein 1ab	SARS coronavirus	SINGLE PROTEIN	CHEMBL3102752	1	Scientific Literature	Bioorg. Med. Chem.	2014
CHEMBL3105071		0	348.42	0	1.68	5, ZINC02865958	COc1ccccc1CNC(=O)[C@H](C)NS(=O)(=O)c1ccccc1	IC50	'='	29900	nM	4.52			UO_0000065	12.99	0.26	2.84	5.35	FALSE	CHEMBL3107397	Inhibition of SARS coronavirus 3C-like protease using 5-FAM-TSATLQSGFRK(QXL520)-NH2 as substrate preincubated for 5 mins followed by substrate addition measured after 6 mins by FRET assay	B	BAO_0000019	assay format	SARS coronavirus					CHEMBL5118	Replicase polyprotein 1ab	SARS coronavirus	SINGLE PROTEIN	CHEMBL3102752	1	Scientific Literature	Bioorg. Med. Chem.	2014
CHEMBL541707		0	627.79	1	4.41	26	CC(C)C[C@H](NC(=O)[C@@H](NC(=O)OCc1ccccc1)C(C)C)C(=O)N[C@@H](CCC(=O)c1nccs1)C(=O)c1nccs1	Ki	'='	45200	nM	4.34			UO_0000065	6.92	0.14	-0.07	2.78	FALSE	CHEMBL1027049	Inhibition of SARS coronavirus 3CL protease pretreated for 10 mins before substrate addition	B	BAO_0000019	assay format	SARS coronavirus					CHEMBL5118	Replicase polyprotein 1ab	SARS coronavirus	SINGLE PROTEIN	CHEMBL1151865	1	Scientific Literature	Bioorg. Med. Chem. Lett.	2009
CHEMBL551569		0	545.56	1	2.95	1a	CC(C)C[C@H](NC(=O)[C@@H](NC(=O)OCc1ccccc1)C(C)C)C(=O)N[C@@H](CCC(=O)O)C(=O)C(F)(F)F	Ki	'='	116000	nM		Outside typical range		UO_0000065					FALSE	CHEMBL1027049	Inhibition of SARS coronavirus 3CL protease pretreated for 10 mins before substrate addition	B	BAO_0000019	assay format	SARS coronavirus					CHEMBL5118	Replicase polyprotein 1ab	SARS coronavirus	SINGLE PROTEIN	CHEMBL1151865	1	Scientific Literature	Bioorg. Med. Chem. Lett.	2009
CHEMBL555220		0	648.72	1	4.52	8c	CC(C)C[C@H](NC(=O)[C@@H](NC(=O)OCc1ccccc1)C(C)C)C(=O)N[C@@H](CCC(=O)N(C)Cc1ccccc1)C(=O)C(F)(F)F	Ki	'='	34100	nM	4.47			UO_0000065	6.89	0.13	-0.05	3.34	FALSE	CHEMBL1027049	Inhibition of SARS coronavirus 3CL protease pretreated for 10 mins before substrate addition	B	BAO_0000019	assay format	SARS coronavirus					CHEMBL5118	Replicase polyprotein 1ab	SARS coronavirus	SINGLE PROTEIN	CHEMBL1151865	1	Scientific Literature	Bioorg. Med. Chem. Lett.	2009
CHEMBL538957		0	665.86	2	5.09	14e	CCN(CC)C(=O)CC[C@H](NC(=O)[C@H](CC(C)C)NC(=O)[C@@H](NC(=O)OCc1ccccc1)C(C)C)C(=O)c1nc2ccccc2s1	Ki	'='	49300	nM	4.31			UO_0000065	6.47	0.13	-0.78	2.93	FALSE	CHEMBL1027049	Inhibition of SARS coronavirus 3CL protease pretreated for 10 mins before substrate addition	B	BAO_0000019	assay format	SARS coronavirus					CHEMBL5118	Replicase polyprotein 1ab	SARS coronavirus	SINGLE PROTEIN	CHEMBL1151865	1	Scientific Literature	Bioorg. Med. Chem. Lett.	2009
CHEMBL488250		0	339.25	0	4.56	5a	CC1SC(c2c(Cl)cccc2Cl)N(c2ccccn2)C1=O	Inhibition	'<='	50	%				UO_0000187					FALSE	CHEMBL959057	Inhibition of SARS coronavirus nsp12 at 0.5 mM	B	BAO_0000357	single protein format	SARS coronavirus					CHEMBL5118	Replicase polyprotein 1ab	SARS coronavirus	SINGLE PROTEIN	CHEMBL1152146	1	Scientific Literature	Bioorg. Med. Chem. Lett.	2008
CHEMBL432519	TINGENONE	0	420.59	1	6.42	3	CC1=C(O)C(=O)C=C2C1=CC=C1[C@@]3(C)CC[C@@]4(C)CC(=O)[C@H](C)C[C@H]4[C@]3(C)CC[C@@]21C	Ki	'='	4000	nM	5.4			UO_0000065	12.83	0.24	-1.02	9.93	FALSE	CHEMBL1113304	Inhibition of 3C-like protease of SARS coronavirus assessed as concentration of FRET peptide for 60 mins by dixon plot	B	BAO_0000019	assay format	SARS coronavirus					CHEMBL5118	Replicase polyprotein 1ab	SARS coronavirus	SINGLE PROTEIN	CHEMBL1155394	1	Scientific Literature	Bioorg. Med. Chem. Lett.	2010
CHEMBL3099525		0	436.49	0	2.59	8j3	O=C1C(=O)N(Cc2ccc3ccccc3c2)c2ccc(S(=O)(=O)N3CCOCC3)cc21	IC50	'='	39870	nM	4.4			UO_0000065	10.08	0.19	1.81	5.24	FALSE	CHEMBL3102681	Inhibition of GST-tagged SARS coronavirus 3C-like protease by FRET assay	B	BAO_0000019	assay format	SARS coronavirus					CHEMBL5118	Replicase polyprotein 1ab	SARS coronavirus	SINGLE PROTEIN	CHEMBL3098093	1	Scientific Literature	Bioorg. Med. Chem.	2014
CHEMBL3099545		0	399.47	0	1.35	8a2	CN1CCN(S(=O)(=O)c2ccc3c(c2)C(=O)C(=O)N3Cc2ccccc2)CC1	IC50	'='	67200	nM	4.17			UO_0000065	10.45	0.2	2.82	5.35	FALSE	CHEMBL3102681	Inhibition of GST-tagged SARS coronavirus 3C-like protease by FRET assay	B	BAO_0000019	assay format	SARS coronavirus					CHEMBL5118	Replicase polyprotein 1ab	SARS coronavirus	SINGLE PROTEIN	CHEMBL3098093	1	Scientific Literature	Bioorg. Med. Chem.	2014
CHEMBL3099535		0	439.42	0	2.35	7c	O=C1Nc2ccc(S(=O)(=O)N3CCN(c4cccc(C(F)(F)F)c4)CC3)cc2C1=O	IC50	'>'	100000	nM				UO_0000065					FALSE	CHEMBL3102681	Inhibition of GST-tagged SARS coronavirus 3C-like protease by FRET assay	B	BAO_0000019	assay format	SARS coronavirus					CHEMBL5118	Replicase polyprotein 1ab	SARS coronavirus	SINGLE PROTEIN	CHEMBL3098093	1	Scientific Literature	Bioorg. Med. Chem.	2014
CHEMBL2441745		0	685.82	1	3.31	6	CC(C)C[C@H](NC(=O)[C@H](Cc1cccc2ccccc12)NC(=O)OCc1ccccc1)C(=O)N[C@@H](C[C@@H]1CCNC1=O)C(=O)C(=O)NC(C)C	IC50	'='	610	nM	6.21			UO_0000065	9.06	0.17	2.9	3.62	FALSE	CHEMBL2445771	Inhibition of SARS coronavirus 3C-like protease by FRET assay	B	BAO_0000019	assay format	SARS coronavirus					CHEMBL5118	Replicase polyprotein 1ab	SARS coronavirus	SINGLE PROTEIN	CHEMBL2439984	1	Scientific Literature	Bioorg. Med. Chem. Lett.	2013
CHEMBL3099542		0	308.36	0	1.38	7l	CC1CCCCN1S(=O)(=O)c1ccc2c(c1)C(=O)C(=O)N2	IC50	'='	2250	nM	5.65			UO_0000065	18.32	0.37	4.27	6.76	FALSE	CHEMBL3102681	Inhibition of GST-tagged SARS coronavirus 3C-like protease by FRET assay	B	BAO_0000019	assay format	SARS coronavirus					CHEMBL5118	Replicase polyprotein 1ab	SARS coronavirus	SINGLE PROTEIN	CHEMBL3098093	1	Scientific Literature	Bioorg. Med. Chem.	2014
CHEMBL3099521		0	386.43	0	0.75	8h1	CN1C(=O)C(=O)c2cc(S(=O)(=O)N3CCN(c4ccccn4)CC3)ccc21	IC50	'='	5520	nM	5.26			UO_0000065	13.61	0.27	4.51	5.79	FALSE	CHEMBL3102681	Inhibition of GST-tagged SARS coronavirus 3C-like protease by FRET assay	B	BAO_0000019	assay format	SARS coronavirus					CHEMBL5118	Replicase polyprotein 1ab	SARS coronavirus	SINGLE PROTEIN	CHEMBL3098093	1	Scientific Literature	Bioorg. Med. Chem.	2014
CHEMBL1774322		0	415.55	1	5.42	1	Nc1nc(CSc2nnc(-c3cccc4ccccc34)n2-c2ccccc2)cs1	IC50	'='	58350	nM	4.23			UO_0000065	10.19	0.2	-1.19	6.08	FALSE	CHEMBL1777452	Inhibition of SARS coronavirus recombinant 3C-like protease expressed in Escherichia coli BL21(DE3) after 30 mins by FRET based assay	B	BAO_0000019	assay format	SARS coronavirus					CHEMBL5118	Replicase polyprotein 1ab	SARS coronavirus	SINGLE PROTEIN	CHEMBL1773021	1	Scientific Literature	Bioorg. Med. Chem. Lett.	2011
CHEMBL50	QUERCETIN	3	302.24	0	1.99	SID26752085	O=c1c(O)c(-c2ccc(O)c(O)c2)oc2cc(O)cc(O)c12	IC50	'>'	50000	nM				UO_0000065					FALSE	CHEMBL1055727	Inhibition of ATPase activity of SARS coronavirus helicase assessed as phosphate release by malachite green assay	B	BAO_0000357	single protein format	SARS coronavirus					CHEMBL5118	Replicase polyprotein 1ab	SARS coronavirus	SINGLE PROTEIN	CHEMBL1153502	1	Scientific Literature	Bioorg. Med. Chem. Lett.	2009
CHEMBL551131		0	417.37	0	3.73	4c	N#Cc1cccc(COc2cc(O)c3c(=O)c(O)c(-c4ccc(O)c(O)c4)oc3c2)c1	IC50	'='	2700	nM	5.57			UO_0000065	13.34	0.25	1.84	3.86	FALSE	CHEMBL1057306	Inhibition of SARS coronavirus helicase assessed as duplex-DNA unwinding by FRET based assay	B	BAO_0000357	single protein format	SARS coronavirus					CHEMBL5118	Replicase polyprotein 1ab	SARS coronavirus	SINGLE PROTEIN	CHEMBL1153502	1	Scientific Literature	Bioorg. Med. Chem. Lett.	2009
CHEMBL1277865		0	354.41	0	4.53	2b	COc1cccc(/C=C2\C(=O)N(c3ccccc3)N=C2c2ccccc2)c1	Inhibition						Not Active						FALSE	CHEMBL1285498	Inhibition of SARS coronavirus 3C-like protease at 50 uM by fluorescence plate reader analysis	B	BAO_0000019	assay format	SARS coronavirus					CHEMBL5118	Replicase polyprotein 1ab	SARS coronavirus	SINGLE PROTEIN	CHEMBL1275368	1	Scientific Literature	Bioorg. Med. Chem.	2010
CHEMBL551181		0	529.6	1	4.37	8e	CCCN(CCC)C(=O)CC[C@H](NC(=O)[C@H](CC(C)C)NC(=O)OCc1ccccc1)C(=O)C(F)(F)F	Ki	'='	584000	nM		Outside typical range		UO_0000065					FALSE	CHEMBL1027049	Inhibition of SARS coronavirus 3CL protease pretreated for 10 mins before substrate addition	B	BAO_0000019	assay format	SARS coronavirus					CHEMBL5118	Replicase polyprotein 1ab	SARS coronavirus	SINGLE PROTEIN	CHEMBL1151865	1	Scientific Literature	Bioorg. Med. Chem. Lett.	2009
CHEMBL518593		0	361.51	1	5.2	A041369	C(\C1=C2Sc3ccccc3N2CC1)=C1/CC[n+]2c1sc1ccccc12	IC50	'='	10500	nM	4.98			UO_0000065	13.77	0.27	-0.22	69.93	FALSE	CHEMBL965235	Inhibition of SARS Coronavirus 3C-like protease expressed in Escherichia coli	B	BAO_0000019	assay format	SARS coronavirus					CHEMBL5118	Replicase polyprotein 1ab	SARS coronavirus	SINGLE PROTEIN	CHEMBL1137639	1	Scientific Literature	Antimicrob. Agents Chemother.	2007
CHEMBL479172		0	471.72	1	8.25	A01652	CCC(=C\c1sc2c3ccccc3ccc2[n+]1CC)/C=C1/Sc2cc(C)c(C)cc2N1CC	IC50	'='	5400	nM	5.27			UO_0000065	11.17	0.22	-2.98	73.98	FALSE	CHEMBL965235	Inhibition of SARS Coronavirus 3C-like protease expressed in Escherichia coli	B	BAO_0000019	assay format	SARS coronavirus					CHEMBL5118	Replicase polyprotein 1ab	SARS coronavirus	SINGLE PROTEIN	CHEMBL1137639	1	Scientific Literature	Antimicrob. Agents Chemother.	2007
CHEMBL515787		0	518.68	1	4.59	A51894	CCN1/C(=C\C(=C/c2sc3ccccc3[n+]2CCCS(=O)(=O)[O-])OC)Sc2ccc(OC)cc21	IC50	'='	7300	nM	5.14			UO_0000065	9.9	0.21	0.55	6.21	FALSE	CHEMBL965235	Inhibition of SARS Coronavirus 3C-like protease expressed in Escherichia coli	B	BAO_0000019	assay format	SARS coronavirus					CHEMBL5118	Replicase polyprotein 1ab	SARS coronavirus	SINGLE PROTEIN	CHEMBL1137639	1	Scientific Literature	Antimicrob. Agents Chemother.	2007
CHEMBL3099537		0	475.52	0	1.35	7e	COc1cc(CN2CCN(S(=O)(=O)c3ccc4c(c3)C(=O)C(=O)N4)CC2)cc(OC)c1OC	IC50	'='	32080	nM	4.49			UO_0000065	9.45	0.19	3.14	3.93	FALSE	CHEMBL3102681	Inhibition of GST-tagged SARS coronavirus 3C-like protease by FRET assay	B	BAO_0000019	assay format	SARS coronavirus					CHEMBL5118	Replicase polyprotein 1ab	SARS coronavirus	SINGLE PROTEIN	CHEMBL3098093	1	Scientific Literature	Bioorg. Med. Chem.	2014
CHEMBL3099527		0	398.48	0	2.84	8k2	CC1CCN(S(=O)(=O)c2ccc3c(c2)C(=O)C(=O)N3Cc2ccccc2)CC1	IC50	'='	1690	nM	5.77			UO_0000065	14.49	0.28	2.93	7.72	FALSE	CHEMBL3102681	Inhibition of GST-tagged SARS coronavirus 3C-like protease by FRET assay	B	BAO_0000019	assay format	SARS coronavirus					CHEMBL5118	Replicase polyprotein 1ab	SARS coronavirus	SINGLE PROTEIN	CHEMBL3098093	1	Scientific Literature	Bioorg. Med. Chem.	2014
CHEMBL3099524		0	386.43	0	1.44	8j2	O=C1C(=O)N(Cc2ccccc2)c2ccc(S(=O)(=O)N3CCOCC3)cc21	IC50	'='	13860	nM	4.86			UO_0000065	12.57	0.25	3.42	5.78	FALSE	CHEMBL3102681	Inhibition of GST-tagged SARS coronavirus 3C-like protease by FRET assay	B	BAO_0000019	assay format	SARS coronavirus					CHEMBL5118	Replicase polyprotein 1ab	SARS coronavirus	SINGLE PROTEIN	CHEMBL3098093	1	Scientific Literature	Bioorg. Med. Chem.	2014
CHEMBL3099533		0	309.35	0	-0.24	7a	CN1CCN(S(=O)(=O)c2ccc3c(c2)C(=O)C(=O)N3)CC1	Inhibition	'='	98.64	%				UO_0000187					FALSE	CHEMBL3102682	Inhibition of GST-tagged SARS coronavirus 3C-like protease at 1 mM by FRET assay	B	BAO_0000019	assay format	SARS coronavirus					CHEMBL5118	Replicase polyprotein 1ab	SARS coronavirus	SINGLE PROTEIN	CHEMBL3098093	1	Scientific Literature	Bioorg. Med. Chem.	2014
CHEMBL3105072		0	334.29	0	3.23	7, ZINC01408189	Nc1ccc(F)c(S(=O)(=O)Nc2cccc(C(F)(F)F)c2)c1	IC50	'='	29800	nM	4.53			UO_0000065	13.54	0.28	1.3	6.27	FALSE	CHEMBL3107397	Inhibition of SARS coronavirus 3C-like protease using 5-FAM-TSATLQSGFRK(QXL520)-NH2 as substrate preincubated for 5 mins followed by substrate addition measured after 6 mins by FRET assay	B	BAO_0000019	assay format	SARS coronavirus					CHEMBL5118	Replicase polyprotein 1ab	SARS coronavirus	SINGLE PROTEIN	CHEMBL3102752	1	Scientific Literature	Bioorg. Med. Chem.	2014
CHEMBL3105076		0	203.13	0	0.95	14, F2124-0890	Nc1ncnc2[nH]c(C(F)(F)F)nc12	Kd	'='	21300	nM	4.67			UO_0000065	23	0.46	3.72	5.8	FALSE	CHEMBL3107393	Binding affinity to SARS coronavirus 3C-like protease using 5-FAM-TSATLQSGFRK(QXL520)-NH2 as substrate by SPR analysis	B	BAO_0000019	assay format	SARS coronavirus					CHEMBL5118	Replicase polyprotein 1ab	SARS coronavirus	SINGLE PROTEIN	CHEMBL3102752	1	Scientific Literature	Bioorg. Med. Chem.	2014
CHEMBL3105073		0	349.33	0	4.76	11, CD11546	S=C(NCc1cccnc1)SCc1cc(Cl)sc1Cl	Activity	'>'	50	%				UO_0000187					FALSE	CHEMBL3107390	Reversible inhibition of SARS coronavirus 3C-like protease using 5-FAM-TSATLQSGFRK(QXL520)-NH2 as substrate assessed as recovery rate at 20 x IC50 preincubated for 1 hr followed by compound washout by FRET assay in presence of GSH	B	BAO_0000019	assay format	SARS coronavirus					CHEMBL5118	Replicase polyprotein 1ab	SARS coronavirus	SINGLE PROTEIN	CHEMBL3102752	1	Scientific Literature	Bioorg. Med. Chem.	2014
CHEMBL1487869		0	285.73	0	3.48	9, BAS05022400	Cn1cnc2cc(NC(=O)c3ccc(Cl)cc3)ccc21	IC50	'='	30900	nM	4.51			UO_0000065	15.78	0.31	1.03	9.61	FALSE	CHEMBL3107396	Inhibition of SARS coronavirus 3C-like protease using 5-FAM-TSATLQSGFRK(QXL520)-NH2 as substrate preincubated for 5 mins followed by substrate addition measured after 6 mins by FRET assay in presence of GSH	B	BAO_0000019	assay format	SARS coronavirus					CHEMBL5118	Replicase polyprotein 1ab	SARS coronavirus	SINGLE PROTEIN	CHEMBL3102752	1	Scientific Literature	Bioorg. Med. Chem.	2014
CHEMBL1906723		0	325.37	0	2.33	1, ZINC01808425	COc1ccc(C(=O)Cn2c(NCCO)nc3ccccc32)cc1	IC50	'='	40900	nM	4.39			UO_0000065	13.49	0.25	2.06	5.75	FALSE	CHEMBL3107396	Inhibition of SARS coronavirus 3C-like protease using 5-FAM-TSATLQSGFRK(QXL520)-NH2 as substrate preincubated for 5 mins followed by substrate addition measured after 6 mins by FRET assay in presence of GSH	B	BAO_0000019	assay format	SARS coronavirus					CHEMBL5118	Replicase polyprotein 1ab	SARS coronavirus	SINGLE PROTEIN	CHEMBL3102752	1	Scientific Literature	Bioorg. Med. Chem.	2014
CHEMBL3105071		0	348.42	0	1.68	5, ZINC02865958	COc1ccccc1CNC(=O)[C@H](C)NS(=O)(=O)c1ccccc1	Inhibition						Not Active						FALSE	CHEMBL3107394	Inhibition of SARS coronavirus 3C-like protease using 5-FAM-TSATLQSGFRK(QXL520)-NH2 as substrate at 100 uM preincubated for 5 mins followed by substrate addition measured after 6 mins by FRET assay in presence of GSH relative to control	B	BAO_0000019	assay format	SARS coronavirus					CHEMBL5118	Replicase polyprotein 1ab	SARS coronavirus	SINGLE PROTEIN	CHEMBL3102752	1	Scientific Literature	Bioorg. Med. Chem.	2014
CHEMBL1478361		0	338.39	0	1.37	2, ZINC00331620	COc1ccc(N(CC(=O)NCc2ccco2)S(C)(=O)=O)cc1	Inhibition						Not Active						FALSE	CHEMBL3107394	Inhibition of SARS coronavirus 3C-like protease using 5-FAM-TSATLQSGFRK(QXL520)-NH2 as substrate at 100 uM preincubated for 5 mins followed by substrate addition measured after 6 mins by FRET assay in presence of GSH relative to control	B	BAO_0000019	assay format	SARS coronavirus					CHEMBL5118	Replicase polyprotein 1ab	SARS coronavirus	SINGLE PROTEIN	CHEMBL3102752	1	Scientific Literature	Bioorg. Med. Chem.	2014
CHEMBL3105071		0	348.42	0	1.68	5, ZINC02865958	COc1ccccc1CNC(=O)[C@H](C)NS(=O)(=O)c1ccccc1	Inhibition						Not Active						FALSE	CHEMBL3107395	Inhibition of SARS coronavirus 3C-like protease using 5-FAM-TSATLQSGFRK(QXL520)-NH2 as substrate at 100 uM preincubated for 5 mins followed by substrate addition measured after 6 mins by FRET assay relative to control	B	BAO_0000019	assay format	SARS coronavirus					CHEMBL5118	Replicase polyprotein 1ab	SARS coronavirus	SINGLE PROTEIN	CHEMBL3102752	1	Scientific Literature	Bioorg. Med. Chem.	2014
CHEMBL1732790		0	296.37	0	3.04	3, ZINC02488140	OCCCc1nc2ccccc2n1CCOc1ccccc1	Inhibition						Not Active						FALSE	CHEMBL3107395	Inhibition of SARS coronavirus 3C-like protease using 5-FAM-TSATLQSGFRK(QXL520)-NH2 as substrate at 100 uM preincubated for 5 mins followed by substrate addition measured after 6 mins by FRET assay relative to control	B	BAO_0000019	assay format	SARS coronavirus					CHEMBL5118	Replicase polyprotein 1ab	SARS coronavirus	SINGLE PROTEIN	CHEMBL3102752	1	Scientific Literature	Bioorg. Med. Chem.	2014
CHEMBL1478361		0	338.39	0	1.37	2, ZINC00331620	COc1ccc(N(CC(=O)NCc2ccco2)S(C)(=O)=O)cc1	IC50	'='	61900	nM	4.21			UO_0000065	12.44	0.25	2.84	4.74	FALSE	CHEMBL3107396	Inhibition of SARS coronavirus 3C-like protease using 5-FAM-TSATLQSGFRK(QXL520)-NH2 as substrate preincubated for 5 mins followed by substrate addition measured after 6 mins by FRET assay in presence of GSH	B	BAO_0000019	assay format	SARS coronavirus					CHEMBL5118	Replicase polyprotein 1ab	SARS coronavirus	SINGLE PROTEIN	CHEMBL3102752	1	Scientific Literature	Bioorg. Med. Chem.	2014
CHEMBL553172		0	615.65	1	1.85	1b	CC(C)C[C@H](NC(=O)[C@@H](NC(=O)[C@H](C)NC(=O)OCc1ccccc1)C(C)C)C(=O)N[C@@H](CCC(N)=O)C(=O)C(F)(F)F	Ki	'='	135000	nM		Outside typical range		UO_0000065					FALSE	CHEMBL1027049	Inhibition of SARS coronavirus 3CL protease pretreated for 10 mins before substrate addition	B	BAO_0000019	assay format	SARS coronavirus					CHEMBL5118	Replicase polyprotein 1ab	SARS coronavirus	SINGLE PROTEIN	CHEMBL1151865	1	Scientific Literature	Bioorg. Med. Chem. Lett.	2009
CHEMBL551504		0	516.66	1	3.8	14c	CCN(CC)C(=O)CC[C@H](NC(=O)[C@H](CC(C)C)NC(=O)OCc1ccccc1)C(=O)c1nccs1	Ki	'='	462000	nM		Outside typical range		UO_0000065					FALSE	CHEMBL1027049	Inhibition of SARS coronavirus 3CL protease pretreated for 10 mins before substrate addition	B	BAO_0000019	assay format	SARS coronavirus					CHEMBL5118	Replicase polyprotein 1ab	SARS coronavirus	SINGLE PROTEIN	CHEMBL1151865	1	Scientific Literature	Bioorg. Med. Chem. Lett.	2009
CHEMBL1277135		0	402.84	0	4.87	2r	O=C(O)c1ccc(/C=C2\C(=O)N(c3cccc(Cl)c3)N=C2c2ccccc2)cc1	IC50	'='	10800	nM	4.97			UO_0000065	12.33	0.23	0.1	7.1	FALSE	CHEMBL1285497	Inhibition of SARS coronavirus 3C-like protease by fluorescence plate reader analysis	B	BAO_0000019	assay format	SARS coronavirus					CHEMBL5118	Replicase polyprotein 1ab	SARS coronavirus	SINGLE PROTEIN	CHEMBL1275368	1	Scientific Literature	Bioorg. Med. Chem.	2010
CHEMBL1278030		0	369.38	0	4.43	2f	O=C1/C(=C\c2cccc([N+](=O)[O-])c2)C(c2ccccc2)=NN1c1ccccc1	Inhibition						Not Active						FALSE	CHEMBL1285498	Inhibition of SARS coronavirus 3C-like protease at 50 uM by fluorescence plate reader analysis	B	BAO_0000019	assay format	SARS coronavirus					CHEMBL5118	Replicase polyprotein 1ab	SARS coronavirus	SINGLE PROTEIN	CHEMBL1275368	1	Scientific Literature	Bioorg. Med. Chem.	2010
CHEMBL3810109		0	504.8	2	5.34	3b	O=C(O)c1cccc(N2N=C(C(F)(F)F)/C(=C/c3ccc(-c4cc(Cl)ccc4C(=O)O)o3)C2=O)c1	IC50	'>'	50000	nM				UO_0000065					FALSE	CHEMBL3811446	Inhibition of SARS coronavirus recombinant 3CL-PRO expressed in Escherichia coli JM109 cells using Dabcyl-KTSAVLQSGFRKME-Edans as fluorogenic substrate by fluorometric assay	B	BAO_0000219	cell-based format	SARS coronavirus					CHEMBL5118	Replicase polyprotein 1ab	SARS coronavirus	SINGLE PROTEIN	CHEMBL3808339	1	Scientific Literature	Bioorg. Med. Chem.	2016
CHEMBL3810328		0	468.9	1	6.13	3f	O=C(O)c1ccc(Cl)cc1-c1ccc(/C=C2\C(=O)N(c3ccccc3)N=C2c2ccccc2)o1	IC50	'='	16400	nM	4.79			UO_0000065	10.21	0.19	-1.34	5.76	FALSE	CHEMBL3811446	Inhibition of SARS coronavirus recombinant 3CL-PRO expressed in Escherichia coli JM109 cells using Dabcyl-KTSAVLQSGFRKME-Edans as fluorogenic substrate by fluorometric assay	B	BAO_0000219	cell-based format	SARS coronavirus					CHEMBL5118	Replicase polyprotein 1ab	SARS coronavirus	SINGLE PROTEIN	CHEMBL3808339	1	Scientific Literature	Bioorg. Med. Chem.	2016
CHEMBL3808658		0	486.89	1	6.27	3g	O=C(O)c1ccc(Cl)cc1-c1ccc(/C=C2\C(=O)N(c3ccc(F)cc3)N=C2c2ccccc2)o1	IC50	'='	20200	nM	4.7			UO_0000065	9.64	0.18	-1.58	5.65	FALSE	CHEMBL3811446	Inhibition of SARS coronavirus recombinant 3CL-PRO expressed in Escherichia coli JM109 cells using Dabcyl-KTSAVLQSGFRKME-Edans as fluorogenic substrate by fluorometric assay	B	BAO_0000219	cell-based format	SARS coronavirus					CHEMBL5118	Replicase polyprotein 1ab	SARS coronavirus	SINGLE PROTEIN	CHEMBL3808339	1	Scientific Literature	Bioorg. Med. Chem.	2016
CHEMBL3809059		0	464.48	1	5.49	3r	COc1ccc(N2N=C(c3ccccc3)/C(=C/c3ccc(-c4ccccc4C(=O)O)o3)C2=O)cc1	IC50	'='	30700	nM	4.51			UO_0000065	9.72	0.18	-0.98	4.89	FALSE	CHEMBL3811446	Inhibition of SARS coronavirus recombinant 3CL-PRO expressed in Escherichia coli JM109 cells using Dabcyl-KTSAVLQSGFRKME-Edans as fluorogenic substrate by fluorometric assay	B	BAO_0000219	cell-based format	SARS coronavirus					CHEMBL5118	Replicase polyprotein 1ab	SARS coronavirus	SINGLE PROTEIN	CHEMBL3808339	1	Scientific Literature	Bioorg. Med. Chem.	2016
CHEMBL3818000		0	577.55	3	-6.98	page 4129, R47C1,cpd2	CC(=O)N[C@@H](CC(N)=O)C(=O)N[C@@H](CO)C(=O)N[C@H](C(=O)N[C@@H](CO)C(=O)N[C@@H](CCC(N)=O)C(=O)O)[C@@H](C)O	IC50	'='	7500	nM	5.12			UO_0000065	8.87	0.17	12.1	1.55	FALSE	CHEMBL3819981	Inhibition of SARS coronavirus main proteinase 3C-like protease	B	BAO_0000019	assay format	SARS coronavirus					CHEMBL5118	Replicase polyprotein 1ab	SARS coronavirus	SINGLE PROTEIN	CHEMBL3817815	1	Scientific Literature	J. Med. Chem.	2016
CHEMBL492771		0	332.74	0	3.63	4	O=C(O)/C(O)=C/C(=O)c1cccc(OCc2ccc(Cl)cc2)c1	IC50	'='	24400	nM	4.61			UO_0000065	13.86	0.27	0.98	5.5	FALSE	CHEMBL964112	Inhibition of ATPase activity of SCV helicase assessed as phosphate release by colorimetric assay	B	BAO_0000357	single protein format	SARS coronavirus					CHEMBL5118	Replicase polyprotein 1ab	SARS coronavirus	SINGLE PROTEIN	CHEMBL1153308	1	Scientific Literature	Bioorg. Med. Chem. Lett.	2009
CHEMBL3105071		0	348.42	0	1.68	5, ZINC02865958	COc1ccccc1CNC(=O)[C@H](C)NS(=O)(=O)c1ccccc1	IC50	'>'	200000	nM		Outside typical range		UO_0000065					FALSE	CHEMBL3107396	Inhibition of SARS coronavirus 3C-like protease using 5-FAM-TSATLQSGFRK(QXL520)-NH2 as substrate preincubated for 5 mins followed by substrate addition measured after 6 mins by FRET assay in presence of GSH	B	BAO_0000019	assay format	SARS coronavirus					CHEMBL5118	Replicase polyprotein 1ab	SARS coronavirus	SINGLE PROTEIN	CHEMBL3102752	1	Scientific Literature	Bioorg. Med. Chem.	2014
CHEMBL3105076		0	203.13	0	0.95	14, F2124-0890	Nc1ncnc2[nH]c(C(F)(F)F)nc12	Ki	'='	11100	nM	4.96			UO_0000065	24.39	0.48	4	6.16	FALSE	CHEMBL3107387	Mixed-type inhibition of SARS coronavirus 3C-like protease using 5-FAM-TSATLQSGFRK(QXL520)-NH2 as substrate assessed as enzyme-substrate-inhibitor complex by Dixon plot analysis	B	BAO_0000019	assay format	SARS coronavirus					CHEMBL5118	Replicase polyprotein 1ab	SARS coronavirus	SINGLE PROTEIN	CHEMBL3102752	1	Scientific Literature	Bioorg. Med. Chem.	2014
CHEMBL1392147		0	349.41	0	2.6	6, ZINC04384885	CCOc1ccc(S(=O)(=O)NCc2ccc3c(c2)OCO3)cc1C	Inhibition						Not Active						FALSE	CHEMBL3107394	Inhibition of SARS coronavirus 3C-like protease using 5-FAM-TSATLQSGFRK(QXL520)-NH2 as substrate at 100 uM preincubated for 5 mins followed by substrate addition measured after 6 mins by FRET assay in presence of GSH relative to control	B	BAO_0000019	assay format	SARS coronavirus					CHEMBL5118	Replicase polyprotein 1ab	SARS coronavirus	SINGLE PROTEIN	CHEMBL3102752	1	Scientific Literature	Bioorg. Med. Chem.	2014
CHEMBL3105076		0	203.13	0	0.95	14, F2124-0890	Nc1ncnc2[nH]c(C(F)(F)F)nc12	Activity	'>'	50	%				UO_0000187					FALSE	CHEMBL3107390	Reversible inhibition of SARS coronavirus 3C-like protease using 5-FAM-TSATLQSGFRK(QXL520)-NH2 as substrate assessed as recovery rate at 20 x IC50 preincubated for 1 hr followed by compound washout by FRET assay in presence of GSH	B	BAO_0000019	assay format	SARS coronavirus					CHEMBL5118	Replicase polyprotein 1ab	SARS coronavirus	SINGLE PROTEIN	CHEMBL3102752	1	Scientific Literature	Bioorg. Med. Chem.	2014
CHEMBL558828		0	559.24	2	9.26	A11605	CCC(=C\c1sc2cc(C)c(C)cc2[n+]1CC)/C=C1/Sc2cc(/C=C/c3ccccc3)ccc2N1CC.[Cl-]	IC50	'='	6600	nM	5.18			UO_0000065	9.89	0.19	-4.08	72.76	FALSE	CHEMBL965235	Inhibition of SARS Coronavirus 3C-like protease expressed in Escherichia coli	B	BAO_0000019	assay format	SARS coronavirus					CHEMBL5118	Replicase polyprotein 1ab	SARS coronavirus	SINGLE PROTEIN	CHEMBL1137639	1	Scientific Literature	Antimicrob. Agents Chemother.	2007
CHEMBL376552		0	408.23	0	4.89	4g	Cc1cc(C(F)(F)F)nc(N2C(=O)CSC2c2c(Cl)cccc2Cl)n1	Inhibition	'<='	50	%				UO_0000187					FALSE	CHEMBL959057	Inhibition of SARS coronavirus nsp12 at 0.5 mM	B	BAO_0000357	single protein format	SARS coronavirus					CHEMBL5118	Replicase polyprotein 1ab	SARS coronavirus	SINGLE PROTEIN	CHEMBL1152146	1	Scientific Literature	Bioorg. Med. Chem. Lett.	2008
CHEMBL487062		0	339.46	0	3.15	7	O=C1CSC2(CCN(Cc3ccccc3)CC2)N1c1ccccn1	Inhibition	'<='	50	%				UO_0000187					FALSE	CHEMBL959057	Inhibition of SARS coronavirus nsp12 at 0.5 mM	B	BAO_0000357	single protein format	SARS coronavirus					CHEMBL5118	Replicase polyprotein 1ab	SARS coronavirus	SINGLE PROTEIN	CHEMBL1152146	1	Scientific Literature	Bioorg. Med. Chem. Lett.	2008
CHEMBL226272		0	416.33	1	5.54	4j	Cc1cc(-c2ccccc2)nc(N2C(=O)CSC2c2c(Cl)cccc2Cl)n1	Inhibition	'<='	50	%				UO_0000187					FALSE	CHEMBL959057	Inhibition of SARS coronavirus nsp12 at 0.5 mM	B	BAO_0000357	single protein format	SARS coronavirus					CHEMBL5118	Replicase polyprotein 1ab	SARS coronavirus	SINGLE PROTEIN	CHEMBL1152146	1	Scientific Literature	Bioorg. Med. Chem. Lett.	2008
CHEMBL549646		0	331.75	0	3.15	2a	O=c1cc(CNCc2ccc(Cl)cc2)oc2ccc(O)c(O)c12	IC50	'>'	50000	nM				UO_0000065					FALSE	CHEMBL1057306	Inhibition of SARS coronavirus helicase assessed as duplex-DNA unwinding by FRET based assay	B	BAO_0000357	single protein format	SARS coronavirus					CHEMBL5118	Replicase polyprotein 1ab	SARS coronavirus	SINGLE PROTEIN	CHEMBL1153502	1	Scientific Literature	Bioorg. Med. Chem. Lett.	2009
CHEMBL560136		0	331.75	0	3.15	2b	O=c1cc(CNCc2cccc(Cl)c2)oc2ccc(O)c(O)c12	IC50	'>'	50000	nM				UO_0000065					FALSE	CHEMBL1057306	Inhibition of SARS coronavirus helicase assessed as duplex-DNA unwinding by FRET based assay	B	BAO_0000357	single protein format	SARS coronavirus					CHEMBL5118	Replicase polyprotein 1ab	SARS coronavirus	SINGLE PROTEIN	CHEMBL1153502	1	Scientific Literature	Bioorg. Med. Chem. Lett.	2009
CHEMBL1906723		0	325.37	0	2.33	1, ZINC01808425	COc1ccc(C(=O)Cn2c(NCCO)nc3ccccc32)cc1	IC50	'='	28800	nM	4.54			UO_0000065	13.96	0.26	2.21	5.94	FALSE	CHEMBL3107397	Inhibition of SARS coronavirus 3C-like protease using 5-FAM-TSATLQSGFRK(QXL520)-NH2 as substrate preincubated for 5 mins followed by substrate addition measured after 6 mins by FRET assay	B	BAO_0000019	assay format	SARS coronavirus					CHEMBL5118	Replicase polyprotein 1ab	SARS coronavirus	SINGLE PROTEIN	CHEMBL3102752	1	Scientific Literature	Bioorg. Med. Chem.	2014
CHEMBL3105075		0	485.7	1	7.34	13, F9995-0306	C(=C/c1ccccc1)\C[N+]1(C/C=C/c2ccccc2)CCN(C(c2ccccc2)c2ccccc2)CC1	IC50	'='	28300	nM	4.55			UO_0000065	9.36	0.17	-2.79	140.38	FALSE	CHEMBL3107396	Inhibition of SARS coronavirus 3C-like protease using 5-FAM-TSATLQSGFRK(QXL520)-NH2 as substrate preincubated for 5 mins followed by substrate addition measured after 6 mins by FRET assay in presence of GSH	B	BAO_0000019	assay format	SARS coronavirus					CHEMBL5118	Replicase polyprotein 1ab	SARS coronavirus	SINGLE PROTEIN	CHEMBL3102752	1	Scientific Literature	Bioorg. Med. Chem.	2014
CHEMBL550256		0	426.81	0	4.51	4a	O=c1c(O)c(-c2ccc(O)c(O)c2)oc2cc(OCc3ccc(Cl)cc3)cc(O)c12	IC50	'='	4100	nM	5.39			UO_0000065	12.62	0.25	0.88	4.48	FALSE	CHEMBL1057306	Inhibition of SARS coronavirus helicase assessed as duplex-DNA unwinding by FRET based assay	B	BAO_0000357	single protein format	SARS coronavirus					CHEMBL5118	Replicase polyprotein 1ab	SARS coronavirus	SINGLE PROTEIN	CHEMBL1153502	1	Scientific Literature	Bioorg. Med. Chem. Lett.	2009
CHEMBL551130		0	426.81	0	4.51	4b	O=c1c(O)c(-c2ccc(O)c(O)c2)oc2cc(OCc3cccc(Cl)c3)cc(O)c12	IC50	'='	5200	nM	5.28			UO_0000065	12.38	0.24	0.77	4.39	FALSE	CHEMBL1057306	Inhibition of SARS coronavirus helicase assessed as duplex-DNA unwinding by FRET based assay	B	BAO_0000357	single protein format	SARS coronavirus					CHEMBL5118	Replicase polyprotein 1ab	SARS coronavirus	SINGLE PROTEIN	CHEMBL1153502	1	Scientific Literature	Bioorg. Med. Chem. Lett.	2009
CHEMBL1488602		0	278.35	0	1.62	4, ZINC02842242	COCCOCCn1c(CCCO)nc2ccccc21	IC50	'='	25600	nM	4.59			UO_0000065	16.5	0.31	2.97	8.13	FALSE	CHEMBL3107397	Inhibition of SARS coronavirus 3C-like protease using 5-FAM-TSATLQSGFRK(QXL520)-NH2 as substrate preincubated for 5 mins followed by substrate addition measured after 6 mins by FRET assay	B	BAO_0000019	assay format	SARS coronavirus					CHEMBL5118	Replicase polyprotein 1ab	SARS coronavirus	SINGLE PROTEIN	CHEMBL3102752	1	Scientific Literature	Bioorg. Med. Chem.	2014
CHEMBL1906723		0	325.37	0	2.33	1, ZINC01808425	COc1ccc(C(=O)Cn2c(NCCO)nc3ccccc32)cc1	Activity	'='	14.3	%				UO_0000187					FALSE	CHEMBL3107390	Reversible inhibition of SARS coronavirus 3C-like protease using 5-FAM-TSATLQSGFRK(QXL520)-NH2 as substrate assessed as recovery rate at 20 x IC50 preincubated for 1 hr followed by compound washout by FRET assay in presence of GSH	B	BAO_0000019	assay format	SARS coronavirus					CHEMBL5118	Replicase polyprotein 1ab	SARS coronavirus	SINGLE PROTEIN	CHEMBL3102752	1	Scientific Literature	Bioorg. Med. Chem.	2014
CHEMBL551334		0	438.82	0	4.83	4d	O=c1c(O)c(-c2ccc3c(c2)OCO3)oc2cc(OCc3ccc(Cl)cc3)cc(O)c12	IC50	'='	9300	nM	5.03			UO_0000065	11.47	0.22	0.2	5.12	FALSE	CHEMBL1057306	Inhibition of SARS coronavirus helicase assessed as duplex-DNA unwinding by FRET based assay	B	BAO_0000357	single protein format	SARS coronavirus					CHEMBL5118	Replicase polyprotein 1ab	SARS coronavirus	SINGLE PROTEIN	CHEMBL1153502	1	Scientific Literature	Bioorg. Med. Chem. Lett.	2009
CHEMBL551529		0	429.38	0	4.05	4f	N#Cc1cccc(COc2cc(O)c3c(=O)c(O)c(-c4ccc5c(c4)OCO5)oc3c2)c1	IC50	'='	8100	nM	5.09			UO_0000065	11.86	0.22	1.04	4.17	FALSE	CHEMBL1057306	Inhibition of SARS coronavirus helicase assessed as duplex-DNA unwinding by FRET based assay	B	BAO_0000357	single protein format	SARS coronavirus					CHEMBL5118	Replicase polyprotein 1ab	SARS coronavirus	SINGLE PROTEIN	CHEMBL1153502	1	Scientific Literature	Bioorg. Med. Chem. Lett.	2009
CHEMBL551529		0	429.38	0	4.05	4f	N#Cc1cccc(COc2cc(O)c3c(=O)c(O)c(-c4ccc5c(c4)OCO5)oc3c2)c1	IC50	'='	42900	nM	4.37			UO_0000065	10.17	0.19	0.32	3.58	FALSE	CHEMBL1055727	Inhibition of ATPase activity of SARS coronavirus helicase assessed as phosphate release by malachite green assay	B	BAO_0000357	single protein format	SARS coronavirus					CHEMBL5118	Replicase polyprotein 1ab	SARS coronavirus	SINGLE PROTEIN	CHEMBL1153502	1	Scientific Literature	Bioorg. Med. Chem. Lett.	2009
CHEMBL556501		0	314.25	0	2.31	3b	O=c1c(O)c(-c2ccc3c(c2)OCO3)oc2cc(O)cc(O)c12	IC50	'>'	50000	nM				UO_0000065					FALSE	CHEMBL1055727	Inhibition of ATPase activity of SARS coronavirus helicase assessed as phosphate release by malachite green assay	B	BAO_0000357	single protein format	SARS coronavirus					CHEMBL5118	Replicase polyprotein 1ab	SARS coronavirus	SINGLE PROTEIN	CHEMBL1153502	1	Scientific Literature	Bioorg. Med. Chem. Lett.	2009
CHEMBL50	QUERCETIN	3	302.24	0	1.99	3a	O=c1c(O)c(-c2ccc(O)c(O)c2)oc2cc(O)cc(O)c12	IC50	'='	8100	nM	5.09			UO_0000065	16.85	0.32	3.1	3.88	FALSE	CHEMBL1057306	Inhibition of SARS coronavirus helicase assessed as duplex-DNA unwinding by FRET based assay	B	BAO_0000357	single protein format	SARS coronavirus					CHEMBL5118	Replicase polyprotein 1ab	SARS coronavirus	SINGLE PROTEIN	CHEMBL1153502	1	Scientific Literature	Bioorg. Med. Chem. Lett.	2009
CHEMBL557699		0	552.7	1	4.56	14f	CCN(CC)C(=O)CC[C@H](NC(=O)[C@@H](NC(=O)OCc1ccccc1)C(C)C)C(=O)c1nc2ccccc2s1	Ki	'='	159000	nM		Outside typical range		UO_0000065					FALSE	CHEMBL1027049	Inhibition of SARS coronavirus 3CL protease pretreated for 10 mins before substrate addition	B	BAO_0000019	assay format	SARS coronavirus					CHEMBL5118	Replicase polyprotein 1ab	SARS coronavirus	SINGLE PROTEIN	CHEMBL1151865	1	Scientific Literature	Bioorg. Med. Chem. Lett.	2009
CHEMBL492768		0	298.29	0	2.97	1	O=C(O)/C(O)=C/C(=O)c1ccc(OCc2ccccc2)cc1	IC50	'='	39900	nM	4.4			UO_0000065	14.75	0.27	1.43	5.25	FALSE	CHEMBL964113	Inhibition of SCV helicase assessed as duplex-DNA unwinding by FRET based assay	B	BAO_0000357	single protein format	SARS coronavirus					CHEMBL5118	Replicase polyprotein 1ab	SARS coronavirus	SINGLE PROTEIN	CHEMBL1153308	1	Scientific Literature	Bioorg. Med. Chem. Lett.	2009
CHEMBL1448	NICLOSAMIDE	4	327.12	0	3.86	3	O=C(Nc1ccc([N+](=O)[O-])cc1Cl)c1cc(Cl)ccc1O	IC50	'='	40000	nM	4.4			UO_0000065	13.44	0.29	0.54	4.76	FALSE	CHEMBL1049454	Inhibition of SARS Co-V 3CL protease	B	BAO_0000019	assay format	SARS coronavirus					CHEMBL5118	Replicase polyprotein 1ab	SARS coronavirus	SINGLE PROTEIN	CHEMBL1152503	1	Scientific Literature	Bioorg. Med. Chem.	2009
CHEMBL238217		0	636.79	1	2.07	3, GRL-0155S	CCOC(=O)/C=C/[C@H](C[C@@H]1CCNC1=O)NC(=O)[C@H](CC=C(C)C)CC(=O)[C@@H](NC(=O)[C@H](CO)NC(=O)OC(C)(C)C)C(C)C	IC50	'='	80000	nM	4.1			UO_0000065	6.43	0.12	2.03	2.17	FALSE	CHEMBL898907	Inhibition of SARS-CoV 3C-like protease by FRET based microplate assay	B	BAO_0000019	assay format	SARS coronavirus					CHEMBL5118	Replicase polyprotein 1ab	SARS coronavirus	SINGLE PROTEIN	CHEMBL1137503	1	Scientific Literature	Bioorg. Med. Chem. Lett.	2007
CHEMBL12798	METHYL DEHYDROABIETATE	0	314.47	0	4.99	6	COC(=O)[C@]1(C)CCC[C@]2(C)c3ccc(C(C)C)cc3CC[C@H]21	Inhibition	'='	46.7	%				UO_0000187					FALSE	CHEMBL1286521	Inhibition of SARS coronavirus 3C-like protease at 200 uM after 60 mins by FRET assay	B	BAO_0000019	assay format	SARS coronavirus					CHEMBL5118	Replicase polyprotein 1ab	SARS coronavirus	SINGLE PROTEIN	CHEMBL1275337	1	Scientific Literature	Bioorg. Med. Chem.	2010
CHEMBL1277754		0	344.5	0	4.74	5	CC(=O)Oc1cc2c(cc1C(C)C)CC[C@@H]1[C@]2(C)CCC[C@@]1(C)CO	IC50	'='	128900	nM		Outside typical range		UO_0000065					FALSE	CHEMBL1286522	Inhibition of SARS coronavirus 3C-like protease after 60 mins by FRET assay	B	BAO_0000019	assay format	SARS coronavirus					CHEMBL5118	Replicase polyprotein 1ab	SARS coronavirus	SINGLE PROTEIN	CHEMBL1275337	1	Scientific Literature	Bioorg. Med. Chem.	2010
CHEMBL3105076		0	203.13	0	0.95	14, F2124-0890	Nc1ncnc2[nH]c(C(F)(F)F)nc12	IC50	'='	2200	nM	5.66			UO_0000065	27.85	0.55	4.71	7.03	FALSE	CHEMBL3107397	Inhibition of SARS coronavirus 3C-like protease using 5-FAM-TSATLQSGFRK(QXL520)-NH2 as substrate preincubated for 5 mins followed by substrate addition measured after 6 mins by FRET assay	B	BAO_0000019	assay format	SARS coronavirus					CHEMBL5118	Replicase polyprotein 1ab	SARS coronavirus	SINGLE PROTEIN	CHEMBL3102752	1	Scientific Literature	Bioorg. Med. Chem.	2014
CHEMBL3105073		0	349.33	0	4.76	11, CD11546	S=C(NCc1cccnc1)SCc1cc(Cl)sc1Cl	IC50	'='	160	nM	6.8			UO_0000065	19.45	0.49	2.04	27.27	FALSE	CHEMBL3107397	Inhibition of SARS coronavirus 3C-like protease using 5-FAM-TSATLQSGFRK(QXL520)-NH2 as substrate preincubated for 5 mins followed by substrate addition measured after 6 mins by FRET assay	B	BAO_0000019	assay format	SARS coronavirus					CHEMBL5118	Replicase polyprotein 1ab	SARS coronavirus	SINGLE PROTEIN	CHEMBL3102752	1	Scientific Literature	Bioorg. Med. Chem.	2014
CHEMBL492769		0	332.74	0	3.63	2	O=C(O)/C(O)=C/C(=O)c1ccc(OCc2ccc(Cl)cc2)cc1	IC50	'>'	50000	nM				UO_0000065					FALSE	CHEMBL964112	Inhibition of ATPase activity of SCV helicase assessed as phosphate release by colorimetric assay	B	BAO_0000357	single protein format	SARS coronavirus					CHEMBL5118	Replicase polyprotein 1ab	SARS coronavirus	SINGLE PROTEIN	CHEMBL1153308	1	Scientific Literature	Bioorg. Med. Chem. Lett.	2009
CHEMBL3809159		0	372.38	0	4.45	3l	CC1=NN(c2cccc(C(=O)O)c2)C(=O)/C1=C\c1ccc(-c2ccccc2)o1	IC50	'>'	50000	nM				UO_0000065					FALSE	CHEMBL3811446	Inhibition of SARS coronavirus recombinant 3CL-PRO expressed in Escherichia coli JM109 cells using Dabcyl-KTSAVLQSGFRKME-Edans as fluorogenic substrate by fluorometric assay	B	BAO_0000219	cell-based format	SARS coronavirus					CHEMBL5118	Replicase polyprotein 1ab	SARS coronavirus	SINGLE PROTEIN	CHEMBL3808339	1	Scientific Literature	Bioorg. Med. Chem.	2016
CHEMBL3809053		0	444.49	1	5.89	3t	O=C(O)c1cccc(N2N=C(c3ccccc3)/C(=C/c3ccc(-c4ccccc4)cc3)C2=O)c1	IC50	'='	6700	nM	5.17			UO_0000065	11.64	0.21	-0.72	7.39	FALSE	CHEMBL3811446	Inhibition of SARS coronavirus recombinant 3CL-PRO expressed in Escherichia coli JM109 cells using Dabcyl-KTSAVLQSGFRKME-Edans as fluorogenic substrate by fluorometric assay	B	BAO_0000219	cell-based format	SARS coronavirus					CHEMBL5118	Replicase polyprotein 1ab	SARS coronavirus	SINGLE PROTEIN	CHEMBL3808339	1	Scientific Literature	Bioorg. Med. Chem.	2016
CHEMBL499444		0	298.29	0	2.97	5	O=C(O)/C(O)=C/C(=O)c1ccccc1OCc1ccccc1	IC50	'>'	50000	nM				UO_0000065					FALSE	CHEMBL964112	Inhibition of ATPase activity of SCV helicase assessed as phosphate release by colorimetric assay	B	BAO_0000357	single protein format	SARS coronavirus					CHEMBL5118	Replicase polyprotein 1ab	SARS coronavirus	SINGLE PROTEIN	CHEMBL1153308	1	Scientific Literature	Bioorg. Med. Chem. Lett.	2009
CHEMBL1350514		0	476.53	0	4	6	Cc1ccc(C(=O)N/C(=C\c2ccc(-c3cccc([N+](=O)[O-])c3)o2)C(=O)NCCCN(C)C)cc1	Inhibition	'='	82.59	%				UO_0000187					FALSE	CHEMBL1777451	Inhibition of SARS coronavirus recombinant 3C-like protease expressed in Escherichia coli BL21(DE3) at 100 uM after 18 mins by FRET based assay	B	BAO_0000019	assay format	SARS coronavirus					CHEMBL5118	Replicase polyprotein 1ab	SARS coronavirus	SINGLE PROTEIN	CHEMBL1773021	1	Scientific Literature	Bioorg. Med. Chem. Lett.	2011
CHEMBL1774326		0	495.63	0	3.96	5	O=C(CSc1ncnc2c1sc1nc(N3CCOCC3)c3c(c12)CCCC3)NCc1ccco1	IC50	'='	90720	nM	4.04			UO_0000065	8.16	0.16	0.08	4.33	FALSE	CHEMBL1777452	Inhibition of SARS coronavirus recombinant 3C-like protease expressed in Escherichia coli BL21(DE3) after 30 mins by FRET based assay	B	BAO_0000019	assay format	SARS coronavirus					CHEMBL5118	Replicase polyprotein 1ab	SARS coronavirus	SINGLE PROTEIN	CHEMBL1773021	1	Scientific Literature	Bioorg. Med. Chem. Lett.	2011
CHEMBL1315054		0	476.53	0	4	7	Cc1ccc(C(=O)N/C(=C\c2ccc(-c3ccccc3[N+](=O)[O-])o2)C(=O)NCCCN(C)C)cc1	Inhibition						Active						FALSE	CHEMBL1777453	Competitive inhibition of SARS coronavirus recombinant 3C-like protease expressed in Escherichia coli BL21(DE3) by Dixon plot analysis	B	BAO_0000019	assay format	SARS coronavirus					CHEMBL5118	Replicase polyprotein 1ab	SARS coronavirus	SINGLE PROTEIN	CHEMBL1773021	1	Scientific Literature	Bioorg. Med. Chem. Lett.	2011
CHEMBL518906		0	342.25	0	4.75	5c	CC1SC(c2c(Cl)cccc2Cl)N(Cc2ccco2)C1=O	Inhibition	'<='	50	%				UO_0000187					FALSE	CHEMBL959057	Inhibition of SARS coronavirus nsp12 at 0.5 mM	B	BAO_0000357	single protein format	SARS coronavirus					CHEMBL5118	Replicase polyprotein 1ab	SARS coronavirus	SINGLE PROTEIN	CHEMBL1152146	1	Scientific Literature	Bioorg. Med. Chem. Lett.	2008
CHEMBL488444		0	313.43	0	3.23	4e	Cc1cccc(N2C(=O)CSC2c2ccc(N(C)C)cc2)n1	Inhibition	'<='	50	%				UO_0000187					FALSE	CHEMBL959057	Inhibition of SARS coronavirus nsp12 at 0.5 mM	B	BAO_0000357	single protein format	SARS coronavirus					CHEMBL5118	Replicase polyprotein 1ab	SARS coronavirus	SINGLE PROTEIN	CHEMBL1152146	1	Scientific Literature	Bioorg. Med. Chem. Lett.	2008
CHEMBL499444		0	298.29	0	2.97	5	O=C(O)/C(O)=C/C(=O)c1ccccc1OCc1ccccc1	IC50	'>'	50000	nM				UO_0000065					FALSE	CHEMBL964113	Inhibition of SCV helicase assessed as duplex-DNA unwinding by FRET based assay	B	BAO_0000357	single protein format	SARS coronavirus					CHEMBL5118	Replicase polyprotein 1ab	SARS coronavirus	SINGLE PROTEIN	CHEMBL1153308	1	Scientific Literature	Bioorg. Med. Chem. Lett.	2009
CHEMBL492768		0	298.29	0	2.97	1	O=C(O)/C(O)=C/C(=O)c1ccc(OCc2ccccc2)cc1	IC50	'='	41300	nM	4.38			UO_0000065	14.7	0.27	1.41	5.23	FALSE	CHEMBL964112	Inhibition of ATPase activity of SCV helicase assessed as phosphate release by colorimetric assay	B	BAO_0000357	single protein format	SARS coronavirus					CHEMBL5118	Replicase polyprotein 1ab	SARS coronavirus	SINGLE PROTEIN	CHEMBL1153308	1	Scientific Literature	Bioorg. Med. Chem. Lett.	2009
CHEMBL1315054		0	476.53	0	4	7	Cc1ccc(C(=O)N/C(=C\c2ccc(-c3ccccc3[N+](=O)[O-])o2)C(=O)NCCCN(C)C)cc1	Inhibition	'='	81.43	%				UO_0000187					FALSE	CHEMBL1777451	Inhibition of SARS coronavirus recombinant 3C-like protease expressed in Escherichia coli BL21(DE3) at 100 uM after 18 mins by FRET based assay	B	BAO_0000019	assay format	SARS coronavirus					CHEMBL5118	Replicase polyprotein 1ab	SARS coronavirus	SINGLE PROTEIN	CHEMBL1773021	1	Scientific Literature	Bioorg. Med. Chem. Lett.	2011
CHEMBL1092797	DIHYDROCELASTROL	0	452.64	1	6.64	5	Cc1c(O)c(O)cc2c1CC=C1[C@@]3(C)CC[C@@]4(C)CC[C@@](C)(C(=O)O)C[C@H]4[C@]3(C)CC[C@]12C	Ki						Not Determined						FALSE	CHEMBL1113304	Inhibition of 3C-like protease of SARS coronavirus assessed as concentration of FRET peptide for 60 mins by dixon plot	B	BAO_0000019	assay format	SARS coronavirus					CHEMBL5118	Replicase polyprotein 1ab	SARS coronavirus	SINGLE PROTEIN	CHEMBL1155394	1	Scientific Literature	Bioorg. Med. Chem. Lett.	2010
CHEMBL432519	TINGENONE	0	420.59	1	6.42	3	CC1=C(O)C(=O)C=C2C1=CC=C1[C@@]3(C)CC[C@@]4(C)CC(=O)[C@H](C)C[C@H]4[C@]3(C)CC[C@@]21C	IC50	'='	9900	nM	5			UO_0000065	11.9	0.22	-1.42	9.2	FALSE	CHEMBL1113303	Inhibition of 3C-like protease of SARS coronavirus assessed as concentration of FRET peptide for 60 mins	B	BAO_0000019	assay format	SARS coronavirus					CHEMBL5118	Replicase polyprotein 1ab	SARS coronavirus	SINGLE PROTEIN	CHEMBL1155394	1	Scientific Literature	Bioorg. Med. Chem. Lett.	2010
CHEMBL1774325		0	445.48	0	3.33	4	COc1cc(/C=N/NC(=O)/C(=C\c2ccccc2)NC(=O)c2ccccc2)cc(OC)c1O	IC50	'='	77090	nM	4.11			UO_0000065	9.23	0.17	0.78	3.76	FALSE	CHEMBL1777452	Inhibition of SARS coronavirus recombinant 3C-like protease expressed in Escherichia coli BL21(DE3) after 30 mins by FRET based assay	B	BAO_0000019	assay format	SARS coronavirus					CHEMBL5118	Replicase polyprotein 1ab	SARS coronavirus	SINGLE PROTEIN	CHEMBL1773021	1	Scientific Literature	Bioorg. Med. Chem. Lett.	2011
CHEMBL1774323		0	482.58	0	3.88	2	COc1cc(C2C(C(=O)c3ccc(OCC(C)C)cc3C)=C(O)C(=O)N2CCN(C)C)ccc1O	IC50	'='	62790	nM	4.2			UO_0000065	8.71	0.16	0.32	4.22	FALSE	CHEMBL1777452	Inhibition of SARS coronavirus recombinant 3C-like protease expressed in Escherichia coli BL21(DE3) after 30 mins by FRET based assay	B	BAO_0000019	assay format	SARS coronavirus					CHEMBL5118	Replicase polyprotein 1ab	SARS coronavirus	SINGLE PROTEIN	CHEMBL1773021	1	Scientific Literature	Bioorg. Med. Chem. Lett.	2011
CHEMBL116438	CURCUMIN	3	368.39	0	3.85	Curcumin	COc1cc(/C=C/C(=O)/C=C(O)/C=C/c2ccc(O)c(OC)c2)ccc1O	IC50	'='	23500	nM	4.63			UO_0000065	12.57	0.23	0.78	4.81	FALSE	CHEMBL1113303	Inhibition of 3C-like protease of SARS coronavirus assessed as concentration of FRET peptide for 60 mins	B	BAO_0000019	assay format	SARS coronavirus					CHEMBL5118	Replicase polyprotein 1ab	SARS coronavirus	SINGLE PROTEIN	CHEMBL1155394	1	Scientific Literature	Bioorg. Med. Chem. Lett.	2010
CHEMBL301982	CELASTROL	0	450.62	1	6.7	1	CC1=C(O)C(=O)C=C2C1=CC=C1[C@@]3(C)CC[C@@]4(C)CC[C@@](C)(C(=O)O)C[C@H]4[C@]3(C)CC[C@@]21C	IC50	'='	10300	nM	4.99			UO_0000065	11.07	0.21	-1.71	6.69	FALSE	CHEMBL1113303	Inhibition of 3C-like protease of SARS coronavirus assessed as concentration of FRET peptide for 60 mins	B	BAO_0000019	assay format	SARS coronavirus					CHEMBL5118	Replicase polyprotein 1ab	SARS coronavirus	SINGLE PROTEIN	CHEMBL1155394	1	Scientific Literature	Bioorg. Med. Chem. Lett.	2010
CHEMBL301982	CELASTROL	0	450.62	1	6.7	1	CC1=C(O)C(=O)C=C2C1=CC=C1[C@@]3(C)CC[C@@]4(C)CC[C@@](C)(C(=O)O)C[C@H]4[C@]3(C)CC[C@@]21C	Ki	'='	4200	nM	5.38			UO_0000065	11.93	0.22	-1.32	7.21	FALSE	CHEMBL1113304	Inhibition of 3C-like protease of SARS coronavirus assessed as concentration of FRET peptide for 60 mins by dixon plot	B	BAO_0000019	assay format	SARS coronavirus					CHEMBL5118	Replicase polyprotein 1ab	SARS coronavirus	SINGLE PROTEIN	CHEMBL1155394	1	Scientific Literature	Bioorg. Med. Chem. Lett.	2010
CHEMBL393608		0	547.65	1	1.4	7	CCOC(=O)/C=C/[C@H](C[C@@H]1CCNC1=O)NC(=O)[C@H](CC(C)C)NC(=O)[C@@H](NC(=O)c1cc(C)on1)C(C)C	IC50	'='	200000	nM		Outside typical range		UO_0000065					FALSE	CHEMBL898907	Inhibition of SARS-CoV 3C-like protease by FRET based microplate assay	B	BAO_0000019	assay format	SARS coronavirus					CHEMBL5118	Replicase polyprotein 1ab	SARS coronavirus	SINGLE PROTEIN	CHEMBL1137503	1	Scientific Literature	Bioorg. Med. Chem. Lett.	2007
CHEMBL238216		0	581.67	1	1.6	6	CCOC(=O)/C=C/[C@H](C[C@@H]1CCNC1=O)NC(=O)[C@H](Cc1ccccc1)NC(=O)[C@@H](NC(=O)c1cc(C)on1)C(C)C	IC50	'='	300000	nM		Outside typical range		UO_0000065					FALSE	CHEMBL898907	Inhibition of SARS-CoV 3C-like protease by FRET based microplate assay	B	BAO_0000019	assay format	SARS coronavirus					CHEMBL5118	Replicase polyprotein 1ab	SARS coronavirus	SINGLE PROTEIN	CHEMBL1137503	1	Scientific Literature	Bioorg. Med. Chem. Lett.	2007
CHEMBL522710		0	331.75	0	3.66	8	O=C(O)/C(O)=C/C(=O)c1cccc(NCc2ccc(Cl)cc2)c1	IC50	'='	11000	nM	4.96			UO_0000065	14.95	0.29	1.3	5.72	FALSE	CHEMBL964113	Inhibition of SCV helicase assessed as duplex-DNA unwinding by FRET based assay	B	BAO_0000357	single protein format	SARS coronavirus					CHEMBL5118	Replicase polyprotein 1ab	SARS coronavirus	SINGLE PROTEIN	CHEMBL1153308	1	Scientific Literature	Bioorg. Med. Chem. Lett.	2009
CHEMBL492770		0	298.29	0	2.97	3	O=C(O)/C(O)=C/C(=O)c1cccc(OCc2ccccc2)c1	IC50	'>'	50000	nM				UO_0000065					FALSE	CHEMBL964113	Inhibition of SCV helicase assessed as duplex-DNA unwinding by FRET based assay	B	BAO_0000357	single protein format	SARS coronavirus					CHEMBL5118	Replicase polyprotein 1ab	SARS coronavirus	SINGLE PROTEIN	CHEMBL1153308	1	Scientific Literature	Bioorg. Med. Chem. Lett.	2009
CHEMBL550256		0	426.81	0	4.51	4a	O=c1c(O)c(-c2ccc(O)c(O)c2)oc2cc(OCc3ccc(Cl)cc3)cc(O)c12	IC50	'='	20900	nM	4.68			UO_0000065	10.96	0.21	0.17	3.89	FALSE	CHEMBL1055727	Inhibition of ATPase activity of SARS coronavirus helicase assessed as phosphate release by malachite green assay	B	BAO_0000357	single protein format	SARS coronavirus					CHEMBL5118	Replicase polyprotein 1ab	SARS coronavirus	SINGLE PROTEIN	CHEMBL1153502	1	Scientific Literature	Bioorg. Med. Chem. Lett.	2009
CHEMBL1774323		0	482.58	0	3.88	2	COc1cc(C2C(C(=O)c3ccc(OCC(C)C)cc3C)=C(O)C(=O)N2CCN(C)C)ccc1O	Inhibition	'='	61.36	%				UO_0000187					FALSE	CHEMBL1777451	Inhibition of SARS coronavirus recombinant 3C-like protease expressed in Escherichia coli BL21(DE3) at 100 uM after 18 mins by FRET based assay	B	BAO_0000019	assay format	SARS coronavirus					CHEMBL5118	Replicase polyprotein 1ab	SARS coronavirus	SINGLE PROTEIN	CHEMBL1773021	1	Scientific Literature	Bioorg. Med. Chem. Lett.	2011
CHEMBL1350514		0	476.53	0	4	6	Cc1ccc(C(=O)N/C(=C\c2ccc(-c3cccc([N+](=O)[O-])c3)o2)C(=O)NCCCN(C)C)cc1	Inhibition						Active						FALSE	CHEMBL1777453	Competitive inhibition of SARS coronavirus recombinant 3C-like protease expressed in Escherichia coli BL21(DE3) by Dixon plot analysis	B	BAO_0000019	assay format	SARS coronavirus					CHEMBL5118	Replicase polyprotein 1ab	SARS coronavirus	SINGLE PROTEIN	CHEMBL1773021	1	Scientific Literature	Bioorg. Med. Chem. Lett.	2011
CHEMBL226658		0	226.03	0	1.58	3j	O=C1Nc2cccc(Br)c2C1=O	Inhibition	'='	68.44	%				UO_0000187					FALSE	CHEMBL3102682	Inhibition of GST-tagged SARS coronavirus 3C-like protease at 1 mM by FRET assay	B	BAO_0000019	assay format	SARS coronavirus					CHEMBL5118	Replicase polyprotein 1ab	SARS coronavirus	SINGLE PROTEIN	CHEMBL3098093	1	Scientific Literature	Bioorg. Med. Chem.	2014
CHEMBL222660	5-METHOXYISATIN	0	177.16	0	0.83	3f	COc1ccc2c(c1)C(=O)C(=O)N2	Inhibition	'='	95.32	%				UO_0000187					FALSE	CHEMBL3102682	Inhibition of GST-tagged SARS coronavirus 3C-like protease at 1 mM by FRET assay	B	BAO_0000019	assay format	SARS coronavirus					CHEMBL5118	Replicase polyprotein 1ab	SARS coronavirus	SINGLE PROTEIN	CHEMBL3098093	1	Scientific Literature	Bioorg. Med. Chem.	2014
CHEMBL327012		0	181.58	0	1.47	3c	O=C1Nc2ccc(Cl)cc2C1=O	Inhibition	'='	84.17	%				UO_0000187					FALSE	CHEMBL3102682	Inhibition of GST-tagged SARS coronavirus 3C-like protease at 1 mM by FRET assay	B	BAO_0000019	assay format	SARS coronavirus					CHEMBL5118	Replicase polyprotein 1ab	SARS coronavirus	SINGLE PROTEIN	CHEMBL3098093	1	Scientific Literature	Bioorg. Med. Chem.	2014
CHEMBL325480	5-IODOISATIN	0	273.03	0	1.43	3b	O=C1Nc2ccc(I)cc2C1=O	Inhibition	'='	86.73	%				UO_0000187					FALSE	CHEMBL3102682	Inhibition of GST-tagged SARS coronavirus 3C-like protease at 1 mM by FRET assay	B	BAO_0000019	assay format	SARS coronavirus					CHEMBL5118	Replicase polyprotein 1ab	SARS coronavirus	SINGLE PROTEIN	CHEMBL3098093	1	Scientific Literature	Bioorg. Med. Chem.	2014
CHEMBL3099529		0	336.41	0	1.51	8m1	CC1CC(C)CN(S(=O)(=O)c2ccc3c(c2)C(=O)C(=O)N3C)C1	IC50	'='	2820	nM	5.55			UO_0000065	16.5	0.33	4.04	7.42	FALSE	CHEMBL3102681	Inhibition of GST-tagged SARS coronavirus 3C-like protease by FRET assay	B	BAO_0000019	assay format	SARS coronavirus					CHEMBL5118	Replicase polyprotein 1ab	SARS coronavirus	SINGLE PROTEIN	CHEMBL3098093	1	Scientific Literature	Bioorg. Med. Chem.	2014
CHEMBL560136		0	331.75	0	3.15	2b	O=c1cc(CNCc2cccc(Cl)c2)oc2ccc(O)c(O)c12	IC50	'>'	50000	nM				UO_0000065					FALSE	CHEMBL1055727	Inhibition of ATPase activity of SARS coronavirus helicase assessed as phosphate release by malachite green assay	B	BAO_0000357	single protein format	SARS coronavirus					CHEMBL5118	Replicase polyprotein 1ab	SARS coronavirus	SINGLE PROTEIN	CHEMBL1153502	1	Scientific Literature	Bioorg. Med. Chem. Lett.	2009
CHEMBL560392		0	322.32	0	2.37	2c	N#Cc1cccc(CNCc2cc(=O)c3c(O)c(O)ccc3o2)c1	IC50	'>'	50000	nM				UO_0000065					FALSE	CHEMBL1057306	Inhibition of SARS coronavirus helicase assessed as duplex-DNA unwinding by FRET based assay	B	BAO_0000357	single protein format	SARS coronavirus					CHEMBL5118	Replicase polyprotein 1ab	SARS coronavirus	SINGLE PROTEIN	CHEMBL1153502	1	Scientific Literature	Bioorg. Med. Chem. Lett.	2009
CHEMBL397154		0	625.76	2	0.67	4	CCOC(=O)/C=C/[C@H](C[C@@H]1CCNC1=O)NC(=O)[C@H](CC(C)C)NC(=O)[C@@H](NC(=O)[C@H](CO)NC(=O)OC(C)(C)C)C(C)C	IC50	'='	10000	nM	5			UO_0000065	7.99	0.16	4.33	2.48	FALSE	CHEMBL898907	Inhibition of SARS-CoV 3C-like protease by FRET based microplate assay	B	BAO_0000019	assay format	SARS coronavirus					CHEMBL5118	Replicase polyprotein 1ab	SARS coronavirus	SINGLE PROTEIN	CHEMBL1137503	1	Scientific Literature	Bioorg. Med. Chem. Lett.	2007
CHEMBL1392147		0	349.41	0	2.6	6, ZINC04384885	CCOc1ccc(S(=O)(=O)NCc2ccc3c(c2)OCO3)cc1C	IC50	'='	76700	nM	4.12			UO_0000065	11.78	0.23	1.52	5.57	FALSE	CHEMBL3107396	Inhibition of SARS coronavirus 3C-like protease using 5-FAM-TSATLQSGFRK(QXL520)-NH2 as substrate preincubated for 5 mins followed by substrate addition measured after 6 mins by FRET assay in presence of GSH	B	BAO_0000019	assay format	SARS coronavirus					CHEMBL5118	Replicase polyprotein 1ab	SARS coronavirus	SINGLE PROTEIN	CHEMBL3102752	1	Scientific Literature	Bioorg. Med. Chem.	2014
CHEMBL1487869		0	285.73	0	3.48	9, BAS05022400	Cn1cnc2cc(NC(=O)c3ccc(Cl)cc3)ccc21	Ki	'='	27500	nM	4.56			UO_0000065	15.96	0.31	1.08	9.72	FALSE	CHEMBL3107389	Competitive inhibition of SARS coronavirus 3C-like protease using 5-FAM-TSATLQSGFRK(QXL520)-NH2 as substrate by Dixon plot analysis	B	BAO_0000019	assay format	SARS coronavirus					CHEMBL5118	Replicase polyprotein 1ab	SARS coronavirus	SINGLE PROTEIN	CHEMBL3102752	1	Scientific Literature	Bioorg. Med. Chem.	2014
CHEMBL3105076		0	203.13	0	0.95	14, F2124-0890	Nc1ncnc2[nH]c(C(F)(F)F)nc12	IC50	'='	13900	nM	4.86			UO_0000065	23.91	0.47	3.91	6.04	FALSE	CHEMBL3107833	Inhibition of SARS coronavirus 3C-like protease using 5-FAM-TSATLQSGFRK(QXL520)-NH2 as substrate	B	BAO_0000019	assay format	SARS coronavirus					CHEMBL5118	Replicase polyprotein 1ab	SARS coronavirus	SINGLE PROTEIN	CHEMBL3102752	1	Scientific Literature	Bioorg. Med. Chem.	2014
CHEMBL3099547		0	413.5	0	1.39	8f1	CN1C(=O)C(=O)c2cc(S(=O)(=O)N3CCN(CCc4ccccc4)CC3)ccc21	IC50	'='	13860	nM	4.86			UO_0000065	11.75	0.23	3.47	6.23	FALSE	CHEMBL3102681	Inhibition of GST-tagged SARS coronavirus 3C-like protease by FRET assay	B	BAO_0000019	assay format	SARS coronavirus					CHEMBL5118	Replicase polyprotein 1ab	SARS coronavirus	SINGLE PROTEIN	CHEMBL3098093	1	Scientific Literature	Bioorg. Med. Chem.	2014
CHEMBL557291		0	502.64	1	3.41	14d	CCN(CC)C(=O)CC[C@H](NC(=O)[C@@H](NC(=O)OCc1ccccc1)C(C)C)C(=O)c1nccs1	Ki	'='	614000	nM		Outside typical range		UO_0000065					FALSE	CHEMBL1027049	Inhibition of SARS coronavirus 3CL protease pretreated for 10 mins before substrate addition	B	BAO_0000019	assay format	SARS coronavirus					CHEMBL5118	Replicase polyprotein 1ab	SARS coronavirus	SINGLE PROTEIN	CHEMBL1151865	1	Scientific Literature	Bioorg. Med. Chem. Lett.	2009
CHEMBL508791	DIECKOL	0	742.55	4	7.62	8	Oc1cc(O)cc(Oc2c(O)cc(O)c3c2Oc2c(O)cc(Oc4c(O)cc(Oc5c(O)cc(O)c6c5Oc5c(O)cc(O)cc5O6)cc4O)cc2O3)c1	Inhibition						Dose-dependent effect						FALSE	CHEMBL2395056	Inhibition of C-terminal His6-tagged recombinant SARS coronavirus 3C-like protease trans-cleavage activity expressed in Escherichia coli BL21 (DE3) using Dabcyl-KTSAVLQSGFRKME as substrate after 60 mins by FRET assay	B	BAO_0000019	assay format	SARS coronavirus					CHEMBL5118	Replicase polyprotein 1ab	SARS coronavirus	SINGLE PROTEIN	CHEMBL2390950	1	Scientific Literature	Bioorg. Med. Chem.	2013
CHEMBL510508	PHLOROFUCOFUROECKOL A	0	602.46	4	6.42	9	Oc1cc(O)cc(Oc2c(O)cc(O)c3c2Oc2c(O)cc4oc5c(Oc6cc(O)cc(O)c6)c(O)cc(O)c5c4c2O3)c1	Inhibition						Active						FALSE	CHEMBL2394459	Competitive inhibition of C-terminal His6-tagged recombinant SARS coronavirus 3C-like protease trans-cleavage activity expressed in Escherichia coli BL21 (DE3) using Dabcyl-KTSAVLQSGFRKME as substrate after 60 mins by Lineweaver-Burk plot analysis	B	BAO_0000019	assay format	SARS coronavirus					CHEMBL5118	Replicase polyprotein 1ab	SARS coronavirus	SINGLE PROTEIN	CHEMBL2390950	1	Scientific Literature	Bioorg. Med. Chem.	2013
CHEMBL456228		0	496.38	2	4.81	6	Oc1cc(O)cc(Oc2c(O)cc(O)c3c2Oc2c(O)cc(Oc4c(O)cc(O)cc4O)cc2O3)c1	Ki	'='	19300	nM	4.71			UO_0000065	9.5	0.18	-0.1	2.37	FALSE	CHEMBL2395055	Competitive inhibition of C-terminal His6-tagged recombinant SARS coronavirus 3C-like protease trans-cleavage activity expressed in Escherichia coli BL21 (DE3) using Dabcyl-KTSAVLQSGFRKME as substrate after 60 mins by Dixon plot analysis	B	BAO_0000019	assay format	SARS coronavirus					CHEMBL5118	Replicase polyprotein 1ab	SARS coronavirus	SINGLE PROTEIN	CHEMBL2390950	1	Scientific Literature	Bioorg. Med. Chem.	2013
CHEMBL508791	DIECKOL	0	742.55	4	7.62	8	Oc1cc(O)cc(Oc2c(O)cc(O)c3c2Oc2c(O)cc(Oc4c(O)cc(Oc5c(O)cc(O)c6c5Oc5c(O)cc(O)cc5O6)cc4O)cc2O3)c1	IC50	'='	2700	nM	5.57			UO_0000065	7.5	0.14	-2.05	1.94	FALSE	CHEMBL2395056	Inhibition of C-terminal His6-tagged recombinant SARS coronavirus 3C-like protease trans-cleavage activity expressed in Escherichia coli BL21 (DE3) using Dabcyl-KTSAVLQSGFRKME as substrate after 60 mins by FRET assay	B	BAO_0000019	assay format	SARS coronavirus					CHEMBL5118	Replicase polyprotein 1ab	SARS coronavirus	SINGLE PROTEIN	CHEMBL2390950	1	Scientific Literature	Bioorg. Med. Chem.	2013
CHEMBL559870	DIOXINODEHYDROECKOL	0	370.27	0	4.32	4	Oc1cc(O)c2oc3cc(O)c4oc5cc(O)cc(O)c5oc4c3oc2c1	Inhibition						Dose-dependent effect						FALSE	CHEMBL2394462	Inhibition of SARS coronavirus 3C-like protease cis-cleavage activity transfected in african green monkey Vero cells using SAVLQSGFRK as substrate after 5 hrs by luciferase reporter gene assay	B	BAO_0000219	cell-based format	SARS coronavirus			Vero		CHEMBL5118	Replicase polyprotein 1ab	SARS coronavirus	SINGLE PROTEIN	CHEMBL2390950	1	Scientific Literature	Bioorg. Med. Chem.	2013	CHEMBL3307520
CHEMBL471187	ECKOL	0	372.29	1	3.61	3	Oc1cc(O)cc(Oc2c(O)cc(O)c3c2Oc2c(O)cc(O)cc2O3)c1	Inhibition						Dose-dependent effect						FALSE	CHEMBL2395056	Inhibition of C-terminal His6-tagged recombinant SARS coronavirus 3C-like protease trans-cleavage activity expressed in Escherichia coli BL21 (DE3) using Dabcyl-KTSAVLQSGFRKME as substrate after 60 mins by FRET assay	B	BAO_0000019	assay format	SARS coronavirus					CHEMBL5118	Replicase polyprotein 1ab	SARS coronavirus	SINGLE PROTEIN	CHEMBL2390950	1	Scientific Literature	Bioorg. Med. Chem.	2013
CHEMBL399121	HESPERETIN	0	302.28	0	2.52	Hesperetin	COc1ccc([C@@H]2CC(=O)c3c(O)cc(O)cc3O2)cc1O	Kd	'='	24500	nM	4.61			UO_0000065	15.25	0.29	2.09	4.79	FALSE	CHEMBL2394460	Binding affinity to SARS coronavirus 3C-like protease by SPR analysis	B	BAO_0000019	assay format	SARS coronavirus					CHEMBL5118	Replicase polyprotein 1ab	SARS coronavirus	SINGLE PROTEIN	CHEMBL2390950	1	Scientific Literature	Bioorg. Med. Chem.	2013
CHEMBL2391423	2-PHLOROECKOL	0	496.38	2	4.81	5	Oc1cc(O)cc(Oc2c(Oc3c(O)cc(O)cc3O)cc(O)c3c2Oc2c(O)cc(O)cc2O3)c1	IC50	'='	13300	nM	4.88			UO_0000065	9.82	0.18	0.07	2.45	FALSE	CHEMBL2395056	Inhibition of C-terminal His6-tagged recombinant SARS coronavirus 3C-like protease trans-cleavage activity expressed in Escherichia coli BL21 (DE3) using Dabcyl-KTSAVLQSGFRKME as substrate after 60 mins by FRET assay	B	BAO_0000019	assay format	SARS coronavirus					CHEMBL5118	Replicase polyprotein 1ab	SARS coronavirus	SINGLE PROTEIN	CHEMBL2390950	1	Scientific Literature	Bioorg. Med. Chem.	2013
CHEMBL510508	PHLOROFUCOFUROECKOL A	0	602.46	4	6.42	9	Oc1cc(O)cc(Oc2c(O)cc(O)c3c2Oc2c(O)cc4oc5c(Oc6cc(O)cc(O)c6)c(O)cc(O)c5c4c2O3)c1	Ki	'='	10600	nM	4.97			UO_0000065	8.26	0.15	-1.45	2.14	FALSE	CHEMBL2395055	Competitive inhibition of C-terminal His6-tagged recombinant SARS coronavirus 3C-like protease trans-cleavage activity expressed in Escherichia coli BL21 (DE3) using Dabcyl-KTSAVLQSGFRKME as substrate after 60 mins by Dixon plot analysis	B	BAO_0000019	assay format	SARS coronavirus					CHEMBL5118	Replicase polyprotein 1ab	SARS coronavirus	SINGLE PROTEIN	CHEMBL2390950	1	Scientific Literature	Bioorg. Med. Chem.	2013
CHEMBL194398		0	580.68	1	2.69	1	CCOC(=O)/C=C/[C@H](C[C@@H]1CCNC1=O)NC(=O)[C@@H](CC(=O)[C@@H](NC(=O)c1cc(C)on1)C(C)C)Cc1ccccc1	IC50	'='	870000	nM		Outside typical range		UO_0000065					FALSE	CHEMBL898907	Inhibition of SARS-CoV 3C-like protease by FRET based microplate assay	B	BAO_0000019	assay format	SARS coronavirus					CHEMBL5118	Replicase polyprotein 1ab	SARS coronavirus	SINGLE PROTEIN	CHEMBL1137503	1	Scientific Literature	Bioorg. Med. Chem. Lett.	2007
CHEMBL196635		0	558.68	1	2.8	2	CCOC(=O)/C=C/[C@H](C[C@@H]1CCNC1=O)NC(=O)[C@H](CC=C(C)C)CC(=O)[C@@H](NC(=O)c1cc(C)on1)C(C)C	IC50	'='	800000	nM		Outside typical range		UO_0000065					FALSE	CHEMBL898907	Inhibition of SARS-CoV 3C-like protease by FRET based microplate assay	B	BAO_0000019	assay format	SARS coronavirus					CHEMBL5118	Replicase polyprotein 1ab	SARS coronavirus	SINGLE PROTEIN	CHEMBL1137503	1	Scientific Literature	Bioorg. Med. Chem. Lett.	2007
CHEMBL2441741		0	600.72	1	3.42	2	CC(C)C[C@H](NC(=O)[C@H](Cc1cccc2ccccc12)NC(=O)OCc1ccccc1)C(=O)N[C@H](C=O)C[C@@H]1CCNC1=O	IC50	'='	230	nM	6.64			UO_0000065	11.05	0.21	3.22	4.65	FALSE	CHEMBL2445771	Inhibition of SARS coronavirus 3C-like protease by FRET assay	B	BAO_0000019	assay format	SARS coronavirus					CHEMBL5118	Replicase polyprotein 1ab	SARS coronavirus	SINGLE PROTEIN	CHEMBL2439984	1	Scientific Literature	Bioorg. Med. Chem. Lett.	2013
CHEMBL3105074		0	366.28	0	2.86	12, F5882-7711	O=C(c1cncc(Br)c1)N1CCN(Cc2ccsc2)CC1	IC50	'='	24500	nM	4.61			UO_0000065	12.59	0.3	1.75	12.65	FALSE	CHEMBL3107396	Inhibition of SARS coronavirus 3C-like protease using 5-FAM-TSATLQSGFRK(QXL520)-NH2 as substrate preincubated for 5 mins followed by substrate addition measured after 6 mins by FRET assay in presence of GSH	B	BAO_0000019	assay format	SARS coronavirus					CHEMBL5118	Replicase polyprotein 1ab	SARS coronavirus	SINGLE PROTEIN	CHEMBL3102752	1	Scientific Literature	Bioorg. Med. Chem.	2014
CHEMBL554041	ALEXIDINE DIHYDROCHLORIDE	0	581.73	2	4.26	10, Prestw-777	CCCCC(CC)CNC(=N)NC(=N)NCCCCCCNC(=N)NC(=N)NCC(CC)CCCC.Cl.Cl	Activity						Not Active						FALSE	CHEMBL3107393	Binding affinity to SARS coronavirus 3C-like protease using 5-FAM-TSATLQSGFRK(QXL520)-NH2 as substrate by SPR analysis	B	BAO_0000019	assay format	SARS coronavirus					CHEMBL5118	Replicase polyprotein 1ab	SARS coronavirus	SINGLE PROTEIN	CHEMBL3102752	1	Scientific Literature	Bioorg. Med. Chem.	2014
CHEMBL510508	PHLOROFUCOFUROECKOL A	0	602.46	4	6.42	9	Oc1cc(O)cc(Oc2c(O)cc(O)c3c2Oc2c(O)cc4oc5c(Oc6cc(O)cc(O)c6)c(O)cc(O)c5c4c2O3)c1	IC50	'='	16700	nM	4.78			UO_0000065	7.93	0.15	-1.64	2.06	FALSE	CHEMBL2395056	Inhibition of C-terminal His6-tagged recombinant SARS coronavirus 3C-like protease trans-cleavage activity expressed in Escherichia coli BL21 (DE3) using Dabcyl-KTSAVLQSGFRKME as substrate after 60 mins by FRET assay	B	BAO_0000019	assay format	SARS coronavirus					CHEMBL5118	Replicase polyprotein 1ab	SARS coronavirus	SINGLE PROTEIN	CHEMBL2390950	1	Scientific Literature	Bioorg. Med. Chem.	2013
CHEMBL471187	ECKOL	0	372.29	1	3.61	3	Oc1cc(O)cc(Oc2c(O)cc(O)c3c2Oc2c(O)cc(O)cc2O3)c1	IC50	'='	8800	nM	5.06			UO_0000065	13.58	0.26	1.45	3.39	FALSE	CHEMBL2395056	Inhibition of C-terminal His6-tagged recombinant SARS coronavirus 3C-like protease trans-cleavage activity expressed in Escherichia coli BL21 (DE3) using Dabcyl-KTSAVLQSGFRKME as substrate after 60 mins by FRET assay	B	BAO_0000019	assay format	SARS coronavirus					CHEMBL5118	Replicase polyprotein 1ab	SARS coronavirus	SINGLE PROTEIN	CHEMBL2390950	1	Scientific Literature	Bioorg. Med. Chem.	2013
CHEMBL471187	ECKOL	0	372.29	1	3.61	3	Oc1cc(O)cc(Oc2c(O)cc(O)c3c2Oc2c(O)cc(O)cc2O3)c1	Ki	'='	8200	nM	5.09			UO_0000065	13.66	0.26	1.48	3.41	FALSE	CHEMBL2395055	Competitive inhibition of C-terminal His6-tagged recombinant SARS coronavirus 3C-like protease trans-cleavage activity expressed in Escherichia coli BL21 (DE3) using Dabcyl-KTSAVLQSGFRKME as substrate after 60 mins by Dixon plot analysis	B	BAO_0000019	assay format	SARS coronavirus					CHEMBL5118	Replicase polyprotein 1ab	SARS coronavirus	SINGLE PROTEIN	CHEMBL2390950	1	Scientific Literature	Bioorg. Med. Chem.	2013
CHEMBL2391422	TRIPHLORETHOL A	0	374.3	1	3.21	2	Oc1cc(O)cc(Oc2c(O)cc(Oc3c(O)cc(O)cc3O)cc2O)c1	Inhibition						Dose-dependent effect						FALSE	CHEMBL2395056	Inhibition of C-terminal His6-tagged recombinant SARS coronavirus 3C-like protease trans-cleavage activity expressed in Escherichia coli BL21 (DE3) using Dabcyl-KTSAVLQSGFRKME as substrate after 60 mins by FRET assay	B	BAO_0000019	assay format	SARS coronavirus					CHEMBL5118	Replicase polyprotein 1ab	SARS coronavirus	SINGLE PROTEIN	CHEMBL2390950	1	Scientific Literature	Bioorg. Med. Chem.	2013
CHEMBL456228		0	496.38	2	4.81	6	Oc1cc(O)cc(Oc2c(O)cc(O)c3c2Oc2c(O)cc(Oc4c(O)cc(O)cc4O)cc2O3)c1	IC50	'='	42100	nM	4.38			UO_0000065	8.82	0.17	-0.43	2.2	FALSE	CHEMBL2395056	Inhibition of C-terminal His6-tagged recombinant SARS coronavirus 3C-like protease trans-cleavage activity expressed in Escherichia coli BL21 (DE3) using Dabcyl-KTSAVLQSGFRKME as substrate after 60 mins by FRET assay	B	BAO_0000019	assay format	SARS coronavirus					CHEMBL5118	Replicase polyprotein 1ab	SARS coronavirus	SINGLE PROTEIN	CHEMBL2390950	1	Scientific Literature	Bioorg. Med. Chem.	2013
CHEMBL2316339		0	519.6	1	0.05	Mic-AVLQ-CN	Cc1cc(C(=O)N[C@@H](C)C(=O)N[C@H](C(=O)N[C@@H](CC(C)C)C(=O)N[C@H](C#N)CCC(N)=O)C(C)C)no1	IC50	'='	49000	nM	4.31			UO_0000065	8.29	0.16	4.26	2.06	FALSE	CHEMBL2321330	Inhibition of SARS coronavirus 3C-like protease pretreated for 5 mins before substrate addition by fluorimetry	B	BAO_0000019	assay format	SARS coronavirus					CHEMBL5118	Replicase polyprotein 1ab	SARS coronavirus	SINGLE PROTEIN	CHEMBL2311429	1	Scientific Literature	Eur. J. Med. Chem.	2013
CHEMBL2316337		0	544.65	1	1.25	Cbz-AVLQ-CN	CC(C)C[C@H](NC(=O)[C@@H](NC(=O)[C@H](C)NC(=O)OCc1ccccc1)C(C)C)C(=O)N[C@H](C#N)CCC(N)=O	IC50	'='	4600	nM	5.34			UO_0000065	9.8	0.19	4.09	2.77	FALSE	CHEMBL2321330	Inhibition of SARS coronavirus 3C-like protease pretreated for 5 mins before substrate addition by fluorimetry	B	BAO_0000019	assay format	SARS coronavirus					CHEMBL5118	Replicase polyprotein 1ab	SARS coronavirus	SINGLE PROTEIN	CHEMBL2311429	1	Scientific Literature	Eur. J. Med. Chem.	2013
CHEMBL2316336		0	732.84	3	-1.41	Cbz-TSAVLQ-CN	CC(C)C[C@H](NC(=O)[C@@H](NC(=O)[C@H](C)NC(=O)[C@H](CO)NC(=O)[C@@H](NC(=O)OCc1ccccc1)[C@@H](C)O)C(C)C)C(=O)N[C@H](C#N)CCC(N)=O	IC50	'='	39000	nM	4.41			UO_0000065	6.02	0.12	5.82	1.51	FALSE	CHEMBL2321330	Inhibition of SARS coronavirus 3C-like protease pretreated for 5 mins before substrate addition by fluorimetry	B	BAO_0000019	assay format	SARS coronavirus					CHEMBL5118	Replicase polyprotein 1ab	SARS coronavirus	SINGLE PROTEIN	CHEMBL2311429	1	Scientific Literature	Eur. J. Med. Chem.	2013
CHEMBL2316338		0	510.64	1	0.85	Boc-AVLQ-CN	CC(C)C[C@H](NC(=O)[C@@H](NC(=O)[C@H](C)NC(=O)OC(C)(C)C)C(C)C)C(=O)N[C@H](C#N)CCC(N)=O	IC50	'='	49000	nM	4.31			UO_0000065	8.44	0.16	3.46	2.24	FALSE	CHEMBL2321330	Inhibition of SARS coronavirus 3C-like protease pretreated for 5 mins before substrate addition by fluorimetry	B	BAO_0000019	assay format	SARS coronavirus					CHEMBL5118	Replicase polyprotein 1ab	SARS coronavirus	SINGLE PROTEIN	CHEMBL2311429	1	Scientific Literature	Eur. J. Med. Chem.	2013
CHEMBL4214066		0	496.61	0	1.74	9a	CC(C)C[C@H](NC(=O)OC1CCN(C(=O)OC(C)(C)C)CC1)C(=O)N[C@H](C=O)C[C@@H]1CCNC1=O	IC50	'='	2100	nM	5.68			UO_0000065	11.43	0.22	3.94	3.97	FALSE	CHEMBL4198706	Inhibition of SARS coronavirus 3CL protease using Dabcyl-KTSAVLQ/SGFRKME-Edans as substrate incubated for 30 mins followed by substrate addition measured after 1 hr by FRET assay	B	BAO_0000357	single protein format	SARS coronavirus					CHEMBL5118	Replicase polyprotein 1ab	SARS coronavirus	SINGLE PROTEIN	CHEMBL4196085	1	Scientific Literature	Eur J Med Chem	2018
CHEMBL4216101		0	628.72	1	1.52	10e	CCC1(OC(=O)N[C@@H](CC(C)C)C(=O)N[C@@H](C[C@@H]2CCNC2=O)C(O)S(=O)(=O)[O-])CCN(C(=O)OC(C)(C)C)CC1.[Na+]	IC50	'='	4100	nM	5.39			UO_0000065	8.88	0.18	3.87	2.68	FALSE	CHEMBL4198706	Inhibition of SARS coronavirus 3CL protease using Dabcyl-KTSAVLQ/SGFRKME-Edans as substrate incubated for 30 mins followed by substrate addition measured after 1 hr by FRET assay	B	BAO_0000357	single protein format	SARS coronavirus					CHEMBL5118	Replicase polyprotein 1ab	SARS coronavirus	SINGLE PROTEIN	CHEMBL4196085	1	Scientific Literature	Eur J Med Chem	2018
CHEMBL3818000		0	577.55	3	-6.98	page 4129, R47C1,cpd2	CC(=O)N[C@@H](CC(N)=O)C(=O)N[C@@H](CO)C(=O)N[C@H](C(=O)N[C@@H](CO)C(=O)N[C@@H](CCC(N)=O)C(=O)O)[C@@H](C)O	Ki	'='	40000	nM	4.4			UO_0000065	7.61	0.15	11.38	1.33	FALSE	CHEMBL3819982	Binding affinity to SARS coronavirus main proteinase 3C-like protease	B	BAO_0000019	assay format	SARS coronavirus					CHEMBL5118	Replicase polyprotein 1ab	SARS coronavirus	SINGLE PROTEIN	CHEMBL3817815	1	Scientific Literature	J. Med. Chem.	2016
CHEMBL3099544		0	323.37	0	-0.22	8a1	CN1CCN(S(=O)(=O)c2ccc3c(c2)C(=O)C(=O)N3C)CC1	IC50	'='	11830	nM	4.93			UO_0000065	15.24	0.31	5.15	6.32	FALSE	CHEMBL3102681	Inhibition of GST-tagged SARS coronavirus 3C-like protease by FRET assay	B	BAO_0000019	assay format	SARS coronavirus					CHEMBL5118	Replicase polyprotein 1ab	SARS coronavirus	SINGLE PROTEIN	CHEMBL3098093	1	Scientific Literature	Bioorg. Med. Chem.	2014
CHEMBL3099538		0	399.47	0	1.37	7f	O=C1Nc2ccc(S(=O)(=O)N3CCN(CCc4ccccc4)CC3)cc2C1=O	IC50	'='	34910	nM	4.46			UO_0000065	11.16	0.22	3.09	5.14	FALSE	CHEMBL3102681	Inhibition of GST-tagged SARS coronavirus 3C-like protease by FRET assay	B	BAO_0000019	assay format	SARS coronavirus					CHEMBL5118	Replicase polyprotein 1ab	SARS coronavirus	SINGLE PROTEIN	CHEMBL3098093	1	Scientific Literature	Bioorg. Med. Chem.	2014
CHEMBL3099534		0	389.41	0	1.47	7b	O=C1Nc2ccc(S(=O)(=O)N3CCN(c4ccc(F)cc4)CC3)cc2C1=O	IC50	'>'	100000	nM				UO_0000065					FALSE	CHEMBL3102681	Inhibition of GST-tagged SARS coronavirus 3C-like protease by FRET assay	B	BAO_0000019	assay format	SARS coronavirus					CHEMBL5118	Replicase polyprotein 1ab	SARS coronavirus	SINGLE PROTEIN	CHEMBL3098093	1	Scientific Literature	Bioorg. Med. Chem.	2014
CHEMBL3099528		0	448.54	0	3.99	8k3	CC1CCN(S(=O)(=O)c2ccc3c(c2)C(=O)C(=O)N3Cc2ccc3ccccc3c2)CC1	IC50	'='	17820	nM	4.75			UO_0000065	10.59	0.2	0.76	6.35	FALSE	CHEMBL3102681	Inhibition of GST-tagged SARS coronavirus 3C-like protease by FRET assay	B	BAO_0000019	assay format	SARS coronavirus					CHEMBL5118	Replicase polyprotein 1ab	SARS coronavirus	SINGLE PROTEIN	CHEMBL3098093	1	Scientific Literature	Bioorg. Med. Chem.	2014
CHEMBL508791	DIECKOL	0	742.55	4	7.62	8	Oc1cc(O)cc(Oc2c(O)cc(O)c3c2Oc2c(O)cc(Oc4c(O)cc(Oc5c(O)cc(O)c6c5Oc5c(O)cc(O)cc5O6)cc4O)cc2O3)c1	Activity						Dose-dependent effect						FALSE	CHEMBL2394460	Binding affinity to SARS coronavirus 3C-like protease by SPR analysis	B	BAO_0000019	assay format	SARS coronavirus					CHEMBL5118	Replicase polyprotein 1ab	SARS coronavirus	SINGLE PROTEIN	CHEMBL2390950	1	Scientific Literature	Bioorg. Med. Chem.	2013
CHEMBL456228		0	496.38	2	4.81	6	Oc1cc(O)cc(Oc2c(O)cc(O)c3c2Oc2c(O)cc(Oc4c(O)cc(O)cc4O)cc2O3)c1	Inhibition						Active						FALSE	CHEMBL2394459	Competitive inhibition of C-terminal His6-tagged recombinant SARS coronavirus 3C-like protease trans-cleavage activity expressed in Escherichia coli BL21 (DE3) using Dabcyl-KTSAVLQSGFRKME as substrate after 60 mins by Lineweaver-Burk plot analysis	B	BAO_0000019	assay format	SARS coronavirus					CHEMBL5118	Replicase polyprotein 1ab	SARS coronavirus	SINGLE PROTEIN	CHEMBL2390950	1	Scientific Literature	Bioorg. Med. Chem.	2013
CHEMBL510508	PHLOROFUCOFUROECKOL A	0	602.46	4	6.42	9	Oc1cc(O)cc(Oc2c(O)cc(O)c3c2Oc2c(O)cc4oc5c(Oc6cc(O)cc(O)c6)c(O)cc(O)c5c4c2O3)c1	IC50	'='	174600	nM		Outside typical range		UO_0000065					FALSE	CHEMBL2394462	Inhibition of SARS coronavirus 3C-like protease cis-cleavage activity transfected in african green monkey Vero cells using SAVLQSGFRK as substrate after 5 hrs by luciferase reporter gene assay	B	BAO_0000219	cell-based format	SARS coronavirus			Vero		CHEMBL5118	Replicase polyprotein 1ab	SARS coronavirus	SINGLE PROTEIN	CHEMBL2390950	1	Scientific Literature	Bioorg. Med. Chem.	2013	CHEMBL3307520
CHEMBL2391422	TRIPHLORETHOL A	0	374.3	1	3.21	2	Oc1cc(O)cc(Oc2c(O)cc(Oc3c(O)cc(O)cc3O)cc2O)c1	Inhibition	'='	15	%				UO_0000187					FALSE	CHEMBL2395049	Inhibition of SARS coronavirus 3C-like protease cis-cleavage activity transfected in african green monkey Vero cells using SAVLQSGFRK as substrate at 200 uM after 5 hrs by luciferase reporter gene assay relative to control	B	BAO_0000219	cell-based format	SARS coronavirus			Vero		CHEMBL5118	Replicase polyprotein 1ab	SARS coronavirus	SINGLE PROTEIN	CHEMBL2390950	1	Scientific Literature	Bioorg. Med. Chem.	2013	CHEMBL3307520
CHEMBL473159	PHLOROGLUCINOL	4	126.11	0	0.8	1	Oc1cc(O)cc(O)c1	IC50	'>'	200000	nM		Outside typical range		UO_0000065					FALSE	CHEMBL2395056	Inhibition of C-terminal His6-tagged recombinant SARS coronavirus 3C-like protease trans-cleavage activity expressed in Escherichia coli BL21 (DE3) using Dabcyl-KTSAVLQSGFRKME as substrate after 60 mins by FRET assay	B	BAO_0000019	assay format	SARS coronavirus					CHEMBL5118	Replicase polyprotein 1ab	SARS coronavirus	SINGLE PROTEIN	CHEMBL2390950	1	Scientific Literature	Bioorg. Med. Chem.	2013
CHEMBL3099541		0	308.36	0	1.24	7k	CC1CCN(S(=O)(=O)c2ccc3c(c2)C(=O)C(=O)N3)CC1	IC50	'='	1180	nM	5.93			UO_0000065	19.22	0.39	4.69	7.1	FALSE	CHEMBL3102681	Inhibition of GST-tagged SARS coronavirus 3C-like protease by FRET assay	B	BAO_0000019	assay format	SARS coronavirus					CHEMBL5118	Replicase polyprotein 1ab	SARS coronavirus	SINGLE PROTEIN	CHEMBL3098093	1	Scientific Literature	Bioorg. Med. Chem.	2014
CHEMBL484273		0	296.3	0	-0.16	7j	O=C1Nc2ccc(S(=O)(=O)N3CCOCC3)cc2C1=O	IC50	'='	12660	nM	4.9			UO_0000065	16.53	0.33	5.06	5.28	FALSE	CHEMBL3102681	Inhibition of GST-tagged SARS coronavirus 3C-like protease by FRET assay	B	BAO_0000019	assay format	SARS coronavirus					CHEMBL5118	Replicase polyprotein 1ab	SARS coronavirus	SINGLE PROTEIN	CHEMBL3098093	1	Scientific Literature	Bioorg. Med. Chem.	2014
CHEMBL3099546		0	449.53	0	2.51	8a3	CN1CCN(S(=O)(=O)c2ccc3c(c2)C(=O)C(=O)N3Cc2ccc3ccccc3c2)CC1	IC50	'='	82910	nM	4.08			UO_0000065	9.08	0.17	1.57	5.23	FALSE	CHEMBL3102681	Inhibition of GST-tagged SARS coronavirus 3C-like protease by FRET assay	B	BAO_0000019	assay format	SARS coronavirus					CHEMBL5118	Replicase polyprotein 1ab	SARS coronavirus	SINGLE PROTEIN	CHEMBL3098093	1	Scientific Literature	Bioorg. Med. Chem.	2014
CHEMBL3099540		0	372.41	0	0.73	7h	O=C1Nc2ccc(S(=O)(=O)N3CCN(c4ccccn4)CC3)cc2C1=O	IC50	'='	51330	nM	4.29			UO_0000065	11.52	0.23	3.56	4.3	FALSE	CHEMBL3102681	Inhibition of GST-tagged SARS coronavirus 3C-like protease by FRET assay	B	BAO_0000019	assay format	SARS coronavirus					CHEMBL5118	Replicase polyprotein 1ab	SARS coronavirus	SINGLE PROTEIN	CHEMBL3098093	1	Scientific Literature	Bioorg. Med. Chem.	2014
CHEMBL118305	5-NITROISATIN	0	192.13	0	0.73	3e	O=C1Nc2ccc([N+](=O)[O-])cc2C1=O	Inhibition	'='	93.96	%				UO_0000187					FALSE	CHEMBL3102682	Inhibition of GST-tagged SARS coronavirus 3C-like protease at 1 mM by FRET assay	B	BAO_0000019	assay format	SARS coronavirus					CHEMBL5118	Replicase polyprotein 1ab	SARS coronavirus	SINGLE PROTEIN	CHEMBL3098093	1	Scientific Literature	Bioorg. Med. Chem.	2014
CHEMBL116040	5-FLUOROISATIN	0	165.12	0	0.96	3d	O=C1Nc2ccc(F)cc2C1=O	Inhibition	'='	82.55	%				UO_0000187					FALSE	CHEMBL3102682	Inhibition of GST-tagged SARS coronavirus 3C-like protease at 1 mM by FRET assay	B	BAO_0000019	assay format	SARS coronavirus					CHEMBL5118	Replicase polyprotein 1ab	SARS coronavirus	SINGLE PROTEIN	CHEMBL3098093	1	Scientific Literature	Bioorg. Med. Chem.	2014
CHEMBL3099543		0	322.39	0	1.49	7m	CC1CC(C)CN(S(=O)(=O)c2ccc3c(c2)C(=O)C(=O)N3)C1	IC50	'='	4300	nM	5.37			UO_0000065	16.65	0.33	3.88	6.42	FALSE	CHEMBL3102681	Inhibition of GST-tagged SARS coronavirus 3C-like protease by FRET assay	B	BAO_0000019	assay format	SARS coronavirus					CHEMBL5118	Replicase polyprotein 1ab	SARS coronavirus	SINGLE PROTEIN	CHEMBL3098093	1	Scientific Literature	Bioorg. Med. Chem.	2014
CHEMBL510508	PHLOROFUCOFUROECKOL A	0	602.46	4	6.42	9	Oc1cc(O)cc(Oc2c(O)cc(O)c3c2Oc2c(O)cc4oc5c(Oc6cc(O)cc(O)c6)c(O)cc(O)c5c4c2O3)c1	Inhibition						Dose-dependent effect						FALSE	CHEMBL2394462	Inhibition of SARS coronavirus 3C-like protease cis-cleavage activity transfected in african green monkey Vero cells using SAVLQSGFRK as substrate after 5 hrs by luciferase reporter gene assay	B	BAO_0000219	cell-based format	SARS coronavirus			Vero		CHEMBL5118	Replicase polyprotein 1ab	SARS coronavirus	SINGLE PROTEIN	CHEMBL2390950	1	Scientific Literature	Bioorg. Med. Chem.	2013	CHEMBL3307520
CHEMBL2391423	2-PHLOROECKOL	0	496.38	2	4.81	5	Oc1cc(O)cc(Oc2c(Oc3c(O)cc(O)cc3O)cc(O)c3c2Oc2c(O)cc(O)cc2O3)c1	Inhibition						Dose-dependent effect						FALSE	CHEMBL2394462	Inhibition of SARS coronavirus 3C-like protease cis-cleavage activity transfected in african green monkey Vero cells using SAVLQSGFRK as substrate after 5 hrs by luciferase reporter gene assay	B	BAO_0000219	cell-based format	SARS coronavirus			Vero		CHEMBL5118	Replicase polyprotein 1ab	SARS coronavirus	SINGLE PROTEIN	CHEMBL2390950	1	Scientific Literature	Bioorg. Med. Chem.	2013	CHEMBL3307520
CHEMBL456228		0	496.38	2	4.81	6	Oc1cc(O)cc(Oc2c(O)cc(O)c3c2Oc2c(O)cc(Oc4c(O)cc(O)cc4O)cc2O3)c1	Inhibition						Dose-dependent effect						FALSE	CHEMBL2395056	Inhibition of C-terminal His6-tagged recombinant SARS coronavirus 3C-like protease trans-cleavage activity expressed in Escherichia coli BL21 (DE3) using Dabcyl-KTSAVLQSGFRKME as substrate after 60 mins by FRET assay	B	BAO_0000019	assay format	SARS coronavirus					CHEMBL5118	Replicase polyprotein 1ab	SARS coronavirus	SINGLE PROTEIN	CHEMBL2390950	1	Scientific Literature	Bioorg. Med. Chem.	2013
CHEMBL471187	ECKOL	0	372.29	1	3.61	3	Oc1cc(O)cc(Oc2c(O)cc(O)c3c2Oc2c(O)cc(O)cc2O3)c1	Inhibition						Active						FALSE	CHEMBL2394459	Competitive inhibition of C-terminal His6-tagged recombinant SARS coronavirus 3C-like protease trans-cleavage activity expressed in Escherichia coli BL21 (DE3) using Dabcyl-KTSAVLQSGFRKME as substrate after 60 mins by Lineweaver-Burk plot analysis	B	BAO_0000019	assay format	SARS coronavirus					CHEMBL5118	Replicase polyprotein 1ab	SARS coronavirus	SINGLE PROTEIN	CHEMBL2390950	1	Scientific Literature	Bioorg. Med. Chem.	2013
CHEMBL2391423	2-PHLOROECKOL	0	496.38	2	4.81	5	Oc1cc(O)cc(Oc2c(Oc3c(O)cc(O)cc3O)cc(O)c3c2Oc2c(O)cc(O)cc2O3)c1	IC50	'='	112200	nM		Outside typical range		UO_0000065					FALSE	CHEMBL2394462	Inhibition of SARS coronavirus 3C-like protease cis-cleavage activity transfected in african green monkey Vero cells using SAVLQSGFRK as substrate after 5 hrs by luciferase reporter gene assay	B	BAO_0000219	cell-based format	SARS coronavirus			Vero		CHEMBL5118	Replicase polyprotein 1ab	SARS coronavirus	SINGLE PROTEIN	CHEMBL2390950	1	Scientific Literature	Bioorg. Med. Chem.	2013	CHEMBL3307520
CHEMBL508791	DIECKOL	0	742.55	4	7.62	8	Oc1cc(O)cc(Oc2c(O)cc(O)c3c2Oc2c(O)cc(Oc4c(O)cc(Oc5c(O)cc(O)c6c5Oc5c(O)cc(O)cc5O6)cc4O)cc2O3)c1	Ratio IC50	'='	50										FALSE	CHEMBL2395052	Ratio of daidzein IC50 to compound IC50 for recombinant SARS coronavirus 3C-like protease trans-cleavage activity	B	BAO_0000019	assay format	SARS coronavirus					CHEMBL5118	Replicase polyprotein 1ab	SARS coronavirus	SINGLE PROTEIN	CHEMBL2390950	1	Scientific Literature	Bioorg. Med. Chem.	2013
CHEMBL1732790		0	296.37	0	3.04	3, ZINC02488140	OCCCc1nc2ccccc2n1CCOc1ccccc1	Activity						Not Active						FALSE	CHEMBL3107393	Binding affinity to SARS coronavirus 3C-like protease using 5-FAM-TSATLQSGFRK(QXL520)-NH2 as substrate by SPR analysis	B	BAO_0000019	assay format	SARS coronavirus					CHEMBL5118	Replicase polyprotein 1ab	SARS coronavirus	SINGLE PROTEIN	CHEMBL3102752	1	Scientific Literature	Bioorg. Med. Chem.	2014
CHEMBL3105076		0	203.13	0	0.95	14, F2124-0890	Nc1ncnc2[nH]c(C(F)(F)F)nc12	IC50	'='	20400	nM	4.69			UO_0000065	23.09	0.46	3.74	5.83	FALSE	CHEMBL3107396	Inhibition of SARS coronavirus 3C-like protease using 5-FAM-TSATLQSGFRK(QXL520)-NH2 as substrate preincubated for 5 mins followed by substrate addition measured after 6 mins by FRET assay in presence of GSH	B	BAO_0000019	assay format	SARS coronavirus					CHEMBL5118	Replicase polyprotein 1ab	SARS coronavirus	SINGLE PROTEIN	CHEMBL3102752	1	Scientific Literature	Bioorg. Med. Chem.	2014
CHEMBL3105075		0	485.7	1	7.34	13, F9995-0306	C(=C/c1ccccc1)\C[N+]1(C/C=C/c2ccccc2)CCN(C(c2ccccc2)c2ccccc2)CC1	IC50	'='	29800	nM	4.53			UO_0000065	9.32	0.17	-2.81	139.68	FALSE	CHEMBL3107397	Inhibition of SARS coronavirus 3C-like protease using 5-FAM-TSATLQSGFRK(QXL520)-NH2 as substrate preincubated for 5 mins followed by substrate addition measured after 6 mins by FRET assay	B	BAO_0000019	assay format	SARS coronavirus					CHEMBL5118	Replicase polyprotein 1ab	SARS coronavirus	SINGLE PROTEIN	CHEMBL3102752	1	Scientific Literature	Bioorg. Med. Chem.	2014
CHEMBL1478361		0	338.39	0	1.37	2, ZINC00331620	COc1ccc(N(CC(=O)NCc2ccco2)S(C)(=O)=O)cc1	IC50	'='	16100	nM	4.79			UO_0000065	14.16	0.28	3.42	5.39	FALSE	CHEMBL3107397	Inhibition of SARS coronavirus 3C-like protease using 5-FAM-TSATLQSGFRK(QXL520)-NH2 as substrate preincubated for 5 mins followed by substrate addition measured after 6 mins by FRET assay	B	BAO_0000019	assay format	SARS coronavirus					CHEMBL5118	Replicase polyprotein 1ab	SARS coronavirus	SINGLE PROTEIN	CHEMBL3102752	1	Scientific Literature	Bioorg. Med. Chem.	2014
CHEMBL3105072		0	334.29	0	3.23	7, ZINC01408189	Nc1ccc(F)c(S(=O)(=O)Nc2cccc(C(F)(F)F)c2)c1	IC50	'>'	200000	nM		Outside typical range		UO_0000065					FALSE	CHEMBL3107396	Inhibition of SARS coronavirus 3C-like protease using 5-FAM-TSATLQSGFRK(QXL520)-NH2 as substrate preincubated for 5 mins followed by substrate addition measured after 6 mins by FRET assay in presence of GSH	B	BAO_0000019	assay format	SARS coronavirus					CHEMBL5118	Replicase polyprotein 1ab	SARS coronavirus	SINGLE PROTEIN	CHEMBL3102752	1	Scientific Literature	Bioorg. Med. Chem.	2014
CHEMBL3105072		0	334.29	0	3.23	7, ZINC01408189	Nc1ccc(F)c(S(=O)(=O)Nc2cccc(C(F)(F)F)c2)c1	Inhibition						Not Active						FALSE	CHEMBL3107394	Inhibition of SARS coronavirus 3C-like protease using 5-FAM-TSATLQSGFRK(QXL520)-NH2 as substrate at 100 uM preincubated for 5 mins followed by substrate addition measured after 6 mins by FRET assay in presence of GSH relative to control	B	BAO_0000019	assay format	SARS coronavirus					CHEMBL5118	Replicase polyprotein 1ab	SARS coronavirus	SINGLE PROTEIN	CHEMBL3102752	1	Scientific Literature	Bioorg. Med. Chem.	2014
CHEMBL3817852		0	652.61	2	-4.04	page 4129, R59C1,cpd2	CC(=O)N[C@@H](CC(=O)O)C(=O)N[C@@H](CO)C(=O)N[C@@H](Cc1ccccc1)C(=O)N[C@@H](CC(=O)O)C(=O)N[C@@H](CCC(N)=O)C(=O)O	Ki	'='	41000	nM	4.39			UO_0000065	6.72	0.13	8.43	1.37	FALSE	CHEMBL3819982	Binding affinity to SARS coronavirus main proteinase 3C-like protease	B	BAO_0000019	assay format	SARS coronavirus					CHEMBL5118	Replicase polyprotein 1ab	SARS coronavirus	SINGLE PROTEIN	CHEMBL3817815	1	Scientific Literature	J. Med. Chem.	2016
CHEMBL3808558		0	470.36	0	4.69	3c, E/Z mixture	O=C(O)c1cccc(N2N=C(C(F)(F)F)/C(=C\c3ccc(-c4ccccc4C(=O)O)o3)C2=O)c1	IC50	'>'	50000	nM				UO_0000065					FALSE	CHEMBL3811446	Inhibition of SARS coronavirus recombinant 3CL-PRO expressed in Escherichia coli JM109 cells using Dabcyl-KTSAVLQSGFRKME-Edans as fluorogenic substrate by fluorometric assay	B	BAO_0000219	cell-based format	SARS coronavirus					CHEMBL5118	Replicase polyprotein 1ab	SARS coronavirus	SINGLE PROTEIN	CHEMBL3808339	1	Scientific Literature	Bioorg. Med. Chem.	2016
CHEMBL3809329		0	510.98	2	7.26	3h	CC(C)c1ccc(N2N=C(c3ccccc3)/C(=C/c3ccc(-c4cc(Cl)ccc4C(=O)O)o3)C2=O)cc1	IC50	'='	6000	nM	5.22			UO_0000065	10.22	0.19	-2.04	6.28	FALSE	CHEMBL3811446	Inhibition of SARS coronavirus recombinant 3CL-PRO expressed in Escherichia coli JM109 cells using Dabcyl-KTSAVLQSGFRKME-Edans as fluorogenic substrate by fluorometric assay	B	BAO_0000219	cell-based format	SARS coronavirus					CHEMBL5118	Replicase polyprotein 1ab	SARS coronavirus	SINGLE PROTEIN	CHEMBL3808339	1	Scientific Literature	Bioorg. Med. Chem.	2016
CHEMBL3809498		0	459.46	1	5.35	3q	N#Cc1ccc(N2N=C(c3ccccc3)/C(=C/c3ccc(-c4ccccc4C(=O)O)o3)C2=O)cc1	IC50	'='	18700	nM	4.73			UO_0000065	10.29	0.18	-0.62	4.42	FALSE	CHEMBL3811446	Inhibition of SARS coronavirus recombinant 3CL-PRO expressed in Escherichia coli JM109 cells using Dabcyl-KTSAVLQSGFRKME-Edans as fluorogenic substrate by fluorometric assay	B	BAO_0000219	cell-based format	SARS coronavirus					CHEMBL5118	Replicase polyprotein 1ab	SARS coronavirus	SINGLE PROTEIN	CHEMBL3808339	1	Scientific Literature	Bioorg. Med. Chem.	2016
CHEMBL3818400		0	604.61	2	-4.33	page 4129, R48C1,cpd2	CC(=O)N[C@@H](CC(=O)O)C(=O)N[C@@H](CO)C(=O)N[C@H](C(=O)N[C@@H](CC(C)C)C(=O)N[C@@H](CCC(N)=O)C(=O)O)[C@@H](C)O	IC50	'='	10000	nM	5			UO_0000065	8.27	0.16	9.33	1.65	FALSE	CHEMBL3819981	Inhibition of SARS coronavirus main proteinase 3C-like protease	B	BAO_0000019	assay format	SARS coronavirus					CHEMBL5118	Replicase polyprotein 1ab	SARS coronavirus	SINGLE PROTEIN	CHEMBL3817815	1	Scientific Literature	J. Med. Chem.	2016
CHEMBL61320		0	294.33	0	1	7i	O=C1Nc2ccc(S(=O)(=O)N3CCCCC3)cc2C1=O	IC50	'='	4450	nM	5.35			UO_0000065	18.18	0.37	4.35	6.41	FALSE	CHEMBL3102681	Inhibition of GST-tagged SARS coronavirus 3C-like protease by FRET assay	B	BAO_0000019	assay format	SARS coronavirus					CHEMBL5118	Replicase polyprotein 1ab	SARS coronavirus	SINGLE PROTEIN	CHEMBL3098093	1	Scientific Literature	Bioorg. Med. Chem.	2014
CHEMBL208034		0	191.14	0	0.52	3g	O=C1Nc2ccc(C(=O)O)cc2C1=O	Inhibition	'='	44.77	%				UO_0000187					FALSE	CHEMBL3102682	Inhibition of GST-tagged SARS coronavirus 3C-like protease at 1 mM by FRET assay	B	BAO_0000019	assay format	SARS coronavirus					CHEMBL5118	Replicase polyprotein 1ab	SARS coronavirus	SINGLE PROTEIN	CHEMBL3098093	1	Scientific Literature	Bioorg. Med. Chem.	2014
CHEMBL1876821		0	330.84	0	2.02	8, ZINC06559230	CN(CC(=O)NC1CCCC1)S(=O)(=O)c1cccc(Cl)c1	IC50	'>'	200000	nM		Outside typical range		UO_0000065					FALSE	CHEMBL3107396	Inhibition of SARS coronavirus 3C-like protease using 5-FAM-TSATLQSGFRK(QXL520)-NH2 as substrate preincubated for 5 mins followed by substrate addition measured after 6 mins by FRET assay in presence of GSH	B	BAO_0000019	assay format	SARS coronavirus					CHEMBL5118	Replicase polyprotein 1ab	SARS coronavirus	SINGLE PROTEIN	CHEMBL3102752	1	Scientific Literature	Bioorg. Med. Chem.	2014
CHEMBL1906723		0	325.37	0	2.33	1, ZINC01808425	COc1ccc(C(=O)Cn2c(NCCO)nc3ccccc32)cc1	Inhibition						Not Active						FALSE	CHEMBL3107394	Inhibition of SARS coronavirus 3C-like protease using 5-FAM-TSATLQSGFRK(QXL520)-NH2 as substrate at 100 uM preincubated for 5 mins followed by substrate addition measured after 6 mins by FRET assay in presence of GSH relative to control	B	BAO_0000019	assay format	SARS coronavirus					CHEMBL5118	Replicase polyprotein 1ab	SARS coronavirus	SINGLE PROTEIN	CHEMBL3102752	1	Scientific Literature	Bioorg. Med. Chem.	2014
CHEMBL473159	PHLOROGLUCINOL	4	126.11	0	0.8	1	Oc1cc(O)cc(O)c1	Ki						Not Determined						FALSE	CHEMBL2395055	Competitive inhibition of C-terminal His6-tagged recombinant SARS coronavirus 3C-like protease trans-cleavage activity expressed in Escherichia coli BL21 (DE3) using Dabcyl-KTSAVLQSGFRKME as substrate after 60 mins by Dixon plot analysis	B	BAO_0000019	assay format	SARS coronavirus					CHEMBL5118	Replicase polyprotein 1ab	SARS coronavirus	SINGLE PROTEIN	CHEMBL2390950	1	Scientific Literature	Bioorg. Med. Chem.	2013
CHEMBL473159	PHLOROGLUCINOL	4	126.11	0	0.8	1	Oc1cc(O)cc(O)c1	IC50						Not Determined						FALSE	CHEMBL2394462	Inhibition of SARS coronavirus 3C-like protease cis-cleavage activity transfected in african green monkey Vero cells using SAVLQSGFRK as substrate after 5 hrs by luciferase reporter gene assay	B	BAO_0000219	cell-based format	SARS coronavirus			Vero		CHEMBL5118	Replicase polyprotein 1ab	SARS coronavirus	SINGLE PROTEIN	CHEMBL2390950	1	Scientific Literature	Bioorg. Med. Chem.	2013	CHEMBL3307520
CHEMBL508791	DIECKOL	0	742.55	4	7.62	8	Oc1cc(O)cc(Oc2c(O)cc(O)c3c2Oc2c(O)cc(Oc4c(O)cc(Oc5c(O)cc(O)c6c5Oc5c(O)cc(O)cc5O6)cc4O)cc2O3)c1	Ratio IC50	'='	30										FALSE	CHEMBL2395053	Ratio of hesperetin IC50 to compound IC50 for recombinant SARS coronavirus 3C-like protease trans-cleavage activity	B	BAO_0000019	assay format	SARS coronavirus					CHEMBL5118	Replicase polyprotein 1ab	SARS coronavirus	SINGLE PROTEIN	CHEMBL2390950	1	Scientific Literature	Bioorg. Med. Chem.	2013
CHEMBL459393	FUCODIPHLOROETHOL G	0	498.4	2	3.99	7	Oc1cc(O)c(Oc2cc(O)cc(O)c2Oc2cc(O)cc(O)c2-c2c(O)cc(O)cc2O)c(O)c1	IC50	'='	22500	nM	4.65			UO_0000065	9.33	0.18	0.66	2.11	FALSE	CHEMBL2395056	Inhibition of C-terminal His6-tagged recombinant SARS coronavirus 3C-like protease trans-cleavage activity expressed in Escherichia coli BL21 (DE3) using Dabcyl-KTSAVLQSGFRKME as substrate after 60 mins by FRET assay	B	BAO_0000019	assay format	SARS coronavirus					CHEMBL5118	Replicase polyprotein 1ab	SARS coronavirus	SINGLE PROTEIN	CHEMBL2390950	1	Scientific Literature	Bioorg. Med. Chem.	2013
CHEMBL3810366		0	450.83	0	4.8	3a	CC1=NN(c2cccc(C(=O)O)c2)C(=O)/C1=C\c1ccc(-c2cc(Cl)ccc2C(=O)O)o1	IC50	'>'	50000	nM				UO_0000065					FALSE	CHEMBL3811446	Inhibition of SARS coronavirus recombinant 3CL-PRO expressed in Escherichia coli JM109 cells using Dabcyl-KTSAVLQSGFRKME-Edans as fluorogenic substrate by fluorometric assay	B	BAO_0000219	cell-based format	SARS coronavirus					CHEMBL5118	Replicase polyprotein 1ab	SARS coronavirus	SINGLE PROTEIN	CHEMBL3808339	1	Scientific Literature	Bioorg. Med. Chem.	2016
CHEMBL3809861		0	434.45	1	5.48	3k	O=C(O)c1cccc(N2N=C(c3ccccc3)/C(=C/c3ccc(-c4ccccc4)o3)C2=O)c1	IC50	'='	6400	nM	5.19			UO_0000065	11.95	0.21	-0.29	6.25	FALSE	CHEMBL3811446	Inhibition of SARS coronavirus recombinant 3CL-PRO expressed in Escherichia coli JM109 cells using Dabcyl-KTSAVLQSGFRKME-Edans as fluorogenic substrate by fluorometric assay	B	BAO_0000219	cell-based format	SARS coronavirus					CHEMBL5118	Replicase polyprotein 1ab	SARS coronavirus	SINGLE PROTEIN	CHEMBL3808339	1	Scientific Literature	Bioorg. Med. Chem.	2016
CHEMBL508791	DIECKOL	0	742.55	4	7.62	8	Oc1cc(O)cc(Oc2c(O)cc(O)c3c2Oc2c(O)cc(Oc4c(O)cc(Oc5c(O)cc(O)c6c5Oc5c(O)cc(O)cc5O6)cc4O)cc2O3)c1	Inhibition						Dose-dependent effect						FALSE	CHEMBL2394462	Inhibition of SARS coronavirus 3C-like protease cis-cleavage activity transfected in african green monkey Vero cells using SAVLQSGFRK as substrate after 5 hrs by luciferase reporter gene assay	B	BAO_0000219	cell-based format	SARS coronavirus			Vero		CHEMBL5118	Replicase polyprotein 1ab	SARS coronavirus	SINGLE PROTEIN	CHEMBL2390950	1	Scientific Literature	Bioorg. Med. Chem.	2013	CHEMBL3307520
CHEMBL2391423	2-PHLOROECKOL	0	496.38	2	4.81	5	Oc1cc(O)cc(Oc2c(Oc3c(O)cc(O)cc3O)cc(O)c3c2Oc2c(O)cc(O)cc2O3)c1	Inhibition						Dose-dependent effect						FALSE	CHEMBL2395056	Inhibition of C-terminal His6-tagged recombinant SARS coronavirus 3C-like protease trans-cleavage activity expressed in Escherichia coli BL21 (DE3) using Dabcyl-KTSAVLQSGFRKME as substrate after 60 mins by FRET assay	B	BAO_0000019	assay format	SARS coronavirus					CHEMBL5118	Replicase polyprotein 1ab	SARS coronavirus	SINGLE PROTEIN	CHEMBL2390950	1	Scientific Literature	Bioorg. Med. Chem.	2013
CHEMBL459393	FUCODIPHLOROETHOL G	0	498.4	2	3.99	7	Oc1cc(O)c(Oc2cc(O)cc(O)c2Oc2cc(O)cc(O)c2-c2c(O)cc(O)cc2O)c(O)c1	IC50	'='	177100	nM		Outside typical range		UO_0000065					FALSE	CHEMBL2394462	Inhibition of SARS coronavirus 3C-like protease cis-cleavage activity transfected in african green monkey Vero cells using SAVLQSGFRK as substrate after 5 hrs by luciferase reporter gene assay	B	BAO_0000219	cell-based format	SARS coronavirus			Vero		CHEMBL5118	Replicase polyprotein 1ab	SARS coronavirus	SINGLE PROTEIN	CHEMBL2390950	1	Scientific Literature	Bioorg. Med. Chem.	2013	CHEMBL3307520
CHEMBL2391422	TRIPHLORETHOL A	0	374.3	1	3.21	2	Oc1cc(O)cc(Oc2c(O)cc(Oc3c(O)cc(O)cc3O)cc2O)c1	IC50	'='	164700	nM		Outside typical range		UO_0000065					FALSE	CHEMBL2395056	Inhibition of C-terminal His6-tagged recombinant SARS coronavirus 3C-like protease trans-cleavage activity expressed in Escherichia coli BL21 (DE3) using Dabcyl-KTSAVLQSGFRKME as substrate after 60 mins by FRET assay	B	BAO_0000019	assay format	SARS coronavirus					CHEMBL5118	Replicase polyprotein 1ab	SARS coronavirus	SINGLE PROTEIN	CHEMBL2390950	1	Scientific Literature	Bioorg. Med. Chem.	2013
CHEMBL559870	DIOXINODEHYDROECKOL	0	370.27	0	4.32	4	Oc1cc(O)c2oc3cc(O)c4oc5cc(O)cc(O)c5oc4c3oc2c1	IC50	'='	158300	nM		Outside typical range		UO_0000065					FALSE	CHEMBL2395056	Inhibition of C-terminal His6-tagged recombinant SARS coronavirus 3C-like protease trans-cleavage activity expressed in Escherichia coli BL21 (DE3) using Dabcyl-KTSAVLQSGFRKME as substrate after 60 mins by FRET assay	B	BAO_0000019	assay format	SARS coronavirus					CHEMBL5118	Replicase polyprotein 1ab	SARS coronavirus	SINGLE PROTEIN	CHEMBL2390950	1	Scientific Literature	Bioorg. Med. Chem.	2013
CHEMBL508791	DIECKOL	0	742.55	4	7.62	8	Oc1cc(O)cc(Oc2c(O)cc(O)c3c2Oc2c(O)cc(Oc4c(O)cc(Oc5c(O)cc(O)c6c5Oc5c(O)cc(O)cc5O6)cc4O)cc2O3)c1	Ki	'='	2400	nM	5.62			UO_0000065	7.57	0.14	-2	1.96	FALSE	CHEMBL2395055	Competitive inhibition of C-terminal His6-tagged recombinant SARS coronavirus 3C-like protease trans-cleavage activity expressed in Escherichia coli BL21 (DE3) using Dabcyl-KTSAVLQSGFRKME as substrate after 60 mins by Dixon plot analysis	B	BAO_0000019	assay format	SARS coronavirus					CHEMBL5118	Replicase polyprotein 1ab	SARS coronavirus	SINGLE PROTEIN	CHEMBL2390950	1	Scientific Literature	Bioorg. Med. Chem.	2013
CHEMBL459393	FUCODIPHLOROETHOL G	0	498.4	2	3.99	7	Oc1cc(O)c(Oc2cc(O)cc(O)c2Oc2cc(O)cc(O)c2-c2c(O)cc(O)cc2O)c(O)c1	Inhibition						Dose-dependent effect						FALSE	CHEMBL2394462	Inhibition of SARS coronavirus 3C-like protease cis-cleavage activity transfected in african green monkey Vero cells using SAVLQSGFRK as substrate after 5 hrs by luciferase reporter gene assay	B	BAO_0000219	cell-based format	SARS coronavirus			Vero		CHEMBL5118	Replicase polyprotein 1ab	SARS coronavirus	SINGLE PROTEIN	CHEMBL2390950	1	Scientific Literature	Bioorg. Med. Chem.	2013	CHEMBL3307520
CHEMBL2391423	2-PHLOROECKOL	0	496.38	2	4.81	5	Oc1cc(O)cc(Oc2c(Oc3c(O)cc(O)cc3O)cc(O)c3c2Oc2c(O)cc(O)cc2O3)c1	Inhibition						Active						FALSE	CHEMBL2394459	Competitive inhibition of C-terminal His6-tagged recombinant SARS coronavirus 3C-like protease trans-cleavage activity expressed in Escherichia coli BL21 (DE3) using Dabcyl-KTSAVLQSGFRKME as substrate after 60 mins by Lineweaver-Burk plot analysis	B	BAO_0000019	assay format	SARS coronavirus					CHEMBL5118	Replicase polyprotein 1ab	SARS coronavirus	SINGLE PROTEIN	CHEMBL2390950	1	Scientific Literature	Bioorg. Med. Chem.	2013
CHEMBL559870	DIOXINODEHYDROECKOL	0	370.27	0	4.32	4	Oc1cc(O)c2oc3cc(O)c4oc5cc(O)cc(O)c5oc4c3oc2c1	IC50	'='	146500	nM		Outside typical range		UO_0000065					FALSE	CHEMBL2394462	Inhibition of SARS coronavirus 3C-like protease cis-cleavage activity transfected in african green monkey Vero cells using SAVLQSGFRK as substrate after 5 hrs by luciferase reporter gene assay	B	BAO_0000219	cell-based format	SARS coronavirus			Vero		CHEMBL5118	Replicase polyprotein 1ab	SARS coronavirus	SINGLE PROTEIN	CHEMBL2390950	1	Scientific Literature	Bioorg. Med. Chem.	2013	CHEMBL3307520
CHEMBL459393	FUCODIPHLOROETHOL G	0	498.4	2	3.99	7	Oc1cc(O)c(Oc2cc(O)cc(O)c2Oc2cc(O)cc(O)c2-c2c(O)cc(O)cc2O)c(O)c1	Inhibition						Active						FALSE	CHEMBL2394459	Competitive inhibition of C-terminal His6-tagged recombinant SARS coronavirus 3C-like protease trans-cleavage activity expressed in Escherichia coli BL21 (DE3) using Dabcyl-KTSAVLQSGFRKME as substrate after 60 mins by Lineweaver-Burk plot analysis	B	BAO_0000019	assay format	SARS coronavirus					CHEMBL5118	Replicase polyprotein 1ab	SARS coronavirus	SINGLE PROTEIN	CHEMBL2390950	1	Scientific Literature	Bioorg. Med. Chem.	2013
CHEMBL508791	DIECKOL	0	742.55	4	7.62	8	Oc1cc(O)cc(Oc2c(O)cc(O)c3c2Oc2c(O)cc(Oc4c(O)cc(Oc5c(O)cc(O)c6c5Oc5c(O)cc(O)cc5O6)cc4O)cc2O3)c1	Ratio IC50	'='	60										FALSE	CHEMBL2395051	Ratio of aloeemodin IC50 to compound IC50 for recombinant SARS coronavirus 3C-like protease trans-cleavage activity	B	BAO_0000019	assay format	SARS coronavirus					CHEMBL5118	Replicase polyprotein 1ab	SARS coronavirus	SINGLE PROTEIN	CHEMBL2390950	1	Scientific Literature	Bioorg. Med. Chem.	2013
CHEMBL459393	FUCODIPHLOROETHOL G	0	498.4	2	3.99	7	Oc1cc(O)c(Oc2cc(O)cc(O)c2Oc2cc(O)cc(O)c2-c2c(O)cc(O)cc2O)c(O)c1	Ki	'='	63500	nM	4.2			UO_0000065	8.42	0.16	0.21	1.9	FALSE	CHEMBL2395055	Competitive inhibition of C-terminal His6-tagged recombinant SARS coronavirus 3C-like protease trans-cleavage activity expressed in Escherichia coli BL21 (DE3) using Dabcyl-KTSAVLQSGFRKME as substrate after 60 mins by Dixon plot analysis	B	BAO_0000019	assay format	SARS coronavirus					CHEMBL5118	Replicase polyprotein 1ab	SARS coronavirus	SINGLE PROTEIN	CHEMBL2390950	1	Scientific Literature	Bioorg. Med. Chem.	2013
CHEMBL3808795		0	512.91	2	5.83	3d	O=C(O)c1cccc(N2N=C(c3ccccc3)/C(=C/c3ccc(-c4cc(Cl)ccc4C(=O)O)o3)C2=O)c1	IC50	'='	44700	nM	4.35			UO_0000065	8.48	0.16	-1.48	3.61	FALSE	CHEMBL3811446	Inhibition of SARS coronavirus recombinant 3CL-PRO expressed in Escherichia coli JM109 cells using Dabcyl-KTSAVLQSGFRKME-Edans as fluorogenic substrate by fluorometric assay	B	BAO_0000219	cell-based format	SARS coronavirus					CHEMBL5118	Replicase polyprotein 1ab	SARS coronavirus	SINGLE PROTEIN	CHEMBL3808339	1	Scientific Literature	Bioorg. Med. Chem.	2016
CHEMBL3810361		0	434.45	1	5.48	3m	O=C(O)c1ccccc1-c1ccc(/C=C2\C(=O)N(c3ccccc3)N=C2c2ccccc2)o1	IC50	'='	41200	nM	4.38			UO_0000065	10.09	0.18	-1.09	5.28	FALSE	CHEMBL3811446	Inhibition of SARS coronavirus recombinant 3CL-PRO expressed in Escherichia coli JM109 cells using Dabcyl-KTSAVLQSGFRKME-Edans as fluorogenic substrate by fluorometric assay	B	BAO_0000219	cell-based format	SARS coronavirus					CHEMBL5118	Replicase polyprotein 1ab	SARS coronavirus	SINGLE PROTEIN	CHEMBL3808339	1	Scientific Literature	Bioorg. Med. Chem.	2016
CHEMBL3809506		0	476.53	1	6.6	3o	CC(C)c1ccc(N2N=C(c3ccccc3)/C(=C/c3ccc(-c4ccccc4C(=O)O)o3)C2=O)cc1	IC50	'='	11700	nM	4.93			UO_0000065	10.35	0.19	-1.67	5.93	FALSE	CHEMBL3811446	Inhibition of SARS coronavirus recombinant 3CL-PRO expressed in Escherichia coli JM109 cells using Dabcyl-KTSAVLQSGFRKME-Edans as fluorogenic substrate by fluorometric assay	B	BAO_0000219	cell-based format	SARS coronavirus					CHEMBL5118	Replicase polyprotein 1ab	SARS coronavirus	SINGLE PROTEIN	CHEMBL3808339	1	Scientific Literature	Bioorg. Med. Chem.	2016
CHEMBL3099533		0	309.35	0	-0.24	7a	CN1CCN(S(=O)(=O)c2ccc3c(c2)C(=O)C(=O)N3)CC1	IC50	'='	76740	nM	4.12			UO_0000065	13.3	0.27	4.35	4.74	FALSE	CHEMBL3102681	Inhibition of GST-tagged SARS coronavirus 3C-like protease by FRET assay	B	BAO_0000019	assay format	SARS coronavirus					CHEMBL5118	Replicase polyprotein 1ab	SARS coronavirus	SINGLE PROTEIN	CHEMBL3098093	1	Scientific Literature	Bioorg. Med. Chem.	2014
CHEMBL3099523		0	310.33	0	-0.13	8j1	CN1C(=O)C(=O)c2cc(S(=O)(=O)N3CCOCC3)ccc21	IC50	'='	9910	nM	5			UO_0000065	16.12	0.33	5.13	5.96	FALSE	CHEMBL3102681	Inhibition of GST-tagged SARS coronavirus 3C-like protease by FRET assay	B	BAO_0000019	assay format	SARS coronavirus					CHEMBL5118	Replicase polyprotein 1ab	SARS coronavirus	SINGLE PROTEIN	CHEMBL3098093	1	Scientific Literature	Bioorg. Med. Chem.	2014
CHEMBL3105075		0	485.7	1	7.34	13, F9995-0306	C(=C/c1ccccc1)\C[N+]1(C/C=C/c2ccccc2)CCN(C(c2ccccc2)c2ccccc2)CC1	Activity						Active						FALSE	CHEMBL3107391	Binding affinity to SARS coronavirus 3C-like protease using 5-FAM-TSATLQSGFRK(QXL520)-NH2 as substrate up to 200 uM by SPR analysis	B	BAO_0000019	assay format	SARS coronavirus					CHEMBL5118	Replicase polyprotein 1ab	SARS coronavirus	SINGLE PROTEIN	CHEMBL3102752	1	Scientific Literature	Bioorg. Med. Chem.	2014
CHEMBL1478361		0	338.39	0	1.37	2, ZINC00331620	COc1ccc(N(CC(=O)NCc2ccco2)S(C)(=O)=O)cc1	Activity						Not Active						FALSE	CHEMBL3107392	Binding affinity to SARS coronavirus 3C-like protease using 5-FAM-TSATLQSGFRK(QXL520)-NH2 as substrate up to 90 uM by SPR analysis	B	BAO_0000019	assay format	SARS coronavirus					CHEMBL5118	Replicase polyprotein 1ab	SARS coronavirus	SINGLE PROTEIN	CHEMBL3102752	1	Scientific Literature	Bioorg. Med. Chem.	2014
CHEMBL1488602		0	278.35	0	1.62	4, ZINC02842242	COCCOCCn1c(CCCO)nc2ccccc21	Inhibition						Not Active						FALSE	CHEMBL3107395	Inhibition of SARS coronavirus 3C-like protease using 5-FAM-TSATLQSGFRK(QXL520)-NH2 as substrate at 100 uM preincubated for 5 mins followed by substrate addition measured after 6 mins by FRET assay relative to control	B	BAO_0000019	assay format	SARS coronavirus					CHEMBL5118	Replicase polyprotein 1ab	SARS coronavirus	SINGLE PROTEIN	CHEMBL3102752	1	Scientific Literature	Bioorg. Med. Chem.	2014
CHEMBL554041	ALEXIDINE DIHYDROCHLORIDE	0	581.73	2	4.26	10, Prestw-777	CCCCC(CC)CNC(=N)NC(=N)NCCCCCCNC(=N)NC(=N)NCC(CC)CCCC.Cl.Cl	IC50	'='	24500	nM	4.61			UO_0000065	9.06	0.17	0.35	2.75	FALSE	CHEMBL3107397	Inhibition of SARS coronavirus 3C-like protease using 5-FAM-TSATLQSGFRK(QXL520)-NH2 as substrate preincubated for 5 mins followed by substrate addition measured after 6 mins by FRET assay	B	BAO_0000019	assay format	SARS coronavirus					CHEMBL5118	Replicase polyprotein 1ab	SARS coronavirus	SINGLE PROTEIN	CHEMBL3102752	1	Scientific Literature	Bioorg. Med. Chem.	2014
CHEMBL1487869		0	285.73	0	3.48	9, BAS05022400	Cn1cnc2cc(NC(=O)c3ccc(Cl)cc3)ccc21	Activity	'>'	50	%				UO_0000187					FALSE	CHEMBL3107390	Reversible inhibition of SARS coronavirus 3C-like protease using 5-FAM-TSATLQSGFRK(QXL520)-NH2 as substrate assessed as recovery rate at 20 x IC50 preincubated for 1 hr followed by compound washout by FRET assay in presence of GSH	B	BAO_0000019	assay format	SARS coronavirus					CHEMBL5118	Replicase polyprotein 1ab	SARS coronavirus	SINGLE PROTEIN	CHEMBL3102752	1	Scientific Literature	Bioorg. Med. Chem.	2014
CHEMBL2391422	TRIPHLORETHOL A	0	374.3	1	3.21	2	Oc1cc(O)cc(Oc2c(O)cc(Oc3c(O)cc(O)cc3O)cc2O)c1	Ki						Not Determined						FALSE	CHEMBL2395055	Competitive inhibition of C-terminal His6-tagged recombinant SARS coronavirus 3C-like protease trans-cleavage activity expressed in Escherichia coli BL21 (DE3) using Dabcyl-KTSAVLQSGFRKME as substrate after 60 mins by Dixon plot analysis	B	BAO_0000019	assay format	SARS coronavirus					CHEMBL5118	Replicase polyprotein 1ab	SARS coronavirus	SINGLE PROTEIN	CHEMBL2390950	1	Scientific Literature	Bioorg. Med. Chem.	2013
CHEMBL1392147		0	349.41	0	2.6	6, ZINC04384885	CCOc1ccc(S(=O)(=O)NCc2ccc3c(c2)OCO3)cc1C	Inhibition						Not Active						FALSE	CHEMBL3107395	Inhibition of SARS coronavirus 3C-like protease using 5-FAM-TSATLQSGFRK(QXL520)-NH2 as substrate at 100 uM preincubated for 5 mins followed by substrate addition measured after 6 mins by FRET assay relative to control	B	BAO_0000019	assay format	SARS coronavirus					CHEMBL5118	Replicase polyprotein 1ab	SARS coronavirus	SINGLE PROTEIN	CHEMBL3102752	1	Scientific Literature	Bioorg. Med. Chem.	2014
CHEMBL1488602		0	278.35	0	1.62	4, ZINC02842242	COCCOCCn1c(CCCO)nc2ccccc21	Inhibition						Not Active						FALSE	CHEMBL3107394	Inhibition of SARS coronavirus 3C-like protease using 5-FAM-TSATLQSGFRK(QXL520)-NH2 as substrate at 100 uM preincubated for 5 mins followed by substrate addition measured after 6 mins by FRET assay in presence of GSH relative to control	B	BAO_0000019	assay format	SARS coronavirus					CHEMBL5118	Replicase polyprotein 1ab	SARS coronavirus	SINGLE PROTEIN	CHEMBL3102752	1	Scientific Literature	Bioorg. Med. Chem.	2014
CHEMBL1478361		0	338.39	0	1.37	2, ZINC00331620	COc1ccc(N(CC(=O)NCc2ccco2)S(C)(=O)=O)cc1	Inhibition						Not Active						FALSE	CHEMBL3107395	Inhibition of SARS coronavirus 3C-like protease using 5-FAM-TSATLQSGFRK(QXL520)-NH2 as substrate at 100 uM preincubated for 5 mins followed by substrate addition measured after 6 mins by FRET assay relative to control	B	BAO_0000019	assay format	SARS coronavirus					CHEMBL5118	Replicase polyprotein 1ab	SARS coronavirus	SINGLE PROTEIN	CHEMBL3102752	1	Scientific Literature	Bioorg. Med. Chem.	2014
CHEMBL1392147		0	349.41	0	2.6	6, ZINC04384885	CCOc1ccc(S(=O)(=O)NCc2ccc3c(c2)OCO3)cc1C	IC50	'>'	200000	nM		Outside typical range		UO_0000065					FALSE	CHEMBL3107397	Inhibition of SARS coronavirus 3C-like protease using 5-FAM-TSATLQSGFRK(QXL520)-NH2 as substrate preincubated for 5 mins followed by substrate addition measured after 6 mins by FRET assay	B	BAO_0000019	assay format	SARS coronavirus					CHEMBL5118	Replicase polyprotein 1ab	SARS coronavirus	SINGLE PROTEIN	CHEMBL3102752	1	Scientific Literature	Bioorg. Med. Chem.	2014
CHEMBL3105074		0	366.28	0	2.86	12, F5882-7711	O=C(c1cncc(Br)c1)N1CCN(Cc2ccsc2)CC1	Activity						Not Active						FALSE	CHEMBL3107393	Binding affinity to SARS coronavirus 3C-like protease using 5-FAM-TSATLQSGFRK(QXL520)-NH2 as substrate by SPR analysis	B	BAO_0000019	assay format	SARS coronavirus					CHEMBL5118	Replicase polyprotein 1ab	SARS coronavirus	SINGLE PROTEIN	CHEMBL3102752	1	Scientific Literature	Bioorg. Med. Chem.	2014
CHEMBL3099530		0	412.51	0	3.08	8m2	CC1CC(C)CN(S(=O)(=O)c2ccc3c(c2)C(=O)C(=O)N3Cc2ccccc2)C1	IC50	'='	4700	nM	5.33			UO_0000065	12.92	0.25	2.25	7.13	FALSE	CHEMBL3102681	Inhibition of GST-tagged SARS coronavirus 3C-like protease by FRET assay	B	BAO_0000019	assay format	SARS coronavirus					CHEMBL5118	Replicase polyprotein 1ab	SARS coronavirus	SINGLE PROTEIN	CHEMBL3098093	1	Scientific Literature	Bioorg. Med. Chem.	2014
CHEMBL3099526		0	322.39	0	1.27	8k1	CC1CCN(S(=O)(=O)c2ccc3c(c2)C(=O)C(=O)N3C)CC1	IC50	'='	1040	nM	5.98			UO_0000065	18.56	0.37	4.71	8	FALSE	CHEMBL3102681	Inhibition of GST-tagged SARS coronavirus 3C-like protease by FRET assay	B	BAO_0000019	assay format	SARS coronavirus					CHEMBL5118	Replicase polyprotein 1ab	SARS coronavirus	SINGLE PROTEIN	CHEMBL3098093	1	Scientific Literature	Bioorg. Med. Chem.	2014
CHEMBL3099522		0	384.46	0	2.59	8i2	O=C1C(=O)N(Cc2ccccc2)c2ccc(S(=O)(=O)N3CCCCC3)cc21	IC50	'='	14000	nM	4.85			UO_0000065	12.63	0.25	2.26	6.49	FALSE	CHEMBL3102681	Inhibition of GST-tagged SARS coronavirus 3C-like protease by FRET assay	B	BAO_0000019	assay format	SARS coronavirus					CHEMBL5118	Replicase polyprotein 1ab	SARS coronavirus	SINGLE PROTEIN	CHEMBL3098093	1	Scientific Literature	Bioorg. Med. Chem.	2014
CHEMBL3105076		0	203.13	0	0.95	14, F2124-0890	Nc1ncnc2[nH]c(C(F)(F)F)nc12	Ki	'='	11100	nM	4.96			UO_0000065	24.39	0.48	4	6.16	FALSE	CHEMBL3107388	Mixed-type inhibition of SARS coronavirus 3C-like protease using 5-FAM-TSATLQSGFRK(QXL520)-NH2 as substrate assessed as enzyme-inhibitor complex by Dixon plot analysis	B	BAO_0000019	assay format	SARS coronavirus					CHEMBL5118	Replicase polyprotein 1ab	SARS coronavirus	SINGLE PROTEIN	CHEMBL3102752	1	Scientific Literature	Bioorg. Med. Chem.	2014
CHEMBL3105074		0	366.28	0	2.86	12, F5882-7711	O=C(c1cncc(Br)c1)N1CCN(Cc2ccsc2)CC1	IC50	'='	10800	nM	4.97			UO_0000065	13.56	0.32	2.11	13.63	FALSE	CHEMBL3107397	Inhibition of SARS coronavirus 3C-like protease using 5-FAM-TSATLQSGFRK(QXL520)-NH2 as substrate preincubated for 5 mins followed by substrate addition measured after 6 mins by FRET assay	B	BAO_0000019	assay format	SARS coronavirus					CHEMBL5118	Replicase polyprotein 1ab	SARS coronavirus	SINGLE PROTEIN	CHEMBL3102752	1	Scientific Literature	Bioorg. Med. Chem.	2014
CHEMBL1392147		0	349.41	0	2.6	6, ZINC04384885	CCOc1ccc(S(=O)(=O)NCc2ccc3c(c2)OCO3)cc1C	Activity	'>'	50	%				UO_0000187					FALSE	CHEMBL3107390	Reversible inhibition of SARS coronavirus 3C-like protease using 5-FAM-TSATLQSGFRK(QXL520)-NH2 as substrate assessed as recovery rate at 20 x IC50 preincubated for 1 hr followed by compound washout by FRET assay in presence of GSH	B	BAO_0000019	assay format	SARS coronavirus					CHEMBL5118	Replicase polyprotein 1ab	SARS coronavirus	SINGLE PROTEIN	CHEMBL3102752	1	Scientific Literature	Bioorg. Med. Chem.	2014
CHEMBL1487869		0	285.73	0	3.48	9, BAS05022400	Cn1cnc2cc(NC(=O)c3ccc(Cl)cc3)ccc21	IC50	'='	27600	nM	4.56			UO_0000065	15.96	0.31	1.08	9.72	FALSE	CHEMBL3107397	Inhibition of SARS coronavirus 3C-like protease using 5-FAM-TSATLQSGFRK(QXL520)-NH2 as substrate preincubated for 5 mins followed by substrate addition measured after 6 mins by FRET assay	B	BAO_0000019	assay format	SARS coronavirus					CHEMBL5118	Replicase polyprotein 1ab	SARS coronavirus	SINGLE PROTEIN	CHEMBL3102752	1	Scientific Literature	Bioorg. Med. Chem.	2014
CHEMBL1732790		0	296.37	0	3.04	3, ZINC02488140	OCCCc1nc2ccccc2n1CCOc1ccccc1	Inhibition						Not Active						FALSE	CHEMBL3107394	Inhibition of SARS coronavirus 3C-like protease using 5-FAM-TSATLQSGFRK(QXL520)-NH2 as substrate at 100 uM preincubated for 5 mins followed by substrate addition measured after 6 mins by FRET assay in presence of GSH relative to control	B	BAO_0000019	assay format	SARS coronavirus					CHEMBL5118	Replicase polyprotein 1ab	SARS coronavirus	SINGLE PROTEIN	CHEMBL3102752	1	Scientific Literature	Bioorg. Med. Chem.	2014
CHEMBL1906723		0	325.37	0	2.33	1, ZINC01808425	COc1ccc(C(=O)Cn2c(NCCO)nc3ccccc32)cc1	Inhibition						Not Active						FALSE	CHEMBL3107395	Inhibition of SARS coronavirus 3C-like protease using 5-FAM-TSATLQSGFRK(QXL520)-NH2 as substrate at 100 uM preincubated for 5 mins followed by substrate addition measured after 6 mins by FRET assay relative to control	B	BAO_0000019	assay format	SARS coronavirus					CHEMBL5118	Replicase polyprotein 1ab	SARS coronavirus	SINGLE PROTEIN	CHEMBL3102752	1	Scientific Literature	Bioorg. Med. Chem.	2014
CHEMBL1876821		0	330.84	0	2.02	8, ZINC06559230	CN(CC(=O)NC1CCCC1)S(=O)(=O)c1cccc(Cl)c1	IC50	'='	940	nM	6.03			UO_0000065	18.22	0.39	4.01	9.07	FALSE	CHEMBL3107397	Inhibition of SARS coronavirus 3C-like protease using 5-FAM-TSATLQSGFRK(QXL520)-NH2 as substrate preincubated for 5 mins followed by substrate addition measured after 6 mins by FRET assay	B	BAO_0000019	assay format	SARS coronavirus					CHEMBL5118	Replicase polyprotein 1ab	SARS coronavirus	SINGLE PROTEIN	CHEMBL3102752	1	Scientific Literature	Bioorg. Med. Chem.	2014
CHEMBL3105072		0	334.29	0	3.23	7, ZINC01408189	Nc1ccc(F)c(S(=O)(=O)Nc2cccc(C(F)(F)F)c2)c1	Inhibition						Not Active						FALSE	CHEMBL3107395	Inhibition of SARS coronavirus 3C-like protease using 5-FAM-TSATLQSGFRK(QXL520)-NH2 as substrate at 100 uM preincubated for 5 mins followed by substrate addition measured after 6 mins by FRET assay relative to control	B	BAO_0000019	assay format	SARS coronavirus					CHEMBL5118	Replicase polyprotein 1ab	SARS coronavirus	SINGLE PROTEIN	CHEMBL3102752	1	Scientific Literature	Bioorg. Med. Chem.	2014
CHEMBL3810325		0	452.44	1	5.62	3n	O=C(O)c1ccccc1-c1ccc(/C=C2\C(=O)N(c3ccc(F)cc3)N=C2c2ccccc2)o1	IC50	'='	37500	nM	4.43			UO_0000065	9.78	0.18	-1.19	5.33	FALSE	CHEMBL3811446	Inhibition of SARS coronavirus recombinant 3CL-PRO expressed in Escherichia coli JM109 cells using Dabcyl-KTSAVLQSGFRKME-Edans as fluorogenic substrate by fluorometric assay	B	BAO_0000219	cell-based format	SARS coronavirus					CHEMBL5118	Replicase polyprotein 1ab	SARS coronavirus	SINGLE PROTEIN	CHEMBL3808339	1	Scientific Literature	Bioorg. Med. Chem.	2016
CHEMBL1732790		0	296.37	0	3.04	3, ZINC02488140	OCCCc1nc2ccccc2n1CCOc1ccccc1	IC50	'='	74500	nM	4.13			UO_0000065	13.93	0.26	1.09	8.73	FALSE	CHEMBL3107396	Inhibition of SARS coronavirus 3C-like protease using 5-FAM-TSATLQSGFRK(QXL520)-NH2 as substrate preincubated for 5 mins followed by substrate addition measured after 6 mins by FRET assay in presence of GSH	B	BAO_0000019	assay format	SARS coronavirus					CHEMBL5118	Replicase polyprotein 1ab	SARS coronavirus	SINGLE PROTEIN	CHEMBL3102752	1	Scientific Literature	Bioorg. Med. Chem.	2014
CHEMBL3105073		0	349.33	0	4.76	11, CD11546	S=C(NCc1cccnc1)SCc1cc(Cl)sc1Cl	IC50	'='	9200	nM	5.04			UO_0000065	14.42	0.36	0.28	20.21	FALSE	CHEMBL3107396	Inhibition of SARS coronavirus 3C-like protease using 5-FAM-TSATLQSGFRK(QXL520)-NH2 as substrate preincubated for 5 mins followed by substrate addition measured after 6 mins by FRET assay in presence of GSH	B	BAO_0000019	assay format	SARS coronavirus					CHEMBL5118	Replicase polyprotein 1ab	SARS coronavirus	SINGLE PROTEIN	CHEMBL3102752	1	Scientific Literature	Bioorg. Med. Chem.	2014
CHEMBL4203883		0	690.79	1	2.36	10c	CC(C)C[C@H](NC(=O)OC1(Cc2ccccc2)CCN(C(=O)OC(C)(C)C)CC1)C(=O)N[C@@H](C[C@@H]1CCNC1=O)C(O)S(=O)(=O)[O-].[Na+]	IC50	'='	6300	nM	5.2			UO_0000065	7.78	0.15	2.84	2.59	FALSE	CHEMBL4198706	Inhibition of SARS coronavirus 3CL protease using Dabcyl-KTSAVLQ/SGFRKME-Edans as substrate incubated for 30 mins followed by substrate addition measured after 1 hr by FRET assay	B	BAO_0000357	single protein format	SARS coronavirus					CHEMBL5118	Replicase polyprotein 1ab	SARS coronavirus	SINGLE PROTEIN	CHEMBL4196085	1	Scientific Literature	Eur J Med Chem	2018
CHEMBL510508	PHLOROFUCOFUROECKOL A	0	602.46	4	6.42	9	Oc1cc(O)cc(Oc2c(O)cc(O)c3c2Oc2c(O)cc4oc5c(Oc6cc(O)cc(O)c6)c(O)cc(O)c5c4c2O3)c1	Inhibition						Dose-dependent effect						FALSE	CHEMBL2395056	Inhibition of C-terminal His6-tagged recombinant SARS coronavirus 3C-like protease trans-cleavage activity expressed in Escherichia coli BL21 (DE3) using Dabcyl-KTSAVLQSGFRKME as substrate after 60 mins by FRET assay	B	BAO_0000019	assay format	SARS coronavirus					CHEMBL5118	Replicase polyprotein 1ab	SARS coronavirus	SINGLE PROTEIN	CHEMBL2390950	1	Scientific Literature	Bioorg. Med. Chem.	2013
CHEMBL399121	HESPERETIN	0	302.28	0	2.52	Hesperetin	COc1ccc([C@@H]2CC(=O)c3c(O)cc(O)cc3O2)cc1O	IC50	'='	60000	nM	4.22			UO_0000065	13.97	0.26	1.7	4.39	FALSE	CHEMBL2395054	Inhibition of recombinant SARS coronavirus 3C-like protease trans-cleavage activity by ELISA	B	BAO_0000019	assay format	SARS coronavirus					CHEMBL5118	Replicase polyprotein 1ab	SARS coronavirus	SINGLE PROTEIN	CHEMBL2390950	1	Scientific Literature	Bioorg. Med. Chem.	2013
CHEMBL3818028		0	605.56	3	-6.5	page 4129, R47C1,cpd1	CC(=O)N[C@@H](CC(N)=O)C(=O)N[C@@H](CO)C(=O)N[C@H](C(=O)N[C@@H](CC(=O)O)C(=O)N[C@@H](CCC(N)=O)C(=O)O)[C@@H](C)O	IC50	'='	20000	nM	4.7			UO_0000065	7.76	0.15	11.2	1.36	FALSE	CHEMBL3819981	Inhibition of SARS coronavirus main proteinase 3C-like protease	B	BAO_0000019	assay format	SARS coronavirus					CHEMBL5118	Replicase polyprotein 1ab	SARS coronavirus	SINGLE PROTEIN	CHEMBL3817815	1	Scientific Literature	J. Med. Chem.	2016
CHEMBL3810058		0	390.44	1	5.78	3j	O=C1/C(=C\c2ccc(-c3ccccc3)o2)C(c2ccccc2)=NN1c1ccccc1	IC50	'>'	50000	nM				UO_0000065					FALSE	CHEMBL3811446	Inhibition of SARS coronavirus recombinant 3CL-PRO expressed in Escherichia coli JM109 cells using Dabcyl-KTSAVLQSGFRKME-Edans as fluorogenic substrate by fluorometric assay	B	BAO_0000219	cell-based format	SARS coronavirus					CHEMBL5118	Replicase polyprotein 1ab	SARS coronavirus	SINGLE PROTEIN	CHEMBL3808339	1	Scientific Literature	Bioorg. Med. Chem.	2016
CHEMBL508791	DIECKOL	0	742.55	4	7.62	8	Oc1cc(O)cc(Oc2c(O)cc(O)c3c2Oc2c(O)cc(Oc4c(O)cc(Oc5c(O)cc(O)c6c5Oc5c(O)cc(O)cc5O6)cc4O)cc2O3)c1	Inhibition						Active						FALSE	CHEMBL2394459	Competitive inhibition of C-terminal His6-tagged recombinant SARS coronavirus 3C-like protease trans-cleavage activity expressed in Escherichia coli BL21 (DE3) using Dabcyl-KTSAVLQSGFRKME as substrate after 60 mins by Lineweaver-Burk plot analysis	B	BAO_0000019	assay format	SARS coronavirus					CHEMBL5118	Replicase polyprotein 1ab	SARS coronavirus	SINGLE PROTEIN	CHEMBL2390950	1	Scientific Literature	Bioorg. Med. Chem.	2013
CHEMBL40275	ALOE-EMODIN	0	270.24	0	1.37	Aloeemodin	O=C1c2cccc(O)c2C(=O)c2c(O)cc(CO)cc21	IC50	'='	132000	nM		Outside typical range		UO_0000065					FALSE	CHEMBL2395054	Inhibition of recombinant SARS coronavirus 3C-like protease trans-cleavage activity by ELISA	B	BAO_0000019	assay format	SARS coronavirus					CHEMBL5118	Replicase polyprotein 1ab	SARS coronavirus	SINGLE PROTEIN	CHEMBL2390950	1	Scientific Literature	Bioorg. Med. Chem.	2013
CHEMBL8145	DAIDZEIN	2	254.24	0	2.87	Daidzein	O=c1c(-c2ccc(O)cc2)coc2cc(O)ccc12	IC50	'='	105000	nM		Outside typical range		UO_0000065					FALSE	CHEMBL2395054	Inhibition of recombinant SARS coronavirus 3C-like protease trans-cleavage activity by ELISA	B	BAO_0000019	assay format	SARS coronavirus					CHEMBL5118	Replicase polyprotein 1ab	SARS coronavirus	SINGLE PROTEIN	CHEMBL2390950	1	Scientific Literature	Bioorg. Med. Chem.	2013
CHEMBL399121	HESPERETIN	0	302.28	0	2.52	Hesperetin	COc1ccc([C@@H]2CC(=O)c3c(O)cc(O)cc3O2)cc1O	IC50	'='	8300	nM	5.08			UO_0000065	16.81	0.32	2.56	5.28	FALSE	CHEMBL2394461	Inhibition of SARS coronavirus 3C-like protease cis-cleavage activity transfected in african green monkey Vero cells by luciferase reporter gene assay	B	BAO_0000219	cell-based format	SARS coronavirus			Vero		CHEMBL5118	Replicase polyprotein 1ab	SARS coronavirus	SINGLE PROTEIN	CHEMBL2390950	1	Scientific Literature	Bioorg. Med. Chem.	2013	CHEMBL3307520
CHEMBL459393	FUCODIPHLOROETHOL G	0	498.4	2	3.99	7	Oc1cc(O)c(Oc2cc(O)cc(O)c2Oc2cc(O)cc(O)c2-c2c(O)cc(O)cc2O)c(O)c1	Inhibition						Dose-dependent effect						FALSE	CHEMBL2395056	Inhibition of C-terminal His6-tagged recombinant SARS coronavirus 3C-like protease trans-cleavage activity expressed in Escherichia coli BL21 (DE3) using Dabcyl-KTSAVLQSGFRKME as substrate after 60 mins by FRET assay	B	BAO_0000019	assay format	SARS coronavirus					CHEMBL5118	Replicase polyprotein 1ab	SARS coronavirus	SINGLE PROTEIN	CHEMBL2390950	1	Scientific Literature	Bioorg. Med. Chem.	2013
CHEMBL4217568		0	468.55	0	0.96	9f	CCOC(=O)N1CCC(OC(=O)N[C@@H](CC(C)C)C(=O)N[C@H](C=O)C[C@@H]2CCNC2=O)CC1	IC50	'='	3200	nM	5.5			UO_0000065	11.73	0.23	4.53	3.84	FALSE	CHEMBL4198706	Inhibition of SARS coronavirus 3CL protease using Dabcyl-KTSAVLQ/SGFRKME-Edans as substrate incubated for 30 mins followed by substrate addition measured after 1 hr by FRET assay	B	BAO_0000357	single protein format	SARS coronavirus					CHEMBL5118	Replicase polyprotein 1ab	SARS coronavirus	SINGLE PROTEIN	CHEMBL4196085	1	Scientific Literature	Eur J Med Chem	2018
CHEMBL3810010		0	406.83	1	5.1	3e	CC1=NN(c2ccccc2)C(=O)/C1=C\c1ccc(-c2cc(Cl)ccc2C(=O)O)o1	IC50	'>'	50000	nM				UO_0000065					FALSE	CHEMBL3811446	Inhibition of SARS coronavirus recombinant 3CL-PRO expressed in Escherichia coli JM109 cells using Dabcyl-KTSAVLQSGFRKME-Edans as fluorogenic substrate by fluorometric assay	B	BAO_0000219	cell-based format	SARS coronavirus					CHEMBL5118	Replicase polyprotein 1ab	SARS coronavirus	SINGLE PROTEIN	CHEMBL3808339	1	Scientific Literature	Bioorg. Med. Chem.	2016
CHEMBL3808427		0	525	2	7.43	3i	CC(C)(C)c1ccc(N2N=C(c3ccccc3)/C(=C/c3ccc(-c4cc(Cl)ccc4C(=O)O)o3)C2=O)cc1	IC50	'='	5800	nM	5.24			UO_0000065	9.97	0.19	-2.19	6.3	FALSE	CHEMBL3811446	Inhibition of SARS coronavirus recombinant 3CL-PRO expressed in Escherichia coli JM109 cells using Dabcyl-KTSAVLQSGFRKME-Edans as fluorogenic substrate by fluorometric assay	B	BAO_0000219	cell-based format	SARS coronavirus					CHEMBL5118	Replicase polyprotein 1ab	SARS coronavirus	SINGLE PROTEIN	CHEMBL3808339	1	Scientific Literature	Bioorg. Med. Chem.	2016
CHEMBL3809579		0	490.56	1	6.78	3p	CC(C)(C)c1ccc(N2N=C(c3ccccc3)/C(=C/c3ccc(-c4ccccc4C(=O)O)o3)C2=O)cc1	IC50	'='	8600	nM	5.07			UO_0000065	10.33	0.19	-1.71	6.09	FALSE	CHEMBL3811446	Inhibition of SARS coronavirus recombinant 3CL-PRO expressed in Escherichia coli JM109 cells using Dabcyl-KTSAVLQSGFRKME-Edans as fluorogenic substrate by fluorometric assay	B	BAO_0000219	cell-based format	SARS coronavirus					CHEMBL5118	Replicase polyprotein 1ab	SARS coronavirus	SINGLE PROTEIN	CHEMBL3808339	1	Scientific Literature	Bioorg. Med. Chem.	2016
CHEMBL3809833		0	358.35	0	3.81	3s	O=C(O)c1cccc(N2N=C(c3ccccc3)/C(=C/c3ccco3)C2=O)c1	IC50	'>'	50000	nM				UO_0000065					FALSE	CHEMBL3811446	Inhibition of SARS coronavirus recombinant 3CL-PRO expressed in Escherichia coli JM109 cells using Dabcyl-KTSAVLQSGFRKME-Edans as fluorogenic substrate by fluorometric assay	B	BAO_0000219	cell-based format	SARS coronavirus					CHEMBL5118	Replicase polyprotein 1ab	SARS coronavirus	SINGLE PROTEIN	CHEMBL3808339	1	Scientific Literature	Bioorg. Med. Chem.	2016
CHEMBL3809926		0	474.52	1	5.8	3u	O=C(O)c1cccc(N2N=C(c3ccccc3)/C(=C/c3ccc(OCc4ccccc4)cc3)C2=O)c1	IC50	'='	15700	nM	4.8			UO_0000065	10.12	0.18	-1	6.07	FALSE	CHEMBL3811446	Inhibition of SARS coronavirus recombinant 3CL-PRO expressed in Escherichia coli JM109 cells using Dabcyl-KTSAVLQSGFRKME-Edans as fluorogenic substrate by fluorometric assay	B	BAO_0000219	cell-based format	SARS coronavirus					CHEMBL5118	Replicase polyprotein 1ab	SARS coronavirus	SINGLE PROTEIN	CHEMBL3808339	1	Scientific Literature	Bioorg. Med. Chem.	2016
CHEMBL4212620		0	524.66	1	2.52	9e	CCC1(OC(=O)N[C@@H](CC(C)C)C(=O)N[C@H](C=O)C[C@@H]2CCNC2=O)CCN(C(=O)OC(C)(C)C)CC1	IC50	'='	5500	nM	5.26			UO_0000065	10.02	0.19	2.74	3.67	FALSE	CHEMBL4198706	Inhibition of SARS coronavirus 3CL protease using Dabcyl-KTSAVLQ/SGFRKME-Edans as substrate incubated for 30 mins followed by substrate addition measured after 1 hr by FRET assay	B	BAO_0000357	single protein format	SARS coronavirus					CHEMBL5118	Replicase polyprotein 1ab	SARS coronavirus	SINGLE PROTEIN	CHEMBL4196085	1	Scientific Literature	Eur J Med Chem	2018
CHEMBL4209146		0	474.58	0	-0.24	9b	CC(C)C[C@H](NC(=O)OC1CCN(S(C)(=O)=O)CC1)C(=O)N[C@H](C=O)C[C@@H]1CCNC1=O	IC50	'='	28800	nM	4.54			UO_0000065	9.57	0.19	4.78	3.01	FALSE	CHEMBL4198706	Inhibition of SARS coronavirus 3CL protease using Dabcyl-KTSAVLQ/SGFRKME-Edans as substrate incubated for 30 mins followed by substrate addition measured after 1 hr by FRET assay	B	BAO_0000357	single protein format	SARS coronavirus					CHEMBL5118	Replicase polyprotein 1ab	SARS coronavirus	SINGLE PROTEIN	CHEMBL4196085	1	Scientific Literature	Eur J Med Chem	2018
CHEMBL3818761		0	626.67	2	-3.83	page 4129, R52C1	CC(=O)N[C@@H](Cc1cnc[nH]1)C(=O)N[C@@H](CO)C(=O)N[C@H](C(=O)N[C@@H](CC(C)C)C(=O)N[C@@H](CCC(N)=O)C(=O)O)[C@@H](C)O	IC50	'>'	50000	nM				UO_0000065					FALSE	CHEMBL3819981	Inhibition of SARS coronavirus main proteinase 3C-like protease	B	BAO_0000019	assay format	SARS coronavirus					CHEMBL5118	Replicase polyprotein 1ab	SARS coronavirus	SINGLE PROTEIN	CHEMBL3817815	1	Scientific Literature	J. Med. Chem.	2016
CHEMBL3818593		0	618.64	2	-3.94	page 4129, R48C1,cpd1	CC(=O)N[C@@H](CCC(=O)O)C(=O)N[C@@H](CO)C(=O)N[C@H](C(=O)N[C@@H](CC(C)C)C(=O)N[C@@H](CCC(N)=O)C(=O)O)[C@@H](C)O	Ki	'='	8000	nM	5.1			UO_0000065	8.24	0.16	9.04	1.68	FALSE	CHEMBL3819982	Binding affinity to SARS coronavirus main proteinase 3C-like protease	B	BAO_0000019	assay format	SARS coronavirus					CHEMBL5118	Replicase polyprotein 1ab	SARS coronavirus	SINGLE PROTEIN	CHEMBL3817815	1	Scientific Literature	J. Med. Chem.	2016
CHEMBL3819122		0	623.62	2	-5.12	page 4129, R58C1,cpd2	CC(=O)N[C@@H](CC(N)=O)C(=O)N[C@@H](CO)C(=O)N[C@@H](Cc1ccccc1)C(=O)N[C@@H](CO)C(=O)N[C@@H](CCC(N)=O)C(=O)O	Ki	'='	72000	nM	4.14			UO_0000065	6.64	0.13	9.26	1.34	FALSE	CHEMBL3819982	Binding affinity to SARS coronavirus main proteinase 3C-like protease	B	BAO_0000019	assay format	SARS coronavirus					CHEMBL5118	Replicase polyprotein 1ab	SARS coronavirus	SINGLE PROTEIN	CHEMBL3817815	1	Scientific Literature	J. Med. Chem.	2016
CHEMBL471187	ECKOL	0	372.29	1	3.61	3	Oc1cc(O)cc(Oc2c(O)cc(O)c3c2Oc2c(O)cc(O)cc2O3)c1	Inhibition	'='	30	%				UO_0000187					FALSE	CHEMBL2395049	Inhibition of SARS coronavirus 3C-like protease cis-cleavage activity transfected in african green monkey Vero cells using SAVLQSGFRK as substrate at 200 uM after 5 hrs by luciferase reporter gene assay relative to control	B	BAO_0000219	cell-based format	SARS coronavirus			Vero		CHEMBL5118	Replicase polyprotein 1ab	SARS coronavirus	SINGLE PROTEIN	CHEMBL2390950	1	Scientific Literature	Bioorg. Med. Chem.	2013	CHEMBL3307520
CHEMBL2391423	2-PHLOROECKOL	0	496.38	2	4.81	5	Oc1cc(O)cc(Oc2c(Oc3c(O)cc(O)cc3O)cc(O)c3c2Oc2c(O)cc(O)cc2O3)c1	Ki	'='	24000	nM	4.62			UO_0000065	9.31	0.18	-0.19	2.32	FALSE	CHEMBL2395055	Competitive inhibition of C-terminal His6-tagged recombinant SARS coronavirus 3C-like protease trans-cleavage activity expressed in Escherichia coli BL21 (DE3) using Dabcyl-KTSAVLQSGFRKME as substrate after 60 mins by Dixon plot analysis	B	BAO_0000019	assay format	SARS coronavirus					CHEMBL5118	Replicase polyprotein 1ab	SARS coronavirus	SINGLE PROTEIN	CHEMBL2390950	1	Scientific Literature	Bioorg. Med. Chem.	2013
CHEMBL456228		0	496.38	2	4.81	6	Oc1cc(O)cc(Oc2c(O)cc(O)c3c2Oc2c(O)cc(Oc4c(O)cc(O)cc4O)cc2O3)c1	Inhibition						Dose-dependent effect						FALSE	CHEMBL2394462	Inhibition of SARS coronavirus 3C-like protease cis-cleavage activity transfected in african green monkey Vero cells using SAVLQSGFRK as substrate after 5 hrs by luciferase reporter gene assay	B	BAO_0000219	cell-based format	SARS coronavirus			Vero		CHEMBL5118	Replicase polyprotein 1ab	SARS coronavirus	SINGLE PROTEIN	CHEMBL2390950	1	Scientific Literature	Bioorg. Med. Chem.	2013	CHEMBL3307520
CHEMBL4202812		0	586.73	1	3.35	9c	CC(C)C[C@H](NC(=O)OC1(Cc2ccccc2)CCN(C(=O)OC(C)(C)C)CC1)C(=O)N[C@H](C=O)C[C@@H]1CCNC1=O	IC50	'='	5200	nM	5.28			UO_0000065	9.01	0.17	1.93	3.69	FALSE	CHEMBL4198706	Inhibition of SARS coronavirus 3CL protease using Dabcyl-KTSAVLQ/SGFRKME-Edans as substrate incubated for 30 mins followed by substrate addition measured after 1 hr by FRET assay	B	BAO_0000357	single protein format	SARS coronavirus					CHEMBL5118	Replicase polyprotein 1ab	SARS coronavirus	SINGLE PROTEIN	CHEMBL4196085	1	Scientific Literature	Eur J Med Chem	2018
CHEMBL4208240		0	600.67	1	0.74	10a	CC(C)C[C@H](NC(=O)OC1CCN(C(=O)OC(C)(C)C)CC1)C(=O)N[C@@H](C[C@@H]1CCNC1=O)C(O)S(=O)(=O)[O-].[Na+]	IC50	'='	5100	nM	5.29			UO_0000065	9.15	0.19	4.55	2.64	FALSE	CHEMBL4198706	Inhibition of SARS coronavirus 3CL protease using Dabcyl-KTSAVLQ/SGFRKME-Edans as substrate incubated for 30 mins followed by substrate addition measured after 1 hr by FRET assay	B	BAO_0000357	single protein format	SARS coronavirus					CHEMBL5118	Replicase polyprotein 1ab	SARS coronavirus	SINGLE PROTEIN	CHEMBL4196085	1	Scientific Literature	Eur J Med Chem	2018
CHEMBL4208764		0	668.77	1	0.38	10d	CC(C)C[C@H](NC(=O)OC1(Cc2ccccc2)CCN(S(C)(=O)=O)CC1)C(=O)N[C@@H](C[C@@H]1CCNC1=O)C(O)S(=O)(=O)[O-].[Na+]	IC50	'='	4300	nM	5.37			UO_0000065	8.3	0.17	4.99	2.57	FALSE	CHEMBL4198706	Inhibition of SARS coronavirus 3CL protease using Dabcyl-KTSAVLQ/SGFRKME-Edans as substrate incubated for 30 mins followed by substrate addition measured after 1 hr by FRET assay	B	BAO_0000357	single protein format	SARS coronavirus					CHEMBL5118	Replicase polyprotein 1ab	SARS coronavirus	SINGLE PROTEIN	CHEMBL4196085	1	Scientific Literature	Eur J Med Chem	2018
CHEMBL3818593		0	618.64	2	-3.94	page 4129, R48C1,cpd1	CC(=O)N[C@@H](CCC(=O)O)C(=O)N[C@@H](CO)C(=O)N[C@H](C(=O)N[C@@H](CC(C)C)C(=O)N[C@@H](CCC(N)=O)C(=O)O)[C@@H](C)O	IC50	'='	7500	nM	5.12			UO_0000065	8.28	0.16	9.06	1.69	FALSE	CHEMBL3819981	Inhibition of SARS coronavirus main proteinase 3C-like protease	B	BAO_0000019	assay format	SARS coronavirus					CHEMBL5118	Replicase polyprotein 1ab	SARS coronavirus	SINGLE PROTEIN	CHEMBL3817815	1	Scientific Literature	J. Med. Chem.	2016
CHEMBL4214471		0	564.71	1	1.37	9d	CC(C)C[C@H](NC(=O)OC1(Cc2ccccc2)CCN(S(C)(=O)=O)CC1)C(=O)N[C@H](C=O)C[C@@H]1CCNC1=O	IC50	'='	3900	nM	5.41			UO_0000065	9.58	0.19	4.04	3.58	FALSE	CHEMBL4198706	Inhibition of SARS coronavirus 3CL protease using Dabcyl-KTSAVLQ/SGFRKME-Edans as substrate incubated for 30 mins followed by substrate addition measured after 1 hr by FRET assay	B	BAO_0000357	single protein format	SARS coronavirus					CHEMBL5118	Replicase polyprotein 1ab	SARS coronavirus	SINGLE PROTEIN	CHEMBL4196085	1	Scientific Literature	Eur J Med Chem	2018
CHEMBL4213159		0	578.64	1	-1.23	10b	CC(C)C[C@H](NC(=O)OC1CCN(S(C)(=O)=O)CC1)C(=O)N[C@@H](C[C@@H]1CCNC1=O)C(O)S(=O)(=O)[O-].[Na+]	IC50	'='	42100	nM	4.38			UO_0000065	7.86	0.17	5.61	2.1	FALSE	CHEMBL4198706	Inhibition of SARS coronavirus 3CL protease using Dabcyl-KTSAVLQ/SGFRKME-Edans as substrate incubated for 30 mins followed by substrate addition measured after 1 hr by FRET assay	B	BAO_0000357	single protein format	SARS coronavirus					CHEMBL5118	Replicase polyprotein 1ab	SARS coronavirus	SINGLE PROTEIN	CHEMBL4196085	1	Scientific Literature	Eur J Med Chem	2018
CHEMBL4204431		0	572.61	1	-0.03	10f	CCOC(=O)N1CCC(OC(=O)N[C@@H](CC(C)C)C(=O)N[C@@H](C[C@@H]2CCNC2=O)C(O)S(=O)(=O)[O-])CC1.[Na+]	IC50	'='	8800	nM	5.06			UO_0000065	9.18	0.19	5.09	2.52	FALSE	CHEMBL4198706	Inhibition of SARS coronavirus 3CL protease using Dabcyl-KTSAVLQ/SGFRKME-Edans as substrate incubated for 30 mins followed by substrate addition measured after 1 hr by FRET assay	B	BAO_0000357	single protein format	SARS coronavirus					CHEMBL5118	Replicase polyprotein 1ab	SARS coronavirus	SINGLE PROTEIN	CHEMBL4196085	1	Scientific Literature	Eur J Med Chem	2018
CHEMBL4208240		0	600.67	1	0.74	10a	CC(C)C[C@H](NC(=O)OC1CCN(C(=O)OC(C)(C)C)CC1)C(=O)N[C@@H](C[C@@H]1CCNC1=O)C(O)S(=O)(=O)[O-].[Na+]	IC50	'='	400	nM	6.4			UO_0000065	11.06	0.22	5.66	3.19	FALSE	CHEMBL4198705	Inhibition of Middle East respiratory syndrome-related coronavirus 3CL protease using Dabcyl-KTSAVLQ/SGFRKME-Edans as substrate incubated for 30 mins followed by substrate addition measured after 1 hr by FRET assay	B	BAO_0000357	single protein format	Middle East respiratory syndrome-related coronavirus					CHEMBL4295557	Replicase polyprotein 1ab	Middle East respiratory syndrome-related coronavirus (isolate UnitedKingdom/H123990006/2012) (Betacoronavirus England 1) (Humancoronavirus EMC)	SINGLE PROTEIN	CHEMBL4196085	1	Scientific Literature	Eur J Med Chem	2018
CHEMBL4203883		0	690.79	1	2.36	10c	CC(C)C[C@H](NC(=O)OC1(Cc2ccccc2)CCN(C(=O)OC(C)(C)C)CC1)C(=O)N[C@@H](C[C@@H]1CCNC1=O)C(O)S(=O)(=O)[O-].[Na+]	IC50	'='	700	nM	6.16			UO_0000065	9.2	0.18	3.79	3.07	FALSE	CHEMBL4198705	Inhibition of Middle East respiratory syndrome-related coronavirus 3CL protease using Dabcyl-KTSAVLQ/SGFRKME-Edans as substrate incubated for 30 mins followed by substrate addition measured after 1 hr by FRET assay	B	BAO_0000357	single protein format	Middle East respiratory syndrome-related coronavirus					CHEMBL4295557	Replicase polyprotein 1ab	Middle East respiratory syndrome-related coronavirus (isolate UnitedKingdom/H123990006/2012) (Betacoronavirus England 1) (Humancoronavirus EMC)	SINGLE PROTEIN	CHEMBL4196085	1	Scientific Literature	Eur J Med Chem	2018
CHEMBL4204431		0	572.61	1	-0.03	10f	CCOC(=O)N1CCC(OC(=O)N[C@@H](CC(C)C)C(=O)N[C@@H](C[C@@H]2CCNC2=O)C(O)S(=O)(=O)[O-])CC1.[Na+]	IC50	'='	500	nM	6.3			UO_0000065	11.44	0.23	6.33	3.14	FALSE	CHEMBL4198705	Inhibition of Middle East respiratory syndrome-related coronavirus 3CL protease using Dabcyl-KTSAVLQ/SGFRKME-Edans as substrate incubated for 30 mins followed by substrate addition measured after 1 hr by FRET assay	B	BAO_0000357	single protein format	Middle East respiratory syndrome-related coronavirus					CHEMBL4295557	Replicase polyprotein 1ab	Middle East respiratory syndrome-related coronavirus (isolate UnitedKingdom/H123990006/2012) (Betacoronavirus England 1) (Humancoronavirus EMC)	SINGLE PROTEIN	CHEMBL4196085	1	Scientific Literature	Eur J Med Chem	2018
CHEMBL4212620		0	524.66	1	2.52	9e	CCC1(OC(=O)N[C@@H](CC(C)C)C(=O)N[C@H](C=O)C[C@@H]2CCNC2=O)CCN(C(=O)OC(C)(C)C)CC1	IC50	'='	6100	nM	5.21			UO_0000065	9.94	0.19	2.69	3.64	FALSE	CHEMBL4198705	Inhibition of Middle East respiratory syndrome-related coronavirus 3CL protease using Dabcyl-KTSAVLQ/SGFRKME-Edans as substrate incubated for 30 mins followed by substrate addition measured after 1 hr by FRET assay	B	BAO_0000357	single protein format	Middle East respiratory syndrome-related coronavirus					CHEMBL4295557	Replicase polyprotein 1ab	Middle East respiratory syndrome-related coronavirus (isolate UnitedKingdom/H123990006/2012) (Betacoronavirus England 1) (Humancoronavirus EMC)	SINGLE PROTEIN	CHEMBL4196085	1	Scientific Literature	Eur J Med Chem	2018
CHEMBL4209146		0	474.58	0	-0.24	9b	CC(C)C[C@H](NC(=O)OC1CCN(S(C)(=O)=O)CC1)C(=O)N[C@H](C=O)C[C@@H]1CCNC1=O	IC50	'='	700	nM	6.16			UO_0000065	12.97	0.26	6.39	4.08	FALSE	CHEMBL4198705	Inhibition of Middle East respiratory syndrome-related coronavirus 3CL protease using Dabcyl-KTSAVLQ/SGFRKME-Edans as substrate incubated for 30 mins followed by substrate addition measured after 1 hr by FRET assay	B	BAO_0000357	single protein format	Middle East respiratory syndrome-related coronavirus					CHEMBL4295557	Replicase polyprotein 1ab	Middle East respiratory syndrome-related coronavirus (isolate UnitedKingdom/H123990006/2012) (Betacoronavirus England 1) (Humancoronavirus EMC)	SINGLE PROTEIN	CHEMBL4196085	1	Scientific Literature	Eur J Med Chem	2018
CHEMBL4213159		0	578.64	1	-1.23	10b	CC(C)C[C@H](NC(=O)OC1CCN(S(C)(=O)=O)CC1)C(=O)N[C@@H](C[C@@H]1CCNC1=O)C(O)S(=O)(=O)[O-].[Na+]	IC50	'='	600	nM	6.22			UO_0000065	11.18	0.24	7.45	2.98	FALSE	CHEMBL4198705	Inhibition of Middle East respiratory syndrome-related coronavirus 3CL protease using Dabcyl-KTSAVLQ/SGFRKME-Edans as substrate incubated for 30 mins followed by substrate addition measured after 1 hr by FRET assay	B	BAO_0000357	single protein format	Middle East respiratory syndrome-related coronavirus					CHEMBL4295557	Replicase polyprotein 1ab	Middle East respiratory syndrome-related coronavirus (isolate UnitedKingdom/H123990006/2012) (Betacoronavirus England 1) (Humancoronavirus EMC)	SINGLE PROTEIN	CHEMBL4196085	1	Scientific Literature	Eur J Med Chem	2018
CHEMBL4202812		0	586.73	1	3.35	9c	CC(C)C[C@H](NC(=O)OC1(Cc2ccccc2)CCN(C(=O)OC(C)(C)C)CC1)C(=O)N[C@H](C=O)C[C@@H]1CCNC1=O	IC50	'='	800	nM	6.1			UO_0000065	10.39	0.2	2.75	4.26	FALSE	CHEMBL4198705	Inhibition of Middle East respiratory syndrome-related coronavirus 3CL protease using Dabcyl-KTSAVLQ/SGFRKME-Edans as substrate incubated for 30 mins followed by substrate addition measured after 1 hr by FRET assay	B	BAO_0000357	single protein format	Middle East respiratory syndrome-related coronavirus					CHEMBL4295557	Replicase polyprotein 1ab	Middle East respiratory syndrome-related coronavirus (isolate UnitedKingdom/H123990006/2012) (Betacoronavirus England 1) (Humancoronavirus EMC)	SINGLE PROTEIN	CHEMBL4196085	1	Scientific Literature	Eur J Med Chem	2018
CHEMBL4217568		0	468.55	0	0.96	9f	CCOC(=O)N1CCC(OC(=O)N[C@@H](CC(C)C)C(=O)N[C@H](C=O)C[C@@H]2CCNC2=O)CC1	IC50	'='	600	nM	6.22			UO_0000065	13.28	0.26	5.26	4.35	FALSE	CHEMBL4198705	Inhibition of Middle East respiratory syndrome-related coronavirus 3CL protease using Dabcyl-KTSAVLQ/SGFRKME-Edans as substrate incubated for 30 mins followed by substrate addition measured after 1 hr by FRET assay	B	BAO_0000357	single protein format	Middle East respiratory syndrome-related coronavirus					CHEMBL4295557	Replicase polyprotein 1ab	Middle East respiratory syndrome-related coronavirus (isolate UnitedKingdom/H123990006/2012) (Betacoronavirus England 1) (Humancoronavirus EMC)	SINGLE PROTEIN	CHEMBL4196085	1	Scientific Literature	Eur J Med Chem	2018
CHEMBL4214066		0	496.61	0	1.74	9a	CC(C)C[C@H](NC(=O)OC1CCN(C(=O)OC(C)(C)C)CC1)C(=O)N[C@H](C=O)C[C@@H]1CCNC1=O	IC50	'='	600	nM	6.22			UO_0000065	12.53	0.24	4.48	4.35	FALSE	CHEMBL4198705	Inhibition of Middle East respiratory syndrome-related coronavirus 3CL protease using Dabcyl-KTSAVLQ/SGFRKME-Edans as substrate incubated for 30 mins followed by substrate addition measured after 1 hr by FRET assay	B	BAO_0000357	single protein format	Middle East respiratory syndrome-related coronavirus					CHEMBL4295557	Replicase polyprotein 1ab	Middle East respiratory syndrome-related coronavirus (isolate UnitedKingdom/H123990006/2012) (Betacoronavirus England 1) (Humancoronavirus EMC)	SINGLE PROTEIN	CHEMBL4196085	1	Scientific Literature	Eur J Med Chem	2018
CHEMBL4216101		0	628.72	1	1.52	10e	CCC1(OC(=O)N[C@@H](CC(C)C)C(=O)N[C@@H](C[C@@H]2CCNC2=O)C(O)S(=O)(=O)[O-])CCN(C(=O)OC(C)(C)C)CC1.[Na+]	IC50	'='	7500	nM	5.12			UO_0000065	8.45	0.17	3.6	2.55	FALSE	CHEMBL4198705	Inhibition of Middle East respiratory syndrome-related coronavirus 3CL protease using Dabcyl-KTSAVLQ/SGFRKME-Edans as substrate incubated for 30 mins followed by substrate addition measured after 1 hr by FRET assay	B	BAO_0000357	single protein format	Middle East respiratory syndrome-related coronavirus					CHEMBL4295557	Replicase polyprotein 1ab	Middle East respiratory syndrome-related coronavirus (isolate UnitedKingdom/H123990006/2012) (Betacoronavirus England 1) (Humancoronavirus EMC)	SINGLE PROTEIN	CHEMBL4196085	1	Scientific Literature	Eur J Med Chem	2018
CHEMBL4208764		0	668.77	1	0.38	10d	CC(C)C[C@H](NC(=O)OC1(Cc2ccccc2)CCN(S(C)(=O)=O)CC1)C(=O)N[C@@H](C[C@@H]1CCNC1=O)C(O)S(=O)(=O)[O-].[Na+]	IC50	'='	900	nM	6.05			UO_0000065	9.35	0.19	5.67	2.9	FALSE	CHEMBL4198705	Inhibition of Middle East respiratory syndrome-related coronavirus 3CL protease using Dabcyl-KTSAVLQ/SGFRKME-Edans as substrate incubated for 30 mins followed by substrate addition measured after 1 hr by FRET assay	B	BAO_0000357	single protein format	Middle East respiratory syndrome-related coronavirus					CHEMBL4295557	Replicase polyprotein 1ab	Middle East respiratory syndrome-related coronavirus (isolate UnitedKingdom/H123990006/2012) (Betacoronavirus England 1) (Humancoronavirus EMC)	SINGLE PROTEIN	CHEMBL4196085	1	Scientific Literature	Eur J Med Chem	2018
CHEMBL4214471		0	564.71	1	1.37	9d	CC(C)C[C@H](NC(=O)OC1(Cc2ccccc2)CCN(S(C)(=O)=O)CC1)C(=O)N[C@H](C=O)C[C@@H]1CCNC1=O	IC50	'='	700	nM	6.16			UO_0000065	10.9	0.22	4.78	4.08	FALSE	CHEMBL4198705	Inhibition of Middle East respiratory syndrome-related coronavirus 3CL protease using Dabcyl-KTSAVLQ/SGFRKME-Edans as substrate incubated for 30 mins followed by substrate addition measured after 1 hr by FRET assay	B	BAO_0000357	single protein format	Middle East respiratory syndrome-related coronavirus					CHEMBL4295557	Replicase polyprotein 1ab	Middle East respiratory syndrome-related coronavirus (isolate UnitedKingdom/H123990006/2012) (Betacoronavirus England 1) (Humancoronavirus EMC)	SINGLE PROTEIN	CHEMBL4196085	1	Scientific Literature	Eur J Med Chem	2018
CHEMBL4208240		0	600.67	1	0.74	10a	CC(C)C[C@H](NC(=O)OC1CCN(C(=O)OC(C)(C)C)CC1)C(=O)N[C@@H](C[C@@H]1CCNC1=O)C(O)S(=O)(=O)[O-].[Na+]	IC50	'='	2400	nM	5.62			UO_0000065	9.71	0.2	4.88	2.8	FALSE	CHEMBL4198707	Inhibition of Feline infectious peritonitis virus 3CL protease using Dabcyl-KTSAVLQ/SGFRKME-Edans as substrate incubated for 30 mins followed by substrate addition measured after 1 hr by FRET assay	B	BAO_0000357	single protein format	Feline infectious peritonitis virus					CHEMBL4295624	Replicase polyprotein 1ab	Feline coronavirus (strain FIPV WSU-79/1146) (FCoV)	SINGLE PROTEIN	CHEMBL4196085	1	Scientific Literature	Eur J Med Chem	2018
CHEMBL4214471		0	564.71	1	1.37	9d	CC(C)C[C@H](NC(=O)OC1(Cc2ccccc2)CCN(S(C)(=O)=O)CC1)C(=O)N[C@H](C=O)C[C@@H]1CCNC1=O	IC50	'='	800	nM	6.1			UO_0000065	10.8	0.21	4.73	4.04	FALSE	CHEMBL4198707	Inhibition of Feline infectious peritonitis virus 3CL protease using Dabcyl-KTSAVLQ/SGFRKME-Edans as substrate incubated for 30 mins followed by substrate addition measured after 1 hr by FRET assay	B	BAO_0000357	single protein format	Feline infectious peritonitis virus					CHEMBL4295624	Replicase polyprotein 1ab	Feline coronavirus (strain FIPV WSU-79/1146) (FCoV)	SINGLE PROTEIN	CHEMBL4196085	1	Scientific Literature	Eur J Med Chem	2018
CHEMBL4213159		0	578.64	1	-1.23	10b	CC(C)C[C@H](NC(=O)OC1CCN(S(C)(=O)=O)CC1)C(=O)N[C@@H](C[C@@H]1CCNC1=O)C(O)S(=O)(=O)[O-].[Na+]	IC50	'='	2300	nM	5.64			UO_0000065	10.13	0.21	6.87	2.7	FALSE	CHEMBL4198707	Inhibition of Feline infectious peritonitis virus 3CL protease using Dabcyl-KTSAVLQ/SGFRKME-Edans as substrate incubated for 30 mins followed by substrate addition measured after 1 hr by FRET assay	B	BAO_0000357	single protein format	Feline infectious peritonitis virus					CHEMBL4295624	Replicase polyprotein 1ab	Feline coronavirus (strain FIPV WSU-79/1146) (FCoV)	SINGLE PROTEIN	CHEMBL4196085	1	Scientific Literature	Eur J Med Chem	2018
CHEMBL4212620		0	524.66	1	2.52	9e	CCC1(OC(=O)N[C@@H](CC(C)C)C(=O)N[C@H](C=O)C[C@@H]2CCNC2=O)CCN(C(=O)OC(C)(C)C)CC1	IC50	'='	5500	nM	5.26			UO_0000065	10.02	0.19	2.74	3.67	FALSE	CHEMBL4198707	Inhibition of Feline infectious peritonitis virus 3CL protease using Dabcyl-KTSAVLQ/SGFRKME-Edans as substrate incubated for 30 mins followed by substrate addition measured after 1 hr by FRET assay	B	BAO_0000357	single protein format	Feline infectious peritonitis virus					CHEMBL4295624	Replicase polyprotein 1ab	Feline coronavirus (strain FIPV WSU-79/1146) (FCoV)	SINGLE PROTEIN	CHEMBL4196085	1	Scientific Literature	Eur J Med Chem	2018
CHEMBL4204431		0	572.61	1	-0.03	10f	CCOC(=O)N1CCC(OC(=O)N[C@@H](CC(C)C)C(=O)N[C@@H](C[C@@H]2CCNC2=O)C(O)S(=O)(=O)[O-])CC1.[Na+]	IC50	'='	1100	nM	5.96			UO_0000065	10.82	0.22	5.99	2.97	FALSE	CHEMBL4198707	Inhibition of Feline infectious peritonitis virus 3CL protease using Dabcyl-KTSAVLQ/SGFRKME-Edans as substrate incubated for 30 mins followed by substrate addition measured after 1 hr by FRET assay	B	BAO_0000357	single protein format	Feline infectious peritonitis virus					CHEMBL4295624	Replicase polyprotein 1ab	Feline coronavirus (strain FIPV WSU-79/1146) (FCoV)	SINGLE PROTEIN	CHEMBL4196085	1	Scientific Literature	Eur J Med Chem	2018
CHEMBL4209146		0	474.58	0	-0.24	9b	CC(C)C[C@H](NC(=O)OC1CCN(S(C)(=O)=O)CC1)C(=O)N[C@H](C=O)C[C@@H]1CCNC1=O	IC50	'='	3500	nM	5.46			UO_0000065	11.5	0.23	5.7	3.61	FALSE	CHEMBL4198707	Inhibition of Feline infectious peritonitis virus 3CL protease using Dabcyl-KTSAVLQ/SGFRKME-Edans as substrate incubated for 30 mins followed by substrate addition measured after 1 hr by FRET assay	B	BAO_0000357	single protein format	Feline infectious peritonitis virus					CHEMBL4295624	Replicase polyprotein 1ab	Feline coronavirus (strain FIPV WSU-79/1146) (FCoV)	SINGLE PROTEIN	CHEMBL4196085	1	Scientific Literature	Eur J Med Chem	2018
CHEMBL4208764		0	668.77	1	0.38	10d	CC(C)C[C@H](NC(=O)OC1(Cc2ccccc2)CCN(S(C)(=O)=O)CC1)C(=O)N[C@@H](C[C@@H]1CCNC1=O)C(O)S(=O)(=O)[O-].[Na+]	IC50	'='	1100	nM	5.96			UO_0000065	9.21	0.19	5.58	2.86	FALSE	CHEMBL4198707	Inhibition of Feline infectious peritonitis virus 3CL protease using Dabcyl-KTSAVLQ/SGFRKME-Edans as substrate incubated for 30 mins followed by substrate addition measured after 1 hr by FRET assay	B	BAO_0000357	single protein format	Feline infectious peritonitis virus					CHEMBL4295624	Replicase polyprotein 1ab	Feline coronavirus (strain FIPV WSU-79/1146) (FCoV)	SINGLE PROTEIN	CHEMBL4196085	1	Scientific Literature	Eur J Med Chem	2018
CHEMBL4216101		0	628.72	1	1.52	10e	CCC1(OC(=O)N[C@@H](CC(C)C)C(=O)N[C@@H](C[C@@H]2CCNC2=O)C(O)S(=O)(=O)[O-])CCN(C(=O)OC(C)(C)C)CC1.[Na+]	IC50	'='	6700	nM	5.17			UO_0000065	8.53	0.17	3.65	2.58	FALSE	CHEMBL4198707	Inhibition of Feline infectious peritonitis virus 3CL protease using Dabcyl-KTSAVLQ/SGFRKME-Edans as substrate incubated for 30 mins followed by substrate addition measured after 1 hr by FRET assay	B	BAO_0000357	single protein format	Feline infectious peritonitis virus					CHEMBL4295624	Replicase polyprotein 1ab	Feline coronavirus (strain FIPV WSU-79/1146) (FCoV)	SINGLE PROTEIN	CHEMBL4196085	1	Scientific Literature	Eur J Med Chem	2018
CHEMBL4202812		0	586.73	1	3.35	9c	CC(C)C[C@H](NC(=O)OC1(Cc2ccccc2)CCN(C(=O)OC(C)(C)C)CC1)C(=O)N[C@H](C=O)C[C@@H]1CCNC1=O	IC50	'='	1600	nM	5.8			UO_0000065	9.88	0.19	2.45	4.05	FALSE	CHEMBL4198707	Inhibition of Feline infectious peritonitis virus 3CL protease using Dabcyl-KTSAVLQ/SGFRKME-Edans as substrate incubated for 30 mins followed by substrate addition measured after 1 hr by FRET assay	B	BAO_0000357	single protein format	Feline infectious peritonitis virus					CHEMBL4295624	Replicase polyprotein 1ab	Feline coronavirus (strain FIPV WSU-79/1146) (FCoV)	SINGLE PROTEIN	CHEMBL4196085	1	Scientific Literature	Eur J Med Chem	2018
CHEMBL4214066		0	496.61	0	1.74	9a	CC(C)C[C@H](NC(=O)OC1CCN(C(=O)OC(C)(C)C)CC1)C(=O)N[C@H](C=O)C[C@@H]1CCNC1=O	IC50	'='	800	nM	6.1			UO_0000065	12.28	0.24	4.36	4.26	FALSE	CHEMBL4198707	Inhibition of Feline infectious peritonitis virus 3CL protease using Dabcyl-KTSAVLQ/SGFRKME-Edans as substrate incubated for 30 mins followed by substrate addition measured after 1 hr by FRET assay	B	BAO_0000357	single protein format	Feline infectious peritonitis virus					CHEMBL4295624	Replicase polyprotein 1ab	Feline coronavirus (strain FIPV WSU-79/1146) (FCoV)	SINGLE PROTEIN	CHEMBL4196085	1	Scientific Literature	Eur J Med Chem	2018
CHEMBL4203883		0	690.79	1	2.36	10c	CC(C)C[C@H](NC(=O)OC1(Cc2ccccc2)CCN(C(=O)OC(C)(C)C)CC1)C(=O)N[C@@H](C[C@@H]1CCNC1=O)C(O)S(=O)(=O)[O-].[Na+]	IC50	'='	2100	nM	5.68			UO_0000065	8.49	0.17	3.32	2.83	FALSE	CHEMBL4198707	Inhibition of Feline infectious peritonitis virus 3CL protease using Dabcyl-KTSAVLQ/SGFRKME-Edans as substrate incubated for 30 mins followed by substrate addition measured after 1 hr by FRET assay	B	BAO_0000357	single protein format	Feline infectious peritonitis virus					CHEMBL4295624	Replicase polyprotein 1ab	Feline coronavirus (strain FIPV WSU-79/1146) (FCoV)	SINGLE PROTEIN	CHEMBL4196085	1	Scientific Literature	Eur J Med Chem	2018
CHEMBL4217568		0	468.55	0	0.96	9f	CCOC(=O)N1CCC(OC(=O)N[C@@H](CC(C)C)C(=O)N[C@H](C=O)C[C@@H]2CCNC2=O)CC1	IC50	'='	1300	nM	5.89			UO_0000065	12.56	0.24	4.93	4.11	FALSE	CHEMBL4198707	Inhibition of Feline infectious peritonitis virus 3CL protease using Dabcyl-KTSAVLQ/SGFRKME-Edans as substrate incubated for 30 mins followed by substrate addition measured after 1 hr by FRET assay	B	BAO_0000357	single protein format	Feline infectious peritonitis virus					CHEMBL4295624	Replicase polyprotein 1ab	Feline coronavirus (strain FIPV WSU-79/1146) (FCoV)	SINGLE PROTEIN	CHEMBL4196085	1	Scientific Literature	Eur J Med Chem	2018
CHEMBL3706401		0	726.56	3	0.16	17	CCCCSc1ncnc2c1ncn2[C@@H]1O[C@H]([C@H](CSCC[C@H](N)C(=O)O)OP(=O)(O)OP(=O)(O)NP(=O)(O)O)[C@@H](O)[C@H]1O	Ki	'='	110	nM	6.96			UO_0000065	9.58	0.22	6.8	2.18	FALSE	CHEMBL715656	Inhibition constants against ATP substrate site of M-T (Novikoff Ascitic Hepatoma form) variant of rat Methionine adenosyltransferase	B	BAO_0000357	single protein format						CHEMBL2195	S-adenosylmethionine synthetase alpha and beta forms	Rattus norvegicus	SINGLE PROTEIN	CHEMBL1125171	1	Scientific Literature	J. Med. Chem.	1990
CHEMBL14249	ADENOSINE TRIPHOSPHATE	2	507.18	3	-1.63	ATP	Nc1ncnc2c1ncn2[C@@H]1O[C@H](COP(=O)(O)OP(=O)(O)OP(=O)(O)O)[C@@H](O)[C@H]1O	Relative Vmax	'='	100										FALSE	CHEMBL714250	Half maximal velocity relative to Methionine adenosyltransferase	B	BAO_0000357	single protein format						CHEMBL2195	S-adenosylmethionine synthetase alpha and beta forms	Rattus norvegicus	SINGLE PROTEIN	CHEMBL1123521	1	Scientific Literature	J. Med. Chem.	1986
CHEMBL335538		0	491.18	2	-0.6	14	Nc1ncnc2c1ncn2[C@H]1C[C@H](O)[C@@H](COP(=O)(O)OP(=O)(O)OP(=O)(O)O)O1	Km	'='	1540000	nM				UO_0000065					FALSE	CHEMBL714248	Inhibitory constant against rat liver Methionine adenosyltransferase I	B	BAO_0000019	assay format						CHEMBL2195	S-adenosylmethionine synthetase alpha and beta forms	Rattus norvegicus	SINGLE PROTEIN	CHEMBL1123521	1	Scientific Literature	J. Med. Chem.	1986
CHEMBL3706401		0	726.56	3	0.16	17	CCCCSc1ncnc2c1ncn2[C@@H]1O[C@H]([C@H](CSCC[C@H](N)C(=O)O)OP(=O)(O)OP(=O)(O)NP(=O)(O)O)[C@@H](O)[C@H]1O	Ki	'='	120	nM	6.92			UO_0000065	9.53	0.21	6.76	2.17	FALSE	CHEMBL715655	Inhibition constants against ATP substrate site of M-2 (kidney form) variant of rat Methionine adenosyltransferase	B	BAO_0000357	single protein format						CHEMBL2195	S-adenosylmethionine synthetase alpha and beta forms	Rattus norvegicus	SINGLE PROTEIN	CHEMBL1125171	1	Scientific Literature	J. Med. Chem.	1990
CHEMBL3706401		0	726.56	3	0.16	17	CCCCSc1ncnc2c1ncn2[C@@H]1O[C@H]([C@H](CSCC[C@H](N)C(=O)O)OP(=O)(O)OP(=O)(O)NP(=O)(O)O)[C@@H](O)[C@H]1O	Ki	'='	2900	nM	5.54			UO_0000065	7.62	0.17	5.38	1.73	FALSE	CHEMBL715824	Inhibition constants with Met (L-methionine) substrate site of M-2 (kidney form) variant of rat Methionine adenosyltransferase	B	BAO_0000357	single protein format						CHEMBL2195	S-adenosylmethionine synthetase alpha and beta forms	Rattus norvegicus	SINGLE PROTEIN	CHEMBL1125171	1	Scientific Literature	J. Med. Chem.	1990
CHEMBL1791430		0	521.21	3	-1.24	7a	CC(OP(=O)(O)OP(=O)(O)OP(=O)(O)O)[C@H]1O[C@@H](n2cnc3c(N)ncnc32)[C@H](O)[C@@H]1O	Ki	'='	9000	nM	5.05			UO_0000065	9.68	0.22	6.29	1.81	FALSE	CHEMBL714247	Inhibitory constant against rat liver Methionine adenosyltransferase I, activity expressed as Ki	B	BAO_0000019	assay format						CHEMBL2195	S-adenosylmethionine synthetase alpha and beta forms	Rattus norvegicus	SINGLE PROTEIN	CHEMBL1123521	1	Scientific Literature	J. Med. Chem.	1986
CHEMBL3706400		0	580.34	3	0.68	2	CCCCSc1ncnc2c1ncn2[C@@H]1O[C@H](COP(=O)(O)OP(=O)(O)OP(=O)(O)O)[C@@H](O)[C@H]1O	Ki	'='	310000	nM		Outside typical range		UO_0000065					FALSE	CHEMBL715655	Inhibition constants against ATP substrate site of M-2 (kidney form) variant of rat Methionine adenosyltransferase	B	BAO_0000357	single protein format						CHEMBL2195	S-adenosylmethionine synthetase alpha and beta forms	Rattus norvegicus	SINGLE PROTEIN	CHEMBL1125171	1	Scientific Literature	J. Med. Chem.	1990
CHEMBL1791433		0	553.28	3	-0.94	8a	CSC(OP(=O)(O)OP(=O)(O)OP(=O)(O)O)[C@H]1O[C@@H](n2cnc3c(N)ncnc32)[C@H](O)[C@@H]1O	Ki	'='	14000	nM	4.85			UO_0000065	8.77	0.2	5.79	1.74	FALSE	CHEMBL714247	Inhibitory constant against rat liver Methionine adenosyltransferase I, activity expressed as Ki	B	BAO_0000019	assay format						CHEMBL2195	S-adenosylmethionine synthetase alpha and beta forms	Rattus norvegicus	SINGLE PROTEIN	CHEMBL1123521	1	Scientific Literature	J. Med. Chem.	1986
CHEMBL335538		0	491.18	2	-0.6	14	Nc1ncnc2c1ncn2[C@H]1C[C@H](O)[C@@H](COP(=O)(O)OP(=O)(O)OP(=O)(O)O)O1	Relative Vmax	'='	26										FALSE	CHEMBL715825	Relative maximum velocity against liver (MAT-I) in rat methionine adenosyltransferase was reported	B	BAO_0000019	assay format						CHEMBL2195	S-adenosylmethionine synthetase alpha and beta forms	Rattus norvegicus	SINGLE PROTEIN	CHEMBL1123521	1	Scientific Literature	J. Med. Chem.	1986
CHEMBL298266		0	131.13	0	-0.81	(+)-I	N[C@]1(C(=O)O)CCOC1	Ki	'='	750000	nM		Outside typical range		UO_0000065					FALSE	CHEMBL805135	Compound was evaluated for its inhibitory activity against recombinant S-adenosyl L-Methionine synthetase (alpha-isoform) in rat liver	B	BAO_0000019	assay format						CHEMBL2195	S-adenosylmethionine synthetase alpha and beta forms	Rattus norvegicus	SINGLE PROTEIN	CHEMBL1130856	1	Scientific Literature	Bioorg. Med. Chem. Lett.	1998
CHEMBL608929		0	640.35	3	-1.73	4c	Nc1ncnc2c1nc(SCCC(N)C(=O)O)n2C1O[C@H](COP(=O)(O)OP(=O)(O)OP(=O)(O)O)[C@@H](O)[C@H]1O	Ki	'='	3300000	nM		Outside typical range		UO_0000065					FALSE	CHEMBL714246	Inhibitory constant against rat liver Methionine adenosyltransferase I	B	BAO_0000019	assay format						CHEMBL2195	S-adenosylmethionine synthetase alpha and beta forms	Rattus norvegicus	SINGLE PROTEIN	CHEMBL1123521	1	Scientific Literature	J. Med. Chem.	1986
CHEMBL335538		0	491.18	2	-0.6	14	Nc1ncnc2c1ncn2[C@H]1C[C@H](O)[C@@H](COP(=O)(O)OP(=O)(O)OP(=O)(O)O)O1	Inhibition potency	'='	0.091										FALSE	CHEMBL715827	Inhibitory potency against rat Methionine adenosyltransferase I	B	BAO_0000357	single protein format						CHEMBL2195	S-adenosylmethionine synthetase alpha and beta forms	Rattus norvegicus	SINGLE PROTEIN	CHEMBL1123521	1	Scientific Literature	J. Med. Chem.	1986
CHEMBL296778		0	145.16	0	-0.42	III	NC1(C(=O)O)CCOCC1	Ki	'='	1000000	nM		Outside typical range		UO_0000065					FALSE	CHEMBL805135	Compound was evaluated for its inhibitory activity against recombinant S-adenosyl L-Methionine synthetase (alpha-isoform) in rat liver	B	BAO_0000019	assay format						CHEMBL2195	S-adenosylmethionine synthetase alpha and beta forms	Rattus norvegicus	SINGLE PROTEIN	CHEMBL1130856	1	Scientific Literature	Bioorg. Med. Chem. Lett.	1998
CHEMBL297167		0	147.2	0	-0.09	(-)-II	N[C@]1(C(=O)O)CCSC1	Ki						Not Active						FALSE	CHEMBL872596	Compound was evaluated for its inhibitory activity against recombinant S-adenosyl L-Methionine synthetase (alpha-isoform) in rat liver; No significant activity	B	BAO_0000019	assay format						CHEMBL2195	S-adenosylmethionine synthetase alpha and beta forms	Rattus norvegicus	SINGLE PROTEIN	CHEMBL1130856	1	Scientific Literature	Bioorg. Med. Chem. Lett.	1998
CHEMBL3706402		0	653.4	3	-2.15	1	Nc1ncnc2c1ncn2[C@@H]1O[C@H]([C@H](CSCCC(N)C(=O)O)OP(=O)(O)OP(=O)(O)NP(=O)(O)O)[C@@H](O)[C@H]1O	Ki	'='	650	nM	6.19			UO_0000065	9.47	0.21	8.34	1.79	FALSE	CHEMBL715824	Inhibition constants with Met (L-methionine) substrate site of M-2 (kidney form) variant of rat Methionine adenosyltransferase	B	BAO_0000357	single protein format						CHEMBL2195	S-adenosylmethionine synthetase alpha and beta forms	Rattus norvegicus	SINGLE PROTEIN	CHEMBL1125171	1	Scientific Literature	J. Med. Chem.	1990
CHEMBL14249	ADENOSINE TRIPHOSPHATE	2	507.18	3	-1.63	ATP	Nc1ncnc2c1ncn2[C@@H]1O[C@H](COP(=O)(O)OP(=O)(O)OP(=O)(O)O)[C@@H](O)[C@H]1O	Km	'='	140000	nM				UO_0000065					FALSE	CHEMBL714249	Inhibitory constant against rat liver Methionine adenosyltransferase I, activity expressed as conc of Mg-ATP for half maximal velocity	B	BAO_0000019	assay format						CHEMBL2195	S-adenosylmethionine synthetase alpha and beta forms	Rattus norvegicus	SINGLE PROTEIN	CHEMBL1123521	1	Scientific Literature	J. Med. Chem.	1986
CHEMBL606221		0	521.21	3	-1.24	9	Nc1ncnc2c1ncn2C1O[C@H](CCOP(=O)(O)OP(=O)(O)OP(=O)(O)O)[C@@H](O)[C@H]1O	Ki	'='	15000	nM	4.82			UO_0000065	9.26	0.21	6.06	1.73	FALSE	CHEMBL714246	Inhibitory constant against rat liver Methionine adenosyltransferase I	B	BAO_0000019	assay format						CHEMBL2195	S-adenosylmethionine synthetase alpha and beta forms	Rattus norvegicus	SINGLE PROTEIN	CHEMBL1123521	1	Scientific Literature	J. Med. Chem.	1986
CHEMBL606221		0	521.21	3	-1.24	9	Nc1ncnc2c1ncn2C1O[C@H](CCOP(=O)(O)OP(=O)(O)OP(=O)(O)O)[C@@H](O)[C@H]1O	Inhibition potency	'='	9.3										FALSE	CHEMBL715827	Inhibitory potency against rat Methionine adenosyltransferase I	B	BAO_0000357	single protein format						CHEMBL2195	S-adenosylmethionine synthetase alpha and beta forms	Rattus norvegicus	SINGLE PROTEIN	CHEMBL1123521	1	Scientific Literature	J. Med. Chem.	1986
CHEMBL1791430		0	521.21	3	-1.24	7a	CC(OP(=O)(O)OP(=O)(O)OP(=O)(O)O)[C@H]1O[C@@H](n2cnc3c(N)ncnc32)[C@H](O)[C@@H]1O	Inhibition potency	'='	15.6										FALSE	CHEMBL715827	Inhibitory potency against rat Methionine adenosyltransferase I	B	BAO_0000357	single protein format						CHEMBL2195	S-adenosylmethionine synthetase alpha and beta forms	Rattus norvegicus	SINGLE PROTEIN	CHEMBL1123521	1	Scientific Literature	J. Med. Chem.	1986
CHEMBL295971		0	131.13	0	-0.44	L-cis-AMB	CO/C=C\[C@H](N)C(=O)O	Ki	'='	56000	nM	4.25			UO_0000065	32.42	0.65	4.69	5.86	FALSE	CHEMBL805135	Compound was evaluated for its inhibitory activity against recombinant S-adenosyl L-Methionine synthetase (alpha-isoform) in rat liver	B	BAO_0000019	assay format						CHEMBL2195	S-adenosylmethionine synthetase alpha and beta forms	Rattus norvegicus	SINGLE PROTEIN	CHEMBL1130856	1	Scientific Literature	Bioorg. Med. Chem. Lett.	1998
CHEMBL40198		0	161.23	0	0.3	IV	NC1(C(=O)O)CCSCC1	Ki	'='	3000000	nM		Outside typical range		UO_0000065					FALSE	CHEMBL805135	Compound was evaluated for its inhibitory activity against recombinant S-adenosyl L-Methionine synthetase (alpha-isoform) in rat liver	B	BAO_0000019	assay format						CHEMBL2195	S-adenosylmethionine synthetase alpha and beta forms	Rattus norvegicus	SINGLE PROTEIN	CHEMBL1130856	1	Scientific Literature	Bioorg. Med. Chem. Lett.	1998
CHEMBL295830	CYCLOLEUCINE	0	129.16	0	0.34	cycloleucine	NC1(C(=O)O)CCCC1	Ki	'='	516000	nM		Outside typical range		UO_0000065					FALSE	CHEMBL805135	Compound was evaluated for its inhibitory activity against recombinant S-adenosyl L-Methionine synthetase (alpha-isoform) in rat liver	B	BAO_0000019	assay format						CHEMBL2195	S-adenosylmethionine synthetase alpha and beta forms	Rattus norvegicus	SINGLE PROTEIN	CHEMBL1130856	1	Scientific Literature	Bioorg. Med. Chem. Lett.	1998
CHEMBL1791433		0	553.28	3	-0.94	8a	CSC(OP(=O)(O)OP(=O)(O)OP(=O)(O)O)[C@H]1O[C@@H](n2cnc3c(N)ncnc32)[C@H](O)[C@@H]1O	Inhibition potency	'='	10										FALSE	CHEMBL715827	Inhibitory potency against rat Methionine adenosyltransferase I	B	BAO_0000357	single protein format						CHEMBL2195	S-adenosylmethionine synthetase alpha and beta forms	Rattus norvegicus	SINGLE PROTEIN	CHEMBL1123521	1	Scientific Literature	J. Med. Chem.	1986
CHEMBL3706402		0	653.4	3	-2.15	1	Nc1ncnc2c1ncn2[C@@H]1O[C@H]([C@H](CSCCC(N)C(=O)O)OP(=O)(O)OP(=O)(O)NP(=O)(O)O)[C@@H](O)[C@H]1O	Ki	'='	130	nM	6.89			UO_0000065	10.54	0.24	9.04	1.99	FALSE	CHEMBL715655	Inhibition constants against ATP substrate site of M-2 (kidney form) variant of rat Methionine adenosyltransferase	B	BAO_0000357	single protein format						CHEMBL2195	S-adenosylmethionine synthetase alpha and beta forms	Rattus norvegicus	SINGLE PROTEIN	CHEMBL1125171	1	Scientific Literature	J. Med. Chem.	1990
CHEMBL42336	METHIONINE	4	149.22	0	0.15	Methionine	CSCC[C@H](N)C(=O)O	Km	'='	70000	nM				UO_0000065					FALSE	CHEMBL858382	Compound was evaluated for its inhibitory activity against recombinant S-adenosyl L-Methionine synthetase (alpha-isoform) in rat liver	B	BAO_0000019	assay format						CHEMBL2195	S-adenosylmethionine synthetase alpha and beta forms	Rattus norvegicus	SINGLE PROTEIN	CHEMBL1130856	1	Scientific Literature	Bioorg. Med. Chem. Lett.	1998
CHEMBL3706401		0	726.56	3	0.16	17	CCCCSc1ncnc2c1ncn2[C@@H]1O[C@H]([C@H](CSCC[C@H](N)C(=O)O)OP(=O)(O)OP(=O)(O)NP(=O)(O)O)[C@@H](O)[C@H]1O	Ki	'='	740	nM	6.13			UO_0000065	8.44	0.19	5.97	1.92	FALSE	CHEMBL715657	Inhibition constants against Met (L-methionine)P substrate site of M-T (Novikoff Ascitic Hepatoma form) variant of rat Methionine adenosyltransferase	B	BAO_0000357	single protein format						CHEMBL2195	S-adenosylmethionine synthetase alpha and beta forms	Rattus norvegicus	SINGLE PROTEIN	CHEMBL1125171	1	Scientific Literature	J. Med. Chem.	1990
CHEMBL297167		0	147.2	0	-0.09	(+)-II	N[C@]1(C(=O)O)CCSC1	Ki	'='	1040000	nM		Outside typical range		UO_0000065					FALSE	CHEMBL805135	Compound was evaluated for its inhibitory activity against recombinant S-adenosyl L-Methionine synthetase (alpha-isoform) in rat liver	B	BAO_0000019	assay format						CHEMBL2195	S-adenosylmethionine synthetase alpha and beta forms	Rattus norvegicus	SINGLE PROTEIN	CHEMBL1130856	1	Scientific Literature	Bioorg. Med. Chem. Lett.	1998
CHEMBL298266		0	131.13	0	-0.81	(-)-I	N[C@]1(C(=O)O)CCOC1	Ki						Not Active						FALSE	CHEMBL872596	Compound was evaluated for its inhibitory activity against recombinant S-adenosyl L-Methionine synthetase (alpha-isoform) in rat liver; No significant activity	B	BAO_0000019	assay format						CHEMBL2195	S-adenosylmethionine synthetase alpha and beta forms	Rattus norvegicus	SINGLE PROTEIN	CHEMBL1130856	1	Scientific Literature	Bioorg. Med. Chem. Lett.	1998
CHEMBL3706402		0	653.4	3	-2.15	1	Nc1ncnc2c1ncn2[C@@H]1O[C@H]([C@H](CSCCC(N)C(=O)O)OP(=O)(O)OP(=O)(O)NP(=O)(O)O)[C@@H](O)[C@H]1O	Ki	'='	210	nM	6.68			UO_0000065	10.22	0.23	8.83	1.93	FALSE	CHEMBL715656	Inhibition constants against ATP substrate site of M-T (Novikoff Ascitic Hepatoma form) variant of rat Methionine adenosyltransferase	B	BAO_0000357	single protein format						CHEMBL2195	S-adenosylmethionine synthetase alpha and beta forms	Rattus norvegicus	SINGLE PROTEIN	CHEMBL1125171	1	Scientific Literature	J. Med. Chem.	1990
CHEMBL3706400		0	580.34	3	0.68	2	CCCCSc1ncnc2c1ncn2[C@@H]1O[C@H](COP(=O)(O)OP(=O)(O)OP(=O)(O)O)[C@@H](O)[C@H]1O	Ki	'='	100000	nM	4			UO_0000065	6.89	0.16	3.32	1.58	FALSE	CHEMBL715656	Inhibition constants against ATP substrate site of M-T (Novikoff Ascitic Hepatoma form) variant of rat Methionine adenosyltransferase	B	BAO_0000357	single protein format						CHEMBL2195	S-adenosylmethionine synthetase alpha and beta forms	Rattus norvegicus	SINGLE PROTEIN	CHEMBL1125171	1	Scientific Literature	J. Med. Chem.	1990
CHEMBL3706402		0	653.4	3	-2.15	1	Nc1ncnc2c1ncn2[C@@H]1O[C@H]([C@H](CSCCC(N)C(=O)O)OP(=O)(O)OP(=O)(O)NP(=O)(O)O)[C@@H](O)[C@H]1O	Ki	'='	670	nM	6.17			UO_0000065	9.45	0.21	8.32	1.79	FALSE	CHEMBL715657	Inhibition constants against Met (L-methionine)P substrate site of M-T (Novikoff Ascitic Hepatoma form) variant of rat Methionine adenosyltransferase	B	BAO_0000357	single protein format						CHEMBL2195	S-adenosylmethionine synthetase alpha and beta forms	Rattus norvegicus	SINGLE PROTEIN	CHEMBL1125171	1	Scientific Literature	J. Med. Chem.	1990
CHEMBL606493		0	655.41	3	-2.27	2	NC(CCS[C@@H](CNP(=O)(O)OP(=O)(O)OP(=O)(O)O)[C@H]1OC(n2cnc3c2NC=NC3N)[C@H](O)[C@@H]1O)C(=O)O	Ki	'='	3000	nM	5.52			UO_0000065	8.43	0.19	7.79	1.61	FALSE	CHEMBL641415	Inhibition constants of M-2 Forms of rat methionine adenosyltransferase using Methionine as the variable substrate; Inhibition is non competitive type	B	BAO_0000224	protein format						CHEMBL2111450	S-adenosylmethionine synthetase (MAT 1 and MAT 2)	Rattus norvegicus	PROTEIN FAMILY	CHEMBL1123834	1	Scientific Literature	J. Med. Chem.	1987
CHEMBL1791425		0	667.42	3	-1.76	16	Nc1ncnc2c1ncn2[C@@H]1O[C@H](C(CCOP(=O)(O)OP(=O)(O)NP(=O)(O)O)SCCC(N)C(=O)O)[C@@H](O)[C@H]1O	Ki	'='	1500	nM	5.82			UO_0000065	8.73	0.19	7.58	1.69	FALSE	CHEMBL709852	Inhibition constant of Met varied compound was measured on MT variant methionine adenosyltransferase in rat ascitic hepatoma cells	B	BAO_0000219	cell-based format						CHEMBL2111450	S-adenosylmethionine synthetase (MAT 1 and MAT 2)	Rattus norvegicus	PROTEIN FAMILY	CHEMBL1124309	1	Scientific Literature	J. Med. Chem.	1988
CHEMBL1791425		0	667.42	3	-1.76	16	Nc1ncnc2c1ncn2[C@@H]1O[C@H](C(CCOP(=O)(O)OP(=O)(O)NP(=O)(O)O)SCCC(N)C(=O)O)[C@@H](O)[C@H]1O	Ki	'='	2100	nM	5.68			UO_0000065	8.51	0.19	7.44	1.64	FALSE	CHEMBL709851	Inhibition constant of Met varied compound was measured on M-2 variant methionine adenosyltransferase in rat kidney	B	BAO_0000019	assay format						CHEMBL2111450	S-adenosylmethionine synthetase (MAT 1 and MAT 2)	Rattus norvegicus	PROTEIN FAMILY	CHEMBL1124309	1	Scientific Literature	J. Med. Chem.	1988
CHEMBL49687		0	163.24	0	0.4	3a	CSC[C@@H](C)C(N)C(=O)O	Substrate activity	'='	348	c.p.m.									FALSE	CHEMBL878218	Substrate activity as rate of conversion of [C14]-ATP to [C14]-Adomet in relation to KM value of methionine with M-T of rat methionine adenosyltransferase	B	BAO_0000224	protein format	Rattus norvegicus					CHEMBL2111450	S-adenosylmethionine synthetase (MAT 1 and MAT 2)	Rattus norvegicus	PROTEIN FAMILY	CHEMBL1123437	1	Scientific Literature	J. Med. Chem.	1986
CHEMBL47063		0	163.24	0	0.54	4d	CS[C@@H](C)C[C@@H](N)C(=O)O	Inhibition	'='	14	%				UO_0000187					FALSE	CHEMBL873032	Compound (3 mM) was tested for the inhibition of conversion of [14C]methionine to [14C]-AdoMet by M-T (hepatoma tissue) of rat methionine adenosyltransferase	B	BAO_0000224	protein format						CHEMBL2111450	S-adenosylmethionine synthetase (MAT 1 and MAT 2)	Rattus norvegicus	PROTEIN FAMILY	CHEMBL1123437	1	Scientific Literature	J. Med. Chem.	1986
CHEMBL47860		0	163.24	0	0.54	2b	CSCC[C@@](C)(N)C(=O)O	Substrate activity	'='	40	c.p.m.									FALSE	CHEMBL878218	Substrate activity as rate of conversion of [C14]-ATP to [C14]-Adomet in relation to KM value of methionine with M-T of rat methionine adenosyltransferase	B	BAO_0000224	protein format	Rattus norvegicus					CHEMBL2111450	S-adenosylmethionine synthetase (MAT 1 and MAT 2)	Rattus norvegicus	PROTEIN FAMILY	CHEMBL1123437	1	Scientific Literature	J. Med. Chem.	1986
CHEMBL609078		0	653.4	3	-2.15	13a	Nc1ncnc2c1ncn2C1O[C@H]([C@H](CNP(=O)(O)OP(=O)(O)OP(=O)(O)O)SCCC(N)C(=O)O)[C@@H](O)[C@H]1O	Ki	'='	270	nM	6.57			UO_0000065	10.05	0.22	8.72	1.9	FALSE	CHEMBL709853	Inhibition constant of compound with Novikoff ascitic hepatoma (M-T) form of rat methionine adenosyltransferase when ATP was used as variable substrate;Competitive type of inhibition	B	BAO_0000224	protein format						CHEMBL2111450	S-adenosylmethionine synthetase (MAT 1 and MAT 2)	Rattus norvegicus	PROTEIN FAMILY	CHEMBL1123742	1	Scientific Literature	J. Med. Chem.	1987
CHEMBL607665		0	520.23	3	-1.67	14	Nc1ncnc2c1ncn2C1O[C@H](CCNP(=O)(O)OP(=O)(O)OP(=O)(O)O)[C@@H](O)[C@H]1O	Ki	'='	580000	nM		Outside typical range		UO_0000065					FALSE	CHEMBL715638	Inhibition constant of compound with kidney (M-2) form of rat methionine adenosyltransferase when methionine was used as variable substrate;Simple non-competitive type of inhibition	B	BAO_0000224	protein format						CHEMBL2111450	S-adenosylmethionine synthetase (MAT 1 and MAT 2)	Rattus norvegicus	PROTEIN FAMILY	CHEMBL1123742	1	Scientific Literature	J. Med. Chem.	1987
CHEMBL1791416		0	638.38	3	-1.66	15a	Nc1ncnc2c1ncn2[C@@H]1O[C@H](C(CP(=O)(O)OP(=O)(O)OP(=O)(O)O)SCCC(N)C(=O)O)[C@@H](O)[C@H]1O	Ki	'='	32000	nM	4.5			UO_0000065	7.04	0.16	6.15	1.35	FALSE	CHEMBL709853	Inhibition constant of compound with Novikoff ascitic hepatoma (M-T) form of rat methionine adenosyltransferase when ATP was used as variable substrate;Competitive type of inhibition	B	BAO_0000224	protein format						CHEMBL2111450	S-adenosylmethionine synthetase (MAT 1 and MAT 2)	Rattus norvegicus	PROTEIN FAMILY	CHEMBL1123742	1	Scientific Literature	J. Med. Chem.	1987
CHEMBL3706405		0	667.42	3	-1.76	2a	Nc1ncnc2c1ncn2[C@@H]1O[C@H]([C@H](CCSCCC(N)C(=O)O)OP(=O)(O)OP(=O)(O)NP(=O)(O)O)[C@@H](O)[C@H]1O	Ki	'='	410	nM	6.39			UO_0000065	9.57	0.21	8.15	1.85	FALSE	CHEMBL709683	Compound was tested for inhibition constant with kidney form of M-T variants of Rat methionine adenosyltransferase when ATP was the variable substrate	B	BAO_0000224	protein format						CHEMBL2111450	S-adenosylmethionine synthetase (MAT 1 and MAT 2)	Rattus norvegicus	PROTEIN FAMILY	CHEMBL1124617	1	Scientific Literature	J. Med. Chem.	1989
CHEMBL47063		0	163.24	0	0.54	4d	CS[C@@H](C)C[C@@H](N)C(=O)O	Substrate activity	'='	173	c.p.m.									FALSE	CHEMBL878218	Substrate activity as rate of conversion of [C14]-ATP to [C14]-Adomet in relation to KM value of methionine with M-T of rat methionine adenosyltransferase	B	BAO_0000224	protein format	Rattus norvegicus					CHEMBL2111450	S-adenosylmethionine synthetase (MAT 1 and MAT 2)	Rattus norvegicus	PROTEIN FAMILY	CHEMBL1123437	1	Scientific Literature	J. Med. Chem.	1986
CHEMBL132722	DIPHOSPHOMETHYLPHOSPHONIC ACID ADENOSYL ESTER	0	505.21	3	-1.52	10	Nc1ncnc2c1ncn2[C@@H]1O[C@H](COP(=O)(O)CP(=O)(O)OP(=O)(O)O)[C@@H](O)[C@H]1O	Inhibition potency	'='	0.41										FALSE	CHEMBL709692	Inhibitory potency against rat Methionine adenosyltransferase was reported	B	BAO_0000224	protein format						CHEMBL2111450	S-adenosylmethionine synthetase (MAT 1 and MAT 2)	Rattus norvegicus	PROTEIN FAMILY	CHEMBL1123521	1	Scientific Literature	J. Med. Chem.	1986
CHEMBL1791416		0	638.38	3	-1.66	15b	Nc1ncnc2c1ncn2[C@@H]1O[C@H](C(CP(=O)(O)OP(=O)(O)OP(=O)(O)O)SCCC(N)C(=O)O)[C@@H](O)[C@H]1O	Ki	'='	148000	nM		Outside typical range		UO_0000065					FALSE	CHEMBL709854	Inhibition constant of compound with Novikoff ascitic hepatoma (M-T) form of rat methionine adenosyltransferase when ATP was used as variable substrate competitive type of inhibition	B	BAO_0000224	protein format						CHEMBL2111450	S-adenosylmethionine synthetase (MAT 1 and MAT 2)	Rattus norvegicus	PROTEIN FAMILY	CHEMBL1123742	1	Scientific Literature	J. Med. Chem.	1987
CHEMBL610404		0	563.29	3	0	2	CCCCNc1ncnc2c1ncn2C1O[C@H](COP(=O)(O)OP(=O)(O)OP(=O)(O)O)[C@@H](O)[C@H]1O	Inhibition potency T/II	'='	2.5										FALSE	CHEMBL845626	Relative inhibitory potency T/II in rat methionine adenosyltransferase	B	BAO_0000019	assay format						CHEMBL2111450	S-adenosylmethionine synthetase (MAT 1 and MAT 2)	Rattus norvegicus	PROTEIN FAMILY	CHEMBL1123521	1	Scientific Literature	J. Med. Chem.	1986
CHEMBL49574		0	163.24	0	0.54	2a	CSCC[C@](C)(N)C(=O)O	Km	'='	21000000	nM				UO_0000065					FALSE	CHEMBL858218	Substrate activity with normal tissue (M-T) form of rat methionine adenosyltransferase	B	BAO_0000224	protein format						CHEMBL2111450	S-adenosylmethionine synthetase (MAT 1 and MAT 2)	Rattus norvegicus	PROTEIN FAMILY	CHEMBL1123437	1	Scientific Literature	J. Med. Chem.	1986
CHEMBL607665		0	520.23	3	-1.67	14	Nc1ncnc2c1ncn2C1O[C@H](CCNP(=O)(O)OP(=O)(O)OP(=O)(O)O)[C@@H](O)[C@H]1O	Ki	'='	14000	nM	4.85			UO_0000065	9.33	0.21	6.52	1.72	FALSE	CHEMBL872556	Inhibition constant of compound with kidney (M-2) form of rat methionine adenosyltransferase when ATP was used as variable substrate;Competitive type of inhibition	B	BAO_0000224	protein format						CHEMBL2111450	S-adenosylmethionine synthetase (MAT 1 and MAT 2)	Rattus norvegicus	PROTEIN FAMILY	CHEMBL1123742	1	Scientific Literature	J. Med. Chem.	1987
CHEMBL49574		0	163.24	0	0.54	2a	CSCC[C@](C)(N)C(=O)O	Substrate activity	'='	241	c.p.m.									FALSE	CHEMBL878218	Substrate activity as rate of conversion of [C14]-ATP to [C14]-Adomet in relation to KM value of methionine with M-T of rat methionine adenosyltransferase	B	BAO_0000224	protein format	Rattus norvegicus					CHEMBL2111450	S-adenosylmethionine synthetase (MAT 1 and MAT 2)	Rattus norvegicus	PROTEIN FAMILY	CHEMBL1123437	1	Scientific Literature	J. Med. Chem.	1986
CHEMBL1791433		0	553.28	3	-0.94	8a	CSC(OP(=O)(O)OP(=O)(O)OP(=O)(O)O)[C@H]1O[C@@H](n2cnc3c(N)ncnc32)[C@H](O)[C@@H]1O	Inhibition potency	'='	0.19										FALSE	CHEMBL709693	Inhibitory potency against rat methionine adenosyltransferase was reported	B	BAO_0000224	protein format						CHEMBL2111450	S-adenosylmethionine synthetase (MAT 1 and MAT 2)	Rattus norvegicus	PROTEIN FAMILY	CHEMBL1123521	1	Scientific Literature	J. Med. Chem.	1986
CHEMBL1791426		0	653.4	3	-2.15	13b	Nc1ncnc2c1ncn2[C@@H]1O[C@H]([C@@H](CNP(=O)(O)OP(=O)(O)OP(=O)(O)O)SCCC(N)C(=O)O)[C@@H](O)[C@H]1O	Ki	'='	270	nM	6.57			UO_0000065	10.05	0.22	8.72	1.9	FALSE	CHEMBL709849	Inhibition constant of ATP varied compound was measured on MT variant methionine adenosyltransferase in rat ascitic hepatoma cells	B	BAO_0000219	cell-based format						CHEMBL2111450	S-adenosylmethionine synthetase (MAT 1 and MAT 2)	Rattus norvegicus	PROTEIN FAMILY	CHEMBL1124309	1	Scientific Literature	J. Med. Chem.	1988
CHEMBL3706404		0	667.42	3	-1.76	2a	Nc1ncnc2c1ncn2[C@@H]1O[C@H]([C@@H](CCSCCC(N)C(=O)O)OP(=O)(O)OP(=O)(O)NP(=O)(O)O)[C@@H](O)[C@H]1O	Ki	'='	160	nM	6.8			UO_0000065	10.18	0.23	8.56	1.97	FALSE	CHEMBL709683	Compound was tested for inhibition constant with kidney form of M-T variants of Rat methionine adenosyltransferase when ATP was the variable substrate	B	BAO_0000224	protein format						CHEMBL2111450	S-adenosylmethionine synthetase (MAT 1 and MAT 2)	Rattus norvegicus	PROTEIN FAMILY	CHEMBL1124617	1	Scientific Literature	J. Med. Chem.	1989
CHEMBL606493		0	655.41	3	-2.27	2	NC(CCS[C@@H](CNP(=O)(O)OP(=O)(O)OP(=O)(O)O)[C@H]1OC(n2cnc3c2NC=NC3N)[C@H](O)[C@@H]1O)C(=O)O	Ki	'='	2300	nM	5.64			UO_0000065	8.6	0.19	7.91	1.64	FALSE	CHEMBL641418	Inhibition constants of MT Forms of rat Novikoff Ascitic Hepatomae using Methionine as the variable substrate; Inhibition is non competitive type	B	BAO_0000224	protein format						CHEMBL2111450	S-adenosylmethionine synthetase (MAT 1 and MAT 2)	Rattus norvegicus	PROTEIN FAMILY	CHEMBL1123834	1	Scientific Literature	J. Med. Chem.	1987
CHEMBL609809		0	536.22	3	-1.59	4a	CNc1nc2c(N)ncnc2n1C1O[C@H](COP(=O)(O)OP(=O)(O)OP(=O)(O)O)[C@@H](O)[C@H]1O	Km	'='	230000	nM				UO_0000065					FALSE	CHEMBL715646	Inhibitory constant against rat Methionine adenosyltransferase was reported	B	BAO_0000224	protein format						CHEMBL2111450	S-adenosylmethionine synthetase (MAT 1 and MAT 2)	Rattus norvegicus	PROTEIN FAMILY	CHEMBL1123521	1	Scientific Literature	J. Med. Chem.	1986
CHEMBL609809		0	536.22	3	-1.59	4a	CNc1nc2c(N)ncnc2n1C1O[C@H](COP(=O)(O)OP(=O)(O)OP(=O)(O)O)[C@@H](O)[C@H]1O	Relative Vmax	'='	19										FALSE	CHEMBL715648	Relative maximum velocity against rat Methionine adenosyltransferase was reported	B	BAO_0000224	protein format						CHEMBL2111450	S-adenosylmethionine synthetase (MAT 1 and MAT 2)	Rattus norvegicus	PROTEIN FAMILY	CHEMBL1123521	1	Scientific Literature	J. Med. Chem.	1986
CHEMBL1791416		0	638.38	3	-1.66	14a	Nc1ncnc2c1ncn2[C@@H]1O[C@H](C(CP(=O)(O)OP(=O)(O)OP(=O)(O)O)SCCC(N)C(=O)O)[C@@H](O)[C@H]1O	Ki	'='	62000	nM	4.21			UO_0000065	6.59	0.15	5.87	1.26	TRUE	CHEMBL715642	Inhibition constant was evaluated with kidney (MAT-2) form of rat methionine adenosyltransferase, when methionine was the variable substrate (2 mM)	B	BAO_0000224	protein format						CHEMBL2111450	S-adenosylmethionine synthetase (MAT 1 and MAT 2)	Rattus norvegicus	PROTEIN FAMILY	CHEMBL1123194	1	Scientific Literature	J. Med. Chem.	1986
CHEMBL1230989		0	506.2	3	-2.06	12	Nc1ncnc2c1ncn2[C@@H]1O[C@H](COP(=O)(O)OP(=O)(O)NP(=O)(O)O)[C@@H](O)[C@H]1O	Inhibition potency	'='	35										FALSE	CHEMBL709692	Inhibitory potency against rat Methionine adenosyltransferase was reported	B	BAO_0000224	protein format						CHEMBL2111450	S-adenosylmethionine synthetase (MAT 1 and MAT 2)	Rattus norvegicus	PROTEIN FAMILY	CHEMBL1123521	1	Scientific Literature	J. Med. Chem.	1986
CHEMBL1791426		0	653.4	3	-2.15	15	Nc1ncnc2c1ncn2[C@@H]1O[C@H]([C@@H](CNP(=O)(O)OP(=O)(O)OP(=O)(O)O)SCCC(N)C(=O)O)[C@@H](O)[C@H]1O	Ki	'='	2300	nM	5.64			UO_0000065	8.63	0.19	7.79	1.63	FALSE	CHEMBL709852	Inhibition constant of Met varied compound was measured on MT variant methionine adenosyltransferase in rat ascitic hepatoma cells	B	BAO_0000219	cell-based format						CHEMBL2111450	S-adenosylmethionine synthetase (MAT 1 and MAT 2)	Rattus norvegicus	PROTEIN FAMILY	CHEMBL1124309	1	Scientific Literature	J. Med. Chem.	1988
CHEMBL610977		0	566.31	3	0.64	3	CCCCSc1ncnc2c1ncn2C1O[C@H](OP(=O)(O)OP(=O)(O)OP(=O)(O)O)[C@@H](O)[C@H]1O	Inhibition potency	'='	1.4										FALSE	CHEMBL709693	Inhibitory potency against rat methionine adenosyltransferase was reported	B	BAO_0000224	protein format						CHEMBL2111450	S-adenosylmethionine synthetase (MAT 1 and MAT 2)	Rattus norvegicus	PROTEIN FAMILY	CHEMBL1123521	1	Scientific Literature	J. Med. Chem.	1986
CHEMBL3251357		0	553.28	3	-0.91	4b	CSc1nc2c(N)ncnc2n1[C@@H]1O[C@H](COP(=O)(O)OP(=O)(O)OP(=O)(O)O)[C@@H](O)[C@H]1O	Ki	'='	530000	nM		Outside typical range		UO_0000065					FALSE	CHEMBL878217	Inhibitory constant against rat Methionine adenosyltransferase was reported	B	BAO_0000224	protein format						CHEMBL2111450	S-adenosylmethionine synthetase (MAT 1 and MAT 2)	Rattus norvegicus	PROTEIN FAMILY	CHEMBL1123521	1	Scientific Literature	J. Med. Chem.	1986
CHEMBL609809		0	536.22	3	-1.59	4a	CNc1nc2c(N)ncnc2n1C1O[C@H](COP(=O)(O)OP(=O)(O)OP(=O)(O)O)[C@@H](O)[C@H]1O	Inhibition potency T/II	'='	0.69										FALSE	CHEMBL845626	Relative inhibitory potency T/II in rat methionine adenosyltransferase	B	BAO_0000019	assay format						CHEMBL2111450	S-adenosylmethionine synthetase (MAT 1 and MAT 2)	Rattus norvegicus	PROTEIN FAMILY	CHEMBL1123521	1	Scientific Literature	J. Med. Chem.	1986
CHEMBL606221		0	521.21	3	-1.24	9	Nc1ncnc2c1ncn2C1O[C@H](CCOP(=O)(O)OP(=O)(O)OP(=O)(O)O)[C@@H](O)[C@H]1O	Ki	'='	310000	nM		Outside typical range		UO_0000065					FALSE	CHEMBL878217	Inhibitory constant against rat Methionine adenosyltransferase was reported	B	BAO_0000224	protein format						CHEMBL2111450	S-adenosylmethionine synthetase (MAT 1 and MAT 2)	Rattus norvegicus	PROTEIN FAMILY	CHEMBL1123521	1	Scientific Literature	J. Med. Chem.	1986
CHEMBL14249	ADENOSINE TRIPHOSPHATE	2	507.18	3	-1.63	ATP	Nc1ncnc2c1ncn2[C@@H]1O[C@H](COP(=O)(O)OP(=O)(O)OP(=O)(O)O)[C@@H](O)[C@H]1O	Km	'='	140000	nM				UO_0000065					FALSE	CHEMBL715645	Inhibition of methionine adenosyltransferase in Novikoff Hepatoma(MAT-T), activity expressed as conc of Mg-ATP for half maximal velocity	B	BAO_0000224	protein format						CHEMBL2111450	S-adenosylmethionine synthetase (MAT 1 and MAT 2)	Rattus norvegicus	PROTEIN FAMILY	CHEMBL1123521	1	Scientific Literature	J. Med. Chem.	1986
CHEMBL3142845		0	521.21	3	-0.97	6	CO[C@@H]1[C@@H](COP(=O)(O)OP(=O)(O)OP(=O)(O)O)O[C@@H](n2cnc3c(N)ncnc32)[C@@H]1O	Ki	'='	180000	nM		Outside typical range		UO_0000065					FALSE	CHEMBL709694	Competitive inhibition of rat methionine adenosyltransferase, activity expressed as Ki	B	BAO_0000224	protein format						CHEMBL2111450	S-adenosylmethionine synthetase (MAT 1 and MAT 2)	Rattus norvegicus	PROTEIN FAMILY	CHEMBL1123521	1	Scientific Literature	J. Med. Chem.	1986
CHEMBL610977		0	566.31	3	0.64	3	CCCCSc1ncnc2c1ncn2C1O[C@H](OP(=O)(O)OP(=O)(O)OP(=O)(O)O)[C@@H](O)[C@H]1O	Inhibition potency T/II	'='	3.1										FALSE	CHEMBL845626	Relative inhibitory potency T/II in rat methionine adenosyltransferase	B	BAO_0000019	assay format						CHEMBL2111450	S-adenosylmethionine synthetase (MAT 1 and MAT 2)	Rattus norvegicus	PROTEIN FAMILY	CHEMBL1123521	1	Scientific Literature	J. Med. Chem.	1986
CHEMBL2092766		0	549.26	3	-0.46	5'(S)-PR-ATP	CCC[C@]1(COP(=O)(O)OP(=O)(O)OP(=O)(O)O)O[C@@H](n2cnc3c(N)ncnc32)[C@H](O)[C@@H]1O	Ki	'='	140000	nM		Outside typical range		UO_0000065					FALSE	CHEMBL715640	Inhibition constant was evaluated on novikoff hepatoma (MAT-T) form of rat methionine adenosyltransferase, when ATP was the variable substrate (60 uM)	B	BAO_0000224	protein format						CHEMBL2111450	S-adenosylmethionine synthetase (MAT 1 and MAT 2)	Rattus norvegicus	PROTEIN FAMILY	CHEMBL1123194	1	Scientific Literature	J. Med. Chem.	1986
CHEMBL49687		0	163.24	0	0.4	3a	CSC[C@@H](C)C(N)C(=O)O	Inhibition	'='	8.7	%				UO_0000187					FALSE	CHEMBL873032	Compound (3 mM) was tested for the inhibition of conversion of [14C]methionine to [14C]-AdoMet by M-T (hepatoma tissue) of rat methionine adenosyltransferase	B	BAO_0000224	protein format						CHEMBL2111450	S-adenosylmethionine synthetase (MAT 1 and MAT 2)	Rattus norvegicus	PROTEIN FAMILY	CHEMBL1123437	1	Scientific Literature	J. Med. Chem.	1986
CHEMBL603986		0	671.41	3	-2.33	3	NC(CCSC[C@@H](OP(=O)(O)OP(=O)(O)ONP(=O)(O)O)[C@H]1OC(n2cnc3c2NC=NC3N)[C@H](O)[C@@H]1O)C(=O)O	Ki	'='	650	nM	6.19			UO_0000065	9.22	0.21	8.52	1.75	FALSE	CHEMBL641415	Inhibition constants of M-2 Forms of rat methionine adenosyltransferase using Methionine as the variable substrate; Inhibition is non competitive type	B	BAO_0000224	protein format						CHEMBL2111450	S-adenosylmethionine synthetase (MAT 1 and MAT 2)	Rattus norvegicus	PROTEIN FAMILY	CHEMBL1123834	1	Scientific Literature	J. Med. Chem.	1987
CHEMBL45647		0	177.27	0	0.93	4c	CS[C@@H](C)C[C@](C)(N)C(=O)O	Ki	'='	2400000	nM		Outside typical range		UO_0000065					FALSE	CHEMBL709695	Competitive inhibitory activity against methionine adenosyltransferase	B	BAO_0000224	protein format						CHEMBL2111450	S-adenosylmethionine synthetase (MAT 1 and MAT 2)	Rattus norvegicus	PROTEIN FAMILY	CHEMBL1123437	1	Scientific Literature	J. Med. Chem.	1986
CHEMBL1791426		0	653.4	3	-2.15	15	Nc1ncnc2c1ncn2[C@@H]1O[C@H]([C@@H](CNP(=O)(O)OP(=O)(O)OP(=O)(O)O)SCCC(N)C(=O)O)[C@@H](O)[C@H]1O	Ki	'='	3000	nM	5.52			UO_0000065	8.45	0.19	7.67	1.6	FALSE	CHEMBL709851	Inhibition constant of Met varied compound was measured on M-2 variant methionine adenosyltransferase in rat kidney	B	BAO_0000019	assay format						CHEMBL2111450	S-adenosylmethionine synthetase (MAT 1 and MAT 2)	Rattus norvegicus	PROTEIN FAMILY	CHEMBL1124309	1	Scientific Literature	J. Med. Chem.	1988
CHEMBL1791432		0	549.26	3	-0.46	7b	CCCC(OP(=O)(O)OP(=O)(O)OP(=O)(O)O)[C@H]1O[C@@H](n2cnc3c(N)ncnc32)[C@H](O)[C@@H]1O	Inhibition potency	'='	3.78										FALSE	CHEMBL709693	Inhibitory potency against rat methionine adenosyltransferase was reported	B	BAO_0000224	protein format						CHEMBL2111450	S-adenosylmethionine synthetase (MAT 1 and MAT 2)	Rattus norvegicus	PROTEIN FAMILY	CHEMBL1123521	1	Scientific Literature	J. Med. Chem.	1986
CHEMBL49687		0	163.24	0	0.4	3a	CSC[C@@H](C)C(N)C(=O)O	Relative Vmax	'='	37										FALSE	CHEMBL715653	Substrate level that produces half the maximal velocity(M-T) of rat methionine adenosyltransferase	B	BAO_0000224	protein format						CHEMBL2111450	S-adenosylmethionine synthetase (MAT 1 and MAT 2)	Rattus norvegicus	PROTEIN FAMILY	CHEMBL1123437	1	Scientific Literature	J. Med. Chem.	1986
CHEMBL3706403		0	667.42	3	-1.76	14	Nc1ncnc2c1ncn2[C@@H]1O[C@H](CC(CSCC[C@H](N)C(=O)O)OP(=O)(O)OP(=O)(O)NP(=O)(O)O)[C@@H](O)[C@H]1O	Ki	'='	630	nM	6.2			UO_0000065	9.29	0.21	7.96	1.8	FALSE	CHEMBL709849	Inhibition constant of ATP varied compound was measured on MT variant methionine adenosyltransferase in rat ascitic hepatoma cells	B	BAO_0000219	cell-based format						CHEMBL2111450	S-adenosylmethionine synthetase (MAT 1 and MAT 2)	Rattus norvegicus	PROTEIN FAMILY	CHEMBL1124309	1	Scientific Literature	J. Med. Chem.	1988
CHEMBL46118		0	163.24	0	0.4	3d	CSC[C@@H](C)[C@@H](N)C(=O)O	Relative Vmax	'='	26										FALSE	CHEMBL715651	Substrate level that produces half the maximal velocity(M-2) of rat methionine adenosyl transferase	B	BAO_0000224	protein format						CHEMBL2111450	S-adenosylmethionine synthetase (MAT 1 and MAT 2)	Rattus norvegicus	PROTEIN FAMILY	CHEMBL1123437	1	Scientific Literature	J. Med. Chem.	1986
CHEMBL1230989		0	506.2	3	-2.06	12	Nc1ncnc2c1ncn2[C@@H]1O[C@H](COP(=O)(O)OP(=O)(O)NP(=O)(O)O)[C@@H](O)[C@H]1O	Inhibition potency T/II	'='	1.4										FALSE	CHEMBL845626	Relative inhibitory potency T/II in rat methionine adenosyltransferase	B	BAO_0000019	assay format						CHEMBL2111450	S-adenosylmethionine synthetase (MAT 1 and MAT 2)	Rattus norvegicus	PROTEIN FAMILY	CHEMBL1123521	1	Scientific Literature	J. Med. Chem.	1986
CHEMBL3706402		0	653.4	3	-2.15	1	Nc1ncnc2c1ncn2[C@@H]1O[C@H]([C@H](CSCCC(N)C(=O)O)OP(=O)(O)OP(=O)(O)NP(=O)(O)O)[C@@H](O)[C@H]1O	Ki	'='	210	nM	6.68			UO_0000065	10.22	0.23	8.83	1.93	FALSE	CHEMBL709683	Compound was tested for inhibition constant with kidney form of M-T variants of Rat methionine adenosyltransferase when ATP was the variable substrate	B	BAO_0000224	protein format						CHEMBL2111450	S-adenosylmethionine synthetase (MAT 1 and MAT 2)	Rattus norvegicus	PROTEIN FAMILY	CHEMBL1124617	1	Scientific Literature	J. Med. Chem.	1989
CHEMBL291210		0	163.24	0	0.4	3c	CSCC(C)C(N)C(=O)O	Substrate activity	'='	701	c.p.m.									FALSE	CHEMBL641420	Substrate activity of compound (4 mM) measured as the rate of conversion of [C14]-ATP to [C14]-Adomet in relation to KM value of methionine with M-T of rat MAT	B	BAO_0000224	protein format						CHEMBL2111450	S-adenosylmethionine synthetase (MAT 1 and MAT 2)	Rattus norvegicus	PROTEIN FAMILY	CHEMBL1123437	1	Scientific Literature	J. Med. Chem.	1986
CHEMBL609078		0	653.4	3	-2.15	13a	Nc1ncnc2c1ncn2C1O[C@H]([C@H](CNP(=O)(O)OP(=O)(O)OP(=O)(O)O)SCCC(N)C(=O)O)[C@@H](O)[C@H]1O	Ki	'='	360	nM	6.44			UO_0000065	9.86	0.22	8.59	1.87	FALSE	CHEMBL872556	Inhibition constant of compound with kidney (M-2) form of rat methionine adenosyltransferase when ATP was used as variable substrate;Competitive type of inhibition	B	BAO_0000224	protein format						CHEMBL2111450	S-adenosylmethionine synthetase (MAT 1 and MAT 2)	Rattus norvegicus	PROTEIN FAMILY	CHEMBL1123742	1	Scientific Literature	J. Med. Chem.	1987
CHEMBL603986		0	671.41	3	-2.33	3	NC(CCSC[C@@H](OP(=O)(O)OP(=O)(O)ONP(=O)(O)O)[C@H]1OC(n2cnc3c2NC=NC3N)[C@H](O)[C@@H]1O)C(=O)O	Ki	'='	670	nM	6.17			UO_0000065	9.2	0.21	8.5	1.75	FALSE	CHEMBL641418	Inhibition constants of MT Forms of rat Novikoff Ascitic Hepatomae using Methionine as the variable substrate; Inhibition is non competitive type	B	BAO_0000224	protein format						CHEMBL2111450	S-adenosylmethionine synthetase (MAT 1 and MAT 2)	Rattus norvegicus	PROTEIN FAMILY	CHEMBL1123834	1	Scientific Literature	J. Med. Chem.	1987
CHEMBL606221		0	521.21	3	-1.24	9	Nc1ncnc2c1ncn2C1O[C@H](CCOP(=O)(O)OP(=O)(O)OP(=O)(O)O)[C@@H](O)[C@H]1O	Inhibition potency	'='	0.45										FALSE	CHEMBL709692	Inhibitory potency against rat Methionine adenosyltransferase was reported	B	BAO_0000224	protein format						CHEMBL2111450	S-adenosylmethionine synthetase (MAT 1 and MAT 2)	Rattus norvegicus	PROTEIN FAMILY	CHEMBL1123521	1	Scientific Literature	J. Med. Chem.	1986
CHEMBL3142844		0	521.21	3	-0.97	5	CO[C@@H]1[C@H](O)[C@@H](COP(=O)(O)OP(=O)(O)OP(=O)(O)O)O[C@H]1n1cnc2c(N)ncnc21	Inhibition potency	'='	0.82										FALSE	CHEMBL709693	Inhibitory potency against rat methionine adenosyltransferase was reported	B	BAO_0000224	protein format						CHEMBL2111450	S-adenosylmethionine synthetase (MAT 1 and MAT 2)	Rattus norvegicus	PROTEIN FAMILY	CHEMBL1123521	1	Scientific Literature	J. Med. Chem.	1986
CHEMBL3142844		0	521.21	3	-0.97	5	CO[C@@H]1[C@H](O)[C@@H](COP(=O)(O)OP(=O)(O)OP(=O)(O)O)O[C@H]1n1cnc2c(N)ncnc21	Inhibition potency T/II	'='	0.82										FALSE	CHEMBL845626	Relative inhibitory potency T/II in rat methionine adenosyltransferase	B	BAO_0000019	assay format						CHEMBL2111450	S-adenosylmethionine synthetase (MAT 1 and MAT 2)	Rattus norvegicus	PROTEIN FAMILY	CHEMBL1123521	1	Scientific Literature	J. Med. Chem.	1986
CHEMBL335538		0	491.18	2	-0.6	14	Nc1ncnc2c1ncn2[C@H]1C[C@H](O)[C@@H](COP(=O)(O)OP(=O)(O)OP(=O)(O)O)O1	Relative Vmax						Not Determined						FALSE	CHEMBL715650	Relative maximum velocity against rat methionine adenosyltransferase was reported; Not determined	B	BAO_0000224	protein format						CHEMBL2111450	S-adenosylmethionine synthetase (MAT 1 and MAT 2)	Rattus norvegicus	PROTEIN FAMILY	CHEMBL1123521	1	Scientific Literature	J. Med. Chem.	1986
CHEMBL14249	ADENOSINE TRIPHOSPHATE	2	507.18	3	-1.63	6b	Nc1ncnc2c1ncn2[C@@H]1O[C@H](COP(=O)(O)OP(=O)(O)OP(=O)(O)O)[C@@H](O)[C@H]1O	Relative Vmax	'='	100										FALSE	CHEMBL715647	Half maximal velocity relative to methionine adenosyltransferase	B	BAO_0000224	protein format						CHEMBL2111450	S-adenosylmethionine synthetase (MAT 1 and MAT 2)	Rattus norvegicus	PROTEIN FAMILY	CHEMBL1123521	1	Scientific Literature	J. Med. Chem.	1986
CHEMBL3706403		0	667.42	3	-1.76	14	Nc1ncnc2c1ncn2[C@@H]1O[C@H](CC(CSCC[C@H](N)C(=O)O)OP(=O)(O)OP(=O)(O)NP(=O)(O)O)[C@@H](O)[C@H]1O	Ki	'='	2200	nM	5.66			UO_0000065	8.48	0.19	7.42	1.64	FALSE	CHEMBL709851	Inhibition constant of Met varied compound was measured on M-2 variant methionine adenosyltransferase in rat kidney	B	BAO_0000019	assay format						CHEMBL2111450	S-adenosylmethionine synthetase (MAT 1 and MAT 2)	Rattus norvegicus	PROTEIN FAMILY	CHEMBL1124309	1	Scientific Literature	J. Med. Chem.	1988
CHEMBL610977		0	566.31	3	0.64	3	CCCCSc1ncnc2c1ncn2C1O[C@H](OP(=O)(O)OP(=O)(O)OP(=O)(O)O)[C@@H](O)[C@H]1O	Ki	'='	100000	nM	4			UO_0000065	7.06	0.16	3.36	1.58	FALSE	CHEMBL709694	Competitive inhibition of rat methionine adenosyltransferase, activity expressed as Ki	B	BAO_0000224	protein format						CHEMBL2111450	S-adenosylmethionine synthetase (MAT 1 and MAT 2)	Rattus norvegicus	PROTEIN FAMILY	CHEMBL1123521	1	Scientific Literature	J. Med. Chem.	1986
CHEMBL3251357		0	553.28	3	-0.91	4b	CSc1nc2c(N)ncnc2n1[C@@H]1O[C@H](COP(=O)(O)OP(=O)(O)OP(=O)(O)O)[C@@H](O)[C@H]1O	Km	'='	200000	nM				UO_0000065					FALSE	CHEMBL715646	Inhibitory constant against rat Methionine adenosyltransferase was reported	B	BAO_0000224	protein format						CHEMBL2111450	S-adenosylmethionine synthetase (MAT 1 and MAT 2)	Rattus norvegicus	PROTEIN FAMILY	CHEMBL1123521	1	Scientific Literature	J. Med. Chem.	1986
CHEMBL3251357		0	553.28	3	-0.91	4b	CSc1nc2c(N)ncnc2n1[C@@H]1O[C@H](COP(=O)(O)OP(=O)(O)OP(=O)(O)O)[C@@H](O)[C@H]1O	Inhibition potency	'='	0.7										FALSE	CHEMBL709692	Inhibitory potency against rat Methionine adenosyltransferase was reported	B	BAO_0000224	protein format						CHEMBL2111450	S-adenosylmethionine synthetase (MAT 1 and MAT 2)	Rattus norvegicus	PROTEIN FAMILY	CHEMBL1123521	1	Scientific Literature	J. Med. Chem.	1986
CHEMBL3706402		0	653.4	3	-2.15	1	Nc1ncnc2c1ncn2[C@@H]1O[C@H]([C@H](CSCCC(N)C(=O)O)OP(=O)(O)OP(=O)(O)NP(=O)(O)O)[C@@H](O)[C@H]1O	Ki	'='	130	nM	6.89			UO_0000065	10.54	0.24	9.04	1.99	FALSE	CHEMBL713568	Compound was tested for inhibition constant with kidney form of M-2 variants of Rat methionine adenosyltransferase when ATP was the variable substrate	B	BAO_0000224	protein format						CHEMBL2111450	S-adenosylmethionine synthetase (MAT 1 and MAT 2)	Rattus norvegicus	PROTEIN FAMILY	CHEMBL1124617	1	Scientific Literature	J. Med. Chem.	1989
CHEMBL3706402		0	653.4	3	-2.15	13	Nc1ncnc2c1ncn2[C@@H]1O[C@H]([C@H](CSCCC(N)C(=O)O)OP(=O)(O)OP(=O)(O)NP(=O)(O)O)[C@@H](O)[C@H]1O	Ki	'='	650	nM	6.19			UO_0000065	9.47	0.21	8.34	1.79	TRUE	CHEMBL709850	Inhibition constant of Met varied compound was measured on M-2 variant Methionine adenosyltransferase in rat kidney	B	BAO_0000019	assay format						CHEMBL2111450	S-adenosylmethionine synthetase (MAT 1 and MAT 2)	Rattus norvegicus	PROTEIN FAMILY	CHEMBL1124309	1	Scientific Literature	J. Med. Chem.	1988
CHEMBL336208		0	553.28	3	-0.91	1	CSc1nc(N)c2ncn([C@@H]3O[C@H](COP(=O)(O)OP(=O)(O)OP(=O)(O)O)[C@@H](O)[C@H]3O)c2n1	Ki	'='	110000	nM		Outside typical range		UO_0000065					FALSE	CHEMBL878217	Inhibitory constant against rat Methionine adenosyltransferase was reported	B	BAO_0000224	protein format						CHEMBL2111450	S-adenosylmethionine synthetase (MAT 1 and MAT 2)	Rattus norvegicus	PROTEIN FAMILY	CHEMBL1123521	1	Scientific Literature	J. Med. Chem.	1986
CHEMBL1791432		0	549.26	3	-0.46	7b	CCCC(OP(=O)(O)OP(=O)(O)OP(=O)(O)O)[C@H]1O[C@@H](n2cnc3c(N)ncnc32)[C@H](O)[C@@H]1O	Ki	'='	37000	nM	4.43			UO_0000065	8.07	0.18	4.89	1.59	FALSE	CHEMBL709694	Competitive inhibition of rat methionine adenosyltransferase, activity expressed as Ki	B	BAO_0000224	protein format						CHEMBL2111450	S-adenosylmethionine synthetase (MAT 1 and MAT 2)	Rattus norvegicus	PROTEIN FAMILY	CHEMBL1123521	1	Scientific Literature	J. Med. Chem.	1986
CHEMBL606221		0	521.21	3	-1.24	9	Nc1ncnc2c1ncn2C1O[C@H](CCOP(=O)(O)OP(=O)(O)OP(=O)(O)O)[C@@H](O)[C@H]1O	Inhibition potency T/II	'='	0.24										FALSE	CHEMBL845626	Relative inhibitory potency T/II in rat methionine adenosyltransferase	B	BAO_0000019	assay format						CHEMBL2111450	S-adenosylmethionine synthetase (MAT 1 and MAT 2)	Rattus norvegicus	PROTEIN FAMILY	CHEMBL1123521	1	Scientific Literature	J. Med. Chem.	1986
CHEMBL3142845		0	521.21	3	-0.97	6	CO[C@@H]1[C@@H](COP(=O)(O)OP(=O)(O)OP(=O)(O)O)O[C@@H](n2cnc3c(N)ncnc32)[C@@H]1O	Inhibition potency	'='	0.78										FALSE	CHEMBL709693	Inhibitory potency against rat methionine adenosyltransferase was reported	B	BAO_0000224	protein format						CHEMBL2111450	S-adenosylmethionine synthetase (MAT 1 and MAT 2)	Rattus norvegicus	PROTEIN FAMILY	CHEMBL1123521	1	Scientific Literature	J. Med. Chem.	1986
CHEMBL1791426		0	653.4	3	-2.15	13b	Nc1ncnc2c1ncn2[C@@H]1O[C@H]([C@@H](CNP(=O)(O)OP(=O)(O)OP(=O)(O)O)SCCC(N)C(=O)O)[C@@H](O)[C@H]1O	Ki	'='	20000	nM	4.7			UO_0000065	7.19	0.16	6.85	1.36	FALSE	CHEMBL709853	Inhibition constant of compound with Novikoff ascitic hepatoma (M-T) form of rat methionine adenosyltransferase when ATP was used as variable substrate;Competitive type of inhibition	B	BAO_0000224	protein format						CHEMBL2111450	S-adenosylmethionine synthetase (MAT 1 and MAT 2)	Rattus norvegicus	PROTEIN FAMILY	CHEMBL1123742	1	Scientific Literature	J. Med. Chem.	1987
CHEMBL3706405		0	667.42	3	-1.76	2a	Nc1ncnc2c1ncn2[C@@H]1O[C@H]([C@H](CCSCCC(N)C(=O)O)OP(=O)(O)OP(=O)(O)NP(=O)(O)O)[C@@H](O)[C@H]1O	Ki	'='	5400	nM	5.27			UO_0000065	7.89	0.18	7.03	1.53	FALSE	CHEMBL709682	Compound was tested for inhibition constant with kidney form of M-2 variants of Rat methionine adenosyltransferase when Methionine was the variable substrate	B	BAO_0000224	protein format						CHEMBL2111450	S-adenosylmethionine synthetase (MAT 1 and MAT 2)	Rattus norvegicus	PROTEIN FAMILY	CHEMBL1124617	1	Scientific Literature	J. Med. Chem.	1989
CHEMBL1791431		0	581.33	3	-0.16	8b	CCCSC(OP(=O)(O)OP(=O)(O)OP(=O)(O)O)[C@H]1O[C@@H](n2cnc3c(N)ncnc32)[C@H](O)[C@@H]1O	Ki	'='	140000	nM		Outside typical range		UO_0000065					FALSE	CHEMBL709694	Competitive inhibition of rat methionine adenosyltransferase, activity expressed as Ki	B	BAO_0000224	protein format						CHEMBL2111450	S-adenosylmethionine synthetase (MAT 1 and MAT 2)	Rattus norvegicus	PROTEIN FAMILY	CHEMBL1123521	1	Scientific Literature	J. Med. Chem.	1986
CHEMBL3706402		0	653.4	3	-2.15	1	Nc1ncnc2c1ncn2[C@@H]1O[C@H]([C@H](CSCCC(N)C(=O)O)OP(=O)(O)OP(=O)(O)NP(=O)(O)O)[C@@H](O)[C@H]1O	Ki	'='	670	nM	6.17			UO_0000065	9.45	0.21	8.32	1.79	FALSE	CHEMBL709684	Compound was tested for inhibition constant with kidney form of M-T variants of Rat methionine adenosyltransferase when Methionine was the variable substrate	B	BAO_0000224	protein format						CHEMBL2111450	S-adenosylmethionine synthetase (MAT 1 and MAT 2)	Rattus norvegicus	PROTEIN FAMILY	CHEMBL1124617	1	Scientific Literature	J. Med. Chem.	1989
CHEMBL3706404		0	667.42	3	-1.76	2a	Nc1ncnc2c1ncn2[C@@H]1O[C@H]([C@@H](CCSCCC(N)C(=O)O)OP(=O)(O)OP(=O)(O)NP(=O)(O)O)[C@@H](O)[C@H]1O	Ki	'='	2100	nM	5.68			UO_0000065	8.51	0.19	7.44	1.64	FALSE	CHEMBL709682	Compound was tested for inhibition constant with kidney form of M-2 variants of Rat methionine adenosyltransferase when Methionine was the variable substrate	B	BAO_0000224	protein format						CHEMBL2111450	S-adenosylmethionine synthetase (MAT 1 and MAT 2)	Rattus norvegicus	PROTEIN FAMILY	CHEMBL1124617	1	Scientific Literature	J. Med. Chem.	1989
CHEMBL1791430		0	521.21	3	-1.24	7a	CC(OP(=O)(O)OP(=O)(O)OP(=O)(O)O)[C@H]1O[C@@H](n2cnc3c(N)ncnc32)[C@H](O)[C@@H]1O	Inhibition potency T/II	'='	2.4										FALSE	CHEMBL845626	Relative inhibitory potency T/II in rat methionine adenosyltransferase	B	BAO_0000019	assay format						CHEMBL2111450	S-adenosylmethionine synthetase (MAT 1 and MAT 2)	Rattus norvegicus	PROTEIN FAMILY	CHEMBL1123521	1	Scientific Literature	J. Med. Chem.	1986
CHEMBL1791416		0	638.38	3	-1.66	15a	Nc1ncnc2c1ncn2[C@@H]1O[C@H](C(CP(=O)(O)OP(=O)(O)OP(=O)(O)O)SCCC(N)C(=O)O)[C@@H](O)[C@H]1O	Ki	'='	62000	nM	4.21			UO_0000065	6.59	0.15	5.87	1.26	FALSE	CHEMBL712418	Inhibition constant of compound with kidney (M-2) form of rat methionine adenosyltransferase when methionine was used as variable substrate;Competitive type of inhibition	B	BAO_0000224	protein format						CHEMBL2111450	S-adenosylmethionine synthetase (MAT 1 and MAT 2)	Rattus norvegicus	PROTEIN FAMILY	CHEMBL1123742	1	Scientific Literature	J. Med. Chem.	1987
CHEMBL609220		0	506.2	3	-1.66	13	Nc1ncnc2c1ncn2C1O[C@H](COP(=O)(O)OP(=O)(O)OP(N)(=O)O)[C@@H](O)[C@H]1O	Relative Vmax						Not Determined						FALSE	CHEMBL715649	Relative maximum velocity against rat Methionine adenosyltransferase was reported; Not determined	B	BAO_0000224	protein format						CHEMBL2111450	S-adenosylmethionine synthetase (MAT 1 and MAT 2)	Rattus norvegicus	PROTEIN FAMILY	CHEMBL1123521	1	Scientific Literature	J. Med. Chem.	1986
CHEMBL1791431		0	581.33	3	-0.16	8b	CCCSC(OP(=O)(O)OP(=O)(O)OP(=O)(O)O)[C@H]1O[C@@H](n2cnc3c(N)ncnc32)[C@H](O)[C@@H]1O	Inhibition potency T/II	'='	1.9										FALSE	CHEMBL845626	Relative inhibitory potency T/II in rat methionine adenosyltransferase	B	BAO_0000019	assay format						CHEMBL2111450	S-adenosylmethionine synthetase (MAT 1 and MAT 2)	Rattus norvegicus	PROTEIN FAMILY	CHEMBL1123521	1	Scientific Literature	J. Med. Chem.	1986
CHEMBL1791433		0	553.28	3	-0.94	8a	CSC(OP(=O)(O)OP(=O)(O)OP(=O)(O)O)[C@H]1O[C@@H](n2cnc3c(N)ncnc32)[C@H](O)[C@@H]1O	Inhibition potency T/II	'='	0.56										FALSE	CHEMBL845626	Relative inhibitory potency T/II in rat methionine adenosyltransferase	B	BAO_0000019	assay format						CHEMBL2111450	S-adenosylmethionine synthetase (MAT 1 and MAT 2)	Rattus norvegicus	PROTEIN FAMILY	CHEMBL1123521	1	Scientific Literature	J. Med. Chem.	1986
CHEMBL3706404		0	667.42	3	-1.76	2a	Nc1ncnc2c1ncn2[C@@H]1O[C@H]([C@@H](CCSCCC(N)C(=O)O)OP(=O)(O)OP(=O)(O)NP(=O)(O)O)[C@@H](O)[C@H]1O	Ki	'='	1100	nM	5.96			UO_0000065	8.93	0.2	7.72	1.73	FALSE	CHEMBL709684	Compound was tested for inhibition constant with kidney form of M-T variants of Rat methionine adenosyltransferase when Methionine was the variable substrate	B	BAO_0000224	protein format						CHEMBL2111450	S-adenosylmethionine synthetase (MAT 1 and MAT 2)	Rattus norvegicus	PROTEIN FAMILY	CHEMBL1124617	1	Scientific Literature	J. Med. Chem.	1989
CHEMBL3706404		0	667.42	3	-1.76	2a	Nc1ncnc2c1ncn2[C@@H]1O[C@H]([C@@H](CCSCCC(N)C(=O)O)OP(=O)(O)OP(=O)(O)NP(=O)(O)O)[C@@H](O)[C@H]1O	Ki	'='	110	nM	6.96			UO_0000065	10.43	0.23	8.72	2.02	FALSE	CHEMBL713568	Compound was tested for inhibition constant with kidney form of M-2 variants of Rat methionine adenosyltransferase when ATP was the variable substrate	B	BAO_0000224	protein format						CHEMBL2111450	S-adenosylmethionine synthetase (MAT 1 and MAT 2)	Rattus norvegicus	PROTEIN FAMILY	CHEMBL1124617	1	Scientific Literature	J. Med. Chem.	1989
CHEMBL48933		0	163.24	0	0.4	3b	CSC[C@@H](C)[C@H](N)C(=O)O	Substrate activity	'='	191	c.p.m.									FALSE	CHEMBL878218	Substrate activity as rate of conversion of [C14]-ATP to [C14]-Adomet in relation to KM value of methionine with M-T of rat methionine adenosyltransferase	B	BAO_0000224	protein format	Rattus norvegicus					CHEMBL2111450	S-adenosylmethionine synthetase (MAT 1 and MAT 2)	Rattus norvegicus	PROTEIN FAMILY	CHEMBL1123437	1	Scientific Literature	J. Med. Chem.	1986
CHEMBL3706402		0	653.4	3	-2.15	1	Nc1ncnc2c1ncn2[C@@H]1O[C@H]([C@H](CSCCC(N)C(=O)O)OP(=O)(O)OP(=O)(O)NP(=O)(O)O)[C@@H](O)[C@H]1O	Ki	'='	650	nM	6.19			UO_0000065	9.47	0.21	8.34	1.79	FALSE	CHEMBL709682	Compound was tested for inhibition constant with kidney form of M-2 variants of Rat methionine adenosyltransferase when Methionine was the variable substrate	B	BAO_0000224	protein format						CHEMBL2111450	S-adenosylmethionine synthetase (MAT 1 and MAT 2)	Rattus norvegicus	PROTEIN FAMILY	CHEMBL1124617	1	Scientific Literature	J. Med. Chem.	1989
CHEMBL297591		0	163.24	0	0.54	4b	CS[C@H](C)C[C@H](N)C(=O)O	Relative Vmax	'='	27										FALSE	CHEMBL715652	Substrate level that produces half the maximal velocity(M-2) of rat methionine adenosyltransferase	B	BAO_0000224	protein format						CHEMBL2111450	S-adenosylmethionine synthetase (MAT 1 and MAT 2)	Rattus norvegicus	PROTEIN FAMILY	CHEMBL1123437	1	Scientific Literature	J. Med. Chem.	1986
CHEMBL48185		0	163.24	0	0.41	5	CN[C@@H](CCSC)C(=O)O	Inhibition	'='	0	%				UO_0000187					FALSE	CHEMBL873032	Compound (3 mM) was tested for the inhibition of conversion of [14C]methionine to [14C]-AdoMet by M-T (hepatoma tissue) of rat methionine adenosyltransferase	B	BAO_0000224	protein format						CHEMBL2111450	S-adenosylmethionine synthetase (MAT 1 and MAT 2)	Rattus norvegicus	PROTEIN FAMILY	CHEMBL1123437	1	Scientific Literature	J. Med. Chem.	1986
CHEMBL3706402		0	653.4	3	-2.15	13	Nc1ncnc2c1ncn2[C@@H]1O[C@H]([C@H](CSCCC(N)C(=O)O)OP(=O)(O)OP(=O)(O)NP(=O)(O)O)[C@@H](O)[C@H]1O	Ki	'='	130	nM	6.89			UO_0000065	10.54	0.24	9.04	1.99	TRUE	CHEMBL880199	Inhibition constant of ATP varied compound was measured on M-2 variate Methionine adenosyltransferase in rat kidney	B	BAO_0000019	assay format						CHEMBL2111450	S-adenosylmethionine synthetase (MAT 1 and MAT 2)	Rattus norvegicus	PROTEIN FAMILY	CHEMBL1124309	1	Scientific Literature	J. Med. Chem.	1988
CHEMBL1791416		0	638.38	3	-1.66	15b	Nc1ncnc2c1ncn2[C@@H]1O[C@H](C(CP(=O)(O)OP(=O)(O)OP(=O)(O)O)SCCC(N)C(=O)O)[C@@H](O)[C@H]1O	Ki	'='	180000	nM		Outside typical range		UO_0000065					FALSE	CHEMBL872556	Inhibition constant of compound with kidney (M-2) form of rat methionine adenosyltransferase when ATP was used as variable substrate;Competitive type of inhibition	B	BAO_0000224	protein format						CHEMBL2111450	S-adenosylmethionine synthetase (MAT 1 and MAT 2)	Rattus norvegicus	PROTEIN FAMILY	CHEMBL1123742	1	Scientific Literature	J. Med. Chem.	1987
CHEMBL3706405		0	667.42	3	-1.76	2a	Nc1ncnc2c1ncn2[C@@H]1O[C@H]([C@H](CCSCCC(N)C(=O)O)OP(=O)(O)OP(=O)(O)NP(=O)(O)O)[C@@H](O)[C@H]1O	Ki	'='	2700	nM	5.57			UO_0000065	8.34	0.19	7.33	1.61	FALSE	CHEMBL709684	Compound was tested for inhibition constant with kidney form of M-T variants of Rat methionine adenosyltransferase when Methionine was the variable substrate	B	BAO_0000224	protein format						CHEMBL2111450	S-adenosylmethionine synthetase (MAT 1 and MAT 2)	Rattus norvegicus	PROTEIN FAMILY	CHEMBL1124617	1	Scientific Literature	J. Med. Chem.	1989
CHEMBL45530		0	163.24	0	0.54	4a	CSC(C)C[C@@H](N)C(=O)O	Relative Vmax	'='	26										FALSE	CHEMBL715652	Substrate level that produces half the maximal velocity(M-2) of rat methionine adenosyltransferase	B	BAO_0000224	protein format						CHEMBL2111450	S-adenosylmethionine synthetase (MAT 1 and MAT 2)	Rattus norvegicus	PROTEIN FAMILY	CHEMBL1123437	1	Scientific Literature	J. Med. Chem.	1986
CHEMBL47860		0	163.24	0	0.54	2b	CSCC[C@@](C)(N)C(=O)O	Inhibition	'='	3.7	%				UO_0000187					FALSE	CHEMBL709689	Compound (3 mM) was tested for the inhibition of conversion of [14C]methionine to [14C]AdoMet by M-T (hepatoma tissue) of methionine adenosyltransferase	B	BAO_0000224	protein format						CHEMBL2111450	S-adenosylmethionine synthetase (MAT 1 and MAT 2)	Rattus norvegicus	PROTEIN FAMILY	CHEMBL1123437	1	Scientific Literature	J. Med. Chem.	1986
CHEMBL1791426		0	653.4	3	-2.15	15	Nc1ncnc2c1ncn2[C@@H]1O[C@H]([C@@H](CNP(=O)(O)OP(=O)(O)OP(=O)(O)O)SCCC(N)C(=O)O)[C@@H](O)[C@H]1O	Ki	'='	360	nM	6.44			UO_0000065	9.86	0.22	8.59	1.87	FALSE	CHEMBL709696	Inhibition constant of ATP varied compound was measured on M-2 variate methionine adenosyltransferase in rat kidney	B	BAO_0000019	assay format						CHEMBL2111450	S-adenosylmethionine synthetase (MAT 1 and MAT 2)	Rattus norvegicus	PROTEIN FAMILY	CHEMBL1124309	1	Scientific Literature	J. Med. Chem.	1988
CHEMBL297591		0	163.24	0	0.54	4b	CS[C@H](C)C[C@H](N)C(=O)O	Substrate activity	'='	731	c.p.m.									FALSE	CHEMBL878218	Substrate activity as rate of conversion of [C14]-ATP to [C14]-Adomet in relation to KM value of methionine with M-T of rat methionine adenosyltransferase	B	BAO_0000224	protein format	Rattus norvegicus					CHEMBL2111450	S-adenosylmethionine synthetase (MAT 1 and MAT 2)	Rattus norvegicus	PROTEIN FAMILY	CHEMBL1123437	1	Scientific Literature	J. Med. Chem.	1986
CHEMBL42336	METHIONINE	4	149.22	0	0.15	1	CSCC[C@H](N)C(=O)O	Km	'='	15600	nM				UO_0000065					FALSE	CHEMBL641412	Substrate activity with normal tissue (M-T) form of rat methionine Adenosyltransferase	B	BAO_0000224	protein format						CHEMBL2111450	S-adenosylmethionine synthetase (MAT 1 and MAT 2)	Rattus norvegicus	PROTEIN FAMILY	CHEMBL1123437	1	Scientific Literature	J. Med. Chem.	1986
CHEMBL291210		0	163.24	0	0.4	3c	CSCC(C)C(N)C(=O)O	Ki	'='	500000	nM		Outside typical range		UO_0000065					FALSE	CHEMBL709695	Competitive inhibitory activity against methionine adenosyltransferase	B	BAO_0000224	protein format						CHEMBL2111450	S-adenosylmethionine synthetase (MAT 1 and MAT 2)	Rattus norvegicus	PROTEIN FAMILY	CHEMBL1123437	1	Scientific Literature	J. Med. Chem.	1986
CHEMBL48995		0	205.32	0	1.58	6	CCCCN[C@@H](CCSC)C(=O)O	Inhibition	'='	0	%				UO_0000187					FALSE	CHEMBL709689	Compound (3 mM) was tested for the inhibition of conversion of [14C]methionine to [14C]AdoMet by M-T (hepatoma tissue) of methionine adenosyltransferase	B	BAO_0000224	protein format						CHEMBL2111450	S-adenosylmethionine synthetase (MAT 1 and MAT 2)	Rattus norvegicus	PROTEIN FAMILY	CHEMBL1123437	1	Scientific Literature	J. Med. Chem.	1986
CHEMBL291210		0	163.24	0	0.4	3c	CSCC(C)C(N)C(=O)O	Km	'='	1400000	nM				UO_0000065					FALSE	CHEMBL641412	Substrate activity with normal tissue (M-T) form of rat methionine Adenosyltransferase	B	BAO_0000224	protein format						CHEMBL2111450	S-adenosylmethionine synthetase (MAT 1 and MAT 2)	Rattus norvegicus	PROTEIN FAMILY	CHEMBL1123437	1	Scientific Literature	J. Med. Chem.	1986
CHEMBL133463	PHOSPHOMETHYLPHOSPHONIC ACID ADENYLATE ESTER	0	505.21	3	-1.52	11	Nc1ncnc2c1ncn2[C@@H]1O[C@H](COP(=O)(O)OP(=O)(O)CP(=O)(O)O)[C@@H](O)[C@H]1O	Ki						Not Determined						FALSE	CHEMBL715643	Inhibitory constant against rat Methionine adenosyltransferase was reported; Not determined	B	BAO_0000224	protein format						CHEMBL2111450	S-adenosylmethionine synthetase (MAT 1 and MAT 2)	Rattus norvegicus	PROTEIN FAMILY	CHEMBL1123521	1	Scientific Literature	J. Med. Chem.	1986
CHEMBL3706402		0	653.4	3	-2.15	13	Nc1ncnc2c1ncn2[C@@H]1O[C@H]([C@H](CSCCC(N)C(=O)O)OP(=O)(O)OP(=O)(O)NP(=O)(O)O)[C@@H](O)[C@H]1O	Ki	'='	210	nM	6.68			UO_0000065	10.22	0.23	8.83	1.93	TRUE	CHEMBL709849	Inhibition constant of ATP varied compound was measured on MT variant methionine adenosyltransferase in rat ascitic hepatoma cells	B	BAO_0000219	cell-based format						CHEMBL2111450	S-adenosylmethionine synthetase (MAT 1 and MAT 2)	Rattus norvegicus	PROTEIN FAMILY	CHEMBL1124309	1	Scientific Literature	J. Med. Chem.	1988
CHEMBL49574		0	163.24	0	0.54	2a	CSCC[C@](C)(N)C(=O)O	Inhibition	'='	11	%				UO_0000187					FALSE	CHEMBL873032	Compound (3 mM) was tested for the inhibition of conversion of [14C]methionine to [14C]-AdoMet by M-T (hepatoma tissue) of rat methionine adenosyltransferase	B	BAO_0000224	protein format						CHEMBL2111450	S-adenosylmethionine synthetase (MAT 1 and MAT 2)	Rattus norvegicus	PROTEIN FAMILY	CHEMBL1123437	1	Scientific Literature	J. Med. Chem.	1986
CHEMBL603986		0	671.41	3	-2.33	3	NC(CCSC[C@@H](OP(=O)(O)OP(=O)(O)ONP(=O)(O)O)[C@H]1OC(n2cnc3c2NC=NC3N)[C@H](O)[C@@H]1O)C(=O)O	Ki	'='	210	nM	6.68			UO_0000065	9.95	0.22	9.01	1.89	FALSE	CHEMBL641416	Inhibition constants of MT Forms of rat Novikoff Ascitic Hepatomae using ATP as the variable substrate; Inhibition is competitive type	B	BAO_0000224	protein format						CHEMBL2111450	S-adenosylmethionine synthetase (MAT 1 and MAT 2)	Rattus norvegicus	PROTEIN FAMILY	CHEMBL1123834	1	Scientific Literature	J. Med. Chem.	1987
CHEMBL1791411		0	639.41	3	-2.2	1a	NC(CCSC(CP(=O)(O)OP(=O)(O)NP(=O)(O)O)[C@H]1O[C@@H](n2cnc3c2NC=NC3N)[C@H](O)[C@@H]1O)C(=O)O	Ki	'='	38000	nM	4.42			UO_0000065	6.91	0.15	6.62	1.32	FALSE	CHEMBL641417	Inhibition constants of MT Forms of rat Novikoff Ascitic Hepatomae using Methionine as the variable substrate; Inhibition is non competitive inhibition	B	BAO_0000224	protein format						CHEMBL2111450	S-adenosylmethionine synthetase (MAT 1 and MAT 2)	Rattus norvegicus	PROTEIN FAMILY	CHEMBL1123834	1	Scientific Literature	J. Med. Chem.	1987
CHEMBL1791416		0	638.38	3	-1.66	15a	Nc1ncnc2c1ncn2[C@@H]1O[C@H](C(CP(=O)(O)OP(=O)(O)OP(=O)(O)O)SCCC(N)C(=O)O)[C@@H](O)[C@H]1O	Ki	'='	39000	nM	4.41			UO_0000065	6.91	0.15	6.07	1.32	FALSE	CHEMBL872556	Inhibition constant of compound with kidney (M-2) form of rat methionine adenosyltransferase when ATP was used as variable substrate;Competitive type of inhibition	B	BAO_0000224	protein format						CHEMBL2111450	S-adenosylmethionine synthetase (MAT 1 and MAT 2)	Rattus norvegicus	PROTEIN FAMILY	CHEMBL1123742	1	Scientific Literature	J. Med. Chem.	1987
CHEMBL1791416		0	638.38	3	-1.66	15b	Nc1ncnc2c1ncn2[C@@H]1O[C@H](C(CP(=O)(O)OP(=O)(O)OP(=O)(O)O)SCCC(N)C(=O)O)[C@@H](O)[C@H]1O	Ki	'='	200000	nM		Outside typical range		UO_0000065					FALSE	CHEMBL715639	Inhibition constant of compound with kidney (M-2) form of rat methionine adenosyltransferase when methionine was used as variable substrate competitive type of inhibition	B	BAO_0000224	protein format						CHEMBL2111450	S-adenosylmethionine synthetase (MAT 1 and MAT 2)	Rattus norvegicus	PROTEIN FAMILY	CHEMBL1123742	1	Scientific Literature	J. Med. Chem.	1987
CHEMBL1791411		0	639.41	3	-2.2	1a	NC(CCSC(CP(=O)(O)OP(=O)(O)NP(=O)(O)O)[C@H]1O[C@@H](n2cnc3c2NC=NC3N)[C@H](O)[C@@H]1O)C(=O)O	Ki	'='	26000	nM	4.58			UO_0000065	7.17	0.16	6.79	1.37	FALSE	CHEMBL641414	Inhibition constants of M-2 Forms of rat methionine adenosyltransferase using Methionine as the variable substrate; Inhibition is competitive type	B	BAO_0000224	protein format						CHEMBL2111450	S-adenosylmethionine synthetase (MAT 1 and MAT 2)	Rattus norvegicus	PROTEIN FAMILY	CHEMBL1123834	1	Scientific Literature	J. Med. Chem.	1987
CHEMBL1791430		0	521.21	3	-1.24	7a	CC(OP(=O)(O)OP(=O)(O)OP(=O)(O)O)[C@H]1O[C@@H](n2cnc3c(N)ncnc32)[C@H](O)[C@@H]1O	Ki	'='	80000	nM	4.1			UO_0000065	7.86	0.17	5.34	1.47	FALSE	CHEMBL709694	Competitive inhibition of rat methionine adenosyltransferase, activity expressed as Ki	B	BAO_0000224	protein format						CHEMBL2111450	S-adenosylmethionine synthetase (MAT 1 and MAT 2)	Rattus norvegicus	PROTEIN FAMILY	CHEMBL1123521	1	Scientific Literature	J. Med. Chem.	1986
CHEMBL1791430		0	521.21	3	-1.24	7a	CC(OP(=O)(O)OP(=O)(O)OP(=O)(O)O)[C@H]1O[C@@H](n2cnc3c(N)ncnc32)[C@H](O)[C@@H]1O	Inhibition potency	'='	1.75										FALSE	CHEMBL709693	Inhibitory potency against rat methionine adenosyltransferase was reported	B	BAO_0000224	protein format						CHEMBL2111450	S-adenosylmethionine synthetase (MAT 1 and MAT 2)	Rattus norvegicus	PROTEIN FAMILY	CHEMBL1123521	1	Scientific Literature	J. Med. Chem.	1986
CHEMBL45647		0	177.27	0	0.93	4c	CS[C@@H](C)C[C@](C)(N)C(=O)O	Inhibition	'='	23	%				UO_0000187					FALSE	CHEMBL873032	Compound (3 mM) was tested for the inhibition of conversion of [14C]methionine to [14C]-AdoMet by M-T (hepatoma tissue) of rat methionine adenosyltransferase	B	BAO_0000224	protein format						CHEMBL2111450	S-adenosylmethionine synthetase (MAT 1 and MAT 2)	Rattus norvegicus	PROTEIN FAMILY	CHEMBL1123437	1	Scientific Literature	J. Med. Chem.	1986
CHEMBL49687		0	163.24	0	0.4	3a	CSC[C@@H](C)C(N)C(=O)O	Km	'='	20000000	nM				UO_0000065					FALSE	CHEMBL858218	Substrate activity with normal tissue (M-T) form of rat methionine adenosyltransferase	B	BAO_0000224	protein format						CHEMBL2111450	S-adenosylmethionine synthetase (MAT 1 and MAT 2)	Rattus norvegicus	PROTEIN FAMILY	CHEMBL1123437	1	Scientific Literature	J. Med. Chem.	1986
CHEMBL336208		0	553.28	3	-0.91	1	CSc1nc(N)c2ncn([C@@H]3O[C@H](COP(=O)(O)OP(=O)(O)OP(=O)(O)O)[C@@H](O)[C@H]3O)c2n1	Inhibition potency	'='	1.27										FALSE	CHEMBL709692	Inhibitory potency against rat Methionine adenosyltransferase was reported	B	BAO_0000224	protein format						CHEMBL2111450	S-adenosylmethionine synthetase (MAT 1 and MAT 2)	Rattus norvegicus	PROTEIN FAMILY	CHEMBL1123521	1	Scientific Literature	J. Med. Chem.	1986
CHEMBL48185		0	163.24	0	0.41	5	CN[C@@H](CCSC)C(=O)O	Substrate activity	'='	36	c.p.m.									FALSE	CHEMBL878218	Substrate activity as rate of conversion of [C14]-ATP to [C14]-Adomet in relation to KM value of methionine with M-T of rat methionine adenosyltransferase	B	BAO_0000224	protein format	Rattus norvegicus					CHEMBL2111450	S-adenosylmethionine synthetase (MAT 1 and MAT 2)	Rattus norvegicus	PROTEIN FAMILY	CHEMBL1123437	1	Scientific Literature	J. Med. Chem.	1986
CHEMBL49034		0	132.16	0	-0.99	7	CNCCC(N)C(=O)O	Substrate activity	'='	33	mM				UO_0000063					FALSE	CHEMBL715654	Rate of conversion of [C14]-ATP to [C14]-Adomet in relation to KM value of methionine with methionine adenosyltransferase	B	BAO_0000224	protein format						CHEMBL2111450	S-adenosylmethionine synthetase (MAT 1 and MAT 2)	Rattus norvegicus	PROTEIN FAMILY	CHEMBL1123437	1	Scientific Literature	J. Med. Chem.	1986
CHEMBL291210		0	163.24	0	0.4	3c	CSCC(C)C(N)C(=O)O	Relative Vmax	'='	12										FALSE	CHEMBL641419	Substrate level that produces half the maximal velocity(M-T) of rat methionine adenosyl transferase	B	BAO_0000224	protein format						CHEMBL2111450	S-adenosylmethionine synthetase (MAT 1 and MAT 2)	Rattus norvegicus	PROTEIN FAMILY	CHEMBL1123437	1	Scientific Literature	J. Med. Chem.	1986
CHEMBL1791417		0	654.38	3	-2.64	16a	Nc1ncnc2c1ncn2[C@@H]1O[C@H](C(CP(=O)(O)OP(=O)(O)OP(=O)(O)O)[S+]([O-])CCC(N)C(=O)O)[C@@H](O)[C@H]1O	Ki	'='	81000	nM	4.09			UO_0000065	6.25	0.14	6.73	1.17	FALSE	CHEMBL715640	Inhibition constant was evaluated on novikoff hepatoma (MAT-T) form of rat methionine adenosyltransferase, when ATP was the variable substrate (60 uM)	B	BAO_0000224	protein format						CHEMBL2111450	S-adenosylmethionine synthetase (MAT 1 and MAT 2)	Rattus norvegicus	PROTEIN FAMILY	CHEMBL1123194	1	Scientific Literature	J. Med. Chem.	1986
CHEMBL1791416		0	638.38	3	-1.66	14a	Nc1ncnc2c1ncn2[C@@H]1O[C@H](C(CP(=O)(O)OP(=O)(O)OP(=O)(O)O)SCCC(N)C(=O)O)[C@@H](O)[C@H]1O	Ki	'='	32000	nM	4.5			UO_0000065	7.04	0.16	6.15	1.35	TRUE	CHEMBL715640	Inhibition constant was evaluated on novikoff hepatoma (MAT-T) form of rat methionine adenosyltransferase, when ATP was the variable substrate (60 uM)	B	BAO_0000224	protein format						CHEMBL2111450	S-adenosylmethionine synthetase (MAT 1 and MAT 2)	Rattus norvegicus	PROTEIN FAMILY	CHEMBL1123194	1	Scientific Literature	J. Med. Chem.	1986
CHEMBL609078		0	653.4	3	-2.15	13a	Nc1ncnc2c1ncn2C1O[C@H]([C@H](CNP(=O)(O)OP(=O)(O)OP(=O)(O)O)SCCC(N)C(=O)O)[C@@H](O)[C@H]1O	Ki	'='	3000	nM	5.52			UO_0000065	8.45	0.19	7.67	1.6	FALSE	CHEMBL715638	Inhibition constant of compound with kidney (M-2) form of rat methionine adenosyltransferase when methionine was used as variable substrate;Simple non-competitive type of inhibition	B	BAO_0000224	protein format						CHEMBL2111450	S-adenosylmethionine synthetase (MAT 1 and MAT 2)	Rattus norvegicus	PROTEIN FAMILY	CHEMBL1123742	1	Scientific Literature	J. Med. Chem.	1987
CHEMBL1791415		0	637.4	3	-2.08	15a	Nc1ncnc2c1ncn2[C@@H]1O[C@H](C(CP(=O)(O)OP(=O)(O)NP(=O)(O)O)SCCC(N)C(=O)O)[C@@H](O)[C@H]1O	Ki	'='	11000	nM	4.96			UO_0000065	7.78	0.17	7.04	1.48	FALSE	CHEMBL715640	Inhibition constant was evaluated on novikoff hepatoma (MAT-T) form of rat methionine adenosyltransferase, when ATP was the variable substrate (60 uM)	B	BAO_0000224	protein format						CHEMBL2111450	S-adenosylmethionine synthetase (MAT 1 and MAT 2)	Rattus norvegicus	PROTEIN FAMILY	CHEMBL1123194	1	Scientific Literature	J. Med. Chem.	1986
CHEMBL1791415		0	637.4	3	-2.08	15a	Nc1ncnc2c1ncn2[C@@H]1O[C@H](C(CP(=O)(O)OP(=O)(O)NP(=O)(O)O)SCCC(N)C(=O)O)[C@@H](O)[C@H]1O	Ki	'='	38000	nM	4.42			UO_0000065	6.93	0.15	6.5	1.32	FALSE	CHEMBL715641	Inhibition constant was evaluated on novikoff hepatoma (MAT-T) form of rat methionine adenosyltransferase, when methionine was the variable substrate (2 mM)	B	BAO_0000224	protein format						CHEMBL2111450	S-adenosylmethionine synthetase (MAT 1 and MAT 2)	Rattus norvegicus	PROTEIN FAMILY	CHEMBL1123194	1	Scientific Literature	J. Med. Chem.	1986
CHEMBL3706405		0	667.42	3	-1.76	2a	Nc1ncnc2c1ncn2[C@@H]1O[C@H]([C@H](CCSCCC(N)C(=O)O)OP(=O)(O)OP(=O)(O)NP(=O)(O)O)[C@@H](O)[C@H]1O	Ki	'='	270	nM	6.57			UO_0000065	9.84	0.22	8.33	1.9	FALSE	CHEMBL713568	Compound was tested for inhibition constant with kidney form of M-2 variants of Rat methionine adenosyltransferase when ATP was the variable substrate	B	BAO_0000224	protein format						CHEMBL2111450	S-adenosylmethionine synthetase (MAT 1 and MAT 2)	Rattus norvegicus	PROTEIN FAMILY	CHEMBL1124617	1	Scientific Literature	J. Med. Chem.	1989
CHEMBL1791411		0	639.41	3	-2.2	1a	NC(CCSC(CP(=O)(O)OP(=O)(O)NP(=O)(O)O)[C@H]1O[C@@H](n2cnc3c2NC=NC3N)[C@H](O)[C@@H]1O)C(=O)O	Ki	'='	11000	nM	4.96			UO_0000065	7.75	0.17	7.16	1.48	FALSE	CHEMBL641416	Inhibition constants of MT Forms of rat Novikoff Ascitic Hepatomae using ATP as the variable substrate; Inhibition is competitive type	B	BAO_0000224	protein format						CHEMBL2111450	S-adenosylmethionine synthetase (MAT 1 and MAT 2)	Rattus norvegicus	PROTEIN FAMILY	CHEMBL1123834	1	Scientific Literature	J. Med. Chem.	1987
CHEMBL606493		0	655.41	3	-2.27	2	NC(CCS[C@@H](CNP(=O)(O)OP(=O)(O)OP(=O)(O)O)[C@H]1OC(n2cnc3c2NC=NC3N)[C@H](O)[C@@H]1O)C(=O)O	Ki	'='	360	nM	6.44			UO_0000065	9.83	0.22	8.71	1.87	FALSE	CHEMBL641413	Inhibition constants of M-2 Forms of rat methionine adenosyltransferase using ATP as the variable substrate; Inhibition is competitive type	B	BAO_0000224	protein format						CHEMBL2111450	S-adenosylmethionine synthetase (MAT 1 and MAT 2)	Rattus norvegicus	PROTEIN FAMILY	CHEMBL1123834	1	Scientific Literature	J. Med. Chem.	1987
CHEMBL132722	DIPHOSPHOMETHYLPHOSPHONIC ACID ADENOSYL ESTER	0	505.21	3	-1.52	10	Nc1ncnc2c1ncn2[C@@H]1O[C@H](COP(=O)(O)CP(=O)(O)OP(=O)(O)O)[C@@H](O)[C@H]1O	Ki	'='	340000	nM		Outside typical range		UO_0000065					FALSE	CHEMBL878217	Inhibitory constant against rat Methionine adenosyltransferase was reported	B	BAO_0000224	protein format						CHEMBL2111450	S-adenosylmethionine synthetase (MAT 1 and MAT 2)	Rattus norvegicus	PROTEIN FAMILY	CHEMBL1123521	1	Scientific Literature	J. Med. Chem.	1986
CHEMBL610404		0	563.29	3	0	2	CCCCNc1ncnc2c1ncn2C1O[C@H](COP(=O)(O)OP(=O)(O)OP(=O)(O)O)[C@@H](O)[C@H]1O	Ki	'='	210000	nM		Outside typical range		UO_0000065					FALSE	CHEMBL715644	Inhibitory constant against rat methionine adenosyltransferase was reported	B	BAO_0000224	protein format						CHEMBL2111450	S-adenosylmethionine synthetase (MAT 1 and MAT 2)	Rattus norvegicus	PROTEIN FAMILY	CHEMBL1123521	1	Scientific Literature	J. Med. Chem.	1986
CHEMBL1230989		0	506.2	3	-2.06	12	Nc1ncnc2c1ncn2[C@@H]1O[C@H](COP(=O)(O)OP(=O)(O)NP(=O)(O)O)[C@@H](O)[C@H]1O	Ki	'='	4000	nM	5.4			UO_0000065	10.66	0.24	7.46	1.91	FALSE	CHEMBL878217	Inhibitory constant against rat Methionine adenosyltransferase was reported	B	BAO_0000224	protein format						CHEMBL2111450	S-adenosylmethionine synthetase (MAT 1 and MAT 2)	Rattus norvegicus	PROTEIN FAMILY	CHEMBL1123521	1	Scientific Literature	J. Med. Chem.	1986
CHEMBL336208		0	553.28	3	-0.91	1	CSc1nc(N)c2ncn([C@@H]3O[C@H](COP(=O)(O)OP(=O)(O)OP(=O)(O)O)[C@@H](O)[C@H]3O)c2n1	Inhibition potency T/II	'='	5.5										FALSE	CHEMBL845626	Relative inhibitory potency T/II in rat methionine adenosyltransferase	B	BAO_0000019	assay format						CHEMBL2111450	S-adenosylmethionine synthetase (MAT 1 and MAT 2)	Rattus norvegicus	PROTEIN FAMILY	CHEMBL1123521	1	Scientific Literature	J. Med. Chem.	1986
CHEMBL132722	DIPHOSPHOMETHYLPHOSPHONIC ACID ADENOSYL ESTER	0	505.21	3	-1.52	10	Nc1ncnc2c1ncn2[C@@H]1O[C@H](COP(=O)(O)CP(=O)(O)OP(=O)(O)O)[C@@H](O)[C@H]1O	Inhibition potency T/II	'='	0.89										FALSE	CHEMBL845626	Relative inhibitory potency T/II in rat methionine adenosyltransferase	B	BAO_0000019	assay format						CHEMBL2111450	S-adenosylmethionine synthetase (MAT 1 and MAT 2)	Rattus norvegicus	PROTEIN FAMILY	CHEMBL1123521	1	Scientific Literature	J. Med. Chem.	1986
CHEMBL606493		0	655.41	3	-2.27	2	NC(CCS[C@@H](CNP(=O)(O)OP(=O)(O)OP(=O)(O)O)[C@H]1OC(n2cnc3c2NC=NC3N)[C@H](O)[C@@H]1O)C(=O)O	Ki	'='	270	nM	6.57			UO_0000065	10.02	0.22	8.84	1.91	FALSE	CHEMBL641416	Inhibition constants of MT Forms of rat Novikoff Ascitic Hepatomae using ATP as the variable substrate; Inhibition is competitive type	B	BAO_0000224	protein format						CHEMBL2111450	S-adenosylmethionine synthetase (MAT 1 and MAT 2)	Rattus norvegicus	PROTEIN FAMILY	CHEMBL1123834	1	Scientific Literature	J. Med. Chem.	1987
CHEMBL48933		0	163.24	0	0.4	3b	CSC[C@@H](C)[C@H](N)C(=O)O	Inhibition	'='	6.6	%				UO_0000187					FALSE	CHEMBL873032	Compound (3 mM) was tested for the inhibition of conversion of [14C]methionine to [14C]-AdoMet by M-T (hepatoma tissue) of rat methionine adenosyltransferase	B	BAO_0000224	protein format						CHEMBL2111450	S-adenosylmethionine synthetase (MAT 1 and MAT 2)	Rattus norvegicus	PROTEIN FAMILY	CHEMBL1123437	1	Scientific Literature	J. Med. Chem.	1986
CHEMBL3251357		0	553.28	3	-0.91	4b	CSc1nc2c(N)ncnc2n1[C@@H]1O[C@H](COP(=O)(O)OP(=O)(O)OP(=O)(O)O)[C@@H](O)[C@H]1O	Relative Vmax	'='	7.3										FALSE	CHEMBL715648	Relative maximum velocity against rat Methionine adenosyltransferase was reported	B	BAO_0000224	protein format						CHEMBL2111450	S-adenosylmethionine synthetase (MAT 1 and MAT 2)	Rattus norvegicus	PROTEIN FAMILY	CHEMBL1123521	1	Scientific Literature	J. Med. Chem.	1986
CHEMBL1791433		0	553.28	3	-0.94	8a	CSC(OP(=O)(O)OP(=O)(O)OP(=O)(O)O)[C@H]1O[C@@H](n2cnc3c(N)ncnc32)[C@H](O)[C@@H]1O	Ki	'='	750000	nM		Outside typical range		UO_0000065					FALSE	CHEMBL709694	Competitive inhibition of rat methionine adenosyltransferase, activity expressed as Ki	B	BAO_0000224	protein format						CHEMBL2111450	S-adenosylmethionine synthetase (MAT 1 and MAT 2)	Rattus norvegicus	PROTEIN FAMILY	CHEMBL1123521	1	Scientific Literature	J. Med. Chem.	1986
CHEMBL1791432		0	549.26	3	-0.46	7b	CCCC(OP(=O)(O)OP(=O)(O)OP(=O)(O)O)[C@H]1O[C@@H](n2cnc3c(N)ncnc32)[C@H](O)[C@@H]1O	Inhibition potency T/II	'='	1.3										FALSE	CHEMBL845626	Relative inhibitory potency T/II in rat methionine adenosyltransferase	B	BAO_0000019	assay format						CHEMBL2111450	S-adenosylmethionine synthetase (MAT 1 and MAT 2)	Rattus norvegicus	PROTEIN FAMILY	CHEMBL1123521	1	Scientific Literature	J. Med. Chem.	1986
CHEMBL603986		0	671.41	3	-2.33	3	NC(CCSC[C@@H](OP(=O)(O)OP(=O)(O)ONP(=O)(O)O)[C@H]1OC(n2cnc3c2NC=NC3N)[C@H](O)[C@@H]1O)C(=O)O	Ki	'='	130	nM	6.89			UO_0000065	10.26	0.23	9.22	1.95	FALSE	CHEMBL641413	Inhibition constants of M-2 Forms of rat methionine adenosyltransferase using ATP as the variable substrate; Inhibition is competitive type	B	BAO_0000224	protein format						CHEMBL2111450	S-adenosylmethionine synthetase (MAT 1 and MAT 2)	Rattus norvegicus	PROTEIN FAMILY	CHEMBL1123834	1	Scientific Literature	J. Med. Chem.	1987
CHEMBL1791431		0	581.33	3	-0.16	8b	CCCSC(OP(=O)(O)OP(=O)(O)OP(=O)(O)O)[C@H]1O[C@@H](n2cnc3c(N)ncnc32)[C@H](O)[C@@H]1O	Inhibition potency	'='	1										FALSE	CHEMBL709693	Inhibitory potency against rat methionine adenosyltransferase was reported	B	BAO_0000224	protein format						CHEMBL2111450	S-adenosylmethionine synthetase (MAT 1 and MAT 2)	Rattus norvegicus	PROTEIN FAMILY	CHEMBL1123521	1	Scientific Literature	J. Med. Chem.	1986
CHEMBL3142844		0	521.21	3	-0.97	5	CO[C@@H]1[C@H](O)[C@@H](COP(=O)(O)OP(=O)(O)OP(=O)(O)O)O[C@H]1n1cnc2c(N)ncnc21	Ki	'='	170000	nM		Outside typical range		UO_0000065					FALSE	CHEMBL709694	Competitive inhibition of rat methionine adenosyltransferase, activity expressed as Ki	B	BAO_0000224	protein format						CHEMBL2111450	S-adenosylmethionine synthetase (MAT 1 and MAT 2)	Rattus norvegicus	PROTEIN FAMILY	CHEMBL1123521	1	Scientific Literature	J. Med. Chem.	1986
CHEMBL45530		0	163.24	0	0.54	4a	CSC(C)C[C@@H](N)C(=O)O	Ki	'='	3200000	nM		Outside typical range		UO_0000065					FALSE	CHEMBL709695	Competitive inhibitory activity against methionine adenosyltransferase	B	BAO_0000224	protein format						CHEMBL2111450	S-adenosylmethionine synthetase (MAT 1 and MAT 2)	Rattus norvegicus	PROTEIN FAMILY	CHEMBL1123437	1	Scientific Literature	J. Med. Chem.	1986
CHEMBL48995		0	205.32	0	1.58	6	CCCCN[C@@H](CCSC)C(=O)O	Substrate activity	'='	13	c.p.m.									FALSE	CHEMBL878218	Substrate activity as rate of conversion of [C14]-ATP to [C14]-Adomet in relation to KM value of methionine with M-T of rat methionine adenosyltransferase	B	BAO_0000224	protein format	Rattus norvegicus					CHEMBL2111450	S-adenosylmethionine synthetase (MAT 1 and MAT 2)	Rattus norvegicus	PROTEIN FAMILY	CHEMBL1123437	1	Scientific Literature	J. Med. Chem.	1986
CHEMBL42336	METHIONINE	4	149.22	0	0.15	1	CSCC[C@H](N)C(=O)O	Relative Vmax	'='	100										FALSE	CHEMBL641419	Substrate level that produces half the maximal velocity(M-T) of rat methionine adenosyl transferase	B	BAO_0000224	protein format						CHEMBL2111450	S-adenosylmethionine synthetase (MAT 1 and MAT 2)	Rattus norvegicus	PROTEIN FAMILY	CHEMBL1123437	1	Scientific Literature	J. Med. Chem.	1986
CHEMBL3251357		0	553.28	3	-0.91	4b	CSc1nc2c(N)ncnc2n1[C@@H]1O[C@H](COP(=O)(O)OP(=O)(O)OP(=O)(O)O)[C@@H](O)[C@H]1O	Inhibition potency T/II	'='	0.5										FALSE	CHEMBL845626	Relative inhibitory potency T/II in rat methionine adenosyltransferase	B	BAO_0000019	assay format						CHEMBL2111450	S-adenosylmethionine synthetase (MAT 1 and MAT 2)	Rattus norvegicus	PROTEIN FAMILY	CHEMBL1123521	1	Scientific Literature	J. Med. Chem.	1986
CHEMBL49574		0	163.24	0	0.54	2a	CSCC[C@](C)(N)C(=O)O	Relative Vmax	'='	27										FALSE	CHEMBL715653	Substrate level that produces half the maximal velocity(M-T) of rat methionine adenosyltransferase	B	BAO_0000224	protein format						CHEMBL2111450	S-adenosylmethionine synthetase (MAT 1 and MAT 2)	Rattus norvegicus	PROTEIN FAMILY	CHEMBL1123437	1	Scientific Literature	J. Med. Chem.	1986
CHEMBL1791416		0	638.38	3	-1.66	14b	Nc1ncnc2c1ncn2[C@@H]1O[C@H](C(CP(=O)(O)OP(=O)(O)OP(=O)(O)O)SCCC(N)C(=O)O)[C@@H](O)[C@H]1O	Ki	'='	200000	nM		Outside typical range		UO_0000065					TRUE	CHEMBL715642	Inhibition constant was evaluated with kidney (MAT-2) form of rat methionine adenosyltransferase, when methionine was the variable substrate (2 mM)	B	BAO_0000224	protein format						CHEMBL2111450	S-adenosylmethionine synthetase (MAT 1 and MAT 2)	Rattus norvegicus	PROTEIN FAMILY	CHEMBL1123194	1	Scientific Literature	J. Med. Chem.	1986
CHEMBL1791425		0	667.42	3	-1.76	16	Nc1ncnc2c1ncn2[C@@H]1O[C@H](C(CCOP(=O)(O)OP(=O)(O)NP(=O)(O)O)SCCC(N)C(=O)O)[C@@H](O)[C@H]1O	Ki	'='	440	nM	6.36			UO_0000065	9.52	0.21	8.12	1.84	FALSE	CHEMBL709696	Inhibition constant of ATP varied compound was measured on M-2 variate methionine adenosyltransferase in rat kidney	B	BAO_0000019	assay format						CHEMBL2111450	S-adenosylmethionine synthetase (MAT 1 and MAT 2)	Rattus norvegicus	PROTEIN FAMILY	CHEMBL1124309	1	Scientific Literature	J. Med. Chem.	1988
CHEMBL45530		0	163.24	0	0.54	4a	CSC(C)C[C@@H](N)C(=O)O	Inhibition	'='	24	%				UO_0000187					FALSE	CHEMBL873032	Compound (3 mM) was tested for the inhibition of conversion of [14C]methionine to [14C]-AdoMet by M-T (hepatoma tissue) of rat methionine adenosyltransferase	B	BAO_0000224	protein format						CHEMBL2111450	S-adenosylmethionine synthetase (MAT 1 and MAT 2)	Rattus norvegicus	PROTEIN FAMILY	CHEMBL1123437	1	Scientific Literature	J. Med. Chem.	1986
CHEMBL45647		0	177.27	0	0.93	4c	CS[C@@H](C)C[C@](C)(N)C(=O)O	Substrate activity	'='	343	c.p.m.									FALSE	CHEMBL878218	Substrate activity as rate of conversion of [C14]-ATP to [C14]-Adomet in relation to KM value of methionine with M-T of rat methionine adenosyltransferase	B	BAO_0000224	protein format	Rattus norvegicus					CHEMBL2111450	S-adenosylmethionine synthetase (MAT 1 and MAT 2)	Rattus norvegicus	PROTEIN FAMILY	CHEMBL1123437	1	Scientific Literature	J. Med. Chem.	1986
CHEMBL291210		0	163.24	0	0.4	3c	CSCC(C)C(N)C(=O)O	Relative Vmax	'='	27										FALSE	CHEMBL641419	Substrate level that produces half the maximal velocity(M-T) of rat methionine adenosyl transferase	B	BAO_0000224	protein format						CHEMBL2111450	S-adenosylmethionine synthetase (MAT 1 and MAT 2)	Rattus norvegicus	PROTEIN FAMILY	CHEMBL1123437	1	Scientific Literature	J. Med. Chem.	1986
CHEMBL45530		0	163.24	0	0.54	4a	CSC(C)C[C@@H](N)C(=O)O	Substrate activity	'='	272	c.p.m.									FALSE	CHEMBL878218	Substrate activity as rate of conversion of [C14]-ATP to [C14]-Adomet in relation to KM value of methionine with M-T of rat methionine adenosyltransferase	B	BAO_0000224	protein format	Rattus norvegicus					CHEMBL2111450	S-adenosylmethionine synthetase (MAT 1 and MAT 2)	Rattus norvegicus	PROTEIN FAMILY	CHEMBL1123437	1	Scientific Literature	J. Med. Chem.	1986
CHEMBL2092766		0	549.26	3	-0.46	5'(R)-Pr-ATP	CCC[C@]1(COP(=O)(O)OP(=O)(O)OP(=O)(O)O)O[C@@H](n2cnc3c(N)ncnc32)[C@H](O)[C@@H]1O	Ki	'='	37000	nM	4.43			UO_0000065	8.07	0.18	4.89	1.59	FALSE	CHEMBL715640	Inhibition constant was evaluated on novikoff hepatoma (MAT-T) form of rat methionine adenosyltransferase, when ATP was the variable substrate (60 uM)	B	BAO_0000224	protein format						CHEMBL2111450	S-adenosylmethionine synthetase (MAT 1 and MAT 2)	Rattus norvegicus	PROTEIN FAMILY	CHEMBL1123194	1	Scientific Literature	J. Med. Chem.	1986
CHEMBL1791415		0	637.4	3	-2.08	15a	Nc1ncnc2c1ncn2[C@@H]1O[C@H](C(CP(=O)(O)OP(=O)(O)NP(=O)(O)O)SCCC(N)C(=O)O)[C@@H](O)[C@H]1O	Ki	'='	26000	nM	4.58			UO_0000065	7.19	0.16	6.67	1.36	FALSE	CHEMBL715642	Inhibition constant was evaluated with kidney (MAT-2) form of rat methionine adenosyltransferase, when methionine was the variable substrate (2 mM)	B	BAO_0000224	protein format						CHEMBL2111450	S-adenosylmethionine synthetase (MAT 1 and MAT 2)	Rattus norvegicus	PROTEIN FAMILY	CHEMBL1123194	1	Scientific Literature	J. Med. Chem.	1986
CHEMBL297591		0	163.24	0	0.54	4b	CS[C@H](C)C[C@H](N)C(=O)O	Inhibition	'='	15	%				UO_0000187					FALSE	CHEMBL873032	Compound (3 mM) was tested for the inhibition of conversion of [14C]methionine to [14C]-AdoMet by M-T (hepatoma tissue) of rat methionine adenosyltransferase	B	BAO_0000224	protein format						CHEMBL2111450	S-adenosylmethionine synthetase (MAT 1 and MAT 2)	Rattus norvegicus	PROTEIN FAMILY	CHEMBL1123437	1	Scientific Literature	J. Med. Chem.	1986
CHEMBL3706402		0	653.4	3	-2.15	13	Nc1ncnc2c1ncn2[C@@H]1O[C@H]([C@H](CSCCC(N)C(=O)O)OP(=O)(O)OP(=O)(O)NP(=O)(O)O)[C@@H](O)[C@H]1O	Ki	'='	670	nM	6.17			UO_0000065	9.45	0.21	8.32	1.79	TRUE	CHEMBL709852	Inhibition constant of Met varied compound was measured on MT variant methionine adenosyltransferase in rat ascitic hepatoma cells	B	BAO_0000219	cell-based format						CHEMBL2111450	S-adenosylmethionine synthetase (MAT 1 and MAT 2)	Rattus norvegicus	PROTEIN FAMILY	CHEMBL1124309	1	Scientific Literature	J. Med. Chem.	1988
CHEMBL3706403		0	667.42	3	-1.76	14	Nc1ncnc2c1ncn2[C@@H]1O[C@H](CC(CSCC[C@H](N)C(=O)O)OP(=O)(O)OP(=O)(O)NP(=O)(O)O)[C@@H](O)[C@H]1O	Ki	'='	2700	nM	5.57			UO_0000065	8.34	0.19	7.33	1.61	FALSE	CHEMBL709852	Inhibition constant of Met varied compound was measured on MT variant methionine adenosyltransferase in rat ascitic hepatoma cells	B	BAO_0000219	cell-based format						CHEMBL2111450	S-adenosylmethionine synthetase (MAT 1 and MAT 2)	Rattus norvegicus	PROTEIN FAMILY	CHEMBL1124309	1	Scientific Literature	J. Med. Chem.	1988
CHEMBL46118		0	163.24	0	0.4	3d	CSC[C@@H](C)[C@@H](N)C(=O)O	Substrate activity	'='	381	c.p.m.									FALSE	CHEMBL878218	Substrate activity as rate of conversion of [C14]-ATP to [C14]-Adomet in relation to KM value of methionine with M-T of rat methionine adenosyltransferase	B	BAO_0000224	protein format	Rattus norvegicus					CHEMBL2111450	S-adenosylmethionine synthetase (MAT 1 and MAT 2)	Rattus norvegicus	PROTEIN FAMILY	CHEMBL1123437	1	Scientific Literature	J. Med. Chem.	1986
CHEMBL3706403		0	667.42	3	-1.76	14	Nc1ncnc2c1ncn2[C@@H]1O[C@H](CC(CSCC[C@H](N)C(=O)O)OP(=O)(O)OP(=O)(O)NP(=O)(O)O)[C@@H](O)[C@H]1O	Ki	'='	390	nM	6.41			UO_0000065	9.6	0.21	8.17	1.86	FALSE	CHEMBL709696	Inhibition constant of ATP varied compound was measured on M-2 variate methionine adenosyltransferase in rat kidney	B	BAO_0000019	assay format						CHEMBL2111450	S-adenosylmethionine synthetase (MAT 1 and MAT 2)	Rattus norvegicus	PROTEIN FAMILY	CHEMBL1124309	1	Scientific Literature	J. Med. Chem.	1988
CHEMBL42336	METHIONINE	4	149.22	0	0.15	1	CSCC[C@H](N)C(=O)O	Relative Vmax	'='	100										FALSE	CHEMBL641419	Substrate level that produces half the maximal velocity(M-T) of rat methionine adenosyl transferase	B	BAO_0000224	protein format						CHEMBL2111450	S-adenosylmethionine synthetase (MAT 1 and MAT 2)	Rattus norvegicus	PROTEIN FAMILY	CHEMBL1123437	1	Scientific Literature	J. Med. Chem.	1986
CHEMBL46118		0	163.24	0	0.4	3d	CSC[C@@H](C)[C@@H](N)C(=O)O	Inhibition	'='	15	%				UO_0000187					FALSE	CHEMBL873032	Compound (3 mM) was tested for the inhibition of conversion of [14C]methionine to [14C]-AdoMet by M-T (hepatoma tissue) of rat methionine adenosyltransferase	B	BAO_0000224	protein format						CHEMBL2111450	S-adenosylmethionine synthetase (MAT 1 and MAT 2)	Rattus norvegicus	PROTEIN FAMILY	CHEMBL1123437	1	Scientific Literature	J. Med. Chem.	1986
CHEMBL45647		0	177.27	0	0.93	4c	CS[C@@H](C)C[C@](C)(N)C(=O)O	Relative Vmax	'='	22										FALSE	CHEMBL715652	Substrate level that produces half the maximal velocity(M-2) of rat methionine adenosyltransferase	B	BAO_0000224	protein format						CHEMBL2111450	S-adenosylmethionine synthetase (MAT 1 and MAT 2)	Rattus norvegicus	PROTEIN FAMILY	CHEMBL1123437	1	Scientific Literature	J. Med. Chem.	1986
CHEMBL291210		0	163.24	0	0.4	3c	CSCC(C)C(N)C(=O)O	Inhibition	'='	65	%				UO_0000187					FALSE	CHEMBL644078	Compound (3 mM) was tested for the inhibition of conversion of [14C]methionine to [14C]-AdoMet by M-T (hepatoma tissue) of rat methionine Adenosyltransferase	B	BAO_0000224	protein format						CHEMBL2111450	S-adenosylmethionine synthetase (MAT 1 and MAT 2)	Rattus norvegicus	PROTEIN FAMILY	CHEMBL1123437	1	Scientific Literature	J. Med. Chem.	1986
CHEMBL609078		0	653.4	3	-2.15	13a	Nc1ncnc2c1ncn2C1O[C@H]([C@H](CNP(=O)(O)OP(=O)(O)OP(=O)(O)O)SCCC(N)C(=O)O)[C@@H](O)[C@H]1O	Ki	'='	2300	nM	5.64			UO_0000065	8.63	0.19	7.79	1.63	FALSE	CHEMBL709855	Inhibition constant of compound with Novikoff ascitic hepatoma (M-T) form of rat methionine adenosyltransferase when methionine was used as variable substrate;Simple non-competitive type of inhibition	B	BAO_0000224	protein format						CHEMBL2111450	S-adenosylmethionine synthetase (MAT 1 and MAT 2)	Rattus norvegicus	PROTEIN FAMILY	CHEMBL1123742	1	Scientific Literature	J. Med. Chem.	1987
CHEMBL1791416		0	638.38	3	-1.66	14b	Nc1ncnc2c1ncn2[C@@H]1O[C@H](C(CP(=O)(O)OP(=O)(O)OP(=O)(O)O)SCCC(N)C(=O)O)[C@@H](O)[C@H]1O	Ki	'='	148000	nM		Outside typical range		UO_0000065					TRUE	CHEMBL715640	Inhibition constant was evaluated on novikoff hepatoma (MAT-T) form of rat methionine adenosyltransferase, when ATP was the variable substrate (60 uM)	B	BAO_0000224	protein format						CHEMBL2111450	S-adenosylmethionine synthetase (MAT 1 and MAT 2)	Rattus norvegicus	PROTEIN FAMILY	CHEMBL1123194	1	Scientific Literature	J. Med. Chem.	1986
CHEMBL3142845		0	521.21	3	-0.97	6	CO[C@@H]1[C@@H](COP(=O)(O)OP(=O)(O)OP(=O)(O)O)O[C@@H](n2cnc3c(N)ncnc32)[C@@H]1O	Inhibition potency T/II	'='	0.95										FALSE	CHEMBL845626	Relative inhibitory potency T/II in rat methionine adenosyltransferase	B	BAO_0000019	assay format						CHEMBL2111450	S-adenosylmethionine synthetase (MAT 1 and MAT 2)	Rattus norvegicus	PROTEIN FAMILY	CHEMBL1123521	1	Scientific Literature	J. Med. Chem.	1986
CHEMBL49034		0	132.16	0	-0.99	7	CNCCC(N)C(=O)O	Inhibition	'='	0	%				UO_0000187					FALSE	CHEMBL709690	Substrate activity with normal tissue(M-Tform of rat methionine adenosyltransferase	B	BAO_0000224	protein format						CHEMBL2111450	S-adenosylmethionine synthetase (MAT 1 and MAT 2)	Rattus norvegicus	PROTEIN FAMILY	CHEMBL1123437	1	Scientific Literature	J. Med. Chem.	1986
CHEMBL1791425		0	667.42	3	-1.76	16	Nc1ncnc2c1ncn2[C@@H]1O[C@H](C(CCOP(=O)(O)OP(=O)(O)NP(=O)(O)O)SCCC(N)C(=O)O)[C@@H](O)[C@H]1O	Ki	'='	810	nM	6.09			UO_0000065	9.13	0.2	7.85	1.76	FALSE	CHEMBL709849	Inhibition constant of ATP varied compound was measured on MT variant methionine adenosyltransferase in rat ascitic hepatoma cells	B	BAO_0000219	cell-based format						CHEMBL2111450	S-adenosylmethionine synthetase (MAT 1 and MAT 2)	Rattus norvegicus	PROTEIN FAMILY	CHEMBL1124309	1	Scientific Literature	J. Med. Chem.	1988
CHEMBL1791411		0	639.41	3	-2.2	1a	NC(CCSC(CP(=O)(O)OP(=O)(O)NP(=O)(O)O)[C@H]1O[C@@H](n2cnc3c2NC=NC3N)[C@H](O)[C@@H]1O)C(=O)O	Ki	'='	16000	nM	4.8			UO_0000065	7.5	0.17	7	1.43	FALSE	CHEMBL641413	Inhibition constants of M-2 Forms of rat methionine adenosyltransferase using ATP as the variable substrate; Inhibition is competitive type	B	BAO_0000224	protein format						CHEMBL2111450	S-adenosylmethionine synthetase (MAT 1 and MAT 2)	Rattus norvegicus	PROTEIN FAMILY	CHEMBL1123834	1	Scientific Literature	J. Med. Chem.	1987
CHEMBL610404		0	563.29	3	0	2	CCCCNc1ncnc2c1ncn2C1O[C@H](COP(=O)(O)OP(=O)(O)OP(=O)(O)O)[C@@H](O)[C@H]1O	Inhibition potency	'='	0.66										FALSE	CHEMBL709691	Inhibitory potency against Methionine adenosyltransferase was reported	B	BAO_0000224	protein format						CHEMBL2111450	S-adenosylmethionine synthetase (MAT 1 and MAT 2)	Rattus norvegicus	PROTEIN FAMILY	CHEMBL1123521	1	Scientific Literature	J. Med. Chem.	1986
CHEMBL4224853		0	359.72	0	3.51	169999	COc1ccc(OC2=C(Cl)C(=O)c3ccccc3C2=O)c([N+](=O)[O-])c1	IC50	'='	850	nM	6.07			UO_0000065	16.88	0.33	2.56	6.34	FALSE	CHEMBL4224573	Inhibition of recombinant human rhinovirus protease 3C using fluorogenic-Dabcyl-KTSAVLQSGFRKME-Edan as substrate after 5 mins by FRET assay	B	BAO_0000357	single protein format	Human rhinovirus sp.					CHEMBL4295564	Genome polyprotein	Human rhinovirus 14	SINGLE PROTEIN	CHEMBL4219266	1	Scientific Literature	Bioorg Med Chem Lett	2018
CHEMBL4212167		0	584.61	1	-0.08	12	Cc1cc(C(=O)N[C@H]2CNC(=O)C[C@H]3CCCN3C(=O)CC[C@@H](C=O)NC(=O)[C@H](Cc3ccc(F)cc3)NC2=O)no1	IC50	'='	2	nM	8.7			UO_0000065	14.88	0.28	8.78	4.84	FALSE	CHEMBL4188669	Inhibition of Human rhinovirus serotype 14 3C protease preincubated for 1 hr followed by Cys(PT14M)-Ala-Ile-Phe-Gln'Gly-Pro-Asp-Phe(4-NH2)-OH substrate addition measured after 1 hr by fluorescence lifetime readout assay	B	BAO_0000357	single protein format	Human rhinovirus 14					CHEMBL4295564	Genome polyprotein	Human rhinovirus 14	SINGLE PROTEIN	CHEMBL4184282	1	Scientific Literature	Bioorg Med Chem Lett	2018
CHEMBL4207200		0	599.66	1	1.97	8	CCOC(=O)/C=C/[C@@H]1CCC(=O)N(C)CCCC[C@H](NC(=O)c2cc(C)on2)C(=O)N[C@@H](Cc2ccc(F)cc2)C(=O)N1	IC50	'='	3840	nM	5.42			UO_0000065	9.03	0.17	3.45	3.39	FALSE	CHEMBL4188669	Inhibition of Human rhinovirus serotype 14 3C protease preincubated for 1 hr followed by Cys(PT14M)-Ala-Ile-Phe-Gln'Gly-Pro-Asp-Phe(4-NH2)-OH substrate addition measured after 1 hr by fluorescence lifetime readout assay	B	BAO_0000357	single protein format	Human rhinovirus 14					CHEMBL4295564	Genome polyprotein	Human rhinovirus 14	SINGLE PROTEIN	CHEMBL4184282	1	Scientific Literature	Bioorg Med Chem Lett	2018
CHEMBL4211003		0	529.57	1	1.05	4	Cc1cc(C(=O)N[C@H]2CCCCN(C)C(=O)CC[C@@H](C=O)NC(=O)[C@H](Cc3ccc(F)cc3)NC2=O)no1	IC50	'='	63	nM	7.2			UO_0000065	13.6	0.26	6.15	4.78	FALSE	CHEMBL4188669	Inhibition of Human rhinovirus serotype 14 3C protease preincubated for 1 hr followed by Cys(PT14M)-Ala-Ile-Phe-Gln'Gly-Pro-Asp-Phe(4-NH2)-OH substrate addition measured after 1 hr by fluorescence lifetime readout assay	B	BAO_0000357	single protein format	Human rhinovirus 14					CHEMBL4295564	Genome polyprotein	Human rhinovirus 14	SINGLE PROTEIN	CHEMBL4184282	1	Scientific Literature	Bioorg Med Chem Lett	2018
CHEMBL4215964		0	524.62	1	1.87	3	CC(=O)NCC(C=O)NC(=O)[C@H](Cc1ccccc1)NC(=O)[C@H](CC(C)C)NC(=O)OCc1ccccc1	IC50	'='	7	nM	8.15			UO_0000065	15.54	0.29	6.28	5.71	FALSE	CHEMBL4188669	Inhibition of Human rhinovirus serotype 14 3C protease preincubated for 1 hr followed by Cys(PT14M)-Ala-Ile-Phe-Gln'Gly-Pro-Asp-Phe(4-NH2)-OH substrate addition measured after 1 hr by fluorescence lifetime readout assay	B	BAO_0000357	single protein format	Human rhinovirus 14					CHEMBL4295564	Genome polyprotein	Human rhinovirus 14	SINGLE PROTEIN	CHEMBL4184282	1	Scientific Literature	Bioorg Med Chem Lett	2018
CHEMBL4216095		0	611.67	1	1.77	15	Cc1cc(C(=O)N[C@H]2C/C=C/CCCO[C@H]3CCN(C3)C(=O)CC[C@@H](C=O)NC(=O)[C@H](Cc3ccc(F)cc3)NC2=O)no1	IC50	'='	2	nM	8.7			UO_0000065	14.22	0.27	6.93	5.44	FALSE	CHEMBL4188669	Inhibition of Human rhinovirus serotype 14 3C protease preincubated for 1 hr followed by Cys(PT14M)-Ala-Ile-Phe-Gln'Gly-Pro-Asp-Phe(4-NH2)-OH substrate addition measured after 1 hr by fluorescence lifetime readout assay	B	BAO_0000357	single protein format	Human rhinovirus 14					CHEMBL4295564	Genome polyprotein	Human rhinovirus 14	SINGLE PROTEIN	CHEMBL4184282	1	Scientific Literature	Bioorg Med Chem Lett	2018
CHEMBL4203502		0	612.66	1	0.66	7	Cc1cc(C(=O)N[C@H]2CCCCN(C)C(=O)CC[C@@H](C(=O)C(=O)N3CCC3)NC(=O)[C@H](Cc3ccc(F)cc3)NC2=O)no1	IC50	'='	35	nM	7.46			UO_0000065	12.17	0.23	6.8	4.36	FALSE	CHEMBL4188669	Inhibition of Human rhinovirus serotype 14 3C protease preincubated for 1 hr followed by Cys(PT14M)-Ala-Ile-Phe-Gln'Gly-Pro-Asp-Phe(4-NH2)-OH substrate addition measured after 1 hr by fluorescence lifetime readout assay	B	BAO_0000357	single protein format	Human rhinovirus 14					CHEMBL4295564	Genome polyprotein	Human rhinovirus 14	SINGLE PROTEIN	CHEMBL4184282	1	Scientific Literature	Bioorg Med Chem Lett	2018
CHEMBL4218384		0	583.62	1	0.99	14	Cc1cc(C(=O)N[C@H]2C/C=C/CO[C@H]3CCN(C3)C(=O)CC[C@@H](C=O)NC(=O)[C@H](Cc3ccc(F)cc3)NC2=O)no1	IC50	'='	3	nM	8.52			UO_0000065	14.6	0.28	7.53	5.33	FALSE	CHEMBL4188669	Inhibition of Human rhinovirus serotype 14 3C protease preincubated for 1 hr followed by Cys(PT14M)-Ala-Ile-Phe-Gln'Gly-Pro-Asp-Phe(4-NH2)-OH substrate addition measured after 1 hr by fluorescence lifetime readout assay	B	BAO_0000357	single protein format	Human rhinovirus 14					CHEMBL4295564	Genome polyprotein	Human rhinovirus 14	SINGLE PROTEIN	CHEMBL4184282	1	Scientific Literature	Bioorg Med Chem Lett	2018
CHEMBL4202850		0	537.62	1	1.57	9	Cc1cc(C(=O)N[C@H]2CCCCN(C)C(=O)CC[C@@H](C=O)NC(=O)[C@@H]3C[C@@H](c4ccccc4)CN3C2=O)no1	IC50	'='	7370	nM	5.13			UO_0000065	9.55	0.18	3.56	3.62	FALSE	CHEMBL4188669	Inhibition of Human rhinovirus serotype 14 3C protease preincubated for 1 hr followed by Cys(PT14M)-Ala-Ile-Phe-Gln'Gly-Pro-Asp-Phe(4-NH2)-OH substrate addition measured after 1 hr by fluorescence lifetime readout assay	B	BAO_0000357	single protein format	Human rhinovirus 14					CHEMBL4295564	Genome polyprotein	Human rhinovirus 14	SINGLE PROTEIN	CHEMBL4184282	1	Scientific Literature	Bioorg Med Chem Lett	2018
CHEMBL4207862		0	570.58	1	-0.47	6	Cc1cc(C(=O)N[C@H]2CNC(=O)[C@H]3CCCN3C(=O)CC[C@@H](C=O)NC(=O)[C@H](Cc3ccc(F)cc3)NC2=O)no1	IC50	'='	6	nM	8.22			UO_0000065	14.41	0.27	8.69	4.57	FALSE	CHEMBL4188669	Inhibition of Human rhinovirus serotype 14 3C protease preincubated for 1 hr followed by Cys(PT14M)-Ala-Ile-Phe-Gln'Gly-Pro-Asp-Phe(4-NH2)-OH substrate addition measured after 1 hr by fluorescence lifetime readout assay	B	BAO_0000357	single protein format	Human rhinovirus 14					CHEMBL4295564	Genome polyprotein	Human rhinovirus 14	SINGLE PROTEIN	CHEMBL4184282	1	Scientific Literature	Bioorg Med Chem Lett	2018
CHEMBL4217566		0	544.54	1	-1	5	Cc1cc(C(=O)N[C@H]2CNC(=O)CN(C)C(=O)CC[C@@H](C=O)NC(=O)[C@H](Cc3ccc(F)cc3)NC2=O)no1	IC50	'='	18	nM	7.75			UO_0000065	14.22	0.27	8.74	4.31	FALSE	CHEMBL4188669	Inhibition of Human rhinovirus serotype 14 3C protease preincubated for 1 hr followed by Cys(PT14M)-Ala-Ile-Phe-Gln'Gly-Pro-Asp-Phe(4-NH2)-OH substrate addition measured after 1 hr by fluorescence lifetime readout assay	B	BAO_0000357	single protein format	Human rhinovirus 14					CHEMBL4295564	Genome polyprotein	Human rhinovirus 14	SINGLE PROTEIN	CHEMBL4184282	1	Scientific Literature	Bioorg Med Chem Lett	2018
CHEMBL4202932		0	598.63	1	0.17	13	Cc1cc(C(=O)N[C@H]2CCCNC(=O)[C@H]3CCN(C3)C(=O)CC[C@@H](C=O)NC(=O)[C@H](Cc3ccc(F)cc3)NC2=O)no1	IC50	'='	2	nM	8.7			UO_0000065	14.53	0.28	8.53	4.84	FALSE	CHEMBL4188669	Inhibition of Human rhinovirus serotype 14 3C protease preincubated for 1 hr followed by Cys(PT14M)-Ala-Ile-Phe-Gln'Gly-Pro-Asp-Phe(4-NH2)-OH substrate addition measured after 1 hr by fluorescence lifetime readout assay	B	BAO_0000357	single protein format	Human rhinovirus 14					CHEMBL4295564	Genome polyprotein	Human rhinovirus 14	SINGLE PROTEIN	CHEMBL4184282	1	Scientific Literature	Bioorg Med Chem Lett	2018
CHEMBL4212963		0	563.59	1	1.76	10	Cc1cc(C(=O)N[C@@H]2C(=O)N[C@@H](Cc3ccc(F)cc3)C(=O)N[C@H](C=O)CCC(=O)N(C)Cc3cccc2c3)no1	IC50	'='	8	nM	8.1			UO_0000065	14.37	0.27	6.34	5.37	FALSE	CHEMBL4188669	Inhibition of Human rhinovirus serotype 14 3C protease preincubated for 1 hr followed by Cys(PT14M)-Ala-Ile-Phe-Gln'Gly-Pro-Asp-Phe(4-NH2)-OH substrate addition measured after 1 hr by fluorescence lifetime readout assay	B	BAO_0000357	single protein format	Human rhinovirus 14					CHEMBL4295564	Genome polyprotein	Human rhinovirus 14	SINGLE PROTEIN	CHEMBL4184282	1	Scientific Literature	Bioorg Med Chem Lett	2018
CHEMBL4229177		0	323.69	0	2.94	77035	Cc1nc2c([nH]1)C(=O)C(Cl)=C(Nc1cc(F)cc(F)c1)C2=O	Inhibition						Active						FALSE	CHEMBL4224574	Inhibition of human rhinovirus protease 3C catalytic activity assessed as suppression of target protein cleavage at 50 uM after 30 mins by SDS-PAGE analysis	B	BAO_0000357	single protein format	Human rhinovirus sp.					CHEMBL4295564	Genome polyprotein	Human rhinovirus 14	SINGLE PROTEIN	CHEMBL4219266	1	Scientific Literature	Bioorg Med Chem Lett	2018
CHEMBL4207281		0	549.56	1	1.41	11	Cc1cc(C(=O)N[C@@H]2C(=O)N[C@@H](Cc3ccc(F)cc3)C(=O)N[C@H](C=O)CCC(=O)NCc3cccc2c3)no1	IC50	'='	753	nM	6.12			UO_0000065	11.14	0.21	4.71	3.84	FALSE	CHEMBL4188669	Inhibition of Human rhinovirus serotype 14 3C protease preincubated for 1 hr followed by Cys(PT14M)-Ala-Ile-Phe-Gln'Gly-Pro-Asp-Phe(4-NH2)-OH substrate addition measured after 1 hr by fluorescence lifetime readout assay	B	BAO_0000357	single protein format	Human rhinovirus 14					CHEMBL4295564	Genome polyprotein	Human rhinovirus 14	SINGLE PROTEIN	CHEMBL4184282	1	Scientific Literature	Bioorg Med Chem Lett	2018
CHEMBL4229177		0	323.69	0	2.94	77035	Cc1nc2c([nH]1)C(=O)C(Cl)=C(Nc1cc(F)cc(F)c1)C2=O	IC50	'='	8400	nM	5.08			UO_0000065	15.68	0.32	2.14	6.78	FALSE	CHEMBL4224573	Inhibition of recombinant human rhinovirus protease 3C using fluorogenic-Dabcyl-KTSAVLQSGFRKME-Edan as substrate after 5 mins by FRET assay	B	BAO_0000357	single protein format	Human rhinovirus sp.					CHEMBL4295564	Genome polyprotein	Human rhinovirus 14	SINGLE PROTEIN	CHEMBL4219266	1	Scientific Literature	Bioorg Med Chem Lett	2018
CHEMBL4206628		0	515.54	1	0.71	2	Cc1cc(C(=O)N[C@H]2CCCCNC(=O)CC[C@@H](C=O)NC(=O)[C@H](Cc3ccc(F)cc3)NC2=O)no1	IC50	'='	3200	nM	5.5			UO_0000065	10.66	0.2	4.78	3.45	FALSE	CHEMBL4188669	Inhibition of Human rhinovirus serotype 14 3C protease preincubated for 1 hr followed by Cys(PT14M)-Ala-Ile-Phe-Gln'Gly-Pro-Asp-Phe(4-NH2)-OH substrate addition measured after 1 hr by fluorescence lifetime readout assay	B	BAO_0000357	single protein format	Human rhinovirus 14					CHEMBL4295564	Genome polyprotein	Human rhinovirus 14	SINGLE PROTEIN	CHEMBL4184282	1	Scientific Literature	Bioorg Med Chem Lett	2018
CHEMBL4224853		0	359.72	0	3.51	169999	COc1ccc(OC2=C(Cl)C(=O)c3ccccc3C2=O)c([N+](=O)[O-])c1	Inhibition						Active						FALSE	CHEMBL4224575	Inhibition of human rhinovirus protease 3C catalytic activity assessed as suppression of target protein cleavage at 5 uM after 30 mins by SDS-PAGE analysis	B	BAO_0000357	single protein format	Human rhinovirus sp.					CHEMBL4295564	Genome polyprotein	Human rhinovirus 14	SINGLE PROTEIN	CHEMBL4219266	1	Scientific Literature	Bioorg Med Chem Lett	2018
CHEMBL2236416		0	477.18	1	5.13	Table 2, 3	N#Cc1c(-c2ccc(Br)cc2)nc(SCc2ccccc2Br)[nH]c1=O	IC50	'='	10000	nM	5			UO_0000065	10.48	0.27	-0.13	7.19	FALSE	CHEMBL3063097	Inhibition of Hepatitis C virus NS5B RNA-dependent RNA polymerase	B	BAO_0000357	single protein format	Hepatitis C virus					CHEMBL5375	Hepatitis C virus NS5B RNA-dependent RNA polymerase	Hepatitis C virus	SINGLE PROTEIN	CHEMBL3046041	1	Scientific Literature	Med Chem Res	2011
CHEMBL2236460		0	313.43	0	3.9	37	CCCCCSc1nc(-c2ccccc2C)c(C#N)c(=O)[nH]1	IC50	'='	18197	nM	4.74			UO_0000065	15.12	0.29	0.84	6.82	FALSE	CHEMBL3063097	Inhibition of Hepatitis C virus NS5B RNA-dependent RNA polymerase	B	BAO_0000357	single protein format	Hepatitis C virus					CHEMBL5375	Hepatitis C virus NS5B RNA-dependent RNA polymerase	Hepatitis C virus	SINGLE PROTEIN	CHEMBL3046041	1	Scientific Literature	Med Chem Res	2011
CHEMBL2236441		0	378.41	0	3.82	18	Cc1ccccc1-c1nc(SCc2cccc([N+](=O)[O-])c2)[nH]c(=O)c1C#N	IC50	'='	37000	nM	4.43			UO_0000065	11.71	0.22	0.61	3.93	FALSE	CHEMBL3063097	Inhibition of Hepatitis C virus NS5B RNA-dependent RNA polymerase	B	BAO_0000357	single protein format	Hepatitis C virus					CHEMBL5375	Hepatitis C virus NS5B RNA-dependent RNA polymerase	Hepatitis C virus	SINGLE PROTEIN	CHEMBL3046041	1	Scientific Literature	Med Chem Res	2011
CHEMBL2236440		0	347.44	0	4.22	17	Cc1cccc(CSc2nc(-c3ccccc3C)c(C#N)c(=O)[nH]2)c1	IC50	'='	14000	nM	4.85			UO_0000065	13.97	0.27	0.63	6.98	FALSE	CHEMBL3063097	Inhibition of Hepatitis C virus NS5B RNA-dependent RNA polymerase	B	BAO_0000357	single protein format	Hepatitis C virus					CHEMBL5375	Hepatitis C virus NS5B RNA-dependent RNA polymerase	Hepatitis C virus	SINGLE PROTEIN	CHEMBL3046041	1	Scientific Literature	Med Chem Res	2011
CHEMBL366941		0	470.57	1	5.55	3	COc1ccc(CNC(=O)c2ccc3c(c2)nc(-c2ccccn2)n3C2CCCCC2)cc1OC	IC50	'='	7100	nM	5.15			UO_0000065	10.94	0.2	-0.4	6.58	FALSE	CHEMBL750250	Inhibitory activity against NS5B polymerase of hepatitis C virus	B	BAO_0000357	single protein format	Hepatitis C virus					CHEMBL5375	Hepatitis C virus NS5B RNA-dependent RNA polymerase	Hepatitis C virus	SINGLE PROTEIN	CHEMBL1149223	1	Scientific Literature	Bioorg. Med. Chem. Lett.	2004
CHEMBL175685		0	293.33	0	3.52	11	O=C(O)c1ccc2c(c1)nc(-c1ccccn1)n2C1CCC1	IC50	'='	76000	nM	4.12			UO_0000065	14.04	0.26	0.6	6.06	FALSE	CHEMBL750250	Inhibitory activity against NS5B polymerase of hepatitis C virus	B	BAO_0000357	single protein format	Hepatitis C virus					CHEMBL5375	Hepatitis C virus NS5B RNA-dependent RNA polymerase	Hepatitis C virus	SINGLE PROTEIN	CHEMBL1149223	1	Scientific Literature	Bioorg. Med. Chem. Lett.	2004
CHEMBL176905		0	540.58	2	5.41	28	O=C(O)c1ccc2[nH]cc(C[C@H](NC(=O)c3ccc4c(c3)nc(-c3ccoc3)n4C3CCCCC3)C(=O)O)c2c1	IC50	'='	20	nM	7.7			UO_0000065	14.24	0.26	2.29	5.12	FALSE	CHEMBL750248	Concentration required for inhibiting hepatitis C virus NS5B RNA polymerase activity.	B	BAO_0000357	single protein format	Hepatitis C virus					CHEMBL5375	Hepatitis C virus NS5B RNA-dependent RNA polymerase	Hepatitis C virus	SINGLE PROTEIN	CHEMBL1149207	1	Scientific Literature	Bioorg. Med. Chem. Lett.	2004
CHEMBL192409		0	476.34	1	5.89	62 (table 3)	O=C(CCC1CCCC1)N/C(=C\c1ccc(Oc2ccc(F)cc2Br)cc1)C(=O)O	IC50	'='	15000	nM	4.82			UO_0000065	10.13	0.22	-1.07	6.38	FALSE	CHEMBL827995	Inhibitory concentration against RNA dependent RNA polymerase Nonstructural protein 5B (HCV NS5B polymerase) in Hepatitis C virus	B	BAO_0000357	single protein format	Hepatitis C virus					CHEMBL5375	Hepatitis C virus NS5B RNA-dependent RNA polymerase	Hepatitis C virus	SINGLE PROTEIN	CHEMBL1145278	1	Scientific Literature	Bioorg. Med. Chem. Lett.	2005
CHEMBL363165		0	415.49	1	5.63	72	CC(C)(C)c1ccccc1Oc1ccc(/C=C(\NC(=O)c2ccccc2)C(=O)O)cc1	IC50	'>'	100000	nM				UO_0000065					FALSE	CHEMBL832697	Inhibitory concentration against Hepatitis C virus NS5B polymerase	B	BAO_0000357	single protein format	Hepatitis C virus					CHEMBL5375	Hepatitis C virus NS5B RNA-dependent RNA polymerase	Hepatitis C virus	SINGLE PROTEIN	CHEMBL1140265	1	Scientific Literature	Bioorg. Med. Chem. Lett.	2005
CHEMBL365748		0	529.39	2	6.36	69 (table 4)	O=C(Nc1cccc(O)c1)/C(=C/c1ccc(Oc2ccccc2Br)cc1)NC(=O)c1ccccc1	ED50	'='	15	uM		Non standard unit for type		UO_0000064					FALSE	CHEMBL832552	Effective dose for RNA dependent RNA polymerase Nonstructural protein 5B (HCV NS5B polymerase) in Hepatitis C virus	B	BAO_0000357	single protein format	Hepatitis C virus					CHEMBL5375	Hepatitis C virus NS5B RNA-dependent RNA polymerase	Hepatitis C virus	SINGLE PROTEIN	CHEMBL1145278	1	Scientific Literature	Bioorg. Med. Chem. Lett.	2005
CHEMBL372277		0	527.42	2	6.33	66 (table 4)	O=C(NCc1ccccc1)/C(=C/c1ccc(Oc2ccccc2Br)cc1)NC(=O)c1ccccc1	ED50	'>'	50	uM		Non standard unit for type		UO_0000064					FALSE	CHEMBL832552	Effective dose for RNA dependent RNA polymerase Nonstructural protein 5B (HCV NS5B polymerase) in Hepatitis C virus	B	BAO_0000357	single protein format	Hepatitis C virus					CHEMBL5375	Hepatitis C virus NS5B RNA-dependent RNA polymerase	Hepatitis C virus	SINGLE PROTEIN	CHEMBL1145278	1	Scientific Literature	Bioorg. Med. Chem. Lett.	2005
CHEMBL380002		0	654.18	2	9.71	10m	CC(=O)N(c1ccc(-c2ccc(Cl)cc2)c(COc2ccc(-c3nc4cc(C(=O)O)ccc4n3C3CCCCC3)c(F)c2)c1)C(C)C	IC50	'='	21	nM	7.68			UO_0000065	11.74	0.22	-2.03	9.07	FALSE	CHEMBL866684	Inhibition of HCV 1b BK six His-tagged C-terminal truncated 544 amino acid NS5B RNA dependent RNA polymerase	B	BAO_0000357	single protein format	Hepatitis C virus subtype 1b					CHEMBL5375	Hepatitis C virus NS5B RNA-dependent RNA polymerase	Hepatitis C virus	SINGLE PROTEIN	CHEMBL1138950	1	Scientific Literature	J. Med. Chem.	2006
CHEMBL438430		0	580.08	2	7.91	3j	NC(=O)c1ccc(-c2ccc(Cl)cc2)c(COc2ccc(-c3nc4cc(C(=O)O)ccc4n3C3CCCCC3)cc2)c1	IC50	'='	13	nM	7.89			UO_0000065	13.59	0.26	-0.02	7.34	FALSE	CHEMBL866684	Inhibition of HCV 1b BK six His-tagged C-terminal truncated 544 amino acid NS5B RNA dependent RNA polymerase	B	BAO_0000357	single protein format	Hepatitis C virus subtype 1b					CHEMBL5375	Hepatitis C virus NS5B RNA-dependent RNA polymerase	Hepatitis C virus	SINGLE PROTEIN	CHEMBL1138950	1	Scientific Literature	J. Med. Chem.	2006
CHEMBL200696		0	329.42	0	4.12	32	CCC[C@@]1(CC(=O)O)OCCc2c1sc1c(C)ccc(C#N)c21	IC50	'='	2850	nM	5.54			UO_0000065	16.83	0.33	1.43	7.89	FALSE	CHEMBL864623	Displacement of [alpha-32P]GTP from recombinant HCV NS5B RNA dependent RNA polymerase	B	BAO_0000357	single protein format	Hepatitis C virus					CHEMBL5375	Hepatitis C virus NS5B RNA-dependent RNA polymerase	Hepatitis C virus	SINGLE PROTEIN	CHEMBL1148590	1	Scientific Literature	Bioorg. Med. Chem. Lett.	2006
CHEMBL198349		0	359.27	1	5.25	25	CCCC1(CC(=O)O)OCCc2c1sc1c(Cl)ccc(Cl)c21	IC50	'='	140	nM	6.85			UO_0000065	19.08	0.43	1.6	14.73	FALSE	CHEMBL864623	Displacement of [alpha-32P]GTP from recombinant HCV NS5B RNA dependent RNA polymerase	B	BAO_0000357	single protein format	Hepatitis C virus					CHEMBL5375	Hepatitis C virus NS5B RNA-dependent RNA polymerase	Hepatitis C virus	SINGLE PROTEIN	CHEMBL1148590	1	Scientific Literature	Bioorg. Med. Chem. Lett.	2006
CHEMBL210491		0	590.64	2	2.28	7	C=CCOC(=O)NS(=O)(=O)Nc1ccc2c(c1)S(=O)(=O)N=C(c1c(O)c3cccnc3n(CCC(C)C)c1=O)N2	IC50	'='	88	nM	7.06			UO_0000065	11.95	0.24	4.78	3.56	FALSE	CHEMBL865370	Inhibition of HCV 1a NS5B RNA polymerase	B	BAO_0000357	single protein format						CHEMBL5375	Hepatitis C virus NS5B RNA-dependent RNA polymerase	Hepatitis C virus	SINGLE PROTEIN	CHEMBL1138070	1	Scientific Literature	Bioorg. Med. Chem. Lett.	2006
CHEMBL377813		0	640.16	2	9.32	10k	CCN(C(C)=O)c1ccc(-c2ccc(Cl)cc2)c(COc2ccc(-c3nc4cc(C(=O)O)ccc4n3C3CCCCC3)c(F)c2)c1	IC50	'='	19	nM	7.72			UO_0000065	12.06	0.23	-1.6	9.12	FALSE	CHEMBL866684	Inhibition of HCV 1b BK six His-tagged C-terminal truncated 544 amino acid NS5B RNA dependent RNA polymerase	B	BAO_0000357	single protein format	Hepatitis C virus subtype 1b					CHEMBL5375	Hepatitis C virus NS5B RNA-dependent RNA polymerase	Hepatitis C virus	SINGLE PROTEIN	CHEMBL1138950	1	Scientific Literature	J. Med. Chem.	2006
CHEMBL185589		0	369.3	0	1.2	14	O=C(NS(=O)(=O)C(F)(F)F)c1nc(-c2cccs2)nc(O)c1O	IC50	'='	6200	nM	5.21			UO_0000065	14.1	0.31	4.01	4.02	FALSE	CHEMBL828388	inhibitory concentration against RNA dependent RNA polymerase Nonstructural protein 5B of hepatitis C virus	B	BAO_0000357	single protein format	Hepatitis C virus					CHEMBL5375	Hepatitis C virus NS5B RNA-dependent RNA polymerase	Hepatitis C virus	SINGLE PROTEIN	CHEMBL1137893	1	Scientific Literature	Bioorg. Med. Chem. Lett.	2004
CHEMBL190146		0	494.04	1	5.48	16	CN1CCN(C(=O)Cn2c(-c3ccc(Cl)cc3)c(C3CCCCC3)c3ccc(C(=O)O)cc32)CC1	IC50	'='	12	nM	7.92			UO_0000065	16.03	0.31	2.44	12.04	FALSE	CHEMBL830123	Inhibitory activity against by hepatitis C virus NS5B polymerase	B	BAO_0000357	single protein format	Hepatitis C virus					CHEMBL5375	Hepatitis C virus NS5B RNA-dependent RNA polymerase	Hepatitis C virus	SINGLE PROTEIN	CHEMBL1140313	1	Scientific Literature	J. Med. Chem.	2005
CHEMBL187010		0	252.25	0	1.4	10	COC(=O)c1nc(-c2cccs2)nc(O)c1O	Inhibition	'<'	30	%				UO_0000187					FALSE	CHEMBL834777	Percentage inhibition of RNA dependent RNA polymerase Nonstructural protein 5B of hepatitis C virus at 50 uM	B	BAO_0000357	single protein format	Hepatitis C virus					CHEMBL5375	Hepatitis C virus NS5B RNA-dependent RNA polymerase	Hepatitis C virus	SINGLE PROTEIN	CHEMBL1137893	1	Scientific Literature	Bioorg. Med. Chem. Lett.	2004
CHEMBL109969		0	276.24	0	1.76	10	O=C(O)c1oc(COCc2ccccc2)cc(=O)c1O	IC50	'>'	100000	nM				UO_0000065					FALSE	CHEMBL750253	Inhibitory potency against NS5B HCV polymerase	B	BAO_0000357	single protein format	Hepatitis C virus					CHEMBL5375	Hepatitis C virus NS5B RNA-dependent RNA polymerase	Hepatitis C virus	SINGLE PROTEIN	CHEMBL1146656	1	Scientific Literature	Bioorg. Med. Chem. Lett.	2004
CHEMBL208997		0	513.58	1	2.18	19	CC(C)CCn1c(=O)c(C2=NS(=O)(=O)c3cc(OCC(=O)N(C)C)ccc3N2)c(O)c2cccnc21	IC50	'='	70	nM	7.16			UO_0000065	13.93	0.27	4.97	5	FALSE	CHEMBL871397	Inhibition of HCV 1b NS5B RNA polymerase	B	BAO_0000357	single protein format	Hepatitis C virus subtype 1b					CHEMBL5375	Hepatitis C virus NS5B RNA-dependent RNA polymerase	Hepatitis C virus	SINGLE PROTEIN	CHEMBL1138030	1	Scientific Literature	Bioorg. Med. Chem. Lett.	2006
CHEMBL188442		0	438.28	1	5.1	2 (Page 2812)	O=C(O)/C(=C/c1ccc(Oc2ccccc2Br)cc1)NC(=O)c1ccccc1	ED50	'='	28	uM		Non standard unit for type		UO_0000064					FALSE	CHEMBL832552	Effective dose for RNA dependent RNA polymerase Nonstructural protein 5B (HCV NS5B polymerase) in Hepatitis C virus	B	BAO_0000357	single protein format	Hepatitis C virus					CHEMBL5375	Hepatitis C virus NS5B RNA-dependent RNA polymerase	Hepatitis C virus	SINGLE PROTEIN	CHEMBL1145278	1	Scientific Literature	Bioorg. Med. Chem. Lett.	2005
CHEMBL192222		0	470.29	1	5.16	41 (table 1)	O=C(Cc1ccc(F)cc1)N/C(=C\c1ccc(Oc2ccccc2Br)cc1)C(=O)O	ED50	'>'	100	uM		Non standard unit for type		UO_0000064					FALSE	CHEMBL832552	Effective dose for RNA dependent RNA polymerase Nonstructural protein 5B (HCV NS5B polymerase) in Hepatitis C virus	B	BAO_0000357	single protein format	Hepatitis C virus					CHEMBL5375	Hepatitis C virus NS5B RNA-dependent RNA polymerase	Hepatitis C virus	SINGLE PROTEIN	CHEMBL1145278	1	Scientific Literature	Bioorg. Med. Chem. Lett.	2005
CHEMBL192222		0	470.29	1	5.16	41 (table 1)	O=C(Cc1ccc(F)cc1)N/C(=C\c1ccc(Oc2ccccc2Br)cc1)C(=O)O	CC50	'>'	100000	nM				UO_0000065					FALSE	CHEMBL839075	Cytotoxic concentration against RNA dependent RNA polymerase Nonstructural protein 5B (HCV NS5B polymerase) in Hepatitis C virus	B	BAO_0000357	single protein format	Hepatitis C virus					CHEMBL5375	Hepatitis C virus NS5B RNA-dependent RNA polymerase	Hepatitis C virus	SINGLE PROTEIN	CHEMBL1145278	1	Scientific Literature	Bioorg. Med. Chem. Lett.	2005
CHEMBL190800		0	472.72	1	5.75	31 (table 1)	O=C(O)/C(=C/c1ccc(Oc2ccccc2Br)cc1)NC(=O)c1ccc(Cl)cc1	IC50	'='	110	nM	6.96			UO_0000065	14.72	0.33	1.21	9.2	FALSE	CHEMBL827995	Inhibitory concentration against RNA dependent RNA polymerase Nonstructural protein 5B (HCV NS5B polymerase) in Hepatitis C virus	B	BAO_0000357	single protein format	Hepatitis C virus					CHEMBL5375	Hepatitis C virus NS5B RNA-dependent RNA polymerase	Hepatitis C virus	SINGLE PROTEIN	CHEMBL1145278	1	Scientific Literature	Bioorg. Med. Chem. Lett.	2005
CHEMBL209633		0	518.6	1	4.29	16	CC(C)CCn1c(=O)c(C2=NS(=O)(=O)c3cc(OCc4ccccc4)ccc3N2)c(O)c2cccnc21	IC50	'='	1490	nM	5.83			UO_0000065	11.24	0.22	1.54	4.74	FALSE	CHEMBL871397	Inhibition of HCV 1b NS5B RNA polymerase	B	BAO_0000357	single protein format	Hepatitis C virus subtype 1b					CHEMBL5375	Hepatitis C virus NS5B RNA-dependent RNA polymerase	Hepatitis C virus	SINGLE PROTEIN	CHEMBL1138030	1	Scientific Literature	Bioorg. Med. Chem. Lett.	2006
CHEMBL213509		0	427.49	0	2.29	24	CC(C)CCn1c(=O)c(C2=NS(=O)(=O)c3cc(N)ccc3N2)c(O)c2cccnc21	IC50	'='	310	nM	6.51			UO_0000065	15.23	0.3	4.22	4.66	FALSE	CHEMBL871399	Inhibition of HCV 1a NS5B RNA polymerase	B	BAO_0000357	single protein format	Hepatitis C virus subtype 1a					CHEMBL5375	Hepatitis C virus NS5B RNA-dependent RNA polymerase	Hepatitis C virus	SINGLE PROTEIN	CHEMBL1138030	1	Scientific Literature	Bioorg. Med. Chem. Lett.	2006
CHEMBL195802		0	484.32	1	5.56	44 (table 1)	O=C(CCc1ccc(F)cc1)N/C(=C\c1ccc(Oc2ccccc2Br)cc1)C(=O)O	ED50	'>'	100	uM		Non standard unit for type		UO_0000064					FALSE	CHEMBL832552	Effective dose for RNA dependent RNA polymerase Nonstructural protein 5B (HCV NS5B polymerase) in Hepatitis C virus	B	BAO_0000357	single protein format	Hepatitis C virus					CHEMBL5375	Hepatitis C virus NS5B RNA-dependent RNA polymerase	Hepatitis C virus	SINGLE PROTEIN	CHEMBL1145278	1	Scientific Literature	Bioorg. Med. Chem. Lett.	2005
CHEMBL365105		0	517.17	2	5.86	32 (table 1)	O=C(O)/C(=C/c1ccc(Oc2ccccc2Br)cc1)NC(=O)c1ccc(Br)cc1	IC50	'='	120	nM	6.92			UO_0000065	13.38	0.33	1.06	9.15	FALSE	CHEMBL827995	Inhibitory concentration against RNA dependent RNA polymerase Nonstructural protein 5B (HCV NS5B polymerase) in Hepatitis C virus	B	BAO_0000357	single protein format	Hepatitis C virus					CHEMBL5375	Hepatitis C virus NS5B RNA-dependent RNA polymerase	Hepatitis C virus	SINGLE PROTEIN	CHEMBL1145278	1	Scientific Literature	Bioorg. Med. Chem. Lett.	2005
CHEMBL382997		0	626.67	1	3.18	23	CC(C)CCn1c(=O)c(C2=NS(=O)(=O)c3cc(NS(=O)(=O)Nc4cccc(C(=O)O)c4)ccc3N2)c(O)c2cccnc21	IC50	'='	115	nM	6.94			UO_0000065	11.07	0.22	3.76	3.32	FALSE	CHEMBL865370	Inhibition of HCV 1a NS5B RNA polymerase	B	BAO_0000357	single protein format						CHEMBL5375	Hepatitis C virus NS5B RNA-dependent RNA polymerase	Hepatitis C virus	SINGLE PROTEIN	CHEMBL1138070	1	Scientific Literature	Bioorg. Med. Chem. Lett.	2006
CHEMBL194227		0	480.36	1	5.72	45 (table 1)	Cc1ccc(CCC(=O)N/C(=C\c2ccc(Oc3ccccc3Br)cc2)C(=O)O)cc1	ED50	'>'	100	uM		Non standard unit for type		UO_0000064					FALSE	CHEMBL832552	Effective dose for RNA dependent RNA polymerase Nonstructural protein 5B (HCV NS5B polymerase) in Hepatitis C virus	B	BAO_0000357	single protein format	Hepatitis C virus					CHEMBL5375	Hepatitis C virus NS5B RNA-dependent RNA polymerase	Hepatitis C virus	SINGLE PROTEIN	CHEMBL1145278	1	Scientific Literature	Bioorg. Med. Chem. Lett.	2005
CHEMBL364684		0	520.3	2	6.04	40 (table 1)	O=C(Cc1ccc(C(F)(F)F)cc1)N/C(=C\c1ccc(Oc2ccccc2Br)cc1)C(=O)O	ED50	'>'	100	uM		Non standard unit for type		UO_0000064					FALSE	CHEMBL832552	Effective dose for RNA dependent RNA polymerase Nonstructural protein 5B (HCV NS5B polymerase) in Hepatitis C virus	B	BAO_0000357	single protein format	Hepatitis C virus					CHEMBL5375	Hepatitis C virus NS5B RNA-dependent RNA polymerase	Hepatitis C virus	SINGLE PROTEIN	CHEMBL1145278	1	Scientific Literature	Bioorg. Med. Chem. Lett.	2005
CHEMBL379718		0	684.75	2	3.31	14	CC(C)CCn1c(=O)c(C2=NS(=O)(=O)c3cc(NS(=O)(=O)NC(=O)OCCOCc4ccccc4)ccc3N2)c(O)c2cccnc21	IC50	'='	96	nM	7.02			UO_0000065	10.25	0.2	3.71	3.38	FALSE	CHEMBL865370	Inhibition of HCV 1a NS5B RNA polymerase	B	BAO_0000357	single protein format						CHEMBL5375	Hepatitis C virus NS5B RNA-dependent RNA polymerase	Hepatitis C virus	SINGLE PROTEIN	CHEMBL1138070	1	Scientific Literature	Bioorg. Med. Chem. Lett.	2006
CHEMBL192269		0	449.24	0	4.04	46 (table 2)	O=C(O)/C(=C/c1ccc(Oc2ccccc2I)cc1)NC(=O)C1CC1	CC50	'>'	100000000	nM		Outside typical range		UO_0000065					FALSE	CHEMBL839075	Cytotoxic concentration against RNA dependent RNA polymerase Nonstructural protein 5B (HCV NS5B polymerase) in Hepatitis C virus	B	BAO_0000357	single protein format	Hepatitis C virus					CHEMBL5375	Hepatitis C virus NS5B RNA-dependent RNA polymerase	Hepatitis C virus	SINGLE PROTEIN	CHEMBL1145278	1	Scientific Literature	Bioorg. Med. Chem. Lett.	2005
CHEMBL209006		0	654.73	2	3.63	44	CC(C)CCn1c(=O)c(C2=NS(=O)(=O)c3cc(NS(=O)(=O)N(C)C(=O)OCc4ccccc4)ccc3N2)c(O)c2cccnc21	IC50	'='	121	nM	6.92			UO_0000065	10.56	0.21	3.29	3.65	FALSE	CHEMBL865370	Inhibition of HCV 1a NS5B RNA polymerase	B	BAO_0000357	single protein format						CHEMBL5375	Hepatitis C virus NS5B RNA-dependent RNA polymerase	Hepatitis C virus	SINGLE PROTEIN	CHEMBL1138070	1	Scientific Literature	Bioorg. Med. Chem. Lett.	2006
CHEMBL212094		0	589.7	1	2.36	41	CC(C)CCn1c(=O)c(C2=NS(=O)(=O)c3cc(NS(=O)(=O)NN4CCCCC4)ccc3N2)c(O)c2cccnc21	IC50	'='	45	nM	7.35			UO_0000065	12.46	0.25	4.99	4.2	FALSE	CHEMBL865371	Inhibition of HCV 1b NS5B RNA polymerase	B	BAO_0000357	single protein format	Hepatitis C virus subtype 1b					CHEMBL5375	Hepatitis C virus NS5B RNA-dependent RNA polymerase	Hepatitis C virus	SINGLE PROTEIN	CHEMBL1138070	1	Scientific Literature	Bioorg. Med. Chem. Lett.	2006
CHEMBL212470		0	511.36	1	3.47	11	O=c1c(C2=NS(=O)(=O)c3cccc(Br)c3N2)c(O)c2cccnc2n1Cc1ccccc1	IC50	'='	6200	nM	5.21			UO_0000065	10.18	0.22	1.74	4.58	FALSE	CHEMBL871399	Inhibition of HCV 1a NS5B RNA polymerase	B	BAO_0000357	single protein format	Hepatitis C virus subtype 1a					CHEMBL5375	Hepatitis C virus NS5B RNA-dependent RNA polymerase	Hepatitis C virus	SINGLE PROTEIN	CHEMBL1138030	1	Scientific Literature	Bioorg. Med. Chem. Lett.	2006
CHEMBL210674		0	561.65	1	1.58	43	CC(C)CCn1c(=O)c(C2=NS(=O)(=O)c3cc(NS(=O)(=O)NN4CCC4)ccc3N2)c(O)c2cccnc21	IC50	'='	24	nM	7.62			UO_0000065	13.57	0.27	6.04	4.35	FALSE	CHEMBL865370	Inhibition of HCV 1a NS5B RNA polymerase	B	BAO_0000357	single protein format						CHEMBL5375	Hepatitis C virus NS5B RNA-dependent RNA polymerase	Hepatitis C virus	SINGLE PROTEIN	CHEMBL1138070	1	Scientific Literature	Bioorg. Med. Chem. Lett.	2006
CHEMBL213354		0	462.49	0	2.72	4	COc1ccc2c(c1)NC(c1c(O)c3cccnc3n(Cc3ccccc3)c1=O)=NS2(=O)=O	IC50	'='	3900	nM	5.41			UO_0000065	11.7	0.22	2.69	4.4	FALSE	CHEMBL871397	Inhibition of HCV 1b NS5B RNA polymerase	B	BAO_0000357	single protein format	Hepatitis C virus subtype 1b					CHEMBL5375	Hepatitis C virus NS5B RNA-dependent RNA polymerase	Hepatitis C virus	SINGLE PROTEIN	CHEMBL1138030	1	Scientific Literature	Bioorg. Med. Chem. Lett.	2006
CHEMBL379826		0	484.54	0	1.61	26	CC(C)CCn1c(=O)c(C2=NS(=O)(=O)c3cc(NCC(N)=O)ccc3N2)c(O)c2cccnc21	IC50	'='	470	nM	6.33			UO_0000065	13.06	0.25	4.72	3.75	FALSE	CHEMBL871399	Inhibition of HCV 1a NS5B RNA polymerase	B	BAO_0000357	single protein format	Hepatitis C virus subtype 1a					CHEMBL5375	Hepatitis C virus NS5B RNA-dependent RNA polymerase	Hepatitis C virus	SINGLE PROTEIN	CHEMBL1138030	1	Scientific Literature	Bioorg. Med. Chem. Lett.	2006
CHEMBL379613		0	504.55	1	0.79	48	NS(=O)(=O)Nc1ccc2c(c1)S(=O)(=O)NC(c1c(O)c3ccccc3n(NC3CCC3)c1=O)=N2	IC50	'='	5.2	nM	8.28			UO_0000065	16.42	0.33	7.49	4.48	FALSE	CHEMBL865370	Inhibition of HCV 1a NS5B RNA polymerase	B	BAO_0000357	single protein format						CHEMBL5375	Hepatitis C virus NS5B RNA-dependent RNA polymerase	Hepatitis C virus	SINGLE PROTEIN	CHEMBL1138070	1	Scientific Literature	Bioorg. Med. Chem. Lett.	2006
CHEMBL211709		0	448.46	0	2.42	6	O=c1c(C2=NS(=O)(=O)c3cccc(O)c3N2)c(O)c2cccnc2n1Cc1ccccc1	IC50	'='	8370	nM	5.08			UO_0000065	11.32	0.22	2.66	3.79	FALSE	CHEMBL871399	Inhibition of HCV 1a NS5B RNA polymerase	B	BAO_0000357	single protein format	Hepatitis C virus subtype 1a					CHEMBL5375	Hepatitis C virus NS5B RNA-dependent RNA polymerase	Hepatitis C virus	SINGLE PROTEIN	CHEMBL1138030	1	Scientific Literature	Bioorg. Med. Chem. Lett.	2006
CHEMBL192112		0	462.47	1	5.59	63 (table 3)	Nc1ccc(Oc2ccc(/C=C(\NC(=O)CCC3CCCC3)C(=O)O)cc2)c(C(F)(F)F)c1	CC50	'>'	50000	nM				UO_0000065					FALSE	CHEMBL839075	Cytotoxic concentration against RNA dependent RNA polymerase Nonstructural protein 5B (HCV NS5B polymerase) in Hepatitis C virus	B	BAO_0000357	single protein format	Hepatitis C virus					CHEMBL5375	Hepatitis C virus NS5B RNA-dependent RNA polymerase	Hepatitis C virus	SINGLE PROTEIN	CHEMBL1145278	1	Scientific Literature	Bioorg. Med. Chem. Lett.	2005
CHEMBL371388		0	351.33	0	3.94	45	O=C(O)/C(=C/c1ccc(-c2ccc(F)cc2)o1)NC(=O)c1ccccc1	IC50	'='	12000	nM	4.92			UO_0000065	14.01	0.26	0.98	6.19	FALSE	CHEMBL832697	Inhibitory concentration against Hepatitis C virus NS5B polymerase	B	BAO_0000357	single protein format	Hepatitis C virus					CHEMBL5375	Hepatitis C virus NS5B RNA-dependent RNA polymerase	Hepatitis C virus	SINGLE PROTEIN	CHEMBL1140265	1	Scientific Literature	Bioorg. Med. Chem. Lett.	2005
CHEMBL371345		0	495.33	0	4.21	65 (table 4)	O=C(O)CNC(=O)/C(=C/c1ccc(Oc2ccccc2Br)cc1)NC(=O)c1ccccc1	ED50	'>'	50	uM		Non standard unit for type		UO_0000064					FALSE	CHEMBL832552	Effective dose for RNA dependent RNA polymerase Nonstructural protein 5B (HCV NS5B polymerase) in Hepatitis C virus	B	BAO_0000357	single protein format	Hepatitis C virus					CHEMBL5375	Hepatitis C virus NS5B RNA-dependent RNA polymerase	Hepatitis C virus	SINGLE PROTEIN	CHEMBL1145278	1	Scientific Literature	Bioorg. Med. Chem. Lett.	2005
CHEMBL194116		0	417.34	0	4.7	39	O=C(O)/C(=C/c1ccc(-c2ccccc2OC(F)(F)F)o1)NC(=O)c1ccccc1	IC50	'='	4000	nM	5.4			UO_0000065	12.93	0.25	0.7	6.08	FALSE	CHEMBL832697	Inhibitory concentration against Hepatitis C virus NS5B polymerase	B	BAO_0000357	single protein format	Hepatitis C virus					CHEMBL5375	Hepatitis C virus NS5B RNA-dependent RNA polymerase	Hepatitis C virus	SINGLE PROTEIN	CHEMBL1140265	1	Scientific Literature	Bioorg. Med. Chem. Lett.	2005
CHEMBL178784		0	335.4	1	5.29	6	O=C(O)c1ccc2c(C3CCCCC3)c(-c3ccc(O)cc3)[nH]c2c1	IC50	'='	4.8	nM	8.32			UO_0000065	24.8	0.45	3.03	11.35	FALSE	CHEMBL828247	Inhibitory concentration against RNA dependent RNA polymerase nonstructural protein 5B of hepatitis C virus	B	BAO_0000357	single protein format	Hepatitis C virus					CHEMBL5375	Hepatitis C virus NS5B RNA-dependent RNA polymerase	Hepatitis C virus	SINGLE PROTEIN	CHEMBL1142688	1	Scientific Literature	J. Med. Chem.	2005
CHEMBL359645		0	460.52	0	3.32	4g	Cc1ccc(CNn2c(=O)c(C3=NS(=O)(=O)c4ccccc4N3)c(O)c3ccccc32)cc1	IC50	'>'	5000	nM				UO_0000065					FALSE	CHEMBL832929	Inhibitory concentration against RNA dependent RNA polymerase Nonstructural protein 5B of genotype 1b Hepatitis C virus	B	BAO_0000357	single protein format	Hepatitis C virus					CHEMBL5375	Hepatitis C virus NS5B RNA-dependent RNA polymerase	Hepatitis C virus	SINGLE PROTEIN	CHEMBL1142034	1	Scientific Literature	Bioorg. Med. Chem. Lett.	2005
CHEMBL1957270		0	438.51	0	3.14	5p	O=c1c(C2=NS(=O)(=O)c3ccccc3N2)c(O)c2ccccc2n1NC1CCCCC1	EC50	'='	1270	nM	5.9			UO_0000065	13.45	0.26	2.76	5.23	FALSE	CHEMBL839779	Effective concentration against RNA dependent RNA polymerase Nonstructural protein 5B of genotype 1b Hepatitis C virus	B	BAO_0000357	single protein format	Hepatitis C virus					CHEMBL5375	Hepatitis C virus NS5B RNA-dependent RNA polymerase	Hepatitis C virus	SINGLE PROTEIN	CHEMBL1142034	1	Scientific Literature	Bioorg. Med. Chem. Lett.	2005
CHEMBL361221		0	426.5	0	3	5b	CCCCCNn1c(=O)c(C2=NS(=O)(=O)c3ccccc3N2)c(O)c2ccccc21	IC50	'='	928	nM	6.03			UO_0000065	14.14	0.27	3.03	5.35	FALSE	CHEMBL832928	Inhibitory concentration against RNA dependent RNA polymerase Nonstructural protein 5B of genotype 1a Hepatitis C virus	B	BAO_0000357	single protein format	Hepatitis C virus					CHEMBL5375	Hepatitis C virus NS5B RNA-dependent RNA polymerase	Hepatitis C virus	SINGLE PROTEIN	CHEMBL1142034	1	Scientific Literature	Bioorg. Med. Chem. Lett.	2005
CHEMBL425693		0	333.43	1	5.59	8	Cn1c(-c2ccccc2)c(C2CCCCC2)c2ccc(C(=O)O)cc21	IC50	'='	28	nM	7.55			UO_0000065	22.65	0.41	1.96	17.89	FALSE	CHEMBL829597	Inhibitory activity against RNA dependent RNA polymerase nonstructural protein 5B in hepatitis C virus; n=1	B	BAO_0000357	single protein format	Hepatitis C virus					CHEMBL5375	Hepatitis C virus NS5B RNA-dependent RNA polymerase	Hepatitis C virus	SINGLE PROTEIN	CHEMBL1142688	1	Scientific Literature	J. Med. Chem.	2005
CHEMBL368647		0	432.56	1	5.39	12	O=C(O)c1ccc2c(C3CCCCC3)c(-c3ccccc3)n(CCN3CCOCC3)c2c1	EC50	'='	4.6	nM	8.34			UO_0000065	19.27	0.36	2.95	15.24	FALSE	CHEMBL877122	Effective concentration for inhibitory activity against RNA dependent RNA polymerase nonstructural protein 5B of hepatitis C virus; n=1	B	BAO_0000357	single protein format	Hepatitis C virus					CHEMBL5375	Hepatitis C virus NS5B RNA-dependent RNA polymerase	Hepatitis C virus	SINGLE PROTEIN	CHEMBL1142688	1	Scientific Literature	J. Med. Chem.	2005
CHEMBL361156		0	422.5	1	5.28	18	CN(C)C(=O)Cn1c(-c2cccc(F)c2)c(C2CCCCC2)c2ccc(C(=O)O)cc21	IC50	'='	18	nM	7.75			UO_0000065	18.33	0.34	2.46	12.38	FALSE	CHEMBL829597	Inhibitory activity against RNA dependent RNA polymerase nonstructural protein 5B in hepatitis C virus; n=1	B	BAO_0000357	single protein format	Hepatitis C virus					CHEMBL5375	Hepatitis C virus NS5B RNA-dependent RNA polymerase	Hepatitis C virus	SINGLE PROTEIN	CHEMBL1142688	1	Scientific Literature	J. Med. Chem.	2005
CHEMBL369320		0	409.53	1	7.1	9	O=C(O)c1ccc2c(C3CCCCC3)c(-c3ccccc3)n(Cc3ccccc3)c2c1	IC50	'='	37	nM	7.43			UO_0000065	18.15	0.33	0.33	17.6	FALSE	CHEMBL829597	Inhibitory activity against RNA dependent RNA polymerase nonstructural protein 5B in hepatitis C virus; n=1	B	BAO_0000357	single protein format	Hepatitis C virus					CHEMBL5375	Hepatitis C virus NS5B RNA-dependent RNA polymerase	Hepatitis C virus	SINGLE PROTEIN	CHEMBL1142688	1	Scientific Literature	J. Med. Chem.	2005
CHEMBL365793		0	475.59	0	4.6	4	CN(C)C(=O)CN(C)C(=O)Cn1c(-c2ccccc2)c(C2CCCCC2)c2ccc(C(=O)O)cc21	IC50	'='	98	nM	7.01			UO_0000065	14.74	0.27	2.41	8.46	FALSE	CHEMBL830123	Inhibitory activity against by hepatitis C virus NS5B polymerase	B	BAO_0000357	single protein format	Hepatitis C virus					CHEMBL5375	Hepatitis C virus NS5B RNA-dependent RNA polymerase	Hepatitis C virus	SINGLE PROTEIN	CHEMBL1140313	1	Scientific Literature	J. Med. Chem.	2005
CHEMBL372235		0	494.61	0	4.31	5	O=C(O)c1ccc2c(C3CCCCC3)c(-c3ccccc3)n(CC(=O)N3CCS(=O)(=O)CC3)c2c1	IC50	'='	43	nM	7.37			UO_0000065	14.89	0.29	3.06	7.62	FALSE	CHEMBL830123	Inhibitory activity against by hepatitis C virus NS5B polymerase	B	BAO_0000357	single protein format	Hepatitis C virus					CHEMBL5375	Hepatitis C virus NS5B RNA-dependent RNA polymerase	Hepatitis C virus	SINGLE PROTEIN	CHEMBL1140313	1	Scientific Literature	J. Med. Chem.	2005
CHEMBL189054		0	501.67	2	5.85	9	CN1CCCC(CN(C)C(=O)Cn2c(-c3ccccc3)c(C3CCCCC3)c3ccc(C(=O)O)cc32)C1	IC50	'='	18	nM	7.75			UO_0000065	15.44	0.29	1.89	11.77	FALSE	CHEMBL830123	Inhibitory activity against by hepatitis C virus NS5B polymerase	B	BAO_0000357	single protein format	Hepatitis C virus					CHEMBL5375	Hepatitis C virus NS5B RNA-dependent RNA polymerase	Hepatitis C virus	SINGLE PROTEIN	CHEMBL1140313	1	Scientific Literature	J. Med. Chem.	2005
CHEMBL366051		0	252.25	0	0.91	24	Cn1c(-c2cccs2)nc(C(=O)O)c(O)c1=O	IC50	'='	4200	nM	5.38			UO_0000065	21.32	0.43	4.47	5.82	TRUE	CHEMBL828388	inhibitory concentration against RNA dependent RNA polymerase Nonstructural protein 5B of hepatitis C virus	B	BAO_0000357	single protein format	Hepatitis C virus					CHEMBL5375	Hepatitis C virus NS5B RNA-dependent RNA polymerase	Hepatitis C virus	SINGLE PROTEIN	CHEMBL1137893	1	Scientific Literature	Bioorg. Med. Chem. Lett.	2004
CHEMBL195211		0	439.21	0	2.62	54 (table 2)	O=C(CO)N/C(=C\c1ccc(Oc2ccccc2I)cc1)C(=O)O	ED50	'>'	100	uM		Non standard unit for type		UO_0000064					FALSE	CHEMBL832552	Effective dose for RNA dependent RNA polymerase Nonstructural protein 5B (HCV NS5B polymerase) in Hepatitis C virus	B	BAO_0000357	single protein format	Hepatitis C virus					CHEMBL5375	Hepatitis C virus NS5B RNA-dependent RNA polymerase	Hepatitis C virus	SINGLE PROTEIN	CHEMBL1145278	1	Scientific Literature	Bioorg. Med. Chem. Lett.	2005
CHEMBL369640		0	281.31	0	3.38	13	CC(C)n1c(-c2ccccn2)nc2cc(C(=O)O)ccc21	IC50	'='	408000	nM		Outside typical range		UO_0000065					FALSE	CHEMBL750250	Inhibitory activity against NS5B polymerase of hepatitis C virus	B	BAO_0000357	single protein format	Hepatitis C virus					CHEMBL5375	Hepatitis C virus NS5B RNA-dependent RNA polymerase	Hepatitis C virus	SINGLE PROTEIN	CHEMBL1149223	1	Scientific Literature	Bioorg. Med. Chem. Lett.	2004
CHEMBL361434		0	320.39	0	4.91	19	O=C(O)c1ccc2c(c1)nc(-c1ccccc1)n2C1CCCCC1	IC50	'='	8600	nM	5.07			UO_0000065	15.81	0.29	0.16	9.19	FALSE	CHEMBL750250	Inhibitory activity against NS5B polymerase of hepatitis C virus	B	BAO_0000357	single protein format	Hepatitis C virus					CHEMBL5375	Hepatitis C virus NS5B RNA-dependent RNA polymerase	Hepatitis C virus	SINGLE PROTEIN	CHEMBL1149223	1	Scientific Literature	Bioorg. Med. Chem. Lett.	2004
CHEMBL177851		0	324.38	0	3.94	pg 123	Cc1[nH]cnc1-c1nc2cc(C(=O)O)ccc2n1C1CCCCC1	IC50	'>'	30000	nM				UO_0000065					FALSE	CHEMBL750250	Inhibitory activity against NS5B polymerase of hepatitis C virus	B	BAO_0000357	single protein format	Hepatitis C virus					CHEMBL5375	Hepatitis C virus NS5B RNA-dependent RNA polymerase	Hepatitis C virus	SINGLE PROTEIN	CHEMBL1149223	1	Scientific Literature	Bioorg. Med. Chem. Lett.	2004
CHEMBL191820		0	496.4	1	6	49 (table 2)	O=C(O)/C(=C/c1ccc(Oc2ccccc2Br)cc1)NC(=O)C12CC3CC(CC(C3)C1)C2	CC50	'>'	100000000	nM		Outside typical range		UO_0000065					FALSE	CHEMBL839075	Cytotoxic concentration against RNA dependent RNA polymerase Nonstructural protein 5B (HCV NS5B polymerase) in Hepatitis C virus	B	BAO_0000357	single protein format	Hepatitis C virus					CHEMBL5375	Hepatitis C virus NS5B RNA-dependent RNA polymerase	Hepatitis C virus	SINGLE PROTEIN	CHEMBL1145278	1	Scientific Literature	Bioorg. Med. Chem. Lett.	2005
CHEMBL205029		0	413.48	1	5.49	16g	O=C(O)c1ccc2c(c1)nc(-c1ccc(OCc3ccncc3)cc1)n2C1CCCC1	IC50	'='	4200	nM	5.38			UO_0000065	13	0.24	-0.11	6.96	FALSE	CHEMBL860683	Inhibitory activity against HCV 1b NS5B RNA dependent RNA polymerase	B	BAO_0000357	single protein format	Hepatitis C virus subtype 1b					CHEMBL5375	Hepatitis C virus NS5B RNA-dependent RNA polymerase	Hepatitis C virus	SINGLE PROTEIN	CHEMBL1146135	1	Scientific Literature	Bioorg. Med. Chem. Lett.	2006
CHEMBL2236454		0	416.33	1	5.34	31	N#Cc1c(-c2ccc(Cl)cc2Cl)nc(SCCCc2ccccc2)[nH]c1=O	IC50	'='	12022.6	nM	4.92			UO_0000065	11.82	0.25	-0.42	7.08	FALSE	CHEMBL3063097	Inhibition of Hepatitis C virus NS5B RNA-dependent RNA polymerase	B	BAO_0000357	single protein format	Hepatitis C virus					CHEMBL5375	Hepatitis C virus NS5B RNA-dependent RNA polymerase	Hepatitis C virus	SINGLE PROTEIN	CHEMBL3046041	1	Scientific Literature	Med Chem Res	2011
CHEMBL2236422		0	406.47	0	4.63	Table 2, 9	CC(C)c1ccc(-c2nc(SCc3cccc([N+](=O)[O-])c3)[nH]c(=O)c2C#N)cc1	IC50	'='	10000	nM	5			UO_0000065	12.3	0.24	0.37	4.44	FALSE	CHEMBL3063097	Inhibition of Hepatitis C virus NS5B RNA-dependent RNA polymerase	B	BAO_0000357	single protein format	Hepatitis C virus					CHEMBL5375	Hepatitis C virus NS5B RNA-dependent RNA polymerase	Hepatitis C virus	SINGLE PROTEIN	CHEMBL3046041	1	Scientific Literature	Med Chem Res	2011
CHEMBL2236450		0	440.37	1	5.49	27	CC(C)c1ccc(-c2nc(SCc3ccccc3Br)[nH]c(=O)c2C#N)cc1	IC50	'='	3801.89	nM	5.42			UO_0000065	12.31	0.27	-0.07	7.79	FALSE	CHEMBL3063097	Inhibition of Hepatitis C virus NS5B RNA-dependent RNA polymerase	B	BAO_0000357	single protein format	Hepatitis C virus					CHEMBL5375	Hepatitis C virus NS5B RNA-dependent RNA polymerase	Hepatitis C virus	SINGLE PROTEIN	CHEMBL3046041	1	Scientific Literature	Med Chem Res	2011
CHEMBL2236431		0	443.28	0	4.27	8	N#Cc1c(-c2ccc(Br)cc2)nc(SCc2cccc([N+](=O)[O-])c2)[nH]c1=O	IC50	'='	14125.4	nM	4.85			UO_0000065	10.94	0.25	0.58	4.3	FALSE	CHEMBL3063097	Inhibition of Hepatitis C virus NS5B RNA-dependent RNA polymerase	B	BAO_0000357	single protein format	Hepatitis C virus					CHEMBL5375	Hepatitis C virus NS5B RNA-dependent RNA polymerase	Hepatitis C virus	SINGLE PROTEIN	CHEMBL3046041	1	Scientific Literature	Med Chem Res	2011
CHEMBL2236425		0	369.4	0	4.19	2	Cc1cccc(CSc2nc(-c3ccc(F)cc3F)c(C#N)c(=O)[nH]2)c1	IC50	'='	57000	nM	4.24			UO_0000065	11.49	0.22	0.05	6.1	FALSE	CHEMBL3063097	Inhibition of Hepatitis C virus NS5B RNA-dependent RNA polymerase	B	BAO_0000357	single protein format	Hepatitis C virus					CHEMBL5375	Hepatitis C virus NS5B RNA-dependent RNA polymerase	Hepatitis C virus	SINGLE PROTEIN	CHEMBL3046041	1	Scientific Literature	Med Chem Res	2011
CHEMBL174225		0	473.53	0	4.93	12	O=C(N[C@@H](Cc1ccc(O)cc1)C(=O)O)c1ccc2c(c1)nc(-c1ccoc1)n2C1CCCCC1	IC50	'='	400	nM	6.4			UO_0000065	13.51	0.25	1.47	5.44	FALSE	CHEMBL750248	Concentration required for inhibiting hepatitis C virus NS5B RNA polymerase activity.	B	BAO_0000357	single protein format	Hepatitis C virus					CHEMBL5375	Hepatitis C virus NS5B RNA-dependent RNA polymerase	Hepatitis C virus	SINGLE PROTEIN	CHEMBL1149207	1	Scientific Literature	Bioorg. Med. Chem. Lett.	2004
CHEMBL366842		0	541.56	2	5.62	19	O=C(N[C@@H](Cc1c[nH]c2ccc([N+](=O)[O-])cc12)C(=O)O)c1ccc2c(c1)nc(-c1ccoc1)n2C1CCCCC1	IC50	'='	2000	nM	5.7			UO_0000065	10.52	0.19	0.08	3.65	FALSE	CHEMBL750248	Concentration required for inhibiting hepatitis C virus NS5B RNA polymerase activity.	B	BAO_0000357	single protein format	Hepatitis C virus					CHEMBL5375	Hepatitis C virus NS5B RNA-dependent RNA polymerase	Hepatitis C virus	SINGLE PROTEIN	CHEMBL1149207	1	Scientific Literature	Bioorg. Med. Chem. Lett.	2004
CHEMBL370911		0	475.59	0	4.6	20	CN(C)C(=O)CN(C)C(=O)Cn1c(-c2ccccc2)c(C2CCCCC2)c2cc(C(=O)O)ccc21	IC50						Not Determined						FALSE	CHEMBL833530	Inhibitory activity against by hepatitis C virus NS5B polymerase; ND=Not determined	B	BAO_0000357	single protein format	Hepatitis C virus					CHEMBL5375	Hepatitis C virus NS5B RNA-dependent RNA polymerase	Hepatitis C virus	SINGLE PROTEIN	CHEMBL1140313	1	Scientific Literature	J. Med. Chem.	2005
CHEMBL182020		0	336.3	0	3.74	4e	Oc1ncnc2nc(-c3ccc(F)cc3)c(-c3ccc(F)cc3)nc12	IC50	'='	500	nM	6.3			UO_0000065	18.74	0.34	2.56	8.78	FALSE	CHEMBL832944	Inhibitory concentration against RNA dependent RNA polymerase Nonstructural protein 5B of hepatitis C virus	B	BAO_0000357	single protein format	Hepatitis C virus					CHEMBL5375	Hepatitis C virus NS5B RNA-dependent RNA polymerase	Hepatitis C virus	SINGLE PROTEIN	CHEMBL1144286	1	Scientific Literature	Bioorg. Med. Chem. Lett.	2005
CHEMBL426244		0	469.5	1	5.7	6ep	COc1ccccc1CCNc1ncnc2nc(-c3ccc(F)cc3)c(-c3ccc(F)cc3)nc12	IC50	'='	80000	nM	4.1			UO_0000065	8.73	0.16	-1.6	5.63	FALSE	CHEMBL832944	Inhibitory concentration against RNA dependent RNA polymerase Nonstructural protein 5B of hepatitis C virus	B	BAO_0000357	single protein format	Hepatitis C virus					CHEMBL5375	Hepatitis C virus NS5B RNA-dependent RNA polymerase	Hepatitis C virus	SINGLE PROTEIN	CHEMBL1144286	1	Scientific Literature	Bioorg. Med. Chem. Lett.	2005
CHEMBL193333		0	513.39	2	6.65	67 (table 4)	O=C(Nc1ccccc1)/C(=C/c1ccc(Oc2ccccc2Br)cc1)NC(=O)c1ccccc1	CC50	'>'	50000	nM				UO_0000065					FALSE	CHEMBL839075	Cytotoxic concentration against RNA dependent RNA polymerase Nonstructural protein 5B (HCV NS5B polymerase) in Hepatitis C virus	B	BAO_0000357	single protein format	Hepatitis C virus					CHEMBL5375	Hepatitis C virus NS5B RNA-dependent RNA polymerase	Hepatitis C virus	SINGLE PROTEIN	CHEMBL1145278	1	Scientific Literature	Bioorg. Med. Chem. Lett.	2005
CHEMBL194554		0	437.29	0	4.5	25 (table 4)	NC(=O)/C(=C/c1ccc(Oc2ccccc2Br)cc1)NC(=O)c1ccccc1	ED50	'='	20	uM		Non standard unit for type		UO_0000064					FALSE	CHEMBL832552	Effective dose for RNA dependent RNA polymerase Nonstructural protein 5B (HCV NS5B polymerase) in Hepatitis C virus	B	BAO_0000357	single protein format	Hepatitis C virus					CHEMBL5375	Hepatitis C virus NS5B RNA-dependent RNA polymerase	Hepatitis C virus	SINGLE PROTEIN	CHEMBL1145278	1	Scientific Literature	Bioorg. Med. Chem. Lett.	2005
CHEMBL370081		0	387.44	0	4.9	64	CCc1ccccc1Oc1ccc(/C=C(\NC(=O)c2ccccc2)C(=O)O)cc1	IC50	'='	9400	nM	5.03			UO_0000065	12.97	0.24	0.13	6.65	FALSE	CHEMBL832697	Inhibitory concentration against Hepatitis C virus NS5B polymerase	B	BAO_0000357	single protein format	Hepatitis C virus					CHEMBL5375	Hepatitis C virus NS5B RNA-dependent RNA polymerase	Hepatitis C virus	SINGLE PROTEIN	CHEMBL1140265	1	Scientific Literature	Bioorg. Med. Chem. Lett.	2005
CHEMBL365127		0	384.84	0	4.32	16	O=C(O)/C(=C/c1ncc(-c2ccccc2Cl)s1)NC(=O)c1ccccc1	IC50	'='	5200	nM	5.28			UO_0000065	13.73	0.28	0.96	6.66	FALSE	CHEMBL832697	Inhibitory concentration against Hepatitis C virus NS5B polymerase	B	BAO_0000357	single protein format	Hepatitis C virus					CHEMBL5375	Hepatitis C virus NS5B RNA-dependent RNA polymerase	Hepatitis C virus	SINGLE PROTEIN	CHEMBL1140265	1	Scientific Literature	Bioorg. Med. Chem. Lett.	2005
CHEMBL360256		0	448.46	0	2.29	3a	O=c1c(C2=NS(=O)(=O)c3ccccc3N2)c(O)c2cccnc2n1OCc1ccccc1	IC50	'='	58000	nM	4.24			UO_0000065	9.45	0.18	1.95	3.45	FALSE	CHEMBL832929	Inhibitory concentration against RNA dependent RNA polymerase Nonstructural protein 5B of genotype 1b Hepatitis C virus	B	BAO_0000357	single protein format	Hepatitis C virus					CHEMBL5375	Hepatitis C virus NS5B RNA-dependent RNA polymerase	Hepatitis C virus	SINGLE PROTEIN	CHEMBL1142034	1	Scientific Literature	Bioorg. Med. Chem. Lett.	2005
CHEMBL182233		0	415.4	1	5.24	6en	Fc1ccc(-c2nc3ncnc(NCc4ccco4)c3nc2-c2ccc(F)cc2)cc1	IC50	'='	2900	nM	5.54			UO_0000065	13.33	0.24	0.3	7.22	FALSE	CHEMBL832944	Inhibitory concentration against RNA dependent RNA polymerase Nonstructural protein 5B of hepatitis C virus	B	BAO_0000357	single protein format	Hepatitis C virus					CHEMBL5375	Hepatitis C virus NS5B RNA-dependent RNA polymerase	Hepatitis C virus	SINGLE PROTEIN	CHEMBL1144286	1	Scientific Literature	Bioorg. Med. Chem. Lett.	2005
CHEMBL372498		0	404.38	0	4.24	71	O=C(O)/C(=C/c1ccc(Oc2ccccc2[N+](=O)[O-])cc1)NC(=O)c1ccccc1	IC50	'='	73000	nM	4.14			UO_0000065	10.23	0.19	-0.1	3.48	FALSE	CHEMBL832697	Inhibitory concentration against Hepatitis C virus NS5B polymerase	B	BAO_0000357	single protein format	Hepatitis C virus					CHEMBL5375	Hepatitis C virus NS5B RNA-dependent RNA polymerase	Hepatitis C virus	SINGLE PROTEIN	CHEMBL1140265	1	Scientific Literature	Bioorg. Med. Chem. Lett.	2005
CHEMBL364668		0	379.44	0	3.76	48	O=C(O)/C(=C/c1ccc(-c2ccccc2CO)s1)NC(=O)c1ccccc1	IC50	'='	20000	nM	4.7			UO_0000065	12.38	0.24	0.94	5.42	FALSE	CHEMBL832697	Inhibitory concentration against Hepatitis C virus NS5B polymerase	B	BAO_0000357	single protein format	Hepatitis C virus					CHEMBL5375	Hepatitis C virus NS5B RNA-dependent RNA polymerase	Hepatitis C virus	SINGLE PROTEIN	CHEMBL1140265	1	Scientific Literature	Bioorg. Med. Chem. Lett.	2005
CHEMBL191661		0	481.35	0	4.12	64 (table 4)	O=C(NCCO)/C(=C/c1ccc(Oc2ccccc2Br)cc1)NC(=O)c1ccccc1	CC50	'>'	50000	nM				UO_0000065					FALSE	CHEMBL839075	Cytotoxic concentration against RNA dependent RNA polymerase Nonstructural protein 5B (HCV NS5B polymerase) in Hepatitis C virus	B	BAO_0000357	single protein format	Hepatitis C virus					CHEMBL5375	Hepatitis C virus NS5B RNA-dependent RNA polymerase	Hepatitis C virus	SINGLE PROTEIN	CHEMBL1145278	1	Scientific Literature	Bioorg. Med. Chem. Lett.	2005
CHEMBL360438		0	424.48	0	2.61	5n	O=c1c(C2=NS(=O)(=O)c3ccccc3N2)c(O)c2ccccc2n1NCC1CCC1	EC50	'='	1030	nM	5.99			UO_0000065	14.1	0.27	3.38	5.31	FALSE	CHEMBL839779	Effective concentration against RNA dependent RNA polymerase Nonstructural protein 5B of genotype 1b Hepatitis C virus	B	BAO_0000357	single protein format	Hepatitis C virus					CHEMBL5375	Hepatitis C virus NS5B RNA-dependent RNA polymerase	Hepatitis C virus	SINGLE PROTEIN	CHEMBL1142034	1	Scientific Literature	Bioorg. Med. Chem. Lett.	2005
CHEMBL377889		0	580.08	2	7.91	2f	NC(=O)c1ccc(-c2ccc(Cl)cc2COc2ccc(-c3nc4cc(C(=O)O)ccc4n3C3CCCCC3)cc2)cc1	IC50	'='	69	nM	7.16			UO_0000065	12.35	0.23	-0.75	6.67	FALSE	CHEMBL866684	Inhibition of HCV 1b BK six His-tagged C-terminal truncated 544 amino acid NS5B RNA dependent RNA polymerase	B	BAO_0000357	single protein format	Hepatitis C virus subtype 1b					CHEMBL5375	Hepatitis C virus NS5B RNA-dependent RNA polymerase	Hepatitis C virus	SINGLE PROTEIN	CHEMBL1138950	1	Scientific Literature	J. Med. Chem.	2006
CHEMBL16326		0	192.17	0	1.24	1	O=C(O)C(=O)/C=C(\O)c1ccccc1	IC50	'='	5700	nM	5.24			UO_0000065	27.29	0.51	4	7.03	FALSE	CHEMBL828387	Inhibitory concentration required to inhibit HCV RNA dependent RNA polymerase Nonstructural protein 5B is determined	B	BAO_0000357	single protein format	Hepatitis C virus					CHEMBL5375	Hepatitis C virus NS5B RNA-dependent RNA polymerase	Hepatitis C virus	SINGLE PROTEIN	CHEMBL1138789	1	Scientific Literature	J. Med. Chem.	2004
CHEMBL188448		0	266.64	0	1.91	5	O=C(O)c1nc(-c2ccc(Cl)cc2)nc(O)c1O	IC50	'='	29000	nM	4.54			UO_0000065	17.02	0.34	2.63	4.38	TRUE	CHEMBL831435	Inhibitory concentration required to inhibit HCV RNA dependent RNA polymerase Nonstructural protein 5B in the presence of Mg2+ is determined	B	BAO_0000357	single protein format	Hepatitis C virus					CHEMBL5375	Hepatitis C virus NS5B RNA-dependent RNA polymerase	Hepatitis C virus	SINGLE PROTEIN	CHEMBL1138789	1	Scientific Literature	J. Med. Chem.	2004
CHEMBL206052		0	283.22	0	1.22	20	O=C(O)c1nc(-c2ccc([N+](=O)[O-])s2)nc(O)c1O	IC50	'='	16000	nM	4.8			UO_0000065	16.93	0.34	3.58	3.27	FALSE	CHEMBL864354	Inhibitory activity against HCV 1b BK NS5B deltaC55 RNA polymerase	B	BAO_0000357	single protein format	Hepatitis C virus subtype 1b					CHEMBL5375	Hepatitis C virus NS5B RNA-dependent RNA polymerase	Hepatitis C virus	SINGLE PROTEIN	CHEMBL1138187	1	Scientific Literature	J. Med. Chem.	2006
CHEMBL382395		0	234.19	0	-1.01	17	CS(=O)(=O)c1nc(O)c(O)c(C(=O)O)n1	IC50	'='	2400	nM	5.62			UO_0000065	24	0.51	6.63	4.08	FALSE	CHEMBL864354	Inhibitory activity against HCV 1b BK NS5B deltaC55 RNA polymerase	B	BAO_0000357	single protein format	Hepatitis C virus subtype 1b					CHEMBL5375	Hepatitis C virus NS5B RNA-dependent RNA polymerase	Hepatitis C virus	SINGLE PROTEIN	CHEMBL1138187	1	Scientific Literature	J. Med. Chem.	2006
CHEMBL181556		0	440.53	0	3.39	5j	CCCC(CC)Nn1c(=O)c(C2=NS(=O)(=O)c3ccccc3N2)c(O)c2ccccc21	IC50	'='	1890	nM	5.72			UO_0000065	12.99	0.25	2.33	5.07	FALSE	CHEMBL832928	Inhibitory concentration against RNA dependent RNA polymerase Nonstructural protein 5B of genotype 1a Hepatitis C virus	B	BAO_0000357	single protein format	Hepatitis C virus					CHEMBL5375	Hepatitis C virus NS5B RNA-dependent RNA polymerase	Hepatitis C virus	SINGLE PROTEIN	CHEMBL1142034	1	Scientific Literature	Bioorg. Med. Chem. Lett.	2005
CHEMBL210158		0	505.58	1	2.08	1	CC(C)CCn1c(=O)c(C2=NS(=O)(=O)c3cc(NS(C)(=O)=O)ccc3N2)c(O)c2cccnc21	IC50	'='	2.4	nM	8.62			UO_0000065	17.05	0.35	6.54	5.39	FALSE	CHEMBL865370	Inhibition of HCV 1a NS5B RNA polymerase	B	BAO_0000357	single protein format						CHEMBL5375	Hepatitis C virus NS5B RNA-dependent RNA polymerase	Hepatitis C virus	SINGLE PROTEIN	CHEMBL1138070	1	Scientific Literature	Bioorg. Med. Chem. Lett.	2006
CHEMBL239863		0	640.7	2	3.26	26	COC(=O)c1ccccc1NS(=O)(=O)Nc1ccc2c(c1)S(=O)(=O)N=C(c1c(O)c3cccnc3n(CCC(C)C)c1=O)N2	IC50	'='	129	nM	6.89			UO_0000065	10.75	0.21	3.63	3.48	FALSE	CHEMBL865370	Inhibition of HCV 1a NS5B RNA polymerase	B	BAO_0000357	single protein format						CHEMBL5375	Hepatitis C virus NS5B RNA-dependent RNA polymerase	Hepatitis C virus	SINGLE PROTEIN	CHEMBL1138070	1	Scientific Literature	Bioorg. Med. Chem. Lett.	2006
CHEMBL241423		0	639.72	1	2.84	20	CNC(=O)c1ccc(NS(=O)(=O)Nc2ccc3c(c2)S(=O)(=O)N=C(c2c(O)c4cccnc4n(CCC(C)C)c2=O)N3)cc1	IC50	'='	43	nM	7.37			UO_0000065	11.52	0.23	4.53	3.67	FALSE	CHEMBL865370	Inhibition of HCV 1a NS5B RNA polymerase	B	BAO_0000357	single protein format						CHEMBL5375	Hepatitis C virus NS5B RNA-dependent RNA polymerase	Hepatitis C virus	SINGLE PROTEIN	CHEMBL1138070	1	Scientific Literature	Bioorg. Med. Chem. Lett.	2006
CHEMBL382383		0	239.21	0	0.71	11	O=C(O)c1nc(-c2nccs2)nc(O)c1O	IC50	'='	16000	nM	4.8			UO_0000065	20.05	0.41	4.09	4.12	FALSE	CHEMBL862550	Inhibitory activity against HCV 1b BK NS5B deltaC55-R158K mutant RNA polymerase	B	BAO_0000357	single protein format	Hepatitis C virus subtype 1b					CHEMBL5375	Hepatitis C virus NS5B RNA-dependent RNA polymerase	Hepatitis C virus	SINGLE PROTEIN	CHEMBL1138187	1	Scientific Literature	J. Med. Chem.	2006
CHEMBL336296	URIDINE TRIPHOSPHATE	3	484.14	2	-2.5	UTP	O=c1ccn([C@@H]2O[C@H](COP(=O)(O)OP(=O)(O)OP(=O)(O)O)[C@@H](O)[C@H]2O)c(=O)[nH]1	Km	'='	20000	nM				UO_0000065					FALSE	CHEMBL862553	Activity against HCV 1b BK NS5B deltaC55-R158K mutant RNA polymerase	B	BAO_0000357	single protein format	Hepatitis C virus subtype 1b					CHEMBL5375	Hepatitis C virus NS5B RNA-dependent RNA polymerase	Hepatitis C virus	SINGLE PROTEIN	CHEMBL1138187	1	Scientific Literature	J. Med. Chem.	2006
CHEMBL180551		0	454.52	1	5.54	47	O=C(O)c1cnc(N(C(=O)c2ccc(OCc3cccc(F)c3)cc2)C2CCCCC2)s1	IC50	'='	6500	nM	5.19			UO_0000065	11.41	0.22	-0.35	6.51	FALSE	CHEMBL829165	Inhibitory concentration against RNA dependent RNA polymerase nonstructural protein 5B of hepatitis C virus	B	BAO_0000357	single protein format	Hepatitis C virus					CHEMBL5375	Hepatitis C virus NS5B RNA-dependent RNA polymerase	Hepatitis C virus	SINGLE PROTEIN	CHEMBL1144458	1	Scientific Literature	Bioorg. Med. Chem. Lett.	2005
CHEMBL383755		0	222.16	0	-0.02	13	O=C(O)c1nc(-c2ncc[nH]2)nc(O)c1O	Inhibition	'='	50	%				UO_0000187					FALSE	CHEMBL861557	Inhibitory activity against HCV 1b BK NS5B deltaC55 RNA polymerase at 50 uM	B	BAO_0000357	single protein format	Hepatitis C virus subtype 1b					CHEMBL5375	Hepatitis C virus NS5B RNA-dependent RNA polymerase	Hepatitis C virus	SINGLE PROTEIN	CHEMBL1138187	1	Scientific Literature	J. Med. Chem.	2006
CHEMBL202911		0	405.82	0	3.15	36	O=C(Cc1ccccc1Cl)Nc1ccsc1-c1nc(O)c(O)c(C(=O)O)n1	EC50	'='	53300	nM	4.27			UO_0000065	10.53	0.22	1.12	3.22	FALSE	CHEMBL864354	Inhibitory activity against HCV 1b BK NS5B deltaC55 RNA polymerase	B	BAO_0000357	single protein format	Hepatitis C virus subtype 1b					CHEMBL5375	Hepatitis C virus NS5B RNA-dependent RNA polymerase	Hepatitis C virus	SINGLE PROTEIN	CHEMBL1138187	1	Scientific Literature	J. Med. Chem.	2006
CHEMBL212470		0	511.36	1	3.47	11	O=c1c(C2=NS(=O)(=O)c3cccc(Br)c3N2)c(O)c2cccnc2n1Cc1ccccc1	IC50	'='	1170	nM	5.93			UO_0000065	11.6	0.25	2.46	5.22	FALSE	CHEMBL871397	Inhibition of HCV 1b NS5B RNA polymerase	B	BAO_0000357	single protein format	Hepatitis C virus subtype 1b					CHEMBL5375	Hepatitis C virus NS5B RNA-dependent RNA polymerase	Hepatitis C virus	SINGLE PROTEIN	CHEMBL1138030	1	Scientific Literature	Bioorg. Med. Chem. Lett.	2006
CHEMBL372685		0	447.45	1	6.01	60 (table 3)	O=C(CCC1CCCC1)N/C(=C\c1ccc(Oc2ccccc2C(F)(F)F)cc1)C(=O)O	CC50	'>'	100000	nM				UO_0000065					FALSE	CHEMBL839075	Cytotoxic concentration against RNA dependent RNA polymerase Nonstructural protein 5B (HCV NS5B polymerase) in Hepatitis C virus	B	BAO_0000357	single protein format	Hepatitis C virus					CHEMBL5375	Hepatitis C virus NS5B RNA-dependent RNA polymerase	Hepatitis C virus	SINGLE PROTEIN	CHEMBL1145278	1	Scientific Literature	Bioorg. Med. Chem. Lett.	2005
CHEMBL188442		0	438.28	1	5.1	2 (Page 2812)	O=C(O)/C(=C/c1ccc(Oc2ccccc2Br)cc1)NC(=O)c1ccccc1	Ratio	'='	280										FALSE	CHEMBL831764	Ratio for cellular to RNA dependent RNA polymerase Nonstructural protein 5B activity in Hepatitis C virus	B	BAO_0000357	single protein format	Hepatitis C virus					CHEMBL5375	Hepatitis C virus NS5B RNA-dependent RNA polymerase	Hepatitis C virus	SINGLE PROTEIN	CHEMBL1145278	1	Scientific Literature	Bioorg. Med. Chem. Lett.	2005
CHEMBL208343		0	270.31	0	0.51	17	Nc1ccccc1S(=O)(=O)N1CCC[C@H]1C(=O)O	IC50	'>'	20000	nM				UO_0000065					FALSE	CHEMBL869357	Inhibition of HCV NS5B RNA dependent RNA polymerase	B	BAO_0000357	single protein format	Hepatitis C virus					CHEMBL5375	Hepatitis C virus NS5B RNA-dependent RNA polymerase	Hepatitis C virus	SINGLE PROTEIN	CHEMBL1147722	1	Scientific Literature	J. Med. Chem.	2006
CHEMBL210597		0	374.63	0	2.59	25	O=C(O)[C@@H]1CCCN1S(=O)(=O)c1cc(Cl)c(Cl)c(Cl)c1O	IC50	'>'	100000	nM				UO_0000065					FALSE	CHEMBL868187	Cytotoxicity against human Huh7 cell line containing HCV genotype 1b replicon	F	BAO_0000219	cell-based format				Huh-7		CHEMBL5375	Hepatitis C virus NS5B RNA-dependent RNA polymerase	Hepatitis C virus	SINGLE PROTEIN	CHEMBL1147722	1	Scientific Literature	J. Med. Chem.	2006	CHEMBL3307515
CHEMBL192842		0	505.35	2	5.6	51 (table 2)	O=C(CCC1CCCC1)N/C(=C\c1ccc(Oc2ccccc2I)cc1)C(=O)O	IC50	'='	7000	nM	5.16			UO_0000065	10.2	0.24	-0.45	6.82	FALSE	CHEMBL827995	Inhibitory concentration against RNA dependent RNA polymerase Nonstructural protein 5B (HCV NS5B polymerase) in Hepatitis C virus	B	BAO_0000357	single protein format	Hepatitis C virus					CHEMBL5375	Hepatitis C virus NS5B RNA-dependent RNA polymerase	Hepatitis C virus	SINGLE PROTEIN	CHEMBL1145278	1	Scientific Literature	Bioorg. Med. Chem. Lett.	2005
CHEMBL14249	ADENOSINE TRIPHOSPHATE	2	507.18	3	-1.63	ATP	Nc1ncnc2c1ncn2[C@@H]1O[C@H](COP(=O)(O)OP(=O)(O)OP(=O)(O)O)[C@@H](O)[C@H]1O	Km	'='	133000	nM				UO_0000065					FALSE	CHEMBL826387	Steady-state kinetic constant for Hepatitis C Virus NS5BRdRp	F	BAO_0000019	assay format	Hepatitis C virus					CHEMBL5375	Hepatitis C virus NS5B RNA-dependent RNA polymerase	Hepatitis C virus	SINGLE PROTEIN	CHEMBL1143599	1	Scientific Literature	J. Med. Chem.	2005
CHEMBL192896		0	454.28	0	4.8	29 (table 1)	O=C(O)/C(=C/c1ccc(Oc2ccccc2Br)cc1)NC(=O)c1ccccc1O	CC50	'>'	100000	nM				UO_0000065					FALSE	CHEMBL839075	Cytotoxic concentration against RNA dependent RNA polymerase Nonstructural protein 5B (HCV NS5B polymerase) in Hepatitis C virus	B	BAO_0000357	single protein format	Hepatitis C virus					CHEMBL5375	Hepatitis C virus NS5B RNA-dependent RNA polymerase	Hepatitis C virus	SINGLE PROTEIN	CHEMBL1145278	1	Scientific Literature	Bioorg. Med. Chem. Lett.	2005
CHEMBL189927		0	456.27	1	5.24	33 (table 1)	O=C(O)/C(=C/c1ccc(Oc2ccccc2Br)cc1)NC(=O)c1ccccc1F	IC50	'='	180	nM	6.75			UO_0000065	14.78	0.32	1.5	8.92	FALSE	CHEMBL827995	Inhibitory concentration against RNA dependent RNA polymerase Nonstructural protein 5B (HCV NS5B polymerase) in Hepatitis C virus	B	BAO_0000357	single protein format	Hepatitis C virus					CHEMBL5375	Hepatitis C virus NS5B RNA-dependent RNA polymerase	Hepatitis C virus	SINGLE PROTEIN	CHEMBL1145278	1	Scientific Literature	Bioorg. Med. Chem. Lett.	2005
CHEMBL14249	ADENOSINE TRIPHOSPHATE	2	507.18	3	-1.63	ATP	Nc1ncnc2c1ncn2[C@@H]1O[C@H](COP(=O)(O)OP(=O)(O)OP(=O)(O)O)[C@@H](O)[C@H]1O	Ratio	'='	1700										FALSE	CHEMBL832589	Ratio of steady state kinetic constant and incorporation efficiency for Hepatitis C Virus NS5BRdRp	F	BAO_0000019	assay format	Hepatitis C virus					CHEMBL5375	Hepatitis C virus NS5B RNA-dependent RNA polymerase	Hepatitis C virus	SINGLE PROTEIN	CHEMBL1143599	1	Scientific Literature	J. Med. Chem.	2005
CHEMBL1161751		0	509.2	3	-2.33	3a	Nc1ncnc2c1ncn2[C@@H]1O[C@H](OCP(=O)(O)OP(=O)(O)O[PH](O)(O)O)[C@@H](O)[C@H]1O	Km	'='	241000	nM				UO_0000065					FALSE	CHEMBL826387	Steady-state kinetic constant for Hepatitis C Virus NS5BRdRp	F	BAO_0000019	assay format	Hepatitis C virus					CHEMBL5375	Hepatitis C virus NS5B RNA-dependent RNA polymerase	Hepatitis C virus	SINGLE PROTEIN	CHEMBL1143599	1	Scientific Literature	J. Med. Chem.	2005
CHEMBL1161773		0	521.25	3	-1.49	5a	C[C@@]1(O)[C@H](O)[C@@H](CCP(=O)(O)OP(=O)(O)O[PH](O)(O)O)O[C@H]1n1cnc2c(N)ncnc21	Ki	'='	327000	nM		Outside typical range		UO_0000065					FALSE	CHEMBL828787	Inhibition constant against ATP binding towards Hepatitis C Virus NS5BRdRp	F	BAO_0000019	assay format	Hepatitis C virus					CHEMBL5375	Hepatitis C virus NS5B RNA-dependent RNA polymerase	Hepatitis C virus	SINGLE PROTEIN	CHEMBL1143599	1	Scientific Literature	J. Med. Chem.	2005
CHEMBL178126		0	404.51	1	5.14	43	CN(C)C(=O)Cn1c(-c2ccccc2)c(C2CCCCC2)c2ccc(C(=O)O)cc21	IC50	'='	59	nM	7.23			UO_0000065	17.87	0.33	2.09	11.56	TRUE	CHEMBL830123	Inhibitory activity against by hepatitis C virus NS5B polymerase	B	BAO_0000357	single protein format	Hepatitis C virus					CHEMBL5375	Hepatitis C virus NS5B RNA-dependent RNA polymerase	Hepatitis C virus	SINGLE PROTEIN	CHEMBL1140313	1	Scientific Literature	J. Med. Chem.	2005
CHEMBL211710		0	448.46	0	2.42	7	O=c1c(C2=NS(=O)(=O)c3ccc(O)cc3N2)c(O)c2cccnc2n1Cc1ccccc1	IC50						Not Determined						FALSE	CHEMBL871399	Inhibition of HCV 1a NS5B RNA polymerase	B	BAO_0000357	single protein format	Hepatitis C virus subtype 1a					CHEMBL5375	Hepatitis C virus NS5B RNA-dependent RNA polymerase	Hepatitis C virus	SINGLE PROTEIN	CHEMBL1138030	1	Scientific Literature	Bioorg. Med. Chem. Lett.	2006
CHEMBL364269		0	430.55	1	5.58	3	O=C(Cn1c(-c2ccccc2)c(C2CCCCC2)c2ccc(C(=O)O)cc21)NCC1CC1	IC50	'='	63	nM	7.2			UO_0000065	16.72	0.31	1.62	10.09	FALSE	CHEMBL830123	Inhibitory activity against by hepatitis C virus NS5B polymerase	B	BAO_0000357	single protein format	Hepatitis C virus					CHEMBL5375	Hepatitis C virus NS5B RNA-dependent RNA polymerase	Hepatitis C virus	SINGLE PROTEIN	CHEMBL1140313	1	Scientific Literature	J. Med. Chem.	2005
CHEMBL372685		0	447.45	1	6.01	60 (table 3)	O=C(CCC1CCCC1)N/C(=C\c1ccc(Oc2ccccc2C(F)(F)F)cc1)C(=O)O	IC50	'='	6300	nM	5.2			UO_0000065	11.62	0.22	-0.81	6.88	FALSE	CHEMBL827995	Inhibitory concentration against RNA dependent RNA polymerase Nonstructural protein 5B (HCV NS5B polymerase) in Hepatitis C virus	B	BAO_0000357	single protein format	Hepatitis C virus					CHEMBL5375	Hepatitis C virus NS5B RNA-dependent RNA polymerase	Hepatitis C virus	SINGLE PROTEIN	CHEMBL1145278	1	Scientific Literature	Bioorg. Med. Chem. Lett.	2005
CHEMBL188277		0	280.67	0	1.99	4	COC(=O)c1nc(-c2ccc(Cl)cc2)nc(O)c1O	IC50	'>'	100000	nM				UO_0000065					FALSE	CHEMBL831435	Inhibitory concentration required to inhibit HCV RNA dependent RNA polymerase Nonstructural protein 5B in the presence of Mg2+ is determined	B	BAO_0000357	single protein format	Hepatitis C virus					CHEMBL5375	Hepatitis C virus NS5B RNA-dependent RNA polymerase	Hepatitis C virus	SINGLE PROTEIN	CHEMBL1138789	1	Scientific Literature	J. Med. Chem.	2004
CHEMBL188277		0	280.67	0	1.99	4	COC(=O)c1nc(-c2ccc(Cl)cc2)nc(O)c1O	IC50	'='	30000	nM	4.52			UO_0000065	16.11	0.33	2.53	4.89	FALSE	CHEMBL831436	Inhibitory concentration required to inhibit HCV RNA dependent RNA polymerase Nonstructural protein 5B in the presence of Mn2+ is determined	B	BAO_0000357	single protein format	Hepatitis C virus					CHEMBL5375	Hepatitis C virus NS5B RNA-dependent RNA polymerase	Hepatitis C virus	SINGLE PROTEIN	CHEMBL1138789	1	Scientific Literature	J. Med. Chem.	2004
CHEMBL382191		0	457.53	0	4.17	1h	CC(C)(C)CCN1C(=O)C(C2=NS(=O)(=O)c3ccccc3N2)=C(O)[C@@H]1c1ccc(F)cc1	IC50	'>'	748	nM				UO_0000065					FALSE	CHEMBL865646	Inhibition of HCV NS5B RNA dependent RNA polymerase	B	BAO_0000357	single protein format	Hepatitis C virus					CHEMBL5375	Hepatitis C virus NS5B RNA-dependent RNA polymerase	Hepatitis C virus	SINGLE PROTEIN	CHEMBL1146957	1	Scientific Literature	Bioorg. Med. Chem. Lett.	2006
CHEMBL607171		0	478.61	1	6.89	27-trans	CC(C)(C)[C@H]1CC[C@@H](N(C(=O)c2ccc(Oc3ccccc3)cc2)c2nc(C(=O)O)cs2)CC1	IC50	'='	4700	nM	5.33			UO_0000065	11.13	0.21	-1.56	6.68	FALSE	CHEMBL829165	Inhibitory concentration against RNA dependent RNA polymerase nonstructural protein 5B of hepatitis C virus	B	BAO_0000357	single protein format	Hepatitis C virus					CHEMBL5375	Hepatitis C virus NS5B RNA-dependent RNA polymerase	Hepatitis C virus	SINGLE PROTEIN	CHEMBL1144458	1	Scientific Literature	Bioorg. Med. Chem. Lett.	2005
CHEMBL441355		0	443.46	0	3.27	27	O=C(O)c1nc(-c2sccc2NS(=O)(=O)c2ccc3ccccc3c2)nc(O)c1O	IC50	'='	1420	nM	5.85			UO_0000065	13.19	0.27	2.58	3.91	FALSE	CHEMBL864354	Inhibitory activity against HCV 1b BK NS5B deltaC55 RNA polymerase	B	BAO_0000357	single protein format	Hepatitis C virus subtype 1b					CHEMBL5375	Hepatitis C virus NS5B RNA-dependent RNA polymerase	Hepatitis C virus	SINGLE PROTEIN	CHEMBL1138187	1	Scientific Literature	J. Med. Chem.	2006
CHEMBL362701		0	426.5	0	2.86	5c	CC(C)CCNn1c(=O)c(C2=NS(=O)(=O)c3ccccc3N2)c(O)c2ccccc21	IC50	'='	134	nM	6.87			UO_0000065	16.11	0.31	4.01	6.09	FALSE	CHEMBL832929	Inhibitory concentration against RNA dependent RNA polymerase Nonstructural protein 5B of genotype 1b Hepatitis C virus	B	BAO_0000357	single protein format	Hepatitis C virus					CHEMBL5375	Hepatitis C virus NS5B RNA-dependent RNA polymerase	Hepatitis C virus	SINGLE PROTEIN	CHEMBL1142034	1	Scientific Literature	Bioorg. Med. Chem. Lett.	2005
CHEMBL25773		0	453.33	1	5.2	15	N#Cc1cccc(CN(C(=O)c2ccc(Cl)cc2Cl)[C@@H](Cc2ccccc2)C(=O)O)c1	IC50	'='	800	nM	6.1			UO_0000065	13.45	0.27	0.9	7.49	FALSE	CHEMBL766521	Inhibitory activity against Hepatitis C RNA dependent RNA polymerase Nonstructural protein 5B (NS5B polymerase) expressed from baculovirus-infected Sf9 insect cells	B	BAO_0000219	cell-based format	Hepatitis C virus			Sf9		CHEMBL5375	Hepatitis C virus NS5B RNA-dependent RNA polymerase	Hepatitis C virus	SINGLE PROTEIN	CHEMBL1144916	1	Scientific Literature	J. Med. Chem.	2003	CHEMBL3308860
CHEMBL360438		0	424.48	0	2.61	5n	O=c1c(C2=NS(=O)(=O)c3ccccc3N2)c(O)c2ccccc2n1NCC1CCC1	IC50	'='	108	nM	6.97			UO_0000065	16.41	0.32	4.36	6.18	FALSE	CHEMBL832929	Inhibitory concentration against RNA dependent RNA polymerase Nonstructural protein 5B of genotype 1b Hepatitis C virus	B	BAO_0000357	single protein format	Hepatitis C virus					CHEMBL5375	Hepatitis C virus NS5B RNA-dependent RNA polymerase	Hepatitis C virus	SINGLE PROTEIN	CHEMBL1142034	1	Scientific Literature	Bioorg. Med. Chem. Lett.	2005
CHEMBL360438		0	424.48	0	2.61	5n	O=c1c(C2=NS(=O)(=O)c3ccccc3N2)c(O)c2ccccc2n1NCC1CCC1	IC50	'='	278	nM	6.56			UO_0000065	15.44	0.3	3.95	5.81	FALSE	CHEMBL832928	Inhibitory concentration against RNA dependent RNA polymerase Nonstructural protein 5B of genotype 1a Hepatitis C virus	B	BAO_0000357	single protein format	Hepatitis C virus					CHEMBL5375	Hepatitis C virus NS5B RNA-dependent RNA polymerase	Hepatitis C virus	SINGLE PROTEIN	CHEMBL1142034	1	Scientific Literature	Bioorg. Med. Chem. Lett.	2005
CHEMBL179934		0	466.56	0	3.78	5q	O=c1c(C2=NS(=O)(=O)c3ccccc3N2)c(O)c2ccccc2n1NCC1CCCCCC1	IC50	'='	217	nM	6.66			UO_0000065	14.28	0.28	2.88	5.91	FALSE	CHEMBL832929	Inhibitory concentration against RNA dependent RNA polymerase Nonstructural protein 5B of genotype 1b Hepatitis C virus	B	BAO_0000357	single protein format	Hepatitis C virus					CHEMBL5375	Hepatitis C virus NS5B RNA-dependent RNA polymerase	Hepatitis C virus	SINGLE PROTEIN	CHEMBL1142034	1	Scientific Literature	Bioorg. Med. Chem. Lett.	2005
CHEMBL186437		0	280.67	0	2.21	9	COc1c(O)nc(-c2ccc(Cl)cc2)nc1C(=O)O	IC50	'>'	50000	nM				UO_0000065					FALSE	CHEMBL831435	Inhibitory concentration required to inhibit HCV RNA dependent RNA polymerase Nonstructural protein 5B in the presence of Mg2+ is determined	B	BAO_0000357	single protein format	Hepatitis C virus					CHEMBL5375	Hepatitis C virus NS5B RNA-dependent RNA polymerase	Hepatitis C virus	SINGLE PROTEIN	CHEMBL1138789	1	Scientific Literature	J. Med. Chem.	2004
CHEMBL175882		0	420.83	0	3.29	34	O=C(NCc1ccccc1Cl)Nc1ccsc1-c1nc(O)c(O)c(C(=O)O)n1	IC50	'='	130	nM	6.89			UO_0000065	16.36	0.34	3.6	4.76	FALSE	CHEMBL864366	Inhibitory activity against HCV 1b BK NS5B RNA polymerase	B	BAO_0000357	single protein format	Hepatitis C virus subtype 1b					CHEMBL5375	Hepatitis C virus NS5B RNA-dependent RNA polymerase	Hepatitis C virus	SINGLE PROTEIN	CHEMBL1138187	1	Scientific Literature	J. Med. Chem.	2006
CHEMBL181653		0	238.22	0	1.31	3	O=C(O)c1nc(-c2cccs2)nc(O)c1O	IC50	'='	240	nM	6.62			UO_0000065	27.79	0.57	5.31	6.39	FALSE	CHEMBL862541	Inhibitory activity against HCV 1b BK NS5B deltaC55 RNA polymerase involving manganese chelation	B	BAO_0000357	single protein format	Hepatitis C virus subtype 1b					CHEMBL5375	Hepatitis C virus NS5B RNA-dependent RNA polymerase	Hepatitis C virus	SINGLE PROTEIN	CHEMBL1138187	1	Scientific Literature	J. Med. Chem.	2006
CHEMBL382383		0	239.21	0	0.71	11	O=C(O)c1nc(-c2nccs2)nc(O)c1O	IC50	'='	760	nM	6.12			UO_0000065	25.58	0.52	5.41	5.26	FALSE	CHEMBL854142	Inhibitory activity against HCV 1b BK NS5B deltaC55 RNA polymerase involving magnesium chelation	B	BAO_0000357	single protein format	Hepatitis C virus subtype 1b					CHEMBL5375	Hepatitis C virus NS5B RNA-dependent RNA polymerase	Hepatitis C virus	SINGLE PROTEIN	CHEMBL1138187	1	Scientific Literature	J. Med. Chem.	2006
CHEMBL205026		0	222.16	0	0.85	10	O=C(O)c1nc(-c2ccco2)nc(O)c1O	IC50	'='	2900	nM	5.54			UO_0000065	24.93	0.47	4.69	4.75	FALSE	CHEMBL854142	Inhibitory activity against HCV 1b BK NS5B deltaC55 RNA polymerase involving magnesium chelation	B	BAO_0000357	single protein format	Hepatitis C virus subtype 1b					CHEMBL5375	Hepatitis C virus NS5B RNA-dependent RNA polymerase	Hepatitis C virus	SINGLE PROTEIN	CHEMBL1138187	1	Scientific Literature	J. Med. Chem.	2006
CHEMBL203976		0	238.24	0	1.63	7	O=C(O)c1nc(C2CCCCC2)nc(O)c1O	IC50	'>'	50000	nM				UO_0000065					FALSE	CHEMBL854142	Inhibitory activity against HCV 1b BK NS5B deltaC55 RNA polymerase involving magnesium chelation	B	BAO_0000357	single protein format	Hepatitis C virus subtype 1b					CHEMBL5375	Hepatitis C virus NS5B RNA-dependent RNA polymerase	Hepatitis C virus	SINGLE PROTEIN	CHEMBL1138187	1	Scientific Literature	J. Med. Chem.	2006
CHEMBL366051		0	252.25	0	0.91	6	Cn1c(-c2cccs2)nc(C(=O)O)c(O)c1=O	IC50	'='	460	nM	6.34			UO_0000065	25.12	0.51	5.43	6.86	FALSE	CHEMBL862541	Inhibitory activity against HCV 1b BK NS5B deltaC55 RNA polymerase involving manganese chelation	B	BAO_0000357	single protein format	Hepatitis C virus subtype 1b					CHEMBL5375	Hepatitis C virus NS5B RNA-dependent RNA polymerase	Hepatitis C virus	SINGLE PROTEIN	CHEMBL1138187	1	Scientific Literature	J. Med. Chem.	2006
CHEMBL206518		0	421.82	0	3.72	35	O=C(Nc1ccsc1-c1nc(O)c(O)c(C(=O)O)n1)OCc1ccccc1Cl	IC50	'='	340	nM	6.47			UO_0000065	15.33	0.32	2.75	4.56	FALSE	CHEMBL862549	Inhibitory activity against HCV 1b BK NS5B deltaC55-R158M mutant RNA polymerase	B	BAO_0000357	single protein format	Hepatitis C virus subtype 1b					CHEMBL5375	Hepatitis C virus NS5B RNA-dependent RNA polymerase	Hepatitis C virus	SINGLE PROTEIN	CHEMBL1138187	1	Scientific Literature	J. Med. Chem.	2006
CHEMBL181158		0	402.47	0	3.3	28	CC(C)C[C@@]1(C(=O)O)C[C@H](C(=O)O)[C@H](c2cccs2)N1C(=O)c1ccncc1	IC50	'>'	20000	nM				UO_0000065					FALSE	CHEMBL832931	Inhibitory concentration against Hepatitis C virus RNA dependent RNA polymerase Nonstructural protein 5B	B	BAO_0000357	single protein format	Hepatitis C virus					CHEMBL5375	Hepatitis C virus NS5B RNA-dependent RNA polymerase	Hepatitis C virus	SINGLE PROTEIN	CHEMBL1142030	1	Scientific Literature	Bioorg. Med. Chem. Lett.	2005
CHEMBL433957		0	486.96	0	3.73	4n	O=c1c(C2=NS(=O)(=O)c3ccccc3N2)c(O)c2ccccc2n1NCc1ccc(Cl)s1	IC50	'='	1450	nM	5.84			UO_0000065	11.99	0.25	2.11	5.18	FALSE	CHEMBL832929	Inhibitory concentration against RNA dependent RNA polymerase Nonstructural protein 5B of genotype 1b Hepatitis C virus	B	BAO_0000357	single protein format	Hepatitis C virus					CHEMBL5375	Hepatitis C virus NS5B RNA-dependent RNA polymerase	Hepatitis C virus	SINGLE PROTEIN	CHEMBL1142034	1	Scientific Literature	Bioorg. Med. Chem. Lett.	2005
CHEMBL278785		0	550.46	2	7.81	21	O=C(O)[C@H](Cc1ccccc1)N(Cc1ccc(-c2cc3ccccc3o2)s1)C(=O)c1ccc(Cl)cc1Cl	IC50	'='	8600	nM	5.07			UO_0000065	9.2	0.19	-2.74	7.16	FALSE	CHEMBL766521	Inhibitory activity against Hepatitis C RNA dependent RNA polymerase Nonstructural protein 5B (NS5B polymerase) expressed from baculovirus-infected Sf9 insect cells	B	BAO_0000219	cell-based format	Hepatitis C virus			Sf9		CHEMBL5375	Hepatitis C virus NS5B RNA-dependent RNA polymerase	Hepatitis C virus	SINGLE PROTEIN	CHEMBL1144916	1	Scientific Literature	J. Med. Chem.	2003	CHEMBL3308860
CHEMBL361221		0	426.5	0	3	5b	CCCCCNn1c(=O)c(C2=NS(=O)(=O)c3ccccc3N2)c(O)c2ccccc21	IC50	'='	1000	nM	6			UO_0000065	14.07	0.27	3	5.32	FALSE	CHEMBL832929	Inhibitory concentration against RNA dependent RNA polymerase Nonstructural protein 5B of genotype 1b Hepatitis C virus	B	BAO_0000357	single protein format	Hepatitis C virus					CHEMBL5375	Hepatitis C virus NS5B RNA-dependent RNA polymerase	Hepatitis C virus	SINGLE PROTEIN	CHEMBL1142034	1	Scientific Literature	Bioorg. Med. Chem. Lett.	2005
CHEMBL607288		0	464.59	1	6.5	29	C[C@@H]1C[C@@H](N(C(=O)c2ccc(Oc3ccccc3)cc2)c2nc(C(=O)O)cs2)CC(C)(C)C1	IC50	'='	5500	nM	5.26			UO_0000065	11.32	0.22	-1.24	6.6	FALSE	CHEMBL829165	Inhibitory concentration against RNA dependent RNA polymerase nonstructural protein 5B of hepatitis C virus	B	BAO_0000357	single protein format	Hepatitis C virus					CHEMBL5375	Hepatitis C virus NS5B RNA-dependent RNA polymerase	Hepatitis C virus	SINGLE PROTEIN	CHEMBL1144458	1	Scientific Literature	Bioorg. Med. Chem. Lett.	2005
CHEMBL362571		0	262.22	0	1.26	8	COc1nc(-c2cccc(O)c2)nc(C(=O)O)c1O	IC50	'>'	50000	nM				UO_0000065					FALSE	CHEMBL831435	Inhibitory concentration required to inhibit HCV RNA dependent RNA polymerase Nonstructural protein 5B in the presence of Mg2+ is determined	B	BAO_0000357	single protein format	Hepatitis C virus					CHEMBL5375	Hepatitis C virus NS5B RNA-dependent RNA polymerase	Hepatitis C virus	SINGLE PROTEIN	CHEMBL1138789	1	Scientific Literature	J. Med. Chem.	2004
CHEMBL179389		0	470.37	1	5.21	27	CC(C)C[C@@]1(C(=O)O)C[C@H](C(=O)O)[C@H](c2cccs2)N1C(=O)c1ccc(Cl)c(Cl)c1	IC50	'='	600	nM	6.22			UO_0000065	13.23	0.28	1.01	6.56	FALSE	CHEMBL832931	Inhibitory concentration against Hepatitis C virus RNA dependent RNA polymerase Nonstructural protein 5B	B	BAO_0000357	single protein format	Hepatitis C virus					CHEMBL5375	Hepatitis C virus NS5B RNA-dependent RNA polymerase	Hepatitis C virus	SINGLE PROTEIN	CHEMBL1142030	1	Scientific Literature	Bioorg. Med. Chem. Lett.	2005
CHEMBL180948		0	469.48	0	4.92	14(+)	CC(C)C[C@@]1(C(=O)O)C[C@H](C(=O)O)[C@H](c2cccs2)N1C(=O)c1ccc(C(F)(F)F)cc1	IC50	'='	190	nM	6.72			UO_0000065	14.32	0.29	1.8	7.08	FALSE	CHEMBL832931	Inhibitory concentration against Hepatitis C virus RNA dependent RNA polymerase Nonstructural protein 5B	B	BAO_0000357	single protein format	Hepatitis C virus					CHEMBL5375	Hepatitis C virus NS5B RNA-dependent RNA polymerase	Hepatitis C virus	SINGLE PROTEIN	CHEMBL1142030	1	Scientific Literature	Bioorg. Med. Chem. Lett.	2005
CHEMBL607287		0	464.59	1	6.5	19	C[C@@H]1C[C@@H](N(C(=O)c2ccc(Oc3ccccc3)cc2)c2ncc(C(=O)O)s2)CC(C)(C)C1	IC50	'='	6000	nM	5.22			UO_0000065	11.24	0.22	-1.28	6.55	FALSE	CHEMBL829165	Inhibitory concentration against RNA dependent RNA polymerase nonstructural protein 5B of hepatitis C virus	B	BAO_0000357	single protein format	Hepatitis C virus					CHEMBL5375	Hepatitis C virus NS5B RNA-dependent RNA polymerase	Hepatitis C virus	SINGLE PROTEIN	CHEMBL1144458	1	Scientific Literature	Bioorg. Med. Chem. Lett.	2005
CHEMBL198718		0	450.68	0	4	1	O=C(O)C(=O)/C=C(\O)c1cccc(NS(=O)(=O)c2cc(Cl)c(Cl)cc2Cl)c1	IC50	'='	49	nM	7.31			UO_0000065	16.22	0.37	3.31	6.05	FALSE	CHEMBL880598	Inhibitory concentration against NS5B HCV polymerase using [alpha-32P]UTP as radioligand (30 degree C for 2 h, at pH 7.5 with Tris-HCl buffer)	B	BAO_0000357	single protein format	Hepatitis C virus					CHEMBL5375	Hepatitis C virus NS5B RNA-dependent RNA polymerase	Hepatitis C virus	SINGLE PROTEIN	CHEMBL1140440	1	Scientific Literature	J. Med. Chem.	2005
CHEMBL370821		0	340.81	0	4.11	9	O=C(O)C(=O)/C=C(\O)c1ccsc1Sc1cccc(Cl)c1	IC50	'='	7500	nM	5.12			UO_0000065	15.04	0.33	1.01	6.87	FALSE	CHEMBL880598	Inhibitory concentration against NS5B HCV polymerase using [alpha-32P]UTP as radioligand (30 degree C for 2 h, at pH 7.5 with Tris-HCl buffer)	B	BAO_0000357	single protein format	Hepatitis C virus					CHEMBL5375	Hepatitis C virus NS5B RNA-dependent RNA polymerase	Hepatitis C virus	SINGLE PROTEIN	CHEMBL1140440	1	Scientific Literature	J. Med. Chem.	2005
CHEMBL365185		0	306.31	0	3.03	14	O=C(O)C(=O)/C=C(\O)c1sccc1Cc1cccc(F)c1	IC50	'='	9900	nM	5			UO_0000065	16.34	0.33	1.97	6.71	FALSE	CHEMBL880598	Inhibitory concentration against NS5B HCV polymerase using [alpha-32P]UTP as radioligand (30 degree C for 2 h, at pH 7.5 with Tris-HCl buffer)	B	BAO_0000357	single protein format	Hepatitis C virus					CHEMBL5375	Hepatitis C virus NS5B RNA-dependent RNA polymerase	Hepatitis C virus	SINGLE PROTEIN	CHEMBL1140440	1	Scientific Literature	J. Med. Chem.	2005
CHEMBL370124		0	262.26	0	1.73	17	N#CCCCCn1cccc1/C(O)=C/C(=O)C(=O)O	IC50	'='	13000	nM	4.89			UO_0000065	18.63	0.35	3.16	4.73	FALSE	CHEMBL880598	Inhibitory concentration against NS5B HCV polymerase using [alpha-32P]UTP as radioligand (30 degree C for 2 h, at pH 7.5 with Tris-HCl buffer)	B	BAO_0000357	single protein format	Hepatitis C virus					CHEMBL5375	Hepatitis C virus NS5B RNA-dependent RNA polymerase	Hepatitis C virus	SINGLE PROTEIN	CHEMBL1140440	1	Scientific Literature	J. Med. Chem.	2005
CHEMBL197897		0	210.19	0	1.45	18	Cc1cc(/C(O)=C/C(=O)C(=O)O)c(C)o1	IC50	'='	14000	nM	4.85			UO_0000065	23.09	0.44	3.4	5.53	FALSE	CHEMBL880598	Inhibitory concentration against NS5B HCV polymerase using [alpha-32P]UTP as radioligand (30 degree C for 2 h, at pH 7.5 with Tris-HCl buffer)	B	BAO_0000357	single protein format	Hepatitis C virus					CHEMBL5375	Hepatitis C virus NS5B RNA-dependent RNA polymerase	Hepatitis C virus	SINGLE PROTEIN	CHEMBL1140440	1	Scientific Literature	J. Med. Chem.	2005
CHEMBL372984		0	305.72	0	2.74	24	O=C(O)C(=O)/C=C(\O)c1cccn1Cc1ccccc1Cl	IC50	'='	24000	nM	4.62			UO_0000065	15.11	0.3	1.88	5.81	FALSE	CHEMBL880598	Inhibitory concentration against NS5B HCV polymerase using [alpha-32P]UTP as radioligand (30 degree C for 2 h, at pH 7.5 with Tris-HCl buffer)	B	BAO_0000357	single protein format	Hepatitis C virus					CHEMBL5375	Hepatitis C virus NS5B RNA-dependent RNA polymerase	Hepatitis C virus	SINGLE PROTEIN	CHEMBL1140440	1	Scientific Literature	J. Med. Chem.	2005
CHEMBL194900		0	196.16	0	1.14	35	Cc1ccc(/C(O)=C/C(=O)C(=O)O)o1	IC50	'='	58000	nM	4.24			UO_0000065	21.6	0.41	3.1	4.83	FALSE	CHEMBL880598	Inhibitory concentration against NS5B HCV polymerase using [alpha-32P]UTP as radioligand (30 degree C for 2 h, at pH 7.5 with Tris-HCl buffer)	B	BAO_0000357	single protein format	Hepatitis C virus					CHEMBL5375	Hepatitis C virus NS5B RNA-dependent RNA polymerase	Hepatitis C virus	SINGLE PROTEIN	CHEMBL1140440	1	Scientific Literature	J. Med. Chem.	2005
CHEMBL364520		0	261.28	0	1.84	39	O=C(O)C(=O)/C=C(\O)c1cccc(N2CCCC2)c1	IC50	'='	84000	nM	4.08			UO_0000065	15.6	0.29	2.24	5.24	FALSE	CHEMBL880598	Inhibitory concentration against NS5B HCV polymerase using [alpha-32P]UTP as radioligand (30 degree C for 2 h, at pH 7.5 with Tris-HCl buffer)	B	BAO_0000357	single protein format	Hepatitis C virus					CHEMBL5375	Hepatitis C virus NS5B RNA-dependent RNA polymerase	Hepatitis C virus	SINGLE PROTEIN	CHEMBL1140440	1	Scientific Literature	J. Med. Chem.	2005
CHEMBL198423		0	373.75	0	3.05	41	N#Cc1cccc(Cl)c1COc1cc(O)cc(/C(O)=C/C(=O)C(=O)O)c1	IC50	'='	100	nM	7			UO_0000065	18.73	0.37	3.95	5.48	FALSE	CHEMBL880598	Inhibitory concentration against NS5B HCV polymerase using [alpha-32P]UTP as radioligand (30 degree C for 2 h, at pH 7.5 with Tris-HCl buffer)	B	BAO_0000357	single protein format	Hepatitis C virus					CHEMBL5375	Hepatitis C virus NS5B RNA-dependent RNA polymerase	Hepatitis C virus	SINGLE PROTEIN	CHEMBL1140440	1	Scientific Literature	J. Med. Chem.	2005
CHEMBL196211		0	222.2	0	1.25	55	COc1cccc(/C(O)=C/C(=O)C(=O)O)c1	IC50	'='	40000	nM	4.4			UO_0000065	19.79	0.38	3.15	5.25	FALSE	CHEMBL880598	Inhibitory concentration against NS5B HCV polymerase using [alpha-32P]UTP as radioligand (30 degree C for 2 h, at pH 7.5 with Tris-HCl buffer)	B	BAO_0000357	single protein format	Hepatitis C virus					CHEMBL5375	Hepatitis C virus NS5B RNA-dependent RNA polymerase	Hepatitis C virus	SINGLE PROTEIN	CHEMBL1140440	1	Scientific Literature	J. Med. Chem.	2005
CHEMBL384446		0	588.71	1	3.29	32	CC(C)CCn1c(=O)c(C2=NS(=O)(=O)c3cc(NS(=O)(=O)NC4CCCCC4)ccc3N2)c(O)c2cccnc21	IC50	'='	67	nM	7.17			UO_0000065	12.19	0.24	3.88	4.17	FALSE	CHEMBL865370	Inhibition of HCV 1a NS5B RNA polymerase	B	BAO_0000357	single protein format						CHEMBL5375	Hepatitis C virus NS5B RNA-dependent RNA polymerase	Hepatitis C virus	SINGLE PROTEIN	CHEMBL1138070	1	Scientific Literature	Bioorg. Med. Chem. Lett.	2006
CHEMBL377394		0	625.69	1	2.58	24	CC(C)CCn1c(=O)c(C2=NS(=O)(=O)c3cc(NS(=O)(=O)Nc4cccc(C(N)=O)c4)ccc3N2)c(O)c2cccnc21	IC50	'='	43	nM	7.37			UO_0000065	11.77	0.23	4.79	3.43	FALSE	CHEMBL865370	Inhibition of HCV 1a NS5B RNA polymerase	B	BAO_0000357	single protein format						CHEMBL5375	Hepatitis C virus NS5B RNA-dependent RNA polymerase	Hepatitis C virus	SINGLE PROTEIN	CHEMBL1138070	1	Scientific Literature	Bioorg. Med. Chem. Lett.	2006
CHEMBL378727		0	626.67	1	3.18	19	CC(C)CCn1c(=O)c(C2=NS(=O)(=O)c3cc(NS(=O)(=O)Nc4ccc(C(=O)O)cc4)ccc3N2)c(O)c2cccnc21	IC50	'='	20	nM	7.7			UO_0000065	12.29	0.24	4.52	3.68	FALSE	CHEMBL865370	Inhibition of HCV 1a NS5B RNA polymerase	B	BAO_0000357	single protein format						CHEMBL5375	Hepatitis C virus NS5B RNA-dependent RNA polymerase	Hepatitis C virus	SINGLE PROTEIN	CHEMBL1138070	1	Scientific Literature	Bioorg. Med. Chem. Lett.	2006
CHEMBL174955		0	354.48	1	5.53	pg 123	CCc1ccc(-c2nc3cc(C(=O)O)ccc3n2C2CCCCC2)s1	IC50	'>'	30000	nM				UO_0000065					FALSE	CHEMBL750250	Inhibitory activity against NS5B polymerase of hepatitis C virus	B	BAO_0000357	single protein format	Hepatitis C virus					CHEMBL5375	Hepatitis C virus NS5B RNA-dependent RNA polymerase	Hepatitis C virus	SINGLE PROTEIN	CHEMBL1149223	1	Scientific Literature	Bioorg. Med. Chem. Lett.	2004
CHEMBL181773		0	403.44	1	5.02	6ee	Fc1ccc(-c2nc3ncnc(N4CCCCC4)c3nc2-c2ccc(F)cc2)cc1	IC50	'='	68000	nM	4.17			UO_0000065	10.33	0.19	-0.85	7.6	FALSE	CHEMBL832944	Inhibitory concentration against RNA dependent RNA polymerase Nonstructural protein 5B of hepatitis C virus	B	BAO_0000357	single protein format	Hepatitis C virus					CHEMBL5375	Hepatitis C virus NS5B RNA-dependent RNA polymerase	Hepatitis C virus	SINGLE PROTEIN	CHEMBL1144286	1	Scientific Literature	Bioorg. Med. Chem. Lett.	2005
CHEMBL109516		0	200.1	0	-0.26	2	O=C(O)c1cc(=O)c(O)c(C(=O)O)o1	IC50	'='	18000	nM	4.75			UO_0000065	23.71	0.46	5	3.79	FALSE	CHEMBL750255	Inhibitory potency of compound in presence of Mn2+ ion against NS5B HCV polymerase	B	BAO_0000357	single protein format	Hepatitis C virus					CHEMBL5375	Hepatitis C virus NS5B RNA-dependent RNA polymerase	Hepatitis C virus	SINGLE PROTEIN	CHEMBL1146656	1	Scientific Literature	Bioorg. Med. Chem. Lett.	2004
CHEMBL369552		0	438.96	1	5.8	15	CN(C)C(=O)Cn1c(-c2ccccc2Cl)c(C2CCCCC2)c2ccc(C(=O)O)cc21	IC50	'='	372	nM	6.43			UO_0000065	14.65	0.28	0.63	10.28	FALSE	CHEMBL829597	Inhibitory activity against RNA dependent RNA polymerase nonstructural protein 5B in hepatitis C virus; n=1	B	BAO_0000357	single protein format	Hepatitis C virus					CHEMBL5375	Hepatitis C virus NS5B RNA-dependent RNA polymerase	Hepatitis C virus	SINGLE PROTEIN	CHEMBL1142688	1	Scientific Literature	J. Med. Chem.	2005
CHEMBL362834		0	438.96	1	5.8	16	CN(C)C(=O)Cn1c(-c2cccc(Cl)c2)c(C2CCCCC2)c2ccc(C(=O)O)cc21	EC50	'='	4.5	nM	8.35			UO_0000065	19.01	0.37	2.55	13.35	FALSE	CHEMBL839761	Effective concentration to inhibit the activity of RNA dependent RNA polymerase nonstructural protein 5B in hepatitis C virus; n=1	B	BAO_0000357	single protein format	Hepatitis C virus					CHEMBL5375	Hepatitis C virus NS5B RNA-dependent RNA polymerase	Hepatitis C virus	SINGLE PROTEIN	CHEMBL1142688	1	Scientific Literature	J. Med. Chem.	2005
CHEMBL24396		0	567.09	2	8.81	JTI	COc1ccc(-c2ccc(Cl)cc2)c(COc2ccc(-c3nc4cc(C(=O)O)ccc4n3C3CCCCC3)cc2)c1	IC50	'='	620	nM	6.21			UO_0000065	10.95	0.21	-2.6	8.44	FALSE	CHEMBL766521	Inhibitory activity against Hepatitis C RNA dependent RNA polymerase Nonstructural protein 5B (NS5B polymerase) expressed from baculovirus-infected Sf9 insect cells	B	BAO_0000219	cell-based format	Hepatitis C virus			Sf9		CHEMBL5375	Hepatitis C virus NS5B RNA-dependent RNA polymerase	Hepatitis C virus	SINGLE PROTEIN	CHEMBL1144916	1	Scientific Literature	J. Med. Chem.	2003	CHEMBL3308860
CHEMBL278580		0	507.21	2	6.09	6	O=C(O)[C@@H](Cc1ccccc1)N(Cc1cccc(Br)c1)C(=O)c1ccc(Cl)cc1Cl	IC50	'='	8600	nM	5.07			UO_0000065	9.99	0.23	-1.02	8.79	FALSE	CHEMBL766521	Inhibitory activity against Hepatitis C RNA dependent RNA polymerase Nonstructural protein 5B (NS5B polymerase) expressed from baculovirus-infected Sf9 insect cells	B	BAO_0000219	cell-based format	Hepatitis C virus			Sf9		CHEMBL5375	Hepatitis C virus NS5B RNA-dependent RNA polymerase	Hepatitis C virus	SINGLE PROTEIN	CHEMBL1144916	1	Scientific Literature	J. Med. Chem.	2003	CHEMBL3308860
CHEMBL178443		0	469.48	0	4.92	26	CC(C)C[C@@]1(C(=O)O)C[C@H](C(=O)O)[C@H](c2cccs2)N1C(=O)c1ccccc1C(F)(F)F	IC50	'>'	20000	nM				UO_0000065					FALSE	CHEMBL832931	Inhibitory concentration against Hepatitis C virus RNA dependent RNA polymerase Nonstructural protein 5B	B	BAO_0000357	single protein format	Hepatitis C virus					CHEMBL5375	Hepatitis C virus NS5B RNA-dependent RNA polymerase	Hepatitis C virus	SINGLE PROTEIN	CHEMBL1142030	1	Scientific Literature	Bioorg. Med. Chem. Lett.	2005
CHEMBL181570		0	409.55	0	4.56	30	CCCCCCC(=O)N1[C@@H](c2cccs2)[C@@H](C(=O)O)C[C@@]1(CC(C)C)C(=O)O	IC50	'>'	20000	nM				UO_0000065					FALSE	CHEMBL832931	Inhibitory concentration against Hepatitis C virus RNA dependent RNA polymerase Nonstructural protein 5B	B	BAO_0000357	single protein format	Hepatitis C virus					CHEMBL5375	Hepatitis C virus NS5B RNA-dependent RNA polymerase	Hepatitis C virus	SINGLE PROTEIN	CHEMBL1142030	1	Scientific Literature	Bioorg. Med. Chem. Lett.	2005
CHEMBL362796		0	464.44	0	3.56	11	NCCC[C@@]1(C(=O)O)C[C@H](C(=O)O)[C@H](c2ccccc2)N1C(=O)c1ccc(C(F)(F)F)cc1	IC50	'>'	20000	nM				UO_0000065					FALSE	CHEMBL832931	Inhibitory concentration against Hepatitis C virus RNA dependent RNA polymerase Nonstructural protein 5B	B	BAO_0000357	single protein format	Hepatitis C virus					CHEMBL5375	Hepatitis C virus NS5B RNA-dependent RNA polymerase	Hepatitis C virus	SINGLE PROTEIN	CHEMBL1142030	1	Scientific Literature	Bioorg. Med. Chem. Lett.	2005
CHEMBL180706		0	453.51	0	2.47	4j	O=c1c(C2=NS(=O)(=O)c3ccccc3N2)c(O)c2ccccc2n1NCc1nccs1	IC50	'='	35800	nM	4.45			UO_0000065	9.8	0.2	1.98	3.54	FALSE	CHEMBL832928	Inhibitory concentration against RNA dependent RNA polymerase Nonstructural protein 5B of genotype 1a Hepatitis C virus	B	BAO_0000357	single protein format	Hepatitis C virus					CHEMBL5375	Hepatitis C virus NS5B RNA-dependent RNA polymerase	Hepatitis C virus	SINGLE PROTEIN	CHEMBL1142034	1	Scientific Literature	Bioorg. Med. Chem. Lett.	2005
CHEMBL201385		0	409.47	0	3.07	27	O=c1c(C2=NS(=O)(=O)c3ccccc3N2)c(O)c2ccccc2n1CC1CCC1	IC50	'='	49	nM	7.31			UO_0000065	17.85	0.34	4.24	7.25	FALSE	CHEMBL867029	Inhibitory activity against HCV delta 21 NS5B RNA polymerase by SPA assay	B	BAO_0000357	single protein format	Hepatitis C virus subtype 1b					CHEMBL5375	Hepatitis C virus NS5B RNA-dependent RNA polymerase	Hepatitis C virus	SINGLE PROTEIN	CHEMBL1148625	1	Scientific Literature	J. Med. Chem.	2006
CHEMBL380686		0	484.53	0	2.18	94	CC(C)CCn1c(=O)c(C2=NS(=O)(=O)c3ccccc3N2)c(O)c2cc(OCC(N)=O)ccc21	EC50	'='	511	nM	6.29			UO_0000065					FALSE	CHEMBL867030	Inhibition of HCV RNA replication in Huh7 cells	F	BAO_0000219	cell-based format	Hepatitis C virus			Huh-7		CHEMBL5375	Hepatitis C virus NS5B RNA-dependent RNA polymerase	Hepatitis C virus	SINGLE PROTEIN	CHEMBL1148625	1	Scientific Literature	J. Med. Chem.	2006	CHEMBL3307515
CHEMBL202595		0	484.58	0	3.11	97	CC(C)(C)CCn1c(=O)c(C2=NS(=O)(=O)c3ccccc3N2)c(O)c2cc(NCCO)ccc21	EC50	'='	370	nM	6.43			UO_0000065					FALSE	CHEMBL867030	Inhibition of HCV RNA replication in Huh7 cells	F	BAO_0000219	cell-based format	Hepatitis C virus			Huh-7		CHEMBL5375	Hepatitis C virus NS5B RNA-dependent RNA polymerase	Hepatitis C virus	SINGLE PROTEIN	CHEMBL1148625	1	Scientific Literature	J. Med. Chem.	2006	CHEMBL3307515
CHEMBL377075		0	417.45	0	3.26	54	O=c1c(C2=NS(=O)(=O)c3ccccc3N2)c(O)c2ccccc2n1-c1ccccc1	EC90	'='	1872	nM				UO_0000065					FALSE	CHEMBL867030	Inhibition of HCV RNA replication in Huh7 cells	F	BAO_0000219	cell-based format	Hepatitis C virus			Huh-7		CHEMBL5375	Hepatitis C virus NS5B RNA-dependent RNA polymerase	Hepatitis C virus	SINGLE PROTEIN	CHEMBL1148625	1	Scientific Literature	J. Med. Chem.	2006	CHEMBL3307515
CHEMBL380825		0	279.39	0	1.83	2a	CN(C)c1ccc(/C=C2\SC(=S)N(N)C2=O)cc1	IC50	'>'	30000	nM				UO_0000065					FALSE	CHEMBL864669	Inhibitory activity against HCV delta 21 NS5b RNA polymerase	B	BAO_0000357	single protein format	Hepatitis C virus					CHEMBL5375	Hepatitis C virus NS5B RNA-dependent RNA polymerase	Hepatitis C virus	SINGLE PROTEIN	CHEMBL1149391	1	Scientific Literature	J. Med. Chem.	2006
CHEMBL382504		0	236.32	0	1.76	2d	NN1C(=O)/C(=C/c2ccccc2)SC1=S	IC50	'>'	30000	nM				UO_0000065					FALSE	CHEMBL864669	Inhibitory activity against HCV delta 21 NS5b RNA polymerase	B	BAO_0000357	single protein format	Hepatitis C virus					CHEMBL5375	Hepatitis C virus NS5B RNA-dependent RNA polymerase	Hepatitis C virus	SINGLE PROTEIN	CHEMBL1149391	1	Scientific Literature	J. Med. Chem.	2006
CHEMBL202032		0	477.42	0	3.89	5bb	COc1cccc(S(=O)(=O)NN2C(=S)S/C(=C\c3ccc(Cl)c(Cl)c3)C2O)c1	IC50	'='	800	nM	6.1			UO_0000065	12.77	0.3	2.21	7.73	FALSE	CHEMBL864669	Inhibitory activity against HCV delta 21 NS5b RNA polymerase	B	BAO_0000357	single protein format	Hepatitis C virus					CHEMBL5375	Hepatitis C virus NS5B RNA-dependent RNA polymerase	Hepatitis C virus	SINGLE PROTEIN	CHEMBL1149391	1	Scientific Literature	J. Med. Chem.	2006
CHEMBL199809		0	430.45	0	3.2	5t	O=C1/C(=C/c2cc(F)c(F)c(F)c2)SC(=S)N1NS(=O)(=O)c1ccccc1	IC50	'='	1000	nM	6			UO_0000065	13.94	0.3	2.8	9.03	FALSE	CHEMBL864669	Inhibitory activity against HCV delta 21 NS5b RNA polymerase	B	BAO_0000357	single protein format	Hepatitis C virus					CHEMBL5375	Hepatitis C virus NS5B RNA-dependent RNA polymerase	Hepatitis C virus	SINGLE PROTEIN	CHEMBL1149391	1	Scientific Literature	J. Med. Chem.	2006
CHEMBL197761		0	420.49	0	2.51	5g	O=C1/C(=C/c2ccc3c(c2)OCO3)SC(=S)N1NS(=O)(=O)c1ccccc1	IC50	'='	15000	nM	4.82			UO_0000065	11.47	0.24	2.31	5.68	FALSE	CHEMBL864669	Inhibitory activity against HCV delta 21 NS5b RNA polymerase	B	BAO_0000357	single protein format	Hepatitis C virus					CHEMBL5375	Hepatitis C virus NS5B RNA-dependent RNA polymerase	Hepatitis C virus	SINGLE PROTEIN	CHEMBL1149391	1	Scientific Literature	J. Med. Chem.	2006
CHEMBL202987		0	391.4	0	3.96	128	O=c1c(-c2nc(O)c3ccccc3n2)c(O)c2cc(F)ccc2n1CCC1CC1	IC50	'>'	10000	nM				UO_0000065					FALSE	CHEMBL867029	Inhibitory activity against HCV delta 21 NS5B RNA polymerase by SPA assay	B	BAO_0000357	single protein format	Hepatitis C virus subtype 1b					CHEMBL5375	Hepatitis C virus NS5B RNA-dependent RNA polymerase	Hepatitis C virus	SINGLE PROTEIN	CHEMBL1148625	1	Scientific Literature	J. Med. Chem.	2006
CHEMBL381699		0	447.49	0	1.31	41	CS(=O)(=O)CCn1c(=O)c(C2=NS(=O)(=O)c3ccccc3N2)c(O)c2ccccc21	IC50	'='	2322	nM	5.63			UO_0000065	12.59	0.26	4.32	4.18	FALSE	CHEMBL867029	Inhibitory activity against HCV delta 21 NS5B RNA polymerase by SPA assay	B	BAO_0000357	single protein format	Hepatitis C virus subtype 1b					CHEMBL5375	Hepatitis C virus NS5B RNA-dependent RNA polymerase	Hepatitis C virus	SINGLE PROTEIN	CHEMBL1148625	1	Scientific Literature	J. Med. Chem.	2006
CHEMBL202165		0	465.45	0	3.86	31	CC(CCn1c(=O)c(C2=NS(=O)(=O)c3ccccc3N2)c(O)c2ccccc21)C(F)(F)F	IC50	'='	44	nM	7.36			UO_0000065	15.81	0.31	3.5	7.3	FALSE	CHEMBL867029	Inhibitory activity against HCV delta 21 NS5B RNA polymerase by SPA assay	B	BAO_0000357	single protein format	Hepatitis C virus subtype 1b					CHEMBL5375	Hepatitis C virus NS5B RNA-dependent RNA polymerase	Hepatitis C virus	SINGLE PROTEIN	CHEMBL1148625	1	Scientific Literature	J. Med. Chem.	2006
CHEMBL201769		0	425.51	0	3.62	83	Cc1ccc2c(c1)c(O)c(C1=NS(=O)(=O)c3ccccc3N1)c(=O)n2CCC(C)C	IC50	'='	47	nM	7.33			UO_0000065	17.22	0.33	3.71	7.27	FALSE	CHEMBL867029	Inhibitory activity against HCV delta 21 NS5B RNA polymerase by SPA assay	B	BAO_0000357	single protein format	Hepatitis C virus subtype 1b					CHEMBL5375	Hepatitis C virus NS5B RNA-dependent RNA polymerase	Hepatitis C virus	SINGLE PROTEIN	CHEMBL1148625	1	Scientific Literature	J. Med. Chem.	2006
CHEMBL202317		0	429.47	0	3.45	79	CC(C)CCn1c(=O)c(C2=NS(=O)(=O)c3ccccc3N2)c(O)c2cc(F)ccc21	IC50	'='	20	nM	7.7			UO_0000065	17.93	0.35	4.25	7.64	FALSE	CHEMBL867029	Inhibitory activity against HCV delta 21 NS5B RNA polymerase by SPA assay	B	BAO_0000357	single protein format	Hepatitis C virus subtype 1b					CHEMBL5375	Hepatitis C virus NS5B RNA-dependent RNA polymerase	Hepatitis C virus	SINGLE PROTEIN	CHEMBL1148625	1	Scientific Literature	J. Med. Chem.	2006
CHEMBL383170		0	427.46	0	3.21	110	O=c1c(C2=NS(=O)(=O)c3ccccc3N2)c(O)c2cccc(F)c2n1CCC1CC1	IC50	'='	90	nM	7.05			UO_0000065	16.48	0.32	3.84	6.99	FALSE	CHEMBL867029	Inhibitory activity against HCV delta 21 NS5B RNA polymerase by SPA assay	B	BAO_0000357	single protein format	Hepatitis C virus subtype 1b					CHEMBL5375	Hepatitis C virus NS5B RNA-dependent RNA polymerase	Hepatitis C virus	SINGLE PROTEIN	CHEMBL1148625	1	Scientific Literature	J. Med. Chem.	2006
CHEMBL201814		0	395.44	0	2.84	21	C=CCCn1c(=O)c(C2=NS(=O)(=O)c3ccccc3N2)c(O)c2ccccc21	IC50	'='	90	nM	7.05			UO_0000065	17.82	0.34	4.21	6.99	FALSE	CHEMBL867029	Inhibitory activity against HCV delta 21 NS5B RNA polymerase by SPA assay	B	BAO_0000357	single protein format	Hepatitis C virus subtype 1b					CHEMBL5375	Hepatitis C virus NS5B RNA-dependent RNA polymerase	Hepatitis C virus	SINGLE PROTEIN	CHEMBL1148625	1	Scientific Literature	J. Med. Chem.	2006
CHEMBL372357		0	427.46	0	3.02	130	O=c1c(C2=Nc3ccccc3S(=O)(=O)N2)c(O)c2cc(F)ccc2n1CCC1CC1	EC50	'='	38	nM	7.42			UO_0000065					FALSE	CHEMBL867030	Inhibition of HCV RNA replication in Huh7 cells	F	BAO_0000219	cell-based format	Hepatitis C virus			Huh-7		CHEMBL5375	Hepatitis C virus NS5B RNA-dependent RNA polymerase	Hepatitis C virus	SINGLE PROTEIN	CHEMBL1148625	1	Scientific Literature	J. Med. Chem.	2006	CHEMBL3307515
CHEMBL202261		0	490.38	0	4.08	105	CC(C)CCn1c(=O)c(C2=NS(=O)(=O)c3ccccc3N2)c(O)c2ccc(Br)cc21	IC50	'>'	10000	nM				UO_0000065					FALSE	CHEMBL867029	Inhibitory activity against HCV delta 21 NS5B RNA polymerase by SPA assay	B	BAO_0000357	single protein format	Hepatitis C virus subtype 1b					CHEMBL5375	Hepatitis C virus NS5B RNA-dependent RNA polymerase	Hepatitis C virus	SINGLE PROTEIN	CHEMBL1148625	1	Scientific Literature	J. Med. Chem.	2006
CHEMBL202005		0	530.61	1	4.57	102	CC(C)CCn1c(=O)c(C2=NS(=O)(=O)c3ccccc3N2)c(O)c2cc(NC(=O)c3ccccc3)ccc21	IC50	'='	4235	nM	5.37			UO_0000065	10.13	0.19	0.8	4.14	FALSE	CHEMBL867029	Inhibitory activity against HCV delta 21 NS5B RNA polymerase by SPA assay	B	BAO_0000357	single protein format	Hepatitis C virus subtype 1b					CHEMBL5375	Hepatitis C virus NS5B RNA-dependent RNA polymerase	Hepatitis C virus	SINGLE PROTEIN	CHEMBL1148625	1	Scientific Literature	J. Med. Chem.	2006
CHEMBL202595		0	484.58	0	3.11	97	CC(C)(C)CCn1c(=O)c(C2=NS(=O)(=O)c3ccccc3N2)c(O)c2cc(NCCO)ccc21	IC50	'='	48	nM	7.32			UO_0000065	15.1	0.29	4.21	5.5	FALSE	CHEMBL867029	Inhibitory activity against HCV delta 21 NS5B RNA polymerase by SPA assay	B	BAO_0000357	single protein format	Hepatitis C virus subtype 1b					CHEMBL5375	Hepatitis C virus NS5B RNA-dependent RNA polymerase	Hepatitis C virus	SINGLE PROTEIN	CHEMBL1148625	1	Scientific Literature	J. Med. Chem.	2006
CHEMBL174392		0	370.43	0	4.67	pg 123	O=C(O)c1ccc2c(c1)nc(-c1ccc(C(=O)O)s1)n2C1CCCCC1	IC50	'>'	30000	nM				UO_0000065					FALSE	CHEMBL750250	Inhibitory activity against NS5B polymerase of hepatitis C virus	B	BAO_0000357	single protein format	Hepatitis C virus					CHEMBL5375	Hepatitis C virus NS5B RNA-dependent RNA polymerase	Hepatitis C virus	SINGLE PROTEIN	CHEMBL1149223	1	Scientific Literature	Bioorg. Med. Chem. Lett.	2004
CHEMBL190558		0	394.47	0	4.74	52	CN(C)C(=O)Cn1c(-c2ccoc2)c(C2CCCCC2)c2ccc(C(=O)O)cc21	IC50	'='	31	nM	7.51			UO_0000065	19.03	0.35	2.77	9.92	FALSE	CHEMBL830123	Inhibitory activity against by hepatitis C virus NS5B polymerase	B	BAO_0000357	single protein format	Hepatitis C virus					CHEMBL5375	Hepatitis C virus NS5B RNA-dependent RNA polymerase	Hepatitis C virus	SINGLE PROTEIN	CHEMBL1140313	1	Scientific Literature	J. Med. Chem.	2005
CHEMBL190098		0	545.72	2	6.4	54	CCN(CC)C1CCN(C(=O)Cn2c(-c3ccc(OC)cc3)c(C3CCCCC3)c3ccc(C(=O)O)cc32)CC1	IC50	'='	9	nM	8.05			UO_0000065	14.74	0.27	1.65	10.73	FALSE	CHEMBL832625	Inhibitory activity against hepatitis C virus NS5B polymerase enzyme; Range=6-9 nM	B	BAO_0000357	single protein format	Hepatitis C virus					CHEMBL5375	Hepatitis C virus NS5B RNA-dependent RNA polymerase	Hepatitis C virus	SINGLE PROTEIN	CHEMBL1140313	1	Scientific Literature	J. Med. Chem.	2005
CHEMBL1161753		0	507.23	3	-1.88	4a	Nc1ncnc2c1ncn2[C@@H]1C[C@H](OCP(=O)(O)OP(=O)(O)O[PH](O)(O)O)[C@@H](O)[C@H]1O	Ki	'='	229000	nM		Outside typical range		UO_0000065					FALSE	CHEMBL828787	Inhibition constant against ATP binding towards Hepatitis C Virus NS5BRdRp	F	BAO_0000019	assay format	Hepatitis C virus					CHEMBL5375	Hepatitis C virus NS5B RNA-dependent RNA polymerase	Hepatitis C virus	SINGLE PROTEIN	CHEMBL1143599	1	Scientific Literature	J. Med. Chem.	2005
CHEMBL362957		0	489.62	1	5.34	56	O=C(O)c1ccc2c(C3CCCCC3)c(-c3ccoc3)n(CC(=O)N3CCC(N4CCC4)CC3)c2c1	IC50	'='	9	nM	8.05			UO_0000065	16.43	0.31	2.71	10.19	FALSE	CHEMBL832625	Inhibitory activity against hepatitis C virus NS5B polymerase enzyme; Range=6-9 nM	B	BAO_0000357	single protein format	Hepatitis C virus					CHEMBL5375	Hepatitis C virus NS5B RNA-dependent RNA polymerase	Hepatitis C virus	SINGLE PROTEIN	CHEMBL1140313	1	Scientific Literature	J. Med. Chem.	2005
CHEMBL192821		0	474.26	1	5.38	34 (table 1)	O=C(O)/C(=C/c1ccc(Oc2ccccc2Br)cc1)NC(=O)c1ccc(F)cc1F	ED50	'>'	100	uM		Non standard unit for type		UO_0000064					FALSE	CHEMBL832552	Effective dose for RNA dependent RNA polymerase Nonstructural protein 5B (HCV NS5B polymerase) in Hepatitis C virus	B	BAO_0000357	single protein format	Hepatitis C virus					CHEMBL5375	Hepatitis C virus NS5B RNA-dependent RNA polymerase	Hepatitis C virus	SINGLE PROTEIN	CHEMBL1145278	1	Scientific Literature	Bioorg. Med. Chem. Lett.	2005
CHEMBL189927		0	456.27	1	5.24	33 (table 1)	O=C(O)/C(=C/c1ccc(Oc2ccccc2Br)cc1)NC(=O)c1ccccc1F	CC50	'>'	100000	nM				UO_0000065					FALSE	CHEMBL839075	Cytotoxic concentration against RNA dependent RNA polymerase Nonstructural protein 5B (HCV NS5B polymerase) in Hepatitis C virus	B	BAO_0000357	single protein format	Hepatitis C virus					CHEMBL5375	Hepatitis C virus NS5B RNA-dependent RNA polymerase	Hepatitis C virus	SINGLE PROTEIN	CHEMBL1145278	1	Scientific Literature	Bioorg. Med. Chem. Lett.	2005
CHEMBL192842		0	505.35	2	5.6	51 (table 2)	O=C(CCC1CCCC1)N/C(=C\c1ccc(Oc2ccccc2I)cc1)C(=O)O	Ratio	'='	2										FALSE	CHEMBL831764	Ratio for cellular to RNA dependent RNA polymerase Nonstructural protein 5B activity in Hepatitis C virus	B	BAO_0000357	single protein format	Hepatitis C virus					CHEMBL5375	Hepatitis C virus NS5B RNA-dependent RNA polymerase	Hepatitis C virus	SINGLE PROTEIN	CHEMBL1145278	1	Scientific Literature	Bioorg. Med. Chem. Lett.	2005
CHEMBL366197		0	456.27	1	5.24	73	O=C(O)/C(=C/c1ccc(Oc2c(F)cccc2Br)cc1)NC(=O)c1ccccc1	IC50	'='	30	nM	7.52			UO_0000065	16.49	0.35	2.28	9.95	TRUE	CHEMBL832697	Inhibitory concentration against Hepatitis C virus NS5B polymerase	B	BAO_0000357	single protein format	Hepatitis C virus					CHEMBL5375	Hepatitis C virus NS5B RNA-dependent RNA polymerase	Hepatitis C virus	SINGLE PROTEIN	CHEMBL1140265	1	Scientific Literature	Bioorg. Med. Chem. Lett.	2005
CHEMBL192108		0	412.42	0	2.45	57	NS(=O)(=O)c1ccc(-c2ccc(/C=C(\NC(=O)c3ccccc3)C(=O)O)o2)cc1	IC50	'>'	100000	nM				UO_0000065					FALSE	CHEMBL832697	Inhibitory concentration against Hepatitis C virus NS5B polymerase	B	BAO_0000357	single protein format	Hepatitis C virus					CHEMBL5375	Hepatitis C virus NS5B RNA-dependent RNA polymerase	Hepatitis C virus	SINGLE PROTEIN	CHEMBL1140265	1	Scientific Literature	Bioorg. Med. Chem. Lett.	2005
CHEMBL195149		0	467.32	0	4.69	27 (table 4)	CONC(=O)/C(=C/c1ccc(Oc2ccccc2Br)cc1)NC(=O)c1ccccc1	CC50	'='	22000	nM				UO_0000065					FALSE	CHEMBL839075	Cytotoxic concentration against RNA dependent RNA polymerase Nonstructural protein 5B (HCV NS5B polymerase) in Hepatitis C virus	B	BAO_0000357	single protein format	Hepatitis C virus					CHEMBL5375	Hepatitis C virus NS5B RNA-dependent RNA polymerase	Hepatitis C virus	SINGLE PROTEIN	CHEMBL1145278	1	Scientific Literature	Bioorg. Med. Chem. Lett.	2005
CHEMBL323046		0	214.17	0	0.58	9	CCOCc1cc(=O)c(O)c(C(=O)O)o1	IC50	'='	800	nM	6.1			UO_0000065	28.47	0.56	5.52	6.29	FALSE	CHEMBL750255	Inhibitory potency of compound in presence of Mn2+ ion against NS5B HCV polymerase	B	BAO_0000357	single protein format	Hepatitis C virus					CHEMBL5375	Hepatitis C virus NS5B RNA-dependent RNA polymerase	Hepatitis C virus	SINGLE PROTEIN	CHEMBL1146656	1	Scientific Literature	Bioorg. Med. Chem. Lett.	2004
CHEMBL195565		0	378.34	0	3.71	53	O=C(O)/C(=C/c1ccc(-c2ccc([N+](=O)[O-])cc2)o1)NC(=O)c1ccccc1	IC50	'>'	100000	nM				UO_0000065					FALSE	CHEMBL832697	Inhibitory concentration against Hepatitis C virus NS5B polymerase	B	BAO_0000357	single protein format	Hepatitis C virus					CHEMBL5375	Hepatitis C virus NS5B RNA-dependent RNA polymerase	Hepatitis C virus	SINGLE PROTEIN	CHEMBL1140265	1	Scientific Literature	Bioorg. Med. Chem. Lett.	2005
CHEMBL359981		0	262.22	0	0.56	11	Cn1c(-c2cccc(O)c2)nc(C(=O)O)c(O)c1=O	IC50	'='	6000	nM	5.22			UO_0000065	19.91	0.38	4.66	4.64	FALSE	CHEMBL831435	Inhibitory concentration required to inhibit HCV RNA dependent RNA polymerase Nonstructural protein 5B in the presence of Mg2+ is determined	B	BAO_0000357	single protein format	Hepatitis C virus					CHEMBL5375	Hepatitis C virus NS5B RNA-dependent RNA polymerase	Hepatitis C virus	SINGLE PROTEIN	CHEMBL1138789	1	Scientific Literature	J. Med. Chem.	2004
CHEMBL211710		0	448.46	0	2.42	7	O=c1c(C2=NS(=O)(=O)c3ccc(O)cc3N2)c(O)c2cccnc2n1Cc1ccccc1	IC50	'='	2510	nM	5.6			UO_0000065	12.49	0.24	3.18	4.18	FALSE	CHEMBL871397	Inhibition of HCV 1b NS5B RNA polymerase	B	BAO_0000357	single protein format	Hepatitis C virus subtype 1b					CHEMBL5375	Hepatitis C virus NS5B RNA-dependent RNA polymerase	Hepatitis C virus	SINGLE PROTEIN	CHEMBL1138030	1	Scientific Literature	Bioorg. Med. Chem. Lett.	2006
CHEMBL426866		0	471.54	0	2.05	22	CC(C)CCn1c(=O)c(C2=NS(=O)(=O)c3cc(OCCN)ccc3N2)c(O)c2cccnc21	IC50	'='	637	nM	6.2			UO_0000065	13.14	0.26	4.15	4.16	FALSE	CHEMBL871399	Inhibition of HCV 1a NS5B RNA polymerase	B	BAO_0000357	single protein format	Hepatitis C virus subtype 1a					CHEMBL5375	Hepatitis C virus NS5B RNA-dependent RNA polymerase	Hepatitis C virus	SINGLE PROTEIN	CHEMBL1138030	1	Scientific Literature	Bioorg. Med. Chem. Lett.	2006
CHEMBL207252		0	298.32	0	3.33	35	C=CCC1(C(=O)O)CCc2c1[nH]c1c(C)cc(F)c(C#N)c21	IC50	'='	6300	nM	5.2			UO_0000065	17.43	0.32	1.87	6.76	FALSE	CHEMBL870070	Inhibition of HCV 1b BK NS5B RNA polymerase	B	BAO_0000357	single protein format	Hepatitis C virus (isolate BK)					CHEMBL5375	Hepatitis C virus NS5B RNA-dependent RNA polymerase	Hepatitis C virus	SINGLE PROTEIN	CHEMBL1147645	1	Scientific Literature	Bioorg. Med. Chem. Lett.	2006
CHEMBL214015		0	470.55	0	3.31	15	CCCOc1ccc2c(c1)S(=O)(=O)NC(c1c(O)c3cccnc3n(CCC(C)C)c1=O)=N2	IC50	'='	930	nM	6.03			UO_0000065	12.82	0.25	2.72	4.91	FALSE	CHEMBL871397	Inhibition of HCV 1b NS5B RNA polymerase	B	BAO_0000357	single protein format	Hepatitis C virus subtype 1b					CHEMBL5375	Hepatitis C virus NS5B RNA-dependent RNA polymerase	Hepatitis C virus	SINGLE PROTEIN	CHEMBL1138030	1	Scientific Literature	Bioorg. Med. Chem. Lett.	2006
CHEMBL210158		0	505.58	1	2.08	31	CC(C)CCn1c(=O)c(C2=NS(=O)(=O)c3cc(NS(C)(=O)=O)ccc3N2)c(O)c2cccnc21	IC50	'='	2	nM	8.7			UO_0000065	17.21	0.35	6.62	5.44	FALSE	CHEMBL871399	Inhibition of HCV 1a NS5B RNA polymerase	B	BAO_0000357	single protein format	Hepatitis C virus subtype 1a					CHEMBL5375	Hepatitis C virus NS5B RNA-dependent RNA polymerase	Hepatitis C virus	SINGLE PROTEIN	CHEMBL1138030	1	Scientific Literature	Bioorg. Med. Chem. Lett.	2006
CHEMBL305890		0	296.29	0	-2.01	40	C[C@@]1(O)[C@H](O)[C@@H](CO)O[C@H]1n1cnc2c(N)nc(N)nc21	EC50	'='	7000	nM	5.16			UO_0000065					FALSE	CHEMBL691888	Inhibition HCV RNA replication	F	BAO_0000019	assay format	Hepatitis C virus					CHEMBL5375	Hepatitis C virus NS5B RNA-dependent RNA polymerase	Hepatitis C virus	SINGLE PROTEIN	CHEMBL1149159	1	Scientific Literature	J. Med. Chem.	2004
CHEMBL480143		0	281.27	0	-1.59	23	C[C@@]1(O)[C@@H](CO)O[C@@H](n2cnc3c(N)ncnc32)[C@@H]1O	IC50	'>'	50000	nM				UO_0000065					FALSE	CHEMBL691889	Inhibition HCV NS5B-mediated RNA synthesis	F	BAO_0000019	assay format	Hepatitis C virus					CHEMBL5375	Hepatitis C virus NS5B RNA-dependent RNA polymerase	Hepatitis C virus	SINGLE PROTEIN	CHEMBL1149159	1	Scientific Literature	J. Med. Chem.	2004
CHEMBL72928		0	269.24	0	-1	3	Nc1ncnc2c1ncn2[C@@H]1O[C@H](CO)[C@@H](F)[C@H]1O	IC50	'='	28000	nM	4.55			UO_0000065					FALSE	CHEMBL691889	Inhibition HCV NS5B-mediated RNA synthesis	F	BAO_0000019	assay format	Hepatitis C virus					CHEMBL5375	Hepatitis C virus NS5B RNA-dependent RNA polymerase	Hepatitis C virus	SINGLE PROTEIN	CHEMBL1149159	1	Scientific Literature	J. Med. Chem.	2004
CHEMBL308759		0	285.24	0	-1.3	8	Nc1nc(O)c2ncn([C@@H]3O[C@H](CO)[C@@H](O)[C@H]3F)c2n1	EC50	'>'	50000	nM				UO_0000065					FALSE	CHEMBL691888	Inhibition HCV RNA replication	F	BAO_0000019	assay format	Hepatitis C virus					CHEMBL5375	Hepatitis C virus NS5B RNA-dependent RNA polymerase	Hepatitis C virus	SINGLE PROTEIN	CHEMBL1149159	1	Scientific Literature	J. Med. Chem.	2004
CHEMBL175173		0	334.42	0	3.96	5	CNC(=O)c1ccc2c(c1)nc(-c1ccccn1)n2C1CCCCC1	IC50	'='	28000	nM	4.55			UO_0000065	13.61	0.25	0.59	7.61	FALSE	CHEMBL750250	Inhibitory activity against NS5B polymerase of hepatitis C virus	B	BAO_0000357	single protein format	Hepatitis C virus					CHEMBL5375	Hepatitis C virus NS5B RNA-dependent RNA polymerase	Hepatitis C virus	SINGLE PROTEIN	CHEMBL1149223	1	Scientific Literature	Bioorg. Med. Chem. Lett.	2004
CHEMBL177345		0	386.46	1	5.3	pg 123	O=C(O)c1ccc2c(c1)nc(-c1c[nH]nc1-c1ccccc1)n2C1CCCCC1	IC50	'>'	30000	nM				UO_0000065					FALSE	CHEMBL750250	Inhibitory activity against NS5B polymerase of hepatitis C virus	B	BAO_0000357	single protein format	Hepatitis C virus					CHEMBL5375	Hepatitis C virus NS5B RNA-dependent RNA polymerase	Hepatitis C virus	SINGLE PROTEIN	CHEMBL1149223	1	Scientific Literature	Bioorg. Med. Chem. Lett.	2004
CHEMBL75667		0	281.27	0	-1.59	19	C[C@]1(O)[C@H](O)[C@@H](CO)O[C@H]1n1cnc2c(N)ncnc21	IC50	'>'	50000	nM				UO_0000065					FALSE	CHEMBL691889	Inhibition HCV NS5B-mediated RNA synthesis	F	BAO_0000019	assay format	Hepatitis C virus					CHEMBL5375	Hepatitis C virus NS5B RNA-dependent RNA polymerase	Hepatitis C virus	SINGLE PROTEIN	CHEMBL1149159	1	Scientific Literature	J. Med. Chem.	2004
CHEMBL174629		0	326.42	0	4.97	34	O=C(O)c1ccc2c(c1)nc(-c1cccs1)n2C1CCCCC1	IC50	'='	3400	nM	5.47			UO_0000065	16.75	0.32	0.5	9.92	FALSE	CHEMBL750250	Inhibitory activity against NS5B polymerase of hepatitis C virus	B	BAO_0000357	single protein format	Hepatitis C virus					CHEMBL5375	Hepatitis C virus NS5B RNA-dependent RNA polymerase	Hepatitis C virus	SINGLE PROTEIN	CHEMBL1149223	1	Scientific Literature	Bioorg. Med. Chem. Lett.	2004
[truncated: 2,145 more rows]
