# Supplementary material for: Identification of Potential Key Agents for Targeting RNA-Dependent RNA Polymerase of SARS-CoV-2 by Integrated Analysis and Virtual Drug Screening
Source: Front Genet. 2020 Nov 17;11:581668. doi: 10.3389/fgene.2020.581668 (PMC7705243; doi:10.3389/fgene.2020.581668)
Supplement: Supplementary Table 4 — List of unique virus-targeting agents with potential repurposing for SARS-CoV-2 RdRp. [file Table_4.XLSX]

## Sheet: 1 RdRp-seq174
BindingDB Reactant_set_id	Ligand SMILES	Ligand InChI	Ligand InChI Key	BindingDB MonomerID	BindingDB Ligand Name	Target Name Assigned by Curator or DataSource	Target Source Organism According to Curator or DataSource	Ki (nM)	IC50 (nM)	Kd (nM)	EC50 (nM)	kon (M-1-s-1)	koff (s-1)	pH	Temp (C)	Curation/DataSource	Article DOI	PMID	PubChem AID	Patent Number	Authors	Institution	Link to Ligand in BindingDB	Link to Target in BindingDB	Link to Ligand-Target Pair in BindingDB	Ligand HET ID in PDB	PDB ID(s) for Ligand-Target Complex	PubChem CID	PubChem SID	ChEBI ID of Ligand	ChEMBL ID of Ligand	DrugBank ID of Ligand	IUPHAR_GRAC ID of Ligand	KEGG ID of Ligand	ZINC ID of Ligand	Number of Protein Chains in Target (>1 implies a multichain complex)	BindingDB Target Chain Sequence	PDB ID(s) of Target Chain	UniProt (SwissProt) Recommended Name of Target Chain	UniProt (SwissProt) Entry Name of Target Chain	UniProt (SwissProt) Primary ID of Target Chain	UniProt (SwissProt) Secondary ID(s) of Target Chain	UniProt (SwissProt) Alternative ID(s) of Target Chain	UniProt (TrEMBL) Submitted Name of Target Chain	UniProt (TrEMBL) Entry Name of Target Chain	UniProt (TrEMBL) Primary ID of Target Chain	UniProt (TrEMBL) Secondary ID(s) of Target Chain	UniProt (TrEMBL) Alternative ID(s) of Target Chain
19474	CCOC(=O)\C=C\[C@H](C[C@@H]1CCNC1=O)NC(=O)[C@H](Cc1ccc(F)cc1)NC(=O)[C@@H](NC(=O)c1cc(C)on1)C(C)C	InChI=1/C30H38FN5O7/c1-5-42-25(37)11-10-22(16-20-12-13-32-27(20)38)33-28(39)23(15-19-6-8-21(31)9-7-19)34-30(41)26(17(2)3)35-29(40)24-14-18(4)43-36-24/h6-11,14,17,20,22-23,26H,5,12-13,15-16H2,1-4H3,(H,32,38)(H,33,39)(H,34,41)(H,35,40)/b11-10+/t20-,22+,23-,26-/s2	JSJRYDPMCHPLOL-MYLHEQDVNA-N	11229	AG7088 analogue 2a::CHEMBL20636::N-[(5-methylisoxazol-3-yl)carbonyl]-L-valyl-N-((1S,2E)-4-ethoxy-4-oxo-1-{[(3S)-2-oxopyrrolidin-3-yl]methyl}but-2-enyl)-4-fluoro-L-phenylalaninamide::TG-0205221 Analogue 1::ethyl (2E,4S)-4-[(2S)-3-(4-fluorophenyl)-2-[(2S)-3-methyl-2-[(5-methyl-1,2-oxazol-3-yl)formamido]butanamido]propanamido]-5-[(3S)-2-oxopyrrolidin-3-yl]pent-2-enoate	3C-like proteinase (3CL-PRO)	Human SARS coronavirus	>10000						7.5	25.00 C	Curated from the literature by BindingDB	10.1021/jm0603926	16884309			Yang, S; Chen, SJ; Hsu, MF; Wu, JD; Tseng, CT; Liu, YF; Chen, HC; Kuo, CW; Wu, CS; Chang, LW; Chen, WC; Liao, SY; Chang, TY; Hung, HH; Shr, HL; Liu, CY; Huang, YA; Chang, LY; Hsu, JC; Peters, CJ; Wang, AH; Hsu, MC	TaiGen Biotechnology Co.	http://www.bindingdb.org/bind/chemsearch/marvin/MolStructure.jsp?monomerid=11229	http://www.bindingdb.org/jsp/dbsearch/PrimarySearch_ki.jsp?energyterm=kJ/mole&tag=pol&polymerid=4753&target=3C-like+proteinase+%283CL-PRO%29&column=ki&startPg=0&Increment=50&submit=Search	http://www.bindingdb.org/jsp/dbsearch/PrimarySearch_ki.jsp?energyterm=kJ/mole&tag=r21&monomerid=11229&enzyme=3C-like+proteinase+%283CL-PRO%29&column=ki&startPg=0&Increment=50&submit=Search			6476897	46511782		CHEMBL20636				ZINC14947852	1	MESLVLGVNEKTHVQLSLPVLQVRDVLVRGFGDSVEEALSEAREHLKNGTCGLVELEKGVLPQLEQPYVFIKRSDALSTNHGHKVVELVAEMDGIQYGRSGITLGVLVPHVGETPIAYRNVLLRKNGNKGAGGHSYGIDLKSYDLGDELGTDPIEDYEQNWNTKHGSGALRELTRELNGGAVTRYVDNNFCGPDGYPLDCIKDFLARAGKSMCTLSEQLDYIESKRGVYCCRDHEHEIAWFTERSDKSYEHQTPFEIKSAKKFDTFKGECPKFVFPLNSKVKVIQPRVEKKKTEGFMGRIRSVYPVASPQECNNMHLSTLMKCNHCDEVSWQTCDFLKATCEHCGTENLVIEGPTTCGYLPTNAVVKMPCPACQDPEIGPEHSVADYHNHSNIETRLRK…	1Q2W,1QZ8,1UJ1,1UK2,1UK3,1UK4,1UW7,1WOF,1Z1I,2A5A,2A5I,2A5K,2ACF,2AHM,2ALV,2AMD,2AMQ,2BX3,2BX4,2C3S,2D2D,2DUC,2FAV,2FE8,2FYG,2G9T,2GA6,2GDT,2GRI,2GT7,2GT8,2GTB,2GX4,2GZ7,2GZ8,2GZ9,2H2Z,2HOB,2HSX,2IDY,2JZF,2K7X,2K87,2KAF,2LIZ,2OP9,2OZK,2RNK,2V6N,2VJ1,2XYQ,2XYR,2XYV,2Z3C,2Z3D,2Z3E,2Z94,2Z9G,2Z9J,2Z9K,2Z9L,2ZU4,2ZU5,3D62,3E91,3E9S,3EA7,3EA8,3EBN,3IWM,3M3V,3MJ5,3R24,3SN8,3SNA,3SNB,3SNC,3SND,3SNE,3SZN…	Replicase polyprotein 1ab	R1AB_CVHSA	P0C6X7	P59641,Q6WGN0,Q7T697,Q808C0,Q80BV7,Q80BV8,Q80E51
19475	CCOC(=O)\C=C\[C@H](C[C@@H]1CCNC1=O)NC(=O)[C@H](Cc1ccccc1)NC(=O)[C@@H](NC(=O)OCc1ccccc1)C(C)C	InChI=1/C33H42N4O7/c1-4-43-28(38)16-15-26(20-25-17-18-34-30(25)39)35-31(40)27(19-23-11-7-5-8-12-23)36-32(41)29(22(2)3)37-33(42)44-21-24-13-9-6-10-14-24/h5-16,22,25-27,29H,4,17-21H2,1-3H3,(H,34,39)(H,35,40)(H,36,41)(H,37,42)/b16-15+/t25-,26+,27-,29-/s2	MQOSRSSZYUXZNH-VRMPVSCUNA-N	11230	AG7088 analogue 2d::CHEMBL277716::N-[(benzyloxy)carbonyl]-L-valyl-N-((1S,2E)-4-ethoxy-4-oxo-1-{[(3S)-2-oxopyrrolidin-3-yl]methyl}but-2-enyl)-L-phenylalaninamide::TG-0205221 Analogue 2::ethyl (2E,4S)-4-[(2S)-2-[(2S)-2-{[(benzyloxy)carbonyl]amino}-3-methylbutanamido]-3-phenylpropanamido]-5-[(3S)-2-oxopyrrolidin-3-yl]pent-2-enoate	3C-like proteinase (3CL-PRO)	Human SARS coronavirus	2260						7.5	25.00 C	Curated from the literature by BindingDB	10.1021/jm0603926	16884309			Yang, S; Chen, SJ; Hsu, MF; Wu, JD; Tseng, CT; Liu, YF; Chen, HC; Kuo, CW; Wu, CS; Chang, LW; Chen, WC; Liao, SY; Chang, TY; Hung, HH; Shr, HL; Liu, CY; Huang, YA; Chang, LY; Hsu, JC; Peters, CJ; Wang, AH; Hsu, MC	TaiGen Biotechnology Co.	http://www.bindingdb.org/bind/chemsearch/marvin/MolStructure.jsp?monomerid=11230	http://www.bindingdb.org/jsp/dbsearch/PrimarySearch_ki.jsp?energyterm=kJ/mole&tag=pol&polymerid=4753&target=3C-like+proteinase+%283CL-PRO%29&column=ki&startPg=0&Increment=50&submit=Search	http://www.bindingdb.org/jsp/dbsearch/PrimarySearch_ki.jsp?energyterm=kJ/mole&tag=r21&monomerid=11230&enzyme=3C-like+proteinase+%283CL-PRO%29&column=ki&startPg=0&Increment=50&submit=Search			6478229	46511783		CHEMBL277716				ZINC14947855	1	MESLVLGVNEKTHVQLSLPVLQVRDVLVRGFGDSVEEALSEAREHLKNGTCGLVELEKGVLPQLEQPYVFIKRSDALSTNHGHKVVELVAEMDGIQYGRSGITLGVLVPHVGETPIAYRNVLLRKNGNKGAGGHSYGIDLKSYDLGDELGTDPIEDYEQNWNTKHGSGALRELTRELNGGAVTRYVDNNFCGPDGYPLDCIKDFLARAGKSMCTLSEQLDYIESKRGVYCCRDHEHEIAWFTERSDKSYEHQTPFEIKSAKKFDTFKGECPKFVFPLNSKVKVIQPRVEKKKTEGFMGRIRSVYPVASPQECNNMHLSTLMKCNHCDEVSWQTCDFLKATCEHCGTENLVIEGPTTCGYLPTNAVVKMPCPACQDPEIGPEHSVADYHNHSNIETRLRK…	1Q2W,1QZ8,1UJ1,1UK2,1UK3,1UK4,1UW7,1WOF,1Z1I,2A5A,2A5I,2A5K,2ACF,2AHM,2ALV,2AMD,2AMQ,2BX3,2BX4,2C3S,2D2D,2DUC,2FAV,2FE8,2FYG,2G9T,2GA6,2GDT,2GRI,2GT7,2GT8,2GTB,2GX4,2GZ7,2GZ8,2GZ9,2H2Z,2HOB,2HSX,2IDY,2JZF,2K7X,2K87,2KAF,2LIZ,2OP9,2OZK,2RNK,2V6N,2VJ1,2XYQ,2XYR,2XYV,2Z3C,2Z3D,2Z3E,2Z94,2Z9G,2Z9J,2Z9K,2Z9L,2ZU4,2ZU5,3D62,3E91,3E9S,3EA7,3EA8,3EBN,3IWM,3M3V,3MJ5,3R24,3SN8,3SNA,3SNB,3SNC,3SND,3SNE,3SZN…	Replicase polyprotein 1ab	R1AB_CVHSA	P0C6X7	P59641,Q6WGN0,Q7T697,Q808C0,Q80BV7,Q80BV8,Q80E51
19476	CCOC(=O)\C=C\[C@H](C[C@@H]1CCNC1=O)NC(=O)[C@H](CC(C)C)NC(=O)[C@@H](NC(=O)OCc1ccccc1)C(C)C	InChI=1/C30H44N4O7/c1-6-40-25(35)13-12-23(17-22-14-15-31-27(22)36)32-28(37)24(16-19(2)3)33-29(38)26(20(4)5)34-30(39)41-18-21-10-8-7-9-11-21/h7-13,19-20,22-24,26H,6,14-18H2,1-5H3,(H,31,36)(H,32,37)(H,33,38)(H,34,39)/b13-12+/t22-,23+,24-,26-/s2	WDMSWWUPIMEGNZ-KWJHIQPVNA-N	11231	N-[(benzyloxy)carbonyl]-L-valyl-N1-((1S,2E)-4-ethoxy-4-oxo-1-{[(3S)-2-oxopyrrolidin-3-yl]methyl}but-2-enyl)-L-leucinamide::TG-0205221 Analogue 3::ethyl (2E,4S)-4-[(2S)-2-[(2S)-2-{[(benzyloxy)carbonyl]amino}-3-methylbutanamido]-4-methylpentanamido]-5-[(3S)-2-oxopyrrolidin-3-yl]pent-2-enoate	3C-like proteinase (3CL-PRO)	Human SARS coronavirus	660						7.5	25.00 C	Curated from the literature by BindingDB	10.1021/jm0603926	16884309			Yang, S; Chen, SJ; Hsu, MF; Wu, JD; Tseng, CT; Liu, YF; Chen, HC; Kuo, CW; Wu, CS; Chang, LW; Chen, WC; Liao, SY; Chang, TY; Hung, HH; Shr, HL; Liu, CY; Huang, YA; Chang, LY; Hsu, JC; Peters, CJ; Wang, AH; Hsu, MC	TaiGen Biotechnology Co.	http://www.bindingdb.org/bind/chemsearch/marvin/MolStructure.jsp?monomerid=11231	http://www.bindingdb.org/jsp/dbsearch/PrimarySearch_ki.jsp?energyterm=kJ/mole&tag=pol&polymerid=4753&target=3C-like+proteinase+%283CL-PRO%29&column=ki&startPg=0&Increment=50&submit=Search	http://www.bindingdb.org/jsp/dbsearch/PrimarySearch_ki.jsp?energyterm=kJ/mole&tag=r21&monomerid=11231&enzyme=3C-like+proteinase+%283CL-PRO%29&column=ki&startPg=0&Increment=50&submit=Search			11444522	46511784						ZINC14947858	1	MESLVLGVNEKTHVQLSLPVLQVRDVLVRGFGDSVEEALSEAREHLKNGTCGLVELEKGVLPQLEQPYVFIKRSDALSTNHGHKVVELVAEMDGIQYGRSGITLGVLVPHVGETPIAYRNVLLRKNGNKGAGGHSYGIDLKSYDLGDELGTDPIEDYEQNWNTKHGSGALRELTRELNGGAVTRYVDNNFCGPDGYPLDCIKDFLARAGKSMCTLSEQLDYIESKRGVYCCRDHEHEIAWFTERSDKSYEHQTPFEIKSAKKFDTFKGECPKFVFPLNSKVKVIQPRVEKKKTEGFMGRIRSVYPVASPQECNNMHLSTLMKCNHCDEVSWQTCDFLKATCEHCGTENLVIEGPTTCGYLPTNAVVKMPCPACQDPEIGPEHSVADYHNHSNIETRLRK…	1Q2W,1QZ8,1UJ1,1UK2,1UK3,1UK4,1UW7,1WOF,1Z1I,2A5A,2A5I,2A5K,2ACF,2AHM,2ALV,2AMD,2AMQ,2BX3,2BX4,2C3S,2D2D,2DUC,2FAV,2FE8,2FYG,2G9T,2GA6,2GDT,2GRI,2GT7,2GT8,2GTB,2GX4,2GZ7,2GZ8,2GZ9,2H2Z,2HOB,2HSX,2IDY,2JZF,2K7X,2K87,2KAF,2LIZ,2OP9,2OZK,2RNK,2V6N,2VJ1,2XYQ,2XYR,2XYV,2Z3C,2Z3D,2Z3E,2Z94,2Z9G,2Z9J,2Z9K,2Z9L,2ZU4,2ZU5,3D62,3E91,3E9S,3EA7,3EA8,3EBN,3IWM,3M3V,3MJ5,3R24,3SN8,3SNA,3SNB,3SNC,3SND,3SNE,3SZN…	Replicase polyprotein 1ab	R1AB_CVHSA	P0C6X7	P59641,Q6WGN0,Q7T697,Q808C0,Q80BV7,Q80BV8,Q80E51
19477	CCOC(=O)\C=C\[C@H](C[C@@H]1CCNC1=O)NC(=O)[C@H](CC(C)C)NC(=O)[C@@H](NC(=O)OCc1ccccc1)C(C)OC(C)(C)C	InChI=1/C33H50N4O8/c1-8-43-27(38)15-14-25(19-24-16-17-34-29(24)39)35-30(40)26(18-21(2)3)36-31(41)28(22(4)45-33(5,6)7)37-32(42)44-20-23-12-10-9-11-13-23/h9-15,21-22,24-26,28H,8,16-20H2,1-7H3,(H,34,39)(H,35,40)(H,36,41)(H,37,42)/b15-14+/t22?,24-,25+,26-,28-/s2	PWBQMVUCCVWDEJ-YVGOWGDBNA-N	11232	N-[(benzyloxy)carbonyl]-O-(tert-butyl)-L-threonyl-N1-((1S,2E)-4-ethoxy-4-oxo-1-{[(3S)-2-oxopyrrolidin-3-yl]methyl}but-2-enyl)-L-leucinamide::TG-0203770::TG-0205221 Analogue 4::ethyl (2E,4S)-4-[(2S)-2-[(2S,3S)-2-{[(benzyloxy)carbonyl]amino}-3-(tert-butoxy)butanamido]-4-methylpentanamido]-5-[(3S)-2-oxopyrrolidin-3-yl]pent-2-enoate	3C-like proteinase (3CL-PRO)	Human SARS coronavirus	58						7.5	25.00 C	Curated from the literature by BindingDB	10.1021/jm0603926	16884309			Yang, S; Chen, SJ; Hsu, MF; Wu, JD; Tseng, CT; Liu, YF; Chen, HC; Kuo, CW; Wu, CS; Chang, LW; Chen, WC; Liao, SY; Chang, TY; Hung, HH; Shr, HL; Liu, CY; Huang, YA; Chang, LY; Hsu, JC; Peters, CJ; Wang, AH; Hsu, MC	TaiGen Biotechnology Co.	http://www.bindingdb.org/bind/chemsearch/marvin/MolStructure.jsp?monomerid=11232	http://www.bindingdb.org/jsp/dbsearch/PrimarySearch_ki.jsp?energyterm=kJ/mole&tag=pol&polymerid=4753&target=3C-like+proteinase+%283CL-PRO%29&column=ki&startPg=0&Increment=50&submit=Search	http://www.bindingdb.org/jsp/dbsearch/PrimarySearch_ki.jsp?energyterm=kJ/mole&tag=r21&monomerid=11232&enzyme=3C-like+proteinase+%283CL-PRO%29&column=ki&startPg=0&Increment=50&submit=Search			11786957	46509355						ZINC14947865	1	MESLVLGVNEKTHVQLSLPVLQVRDVLVRGFGDSVEEALSEAREHLKNGTCGLVELEKGVLPQLEQPYVFIKRSDALSTNHGHKVVELVAEMDGIQYGRSGITLGVLVPHVGETPIAYRNVLLRKNGNKGAGGHSYGIDLKSYDLGDELGTDPIEDYEQNWNTKHGSGALRELTRELNGGAVTRYVDNNFCGPDGYPLDCIKDFLARAGKSMCTLSEQLDYIESKRGVYCCRDHEHEIAWFTERSDKSYEHQTPFEIKSAKKFDTFKGECPKFVFPLNSKVKVIQPRVEKKKTEGFMGRIRSVYPVASPQECNNMHLSTLMKCNHCDEVSWQTCDFLKATCEHCGTENLVIEGPTTCGYLPTNAVVKMPCPACQDPEIGPEHSVADYHNHSNIETRLRK…	1Q2W,1QZ8,1UJ1,1UK2,1UK3,1UK4,1UW7,1WOF,1Z1I,2A5A,2A5I,2A5K,2ACF,2AHM,2ALV,2AMD,2AMQ,2BX3,2BX4,2C3S,2D2D,2DUC,2FAV,2FE8,2FYG,2G9T,2GA6,2GDT,2GRI,2GT7,2GT8,2GTB,2GX4,2GZ7,2GZ8,2GZ9,2H2Z,2HOB,2HSX,2IDY,2JZF,2K7X,2K87,2KAF,2LIZ,2OP9,2OZK,2RNK,2V6N,2VJ1,2XYQ,2XYR,2XYV,2Z3C,2Z3D,2Z3E,2Z94,2Z9G,2Z9J,2Z9K,2Z9L,2ZU4,2ZU5,3D62,3E91,3E9S,3EA7,3EA8,3EBN,3IWM,3M3V,3MJ5,3R24,3SN8,3SNA,3SNB,3SNC,3SND,3SNE,3SZN…	Replicase polyprotein 1ab	R1AB_CVHSA	P0C6X7	P59641,Q6WGN0,Q7T697,Q808C0,Q80BV7,Q80BV8,Q80E51
19478	C[C@H](OC(C)(C)C)[C@H](NC(=O)OCc1ccccc1)C(=O)N[C@@H](CC1CCCCC1)C(=O)N[C@@H](C[C@@H]1CCNC1=O)C=O	InChI=1/C32H48N4O7/c1-21(43-32(2,3)4)27(36-31(41)42-20-23-13-9-6-10-14-23)30(40)35-26(17-22-11-7-5-8-12-22)29(39)34-25(19-37)18-24-15-16-33-28(24)38/h6,9-10,13-14,19,21-22,24-27H,5,7-8,11-12,15-18,20H2,1-4H3,(H,33,38)(H,34,39)(H,35,40)(H,36,41)/t21-,24-,25-,26-,27-/s2	YFUZVOLEKQFVCQ-IQHMNMHVNA-N	11233	N-[(benzyloxy)carbonyl]-O-(tert-butyl)-L-threonyl-3-cyclohexyl-N1-{(1S)-1-formyl-2-[(3S)-2-oxopyrrolidin-3-yl]ethyl}-L-alaninamide::TG-0205221::benzyl N-[(1S,2S)-2-(tert-butoxy)-1-{[(1S)-2-cyclohexyl-1-{[(2S)-1-oxo-3-[(3S)-2-oxopyrrolidin-3-yl]propan-2-yl]carbamoyl}ethyl]carbamoyl}propyl]carbamate	3C-like proteinase (3CL-PRO)	Human SARS coronavirus	53						7.5	25.00 C	Curated from the literature by BindingDB	10.1021/jm0603926	16884309			Yang, S; Chen, SJ; Hsu, MF; Wu, JD; Tseng, CT; Liu, YF; Chen, HC; Kuo, CW; Wu, CS; Chang, LW; Chen, WC; Liao, SY; Chang, TY; Hung, HH; Shr, HL; Liu, CY; Huang, YA; Chang, LY; Hsu, JC; Peters, CJ; Wang, AH; Hsu, MC	TaiGen Biotechnology Co.	http://www.bindingdb.org/bind/chemsearch/marvin/MolStructure.jsp?monomerid=11233	http://www.bindingdb.org/jsp/dbsearch/PrimarySearch_ki.jsp?energyterm=kJ/mole&tag=pol&polymerid=4753&target=3C-like+proteinase+%283CL-PRO%29&column=ki&startPg=0&Increment=50&submit=Search	http://www.bindingdb.org/jsp/dbsearch/PrimarySearch_ki.jsp?energyterm=kJ/mole&tag=r21&monomerid=11233&enzyme=3C-like+proteinase+%283CL-PRO%29&column=ki&startPg=0&Increment=50&submit=Search			91895789	46509356						ZINC14947873	1	MESLVLGVNEKTHVQLSLPVLQVRDVLVRGFGDSVEEALSEAREHLKNGTCGLVELEKGVLPQLEQPYVFIKRSDALSTNHGHKVVELVAEMDGIQYGRSGITLGVLVPHVGETPIAYRNVLLRKNGNKGAGGHSYGIDLKSYDLGDELGTDPIEDYEQNWNTKHGSGALRELTRELNGGAVTRYVDNNFCGPDGYPLDCIKDFLARAGKSMCTLSEQLDYIESKRGVYCCRDHEHEIAWFTERSDKSYEHQTPFEIKSAKKFDTFKGECPKFVFPLNSKVKVIQPRVEKKKTEGFMGRIRSVYPVASPQECNNMHLSTLMKCNHCDEVSWQTCDFLKATCEHCGTENLVIEGPTTCGYLPTNAVVKMPCPACQDPEIGPEHSVADYHNHSNIETRLRK…	1Q2W,1QZ8,1UJ1,1UK2,1UK3,1UK4,1UW7,1WOF,1Z1I,2A5A,2A5I,2A5K,2ACF,2AHM,2ALV,2AMD,2AMQ,2BX3,2BX4,2C3S,2D2D,2DUC,2FAV,2FE8,2FYG,2G9T,2GA6,2GDT,2GRI,2GT7,2GT8,2GTB,2GX4,2GZ7,2GZ8,2GZ9,2H2Z,2HOB,2HSX,2IDY,2JZF,2K7X,2K87,2KAF,2LIZ,2OP9,2OZK,2RNK,2V6N,2VJ1,2XYQ,2XYR,2XYV,2Z3C,2Z3D,2Z3E,2Z94,2Z9G,2Z9J,2Z9K,2Z9L,2ZU4,2ZU5,3D62,3E91,3E9S,3EA7,3EA8,3EBN,3IWM,3M3V,3MJ5,3R24,3SN8,3SNA,3SNB,3SNC,3SND,3SNE,3SZN…	Replicase polyprotein 1ab	R1AB_CVHSA	P0C6X7	P59641,Q6WGN0,Q7T697,Q808C0,Q80BV7,Q80BV8,Q80E51
19479	CN(C)c1ccc(cc1)C(=O)N[C@@H](Cc1ccccc1)C(=O)Nc1ccc(cc1Cl)[N+]([O-])=O	InChI=1/C24H23ClN4O4/c1-28(2)18-10-8-17(9-11-18)23(30)27-22(14-16-6-4-3-5-7-16)24(31)26-21-13-12-19(29(32)33)15-20(21)25/h3-13,15,22H,14H2,1-2H3,(H,26,31)(H,27,30)/t22-/s2	NBBWJEWPUKPHPZ-ANBDAQEENA-N	11234	(2S)-N-(2-chloro-4-nitrophenyl)-2-{[4-(dimethylamino)phenyl]formamido}-3-phenylpropanamide::Anilide Inhibitor 2a::N-(2-chloro-4-nitrophenyl)-N-[4-(dimethylamino)benzoyl]-L-phenylalaninamide	3C-like proteinase (3CL-PRO)	Human SARS coronavirus	30	60					7	25.00 C	Curated from the literature by BindingDB	10.1021/jm050184y	15974598			Shie, JJ; Fang, JM; Kuo, CJ; Kuo, TH; Liang, PH; Huang, HJ; Yang, WB; Lin, CH; Chen, JL; Wu, YT; Wong, CH	National Taiwan University	http://www.bindingdb.org/bind/chemsearch/marvin/MolStructure.jsp?monomerid=11234	http://www.bindingdb.org/jsp/dbsearch/PrimarySearch_ki.jsp?energyterm=kJ/mole&tag=pol&polymerid=4753&target=3C-like+proteinase+%283CL-PRO%29&column=ki&startPg=0&Increment=50&submit=Search	http://www.bindingdb.org/jsp/dbsearch/PrimarySearch_ki.jsp?energyterm=kJ/mole&tag=r21&monomerid=11234&enzyme=3C-like+proteinase+%283CL-PRO%29&column=ki&startPg=0&Increment=50&submit=Search			11317290	46511786						ZINC13646492	1	MESLVLGVNEKTHVQLSLPVLQVRDVLVRGFGDSVEEALSEAREHLKNGTCGLVELEKGVLPQLEQPYVFIKRSDALSTNHGHKVVELVAEMDGIQYGRSGITLGVLVPHVGETPIAYRNVLLRKNGNKGAGGHSYGIDLKSYDLGDELGTDPIEDYEQNWNTKHGSGALRELTRELNGGAVTRYVDNNFCGPDGYPLDCIKDFLARAGKSMCTLSEQLDYIESKRGVYCCRDHEHEIAWFTERSDKSYEHQTPFEIKSAKKFDTFKGECPKFVFPLNSKVKVIQPRVEKKKTEGFMGRIRSVYPVASPQECNNMHLSTLMKCNHCDEVSWQTCDFLKATCEHCGTENLVIEGPTTCGYLPTNAVVKMPCPACQDPEIGPEHSVADYHNHSNIETRLRK…	1Q2W,1QZ8,1UJ1,1UK2,1UK3,1UK4,1UW7,1WOF,1Z1I,2A5A,2A5I,2A5K,2ACF,2AHM,2ALV,2AMD,2AMQ,2BX3,2BX4,2C3S,2D2D,2DUC,2FAV,2FE8,2FYG,2G9T,2GA6,2GDT,2GRI,2GT7,2GT8,2GTB,2GX4,2GZ7,2GZ8,2GZ9,2H2Z,2HOB,2HSX,2IDY,2JZF,2K7X,2K87,2KAF,2LIZ,2OP9,2OZK,2RNK,2V6N,2VJ1,2XYQ,2XYR,2XYV,2Z3C,2Z3D,2Z3E,2Z94,2Z9G,2Z9J,2Z9K,2Z9L,2ZU4,2ZU5,3D62,3E91,3E9S,3EA7,3EA8,3EBN,3IWM,3M3V,3MJ5,3R24,3SN8,3SNA,3SNB,3SNC,3SND,3SNE,3SZN…	Replicase polyprotein 1ab	R1AB_CVHSA	P0C6X7	P59641,Q6WGN0,Q7T697,Q808C0,Q80BV7,Q80BV8,Q80E51
19480	CC(C)C[C@H](NC(=O)[C@@H](NC(=O)OC(C)(C)C)C(C)C)C(=O)N[C@@H](Cc1ccccc1)C(=O)Nc1ccc(cc1Cl)[N+]([O-])=O	InChI=1/C31H42ClN5O7/c1-18(2)15-24(35-29(40)26(19(3)4)36-30(41)44-31(5,6)7)27(38)34-25(16-20-11-9-8-10-12-20)28(39)33-23-14-13-21(37(42)43)17-22(23)32/h8-14,17-19,24-26H,15-16H2,1-7H3,(H,33,39)(H,34,38)(H,35,40)(H,36,41)/t24-,25-,26-/s2	ONKANJYUPWHECL-PHMDQJAKNA-N	11235	Anilide Inhibitor 3d::tert-butyl N-[(1S)-1-{[(1S)-1-{[(1S)-1-[(2-chloro-4-nitrophenyl)carbamoyl]-2-phenylethyl]carbamoyl}-3-methylbutyl]carbamoyl}-2-methylpropyl]carbamate	3C-like proteinase (3CL-PRO)	Human SARS coronavirus		>10000					7	25.00 C	Curated from the literature by BindingDB	10.1021/jm050184y	15974598			Shie, JJ; Fang, JM; Kuo, CJ; Kuo, TH; Liang, PH; Huang, HJ; Yang, WB; Lin, CH; Chen, JL; Wu, YT; Wong, CH	National Taiwan University	http://www.bindingdb.org/bind/chemsearch/marvin/MolStructure.jsp?monomerid=11235	http://www.bindingdb.org/jsp/dbsearch/PrimarySearch_ki.jsp?energyterm=kJ/mole&tag=pol&polymerid=4753&target=3C-like+proteinase+%283CL-PRO%29&column=ki&startPg=0&Increment=50&submit=Search	http://www.bindingdb.org/jsp/dbsearch/PrimarySearch_ki.jsp?energyterm=kJ/mole&tag=r21&monomerid=11235&enzyme=3C-like+proteinase+%283CL-PRO%29&column=ki&startPg=0&Increment=50&submit=Search			11262151	46511787						ZINC14947878	1	MESLVLGVNEKTHVQLSLPVLQVRDVLVRGFGDSVEEALSEAREHLKNGTCGLVELEKGVLPQLEQPYVFIKRSDALSTNHGHKVVELVAEMDGIQYGRSGITLGVLVPHVGETPIAYRNVLLRKNGNKGAGGHSYGIDLKSYDLGDELGTDPIEDYEQNWNTKHGSGALRELTRELNGGAVTRYVDNNFCGPDGYPLDCIKDFLARAGKSMCTLSEQLDYIESKRGVYCCRDHEHEIAWFTERSDKSYEHQTPFEIKSAKKFDTFKGECPKFVFPLNSKVKVIQPRVEKKKTEGFMGRIRSVYPVASPQECNNMHLSTLMKCNHCDEVSWQTCDFLKATCEHCGTENLVIEGPTTCGYLPTNAVVKMPCPACQDPEIGPEHSVADYHNHSNIETRLRK…	1Q2W,1QZ8,1UJ1,1UK2,1UK3,1UK4,1UW7,1WOF,1Z1I,2A5A,2A5I,2A5K,2ACF,2AHM,2ALV,2AMD,2AMQ,2BX3,2BX4,2C3S,2D2D,2DUC,2FAV,2FE8,2FYG,2G9T,2GA6,2GDT,2GRI,2GT7,2GT8,2GTB,2GX4,2GZ7,2GZ8,2GZ9,2H2Z,2HOB,2HSX,2IDY,2JZF,2K7X,2K87,2KAF,2LIZ,2OP9,2OZK,2RNK,2V6N,2VJ1,2XYQ,2XYR,2XYV,2Z3C,2Z3D,2Z3E,2Z94,2Z9G,2Z9J,2Z9K,2Z9L,2ZU4,2ZU5,3D62,3E91,3E9S,3EA7,3EA8,3EBN,3IWM,3M3V,3MJ5,3R24,3SN8,3SNA,3SNB,3SNC,3SND,3SNE,3SZN…	Replicase polyprotein 1ab	R1AB_CVHSA	P0C6X7	P59641,Q6WGN0,Q7T697,Q808C0,Q80BV7,Q80BV8,Q80E51
19481	CC(C)C[C@H](NC(=O)[C@@H](NC(=O)c1cccs1)C(C)C)C(=O)N[C@@H](Cc1ccccc1)C(=O)Nc1ccc(cc1Cl)[N+]([O-])=O	InChI=1/C31H36ClN5O6S/c1-18(2)15-24(35-31(41)27(19(3)4)36-30(40)26-11-8-14-44-26)28(38)34-25(16-20-9-6-5-7-10-20)29(39)33-23-13-12-21(37(42)43)17-22(23)32/h5-14,17-19,24-25,27H,15-16H2,1-4H3,(H,33,39)(H,34,38)(H,35,41)(H,36,40)/t24-,25-,27-/s2	BOBHTKXBEGQHHJ-DCDZFBFRNA-N	11236	(2S)-N-[(1S)-1-[(2-chloro-4-nitrophenyl)carbamoyl]-2-phenylethyl]-4-methyl-2-[(2S)-3-methyl-2-(thiophen-2-ylformamido)butanamido]pentanamide::Anilide Inhibitor 3h::N-(thien-2-ylcarbonyl)-L-valyl-L-leucyl-N-(2-chloro-4-nitrophenyl)-L-phenylalaninamide	3C-like proteinase (3CL-PRO)	Human SARS coronavirus	2290	5000					7	25.00 C	Curated from the literature by BindingDB	10.1021/jm050184y	15974598			Shie, JJ; Fang, JM; Kuo, CJ; Kuo, TH; Liang, PH; Huang, HJ; Yang, WB; Lin, CH; Chen, JL; Wu, YT; Wong, CH	National Taiwan University	http://www.bindingdb.org/bind/chemsearch/marvin/MolStructure.jsp?monomerid=11236	http://www.bindingdb.org/jsp/dbsearch/PrimarySearch_ki.jsp?energyterm=kJ/mole&tag=pol&polymerid=4753&target=3C-like+proteinase+%283CL-PRO%29&column=ki&startPg=0&Increment=50&submit=Search	http://www.bindingdb.org/jsp/dbsearch/PrimarySearch_ki.jsp?energyterm=kJ/mole&tag=r21&monomerid=11236&enzyme=3C-like+proteinase+%283CL-PRO%29&column=ki&startPg=0&Increment=50&submit=Search			11467858	46511788						ZINC28472765	1	MESLVLGVNEKTHVQLSLPVLQVRDVLVRGFGDSVEEALSEAREHLKNGTCGLVELEKGVLPQLEQPYVFIKRSDALSTNHGHKVVELVAEMDGIQYGRSGITLGVLVPHVGETPIAYRNVLLRKNGNKGAGGHSYGIDLKSYDLGDELGTDPIEDYEQNWNTKHGSGALRELTRELNGGAVTRYVDNNFCGPDGYPLDCIKDFLARAGKSMCTLSEQLDYIESKRGVYCCRDHEHEIAWFTERSDKSYEHQTPFEIKSAKKFDTFKGECPKFVFPLNSKVKVIQPRVEKKKTEGFMGRIRSVYPVASPQECNNMHLSTLMKCNHCDEVSWQTCDFLKATCEHCGTENLVIEGPTTCGYLPTNAVVKMPCPACQDPEIGPEHSVADYHNHSNIETRLRK…	1Q2W,1QZ8,1UJ1,1UK2,1UK3,1UK4,1UW7,1WOF,1Z1I,2A5A,2A5I,2A5K,2ACF,2AHM,2ALV,2AMD,2AMQ,2BX3,2BX4,2C3S,2D2D,2DUC,2FAV,2FE8,2FYG,2G9T,2GA6,2GDT,2GRI,2GT7,2GT8,2GTB,2GX4,2GZ7,2GZ8,2GZ9,2H2Z,2HOB,2HSX,2IDY,2JZF,2K7X,2K87,2KAF,2LIZ,2OP9,2OZK,2RNK,2V6N,2VJ1,2XYQ,2XYR,2XYV,2Z3C,2Z3D,2Z3E,2Z94,2Z9G,2Z9J,2Z9K,2Z9L,2ZU4,2ZU5,3D62,3E91,3E9S,3EA7,3EA8,3EBN,3IWM,3M3V,3MJ5,3R24,3SN8,3SNA,3SNB,3SNC,3SND,3SNE,3SZN…	Replicase polyprotein 1ab	R1AB_CVHSA	P0C6X7	P59641,Q6WGN0,Q7T697,Q808C0,Q80BV7,Q80BV8,Q80E51
19482	CC(C)C(NC(=O)c1cc(C)[o+][n-]1)C(=O)NC(Cc1ccccc1)C(=O)NC(Cc1ccccc1)C(=O)Nc1ccc(cc1Cl)[N+]([O-])=O	InChI=1/C34H35ClN6O7/c1-20(2)30(39-33(44)29-16-21(3)48-40-29)34(45)38-28(18-23-12-8-5-9-13-23)32(43)37-27(17-22-10-6-4-7-11-22)31(42)36-26-15-14-24(41(46)47)19-25(26)35/h4-16,19-20,27-28,30H,17-18H2,1-3H3,(H,36,42)(H,37,43)(H,38,45)(H,39,44)	SHBMVTFCFMSMCY-UHFFFAOYNA-N	11237	(2S)-N-[(1S)-1-{[(1S)-1-[(2-chloro-4-nitrophenyl)carbamoyl]-2-phenylethyl]carbamoyl}-2-phenylethyl]-3-methyl-2-[(5-methyl-1,2-oxazol-3-yl)formamido]butanamide::Anilide Inhibitor 3o::N-[(5-methylisoxazol-3-yl)carbonyl]-L-valyl-L-phenylalanyl-N-(2-chloro-4-nitrophenyl)-L-phenylalaninamide	3C-like proteinase (3CL-PRO)	Human SARS coronavirus	2900	7000					7	25.00 C	Curated from the literature by BindingDB	10.1021/jm050184y	15974598			Shie, JJ; Fang, JM; Kuo, CJ; Kuo, TH; Liang, PH; Huang, HJ; Yang, WB; Lin, CH; Chen, JL; Wu, YT; Wong, CH	National Taiwan University	http://www.bindingdb.org/bind/chemsearch/marvin/MolStructure.jsp?monomerid=11237	http://www.bindingdb.org/jsp/dbsearch/PrimarySearch_ki.jsp?energyterm=kJ/mole&tag=pol&polymerid=4753&target=3C-like+proteinase+%283CL-PRO%29&column=ki&startPg=0&Increment=50&submit=Search	http://www.bindingdb.org/jsp/dbsearch/PrimarySearch_ki.jsp?energyterm=kJ/mole&tag=r21&monomerid=11237&enzyme=3C-like+proteinase+%283CL-PRO%29&column=ki&startPg=0&Increment=50&submit=Search			85426836	46511789						ZINC96210335	1	MESLVLGVNEKTHVQLSLPVLQVRDVLVRGFGDSVEEALSEAREHLKNGTCGLVELEKGVLPQLEQPYVFIKRSDALSTNHGHKVVELVAEMDGIQYGRSGITLGVLVPHVGETPIAYRNVLLRKNGNKGAGGHSYGIDLKSYDLGDELGTDPIEDYEQNWNTKHGSGALRELTRELNGGAVTRYVDNNFCGPDGYPLDCIKDFLARAGKSMCTLSEQLDYIESKRGVYCCRDHEHEIAWFTERSDKSYEHQTPFEIKSAKKFDTFKGECPKFVFPLNSKVKVIQPRVEKKKTEGFMGRIRSVYPVASPQECNNMHLSTLMKCNHCDEVSWQTCDFLKATCEHCGTENLVIEGPTTCGYLPTNAVVKMPCPACQDPEIGPEHSVADYHNHSNIETRLRK…	1Q2W,1QZ8,1UJ1,1UK2,1UK3,1UK4,1UW7,1WOF,1Z1I,2A5A,2A5I,2A5K,2ACF,2AHM,2ALV,2AMD,2AMQ,2BX3,2BX4,2C3S,2D2D,2DUC,2FAV,2FE8,2FYG,2G9T,2GA6,2GDT,2GRI,2GT7,2GT8,2GTB,2GX4,2GZ7,2GZ8,2GZ9,2H2Z,2HOB,2HSX,2IDY,2JZF,2K7X,2K87,2KAF,2LIZ,2OP9,2OZK,2RNK,2V6N,2VJ1,2XYQ,2XYR,2XYV,2Z3C,2Z3D,2Z3E,2Z94,2Z9G,2Z9J,2Z9K,2Z9L,2ZU4,2ZU5,3D62,3E91,3E9S,3EA7,3EA8,3EBN,3IWM,3M3V,3MJ5,3R24,3SN8,3SNA,3SNB,3SNC,3SND,3SNE,3SZN…	Replicase polyprotein 1ab	R1AB_CVHSA	P0C6X7	P59641,Q6WGN0,Q7T697,Q808C0,Q80BV7,Q80BV8,Q80E51
19483	CC(C)[C@H](NC(=O)c1cccs1)C(=O)N[C@@H](Cc1ccccc1)C(=O)N[C@@H](Cc1ccccc1)C(=O)Nc1ccc(cc1Cl)[N+]([O-])=O	InChI=1/C34H34ClN5O6S/c1-21(2)30(39-33(43)29-14-9-17-47-29)34(44)38-28(19-23-12-7-4-8-13-23)32(42)37-27(18-22-10-5-3-6-11-22)31(41)36-26-16-15-24(40(45)46)20-25(26)35/h3-17,20-21,27-28,30H,18-19H2,1-2H3,(H,36,41)(H,37,42)(H,38,44)(H,39,43)/t27-,28-,30-/s2	NOUWGKBFWDKEIW-QASJAPPYNA-N	11238	(2S)-N-[(1S)-1-{[(1S)-1-[(2-chloro-4-nitrophenyl)carbamoyl]-2-phenylethyl]carbamoyl}-2-phenylethyl]-3-methyl-2-(thiophen-2-ylformamido)butanamide::Anilide Inhibitor 3p::N-(thien-2-ylcarbonyl)-L-valyl-L-phenylalanyl-N-(2-chloro-4-nitrophenyl)-L-phenylalaninamide	3C-like proteinase (3CL-PRO)	Human SARS coronavirus	4300	5000					7	25.00 C	Curated from the literature by BindingDB	10.1021/jm050184y	15974598			Shie, JJ; Fang, JM; Kuo, CJ; Kuo, TH; Liang, PH; Huang, HJ; Yang, WB; Lin, CH; Chen, JL; Wu, YT; Wong, CH	National Taiwan University	http://www.bindingdb.org/bind/chemsearch/marvin/MolStructure.jsp?monomerid=11238	http://www.bindingdb.org/jsp/dbsearch/PrimarySearch_ki.jsp?energyterm=kJ/mole&tag=pol&polymerid=4753&target=3C-like+proteinase+%283CL-PRO%29&column=ki&startPg=0&Increment=50&submit=Search	http://www.bindingdb.org/jsp/dbsearch/PrimarySearch_ki.jsp?energyterm=kJ/mole&tag=r21&monomerid=11238&enzyme=3C-like+proteinase+%283CL-PRO%29&column=ki&startPg=0&Increment=50&submit=Search			11227702	46511790						ZINC28469361	1	MESLVLGVNEKTHVQLSLPVLQVRDVLVRGFGDSVEEALSEAREHLKNGTCGLVELEKGVLPQLEQPYVFIKRSDALSTNHGHKVVELVAEMDGIQYGRSGITLGVLVPHVGETPIAYRNVLLRKNGNKGAGGHSYGIDLKSYDLGDELGTDPIEDYEQNWNTKHGSGALRELTRELNGGAVTRYVDNNFCGPDGYPLDCIKDFLARAGKSMCTLSEQLDYIESKRGVYCCRDHEHEIAWFTERSDKSYEHQTPFEIKSAKKFDTFKGECPKFVFPLNSKVKVIQPRVEKKKTEGFMGRIRSVYPVASPQECNNMHLSTLMKCNHCDEVSWQTCDFLKATCEHCGTENLVIEGPTTCGYLPTNAVVKMPCPACQDPEIGPEHSVADYHNHSNIETRLRK…	1Q2W,1QZ8,1UJ1,1UK2,1UK3,1UK4,1UW7,1WOF,1Z1I,2A5A,2A5I,2A5K,2ACF,2AHM,2ALV,2AMD,2AMQ,2BX3,2BX4,2C3S,2D2D,2DUC,2FAV,2FE8,2FYG,2G9T,2GA6,2GDT,2GRI,2GT7,2GT8,2GTB,2GX4,2GZ7,2GZ8,2GZ9,2H2Z,2HOB,2HSX,2IDY,2JZF,2K7X,2K87,2KAF,2LIZ,2OP9,2OZK,2RNK,2V6N,2VJ1,2XYQ,2XYR,2XYV,2Z3C,2Z3D,2Z3E,2Z94,2Z9G,2Z9J,2Z9K,2Z9L,2ZU4,2ZU5,3D62,3E91,3E9S,3EA7,3EA8,3EBN,3IWM,3M3V,3MJ5,3R24,3SN8,3SNA,3SNB,3SNC,3SND,3SNE,3SZN…	Replicase polyprotein 1ab	R1AB_CVHSA	P0C6X7	P59641,Q6WGN0,Q7T697,Q808C0,Q80BV7,Q80BV8,Q80E51
19484	CC(C)[C@H](NC(=O)c1cc(C)on1)C(=O)N[C@@H](Cc1ccccc1)C(=O)N[C@@H](C(C)O)C(=O)N[C@@H](Cc1ccccc1)C(=O)Nc1ccc(cc1Cl)[N+]([O-])=O	InChI=1/C38H42ClN7O9/c1-21(2)32(43-36(50)31-17-22(3)55-45-31)37(51)41-30(19-25-13-9-6-10-14-25)35(49)44-33(23(4)47)38(52)42-29(18-24-11-7-5-8-12-24)34(48)40-28-16-15-26(46(53)54)20-27(28)39/h5-17,20-21,23,29-30,32-33,47H,18-19H2,1-4H3,(H,40,48)(H,41,51)(H,42,52)(H,43,50)(H,44,49)/t23?,29-,30-,32-,33-/s2	GGJACBVAQGGMCL-NTMXLCEXNA-N	11239	(2S)-N-[(1S)-1-{[(1S,2S)-1-{[(1S)-1-[(2-chloro-4-nitrophenyl)carbamoyl]-2-phenylethyl]carbamoyl}-2-hydroxypropyl]carbamoyl}-2-phenylethyl]-3-methyl-2-[(5-methyl-1,2-oxazol-3-yl)formamido]butanamide::Anilide Inhibitor 4j::N-[(5-methylisoxazol-3-yl)carbonyl]-L-valyl-L-phenylalanyl-L-threonyl-N-(2-chloro-4-nitrophenyl)-L-phenylalaninamide	3C-like proteinase (3CL-PRO)	Human SARS coronavirus	1610	5000					7	25.00 C	Curated from the literature by BindingDB	10.1021/jm050184y	15974598			Shie, JJ; Fang, JM; Kuo, CJ; Kuo, TH; Liang, PH; Huang, HJ; Yang, WB; Lin, CH; Chen, JL; Wu, YT; Wong, CH	National Taiwan University	http://www.bindingdb.org/bind/chemsearch/marvin/MolStructure.jsp?monomerid=11239	http://www.bindingdb.org/jsp/dbsearch/PrimarySearch_ki.jsp?energyterm=kJ/mole&tag=pol&polymerid=4753&target=3C-like+proteinase+%283CL-PRO%29&column=ki&startPg=0&Increment=50&submit=Search	http://www.bindingdb.org/jsp/dbsearch/PrimarySearch_ki.jsp?energyterm=kJ/mole&tag=r21&monomerid=11239&enzyme=3C-like+proteinase+%283CL-PRO%29&column=ki&startPg=0&Increment=50&submit=Search			15959316	46509357						ZINC96210342	1	MESLVLGVNEKTHVQLSLPVLQVRDVLVRGFGDSVEEALSEAREHLKNGTCGLVELEKGVLPQLEQPYVFIKRSDALSTNHGHKVVELVAEMDGIQYGRSGITLGVLVPHVGETPIAYRNVLLRKNGNKGAGGHSYGIDLKSYDLGDELGTDPIEDYEQNWNTKHGSGALRELTRELNGGAVTRYVDNNFCGPDGYPLDCIKDFLARAGKSMCTLSEQLDYIESKRGVYCCRDHEHEIAWFTERSDKSYEHQTPFEIKSAKKFDTFKGECPKFVFPLNSKVKVIQPRVEKKKTEGFMGRIRSVYPVASPQECNNMHLSTLMKCNHCDEVSWQTCDFLKATCEHCGTENLVIEGPTTCGYLPTNAVVKMPCPACQDPEIGPEHSVADYHNHSNIETRLRK…	1Q2W,1QZ8,1UJ1,1UK2,1UK3,1UK4,1UW7,1WOF,1Z1I,2A5A,2A5I,2A5K,2ACF,2AHM,2ALV,2AMD,2AMQ,2BX3,2BX4,2C3S,2D2D,2DUC,2FAV,2FE8,2FYG,2G9T,2GA6,2GDT,2GRI,2GT7,2GT8,2GTB,2GX4,2GZ7,2GZ8,2GZ9,2H2Z,2HOB,2HSX,2IDY,2JZF,2K7X,2K87,2KAF,2LIZ,2OP9,2OZK,2RNK,2V6N,2VJ1,2XYQ,2XYR,2XYV,2Z3C,2Z3D,2Z3E,2Z94,2Z9G,2Z9J,2Z9K,2Z9L,2ZU4,2ZU5,3D62,3E91,3E9S,3EA7,3EA8,3EBN,3IWM,3M3V,3MJ5,3R24,3SN8,3SNA,3SNB,3SNC,3SND,3SNE,3SZN…	Replicase polyprotein 1ab	R1AB_CVHSA	P0C6X7	P59641,Q6WGN0,Q7T697,Q808C0,Q80BV7,Q80BV8,Q80E51
19485	CC(C)[C@H](NC(=O)OCc1ccccc1)C(=O)N[C@@H](Cc1ccccc1)C(=O)N[C@@H](C(C)O)C(=O)N[C@@H](Cc1ccccc1)C(=O)Nc1ccc(cc1Cl)[N+]([O-])=O	InChI=1/C41H45ClN6O9/c1-25(2)35(47-41(54)57-24-29-17-11-6-12-18-29)39(52)44-34(22-28-15-9-5-10-16-28)38(51)46-36(26(3)49)40(53)45-33(21-27-13-7-4-8-14-27)37(50)43-32-20-19-30(48(55)56)23-31(32)42/h4-20,23,25-26,33-36,49H,21-22,24H2,1-3H3,(H,43,50)(H,44,52)(H,45,53)(H,46,51)(H,47,54)/t26?,33-,34-,35-,36-/s2	GVHOYMBPDIKJRB-NUOFUOAUNA-N	11240	Anilide Inhibitor 4k::N-[(benzyloxy)carbonyl]-L-valyl-L-phenylalanyl-L-threonyl-N-(2-chloro-4-nitrophenyl)-L-phenylalaninamide::benzyl N-[(1S)-1-{[(1S)-1-{[(1S,2S)-1-{[(1S)-1-[(2-chloro-4-nitrophenyl)carbamoyl]-2-phenylethyl]carbamoyl}-2-hydroxypropyl]carbamoyl}-2-phenylethyl]carbamoyl}-2-methylpropyl]carbamate	3C-like proteinase (3CL-PRO)	Human SARS coronavirus	1510	6000					7	25.00 C	Curated from the literature by BindingDB	10.1021/jm050184y	15974598			Shie, JJ; Fang, JM; Kuo, CJ; Kuo, TH; Liang, PH; Huang, HJ; Yang, WB; Lin, CH; Chen, JL; Wu, YT; Wong, CH	National Taiwan University	http://www.bindingdb.org/bind/chemsearch/marvin/MolStructure.jsp?monomerid=11240	http://www.bindingdb.org/jsp/dbsearch/PrimarySearch_ki.jsp?energyterm=kJ/mole&tag=pol&polymerid=4753&target=3C-like+proteinase+%283CL-PRO%29&column=ki&startPg=0&Increment=50&submit=Search	http://www.bindingdb.org/jsp/dbsearch/PrimarySearch_ki.jsp?energyterm=kJ/mole&tag=r21&monomerid=11240&enzyme=3C-like+proteinase+%283CL-PRO%29&column=ki&startPg=0&Increment=50&submit=Search			15959317	46511511						ZINC95612354	1	MESLVLGVNEKTHVQLSLPVLQVRDVLVRGFGDSVEEALSEAREHLKNGTCGLVELEKGVLPQLEQPYVFIKRSDALSTNHGHKVVELVAEMDGIQYGRSGITLGVLVPHVGETPIAYRNVLLRKNGNKGAGGHSYGIDLKSYDLGDELGTDPIEDYEQNWNTKHGSGALRELTRELNGGAVTRYVDNNFCGPDGYPLDCIKDFLARAGKSMCTLSEQLDYIESKRGVYCCRDHEHEIAWFTERSDKSYEHQTPFEIKSAKKFDTFKGECPKFVFPLNSKVKVIQPRVEKKKTEGFMGRIRSVYPVASPQECNNMHLSTLMKCNHCDEVSWQTCDFLKATCEHCGTENLVIEGPTTCGYLPTNAVVKMPCPACQDPEIGPEHSVADYHNHSNIETRLRK…	1Q2W,1QZ8,1UJ1,1UK2,1UK3,1UK4,1UW7,1WOF,1Z1I,2A5A,2A5I,2A5K,2ACF,2AHM,2ALV,2AMD,2AMQ,2BX3,2BX4,2C3S,2D2D,2DUC,2FAV,2FE8,2FYG,2G9T,2GA6,2GDT,2GRI,2GT7,2GT8,2GTB,2GX4,2GZ7,2GZ8,2GZ9,2H2Z,2HOB,2HSX,2IDY,2JZF,2K7X,2K87,2KAF,2LIZ,2OP9,2OZK,2RNK,2V6N,2VJ1,2XYQ,2XYR,2XYV,2Z3C,2Z3D,2Z3E,2Z94,2Z9G,2Z9J,2Z9K,2Z9L,2ZU4,2ZU5,3D62,3E91,3E9S,3EA7,3EA8,3EBN,3IWM,3M3V,3MJ5,3R24,3SN8,3SNA,3SNB,3SNC,3SND,3SNE,3SZN…	Replicase polyprotein 1ab	R1AB_CVHSA	P0C6X7	P59641,Q6WGN0,Q7T697,Q808C0,Q80BV7,Q80BV8,Q80E51
19486	O[C@@H](CC(=O)N[C@@H](Cc1ccccc1)C(=O)Nc1ccc(cc1Cl)[N+]([O-])=O)C(=O)N[C@@H](Cc1ccccc1)C(=O)Nc1ccc(cc1Cl)[N+]([O-])=O	InChI=1/C34H30Cl2N6O9/c35-24-17-22(41(48)49)11-13-26(24)38-32(45)28(15-20-7-3-1-4-8-20)37-31(44)19-30(43)34(47)40-29(16-21-9-5-2-6-10-21)33(46)39-27-14-12-23(42(50)51)18-25(27)36/h1-14,17-18,28-30,43H,15-16,19H2,(H,37,44)(H,38,45)(H,39,46)(H,40,47)/t28-,29-,30-/s2	FCKXGFANXSHGAW-GZQLONLRNA-N	11241	(2S)-N,N'-bis[(1S)-1-[(2-chloro-4-nitrophenyl)carbamoyl]-2-phenylethyl]-2-hydroxybutanediamide::Anilide Inhibitor 5b::Bis-anilide	3C-like proteinase (3CL-PRO)	Human SARS coronavirus	3100	4000					7	25.00 C	Curated from the literature by BindingDB	10.1021/jm050184y	15974598			Shie, JJ; Fang, JM; Kuo, CJ; Kuo, TH; Liang, PH; Huang, HJ; Yang, WB; Lin, CH; Chen, JL; Wu, YT; Wong, CH	National Taiwan University	http://www.bindingdb.org/bind/chemsearch/marvin/MolStructure.jsp?monomerid=11241	http://www.bindingdb.org/jsp/dbsearch/PrimarySearch_ki.jsp?energyterm=kJ/mole&tag=pol&polymerid=4753&target=3C-like+proteinase+%283CL-PRO%29&column=ki&startPg=0&Increment=50&submit=Search	http://www.bindingdb.org/jsp/dbsearch/PrimarySearch_ki.jsp?energyterm=kJ/mole&tag=r21&monomerid=11241&enzyme=3C-like+proteinase+%283CL-PRO%29&column=ki&startPg=0&Increment=50&submit=Search			11491101	46511792						ZINC95606624	1	MESLVLGVNEKTHVQLSLPVLQVRDVLVRGFGDSVEEALSEAREHLKNGTCGLVELEKGVLPQLEQPYVFIKRSDALSTNHGHKVVELVAEMDGIQYGRSGITLGVLVPHVGETPIAYRNVLLRKNGNKGAGGHSYGIDLKSYDLGDELGTDPIEDYEQNWNTKHGSGALRELTRELNGGAVTRYVDNNFCGPDGYPLDCIKDFLARAGKSMCTLSEQLDYIESKRGVYCCRDHEHEIAWFTERSDKSYEHQTPFEIKSAKKFDTFKGECPKFVFPLNSKVKVIQPRVEKKKTEGFMGRIRSVYPVASPQECNNMHLSTLMKCNHCDEVSWQTCDFLKATCEHCGTENLVIEGPTTCGYLPTNAVVKMPCPACQDPEIGPEHSVADYHNHSNIETRLRK…	1Q2W,1QZ8,1UJ1,1UK2,1UK3,1UK4,1UW7,1WOF,1Z1I,2A5A,2A5I,2A5K,2ACF,2AHM,2ALV,2AMD,2AMQ,2BX3,2BX4,2C3S,2D2D,2DUC,2FAV,2FE8,2FYG,2G9T,2GA6,2GDT,2GRI,2GT7,2GT8,2GTB,2GX4,2GZ7,2GZ8,2GZ9,2H2Z,2HOB,2HSX,2IDY,2JZF,2K7X,2K87,2KAF,2LIZ,2OP9,2OZK,2RNK,2V6N,2VJ1,2XYQ,2XYR,2XYV,2Z3C,2Z3D,2Z3E,2Z94,2Z9G,2Z9J,2Z9K,2Z9L,2ZU4,2ZU5,3D62,3E91,3E9S,3EA7,3EA8,3EBN,3IWM,3M3V,3MJ5,3R24,3SN8,3SNA,3SNB,3SNC,3SND,3SNE,3SZN…	Replicase polyprotein 1ab	R1AB_CVHSA	P0C6X7	P59641,Q6WGN0,Q7T697,Q808C0,Q80BV7,Q80BV8,Q80E51
19487	Oc1ccc(Cl)cc1C(=O)Nc1ccc(cc1Cl)[N+]([O-])=O	InChI=1S/C13H8Cl2N2O4/c14-7-1-4-12(18)9(5-7)13(19)16-11-3-2-8(17(20)21)6-10(11)15/h1-6,18H,(H,16,19)	RJMUSRYZPJIFPJ-UHFFFAOYSA-N	11242	5-chloro-N-(2-chloro-4-nitrophenyl)-2-hydroxybenzamide::niclosamide	3C-like proteinase (3CL-PRO)	Human SARS coronavirus		>50000					7	25.00 C	Curated from the literature by BindingDB	10.1021/jm050184y	15974598			Shie, JJ; Fang, JM; Kuo, CJ; Kuo, TH; Liang, PH; Huang, HJ; Yang, WB; Lin, CH; Chen, JL; Wu, YT; Wong, CH	National Taiwan University	http://www.bindingdb.org/bind/chemsearch/marvin/MolStructure.jsp?monomerid=11242	http://www.bindingdb.org/jsp/dbsearch/PrimarySearch_ki.jsp?energyterm=kJ/mole&tag=pol&polymerid=4753&target=3C-like+proteinase+%283CL-PRO%29&column=ki&startPg=0&Increment=50&submit=Search	http://www.bindingdb.org/jsp/dbsearch/PrimarySearch_ki.jsp?energyterm=kJ/mole&tag=r21&monomerid=11242&enzyme=3C-like+proteinase+%283CL-PRO%29&column=ki&startPg=0&Increment=50&submit=Search			4477	46511793			DB06803			ZINC03874496	1	MESLVLGVNEKTHVQLSLPVLQVRDVLVRGFGDSVEEALSEAREHLKNGTCGLVELEKGVLPQLEQPYVFIKRSDALSTNHGHKVVELVAEMDGIQYGRSGITLGVLVPHVGETPIAYRNVLLRKNGNKGAGGHSYGIDLKSYDLGDELGTDPIEDYEQNWNTKHGSGALRELTRELNGGAVTRYVDNNFCGPDGYPLDCIKDFLARAGKSMCTLSEQLDYIESKRGVYCCRDHEHEIAWFTERSDKSYEHQTPFEIKSAKKFDTFKGECPKFVFPLNSKVKVIQPRVEKKKTEGFMGRIRSVYPVASPQECNNMHLSTLMKCNHCDEVSWQTCDFLKATCEHCGTENLVIEGPTTCGYLPTNAVVKMPCPACQDPEIGPEHSVADYHNHSNIETRLRK…	1Q2W,1QZ8,1UJ1,1UK2,1UK3,1UK4,1UW7,1WOF,1Z1I,2A5A,2A5I,2A5K,2ACF,2AHM,2ALV,2AMD,2AMQ,2BX3,2BX4,2C3S,2D2D,2DUC,2FAV,2FE8,2FYG,2G9T,2GA6,2GDT,2GRI,2GT7,2GT8,2GTB,2GX4,2GZ7,2GZ8,2GZ9,2H2Z,2HOB,2HSX,2IDY,2JZF,2K7X,2K87,2KAF,2LIZ,2OP9,2OZK,2RNK,2V6N,2VJ1,2XYQ,2XYR,2XYV,2Z3C,2Z3D,2Z3E,2Z94,2Z9G,2Z9J,2Z9K,2Z9L,2ZU4,2ZU5,3D62,3E91,3E9S,3EA7,3EA8,3EBN,3IWM,3M3V,3MJ5,3R24,3SN8,3SNA,3SNB,3SNC,3SND,3SNE,3SZN…	Replicase polyprotein 1ab	R1AB_CVHSA	P0C6X7	P59641,Q6WGN0,Q7T697,Q808C0,Q80BV7,Q80BV8,Q80E51
19488	CCOC(=O)\C=C\[C@H](C[C@@H]1CCNC1=O)NC(=O)[C@@H](CC(=O)[C@@H](NC(=O)c1cc(C)on1)C(C)C)Cc1ccc(F)cc1	InChI=1/C31H39FN4O7/c1-5-42-27(38)11-10-24(16-21-12-13-33-29(21)39)34-30(40)22(15-20-6-8-23(32)9-7-20)17-26(37)28(18(2)3)35-31(41)25-14-19(4)43-36-25/h6-11,14,18,21-22,24,28H,5,12-13,15-17H2,1-4H3,(H,33,39)(H,34,40)(H,35,41)/b11-10+/t21-,22+,24+,28-/s2	CAYJBRBGZBCZKO-TYPUIQHCNA-N	11243	AG7088::CHEMBL20210::ethyl (2E,4S)-4-[((2R,5S)-2-(4-fluorobenzyl)-6-methyl-5-{[(5-methylisoxazol-3-yl)carbonyl]amino}-4-oxoheptanoyl)amino]-5-[(3S)-2-oxopyrrolidin-3-yl]pent-2-enoate::ethyl (2E,4S)-4-[(2R,5S)-2-[(4-fluorophenyl)methyl]-6-methyl-5-[(5-methyl-1,2-oxazol-3-yl)formamido]-4-oxoheptanamido]-5-[(3S)-2-oxopyrrolidin-3-yl]pent-2-enoate	3C-like proteinase (3CL-PRO)	Human SARS coronavirus		>100000					7	25.00 C	Curated from the literature by BindingDB	10.1016/j.bmc.2005.05.065	15994085			Shie, JJ; Fang, JM; Kuo, TH; Kuo, CJ; Liang, PH; Huang, HJ; Wu, YT; Jan, JT; Cheng, YS; Wong, CH	National Taiwan University	http://www.bindingdb.org/bind/chemsearch/marvin/MolStructure.jsp?monomerid=11243	http://www.bindingdb.org/jsp/dbsearch/PrimarySearch_ki.jsp?energyterm=kJ/mole&tag=pol&polymerid=4753&target=3C-like+proteinase+%283CL-PRO%29&column=ki&startPg=0&Increment=50&submit=Search	http://www.bindingdb.org/jsp/dbsearch/PrimarySearch_ki.jsp?energyterm=kJ/mole&tag=r21&monomerid=11243&enzyme=3C-like+proteinase+%283CL-PRO%29&column=ki&startPg=0&Increment=50&submit=Search			6440352	46511795		CHEMBL20210	DB05102			ZINC03919807	1	MESLVLGVNEKTHVQLSLPVLQVRDVLVRGFGDSVEEALSEAREHLKNGTCGLVELEKGVLPQLEQPYVFIKRSDALSTNHGHKVVELVAEMDGIQYGRSGITLGVLVPHVGETPIAYRNVLLRKNGNKGAGGHSYGIDLKSYDLGDELGTDPIEDYEQNWNTKHGSGALRELTRELNGGAVTRYVDNNFCGPDGYPLDCIKDFLARAGKSMCTLSEQLDYIESKRGVYCCRDHEHEIAWFTERSDKSYEHQTPFEIKSAKKFDTFKGECPKFVFPLNSKVKVIQPRVEKKKTEGFMGRIRSVYPVASPQECNNMHLSTLMKCNHCDEVSWQTCDFLKATCEHCGTENLVIEGPTTCGYLPTNAVVKMPCPACQDPEIGPEHSVADYHNHSNIETRLRK…	1Q2W,1QZ8,1UJ1,1UK2,1UK3,1UK4,1UW7,1WOF,1Z1I,2A5A,2A5I,2A5K,2ACF,2AHM,2ALV,2AMD,2AMQ,2BX3,2BX4,2C3S,2D2D,2DUC,2FAV,2FE8,2FYG,2G9T,2GA6,2GDT,2GRI,2GT7,2GT8,2GTB,2GX4,2GZ7,2GZ8,2GZ9,2H2Z,2HOB,2HSX,2IDY,2JZF,2K7X,2K87,2KAF,2LIZ,2OP9,2OZK,2RNK,2V6N,2VJ1,2XYQ,2XYR,2XYV,2Z3C,2Z3D,2Z3E,2Z94,2Z9G,2Z9J,2Z9K,2Z9L,2ZU4,2ZU5,3D62,3E91,3E9S,3EA7,3EA8,3EBN,3IWM,3M3V,3MJ5,3R24,3SN8,3SNA,3SNB,3SNC,3SND,3SNE,3SZN…	Replicase polyprotein 1ab	R1AB_CVHSA	P0C6X7	P59641,Q6WGN0,Q7T697,Q808C0,Q80BV7,Q80BV8,Q80E51
19489	CCOC(=O)\C=C\[C@H](C[C@@H]1CCNC1=O)NC(=O)[C@@H](CC(=O)[C@@H](NC(=O)OCc1ccccc1)C(C)C)Cc1ccc(F)cc1	InChI=1/C34H42FN3O7/c1-4-44-30(40)15-14-28(19-25-16-17-36-32(25)41)37-33(42)26(18-23-10-12-27(35)13-11-23)20-29(39)31(22(2)3)38-34(43)45-21-24-8-6-5-7-9-24/h5-15,22,25-26,28,31H,4,16-21H2,1-3H3,(H,36,41)(H,37,42)(H,38,43)/b15-14+/t25-,26+,28+,31-/s2	NPKSFKZRNUBNHK-YBKVWULKNA-N	11244	AG7088 analogue 1b::ethyl (2E,4S)-4-[(2R,5S)-5-{[(benzyloxy)carbonyl]amino}-2-[(4-fluorophenyl)methyl]-6-methyl-4-oxoheptanamido]-5-[(3S)-2-oxopyrrolidin-3-yl]pent-2-enoate	3C-like proteinase (3CL-PRO)	Human SARS coronavirus		>100000					7	25.00 C	Curated from the literature by BindingDB	10.1016/j.bmc.2005.05.065	15994085			Shie, JJ; Fang, JM; Kuo, TH; Kuo, CJ; Liang, PH; Huang, HJ; Wu, YT; Jan, JT; Cheng, YS; Wong, CH	National Taiwan University	http://www.bindingdb.org/bind/chemsearch/marvin/MolStructure.jsp?monomerid=11244	http://www.bindingdb.org/jsp/dbsearch/PrimarySearch_ki.jsp?energyterm=kJ/mole&tag=pol&polymerid=4753&target=3C-like+proteinase+%283CL-PRO%29&column=ki&startPg=0&Increment=50&submit=Search	http://www.bindingdb.org/jsp/dbsearch/PrimarySearch_ki.jsp?energyterm=kJ/mole&tag=r21&monomerid=11244&enzyme=3C-like+proteinase+%283CL-PRO%29&column=ki&startPg=0&Increment=50&submit=Search			15959291	46509358						ZINC14947882	1	MESLVLGVNEKTHVQLSLPVLQVRDVLVRGFGDSVEEALSEAREHLKNGTCGLVELEKGVLPQLEQPYVFIKRSDALSTNHGHKVVELVAEMDGIQYGRSGITLGVLVPHVGETPIAYRNVLLRKNGNKGAGGHSYGIDLKSYDLGDELGTDPIEDYEQNWNTKHGSGALRELTRELNGGAVTRYVDNNFCGPDGYPLDCIKDFLARAGKSMCTLSEQLDYIESKRGVYCCRDHEHEIAWFTERSDKSYEHQTPFEIKSAKKFDTFKGECPKFVFPLNSKVKVIQPRVEKKKTEGFMGRIRSVYPVASPQECNNMHLSTLMKCNHCDEVSWQTCDFLKATCEHCGTENLVIEGPTTCGYLPTNAVVKMPCPACQDPEIGPEHSVADYHNHSNIETRLRK…	1Q2W,1QZ8,1UJ1,1UK2,1UK3,1UK4,1UW7,1WOF,1Z1I,2A5A,2A5I,2A5K,2ACF,2AHM,2ALV,2AMD,2AMQ,2BX3,2BX4,2C3S,2D2D,2DUC,2FAV,2FE8,2FYG,2G9T,2GA6,2GDT,2GRI,2GT7,2GT8,2GTB,2GX4,2GZ7,2GZ8,2GZ9,2H2Z,2HOB,2HSX,2IDY,2JZF,2K7X,2K87,2KAF,2LIZ,2OP9,2OZK,2RNK,2V6N,2VJ1,2XYQ,2XYR,2XYV,2Z3C,2Z3D,2Z3E,2Z94,2Z9G,2Z9J,2Z9K,2Z9L,2ZU4,2ZU5,3D62,3E91,3E9S,3EA7,3EA8,3EBN,3IWM,3M3V,3MJ5,3R24,3SN8,3SNA,3SNB,3SNC,3SND,3SNE,3SZN…	Replicase polyprotein 1ab	R1AB_CVHSA	P0C6X7	P59641,Q6WGN0,Q7T697,Q808C0,Q80BV7,Q80BV8,Q80E51
19490	CCOC(=O)\C=C\[C@H](C[C@@H]1CCNC1=O)NC(=O)[C@@H](CC(=O)[C@@H](NC(=O)c1cc(C)on1)C(C)C)Cc1ccccc1	InChI=1/C31H40N4O7/c1-5-41-27(37)12-11-24(17-22-13-14-32-29(22)38)33-30(39)23(16-21-9-7-6-8-10-21)18-26(36)28(19(2)3)34-31(40)25-15-20(4)42-35-25/h6-12,15,19,22-24,28H,5,13-14,16-18H2,1-4H3,(H,32,38)(H,33,39)(H,34,40)/b12-11+/t22-,23+,24+,28-/s2	DHTSLDPANDNYNQ-YSZFWMFTNA-N	11245	AG7088 analogue 1c::CHEMBL194398::ethyl (2E,4S)-4-[(2R,5S)-2-benzyl-6-methyl-5-[(5-methyl-1,2-oxazol-3-yl)formamido]-4-oxoheptanamido]-5-[(3S)-2-oxopyrrolidin-3-yl]pent-2-enoate	3C-like proteinase (3CL-PRO)	Human SARS coronavirus		>100000					7	25.00 C	Curated from the literature by BindingDB	10.1016/j.bmc.2005.05.065	15994085			Shie, JJ; Fang, JM; Kuo, TH; Kuo, CJ; Liang, PH; Huang, HJ; Wu, YT; Jan, JT; Cheng, YS; Wong, CH	National Taiwan University	http://www.bindingdb.org/bind/chemsearch/marvin/MolStructure.jsp?monomerid=11245	http://www.bindingdb.org/jsp/dbsearch/PrimarySearch_ki.jsp?energyterm=kJ/mole&tag=pol&polymerid=4753&target=3C-like+proteinase+%283CL-PRO%29&column=ki&startPg=0&Increment=50&submit=Search	http://www.bindingdb.org/jsp/dbsearch/PrimarySearch_ki.jsp?energyterm=kJ/mole&tag=r21&monomerid=11245&enzyme=3C-like+proteinase+%283CL-PRO%29&column=ki&startPg=0&Increment=50&submit=Search			11642725	46511796		CHEMBL194398				ZINC14947885	1	MESLVLGVNEKTHVQLSLPVLQVRDVLVRGFGDSVEEALSEAREHLKNGTCGLVELEKGVLPQLEQPYVFIKRSDALSTNHGHKVVELVAEMDGIQYGRSGITLGVLVPHVGETPIAYRNVLLRKNGNKGAGGHSYGIDLKSYDLGDELGTDPIEDYEQNWNTKHGSGALRELTRELNGGAVTRYVDNNFCGPDGYPLDCIKDFLARAGKSMCTLSEQLDYIESKRGVYCCRDHEHEIAWFTERSDKSYEHQTPFEIKSAKKFDTFKGECPKFVFPLNSKVKVIQPRVEKKKTEGFMGRIRSVYPVASPQECNNMHLSTLMKCNHCDEVSWQTCDFLKATCEHCGTENLVIEGPTTCGYLPTNAVVKMPCPACQDPEIGPEHSVADYHNHSNIETRLRK…	1Q2W,1QZ8,1UJ1,1UK2,1UK3,1UK4,1UW7,1WOF,1Z1I,2A5A,2A5I,2A5K,2ACF,2AHM,2ALV,2AMD,2AMQ,2BX3,2BX4,2C3S,2D2D,2DUC,2FAV,2FE8,2FYG,2G9T,2GA6,2GDT,2GRI,2GT7,2GT8,2GTB,2GX4,2GZ7,2GZ8,2GZ9,2H2Z,2HOB,2HSX,2IDY,2JZF,2K7X,2K87,2KAF,2LIZ,2OP9,2OZK,2RNK,2V6N,2VJ1,2XYQ,2XYR,2XYV,2Z3C,2Z3D,2Z3E,2Z94,2Z9G,2Z9J,2Z9K,2Z9L,2ZU4,2ZU5,3D62,3E91,3E9S,3EA7,3EA8,3EBN,3IWM,3M3V,3MJ5,3R24,3SN8,3SNA,3SNB,3SNC,3SND,3SNE,3SZN…	Replicase polyprotein 1ab	R1AB_CVHSA	P0C6X7	P59641,Q6WGN0,Q7T697,Q808C0,Q80BV7,Q80BV8,Q80E51
19491	CCOC(=O)\C=C\[C@H](C[C@@H]1CCNC1=O)NC(=O)[C@@H](CC(=O)[C@@H](NC(=O)OCc1ccccc1)C(C)C)Cc1ccccc1	InChI=1/C34H43N3O7/c1-4-43-30(39)16-15-28(20-26-17-18-35-32(26)40)36-33(41)27(19-24-11-7-5-8-12-24)21-29(38)31(23(2)3)37-34(42)44-22-25-13-9-6-10-14-25/h5-16,23,26-28,31H,4,17-22H2,1-3H3,(H,35,40)(H,36,41)(H,37,42)/b16-15+/t26-,27+,28+,31-/s2	NNUSBUJYBPVXNX-YPNNOSNVNA-N	11246	AG7088 analogue 1d::ethyl (2E,4S)-4-[(2R,5S)-2-benzyl-5-{[(benzyloxy)carbonyl]amino}-6-methyl-4-oxoheptanamido]-5-[(3S)-2-oxopyrrolidin-3-yl]pent-2-enoate	3C-like proteinase (3CL-PRO)	Human SARS coronavirus		>100000					7	25.00 C	Curated from the literature by BindingDB	10.1016/j.bmc.2005.05.065	15994085			Shie, JJ; Fang, JM; Kuo, TH; Kuo, CJ; Liang, PH; Huang, HJ; Wu, YT; Jan, JT; Cheng, YS; Wong, CH	National Taiwan University	http://www.bindingdb.org/bind/chemsearch/marvin/MolStructure.jsp?monomerid=11246	http://www.bindingdb.org/jsp/dbsearch/PrimarySearch_ki.jsp?energyterm=kJ/mole&tag=pol&polymerid=4753&target=3C-like+proteinase+%283CL-PRO%29&column=ki&startPg=0&Increment=50&submit=Search	http://www.bindingdb.org/jsp/dbsearch/PrimarySearch_ki.jsp?energyterm=kJ/mole&tag=r21&monomerid=11246&enzyme=3C-like+proteinase+%283CL-PRO%29&column=ki&startPg=0&Increment=50&submit=Search			15959292	46509359						ZINC14947888	1	MESLVLGVNEKTHVQLSLPVLQVRDVLVRGFGDSVEEALSEAREHLKNGTCGLVELEKGVLPQLEQPYVFIKRSDALSTNHGHKVVELVAEMDGIQYGRSGITLGVLVPHVGETPIAYRNVLLRKNGNKGAGGHSYGIDLKSYDLGDELGTDPIEDYEQNWNTKHGSGALRELTRELNGGAVTRYVDNNFCGPDGYPLDCIKDFLARAGKSMCTLSEQLDYIESKRGVYCCRDHEHEIAWFTERSDKSYEHQTPFEIKSAKKFDTFKGECPKFVFPLNSKVKVIQPRVEKKKTEGFMGRIRSVYPVASPQECNNMHLSTLMKCNHCDEVSWQTCDFLKATCEHCGTENLVIEGPTTCGYLPTNAVVKMPCPACQDPEIGPEHSVADYHNHSNIETRLRK…	1Q2W,1QZ8,1UJ1,1UK2,1UK3,1UK4,1UW7,1WOF,1Z1I,2A5A,2A5I,2A5K,2ACF,2AHM,2ALV,2AMD,2AMQ,2BX3,2BX4,2C3S,2D2D,2DUC,2FAV,2FE8,2FYG,2G9T,2GA6,2GDT,2GRI,2GT7,2GT8,2GTB,2GX4,2GZ7,2GZ8,2GZ9,2H2Z,2HOB,2HSX,2IDY,2JZF,2K7X,2K87,2KAF,2LIZ,2OP9,2OZK,2RNK,2V6N,2VJ1,2XYQ,2XYR,2XYV,2Z3C,2Z3D,2Z3E,2Z94,2Z9G,2Z9J,2Z9K,2Z9L,2ZU4,2ZU5,3D62,3E91,3E9S,3EA7,3EA8,3EBN,3IWM,3M3V,3MJ5,3R24,3SN8,3SNA,3SNB,3SNC,3SND,3SNE,3SZN…	Replicase polyprotein 1ab	R1AB_CVHSA	P0C6X7	P59641,Q6WGN0,Q7T697,Q808C0,Q80BV7,Q80BV8,Q80E51
19492	CCOC(=O)\C=C\[C@H](C[C@@H]1CCNC1=O)NC(=O)[C@H](Cc1ccc(F)cc1)NC(=O)[C@@H](NC(=O)c1cc(C)on1)C(C)C	InChI=1/C30H38FN5O7/c1-5-42-25(37)11-10-22(16-20-12-13-32-27(20)38)33-28(39)23(15-19-6-8-21(31)9-7-19)34-30(41)26(17(2)3)35-29(40)24-14-18(4)43-36-24/h6-11,14,17,20,22-23,26H,5,12-13,15-16H2,1-4H3,(H,32,38)(H,33,39)(H,34,41)(H,35,40)/b11-10+/t20-,22+,23-,26-/s2	JSJRYDPMCHPLOL-MYLHEQDVNA-N	11229	AG7088 analogue 2a::CHEMBL20636::N-[(5-methylisoxazol-3-yl)carbonyl]-L-valyl-N-((1S,2E)-4-ethoxy-4-oxo-1-{[(3S)-2-oxopyrrolidin-3-yl]methyl}but-2-enyl)-4-fluoro-L-phenylalaninamide::TG-0205221 Analogue 1::ethyl (2E,4S)-4-[(2S)-3-(4-fluorophenyl)-2-[(2S)-3-methyl-2-[(5-methyl-1,2-oxazol-3-yl)formamido]butanamido]propanamido]-5-[(3S)-2-oxopyrrolidin-3-yl]pent-2-enoate	3C-like proteinase (3CL-PRO)	Human SARS coronavirus		>100000					7	25.00 C	Curated from the literature by BindingDB	10.1016/j.bmc.2005.05.065	15994085			Shie, JJ; Fang, JM; Kuo, TH; Kuo, CJ; Liang, PH; Huang, HJ; Wu, YT; Jan, JT; Cheng, YS; Wong, CH	National Taiwan University	http://www.bindingdb.org/bind/chemsearch/marvin/MolStructure.jsp?monomerid=11229	http://www.bindingdb.org/jsp/dbsearch/PrimarySearch_ki.jsp?energyterm=kJ/mole&tag=pol&polymerid=4753&target=3C-like+proteinase+%283CL-PRO%29&column=ki&startPg=0&Increment=50&submit=Search	http://www.bindingdb.org/jsp/dbsearch/PrimarySearch_ki.jsp?energyterm=kJ/mole&tag=r21&monomerid=11229&enzyme=3C-like+proteinase+%283CL-PRO%29&column=ki&startPg=0&Increment=50&submit=Search			6476897	46511782		CHEMBL20636				ZINC14947852	1	MESLVLGVNEKTHVQLSLPVLQVRDVLVRGFGDSVEEALSEAREHLKNGTCGLVELEKGVLPQLEQPYVFIKRSDALSTNHGHKVVELVAEMDGIQYGRSGITLGVLVPHVGETPIAYRNVLLRKNGNKGAGGHSYGIDLKSYDLGDELGTDPIEDYEQNWNTKHGSGALRELTRELNGGAVTRYVDNNFCGPDGYPLDCIKDFLARAGKSMCTLSEQLDYIESKRGVYCCRDHEHEIAWFTERSDKSYEHQTPFEIKSAKKFDTFKGECPKFVFPLNSKVKVIQPRVEKKKTEGFMGRIRSVYPVASPQECNNMHLSTLMKCNHCDEVSWQTCDFLKATCEHCGTENLVIEGPTTCGYLPTNAVVKMPCPACQDPEIGPEHSVADYHNHSNIETRLRK…	1Q2W,1QZ8,1UJ1,1UK2,1UK3,1UK4,1UW7,1WOF,1Z1I,2A5A,2A5I,2A5K,2ACF,2AHM,2ALV,2AMD,2AMQ,2BX3,2BX4,2C3S,2D2D,2DUC,2FAV,2FE8,2FYG,2G9T,2GA6,2GDT,2GRI,2GT7,2GT8,2GTB,2GX4,2GZ7,2GZ8,2GZ9,2H2Z,2HOB,2HSX,2IDY,2JZF,2K7X,2K87,2KAF,2LIZ,2OP9,2OZK,2RNK,2V6N,2VJ1,2XYQ,2XYR,2XYV,2Z3C,2Z3D,2Z3E,2Z94,2Z9G,2Z9J,2Z9K,2Z9L,2ZU4,2ZU5,3D62,3E91,3E9S,3EA7,3EA8,3EBN,3IWM,3M3V,3MJ5,3R24,3SN8,3SNA,3SNB,3SNC,3SND,3SNE,3SZN…	Replicase polyprotein 1ab	R1AB_CVHSA	P0C6X7	P59641,Q6WGN0,Q7T697,Q808C0,Q80BV7,Q80BV8,Q80E51
19493	CCOC(=O)\C=C\[C@H](C[C@@H]1CCNC1=O)NC(=O)[C@H](Cc1ccc(F)cc1)NC(=O)[C@@H](NC(=O)OCc1ccccc1)C(C)C	InChI=1/C33H41FN4O7/c1-4-44-28(39)15-14-26(19-24-16-17-35-30(24)40)36-31(41)27(18-22-10-12-25(34)13-11-22)37-32(42)29(21(2)3)38-33(43)45-20-23-8-6-5-7-9-23/h5-15,21,24,26-27,29H,4,16-20H2,1-3H3,(H,35,40)(H,36,41)(H,37,42)(H,38,43)/b15-14+/t24-,26+,27-,29-/s2	DPLBSAHOVYLEQM-AJHGJMMANA-N	11248	AG7088 analogue 2b::ethyl (2E,4S)-4-[(2S)-2-[(2S)-2-{[(benzyloxy)carbonyl]amino}-3-methylbutanamido]-3-(4-fluorophenyl)propanamido]-5-[(3S)-2-oxopyrrolidin-3-yl]pent-2-enoate	3C-like proteinase (3CL-PRO)	Human SARS coronavirus		>100000					7	25.00 C	Curated from the literature by BindingDB	10.1016/j.bmc.2005.05.065	15994085			Shie, JJ; Fang, JM; Kuo, TH; Kuo, CJ; Liang, PH; Huang, HJ; Wu, YT; Jan, JT; Cheng, YS; Wong, CH	National Taiwan University	http://www.bindingdb.org/bind/chemsearch/marvin/MolStructure.jsp?monomerid=11248	http://www.bindingdb.org/jsp/dbsearch/PrimarySearch_ki.jsp?energyterm=kJ/mole&tag=pol&polymerid=4753&target=3C-like+proteinase+%283CL-PRO%29&column=ki&startPg=0&Increment=50&submit=Search	http://www.bindingdb.org/jsp/dbsearch/PrimarySearch_ki.jsp?energyterm=kJ/mole&tag=r21&monomerid=11248&enzyme=3C-like+proteinase+%283CL-PRO%29&column=ki&startPg=0&Increment=50&submit=Search			15959293	46511797						ZINC14947892	1	MESLVLGVNEKTHVQLSLPVLQVRDVLVRGFGDSVEEALSEAREHLKNGTCGLVELEKGVLPQLEQPYVFIKRSDALSTNHGHKVVELVAEMDGIQYGRSGITLGVLVPHVGETPIAYRNVLLRKNGNKGAGGHSYGIDLKSYDLGDELGTDPIEDYEQNWNTKHGSGALRELTRELNGGAVTRYVDNNFCGPDGYPLDCIKDFLARAGKSMCTLSEQLDYIESKRGVYCCRDHEHEIAWFTERSDKSYEHQTPFEIKSAKKFDTFKGECPKFVFPLNSKVKVIQPRVEKKKTEGFMGRIRSVYPVASPQECNNMHLSTLMKCNHCDEVSWQTCDFLKATCEHCGTENLVIEGPTTCGYLPTNAVVKMPCPACQDPEIGPEHSVADYHNHSNIETRLRK…	1Q2W,1QZ8,1UJ1,1UK2,1UK3,1UK4,1UW7,1WOF,1Z1I,2A5A,2A5I,2A5K,2ACF,2AHM,2ALV,2AMD,2AMQ,2BX3,2BX4,2C3S,2D2D,2DUC,2FAV,2FE8,2FYG,2G9T,2GA6,2GDT,2GRI,2GT7,2GT8,2GTB,2GX4,2GZ7,2GZ8,2GZ9,2H2Z,2HOB,2HSX,2IDY,2JZF,2K7X,2K87,2KAF,2LIZ,2OP9,2OZK,2RNK,2V6N,2VJ1,2XYQ,2XYR,2XYV,2Z3C,2Z3D,2Z3E,2Z94,2Z9G,2Z9J,2Z9K,2Z9L,2ZU4,2ZU5,3D62,3E91,3E9S,3EA7,3EA8,3EBN,3IWM,3M3V,3MJ5,3R24,3SN8,3SNA,3SNB,3SNC,3SND,3SNE,3SZN…	Replicase polyprotein 1ab	R1AB_CVHSA	P0C6X7	P59641,Q6WGN0,Q7T697,Q808C0,Q80BV7,Q80BV8,Q80E51
19494	CCOC(=O)\C=C\[C@H](C[C@@H]1CCNC1=O)NC(=O)[C@H](Cc1ccccc1)NC(=O)[C@@H](NC(=O)c1cc(C)on1)C(C)C	InChI=1/C30H39N5O7/c1-5-41-25(36)12-11-22(17-21-13-14-31-27(21)37)32-28(38)23(16-20-9-7-6-8-10-20)33-30(40)26(18(2)3)34-29(39)24-15-19(4)42-35-24/h6-12,15,18,21-23,26H,5,13-14,16-17H2,1-4H3,(H,31,37)(H,32,38)(H,33,40)(H,34,39)/b12-11+/t21-,22+,23-,26-/s2	PANGWSCMXDVPFP-RFNRSQCDNA-N	11249	AG7088 analogue 2c::ethyl (2E,4S)-4-[(2S)-2-[(2S)-3-methyl-2-[(5-methyl-1,2-oxazol-3-yl)formamido]butanamido]-3-phenylpropanamido]-5-[(3S)-2-oxopyrrolidin-3-yl]pent-2-enoate	3C-like proteinase (3CL-PRO)	Human SARS coronavirus		80000					7	25.00 C	Curated from the literature by BindingDB	10.1016/j.bmc.2005.05.065	15994085			Shie, JJ; Fang, JM; Kuo, TH; Kuo, CJ; Liang, PH; Huang, HJ; Wu, YT; Jan, JT; Cheng, YS; Wong, CH	National Taiwan University	http://www.bindingdb.org/bind/chemsearch/marvin/MolStructure.jsp?monomerid=11249	http://www.bindingdb.org/jsp/dbsearch/PrimarySearch_ki.jsp?energyterm=kJ/mole&tag=pol&polymerid=4753&target=3C-like+proteinase+%283CL-PRO%29&column=ki&startPg=0&Increment=50&submit=Search	http://www.bindingdb.org/jsp/dbsearch/PrimarySearch_ki.jsp?energyterm=kJ/mole&tag=r21&monomerid=11249&enzyme=3C-like+proteinase+%283CL-PRO%29&column=ki&startPg=0&Increment=50&submit=Search			15956553	46511798						ZINC14947896	1	MESLVLGVNEKTHVQLSLPVLQVRDVLVRGFGDSVEEALSEAREHLKNGTCGLVELEKGVLPQLEQPYVFIKRSDALSTNHGHKVVELVAEMDGIQYGRSGITLGVLVPHVGETPIAYRNVLLRKNGNKGAGGHSYGIDLKSYDLGDELGTDPIEDYEQNWNTKHGSGALRELTRELNGGAVTRYVDNNFCGPDGYPLDCIKDFLARAGKSMCTLSEQLDYIESKRGVYCCRDHEHEIAWFTERSDKSYEHQTPFEIKSAKKFDTFKGECPKFVFPLNSKVKVIQPRVEKKKTEGFMGRIRSVYPVASPQECNNMHLSTLMKCNHCDEVSWQTCDFLKATCEHCGTENLVIEGPTTCGYLPTNAVVKMPCPACQDPEIGPEHSVADYHNHSNIETRLRK…	1Q2W,1QZ8,1UJ1,1UK2,1UK3,1UK4,1UW7,1WOF,1Z1I,2A5A,2A5I,2A5K,2ACF,2AHM,2ALV,2AMD,2AMQ,2BX3,2BX4,2C3S,2D2D,2DUC,2FAV,2FE8,2FYG,2G9T,2GA6,2GDT,2GRI,2GT7,2GT8,2GTB,2GX4,2GZ7,2GZ8,2GZ9,2H2Z,2HOB,2HSX,2IDY,2JZF,2K7X,2K87,2KAF,2LIZ,2OP9,2OZK,2RNK,2V6N,2VJ1,2XYQ,2XYR,2XYV,2Z3C,2Z3D,2Z3E,2Z94,2Z9G,2Z9J,2Z9K,2Z9L,2ZU4,2ZU5,3D62,3E91,3E9S,3EA7,3EA8,3EBN,3IWM,3M3V,3MJ5,3R24,3SN8,3SNA,3SNB,3SNC,3SND,3SNE,3SZN…	Replicase polyprotein 1ab	R1AB_CVHSA	P0C6X7	P59641,Q6WGN0,Q7T697,Q808C0,Q80BV7,Q80BV8,Q80E51
19495	CCOC(=O)\C=C\[C@H](C[C@@H]1CCNC1=O)NC(=O)[C@H](Cc1ccccc1)NC(=O)[C@@H](NC(=O)OCc1ccccc1)C(C)C	InChI=1/C33H42N4O7/c1-4-43-28(38)16-15-26(20-25-17-18-34-30(25)39)35-31(40)27(19-23-11-7-5-8-12-23)36-32(41)29(22(2)3)37-33(42)44-21-24-13-9-6-10-14-24/h5-16,22,25-27,29H,4,17-21H2,1-3H3,(H,34,39)(H,35,40)(H,36,41)(H,37,42)/b16-15+/t25-,26+,27-,29-/s2	MQOSRSSZYUXZNH-VRMPVSCUNA-N	11230	AG7088 analogue 2d::CHEMBL277716::N-[(benzyloxy)carbonyl]-L-valyl-N-((1S,2E)-4-ethoxy-4-oxo-1-{[(3S)-2-oxopyrrolidin-3-yl]methyl}but-2-enyl)-L-phenylalaninamide::TG-0205221 Analogue 2::ethyl (2E,4S)-4-[(2S)-2-[(2S)-2-{[(benzyloxy)carbonyl]amino}-3-methylbutanamido]-3-phenylpropanamido]-5-[(3S)-2-oxopyrrolidin-3-yl]pent-2-enoate	3C-like proteinase (3CL-PRO)	Human SARS coronavirus		85000					7	25.00 C	Curated from the literature by BindingDB	10.1016/j.bmc.2005.05.065	15994085			Shie, JJ; Fang, JM; Kuo, TH; Kuo, CJ; Liang, PH; Huang, HJ; Wu, YT; Jan, JT; Cheng, YS; Wong, CH	National Taiwan University	http://www.bindingdb.org/bind/chemsearch/marvin/MolStructure.jsp?monomerid=11230	http://www.bindingdb.org/jsp/dbsearch/PrimarySearch_ki.jsp?energyterm=kJ/mole&tag=pol&polymerid=4753&target=3C-like+proteinase+%283CL-PRO%29&column=ki&startPg=0&Increment=50&submit=Search	http://www.bindingdb.org/jsp/dbsearch/PrimarySearch_ki.jsp?energyterm=kJ/mole&tag=r21&monomerid=11230&enzyme=3C-like+proteinase+%283CL-PRO%29&column=ki&startPg=0&Increment=50&submit=Search			6478229	46511783		CHEMBL277716				ZINC14947855	1	MESLVLGVNEKTHVQLSLPVLQVRDVLVRGFGDSVEEALSEAREHLKNGTCGLVELEKGVLPQLEQPYVFIKRSDALSTNHGHKVVELVAEMDGIQYGRSGITLGVLVPHVGETPIAYRNVLLRKNGNKGAGGHSYGIDLKSYDLGDELGTDPIEDYEQNWNTKHGSGALRELTRELNGGAVTRYVDNNFCGPDGYPLDCIKDFLARAGKSMCTLSEQLDYIESKRGVYCCRDHEHEIAWFTERSDKSYEHQTPFEIKSAKKFDTFKGECPKFVFPLNSKVKVIQPRVEKKKTEGFMGRIRSVYPVASPQECNNMHLSTLMKCNHCDEVSWQTCDFLKATCEHCGTENLVIEGPTTCGYLPTNAVVKMPCPACQDPEIGPEHSVADYHNHSNIETRLRK…	1Q2W,1QZ8,1UJ1,1UK2,1UK3,1UK4,1UW7,1WOF,1Z1I,2A5A,2A5I,2A5K,2ACF,2AHM,2ALV,2AMD,2AMQ,2BX3,2BX4,2C3S,2D2D,2DUC,2FAV,2FE8,2FYG,2G9T,2GA6,2GDT,2GRI,2GT7,2GT8,2GTB,2GX4,2GZ7,2GZ8,2GZ9,2H2Z,2HOB,2HSX,2IDY,2JZF,2K7X,2K87,2KAF,2LIZ,2OP9,2OZK,2RNK,2V6N,2VJ1,2XYQ,2XYR,2XYV,2Z3C,2Z3D,2Z3E,2Z94,2Z9G,2Z9J,2Z9K,2Z9L,2ZU4,2ZU5,3D62,3E91,3E9S,3EA7,3EA8,3EBN,3IWM,3M3V,3MJ5,3R24,3SN8,3SNA,3SNB,3SNC,3SND,3SNE,3SZN…	Replicase polyprotein 1ab	R1AB_CVHSA	P0C6X7	P59641,Q6WGN0,Q7T697,Q808C0,Q80BV7,Q80BV8,Q80E51
19496	CCOC(=O)\C=C\[C@H](Cc1ccccc1)NC(=O)[C@@H](CC(=O)[C@@H](NC(=O)c1cc(C)on1)C(C)C)Cc1ccc(F)cc1	InChI=1/C33H38FN3O6/c1-5-42-30(39)16-15-27(19-23-9-7-6-8-10-23)35-32(40)25(18-24-11-13-26(34)14-12-24)20-29(38)31(21(2)3)36-33(41)28-17-22(4)43-37-28/h6-17,21,25,27,31H,5,18-20H2,1-4H3,(H,35,40)(H,36,41)/b16-15+/t25-,27-,31+/s2	FCVVBRNWNKLOCV-DUUHKVIZNA-N	11251	AG7088 analogue 3a::ethyl (2E,4S)-4-[(2R,5S)-2-[(4-fluorophenyl)methyl]-6-methyl-5-[(5-methyl-1,2-oxazol-3-yl)formamido]-4-oxoheptanamido]-5-phenylpent-2-enoate	3C-like proteinase (3CL-PRO)	Human SARS coronavirus		39000					7	25.00 C	Curated from the literature by BindingDB	10.1016/j.bmc.2005.05.065	15994085			Shie, JJ; Fang, JM; Kuo, TH; Kuo, CJ; Liang, PH; Huang, HJ; Wu, YT; Jan, JT; Cheng, YS; Wong, CH	National Taiwan University	http://www.bindingdb.org/bind/chemsearch/marvin/MolStructure.jsp?monomerid=11251	http://www.bindingdb.org/jsp/dbsearch/PrimarySearch_ki.jsp?energyterm=kJ/mole&tag=pol&polymerid=4753&target=3C-like+proteinase+%283CL-PRO%29&column=ki&startPg=0&Increment=50&submit=Search	http://www.bindingdb.org/jsp/dbsearch/PrimarySearch_ki.jsp?energyterm=kJ/mole&tag=r21&monomerid=11251&enzyme=3C-like+proteinase+%283CL-PRO%29&column=ki&startPg=0&Increment=50&submit=Search			15959294	46511799						ZINC14947899	1	MESLVLGVNEKTHVQLSLPVLQVRDVLVRGFGDSVEEALSEAREHLKNGTCGLVELEKGVLPQLEQPYVFIKRSDALSTNHGHKVVELVAEMDGIQYGRSGITLGVLVPHVGETPIAYRNVLLRKNGNKGAGGHSYGIDLKSYDLGDELGTDPIEDYEQNWNTKHGSGALRELTRELNGGAVTRYVDNNFCGPDGYPLDCIKDFLARAGKSMCTLSEQLDYIESKRGVYCCRDHEHEIAWFTERSDKSYEHQTPFEIKSAKKFDTFKGECPKFVFPLNSKVKVIQPRVEKKKTEGFMGRIRSVYPVASPQECNNMHLSTLMKCNHCDEVSWQTCDFLKATCEHCGTENLVIEGPTTCGYLPTNAVVKMPCPACQDPEIGPEHSVADYHNHSNIETRLRK…	1Q2W,1QZ8,1UJ1,1UK2,1UK3,1UK4,1UW7,1WOF,1Z1I,2A5A,2A5I,2A5K,2ACF,2AHM,2ALV,2AMD,2AMQ,2BX3,2BX4,2C3S,2D2D,2DUC,2FAV,2FE8,2FYG,2G9T,2GA6,2GDT,2GRI,2GT7,2GT8,2GTB,2GX4,2GZ7,2GZ8,2GZ9,2H2Z,2HOB,2HSX,2IDY,2JZF,2K7X,2K87,2KAF,2LIZ,2OP9,2OZK,2RNK,2V6N,2VJ1,2XYQ,2XYR,2XYV,2Z3C,2Z3D,2Z3E,2Z94,2Z9G,2Z9J,2Z9K,2Z9L,2ZU4,2ZU5,3D62,3E91,3E9S,3EA7,3EA8,3EBN,3IWM,3M3V,3MJ5,3R24,3SN8,3SNA,3SNB,3SNC,3SND,3SNE,3SZN…	Replicase polyprotein 1ab	R1AB_CVHSA	P0C6X7	P59641,Q6WGN0,Q7T697,Q808C0,Q80BV7,Q80BV8,Q80E51
19497	CCOC(=O)\C=C\[C@H](Cc1ccccc1)NC(=O)[C@@H](CC(=O)[C@@H](NC(=O)OCc1ccccc1)C(C)C)Cc1ccc(F)cc1	InChI=1/C36H41FN2O6/c1-4-44-33(41)20-19-31(22-26-11-7-5-8-12-26)38-35(42)29(21-27-15-17-30(37)18-16-27)23-32(40)34(25(2)3)39-36(43)45-24-28-13-9-6-10-14-28/h5-20,25,29,31,34H,4,21-24H2,1-3H3,(H,38,42)(H,39,43)/b20-19+/t29-,31-,34+/s2	NZBCTRXETOVYTR-GXTKFTMCNA-N	11252	AG7088 analogue 3b::ethyl (2E,4S)-4-[(2R,5S)-5-{[(benzyloxy)carbonyl]amino}-2-[(4-fluorophenyl)methyl]-6-methyl-4-oxoheptanamido]-5-phenylpent-2-enoate	3C-like proteinase (3CL-PRO)	Human SARS coronavirus		31000					7	25.00 C	Curated from the literature by BindingDB	10.1016/j.bmc.2005.05.065	15994085			Shie, JJ; Fang, JM; Kuo, TH; Kuo, CJ; Liang, PH; Huang, HJ; Wu, YT; Jan, JT; Cheng, YS; Wong, CH	National Taiwan University	http://www.bindingdb.org/bind/chemsearch/marvin/MolStructure.jsp?monomerid=11252	http://www.bindingdb.org/jsp/dbsearch/PrimarySearch_ki.jsp?energyterm=kJ/mole&tag=pol&polymerid=4753&target=3C-like+proteinase+%283CL-PRO%29&column=ki&startPg=0&Increment=50&submit=Search	http://www.bindingdb.org/jsp/dbsearch/PrimarySearch_ki.jsp?energyterm=kJ/mole&tag=r21&monomerid=11252&enzyme=3C-like+proteinase+%283CL-PRO%29&column=ki&startPg=0&Increment=50&submit=Search			15959295	46511800						ZINC14947903	1	MESLVLGVNEKTHVQLSLPVLQVRDVLVRGFGDSVEEALSEAREHLKNGTCGLVELEKGVLPQLEQPYVFIKRSDALSTNHGHKVVELVAEMDGIQYGRSGITLGVLVPHVGETPIAYRNVLLRKNGNKGAGGHSYGIDLKSYDLGDELGTDPIEDYEQNWNTKHGSGALRELTRELNGGAVTRYVDNNFCGPDGYPLDCIKDFLARAGKSMCTLSEQLDYIESKRGVYCCRDHEHEIAWFTERSDKSYEHQTPFEIKSAKKFDTFKGECPKFVFPLNSKVKVIQPRVEKKKTEGFMGRIRSVYPVASPQECNNMHLSTLMKCNHCDEVSWQTCDFLKATCEHCGTENLVIEGPTTCGYLPTNAVVKMPCPACQDPEIGPEHSVADYHNHSNIETRLRK…	1Q2W,1QZ8,1UJ1,1UK2,1UK3,1UK4,1UW7,1WOF,1Z1I,2A5A,2A5I,2A5K,2ACF,2AHM,2ALV,2AMD,2AMQ,2BX3,2BX4,2C3S,2D2D,2DUC,2FAV,2FE8,2FYG,2G9T,2GA6,2GDT,2GRI,2GT7,2GT8,2GTB,2GX4,2GZ7,2GZ8,2GZ9,2H2Z,2HOB,2HSX,2IDY,2JZF,2K7X,2K87,2KAF,2LIZ,2OP9,2OZK,2RNK,2V6N,2VJ1,2XYQ,2XYR,2XYV,2Z3C,2Z3D,2Z3E,2Z94,2Z9G,2Z9J,2Z9K,2Z9L,2ZU4,2ZU5,3D62,3E91,3E9S,3EA7,3EA8,3EBN,3IWM,3M3V,3MJ5,3R24,3SN8,3SNA,3SNB,3SNC,3SND,3SNE,3SZN…	Replicase polyprotein 1ab	R1AB_CVHSA	P0C6X7	P59641,Q6WGN0,Q7T697,Q808C0,Q80BV7,Q80BV8,Q80E51
19498	CCOC(=O)\C=C\[C@H](Cc1ccccc1)NC(=O)[C@@H](CC(=O)[C@@H](NC(=O)c1cc(C)on1)C(C)C)Cc1ccccc1	InChI=1/C33H39N3O6/c1-5-41-30(38)17-16-27(20-25-14-10-7-11-15-25)34-32(39)26(19-24-12-8-6-9-13-24)21-29(37)31(22(2)3)35-33(40)28-18-23(4)42-36-28/h6-18,22,26-27,31H,5,19-21H2,1-4H3,(H,34,39)(H,35,40)/b17-16+/t26-,27-,31+/s2	ZNJXQWIARYSQOT-QTHZEVOVNA-N	11253	AG7088 analogue 3c::ethyl (2E,4S)-4-[(2R,5S)-2-benzyl-6-methyl-5-[(5-methyl-1,2-oxazol-3-yl)formamido]-4-oxoheptanamido]-5-phenylpent-2-enoate	3C-like proteinase (3CL-PRO)	Human SARS coronavirus		13000					7	25.00 C	Curated from the literature by BindingDB	10.1016/j.bmc.2005.05.065	15994085			Shie, JJ; Fang, JM; Kuo, TH; Kuo, CJ; Liang, PH; Huang, HJ; Wu, YT; Jan, JT; Cheng, YS; Wong, CH	National Taiwan University	http://www.bindingdb.org/bind/chemsearch/marvin/MolStructure.jsp?monomerid=11253	http://www.bindingdb.org/jsp/dbsearch/PrimarySearch_ki.jsp?energyterm=kJ/mole&tag=pol&polymerid=4753&target=3C-like+proteinase+%283CL-PRO%29&column=ki&startPg=0&Increment=50&submit=Search	http://www.bindingdb.org/jsp/dbsearch/PrimarySearch_ki.jsp?energyterm=kJ/mole&tag=r21&monomerid=11253&enzyme=3C-like+proteinase+%283CL-PRO%29&column=ki&startPg=0&Increment=50&submit=Search			15959296	46511801						ZINC14947906	1	MESLVLGVNEKTHVQLSLPVLQVRDVLVRGFGDSVEEALSEAREHLKNGTCGLVELEKGVLPQLEQPYVFIKRSDALSTNHGHKVVELVAEMDGIQYGRSGITLGVLVPHVGETPIAYRNVLLRKNGNKGAGGHSYGIDLKSYDLGDELGTDPIEDYEQNWNTKHGSGALRELTRELNGGAVTRYVDNNFCGPDGYPLDCIKDFLARAGKSMCTLSEQLDYIESKRGVYCCRDHEHEIAWFTERSDKSYEHQTPFEIKSAKKFDTFKGECPKFVFPLNSKVKVIQPRVEKKKTEGFMGRIRSVYPVASPQECNNMHLSTLMKCNHCDEVSWQTCDFLKATCEHCGTENLVIEGPTTCGYLPTNAVVKMPCPACQDPEIGPEHSVADYHNHSNIETRLRK…	1Q2W,1QZ8,1UJ1,1UK2,1UK3,1UK4,1UW7,1WOF,1Z1I,2A5A,2A5I,2A5K,2ACF,2AHM,2ALV,2AMD,2AMQ,2BX3,2BX4,2C3S,2D2D,2DUC,2FAV,2FE8,2FYG,2G9T,2GA6,2GDT,2GRI,2GT7,2GT8,2GTB,2GX4,2GZ7,2GZ8,2GZ9,2H2Z,2HOB,2HSX,2IDY,2JZF,2K7X,2K87,2KAF,2LIZ,2OP9,2OZK,2RNK,2V6N,2VJ1,2XYQ,2XYR,2XYV,2Z3C,2Z3D,2Z3E,2Z94,2Z9G,2Z9J,2Z9K,2Z9L,2ZU4,2ZU5,3D62,3E91,3E9S,3EA7,3EA8,3EBN,3IWM,3M3V,3MJ5,3R24,3SN8,3SNA,3SNB,3SNC,3SND,3SNE,3SZN…	Replicase polyprotein 1ab	R1AB_CVHSA	P0C6X7	P59641,Q6WGN0,Q7T697,Q808C0,Q80BV7,Q80BV8,Q80E51
19499	CCOC(=O)\C=C\[C@H](Cc1ccccc1)NC(=O)[C@@H](CC(=O)[C@@H](NC(=O)OCc1ccccc1)C(C)C)Cc1ccccc1	InChI=1/C36H42N2O6/c1-4-43-33(40)21-20-31(23-28-16-10-6-11-17-28)37-35(41)30(22-27-14-8-5-9-15-27)24-32(39)34(26(2)3)38-36(42)44-25-29-18-12-7-13-19-29/h5-21,26,30-31,34H,4,22-25H2,1-3H3,(H,37,41)(H,38,42)/b21-20+/t30-,31-,34+/s2	DUDXNMNSLLNROX-YXVPHTJMNA-N	11254	AG7088 analogue 3d::ethyl (2E,4S)-4-[(2R,5S)-2-benzyl-5-{[(benzyloxy)carbonyl]amino}-6-methyl-4-oxoheptanamido]-5-phenylpent-2-enoate	3C-like proteinase (3CL-PRO)	Human SARS coronavirus		38000					7	25.00 C	Curated from the literature by BindingDB	10.1016/j.bmc.2005.05.065	15994085			Shie, JJ; Fang, JM; Kuo, TH; Kuo, CJ; Liang, PH; Huang, HJ; Wu, YT; Jan, JT; Cheng, YS; Wong, CH	National Taiwan University	http://www.bindingdb.org/bind/chemsearch/marvin/MolStructure.jsp?monomerid=11254	http://www.bindingdb.org/jsp/dbsearch/PrimarySearch_ki.jsp?energyterm=kJ/mole&tag=pol&polymerid=4753&target=3C-like+proteinase+%283CL-PRO%29&column=ki&startPg=0&Increment=50&submit=Search	http://www.bindingdb.org/jsp/dbsearch/PrimarySearch_ki.jsp?energyterm=kJ/mole&tag=r21&monomerid=11254&enzyme=3C-like+proteinase+%283CL-PRO%29&column=ki&startPg=0&Increment=50&submit=Search			15959297	46511802						ZINC14947909	1	MESLVLGVNEKTHVQLSLPVLQVRDVLVRGFGDSVEEALSEAREHLKNGTCGLVELEKGVLPQLEQPYVFIKRSDALSTNHGHKVVELVAEMDGIQYGRSGITLGVLVPHVGETPIAYRNVLLRKNGNKGAGGHSYGIDLKSYDLGDELGTDPIEDYEQNWNTKHGSGALRELTRELNGGAVTRYVDNNFCGPDGYPLDCIKDFLARAGKSMCTLSEQLDYIESKRGVYCCRDHEHEIAWFTERSDKSYEHQTPFEIKSAKKFDTFKGECPKFVFPLNSKVKVIQPRVEKKKTEGFMGRIRSVYPVASPQECNNMHLSTLMKCNHCDEVSWQTCDFLKATCEHCGTENLVIEGPTTCGYLPTNAVVKMPCPACQDPEIGPEHSVADYHNHSNIETRLRK…	1Q2W,1QZ8,1UJ1,1UK2,1UK3,1UK4,1UW7,1WOF,1Z1I,2A5A,2A5I,2A5K,2ACF,2AHM,2ALV,2AMD,2AMQ,2BX3,2BX4,2C3S,2D2D,2DUC,2FAV,2FE8,2FYG,2G9T,2GA6,2GDT,2GRI,2GT7,2GT8,2GTB,2GX4,2GZ7,2GZ8,2GZ9,2H2Z,2HOB,2HSX,2IDY,2JZF,2K7X,2K87,2KAF,2LIZ,2OP9,2OZK,2RNK,2V6N,2VJ1,2XYQ,2XYR,2XYV,2Z3C,2Z3D,2Z3E,2Z94,2Z9G,2Z9J,2Z9K,2Z9L,2ZU4,2ZU5,3D62,3E91,3E9S,3EA7,3EA8,3EBN,3IWM,3M3V,3MJ5,3R24,3SN8,3SNA,3SNB,3SNC,3SND,3SNE,3SZN…	Replicase polyprotein 1ab	R1AB_CVHSA	P0C6X7	P59641,Q6WGN0,Q7T697,Q808C0,Q80BV7,Q80BV8,Q80E51
19500	CCOC(=O)\C=C\[C@H](Cc1ccccc1)NC(=O)[C@H](Cc1ccc(F)cc1)NC(=O)[C@@H](NC(=O)c1cc(C)on1)C(C)C	InChI=1/C32H37FN4O6/c1-5-42-28(38)16-15-25(18-22-9-7-6-8-10-22)34-30(39)26(19-23-11-13-24(33)14-12-23)35-32(41)29(20(2)3)36-31(40)27-17-21(4)43-37-27/h6-17,20,25-26,29H,5,18-19H2,1-4H3,(H,34,39)(H,35,41)(H,36,40)/b16-15+/t25-,26+,29+/s2	MRDHFZJRJNYFNI-DVIJBLCFNA-N	11255	AG7088 analogue 4a::ethyl (2E,4S)-4-[(2S)-3-(4-fluorophenyl)-2-[(2S)-3-methyl-2-[(5-methyl-1,2-oxazol-3-yl)formamido]butanamido]propanamido]-5-phenylpent-2-enoate	3C-like proteinase (3CL-PRO)	Human SARS coronavirus		21000					7	25.00 C	Curated from the literature by BindingDB	10.1016/j.bmc.2005.05.065	15994085			Shie, JJ; Fang, JM; Kuo, TH; Kuo, CJ; Liang, PH; Huang, HJ; Wu, YT; Jan, JT; Cheng, YS; Wong, CH	National Taiwan University	http://www.bindingdb.org/bind/chemsearch/marvin/MolStructure.jsp?monomerid=11255	http://www.bindingdb.org/jsp/dbsearch/PrimarySearch_ki.jsp?energyterm=kJ/mole&tag=pol&polymerid=4753&target=3C-like+proteinase+%283CL-PRO%29&column=ki&startPg=0&Increment=50&submit=Search	http://www.bindingdb.org/jsp/dbsearch/PrimarySearch_ki.jsp?energyterm=kJ/mole&tag=r21&monomerid=11255&enzyme=3C-like+proteinase+%283CL-PRO%29&column=ki&startPg=0&Increment=50&submit=Search			15959298	46511803						ZINC14947912	1	MESLVLGVNEKTHVQLSLPVLQVRDVLVRGFGDSVEEALSEAREHLKNGTCGLVELEKGVLPQLEQPYVFIKRSDALSTNHGHKVVELVAEMDGIQYGRSGITLGVLVPHVGETPIAYRNVLLRKNGNKGAGGHSYGIDLKSYDLGDELGTDPIEDYEQNWNTKHGSGALRELTRELNGGAVTRYVDNNFCGPDGYPLDCIKDFLARAGKSMCTLSEQLDYIESKRGVYCCRDHEHEIAWFTERSDKSYEHQTPFEIKSAKKFDTFKGECPKFVFPLNSKVKVIQPRVEKKKTEGFMGRIRSVYPVASPQECNNMHLSTLMKCNHCDEVSWQTCDFLKATCEHCGTENLVIEGPTTCGYLPTNAVVKMPCPACQDPEIGPEHSVADYHNHSNIETRLRK…	1Q2W,1QZ8,1UJ1,1UK2,1UK3,1UK4,1UW7,1WOF,1Z1I,2A5A,2A5I,2A5K,2ACF,2AHM,2ALV,2AMD,2AMQ,2BX3,2BX4,2C3S,2D2D,2DUC,2FAV,2FE8,2FYG,2G9T,2GA6,2GDT,2GRI,2GT7,2GT8,2GTB,2GX4,2GZ7,2GZ8,2GZ9,2H2Z,2HOB,2HSX,2IDY,2JZF,2K7X,2K87,2KAF,2LIZ,2OP9,2OZK,2RNK,2V6N,2VJ1,2XYQ,2XYR,2XYV,2Z3C,2Z3D,2Z3E,2Z94,2Z9G,2Z9J,2Z9K,2Z9L,2ZU4,2ZU5,3D62,3E91,3E9S,3EA7,3EA8,3EBN,3IWM,3M3V,3MJ5,3R24,3SN8,3SNA,3SNB,3SNC,3SND,3SNE,3SZN…	Replicase polyprotein 1ab	R1AB_CVHSA	P0C6X7	P59641,Q6WGN0,Q7T697,Q808C0,Q80BV7,Q80BV8,Q80E51
19501	CCOC(=O)\C=C\[C@H](Cc1ccccc1)NC(=O)[C@H](Cc1ccc(F)cc1)NC(=O)[C@@H](NC(=O)OCc1ccccc1)C(C)C	InChI=1/C35H40FN3O6/c1-4-44-31(40)20-19-29(21-25-11-7-5-8-12-25)37-33(41)30(22-26-15-17-28(36)18-16-26)38-34(42)32(24(2)3)39-35(43)45-23-27-13-9-6-10-14-27/h5-20,24,29-30,32H,4,21-23H2,1-3H3,(H,37,41)(H,38,42)(H,39,43)/b20-19+/t29-,30+,32+/s2	VFODSYFBKHPECI-PUSOXUTLNA-N	11256	AG7088 analogue 4b::ethyl (2E,4S)-4-[(2S)-2-[(2S)-2-{[(benzyloxy)carbonyl]amino}-3-methylbutanamido]-3-(4-fluorophenyl)propanamido]-5-phenylpent-2-enoate	3C-like proteinase (3CL-PRO)	Human SARS coronavirus		11000					7	25.00 C	Curated from the literature by BindingDB	10.1016/j.bmc.2005.05.065	15994085			Shie, JJ; Fang, JM; Kuo, TH; Kuo, CJ; Liang, PH; Huang, HJ; Wu, YT; Jan, JT; Cheng, YS; Wong, CH	National Taiwan University	http://www.bindingdb.org/bind/chemsearch/marvin/MolStructure.jsp?monomerid=11256	http://www.bindingdb.org/jsp/dbsearch/PrimarySearch_ki.jsp?energyterm=kJ/mole&tag=pol&polymerid=4753&target=3C-like+proteinase+%283CL-PRO%29&column=ki&startPg=0&Increment=50&submit=Search	http://www.bindingdb.org/jsp/dbsearch/PrimarySearch_ki.jsp?energyterm=kJ/mole&tag=r21&monomerid=11256&enzyme=3C-like+proteinase+%283CL-PRO%29&column=ki&startPg=0&Increment=50&submit=Search			15959299	46511804						ZINC14947915	1	MESLVLGVNEKTHVQLSLPVLQVRDVLVRGFGDSVEEALSEAREHLKNGTCGLVELEKGVLPQLEQPYVFIKRSDALSTNHGHKVVELVAEMDGIQYGRSGITLGVLVPHVGETPIAYRNVLLRKNGNKGAGGHSYGIDLKSYDLGDELGTDPIEDYEQNWNTKHGSGALRELTRELNGGAVTRYVDNNFCGPDGYPLDCIKDFLARAGKSMCTLSEQLDYIESKRGVYCCRDHEHEIAWFTERSDKSYEHQTPFEIKSAKKFDTFKGECPKFVFPLNSKVKVIQPRVEKKKTEGFMGRIRSVYPVASPQECNNMHLSTLMKCNHCDEVSWQTCDFLKATCEHCGTENLVIEGPTTCGYLPTNAVVKMPCPACQDPEIGPEHSVADYHNHSNIETRLRK…	1Q2W,1QZ8,1UJ1,1UK2,1UK3,1UK4,1UW7,1WOF,1Z1I,2A5A,2A5I,2A5K,2ACF,2AHM,2ALV,2AMD,2AMQ,2BX3,2BX4,2C3S,2D2D,2DUC,2FAV,2FE8,2FYG,2G9T,2GA6,2GDT,2GRI,2GT7,2GT8,2GTB,2GX4,2GZ7,2GZ8,2GZ9,2H2Z,2HOB,2HSX,2IDY,2JZF,2K7X,2K87,2KAF,2LIZ,2OP9,2OZK,2RNK,2V6N,2VJ1,2XYQ,2XYR,2XYV,2Z3C,2Z3D,2Z3E,2Z94,2Z9G,2Z9J,2Z9K,2Z9L,2ZU4,2ZU5,3D62,3E91,3E9S,3EA7,3EA8,3EBN,3IWM,3M3V,3MJ5,3R24,3SN8,3SNA,3SNB,3SNC,3SND,3SNE,3SZN…	Replicase polyprotein 1ab	R1AB_CVHSA	P0C6X7	P59641,Q6WGN0,Q7T697,Q808C0,Q80BV7,Q80BV8,Q80E51
19502	CCOC(=O)\C=C\[C@H](Cc1ccccc1)NC(=O)[C@H](Cc1ccccc1)NC(=O)[C@@H](NC(=O)c1cc(C)on1)C(C)C	InChI=1/C32H38N4O6/c1-5-41-28(37)17-16-25(19-23-12-8-6-9-13-23)33-30(38)26(20-24-14-10-7-11-15-24)34-32(40)29(21(2)3)35-31(39)27-18-22(4)42-36-27/h6-18,21,25-26,29H,5,19-20H2,1-4H3,(H,33,38)(H,34,40)(H,35,39)/b17-16+/t25-,26+,29+/s2	DECFOJTYZGEZPC-NDRAYXEXNA-N	11257	AG7088 analogue 4c::ethyl (2E,4S)-4-[(2S)-2-[(2S)-3-methyl-2-[(5-methyl-1,2-oxazol-3-yl)formamido]butanamido]-3-phenylpropanamido]-5-phenylpent-2-enoate	3C-like proteinase (3CL-PRO)	Human SARS coronavirus		30000					7	25.00 C	Curated from the literature by BindingDB	10.1016/j.bmc.2005.05.065	15994085			Shie, JJ; Fang, JM; Kuo, TH; Kuo, CJ; Liang, PH; Huang, HJ; Wu, YT; Jan, JT; Cheng, YS; Wong, CH	National Taiwan University	http://www.bindingdb.org/bind/chemsearch/marvin/MolStructure.jsp?monomerid=11257	http://www.bindingdb.org/jsp/dbsearch/PrimarySearch_ki.jsp?energyterm=kJ/mole&tag=pol&polymerid=4753&target=3C-like+proteinase+%283CL-PRO%29&column=ki&startPg=0&Increment=50&submit=Search	http://www.bindingdb.org/jsp/dbsearch/PrimarySearch_ki.jsp?energyterm=kJ/mole&tag=r21&monomerid=11257&enzyme=3C-like+proteinase+%283CL-PRO%29&column=ki&startPg=0&Increment=50&submit=Search			15959300	46511805						ZINC14947918	1	MESLVLGVNEKTHVQLSLPVLQVRDVLVRGFGDSVEEALSEAREHLKNGTCGLVELEKGVLPQLEQPYVFIKRSDALSTNHGHKVVELVAEMDGIQYGRSGITLGVLVPHVGETPIAYRNVLLRKNGNKGAGGHSYGIDLKSYDLGDELGTDPIEDYEQNWNTKHGSGALRELTRELNGGAVTRYVDNNFCGPDGYPLDCIKDFLARAGKSMCTLSEQLDYIESKRGVYCCRDHEHEIAWFTERSDKSYEHQTPFEIKSAKKFDTFKGECPKFVFPLNSKVKVIQPRVEKKKTEGFMGRIRSVYPVASPQECNNMHLSTLMKCNHCDEVSWQTCDFLKATCEHCGTENLVIEGPTTCGYLPTNAVVKMPCPACQDPEIGPEHSVADYHNHSNIETRLRK…	1Q2W,1QZ8,1UJ1,1UK2,1UK3,1UK4,1UW7,1WOF,1Z1I,2A5A,2A5I,2A5K,2ACF,2AHM,2ALV,2AMD,2AMQ,2BX3,2BX4,2C3S,2D2D,2DUC,2FAV,2FE8,2FYG,2G9T,2GA6,2GDT,2GRI,2GT7,2GT8,2GTB,2GX4,2GZ7,2GZ8,2GZ9,2H2Z,2HOB,2HSX,2IDY,2JZF,2K7X,2K87,2KAF,2LIZ,2OP9,2OZK,2RNK,2V6N,2VJ1,2XYQ,2XYR,2XYV,2Z3C,2Z3D,2Z3E,2Z94,2Z9G,2Z9J,2Z9K,2Z9L,2ZU4,2ZU5,3D62,3E91,3E9S,3EA7,3EA8,3EBN,3IWM,3M3V,3MJ5,3R24,3SN8,3SNA,3SNB,3SNC,3SND,3SNE,3SZN…	Replicase polyprotein 1ab	R1AB_CVHSA	P0C6X7	P59641,Q6WGN0,Q7T697,Q808C0,Q80BV7,Q80BV8,Q80E51
19503	CCOC(=O)\C=C\[C@H](Cc1ccccc1)NC(=O)[C@H](Cc1ccccc1)NC(=O)[C@@H](NC(=O)OCc1ccccc1)C(C)C	InChI=1/C35H41N3O6/c1-4-43-31(39)21-20-29(22-26-14-8-5-9-15-26)36-33(40)30(23-27-16-10-6-11-17-27)37-34(41)32(25(2)3)38-35(42)44-24-28-18-12-7-13-19-28/h5-21,25,29-30,32H,4,22-24H2,1-3H3,(H,36,40)(H,37,41)(H,38,42)/b21-20+/t29-,30+,32+/s2	XGWDTJNPAMPMIY-QMXHOCIENA-N	11258	AG7088 analogue 4d::ethyl (2E,4S)-4-[(2S)-2-[(2S)-2-{[(benzyloxy)carbonyl]amino}-3-methylbutanamido]-3-phenylpropanamido]-5-phenylpent-2-enoate	3C-like proteinase (3CL-PRO)	Human SARS coronavirus		11000					7	25.00 C	Curated from the literature by BindingDB	10.1016/j.bmc.2005.05.065	15994085			Shie, JJ; Fang, JM; Kuo, TH; Kuo, CJ; Liang, PH; Huang, HJ; Wu, YT; Jan, JT; Cheng, YS; Wong, CH	National Taiwan University	http://www.bindingdb.org/bind/chemsearch/marvin/MolStructure.jsp?monomerid=11258	http://www.bindingdb.org/jsp/dbsearch/PrimarySearch_ki.jsp?energyterm=kJ/mole&tag=pol&polymerid=4753&target=3C-like+proteinase+%283CL-PRO%29&column=ki&startPg=0&Increment=50&submit=Search	http://www.bindingdb.org/jsp/dbsearch/PrimarySearch_ki.jsp?energyterm=kJ/mole&tag=r21&monomerid=11258&enzyme=3C-like+proteinase+%283CL-PRO%29&column=ki&startPg=0&Increment=50&submit=Search			15959301	46511806						ZINC14947921	1	MESLVLGVNEKTHVQLSLPVLQVRDVLVRGFGDSVEEALSEAREHLKNGTCGLVELEKGVLPQLEQPYVFIKRSDALSTNHGHKVVELVAEMDGIQYGRSGITLGVLVPHVGETPIAYRNVLLRKNGNKGAGGHSYGIDLKSYDLGDELGTDPIEDYEQNWNTKHGSGALRELTRELNGGAVTRYVDNNFCGPDGYPLDCIKDFLARAGKSMCTLSEQLDYIESKRGVYCCRDHEHEIAWFTERSDKSYEHQTPFEIKSAKKFDTFKGECPKFVFPLNSKVKVIQPRVEKKKTEGFMGRIRSVYPVASPQECNNMHLSTLMKCNHCDEVSWQTCDFLKATCEHCGTENLVIEGPTTCGYLPTNAVVKMPCPACQDPEIGPEHSVADYHNHSNIETRLRK…	1Q2W,1QZ8,1UJ1,1UK2,1UK3,1UK4,1UW7,1WOF,1Z1I,2A5A,2A5I,2A5K,2ACF,2AHM,2ALV,2AMD,2AMQ,2BX3,2BX4,2C3S,2D2D,2DUC,2FAV,2FE8,2FYG,2G9T,2GA6,2GDT,2GRI,2GT7,2GT8,2GTB,2GX4,2GZ7,2GZ8,2GZ9,2H2Z,2HOB,2HSX,2IDY,2JZF,2K7X,2K87,2KAF,2LIZ,2OP9,2OZK,2RNK,2V6N,2VJ1,2XYQ,2XYR,2XYV,2Z3C,2Z3D,2Z3E,2Z94,2Z9G,2Z9J,2Z9K,2Z9L,2ZU4,2ZU5,3D62,3E91,3E9S,3EA7,3EA8,3EBN,3IWM,3M3V,3MJ5,3R24,3SN8,3SNA,3SNB,3SNC,3SND,3SNE,3SZN…	Replicase polyprotein 1ab	R1AB_CVHSA	P0C6X7	P59641,Q6WGN0,Q7T697,Q808C0,Q80BV7,Q80BV8,Q80E51
19504	CCOC(=O)\C=C\[C@H](Cc1ccccc1)NC(=O)[C@H](Cc1ccccc1)NC(=O)\C=C\c1ccc(cc1)-c1ccccc1	InChI=1/C37H36N2O4/c1-2-43-36(41)25-23-33(26-29-12-6-3-7-13-29)38-37(42)34(27-30-14-8-4-9-15-30)39-35(40)24-20-28-18-21-32(22-19-28)31-16-10-5-11-17-31/h3-25,33-34H,2,26-27H2,1H3,(H,38,42)(H,39,40)/b24-20+,25-23+/t33-,34+/s2	PQFVYUJGFLSMKA-CMVMARRENA-N	11259	dipeptidomimetic unsaturated ester 18a::ethyl (2E,4S)-4-({N-[(2E)-3-(1,1-biphenyl-4-yl)prop-2-enoyl]-L-phenylalanyl}amino)-5-phenylpent-2-enoate::ethyl (2E,4S)-5-phenyl-4-[(2S)-3-phenyl-2-[(2E)-3-(4-phenylphenyl)prop-2-enamido]propanamido]pent-2-enoate	3C-like proteinase (3CL-PRO)	Human SARS coronavirus	6440	10000					7	25.00 C	Curated from the literature by BindingDB	10.1016/j.bmc.2005.05.065	15994085			Shie, JJ; Fang, JM; Kuo, TH; Kuo, CJ; Liang, PH; Huang, HJ; Wu, YT; Jan, JT; Cheng, YS; Wong, CH	National Taiwan University	http://www.bindingdb.org/bind/chemsearch/marvin/MolStructure.jsp?monomerid=11259	http://www.bindingdb.org/jsp/dbsearch/PrimarySearch_ki.jsp?energyterm=kJ/mole&tag=pol&polymerid=4753&target=3C-like+proteinase+%283CL-PRO%29&column=ki&startPg=0&Increment=50&submit=Search	http://www.bindingdb.org/jsp/dbsearch/PrimarySearch_ki.jsp?energyterm=kJ/mole&tag=r21&monomerid=11259&enzyme=3C-like+proteinase+%283CL-PRO%29&column=ki&startPg=0&Increment=50&submit=Search			15959302	46511807						ZINC14947924	1	MESLVLGVNEKTHVQLSLPVLQVRDVLVRGFGDSVEEALSEAREHLKNGTCGLVELEKGVLPQLEQPYVFIKRSDALSTNHGHKVVELVAEMDGIQYGRSGITLGVLVPHVGETPIAYRNVLLRKNGNKGAGGHSYGIDLKSYDLGDELGTDPIEDYEQNWNTKHGSGALRELTRELNGGAVTRYVDNNFCGPDGYPLDCIKDFLARAGKSMCTLSEQLDYIESKRGVYCCRDHEHEIAWFTERSDKSYEHQTPFEIKSAKKFDTFKGECPKFVFPLNSKVKVIQPRVEKKKTEGFMGRIRSVYPVASPQECNNMHLSTLMKCNHCDEVSWQTCDFLKATCEHCGTENLVIEGPTTCGYLPTNAVVKMPCPACQDPEIGPEHSVADYHNHSNIETRLRK…	1Q2W,1QZ8,1UJ1,1UK2,1UK3,1UK4,1UW7,1WOF,1Z1I,2A5A,2A5I,2A5K,2ACF,2AHM,2ALV,2AMD,2AMQ,2BX3,2BX4,2C3S,2D2D,2DUC,2FAV,2FE8,2FYG,2G9T,2GA6,2GDT,2GRI,2GT7,2GT8,2GTB,2GX4,2GZ7,2GZ8,2GZ9,2H2Z,2HOB,2HSX,2IDY,2JZF,2K7X,2K87,2KAF,2LIZ,2OP9,2OZK,2RNK,2V6N,2VJ1,2XYQ,2XYR,2XYV,2Z3C,2Z3D,2Z3E,2Z94,2Z9G,2Z9J,2Z9K,2Z9L,2ZU4,2ZU5,3D62,3E91,3E9S,3EA7,3EA8,3EBN,3IWM,3M3V,3MJ5,3R24,3SN8,3SNA,3SNB,3SNC,3SND,3SNE,3SZN…	Replicase polyprotein 1ab	R1AB_CVHSA	P0C6X7	P59641,Q6WGN0,Q7T697,Q808C0,Q80BV7,Q80BV8,Q80E51
19505	CCOC(=O)\C=C\[C@H](Cc1ccccc1)NC(=O)[C@H](Cc1ccccc1)NC(=O)\C=C\c1ccc(cc1)N(=O)=O	InChI=1/C31H31N3O6/c1-2-40-30(36)20-16-26(21-24-9-5-3-6-10-24)32-31(37)28(22-25-11-7-4-8-12-25)33-29(35)19-15-23-13-17-27(18-14-23)34(38)39/h3-20,26,28H,2,21-22H2,1H3,(H,32,37)(H,33,35)/b19-15+,20-16+/t26-,28+/s2	XAYRYKDJTCRRDA-BAQSCXIMNA-N	11260	dipeptidomimetic unsaturated ester 18b::ethyl (2E,4S)-4-({N-[(2E)-3-(4-nitrophenyl)prop-2-enoyl]-L-phenylalanyl}amino)-5-phenylpent-2-enoate::ethyl (2E,4S)-4-[(2S)-2-[(2E)-3-(4-nitrophenyl)prop-2-enamido]-3-phenylpropanamido]-5-phenylpent-2-enoate	3C-like proteinase (3CL-PRO)	Human SARS coronavirus	2480	5000					7	25.00 C	Curated from the literature by BindingDB	10.1016/j.bmc.2005.05.065	15994085			Shie, JJ; Fang, JM; Kuo, TH; Kuo, CJ; Liang, PH; Huang, HJ; Wu, YT; Jan, JT; Cheng, YS; Wong, CH	National Taiwan University	http://www.bindingdb.org/bind/chemsearch/marvin/MolStructure.jsp?monomerid=11260	http://www.bindingdb.org/jsp/dbsearch/PrimarySearch_ki.jsp?energyterm=kJ/mole&tag=pol&polymerid=4753&target=3C-like+proteinase+%283CL-PRO%29&column=ki&startPg=0&Increment=50&submit=Search	http://www.bindingdb.org/jsp/dbsearch/PrimarySearch_ki.jsp?energyterm=kJ/mole&tag=r21&monomerid=11260&enzyme=3C-like+proteinase+%283CL-PRO%29&column=ki&startPg=0&Increment=50&submit=Search			15959303	46511808					C06058	ZINC14947927	1	MESLVLGVNEKTHVQLSLPVLQVRDVLVRGFGDSVEEALSEAREHLKNGTCGLVELEKGVLPQLEQPYVFIKRSDALSTNHGHKVVELVAEMDGIQYGRSGITLGVLVPHVGETPIAYRNVLLRKNGNKGAGGHSYGIDLKSYDLGDELGTDPIEDYEQNWNTKHGSGALRELTRELNGGAVTRYVDNNFCGPDGYPLDCIKDFLARAGKSMCTLSEQLDYIESKRGVYCCRDHEHEIAWFTERSDKSYEHQTPFEIKSAKKFDTFKGECPKFVFPLNSKVKVIQPRVEKKKTEGFMGRIRSVYPVASPQECNNMHLSTLMKCNHCDEVSWQTCDFLKATCEHCGTENLVIEGPTTCGYLPTNAVVKMPCPACQDPEIGPEHSVADYHNHSNIETRLRK…	1Q2W,1QZ8,1UJ1,1UK2,1UK3,1UK4,1UW7,1WOF,1Z1I,2A5A,2A5I,2A5K,2ACF,2AHM,2ALV,2AMD,2AMQ,2BX3,2BX4,2C3S,2D2D,2DUC,2FAV,2FE8,2FYG,2G9T,2GA6,2GDT,2GRI,2GT7,2GT8,2GTB,2GX4,2GZ7,2GZ8,2GZ9,2H2Z,2HOB,2HSX,2IDY,2JZF,2K7X,2K87,2KAF,2LIZ,2OP9,2OZK,2RNK,2V6N,2VJ1,2XYQ,2XYR,2XYV,2Z3C,2Z3D,2Z3E,2Z94,2Z9G,2Z9J,2Z9K,2Z9L,2ZU4,2ZU5,3D62,3E91,3E9S,3EA7,3EA8,3EBN,3IWM,3M3V,3MJ5,3R24,3SN8,3SNA,3SNB,3SNC,3SND,3SNE,3SZN…	Replicase polyprotein 1ab	R1AB_CVHSA	P0C6X7	P59641,Q6WGN0,Q7T697,Q808C0,Q80BV7,Q80BV8,Q80E51
19506	CCOC(=O)\C=C\[C@H](Cc1ccccc1)NC(=O)[C@H](Cc1ccccc1)NC(=O)\C=C\c1ccc(cc1)N(C)C	InChI=1/C33H37N3O4/c1-4-40-32(38)22-18-28(23-26-11-7-5-8-12-26)34-33(39)30(24-27-13-9-6-10-14-27)35-31(37)21-17-25-15-19-29(20-16-25)36(2)3/h5-22,28,30H,4,23-24H2,1-3H3,(H,34,39)(H,35,37)/b21-17+,22-18+/t28-,30+/s2	JWPLKCWYGMPRGX-XWAXLTSUNA-N	11261	dipeptidomimetic unsaturated ester 18c::ethyl (2E,4S)-4-[(2S)-2-[(2E)-3-[4-(dimethylamino)phenyl]prop-2-enamido]-3-phenylpropanamido]-5-phenylpent-2-enoate::ethyl (2E,4S)-4-[(N-{(2E)-3-[4-(dimethylamino)phenyl]prop-2-enoyl}-L-phenylalanyl)amino]-5-phenylpent-2-enoate	3C-like proteinase (3CL-PRO)	Human SARS coronavirus	520	1000					7	25.00 C	Curated from the literature by BindingDB	10.1016/j.bmc.2005.05.065	15994085			Shie, JJ; Fang, JM; Kuo, TH; Kuo, CJ; Liang, PH; Huang, HJ; Wu, YT; Jan, JT; Cheng, YS; Wong, CH	National Taiwan University	http://www.bindingdb.org/bind/chemsearch/marvin/MolStructure.jsp?monomerid=11261	http://www.bindingdb.org/jsp/dbsearch/PrimarySearch_ki.jsp?energyterm=kJ/mole&tag=pol&polymerid=4753&target=3C-like+proteinase+%283CL-PRO%29&column=ki&startPg=0&Increment=50&submit=Search	http://www.bindingdb.org/jsp/dbsearch/PrimarySearch_ki.jsp?energyterm=kJ/mole&tag=r21&monomerid=11261&enzyme=3C-like+proteinase+%283CL-PRO%29&column=ki&startPg=0&Increment=50&submit=Search			11555658	46511809						ZINC14947930	1	MESLVLGVNEKTHVQLSLPVLQVRDVLVRGFGDSVEEALSEAREHLKNGTCGLVELEKGVLPQLEQPYVFIKRSDALSTNHGHKVVELVAEMDGIQYGRSGITLGVLVPHVGETPIAYRNVLLRKNGNKGAGGHSYGIDLKSYDLGDELGTDPIEDYEQNWNTKHGSGALRELTRELNGGAVTRYVDNNFCGPDGYPLDCIKDFLARAGKSMCTLSEQLDYIESKRGVYCCRDHEHEIAWFTERSDKSYEHQTPFEIKSAKKFDTFKGECPKFVFPLNSKVKVIQPRVEKKKTEGFMGRIRSVYPVASPQECNNMHLSTLMKCNHCDEVSWQTCDFLKATCEHCGTENLVIEGPTTCGYLPTNAVVKMPCPACQDPEIGPEHSVADYHNHSNIETRLRK…	1Q2W,1QZ8,1UJ1,1UK2,1UK3,1UK4,1UW7,1WOF,1Z1I,2A5A,2A5I,2A5K,2ACF,2AHM,2ALV,2AMD,2AMQ,2BX3,2BX4,2C3S,2D2D,2DUC,2FAV,2FE8,2FYG,2G9T,2GA6,2GDT,2GRI,2GT7,2GT8,2GTB,2GX4,2GZ7,2GZ8,2GZ9,2H2Z,2HOB,2HSX,2IDY,2JZF,2K7X,2K87,2KAF,2LIZ,2OP9,2OZK,2RNK,2V6N,2VJ1,2XYQ,2XYR,2XYV,2Z3C,2Z3D,2Z3E,2Z94,2Z9G,2Z9J,2Z9K,2Z9L,2ZU4,2ZU5,3D62,3E91,3E9S,3EA7,3EA8,3EBN,3IWM,3M3V,3MJ5,3R24,3SN8,3SNA,3SNB,3SNC,3SND,3SNE,3SZN…	Replicase polyprotein 1ab	R1AB_CVHSA	P0C6X7	P59641,Q6WGN0,Q7T697,Q808C0,Q80BV7,Q80BV8,Q80E51
19507	CCOC(=O)\C=C\[C@H](Cc1ccccc1)NC(=O)[C@H](Cc1ccccc1)NC(=O)\C=C\c1ccc(OC)cc1OC	InChI=1/C33H36N2O6/c1-4-41-32(37)20-17-27(21-24-11-7-5-8-12-24)34-33(38)29(22-25-13-9-6-10-14-25)35-31(36)19-16-26-15-18-28(39-2)23-30(26)40-3/h5-20,23,27,29H,4,21-22H2,1-3H3,(H,34,38)(H,35,36)/b19-16+,20-17+/t27-,29+/s2	ACACSUQRMWRCPB-YFTDNRGTNA-N	11262	dipeptidomimetic unsaturated ester 18d::ethyl (2E,4S)-4-({N-[(2E)-3-(2,4-dimethoxyphenyl)prop-2-enoyl]-L-phenylalanyl}amino)-5-phenylpent-2-enoate::ethyl (2E,4S)-4-[(2S)-2-[(2E)-3-(2,4-dimethoxyphenyl)prop-2-enamido]-3-phenylpropanamido]-5-phenylpent-2-enoate	3C-like proteinase (3CL-PRO)	Human SARS coronavirus	9049	10000					7	25.00 C	Curated from the literature by BindingDB	10.1016/j.bmc.2005.05.065	15994085			Shie, JJ; Fang, JM; Kuo, TH; Kuo, CJ; Liang, PH; Huang, HJ; Wu, YT; Jan, JT; Cheng, YS; Wong, CH	National Taiwan University	http://www.bindingdb.org/bind/chemsearch/marvin/MolStructure.jsp?monomerid=11262	http://www.bindingdb.org/jsp/dbsearch/PrimarySearch_ki.jsp?energyterm=kJ/mole&tag=pol&polymerid=4753&target=3C-like+proteinase+%283CL-PRO%29&column=ki&startPg=0&Increment=50&submit=Search	http://www.bindingdb.org/jsp/dbsearch/PrimarySearch_ki.jsp?energyterm=kJ/mole&tag=r21&monomerid=11262&enzyme=3C-like+proteinase+%283CL-PRO%29&column=ki&startPg=0&Increment=50&submit=Search			15959304	46511810						ZINC14947933	1	MESLVLGVNEKTHVQLSLPVLQVRDVLVRGFGDSVEEALSEAREHLKNGTCGLVELEKGVLPQLEQPYVFIKRSDALSTNHGHKVVELVAEMDGIQYGRSGITLGVLVPHVGETPIAYRNVLLRKNGNKGAGGHSYGIDLKSYDLGDELGTDPIEDYEQNWNTKHGSGALRELTRELNGGAVTRYVDNNFCGPDGYPLDCIKDFLARAGKSMCTLSEQLDYIESKRGVYCCRDHEHEIAWFTERSDKSYEHQTPFEIKSAKKFDTFKGECPKFVFPLNSKVKVIQPRVEKKKTEGFMGRIRSVYPVASPQECNNMHLSTLMKCNHCDEVSWQTCDFLKATCEHCGTENLVIEGPTTCGYLPTNAVVKMPCPACQDPEIGPEHSVADYHNHSNIETRLRK…	1Q2W,1QZ8,1UJ1,1UK2,1UK3,1UK4,1UW7,1WOF,1Z1I,2A5A,2A5I,2A5K,2ACF,2AHM,2ALV,2AMD,2AMQ,2BX3,2BX4,2C3S,2D2D,2DUC,2FAV,2FE8,2FYG,2G9T,2GA6,2GDT,2GRI,2GT7,2GT8,2GTB,2GX4,2GZ7,2GZ8,2GZ9,2H2Z,2HOB,2HSX,2IDY,2JZF,2K7X,2K87,2KAF,2LIZ,2OP9,2OZK,2RNK,2V6N,2VJ1,2XYQ,2XYR,2XYV,2Z3C,2Z3D,2Z3E,2Z94,2Z9G,2Z9J,2Z9K,2Z9L,2ZU4,2ZU5,3D62,3E91,3E9S,3EA7,3EA8,3EBN,3IWM,3M3V,3MJ5,3R24,3SN8,3SNA,3SNB,3SNC,3SND,3SNE,3SZN…	Replicase polyprotein 1ab	R1AB_CVHSA	P0C6X7	P59641,Q6WGN0,Q7T697,Q808C0,Q80BV7,Q80BV8,Q80E51
19508	CCOC(=O)\C=C\[C@H](Cc1ccccc1)NC(=O)[C@H](Cc1ccccc1)NC(=O)\C=C\c1ccc2OCOc2c1	InChI=1/C32H32N2O6/c1-2-38-31(36)18-15-26(19-23-9-5-3-6-10-23)33-32(37)27(20-24-11-7-4-8-12-24)34-30(35)17-14-25-13-16-28-29(21-25)40-22-39-28/h3-18,21,26-27H,2,19-20,22H2,1H3,(H,33,37)(H,34,35)/b17-14+,18-15+/t26-,27+/s2	PQLARAJPSQMPIR-LBHWMSKXNA-N	11263	dipeptidomimetic unsaturated ester 18e::ethyl (2E,4S)-4-({N-[(2E)-3-(1,3-benzodioxol-5-yl)prop-2-enoyl]-L-phenylalanyl}amino)-5-phenylpent-2-enoate::ethyl (2E,4S)-4-[(2S)-2-[(2E)-3-(2H-1,3-benzodioxol-5-yl)prop-2-enamido]-3-phenylpropanamido]-5-phenylpent-2-enoate	3C-like proteinase (3CL-PRO)	Human SARS coronavirus	3046	7000					7	25.00 C	Curated from the literature by BindingDB	10.1016/j.bmc.2005.05.065	15994085			Shie, JJ; Fang, JM; Kuo, TH; Kuo, CJ; Liang, PH; Huang, HJ; Wu, YT; Jan, JT; Cheng, YS; Wong, CH	National Taiwan University	http://www.bindingdb.org/bind/chemsearch/marvin/MolStructure.jsp?monomerid=11263	http://www.bindingdb.org/jsp/dbsearch/PrimarySearch_ki.jsp?energyterm=kJ/mole&tag=pol&polymerid=4753&target=3C-like+proteinase+%283CL-PRO%29&column=ki&startPg=0&Increment=50&submit=Search	http://www.bindingdb.org/jsp/dbsearch/PrimarySearch_ki.jsp?energyterm=kJ/mole&tag=r21&monomerid=11263&enzyme=3C-like+proteinase+%283CL-PRO%29&column=ki&startPg=0&Increment=50&submit=Search			23645527	46511811						ZINC14947936	1	MESLVLGVNEKTHVQLSLPVLQVRDVLVRGFGDSVEEALSEAREHLKNGTCGLVELEKGVLPQLEQPYVFIKRSDALSTNHGHKVVELVAEMDGIQYGRSGITLGVLVPHVGETPIAYRNVLLRKNGNKGAGGHSYGIDLKSYDLGDELGTDPIEDYEQNWNTKHGSGALRELTRELNGGAVTRYVDNNFCGPDGYPLDCIKDFLARAGKSMCTLSEQLDYIESKRGVYCCRDHEHEIAWFTERSDKSYEHQTPFEIKSAKKFDTFKGECPKFVFPLNSKVKVIQPRVEKKKTEGFMGRIRSVYPVASPQECNNMHLSTLMKCNHCDEVSWQTCDFLKATCEHCGTENLVIEGPTTCGYLPTNAVVKMPCPACQDPEIGPEHSVADYHNHSNIETRLRK…	1Q2W,1QZ8,1UJ1,1UK2,1UK3,1UK4,1UW7,1WOF,1Z1I,2A5A,2A5I,2A5K,2ACF,2AHM,2ALV,2AMD,2AMQ,2BX3,2BX4,2C3S,2D2D,2DUC,2FAV,2FE8,2FYG,2G9T,2GA6,2GDT,2GRI,2GT7,2GT8,2GTB,2GX4,2GZ7,2GZ8,2GZ9,2H2Z,2HOB,2HSX,2IDY,2JZF,2K7X,2K87,2KAF,2LIZ,2OP9,2OZK,2RNK,2V6N,2VJ1,2XYQ,2XYR,2XYV,2Z3C,2Z3D,2Z3E,2Z94,2Z9G,2Z9J,2Z9K,2Z9L,2ZU4,2ZU5,3D62,3E91,3E9S,3EA7,3EA8,3EBN,3IWM,3M3V,3MJ5,3R24,3SN8,3SNA,3SNB,3SNC,3SND,3SNE,3SZN…	Replicase polyprotein 1ab	R1AB_CVHSA	P0C6X7	P59641,Q6WGN0,Q7T697,Q808C0,Q80BV7,Q80BV8,Q80E51
19509	Clc1cc(Cl)cc(NC(=O)CSc2nccc(n2)-c2csc(n2)-c2ccccc2)c1	InChI=1S/C21H14Cl2N4OS2/c22-14-8-15(23)10-16(9-14)25-19(28)12-30-21-24-7-6-17(27-21)18-11-29-20(26-18)13-4-2-1-3-5-13/h1-11H,12H2,(H,25,28)	LILOEJREEQFTPM-UHFFFAOYSA-N	11264	N-(3,5-dichlorophenyl)-2-{[4-(2-phenyl-1,3-thiazol-4-yl)pyrimidin-2-yl]sulfanyl}acetamide::pyrimidine-containing compound 1	3C-like proteinase (3CL-PRO)	Human SARS coronavirus		3000					7	25.00 C	Curated from the literature by BindingDB	10.1021/jm050852f	16759091			Tsai, KC; Chen, SY; Liang, PH; Lu, IL; Mahindroo, N; Hsieh, HP; Chao, YS; Liu, L; Liu, D; Lien, W; Lin, TH; Wu, SY	National Tsing Hua University	http://www.bindingdb.org/bind/chemsearch/marvin/MolStructure.jsp?monomerid=11264	http://www.bindingdb.org/jsp/dbsearch/PrimarySearch_ki.jsp?energyterm=kJ/mole&tag=pol&polymerid=4753&target=3C-like+proteinase+%283CL-PRO%29&column=ki&startPg=0&Increment=50&submit=Search	http://www.bindingdb.org/jsp/dbsearch/PrimarySearch_ki.jsp?energyterm=kJ/mole&tag=r21&monomerid=11264&enzyme=3C-like+proteinase+%283CL-PRO%29&column=ki&startPg=0&Increment=50&submit=Search			2744814	46511812						ZINC01047806	1	MESLVLGVNEKTHVQLSLPVLQVRDVLVRGFGDSVEEALSEAREHLKNGTCGLVELEKGVLPQLEQPYVFIKRSDALSTNHGHKVVELVAEMDGIQYGRSGITLGVLVPHVGETPIAYRNVLLRKNGNKGAGGHSYGIDLKSYDLGDELGTDPIEDYEQNWNTKHGSGALRELTRELNGGAVTRYVDNNFCGPDGYPLDCIKDFLARAGKSMCTLSEQLDYIESKRGVYCCRDHEHEIAWFTERSDKSYEHQTPFEIKSAKKFDTFKGECPKFVFPLNSKVKVIQPRVEKKKTEGFMGRIRSVYPVASPQECNNMHLSTLMKCNHCDEVSWQTCDFLKATCEHCGTENLVIEGPTTCGYLPTNAVVKMPCPACQDPEIGPEHSVADYHNHSNIETRLRK…	1Q2W,1QZ8,1UJ1,1UK2,1UK3,1UK4,1UW7,1WOF,1Z1I,2A5A,2A5I,2A5K,2ACF,2AHM,2ALV,2AMD,2AMQ,2BX3,2BX4,2C3S,2D2D,2DUC,2FAV,2FE8,2FYG,2G9T,2GA6,2GDT,2GRI,2GT7,2GT8,2GTB,2GX4,2GZ7,2GZ8,2GZ9,2H2Z,2HOB,2HSX,2IDY,2JZF,2K7X,2K87,2KAF,2LIZ,2OP9,2OZK,2RNK,2V6N,2VJ1,2XYQ,2XYR,2XYV,2Z3C,2Z3D,2Z3E,2Z94,2Z9G,2Z9J,2Z9K,2Z9L,2ZU4,2ZU5,3D62,3E91,3E9S,3EA7,3EA8,3EBN,3IWM,3M3V,3MJ5,3R24,3SN8,3SNA,3SNB,3SNC,3SND,3SNE,3SZN…	Replicase polyprotein 1ab	R1AB_CVHSA	P0C6X7	P59641,Q6WGN0,Q7T697,Q808C0,Q80BV7,Q80BV8,Q80E51
19510	Cn1nc(cc1C(F)(F)F)-c1ccc(s1)-c1ccnc(SCC(=O)Nc2ccc(Cl)cc2)n1	InChI=1S/C21H15ClF3N5OS2/c1-30-18(21(23,24)25)10-15(29-30)17-7-6-16(33-17)14-8-9-26-20(28-14)32-11-19(31)27-13-4-2-12(22)3-5-13/h2-10H,11H2,1H3,(H,27,31)	AWQBIBTZJKFLEW-UHFFFAOYSA-N	11265	N-(4-chlorophenyl)-2-[(4-{5-[1-methyl-5-(trifluoromethyl)-1H-pyrazol-3-yl]thiophen-2-yl}pyrimidin-2-yl)sulfanyl]acetamide::pyrimidine-containing compound 2	3C-like proteinase (3CL-PRO)	Human SARS coronavirus		10000					7	25.00 C	Curated from the literature by BindingDB	10.1021/jm050852f	16759091			Tsai, KC; Chen, SY; Liang, PH; Lu, IL; Mahindroo, N; Hsieh, HP; Chao, YS; Liu, L; Liu, D; Lien, W; Lin, TH; Wu, SY	National Tsing Hua University	http://www.bindingdb.org/bind/chemsearch/marvin/MolStructure.jsp?monomerid=11265	http://www.bindingdb.org/jsp/dbsearch/PrimarySearch_ki.jsp?energyterm=kJ/mole&tag=pol&polymerid=4753&target=3C-like+proteinase+%283CL-PRO%29&column=ki&startPg=0&Increment=50&submit=Search	http://www.bindingdb.org/jsp/dbsearch/PrimarySearch_ki.jsp?energyterm=kJ/mole&tag=r21&monomerid=11265&enzyme=3C-like+proteinase+%283CL-PRO%29&column=ki&startPg=0&Increment=50&submit=Search			2821293	46511813						ZINC01038692	1	MESLVLGVNEKTHVQLSLPVLQVRDVLVRGFGDSVEEALSEAREHLKNGTCGLVELEKGVLPQLEQPYVFIKRSDALSTNHGHKVVELVAEMDGIQYGRSGITLGVLVPHVGETPIAYRNVLLRKNGNKGAGGHSYGIDLKSYDLGDELGTDPIEDYEQNWNTKHGSGALRELTRELNGGAVTRYVDNNFCGPDGYPLDCIKDFLARAGKSMCTLSEQLDYIESKRGVYCCRDHEHEIAWFTERSDKSYEHQTPFEIKSAKKFDTFKGECPKFVFPLNSKVKVIQPRVEKKKTEGFMGRIRSVYPVASPQECNNMHLSTLMKCNHCDEVSWQTCDFLKATCEHCGTENLVIEGPTTCGYLPTNAVVKMPCPACQDPEIGPEHSVADYHNHSNIETRLRK…	1Q2W,1QZ8,1UJ1,1UK2,1UK3,1UK4,1UW7,1WOF,1Z1I,2A5A,2A5I,2A5K,2ACF,2AHM,2ALV,2AMD,2AMQ,2BX3,2BX4,2C3S,2D2D,2DUC,2FAV,2FE8,2FYG,2G9T,2GA6,2GDT,2GRI,2GT7,2GT8,2GTB,2GX4,2GZ7,2GZ8,2GZ9,2H2Z,2HOB,2HSX,2IDY,2JZF,2K7X,2K87,2KAF,2LIZ,2OP9,2OZK,2RNK,2V6N,2VJ1,2XYQ,2XYR,2XYV,2Z3C,2Z3D,2Z3E,2Z94,2Z9G,2Z9J,2Z9K,2Z9L,2ZU4,2ZU5,3D62,3E91,3E9S,3EA7,3EA8,3EBN,3IWM,3M3V,3MJ5,3R24,3SN8,3SNA,3SNB,3SNC,3SND,3SNE,3SZN…	Replicase polyprotein 1ab	R1AB_CVHSA	P0C6X7	P59641,Q6WGN0,Q7T697,Q808C0,Q80BV7,Q80BV8,Q80E51
19511	CSc1sc(c(C)c1-c1ccnc(SCC(=O)Nc2ccc(Cl)cc2)n1)-c1nc(C)cs1	InChI=1S/C22H19ClN4OS4/c1-12-10-30-20(25-12)19-13(2)18(21(29-3)32-19)16-8-9-24-22(27-16)31-11-17(28)26-15-6-4-14(23)5-7-15/h4-10H,11H2,1-3H3,(H,26,28)	WRXXISITJDZVCL-UHFFFAOYSA-N	11266	N-(4-chlorophenyl)-2-({4-[4-methyl-5-(4-methyl-1,3-thiazol-2-yl)-2-(methylsulfanyl)thiophen-3-yl]pyrimidin-2-yl}sulfanyl)acetamide::pyrimidine-containing compound 3	3C-like proteinase (3CL-PRO)	Human SARS coronavirus		11000					7	25.00 C	Curated from the literature by BindingDB	10.1021/jm050852f	16759091			Tsai, KC; Chen, SY; Liang, PH; Lu, IL; Mahindroo, N; Hsieh, HP; Chao, YS; Liu, L; Liu, D; Lien, W; Lin, TH; Wu, SY	National Tsing Hua University	http://www.bindingdb.org/bind/chemsearch/marvin/MolStructure.jsp?monomerid=11266	http://www.bindingdb.org/jsp/dbsearch/PrimarySearch_ki.jsp?energyterm=kJ/mole&tag=pol&polymerid=4753&target=3C-like+proteinase+%283CL-PRO%29&column=ki&startPg=0&Increment=50&submit=Search	http://www.bindingdb.org/jsp/dbsearch/PrimarySearch_ki.jsp?energyterm=kJ/mole&tag=r21&monomerid=11266&enzyme=3C-like+proteinase+%283CL-PRO%29&column=ki&startPg=0&Increment=50&submit=Search			2820912	46511814						ZINC02142079	1	MESLVLGVNEKTHVQLSLPVLQVRDVLVRGFGDSVEEALSEAREHLKNGTCGLVELEKGVLPQLEQPYVFIKRSDALSTNHGHKVVELVAEMDGIQYGRSGITLGVLVPHVGETPIAYRNVLLRKNGNKGAGGHSYGIDLKSYDLGDELGTDPIEDYEQNWNTKHGSGALRELTRELNGGAVTRYVDNNFCGPDGYPLDCIKDFLARAGKSMCTLSEQLDYIESKRGVYCCRDHEHEIAWFTERSDKSYEHQTPFEIKSAKKFDTFKGECPKFVFPLNSKVKVIQPRVEKKKTEGFMGRIRSVYPVASPQECNNMHLSTLMKCNHCDEVSWQTCDFLKATCEHCGTENLVIEGPTTCGYLPTNAVVKMPCPACQDPEIGPEHSVADYHNHSNIETRLRK…	1Q2W,1QZ8,1UJ1,1UK2,1UK3,1UK4,1UW7,1WOF,1Z1I,2A5A,2A5I,2A5K,2ACF,2AHM,2ALV,2AMD,2AMQ,2BX3,2BX4,2C3S,2D2D,2DUC,2FAV,2FE8,2FYG,2G9T,2GA6,2GDT,2GRI,2GT7,2GT8,2GTB,2GX4,2GZ7,2GZ8,2GZ9,2H2Z,2HOB,2HSX,2IDY,2JZF,2K7X,2K87,2KAF,2LIZ,2OP9,2OZK,2RNK,2V6N,2VJ1,2XYQ,2XYR,2XYV,2Z3C,2Z3D,2Z3E,2Z94,2Z9G,2Z9J,2Z9K,2Z9L,2ZU4,2ZU5,3D62,3E91,3E9S,3EA7,3EA8,3EBN,3IWM,3M3V,3MJ5,3R24,3SN8,3SNA,3SNB,3SNC,3SND,3SNE,3SZN…	Replicase polyprotein 1ab	R1AB_CVHSA	P0C6X7	P59641,Q6WGN0,Q7T697,Q808C0,Q80BV7,Q80BV8,Q80E51
19512	CSc1sc(c(C)c1-c1ccnc(SCC(=O)Nc2ccccc2Cl)n1)-c1nc(C)cs1	InChI=1S/C22H19ClN4OS4/c1-12-10-30-20(25-12)19-13(2)18(21(29-3)32-19)16-8-9-24-22(27-16)31-11-17(28)26-15-7-5-4-6-14(15)23/h4-10H,11H2,1-3H3,(H,26,28)	NNVVKOVHRSDRSQ-UHFFFAOYSA-N	11267	N-(2-chlorophenyl)-2-({4-[4-methyl-5-(4-methyl-1,3-thiazol-2-yl)-2-(methylsulfanyl)thiophen-3-yl]pyrimidin-2-yl}sulfanyl)acetamide::pyrimidine-containing compound 4	3C-like proteinase (3CL-PRO)	Human SARS coronavirus		12000					7	25.00 C	Curated from the literature by BindingDB	10.1021/jm050852f	16759091			Tsai, KC; Chen, SY; Liang, PH; Lu, IL; Mahindroo, N; Hsieh, HP; Chao, YS; Liu, L; Liu, D; Lien, W; Lin, TH; Wu, SY	National Tsing Hua University	http://www.bindingdb.org/bind/chemsearch/marvin/MolStructure.jsp?monomerid=11267	http://www.bindingdb.org/jsp/dbsearch/PrimarySearch_ki.jsp?energyterm=kJ/mole&tag=pol&polymerid=4753&target=3C-like+proteinase+%283CL-PRO%29&column=ki&startPg=0&Increment=50&submit=Search	http://www.bindingdb.org/jsp/dbsearch/PrimarySearch_ki.jsp?energyterm=kJ/mole&tag=r21&monomerid=11267&enzyme=3C-like+proteinase+%283CL-PRO%29&column=ki&startPg=0&Increment=50&submit=Search			2820914	46511815						ZINC02141912	1	MESLVLGVNEKTHVQLSLPVLQVRDVLVRGFGDSVEEALSEAREHLKNGTCGLVELEKGVLPQLEQPYVFIKRSDALSTNHGHKVVELVAEMDGIQYGRSGITLGVLVPHVGETPIAYRNVLLRKNGNKGAGGHSYGIDLKSYDLGDELGTDPIEDYEQNWNTKHGSGALRELTRELNGGAVTRYVDNNFCGPDGYPLDCIKDFLARAGKSMCTLSEQLDYIESKRGVYCCRDHEHEIAWFTERSDKSYEHQTPFEIKSAKKFDTFKGECPKFVFPLNSKVKVIQPRVEKKKTEGFMGRIRSVYPVASPQECNNMHLSTLMKCNHCDEVSWQTCDFLKATCEHCGTENLVIEGPTTCGYLPTNAVVKMPCPACQDPEIGPEHSVADYHNHSNIETRLRK…	1Q2W,1QZ8,1UJ1,1UK2,1UK3,1UK4,1UW7,1WOF,1Z1I,2A5A,2A5I,2A5K,2ACF,2AHM,2ALV,2AMD,2AMQ,2BX3,2BX4,2C3S,2D2D,2DUC,2FAV,2FE8,2FYG,2G9T,2GA6,2GDT,2GRI,2GT7,2GT8,2GTB,2GX4,2GZ7,2GZ8,2GZ9,2H2Z,2HOB,2HSX,2IDY,2JZF,2K7X,2K87,2KAF,2LIZ,2OP9,2OZK,2RNK,2V6N,2VJ1,2XYQ,2XYR,2XYV,2Z3C,2Z3D,2Z3E,2Z94,2Z9G,2Z9J,2Z9K,2Z9L,2ZU4,2ZU5,3D62,3E91,3E9S,3EA7,3EA8,3EBN,3IWM,3M3V,3MJ5,3R24,3SN8,3SNA,3SNB,3SNC,3SND,3SNE,3SZN…	Replicase polyprotein 1ab	R1AB_CVHSA	P0C6X7	P59641,Q6WGN0,Q7T697,Q808C0,Q80BV7,Q80BV8,Q80E51
19513	Cc1nc(cs1)-c1nc(cs1)-c1ccnc(SCC(=O)Nc2ccc(Cl)cc2)n1	InChI=1S/C19H14ClN5OS3/c1-11-22-16(9-27-11)18-24-15(8-28-18)14-6-7-21-19(25-14)29-10-17(26)23-13-4-2-12(20)3-5-13/h2-9H,10H2,1H3,(H,23,26)	JEZYTEDGOJCVQS-UHFFFAOYSA-N	11268	N-(4-chlorophenyl)-2-({4-[2-(2-methyl-1,3-thiazol-4-yl)-1,3-thiazol-4-yl]pyrimidin-2-yl}sulfanyl)acetamide::pyrimidine-containing compound 5	3C-like proteinase (3CL-PRO)	Human SARS coronavirus		14000					7	25.00 C	Curated from the literature by BindingDB	10.1021/jm050852f	16759091			Tsai, KC; Chen, SY; Liang, PH; Lu, IL; Mahindroo, N; Hsieh, HP; Chao, YS; Liu, L; Liu, D; Lien, W; Lin, TH; Wu, SY	National Tsing Hua University	http://www.bindingdb.org/bind/chemsearch/marvin/MolStructure.jsp?monomerid=11268	http://www.bindingdb.org/jsp/dbsearch/PrimarySearch_ki.jsp?energyterm=kJ/mole&tag=pol&polymerid=4753&target=3C-like+proteinase+%283CL-PRO%29&column=ki&startPg=0&Increment=50&submit=Search	http://www.bindingdb.org/jsp/dbsearch/PrimarySearch_ki.jsp?energyterm=kJ/mole&tag=r21&monomerid=11268&enzyme=3C-like+proteinase+%283CL-PRO%29&column=ki&startPg=0&Increment=50&submit=Search			2744846	46511816						ZINC02153371	1	MESLVLGVNEKTHVQLSLPVLQVRDVLVRGFGDSVEEALSEAREHLKNGTCGLVELEKGVLPQLEQPYVFIKRSDALSTNHGHKVVELVAEMDGIQYGRSGITLGVLVPHVGETPIAYRNVLLRKNGNKGAGGHSYGIDLKSYDLGDELGTDPIEDYEQNWNTKHGSGALRELTRELNGGAVTRYVDNNFCGPDGYPLDCIKDFLARAGKSMCTLSEQLDYIESKRGVYCCRDHEHEIAWFTERSDKSYEHQTPFEIKSAKKFDTFKGECPKFVFPLNSKVKVIQPRVEKKKTEGFMGRIRSVYPVASPQECNNMHLSTLMKCNHCDEVSWQTCDFLKATCEHCGTENLVIEGPTTCGYLPTNAVVKMPCPACQDPEIGPEHSVADYHNHSNIETRLRK…	1Q2W,1QZ8,1UJ1,1UK2,1UK3,1UK4,1UW7,1WOF,1Z1I,2A5A,2A5I,2A5K,2ACF,2AHM,2ALV,2AMD,2AMQ,2BX3,2BX4,2C3S,2D2D,2DUC,2FAV,2FE8,2FYG,2G9T,2GA6,2GDT,2GRI,2GT7,2GT8,2GTB,2GX4,2GZ7,2GZ8,2GZ9,2H2Z,2HOB,2HSX,2IDY,2JZF,2K7X,2K87,2KAF,2LIZ,2OP9,2OZK,2RNK,2V6N,2VJ1,2XYQ,2XYR,2XYV,2Z3C,2Z3D,2Z3E,2Z94,2Z9G,2Z9J,2Z9K,2Z9L,2ZU4,2ZU5,3D62,3E91,3E9S,3EA7,3EA8,3EBN,3IWM,3M3V,3MJ5,3R24,3SN8,3SNA,3SNB,3SNC,3SND,3SNE,3SZN…	Replicase polyprotein 1ab	R1AB_CVHSA	P0C6X7	P59641,Q6WGN0,Q7T697,Q808C0,Q80BV7,Q80BV8,Q80E51
19514	Clc1ccc(NC(=O)CSc2nccc(n2)-c2cc(no2)-c2ccccc2)cc1	InChI=1S/C21H15ClN4O2S/c22-15-6-8-16(9-7-15)24-20(27)13-29-21-23-11-10-17(25-21)19-12-18(26-28-19)14-4-2-1-3-5-14/h1-12H,13H2,(H,24,27)	TUBDEXWKZSAMKH-UHFFFAOYSA-N	11269	N-(4-chlorophenyl)-2-{[4-(3-phenyl-1,2-oxazol-5-yl)pyrimidin-2-yl]sulfanyl}acetamide::pyrimidine-containing compound 6	3C-like proteinase (3CL-PRO)	Human SARS coronavirus		15000					7	25.00 C	Curated from the literature by BindingDB	10.1021/jm050852f	16759091			Tsai, KC; Chen, SY; Liang, PH; Lu, IL; Mahindroo, N; Hsieh, HP; Chao, YS; Liu, L; Liu, D; Lien, W; Lin, TH; Wu, SY	National Tsing Hua University	http://www.bindingdb.org/bind/chemsearch/marvin/MolStructure.jsp?monomerid=11269	http://www.bindingdb.org/jsp/dbsearch/PrimarySearch_ki.jsp?energyterm=kJ/mole&tag=pol&polymerid=4753&target=3C-like+proteinase+%283CL-PRO%29&column=ki&startPg=0&Increment=50&submit=Search	http://www.bindingdb.org/jsp/dbsearch/PrimarySearch_ki.jsp?energyterm=kJ/mole&tag=r21&monomerid=11269&enzyme=3C-like+proteinase+%283CL-PRO%29&column=ki&startPg=0&Increment=50&submit=Search			2745617	46511817						ZINC01031719	1	MESLVLGVNEKTHVQLSLPVLQVRDVLVRGFGDSVEEALSEAREHLKNGTCGLVELEKGVLPQLEQPYVFIKRSDALSTNHGHKVVELVAEMDGIQYGRSGITLGVLVPHVGETPIAYRNVLLRKNGNKGAGGHSYGIDLKSYDLGDELGTDPIEDYEQNWNTKHGSGALRELTRELNGGAVTRYVDNNFCGPDGYPLDCIKDFLARAGKSMCTLSEQLDYIESKRGVYCCRDHEHEIAWFTERSDKSYEHQTPFEIKSAKKFDTFKGECPKFVFPLNSKVKVIQPRVEKKKTEGFMGRIRSVYPVASPQECNNMHLSTLMKCNHCDEVSWQTCDFLKATCEHCGTENLVIEGPTTCGYLPTNAVVKMPCPACQDPEIGPEHSVADYHNHSNIETRLRK…	1Q2W,1QZ8,1UJ1,1UK2,1UK3,1UK4,1UW7,1WOF,1Z1I,2A5A,2A5I,2A5K,2ACF,2AHM,2ALV,2AMD,2AMQ,2BX3,2BX4,2C3S,2D2D,2DUC,2FAV,2FE8,2FYG,2G9T,2GA6,2GDT,2GRI,2GT7,2GT8,2GTB,2GX4,2GZ7,2GZ8,2GZ9,2H2Z,2HOB,2HSX,2IDY,2JZF,2K7X,2K87,2KAF,2LIZ,2OP9,2OZK,2RNK,2V6N,2VJ1,2XYQ,2XYR,2XYV,2Z3C,2Z3D,2Z3E,2Z94,2Z9G,2Z9J,2Z9K,2Z9L,2ZU4,2ZU5,3D62,3E91,3E9S,3EA7,3EA8,3EBN,3IWM,3M3V,3MJ5,3R24,3SN8,3SNA,3SNB,3SNC,3SND,3SNE,3SZN…	Replicase polyprotein 1ab	R1AB_CVHSA	P0C6X7	P59641,Q6WGN0,Q7T697,Q808C0,Q80BV7,Q80BV8,Q80E51
19515	FC(F)(F)c1ccc(NC(=O)CSc2nccc(n2)-c2cc(no2)-c2ccc(Cl)cc2Cl)cc1	InChI=1S/C22H13Cl2F3N4O2S/c23-13-3-6-15(16(24)9-13)18-10-19(33-31-18)17-7-8-28-21(30-17)34-11-20(32)29-14-4-1-12(2-5-14)22(25,26)27/h1-10H,11H2,(H,29,32)	QECWOSUSNVKLGQ-UHFFFAOYSA-N	11270	2-({4-[3-(2,4-dichlorophenyl)-1,2-oxazol-5-yl]pyrimidin-2-yl}sulfanyl)-N-[4-(trifluoromethyl)phenyl]acetamide::pyrimidine-containing compound 7	3C-like proteinase (3CL-PRO)	Human SARS coronavirus		15000					7	25.00 C	Curated from the literature by BindingDB	10.1021/jm050852f	16759091			Tsai, KC; Chen, SY; Liang, PH; Lu, IL; Mahindroo, N; Hsieh, HP; Chao, YS; Liu, L; Liu, D; Lien, W; Lin, TH; Wu, SY	National Tsing Hua University	http://www.bindingdb.org/bind/chemsearch/marvin/MolStructure.jsp?monomerid=11270	http://www.bindingdb.org/jsp/dbsearch/PrimarySearch_ki.jsp?energyterm=kJ/mole&tag=pol&polymerid=4753&target=3C-like+proteinase+%283CL-PRO%29&column=ki&startPg=0&Increment=50&submit=Search	http://www.bindingdb.org/jsp/dbsearch/PrimarySearch_ki.jsp?energyterm=kJ/mole&tag=r21&monomerid=11270&enzyme=3C-like+proteinase+%283CL-PRO%29&column=ki&startPg=0&Increment=50&submit=Search			2745640	46511818						ZINC02143859	1	MESLVLGVNEKTHVQLSLPVLQVRDVLVRGFGDSVEEALSEAREHLKNGTCGLVELEKGVLPQLEQPYVFIKRSDALSTNHGHKVVELVAEMDGIQYGRSGITLGVLVPHVGETPIAYRNVLLRKNGNKGAGGHSYGIDLKSYDLGDELGTDPIEDYEQNWNTKHGSGALRELTRELNGGAVTRYVDNNFCGPDGYPLDCIKDFLARAGKSMCTLSEQLDYIESKRGVYCCRDHEHEIAWFTERSDKSYEHQTPFEIKSAKKFDTFKGECPKFVFPLNSKVKVIQPRVEKKKTEGFMGRIRSVYPVASPQECNNMHLSTLMKCNHCDEVSWQTCDFLKATCEHCGTENLVIEGPTTCGYLPTNAVVKMPCPACQDPEIGPEHSVADYHNHSNIETRLRK…	1Q2W,1QZ8,1UJ1,1UK2,1UK3,1UK4,1UW7,1WOF,1Z1I,2A5A,2A5I,2A5K,2ACF,2AHM,2ALV,2AMD,2AMQ,2BX3,2BX4,2C3S,2D2D,2DUC,2FAV,2FE8,2FYG,2G9T,2GA6,2GDT,2GRI,2GT7,2GT8,2GTB,2GX4,2GZ7,2GZ8,2GZ9,2H2Z,2HOB,2HSX,2IDY,2JZF,2K7X,2K87,2KAF,2LIZ,2OP9,2OZK,2RNK,2V6N,2VJ1,2XYQ,2XYR,2XYV,2Z3C,2Z3D,2Z3E,2Z94,2Z9G,2Z9J,2Z9K,2Z9L,2ZU4,2ZU5,3D62,3E91,3E9S,3EA7,3EA8,3EBN,3IWM,3M3V,3MJ5,3R24,3SN8,3SNA,3SNB,3SNC,3SND,3SNE,3SZN…	Replicase polyprotein 1ab	R1AB_CVHSA	P0C6X7	P59641,Q6WGN0,Q7T697,Q808C0,Q80BV7,Q80BV8,Q80E51
19516	Clc1ccc(NC(=O)CSc2nccc(n2)-c2cc(no2)-c2ccccc2Cl)cc1	InChI=1S/C21H14Cl2N4O2S/c22-13-5-7-14(8-6-13)25-20(28)12-30-21-24-10-9-17(26-21)19-11-18(27-29-19)15-3-1-2-4-16(15)23/h1-11H,12H2,(H,25,28)	UQVHELVNDYDRGX-UHFFFAOYSA-N	11271	N-(4-chlorophenyl)-2-({4-[3-(2-chlorophenyl)-1,2-oxazol-5-yl]pyrimidin-2-yl}sulfanyl)acetamide::pyrimidine-containing compound 8	3C-like proteinase (3CL-PRO)	Human SARS coronavirus		15000					7	25.00 C	Curated from the literature by BindingDB	10.1021/jm050852f	16759091			Tsai, KC; Chen, SY; Liang, PH; Lu, IL; Mahindroo, N; Hsieh, HP; Chao, YS; Liu, L; Liu, D; Lien, W; Lin, TH; Wu, SY	National Tsing Hua University	http://www.bindingdb.org/bind/chemsearch/marvin/MolStructure.jsp?monomerid=11271	http://www.bindingdb.org/jsp/dbsearch/PrimarySearch_ki.jsp?energyterm=kJ/mole&tag=pol&polymerid=4753&target=3C-like+proteinase+%283CL-PRO%29&column=ki&startPg=0&Increment=50&submit=Search	http://www.bindingdb.org/jsp/dbsearch/PrimarySearch_ki.jsp?energyterm=kJ/mole&tag=r21&monomerid=11271&enzyme=3C-like+proteinase+%283CL-PRO%29&column=ki&startPg=0&Increment=50&submit=Search			2745653	46511819						ZINC01031786	1	MESLVLGVNEKTHVQLSLPVLQVRDVLVRGFGDSVEEALSEAREHLKNGTCGLVELEKGVLPQLEQPYVFIKRSDALSTNHGHKVVELVAEMDGIQYGRSGITLGVLVPHVGETPIAYRNVLLRKNGNKGAGGHSYGIDLKSYDLGDELGTDPIEDYEQNWNTKHGSGALRELTRELNGGAVTRYVDNNFCGPDGYPLDCIKDFLARAGKSMCTLSEQLDYIESKRGVYCCRDHEHEIAWFTERSDKSYEHQTPFEIKSAKKFDTFKGECPKFVFPLNSKVKVIQPRVEKKKTEGFMGRIRSVYPVASPQECNNMHLSTLMKCNHCDEVSWQTCDFLKATCEHCGTENLVIEGPTTCGYLPTNAVVKMPCPACQDPEIGPEHSVADYHNHSNIETRLRK…	1Q2W,1QZ8,1UJ1,1UK2,1UK3,1UK4,1UW7,1WOF,1Z1I,2A5A,2A5I,2A5K,2ACF,2AHM,2ALV,2AMD,2AMQ,2BX3,2BX4,2C3S,2D2D,2DUC,2FAV,2FE8,2FYG,2G9T,2GA6,2GDT,2GRI,2GT7,2GT8,2GTB,2GX4,2GZ7,2GZ8,2GZ9,2H2Z,2HOB,2HSX,2IDY,2JZF,2K7X,2K87,2KAF,2LIZ,2OP9,2OZK,2RNK,2V6N,2VJ1,2XYQ,2XYR,2XYV,2Z3C,2Z3D,2Z3E,2Z94,2Z9G,2Z9J,2Z9K,2Z9L,2ZU4,2ZU5,3D62,3E91,3E9S,3EA7,3EA8,3EBN,3IWM,3M3V,3MJ5,3R24,3SN8,3SNA,3SNB,3SNC,3SND,3SNE,3SZN…	Replicase polyprotein 1ab	R1AB_CVHSA	P0C6X7	P59641,Q6WGN0,Q7T697,Q808C0,Q80BV7,Q80BV8,Q80E51
19517	CCCc1cc(=O)[nH]c(SCC(=O)Nc2ccc(Cl)cc2)n1	InChI=1S/C15H16ClN3O2S/c1-2-3-12-8-13(20)19-15(18-12)22-9-14(21)17-11-6-4-10(16)5-7-11/h4-8H,2-3,9H2,1H3,(H,17,21)(H,18,19,20)	YBWHJLWKGZIQNQ-UHFFFAOYSA-N	11272	N-(4-chlorophenyl)-2-[(4-hydroxy-6-propylpyrimidin-2-yl)sulfanyl]acetamide::pyrimidine-containing compound 9	3C-like proteinase (3CL-PRO)	Human SARS coronavirus		30000					7	25.00 C	Curated from the literature by BindingDB	10.1021/jm050852f	16759091			Tsai, KC; Chen, SY; Liang, PH; Lu, IL; Mahindroo, N; Hsieh, HP; Chao, YS; Liu, L; Liu, D; Lien, W; Lin, TH; Wu, SY	National Tsing Hua University	http://www.bindingdb.org/bind/chemsearch/marvin/MolStructure.jsp?monomerid=11272	http://www.bindingdb.org/jsp/dbsearch/PrimarySearch_ki.jsp?energyterm=kJ/mole&tag=pol&polymerid=4753&target=3C-like+proteinase+%283CL-PRO%29&column=ki&startPg=0&Increment=50&submit=Search	http://www.bindingdb.org/jsp/dbsearch/PrimarySearch_ki.jsp?energyterm=kJ/mole&tag=r21&monomerid=11272&enzyme=3C-like+proteinase+%283CL-PRO%29&column=ki&startPg=0&Increment=50&submit=Search			763192	46509360						ZINC05043294	1	MESLVLGVNEKTHVQLSLPVLQVRDVLVRGFGDSVEEALSEAREHLKNGTCGLVELEKGVLPQLEQPYVFIKRSDALSTNHGHKVVELVAEMDGIQYGRSGITLGVLVPHVGETPIAYRNVLLRKNGNKGAGGHSYGIDLKSYDLGDELGTDPIEDYEQNWNTKHGSGALRELTRELNGGAVTRYVDNNFCGPDGYPLDCIKDFLARAGKSMCTLSEQLDYIESKRGVYCCRDHEHEIAWFTERSDKSYEHQTPFEIKSAKKFDTFKGECPKFVFPLNSKVKVIQPRVEKKKTEGFMGRIRSVYPVASPQECNNMHLSTLMKCNHCDEVSWQTCDFLKATCEHCGTENLVIEGPTTCGYLPTNAVVKMPCPACQDPEIGPEHSVADYHNHSNIETRLRK…	1Q2W,1QZ8,1UJ1,1UK2,1UK3,1UK4,1UW7,1WOF,1Z1I,2A5A,2A5I,2A5K,2ACF,2AHM,2ALV,2AMD,2AMQ,2BX3,2BX4,2C3S,2D2D,2DUC,2FAV,2FE8,2FYG,2G9T,2GA6,2GDT,2GRI,2GT7,2GT8,2GTB,2GX4,2GZ7,2GZ8,2GZ9,2H2Z,2HOB,2HSX,2IDY,2JZF,2K7X,2K87,2KAF,2LIZ,2OP9,2OZK,2RNK,2V6N,2VJ1,2XYQ,2XYR,2XYV,2Z3C,2Z3D,2Z3E,2Z94,2Z9G,2Z9J,2Z9K,2Z9L,2ZU4,2ZU5,3D62,3E91,3E9S,3EA7,3EA8,3EBN,3IWM,3M3V,3MJ5,3R24,3SN8,3SNA,3SNB,3SNC,3SND,3SNE,3SZN…	Replicase polyprotein 1ab	R1AB_CVHSA	P0C6X7	P59641,Q6WGN0,Q7T697,Q808C0,Q80BV7,Q80BV8,Q80E51
19518	COc1cccc(c1)-c1nc(SCC(=O)Nc2ccc(cc2)S(N)(=O)=O)[nH]c(=O)c1C#N	InChI=1S/C20H17N5O5S2/c1-30-14-4-2-3-12(9-14)18-16(10-21)19(27)25-20(24-18)31-11-17(26)23-13-5-7-15(8-6-13)32(22,28)29/h2-9H,11H2,1H3,(H,23,26)(H2,22,28,29)(H,24,25,27)	MFBIUOFKXQKEGQ-UHFFFAOYSA-N	11273	2-{[5-cyano-4-(3-methoxyphenyl)-6-oxo-1,6-dihydropyrimidin-2-yl]sulfanyl}-N-(4-sulfamoylphenyl)acetamide::CHEMBL210497::pyrimidinone-containing compound 10	3C-like proteinase (3CL-PRO)	Human SARS coronavirus		40000					7	25.00 C	Curated from the literature by BindingDB	10.1021/jm050852f	16759091			Tsai, KC; Chen, SY; Liang, PH; Lu, IL; Mahindroo, N; Hsieh, HP; Chao, YS; Liu, L; Liu, D; Lien, W; Lin, TH; Wu, SY	National Tsing Hua University	http://www.bindingdb.org/bind/chemsearch/marvin/MolStructure.jsp?monomerid=11273	http://www.bindingdb.org/jsp/dbsearch/PrimarySearch_ki.jsp?energyterm=kJ/mole&tag=pol&polymerid=4753&target=3C-like+proteinase+%283CL-PRO%29&column=ki&startPg=0&Increment=50&submit=Search	http://www.bindingdb.org/jsp/dbsearch/PrimarySearch_ki.jsp?energyterm=kJ/mole&tag=r21&monomerid=11273&enzyme=3C-like+proteinase+%283CL-PRO%29&column=ki&startPg=0&Increment=50&submit=Search			2292729	46511820		CHEMBL210497				ZINC02995601	1	MESLVLGVNEKTHVQLSLPVLQVRDVLVRGFGDSVEEALSEAREHLKNGTCGLVELEKGVLPQLEQPYVFIKRSDALSTNHGHKVVELVAEMDGIQYGRSGITLGVLVPHVGETPIAYRNVLLRKNGNKGAGGHSYGIDLKSYDLGDELGTDPIEDYEQNWNTKHGSGALRELTRELNGGAVTRYVDNNFCGPDGYPLDCIKDFLARAGKSMCTLSEQLDYIESKRGVYCCRDHEHEIAWFTERSDKSYEHQTPFEIKSAKKFDTFKGECPKFVFPLNSKVKVIQPRVEKKKTEGFMGRIRSVYPVASPQECNNMHLSTLMKCNHCDEVSWQTCDFLKATCEHCGTENLVIEGPTTCGYLPTNAVVKMPCPACQDPEIGPEHSVADYHNHSNIETRLRK…	1Q2W,1QZ8,1UJ1,1UK2,1UK3,1UK4,1UW7,1WOF,1Z1I,2A5A,2A5I,2A5K,2ACF,2AHM,2ALV,2AMD,2AMQ,2BX3,2BX4,2C3S,2D2D,2DUC,2FAV,2FE8,2FYG,2G9T,2GA6,2GDT,2GRI,2GT7,2GT8,2GTB,2GX4,2GZ7,2GZ8,2GZ9,2H2Z,2HOB,2HSX,2IDY,2JZF,2K7X,2K87,2KAF,2LIZ,2OP9,2OZK,2RNK,2V6N,2VJ1,2XYQ,2XYR,2XYV,2Z3C,2Z3D,2Z3E,2Z94,2Z9G,2Z9J,2Z9K,2Z9L,2ZU4,2ZU5,3D62,3E91,3E9S,3EA7,3EA8,3EBN,3IWM,3M3V,3MJ5,3R24,3SN8,3SNA,3SNB,3SNC,3SND,3SNE,3SZN…	Replicase polyprotein 1ab	R1AB_CVHSA	P0C6X7	P59641,Q6WGN0,Q7T697,Q808C0,Q80BV7,Q80BV8,Q80E51
19519	CC(C)c1ccc(NC(=O)CSc2nccc(n2)-c2cccs2)cc1	InChI=1S/C19H19N3OS2/c1-13(2)14-5-7-15(8-6-14)21-18(23)12-25-19-20-10-9-16(22-19)17-4-3-11-24-17/h3-11,13H,12H2,1-2H3,(H,21,23)	UUBHDKPSKIQBFE-UHFFFAOYSA-N	11274	N-[4-(propan-2-yl)phenyl]-2-{[4-(thiophen-2-yl)pyrimidin-2-yl]sulfanyl}acetamide::pyrimidine-containing compound 11	3C-like proteinase (3CL-PRO)	Human SARS coronavirus		40000					7	25.00 C	Curated from the literature by BindingDB	10.1021/jm050852f	16759091			Tsai, KC; Chen, SY; Liang, PH; Lu, IL; Mahindroo, N; Hsieh, HP; Chao, YS; Liu, L; Liu, D; Lien, W; Lin, TH; Wu, SY	National Tsing Hua University	http://www.bindingdb.org/bind/chemsearch/marvin/MolStructure.jsp?monomerid=11274	http://www.bindingdb.org/jsp/dbsearch/PrimarySearch_ki.jsp?energyterm=kJ/mole&tag=pol&polymerid=4753&target=3C-like+proteinase+%283CL-PRO%29&column=ki&startPg=0&Increment=50&submit=Search	http://www.bindingdb.org/jsp/dbsearch/PrimarySearch_ki.jsp?energyterm=kJ/mole&tag=r21&monomerid=11274&enzyme=3C-like+proteinase+%283CL-PRO%29&column=ki&startPg=0&Increment=50&submit=Search			2811874	46511821						ZINC04324994	1	MESLVLGVNEKTHVQLSLPVLQVRDVLVRGFGDSVEEALSEAREHLKNGTCGLVELEKGVLPQLEQPYVFIKRSDALSTNHGHKVVELVAEMDGIQYGRSGITLGVLVPHVGETPIAYRNVLLRKNGNKGAGGHSYGIDLKSYDLGDELGTDPIEDYEQNWNTKHGSGALRELTRELNGGAVTRYVDNNFCGPDGYPLDCIKDFLARAGKSMCTLSEQLDYIESKRGVYCCRDHEHEIAWFTERSDKSYEHQTPFEIKSAKKFDTFKGECPKFVFPLNSKVKVIQPRVEKKKTEGFMGRIRSVYPVASPQECNNMHLSTLMKCNHCDEVSWQTCDFLKATCEHCGTENLVIEGPTTCGYLPTNAVVKMPCPACQDPEIGPEHSVADYHNHSNIETRLRK…	1Q2W,1QZ8,1UJ1,1UK2,1UK3,1UK4,1UW7,1WOF,1Z1I,2A5A,2A5I,2A5K,2ACF,2AHM,2ALV,2AMD,2AMQ,2BX3,2BX4,2C3S,2D2D,2DUC,2FAV,2FE8,2FYG,2G9T,2GA6,2GDT,2GRI,2GT7,2GT8,2GTB,2GX4,2GZ7,2GZ8,2GZ9,2H2Z,2HOB,2HSX,2IDY,2JZF,2K7X,2K87,2KAF,2LIZ,2OP9,2OZK,2RNK,2V6N,2VJ1,2XYQ,2XYR,2XYV,2Z3C,2Z3D,2Z3E,2Z94,2Z9G,2Z9J,2Z9K,2Z9L,2ZU4,2ZU5,3D62,3E91,3E9S,3EA7,3EA8,3EBN,3IWM,3M3V,3MJ5,3R24,3SN8,3SNA,3SNB,3SNC,3SND,3SNE,3SZN…	Replicase polyprotein 1ab	R1AB_CVHSA	P0C6X7	P59641,Q6WGN0,Q7T697,Q808C0,Q80BV7,Q80BV8,Q80E51
19520	COc1ccc(NC(=O)CSc2nc(cc(=O)[nH]2)-c2ccccc2)cc1OC	InChI=1S/C20H19N3O4S/c1-26-16-9-8-14(10-17(16)27-2)21-19(25)12-28-20-22-15(11-18(24)23-20)13-6-4-3-5-7-13/h3-11H,12H2,1-2H3,(H,21,25)(H,22,23,24)	KIFWJAVYYRTXDP-UHFFFAOYSA-N	11275	N-(3,4-dimethoxyphenyl)-2-[(4-hydroxy-6-phenylpyrimidin-2-yl)sulfanyl]acetamide::pyrimidine-containing compound 12	3C-like proteinase (3CL-PRO)	Human SARS coronavirus		45000					7	25.00 C	Curated from the literature by BindingDB	10.1021/jm050852f	16759091			Tsai, KC; Chen, SY; Liang, PH; Lu, IL; Mahindroo, N; Hsieh, HP; Chao, YS; Liu, L; Liu, D; Lien, W; Lin, TH; Wu, SY	National Tsing Hua University	http://www.bindingdb.org/bind/chemsearch/marvin/MolStructure.jsp?monomerid=11275	http://www.bindingdb.org/jsp/dbsearch/PrimarySearch_ki.jsp?energyterm=kJ/mole&tag=pol&polymerid=4753&target=3C-like+proteinase+%283CL-PRO%29&column=ki&startPg=0&Increment=50&submit=Search	http://www.bindingdb.org/jsp/dbsearch/PrimarySearch_ki.jsp?energyterm=kJ/mole&tag=r21&monomerid=11275&enzyme=3C-like+proteinase+%283CL-PRO%29&column=ki&startPg=0&Increment=50&submit=Search			1128176	46511822						ZINC18023199	1	MESLVLGVNEKTHVQLSLPVLQVRDVLVRGFGDSVEEALSEAREHLKNGTCGLVELEKGVLPQLEQPYVFIKRSDALSTNHGHKVVELVAEMDGIQYGRSGITLGVLVPHVGETPIAYRNVLLRKNGNKGAGGHSYGIDLKSYDLGDELGTDPIEDYEQNWNTKHGSGALRELTRELNGGAVTRYVDNNFCGPDGYPLDCIKDFLARAGKSMCTLSEQLDYIESKRGVYCCRDHEHEIAWFTERSDKSYEHQTPFEIKSAKKFDTFKGECPKFVFPLNSKVKVIQPRVEKKKTEGFMGRIRSVYPVASPQECNNMHLSTLMKCNHCDEVSWQTCDFLKATCEHCGTENLVIEGPTTCGYLPTNAVVKMPCPACQDPEIGPEHSVADYHNHSNIETRLRK…	1Q2W,1QZ8,1UJ1,1UK2,1UK3,1UK4,1UW7,1WOF,1Z1I,2A5A,2A5I,2A5K,2ACF,2AHM,2ALV,2AMD,2AMQ,2BX3,2BX4,2C3S,2D2D,2DUC,2FAV,2FE8,2FYG,2G9T,2GA6,2GDT,2GRI,2GT7,2GT8,2GTB,2GX4,2GZ7,2GZ8,2GZ9,2H2Z,2HOB,2HSX,2IDY,2JZF,2K7X,2K87,2KAF,2LIZ,2OP9,2OZK,2RNK,2V6N,2VJ1,2XYQ,2XYR,2XYV,2Z3C,2Z3D,2Z3E,2Z94,2Z9G,2Z9J,2Z9K,2Z9L,2ZU4,2ZU5,3D62,3E91,3E9S,3EA7,3EA8,3EBN,3IWM,3M3V,3MJ5,3R24,3SN8,3SNA,3SNB,3SNC,3SND,3SNE,3SZN…	Replicase polyprotein 1ab	R1AB_CVHSA	P0C6X7	P59641,Q6WGN0,Q7T697,Q808C0,Q80BV7,Q80BV8,Q80E51
19521	COc1cccc(c1)-c1nc(SCC(=O)Nc2ccc(cc2)C(C)=O)[nH]c(=O)c1C#N	InChI=1S/C22H18N4O4S/c1-13(27)14-6-8-16(9-7-14)24-19(28)12-31-22-25-20(18(11-23)21(29)26-22)15-4-3-5-17(10-15)30-2/h3-10H,12H2,1-2H3,(H,24,28)(H,25,26,29)	PWZKDBYJLZTANB-UHFFFAOYSA-N	11276	2-{[5-cyano-4-(3-methoxyphenyl)-6-oxo-1,6-dihydropyrimidin-2-yl]sulfanyl}-N-(4-acetylphenyl)acetamide::pyrimidinone-containing compound 13	3C-like proteinase (3CL-PRO)	Human SARS coronavirus		60000					7	25.00 C	Curated from the literature by BindingDB	10.1021/jm050852f	16759091			Tsai, KC; Chen, SY; Liang, PH; Lu, IL; Mahindroo, N; Hsieh, HP; Chao, YS; Liu, L; Liu, D; Lien, W; Lin, TH; Wu, SY	National Tsing Hua University	http://www.bindingdb.org/bind/chemsearch/marvin/MolStructure.jsp?monomerid=11276	http://www.bindingdb.org/jsp/dbsearch/PrimarySearch_ki.jsp?energyterm=kJ/mole&tag=pol&polymerid=4753&target=3C-like+proteinase+%283CL-PRO%29&column=ki&startPg=0&Increment=50&submit=Search	http://www.bindingdb.org/jsp/dbsearch/PrimarySearch_ki.jsp?energyterm=kJ/mole&tag=r21&monomerid=11276&enzyme=3C-like+proteinase+%283CL-PRO%29&column=ki&startPg=0&Increment=50&submit=Search			2171126	46511823						ZINC02782840	1	MESLVLGVNEKTHVQLSLPVLQVRDVLVRGFGDSVEEALSEAREHLKNGTCGLVELEKGVLPQLEQPYVFIKRSDALSTNHGHKVVELVAEMDGIQYGRSGITLGVLVPHVGETPIAYRNVLLRKNGNKGAGGHSYGIDLKSYDLGDELGTDPIEDYEQNWNTKHGSGALRELTRELNGGAVTRYVDNNFCGPDGYPLDCIKDFLARAGKSMCTLSEQLDYIESKRGVYCCRDHEHEIAWFTERSDKSYEHQTPFEIKSAKKFDTFKGECPKFVFPLNSKVKVIQPRVEKKKTEGFMGRIRSVYPVASPQECNNMHLSTLMKCNHCDEVSWQTCDFLKATCEHCGTENLVIEGPTTCGYLPTNAVVKMPCPACQDPEIGPEHSVADYHNHSNIETRLRK…	1Q2W,1QZ8,1UJ1,1UK2,1UK3,1UK4,1UW7,1WOF,1Z1I,2A5A,2A5I,2A5K,2ACF,2AHM,2ALV,2AMD,2AMQ,2BX3,2BX4,2C3S,2D2D,2DUC,2FAV,2FE8,2FYG,2G9T,2GA6,2GDT,2GRI,2GT7,2GT8,2GTB,2GX4,2GZ7,2GZ8,2GZ9,2H2Z,2HOB,2HSX,2IDY,2JZF,2K7X,2K87,2KAF,2LIZ,2OP9,2OZK,2RNK,2V6N,2VJ1,2XYQ,2XYR,2XYV,2Z3C,2Z3D,2Z3E,2Z94,2Z9G,2Z9J,2Z9K,2Z9L,2ZU4,2ZU5,3D62,3E91,3E9S,3EA7,3EA8,3EBN,3IWM,3M3V,3MJ5,3R24,3SN8,3SNA,3SNB,3SNC,3SND,3SNE,3SZN…	Replicase polyprotein 1ab	R1AB_CVHSA	P0C6X7	P59641,Q6WGN0,Q7T697,Q808C0,Q80BV7,Q80BV8,Q80E51
19522	CCC(Sc1nc(-c2cccc(OC)c2)c(C#N)c(=O)[nH]1)C(=O)Nc1cccc(c1)C(C)=O	InChI=1/C24H22N4O4S/c1-4-20(23(31)26-17-9-5-7-15(11-17)14(2)29)33-24-27-21(19(13-25)22(30)28-24)16-8-6-10-18(12-16)32-3/h5-12,20H,4H2,1-3H3,(H,26,31)(H,27,28,30)	UNAFKZLBLWRTQK-UHFFFAOYNA-N	11277	2-{[5-cyano-4-(3-methoxyphenyl)-6-oxo-1,6-dihydropyrimidin-2-yl]sulfanyl}-N-(3-acetylphenyl)butanamide::pyrimidinone-containing compound 14	3C-like proteinase (3CL-PRO)	Human SARS coronavirus		60000					7	25.00 C	Curated from the literature by BindingDB	10.1021/jm050852f	16759091			Tsai, KC; Chen, SY; Liang, PH; Lu, IL; Mahindroo, N; Hsieh, HP; Chao, YS; Liu, L; Liu, D; Lien, W; Lin, TH; Wu, SY	National Tsing Hua University	http://www.bindingdb.org/bind/chemsearch/marvin/MolStructure.jsp?monomerid=11277	http://www.bindingdb.org/jsp/dbsearch/PrimarySearch_ki.jsp?energyterm=kJ/mole&tag=pol&polymerid=4753&target=3C-like+proteinase+%283CL-PRO%29&column=ki&startPg=0&Increment=50&submit=Search	http://www.bindingdb.org/jsp/dbsearch/PrimarySearch_ki.jsp?energyterm=kJ/mole&tag=r21&monomerid=11277&enzyme=3C-like+proteinase+%283CL-PRO%29&column=ki&startPg=0&Increment=50&submit=Search			2918614	46511824						ZINC06016526	1	MESLVLGVNEKTHVQLSLPVLQVRDVLVRGFGDSVEEALSEAREHLKNGTCGLVELEKGVLPQLEQPYVFIKRSDALSTNHGHKVVELVAEMDGIQYGRSGITLGVLVPHVGETPIAYRNVLLRKNGNKGAGGHSYGIDLKSYDLGDELGTDPIEDYEQNWNTKHGSGALRELTRELNGGAVTRYVDNNFCGPDGYPLDCIKDFLARAGKSMCTLSEQLDYIESKRGVYCCRDHEHEIAWFTERSDKSYEHQTPFEIKSAKKFDTFKGECPKFVFPLNSKVKVIQPRVEKKKTEGFMGRIRSVYPVASPQECNNMHLSTLMKCNHCDEVSWQTCDFLKATCEHCGTENLVIEGPTTCGYLPTNAVVKMPCPACQDPEIGPEHSVADYHNHSNIETRLRK…	1Q2W,1QZ8,1UJ1,1UK2,1UK3,1UK4,1UW7,1WOF,1Z1I,2A5A,2A5I,2A5K,2ACF,2AHM,2ALV,2AMD,2AMQ,2BX3,2BX4,2C3S,2D2D,2DUC,2FAV,2FE8,2FYG,2G9T,2GA6,2GDT,2GRI,2GT7,2GT8,2GTB,2GX4,2GZ7,2GZ8,2GZ9,2H2Z,2HOB,2HSX,2IDY,2JZF,2K7X,2K87,2KAF,2LIZ,2OP9,2OZK,2RNK,2V6N,2VJ1,2XYQ,2XYR,2XYV,2Z3C,2Z3D,2Z3E,2Z94,2Z9G,2Z9J,2Z9K,2Z9L,2ZU4,2ZU5,3D62,3E91,3E9S,3EA7,3EA8,3EBN,3IWM,3M3V,3MJ5,3R24,3SN8,3SNA,3SNB,3SNC,3SND,3SNE,3SZN…	Replicase polyprotein 1ab	R1AB_CVHSA	P0C6X7	P59641,Q6WGN0,Q7T697,Q808C0,Q80BV7,Q80BV8,Q80E51
19523	Cc1cc(=O)[nH]c(SCC(=O)Nc2cc(Cl)ccc2Oc2ccccc2)n1	InChI=1S/C19H16ClN3O3S/c1-12-9-17(24)23-19(21-12)27-11-18(25)22-15-10-13(20)7-8-16(15)26-14-5-3-2-4-6-14/h2-10H,11H2,1H3,(H,22,25)(H,21,23,24)	KROPIDGCKMSLKK-UHFFFAOYSA-N	11278	N-(5-chloro-2-phenoxyphenyl)-2-[(4-methyl-6-oxo-1,6-dihydropyrimidin-2-yl)sulfanyl]acetamide::pyrimidinone-containing compound 15	3C-like proteinase (3CL-PRO)	Human SARS coronavirus		100000							Curated from the literature by BindingDB	10.1021/jm050852f	16759091			Tsai, KC; Chen, SY; Liang, PH; Lu, IL; Mahindroo, N; Hsieh, HP; Chao, YS; Liu, L; Liu, D; Lien, W; Lin, TH; Wu, SY	National Tsing Hua University	http://www.bindingdb.org/bind/chemsearch/marvin/MolStructure.jsp?monomerid=11278	http://www.bindingdb.org/jsp/dbsearch/PrimarySearch_ki.jsp?energyterm=kJ/mole&tag=pol&polymerid=4753&target=3C-like+proteinase+%283CL-PRO%29&column=ki&startPg=0&Increment=50&submit=Search	http://www.bindingdb.org/jsp/dbsearch/PrimarySearch_ki.jsp?energyterm=kJ/mole&tag=r21&monomerid=11278&enzyme=3C-like+proteinase+%283CL-PRO%29&column=ki&startPg=0&Increment=50&submit=Search			1212367	46511825						ZINC18127668	1	MESLVLGVNEKTHVQLSLPVLQVRDVLVRGFGDSVEEALSEAREHLKNGTCGLVELEKGVLPQLEQPYVFIKRSDALSTNHGHKVVELVAEMDGIQYGRSGITLGVLVPHVGETPIAYRNVLLRKNGNKGAGGHSYGIDLKSYDLGDELGTDPIEDYEQNWNTKHGSGALRELTRELNGGAVTRYVDNNFCGPDGYPLDCIKDFLARAGKSMCTLSEQLDYIESKRGVYCCRDHEHEIAWFTERSDKSYEHQTPFEIKSAKKFDTFKGECPKFVFPLNSKVKVIQPRVEKKKTEGFMGRIRSVYPVASPQECNNMHLSTLMKCNHCDEVSWQTCDFLKATCEHCGTENLVIEGPTTCGYLPTNAVVKMPCPACQDPEIGPEHSVADYHNHSNIETRLRK…	1Q2W,1QZ8,1UJ1,1UK2,1UK3,1UK4,1UW7,1WOF,1Z1I,2A5A,2A5I,2A5K,2ACF,2AHM,2ALV,2AMD,2AMQ,2BX3,2BX4,2C3S,2D2D,2DUC,2FAV,2FE8,2FYG,2G9T,2GA6,2GDT,2GRI,2GT7,2GT8,2GTB,2GX4,2GZ7,2GZ8,2GZ9,2H2Z,2HOB,2HSX,2IDY,2JZF,2K7X,2K87,2KAF,2LIZ,2OP9,2OZK,2RNK,2V6N,2VJ1,2XYQ,2XYR,2XYV,2Z3C,2Z3D,2Z3E,2Z94,2Z9G,2Z9J,2Z9K,2Z9L,2ZU4,2ZU5,3D62,3E91,3E9S,3EA7,3EA8,3EBN,3IWM,3M3V,3MJ5,3R24,3SN8,3SNA,3SNB,3SNC,3SND,3SNE,3SZN…	Replicase polyprotein 1ab	R1AB_CVHSA	P0C6X7	P59641,Q6WGN0,Q7T697,Q808C0,Q80BV7,Q80BV8,Q80E51
19524	Cc1cc(=O)[nH]c(SCC(=O)Nc2ccc(Oc3ccc(Cl)cc3)cc2)n1	InChI=1S/C19H16ClN3O3S/c1-12-10-17(24)23-19(21-12)27-11-18(25)22-14-4-8-16(9-5-14)26-15-6-2-13(20)3-7-15/h2-10H,11H2,1H3,(H,22,25)(H,21,23,24)	ZUEMNPRILMWAIX-UHFFFAOYSA-N	11279	N-[4-(4-chlorophenoxy)phenyl]-2-[(4-hydroxy-6-methylpyrimidin-2-yl)sulfanyl]acetamide::pyrimidine-containing compound 16	3C-like proteinase (3CL-PRO)	Human SARS coronavirus		200000							Curated from the literature by BindingDB	10.1021/jm050852f	16759091			Tsai, KC; Chen, SY; Liang, PH; Lu, IL; Mahindroo, N; Hsieh, HP; Chao, YS; Liu, L; Liu, D; Lien, W; Lin, TH; Wu, SY	National Tsing Hua University	http://www.bindingdb.org/bind/chemsearch/marvin/MolStructure.jsp?monomerid=11279	http://www.bindingdb.org/jsp/dbsearch/PrimarySearch_ki.jsp?energyterm=kJ/mole&tag=pol&polymerid=4753&target=3C-like+proteinase+%283CL-PRO%29&column=ki&startPg=0&Increment=50&submit=Search	http://www.bindingdb.org/jsp/dbsearch/PrimarySearch_ki.jsp?energyterm=kJ/mole&tag=r21&monomerid=11279&enzyme=3C-like+proteinase+%283CL-PRO%29&column=ki&startPg=0&Increment=50&submit=Search			990824	46511826						ZINC18249845	1	MESLVLGVNEKTHVQLSLPVLQVRDVLVRGFGDSVEEALSEAREHLKNGTCGLVELEKGVLPQLEQPYVFIKRSDALSTNHGHKVVELVAEMDGIQYGRSGITLGVLVPHVGETPIAYRNVLLRKNGNKGAGGHSYGIDLKSYDLGDELGTDPIEDYEQNWNTKHGSGALRELTRELNGGAVTRYVDNNFCGPDGYPLDCIKDFLARAGKSMCTLSEQLDYIESKRGVYCCRDHEHEIAWFTERSDKSYEHQTPFEIKSAKKFDTFKGECPKFVFPLNSKVKVIQPRVEKKKTEGFMGRIRSVYPVASPQECNNMHLSTLMKCNHCDEVSWQTCDFLKATCEHCGTENLVIEGPTTCGYLPTNAVVKMPCPACQDPEIGPEHSVADYHNHSNIETRLRK…	1Q2W,1QZ8,1UJ1,1UK2,1UK3,1UK4,1UW7,1WOF,1Z1I,2A5A,2A5I,2A5K,2ACF,2AHM,2ALV,2AMD,2AMQ,2BX3,2BX4,2C3S,2D2D,2DUC,2FAV,2FE8,2FYG,2G9T,2GA6,2GDT,2GRI,2GT7,2GT8,2GTB,2GX4,2GZ7,2GZ8,2GZ9,2H2Z,2HOB,2HSX,2IDY,2JZF,2K7X,2K87,2KAF,2LIZ,2OP9,2OZK,2RNK,2V6N,2VJ1,2XYQ,2XYR,2XYV,2Z3C,2Z3D,2Z3E,2Z94,2Z9G,2Z9J,2Z9K,2Z9L,2ZU4,2ZU5,3D62,3E91,3E9S,3EA7,3EA8,3EBN,3IWM,3M3V,3MJ5,3R24,3SN8,3SNA,3SNB,3SNC,3SND,3SNE,3SZN…	Replicase polyprotein 1ab	R1AB_CVHSA	P0C6X7	P59641,Q6WGN0,Q7T697,Q808C0,Q80BV7,Q80BV8,Q80E51
19525	CC(C)c1ccc(NC(=O)CSc2nccc(n2)-c2csc(COc3ccccc3Cl)n2)cc1	InChI=1S/C25H23ClN4O2S2/c1-16(2)17-7-9-18(10-8-17)28-23(31)15-34-25-27-12-11-20(30-25)21-14-33-24(29-21)13-32-22-6-4-3-5-19(22)26/h3-12,14,16H,13,15H2,1-2H3,(H,28,31)	FAICNNMEVHYSOP-UHFFFAOYSA-N	11280	2-({4-[2-(2-chlorophenoxymethyl)-1,3-thiazol-4-yl]pyrimidin-2-yl}sulfanyl)-N-[4-(propan-2-yl)phenyl]acetamide::pyrimidine-containing compound 17	3C-like proteinase (3CL-PRO)	Human SARS coronavirus		200000							Curated from the literature by BindingDB	10.1021/jm050852f	16759091			Tsai, KC; Chen, SY; Liang, PH; Lu, IL; Mahindroo, N; Hsieh, HP; Chao, YS; Liu, L; Liu, D; Lien, W; Lin, TH; Wu, SY	National Tsing Hua University	http://www.bindingdb.org/bind/chemsearch/marvin/MolStructure.jsp?monomerid=11280	http://www.bindingdb.org/jsp/dbsearch/PrimarySearch_ki.jsp?energyterm=kJ/mole&tag=pol&polymerid=4753&target=3C-like+proteinase+%283CL-PRO%29&column=ki&startPg=0&Increment=50&submit=Search	http://www.bindingdb.org/jsp/dbsearch/PrimarySearch_ki.jsp?energyterm=kJ/mole&tag=r21&monomerid=11280&enzyme=3C-like+proteinase+%283CL-PRO%29&column=ki&startPg=0&Increment=50&submit=Search			2744870	46511827						ZINC01047818	1	MESLVLGVNEKTHVQLSLPVLQVRDVLVRGFGDSVEEALSEAREHLKNGTCGLVELEKGVLPQLEQPYVFIKRSDALSTNHGHKVVELVAEMDGIQYGRSGITLGVLVPHVGETPIAYRNVLLRKNGNKGAGGHSYGIDLKSYDLGDELGTDPIEDYEQNWNTKHGSGALRELTRELNGGAVTRYVDNNFCGPDGYPLDCIKDFLARAGKSMCTLSEQLDYIESKRGVYCCRDHEHEIAWFTERSDKSYEHQTPFEIKSAKKFDTFKGECPKFVFPLNSKVKVIQPRVEKKKTEGFMGRIRSVYPVASPQECNNMHLSTLMKCNHCDEVSWQTCDFLKATCEHCGTENLVIEGPTTCGYLPTNAVVKMPCPACQDPEIGPEHSVADYHNHSNIETRLRK…	1Q2W,1QZ8,1UJ1,1UK2,1UK3,1UK4,1UW7,1WOF,1Z1I,2A5A,2A5I,2A5K,2ACF,2AHM,2ALV,2AMD,2AMQ,2BX3,2BX4,2C3S,2D2D,2DUC,2FAV,2FE8,2FYG,2G9T,2GA6,2GDT,2GRI,2GT7,2GT8,2GTB,2GX4,2GZ7,2GZ8,2GZ9,2H2Z,2HOB,2HSX,2IDY,2JZF,2K7X,2K87,2KAF,2LIZ,2OP9,2OZK,2RNK,2V6N,2VJ1,2XYQ,2XYR,2XYV,2Z3C,2Z3D,2Z3E,2Z94,2Z9G,2Z9J,2Z9K,2Z9L,2ZU4,2ZU5,3D62,3E91,3E9S,3EA7,3EA8,3EBN,3IWM,3M3V,3MJ5,3R24,3SN8,3SNA,3SNB,3SNC,3SND,3SNE,3SZN…	Replicase polyprotein 1ab	R1AB_CVHSA	P0C6X7	P59641,Q6WGN0,Q7T697,Q808C0,Q80BV7,Q80BV8,Q80E51
19526	COC(OC)c1cc(=O)[nH]c(SCC(=O)Nc2ccc(cc2)C(F)(F)F)n1	InChI=1S/C16H16F3N3O4S/c1-25-14(26-2)11-7-12(23)22-15(21-11)27-8-13(24)20-10-5-3-9(4-6-10)16(17,18)19/h3-7,14H,8H2,1-2H3,(H,20,24)(H,21,22,23)	ZCGRJMKKUYGRMN-UHFFFAOYSA-N	11281	2-{[4-(dimethoxymethyl)-6-hydroxypyrimidin-2-yl]sulfanyl}-N-[4-(trifluoromethyl)phenyl]acetamide::pyrimidine-containing compound 18	3C-like proteinase (3CL-PRO)	Human SARS coronavirus		200000							Curated from the literature by BindingDB	10.1021/jm050852f	16759091			Tsai, KC; Chen, SY; Liang, PH; Lu, IL; Mahindroo, N; Hsieh, HP; Chao, YS; Liu, L; Liu, D; Lien, W; Lin, TH; Wu, SY	National Tsing Hua University	http://www.bindingdb.org/bind/chemsearch/marvin/MolStructure.jsp?monomerid=11281	http://www.bindingdb.org/jsp/dbsearch/PrimarySearch_ki.jsp?energyterm=kJ/mole&tag=pol&polymerid=4753&target=3C-like+proteinase+%283CL-PRO%29&column=ki&startPg=0&Increment=50&submit=Search	http://www.bindingdb.org/jsp/dbsearch/PrimarySearch_ki.jsp?energyterm=kJ/mole&tag=r21&monomerid=11281&enzyme=3C-like+proteinase+%283CL-PRO%29&column=ki&startPg=0&Increment=50&submit=Search			2745968	46511828						ZINC05176655	1	MESLVLGVNEKTHVQLSLPVLQVRDVLVRGFGDSVEEALSEAREHLKNGTCGLVELEKGVLPQLEQPYVFIKRSDALSTNHGHKVVELVAEMDGIQYGRSGITLGVLVPHVGETPIAYRNVLLRKNGNKGAGGHSYGIDLKSYDLGDELGTDPIEDYEQNWNTKHGSGALRELTRELNGGAVTRYVDNNFCGPDGYPLDCIKDFLARAGKSMCTLSEQLDYIESKRGVYCCRDHEHEIAWFTERSDKSYEHQTPFEIKSAKKFDTFKGECPKFVFPLNSKVKVIQPRVEKKKTEGFMGRIRSVYPVASPQECNNMHLSTLMKCNHCDEVSWQTCDFLKATCEHCGTENLVIEGPTTCGYLPTNAVVKMPCPACQDPEIGPEHSVADYHNHSNIETRLRK…	1Q2W,1QZ8,1UJ1,1UK2,1UK3,1UK4,1UW7,1WOF,1Z1I,2A5A,2A5I,2A5K,2ACF,2AHM,2ALV,2AMD,2AMQ,2BX3,2BX4,2C3S,2D2D,2DUC,2FAV,2FE8,2FYG,2G9T,2GA6,2GDT,2GRI,2GT7,2GT8,2GTB,2GX4,2GZ7,2GZ8,2GZ9,2H2Z,2HOB,2HSX,2IDY,2JZF,2K7X,2K87,2KAF,2LIZ,2OP9,2OZK,2RNK,2V6N,2VJ1,2XYQ,2XYR,2XYV,2Z3C,2Z3D,2Z3E,2Z94,2Z9G,2Z9J,2Z9K,2Z9L,2ZU4,2ZU5,3D62,3E91,3E9S,3EA7,3EA8,3EBN,3IWM,3M3V,3MJ5,3R24,3SN8,3SNA,3SNB,3SNC,3SND,3SNE,3SZN…	Replicase polyprotein 1ab	R1AB_CVHSA	P0C6X7	P59641,Q6WGN0,Q7T697,Q808C0,Q80BV7,Q80BV8,Q80E51
19527	CCCCc1ccc(NC(=O)CSc2nc(C3CCCCC3)c(C#N)c(=O)[nH]2)c(C)c1	InChI=1S/C24H30N4O2S/c1-3-4-8-17-11-12-20(16(2)13-17)26-21(29)15-31-24-27-22(18-9-6-5-7-10-18)19(14-25)23(30)28-24/h11-13,18H,3-10,15H2,1-2H3,(H,26,29)(H,27,28,30)	GBDKYZQJONYDPW-UHFFFAOYSA-N	11282	N-(4-butyl-2-methylphenyl)-2-[(5-cyano-4-cyclohexyl-6-oxo-1,6-dihydropyrimidin-2-yl)sulfanyl]acetamide::pyrimidinone-containing compound 19	3C-like proteinase (3CL-PRO)	Human SARS coronavirus		200000							Curated from the literature by BindingDB	10.1021/jm050852f	16759091			Tsai, KC; Chen, SY; Liang, PH; Lu, IL; Mahindroo, N; Hsieh, HP; Chao, YS; Liu, L; Liu, D; Lien, W; Lin, TH; Wu, SY	National Tsing Hua University	http://www.bindingdb.org/bind/chemsearch/marvin/MolStructure.jsp?monomerid=11282	http://www.bindingdb.org/jsp/dbsearch/PrimarySearch_ki.jsp?energyterm=kJ/mole&tag=pol&polymerid=4753&target=3C-like+proteinase+%283CL-PRO%29&column=ki&startPg=0&Increment=50&submit=Search	http://www.bindingdb.org/jsp/dbsearch/PrimarySearch_ki.jsp?energyterm=kJ/mole&tag=r21&monomerid=11282&enzyme=3C-like+proteinase+%283CL-PRO%29&column=ki&startPg=0&Increment=50&submit=Search			501651	46511829						ZINC08647806	1	MESLVLGVNEKTHVQLSLPVLQVRDVLVRGFGDSVEEALSEAREHLKNGTCGLVELEKGVLPQLEQPYVFIKRSDALSTNHGHKVVELVAEMDGIQYGRSGITLGVLVPHVGETPIAYRNVLLRKNGNKGAGGHSYGIDLKSYDLGDELGTDPIEDYEQNWNTKHGSGALRELTRELNGGAVTRYVDNNFCGPDGYPLDCIKDFLARAGKSMCTLSEQLDYIESKRGVYCCRDHEHEIAWFTERSDKSYEHQTPFEIKSAKKFDTFKGECPKFVFPLNSKVKVIQPRVEKKKTEGFMGRIRSVYPVASPQECNNMHLSTLMKCNHCDEVSWQTCDFLKATCEHCGTENLVIEGPTTCGYLPTNAVVKMPCPACQDPEIGPEHSVADYHNHSNIETRLRK…	1Q2W,1QZ8,1UJ1,1UK2,1UK3,1UK4,1UW7,1WOF,1Z1I,2A5A,2A5I,2A5K,2ACF,2AHM,2ALV,2AMD,2AMQ,2BX3,2BX4,2C3S,2D2D,2DUC,2FAV,2FE8,2FYG,2G9T,2GA6,2GDT,2GRI,2GT7,2GT8,2GTB,2GX4,2GZ7,2GZ8,2GZ9,2H2Z,2HOB,2HSX,2IDY,2JZF,2K7X,2K87,2KAF,2LIZ,2OP9,2OZK,2RNK,2V6N,2VJ1,2XYQ,2XYR,2XYV,2Z3C,2Z3D,2Z3E,2Z94,2Z9G,2Z9J,2Z9K,2Z9L,2ZU4,2ZU5,3D62,3E91,3E9S,3EA7,3EA8,3EBN,3IWM,3M3V,3MJ5,3R24,3SN8,3SNA,3SNB,3SNC,3SND,3SNE,3SZN…	Replicase polyprotein 1ab	R1AB_CVHSA	P0C6X7	P59641,Q6WGN0,Q7T697,Q808C0,Q80BV7,Q80BV8,Q80E51
19528	FC(F)(F)c1cccc(NC(=O)CSc2nc(-c3ccccc3)c(C#N)c(=O)[nH]2)c1	InChI=1S/C20H13F3N4O2S/c21-20(22,23)13-7-4-8-14(9-13)25-16(28)11-30-19-26-17(12-5-2-1-3-6-12)15(10-24)18(29)27-19/h1-9H,11H2,(H,25,28)(H,26,27,29)	FNZHACBCLXJSBM-UHFFFAOYSA-N	11283	2-[(5-cyano-6-oxo-4-phenyl-1,6-dihydropyrimidin-2-yl)sulfanyl]-N-[3-(trifluoromethyl)phenyl]acetamide::pyrimidinone-containing compound 20	3C-like proteinase (3CL-PRO)	Human SARS coronavirus		200000							Curated from the literature by BindingDB	10.1021/jm050852f	16759091			Tsai, KC; Chen, SY; Liang, PH; Lu, IL; Mahindroo, N; Hsieh, HP; Chao, YS; Liu, L; Liu, D; Lien, W; Lin, TH; Wu, SY	National Tsing Hua University	http://www.bindingdb.org/bind/chemsearch/marvin/MolStructure.jsp?monomerid=11283	http://www.bindingdb.org/jsp/dbsearch/PrimarySearch_ki.jsp?energyterm=kJ/mole&tag=pol&polymerid=4753&target=3C-like+proteinase+%283CL-PRO%29&column=ki&startPg=0&Increment=50&submit=Search	http://www.bindingdb.org/jsp/dbsearch/PrimarySearch_ki.jsp?energyterm=kJ/mole&tag=r21&monomerid=11283&enzyme=3C-like+proteinase+%283CL-PRO%29&column=ki&startPg=0&Increment=50&submit=Search			2167624	46511830						ZINC02758059	1	MESLVLGVNEKTHVQLSLPVLQVRDVLVRGFGDSVEEALSEAREHLKNGTCGLVELEKGVLPQLEQPYVFIKRSDALSTNHGHKVVELVAEMDGIQYGRSGITLGVLVPHVGETPIAYRNVLLRKNGNKGAGGHSYGIDLKSYDLGDELGTDPIEDYEQNWNTKHGSGALRELTRELNGGAVTRYVDNNFCGPDGYPLDCIKDFLARAGKSMCTLSEQLDYIESKRGVYCCRDHEHEIAWFTERSDKSYEHQTPFEIKSAKKFDTFKGECPKFVFPLNSKVKVIQPRVEKKKTEGFMGRIRSVYPVASPQECNNMHLSTLMKCNHCDEVSWQTCDFLKATCEHCGTENLVIEGPTTCGYLPTNAVVKMPCPACQDPEIGPEHSVADYHNHSNIETRLRK…	1Q2W,1QZ8,1UJ1,1UK2,1UK3,1UK4,1UW7,1WOF,1Z1I,2A5A,2A5I,2A5K,2ACF,2AHM,2ALV,2AMD,2AMQ,2BX3,2BX4,2C3S,2D2D,2DUC,2FAV,2FE8,2FYG,2G9T,2GA6,2GDT,2GRI,2GT7,2GT8,2GTB,2GX4,2GZ7,2GZ8,2GZ9,2H2Z,2HOB,2HSX,2IDY,2JZF,2K7X,2K87,2KAF,2LIZ,2OP9,2OZK,2RNK,2V6N,2VJ1,2XYQ,2XYR,2XYV,2Z3C,2Z3D,2Z3E,2Z94,2Z9G,2Z9J,2Z9K,2Z9L,2ZU4,2ZU5,3D62,3E91,3E9S,3EA7,3EA8,3EBN,3IWM,3M3V,3MJ5,3R24,3SN8,3SNA,3SNB,3SNC,3SND,3SNE,3SZN…	Replicase polyprotein 1ab	R1AB_CVHSA	P0C6X7	P59641,Q6WGN0,Q7T697,Q808C0,Q80BV7,Q80BV8,Q80E51
19529	CCOC(=O)c1cnc(SCC(=O)Nc2ccc(cc2)[N+]([O-])=O)nc1N	InChI=1S/C15H15N5O5S/c1-2-25-14(22)11-7-17-15(19-13(11)16)26-8-12(21)18-9-3-5-10(6-4-9)20(23)24/h3-7H,2,8H2,1H3,(H,18,21)(H2,16,17,19)	UOLRFSMMZCPIDL-UHFFFAOYSA-N	11284	ethyl 4-amino-2-({[(4-nitrophenyl)carbamoyl]methyl}sulfanyl)pyrimidine-5-carboxylate::pyrimidine-containing compound 21	3C-like proteinase (3CL-PRO)	Human SARS coronavirus		250000							Curated from the literature by BindingDB	10.1021/jm050852f	16759091			Tsai, KC; Chen, SY; Liang, PH; Lu, IL; Mahindroo, N; Hsieh, HP; Chao, YS; Liu, L; Liu, D; Lien, W; Lin, TH; Wu, SY	National Tsing Hua University	http://www.bindingdb.org/bind/chemsearch/marvin/MolStructure.jsp?monomerid=11284	http://www.bindingdb.org/jsp/dbsearch/PrimarySearch_ki.jsp?energyterm=kJ/mole&tag=pol&polymerid=4753&target=3C-like+proteinase+%283CL-PRO%29&column=ki&startPg=0&Increment=50&submit=Search	http://www.bindingdb.org/jsp/dbsearch/PrimarySearch_ki.jsp?energyterm=kJ/mole&tag=r21&monomerid=11284&enzyme=3C-like+proteinase+%283CL-PRO%29&column=ki&startPg=0&Increment=50&submit=Search			2810524	46511831					C02125	ZINC08618207	1	MESLVLGVNEKTHVQLSLPVLQVRDVLVRGFGDSVEEALSEAREHLKNGTCGLVELEKGVLPQLEQPYVFIKRSDALSTNHGHKVVELVAEMDGIQYGRSGITLGVLVPHVGETPIAYRNVLLRKNGNKGAGGHSYGIDLKSYDLGDELGTDPIEDYEQNWNTKHGSGALRELTRELNGGAVTRYVDNNFCGPDGYPLDCIKDFLARAGKSMCTLSEQLDYIESKRGVYCCRDHEHEIAWFTERSDKSYEHQTPFEIKSAKKFDTFKGECPKFVFPLNSKVKVIQPRVEKKKTEGFMGRIRSVYPVASPQECNNMHLSTLMKCNHCDEVSWQTCDFLKATCEHCGTENLVIEGPTTCGYLPTNAVVKMPCPACQDPEIGPEHSVADYHNHSNIETRLRK…	1Q2W,1QZ8,1UJ1,1UK2,1UK3,1UK4,1UW7,1WOF,1Z1I,2A5A,2A5I,2A5K,2ACF,2AHM,2ALV,2AMD,2AMQ,2BX3,2BX4,2C3S,2D2D,2DUC,2FAV,2FE8,2FYG,2G9T,2GA6,2GDT,2GRI,2GT7,2GT8,2GTB,2GX4,2GZ7,2GZ8,2GZ9,2H2Z,2HOB,2HSX,2IDY,2JZF,2K7X,2K87,2KAF,2LIZ,2OP9,2OZK,2RNK,2V6N,2VJ1,2XYQ,2XYR,2XYV,2Z3C,2Z3D,2Z3E,2Z94,2Z9G,2Z9J,2Z9K,2Z9L,2ZU4,2ZU5,3D62,3E91,3E9S,3EA7,3EA8,3EBN,3IWM,3M3V,3MJ5,3R24,3SN8,3SNA,3SNB,3SNC,3SND,3SNE,3SZN…	Replicase polyprotein 1ab	R1AB_CVHSA	P0C6X7	P59641,Q6WGN0,Q7T697,Q808C0,Q80BV7,Q80BV8,Q80E51
19530	CCOc1ccc(cc1)-n1c(O)cc(Sc2nc(C)cc(C)n2)c1O	InChI=1S/C18H19N3O3S/c1-4-24-14-7-5-13(6-8-14)21-16(22)10-15(17(21)23)25-18-19-11(2)9-12(3)20-18/h5-10,22-23H,4H2,1-3H3	RMGUDEJOXAUCMU-UHFFFAOYSA-N	11285	3-[(4,6-dimethylpyrimidin-2-yl)sulfanyl]-1-(4-ethoxyphenyl)pyrrolidine-2,5-dione::pyrimidine-containing compound 22	3C-like proteinase (3CL-PRO)	Human SARS coronavirus		300000							Curated from the literature by BindingDB	10.1021/jm050852f	16759091			Tsai, KC; Chen, SY; Liang, PH; Lu, IL; Mahindroo, N; Hsieh, HP; Chao, YS; Liu, L; Liu, D; Lien, W; Lin, TH; Wu, SY	National Tsing Hua University	http://www.bindingdb.org/bind/chemsearch/marvin/MolStructure.jsp?monomerid=11285	http://www.bindingdb.org/jsp/dbsearch/PrimarySearch_ki.jsp?energyterm=kJ/mole&tag=pol&polymerid=4753&target=3C-like+proteinase+%283CL-PRO%29&column=ki&startPg=0&Increment=50&submit=Search	http://www.bindingdb.org/jsp/dbsearch/PrimarySearch_ki.jsp?energyterm=kJ/mole&tag=r21&monomerid=11285&enzyme=3C-like+proteinase+%283CL-PRO%29&column=ki&startPg=0&Increment=50&submit=Search			91895790	46511832						ZINC00921863	1	MESLVLGVNEKTHVQLSLPVLQVRDVLVRGFGDSVEEALSEAREHLKNGTCGLVELEKGVLPQLEQPYVFIKRSDALSTNHGHKVVELVAEMDGIQYGRSGITLGVLVPHVGETPIAYRNVLLRKNGNKGAGGHSYGIDLKSYDLGDELGTDPIEDYEQNWNTKHGSGALRELTRELNGGAVTRYVDNNFCGPDGYPLDCIKDFLARAGKSMCTLSEQLDYIESKRGVYCCRDHEHEIAWFTERSDKSYEHQTPFEIKSAKKFDTFKGECPKFVFPLNSKVKVIQPRVEKKKTEGFMGRIRSVYPVASPQECNNMHLSTLMKCNHCDEVSWQTCDFLKATCEHCGTENLVIEGPTTCGYLPTNAVVKMPCPACQDPEIGPEHSVADYHNHSNIETRLRK…	1Q2W,1QZ8,1UJ1,1UK2,1UK3,1UK4,1UW7,1WOF,1Z1I,2A5A,2A5I,2A5K,2ACF,2AHM,2ALV,2AMD,2AMQ,2BX3,2BX4,2C3S,2D2D,2DUC,2FAV,2FE8,2FYG,2G9T,2GA6,2GDT,2GRI,2GT7,2GT8,2GTB,2GX4,2GZ7,2GZ8,2GZ9,2H2Z,2HOB,2HSX,2IDY,2JZF,2K7X,2K87,2KAF,2LIZ,2OP9,2OZK,2RNK,2V6N,2VJ1,2XYQ,2XYR,2XYV,2Z3C,2Z3D,2Z3E,2Z94,2Z9G,2Z9J,2Z9K,2Z9L,2ZU4,2ZU5,3D62,3E91,3E9S,3EA7,3EA8,3EBN,3IWM,3M3V,3MJ5,3R24,3SN8,3SNA,3SNB,3SNC,3SND,3SNE,3SZN…	Replicase polyprotein 1ab	R1AB_CVHSA	P0C6X7	P59641,Q6WGN0,Q7T697,Q808C0,Q80BV7,Q80BV8,Q80E51
19531	COc1cccc(c1)-c1nc(SCC(=O)Nc2ccc(cc2)[N+]([O-])=O)[nH]c(=O)c1C#N	InChI=1S/C20H15N5O5S/c1-30-15-4-2-3-12(9-15)18-16(10-21)19(27)24-20(23-18)31-11-17(26)22-13-5-7-14(8-6-13)25(28)29/h2-9H,11H2,1H3,(H,22,26)(H,23,24,27)	VZQGOJYNWVCAKC-UHFFFAOYSA-N	11286	2-{[5-cyano-4-(3-methoxyphenyl)-6-oxo-1,6-dihydropyrimidin-2-yl]sulfanyl}-N-(4-nitrophenyl)acetamide::pyrimidinone-containing compound 23	3C-like proteinase (3CL-PRO)	Human SARS coronavirus		300000							Curated from the literature by BindingDB	10.1021/jm050852f	16759091			Tsai, KC; Chen, SY; Liang, PH; Lu, IL; Mahindroo, N; Hsieh, HP; Chao, YS; Liu, L; Liu, D; Lien, W; Lin, TH; Wu, SY	National Tsing Hua University	http://www.bindingdb.org/bind/chemsearch/marvin/MolStructure.jsp?monomerid=11286	http://www.bindingdb.org/jsp/dbsearch/PrimarySearch_ki.jsp?energyterm=kJ/mole&tag=pol&polymerid=4753&target=3C-like+proteinase+%283CL-PRO%29&column=ki&startPg=0&Increment=50&submit=Search	http://www.bindingdb.org/jsp/dbsearch/PrimarySearch_ki.jsp?energyterm=kJ/mole&tag=r21&monomerid=11286&enzyme=3C-like+proteinase+%283CL-PRO%29&column=ki&startPg=0&Increment=50&submit=Search			2918926	46511833					C02125	ZINC09833493	1	MESLVLGVNEKTHVQLSLPVLQVRDVLVRGFGDSVEEALSEAREHLKNGTCGLVELEKGVLPQLEQPYVFIKRSDALSTNHGHKVVELVAEMDGIQYGRSGITLGVLVPHVGETPIAYRNVLLRKNGNKGAGGHSYGIDLKSYDLGDELGTDPIEDYEQNWNTKHGSGALRELTRELNGGAVTRYVDNNFCGPDGYPLDCIKDFLARAGKSMCTLSEQLDYIESKRGVYCCRDHEHEIAWFTERSDKSYEHQTPFEIKSAKKFDTFKGECPKFVFPLNSKVKVIQPRVEKKKTEGFMGRIRSVYPVASPQECNNMHLSTLMKCNHCDEVSWQTCDFLKATCEHCGTENLVIEGPTTCGYLPTNAVVKMPCPACQDPEIGPEHSVADYHNHSNIETRLRK…	1Q2W,1QZ8,1UJ1,1UK2,1UK3,1UK4,1UW7,1WOF,1Z1I,2A5A,2A5I,2A5K,2ACF,2AHM,2ALV,2AMD,2AMQ,2BX3,2BX4,2C3S,2D2D,2DUC,2FAV,2FE8,2FYG,2G9T,2GA6,2GDT,2GRI,2GT7,2GT8,2GTB,2GX4,2GZ7,2GZ8,2GZ9,2H2Z,2HOB,2HSX,2IDY,2JZF,2K7X,2K87,2KAF,2LIZ,2OP9,2OZK,2RNK,2V6N,2VJ1,2XYQ,2XYR,2XYV,2Z3C,2Z3D,2Z3E,2Z94,2Z9G,2Z9J,2Z9K,2Z9L,2ZU4,2ZU5,3D62,3E91,3E9S,3EA7,3EA8,3EBN,3IWM,3M3V,3MJ5,3R24,3SN8,3SNA,3SNB,3SNC,3SND,3SNE,3SZN…	Replicase polyprotein 1ab	R1AB_CVHSA	P0C6X7	P59641,Q6WGN0,Q7T697,Q808C0,Q80BV7,Q80BV8,Q80E51
19532	CC(Sc1nc(-c2ccccc2)c(C#N)c(=O)[nH]1)C(=O)Nc1ccc(Cl)cc1	InChI=1/C20H15ClN4O2S/c1-12(18(26)23-15-9-7-14(21)8-10-15)28-20-24-17(13-5-3-2-4-6-13)16(11-22)19(27)25-20/h2-10,12H,1H3,(H,23,26)(H,24,25,27)	DGNRVGPZXZKQQS-UHFFFAOYNA-N	11287	N-(4-chlorophenyl)-2-[(5-cyano-6-oxo-4-phenyl-1,6-dihydropyrimidin-2-yl)sulfanyl]propanamide::pyrimidinone-containing compound 24	3C-like proteinase (3CL-PRO)	Human SARS coronavirus		300000							Curated from the literature by BindingDB	10.1021/jm050852f	16759091			Tsai, KC; Chen, SY; Liang, PH; Lu, IL; Mahindroo, N; Hsieh, HP; Chao, YS; Liu, L; Liu, D; Lien, W; Lin, TH; Wu, SY	National Tsing Hua University	http://www.bindingdb.org/bind/chemsearch/marvin/MolStructure.jsp?monomerid=11287	http://www.bindingdb.org/jsp/dbsearch/PrimarySearch_ki.jsp?energyterm=kJ/mole&tag=pol&polymerid=4753&target=3C-like+proteinase+%283CL-PRO%29&column=ki&startPg=0&Increment=50&submit=Search	http://www.bindingdb.org/jsp/dbsearch/PrimarySearch_ki.jsp?energyterm=kJ/mole&tag=r21&monomerid=11287&enzyme=3C-like+proteinase+%283CL-PRO%29&column=ki&startPg=0&Increment=50&submit=Search			2946678	46511834						ZINC02751023	1	MESLVLGVNEKTHVQLSLPVLQVRDVLVRGFGDSVEEALSEAREHLKNGTCGLVELEKGVLPQLEQPYVFIKRSDALSTNHGHKVVELVAEMDGIQYGRSGITLGVLVPHVGETPIAYRNVLLRKNGNKGAGGHSYGIDLKSYDLGDELGTDPIEDYEQNWNTKHGSGALRELTRELNGGAVTRYVDNNFCGPDGYPLDCIKDFLARAGKSMCTLSEQLDYIESKRGVYCCRDHEHEIAWFTERSDKSYEHQTPFEIKSAKKFDTFKGECPKFVFPLNSKVKVIQPRVEKKKTEGFMGRIRSVYPVASPQECNNMHLSTLMKCNHCDEVSWQTCDFLKATCEHCGTENLVIEGPTTCGYLPTNAVVKMPCPACQDPEIGPEHSVADYHNHSNIETRLRK…	1Q2W,1QZ8,1UJ1,1UK2,1UK3,1UK4,1UW7,1WOF,1Z1I,2A5A,2A5I,2A5K,2ACF,2AHM,2ALV,2AMD,2AMQ,2BX3,2BX4,2C3S,2D2D,2DUC,2FAV,2FE8,2FYG,2G9T,2GA6,2GDT,2GRI,2GT7,2GT8,2GTB,2GX4,2GZ7,2GZ8,2GZ9,2H2Z,2HOB,2HSX,2IDY,2JZF,2K7X,2K87,2KAF,2LIZ,2OP9,2OZK,2RNK,2V6N,2VJ1,2XYQ,2XYR,2XYV,2Z3C,2Z3D,2Z3E,2Z94,2Z9G,2Z9J,2Z9K,2Z9L,2ZU4,2ZU5,3D62,3E91,3E9S,3EA7,3EA8,3EBN,3IWM,3M3V,3MJ5,3R24,3SN8,3SNA,3SNB,3SNC,3SND,3SNE,3SZN…	Replicase polyprotein 1ab	R1AB_CVHSA	P0C6X7	P59641,Q6WGN0,Q7T697,Q808C0,Q80BV7,Q80BV8,Q80E51
19533	CC(C)(C)c1ccc(NC(=O)CSc2nc(C3CCCCC3)c(C#N)c(=O)[nH]2)cc1	InChI=1S/C23H28N4O2S/c1-23(2,3)16-9-11-17(12-10-16)25-19(28)14-30-22-26-20(15-7-5-4-6-8-15)18(13-24)21(29)27-22/h9-12,15H,4-8,14H2,1-3H3,(H,25,28)(H,26,27,29)	OLHLKONSFGSLGT-UHFFFAOYSA-N	11288	N-(4-tert-butylphenyl)-2-[(5-cyano-4-cyclohexyl-6-oxo-1,6-dihydropyrimidin-2-yl)sulfanyl]acetamide::pyrimidinone-containing compound 25	3C-like proteinase (3CL-PRO)	Human SARS coronavirus		350000							Curated from the literature by BindingDB	10.1021/jm050852f	16759091			Tsai, KC; Chen, SY; Liang, PH; Lu, IL; Mahindroo, N; Hsieh, HP; Chao, YS; Liu, L; Liu, D; Lien, W; Lin, TH; Wu, SY	National Tsing Hua University	http://www.bindingdb.org/bind/chemsearch/marvin/MolStructure.jsp?monomerid=11288	http://www.bindingdb.org/jsp/dbsearch/PrimarySearch_ki.jsp?energyterm=kJ/mole&tag=pol&polymerid=4753&target=3C-like+proteinase+%283CL-PRO%29&column=ki&startPg=0&Increment=50&submit=Search	http://www.bindingdb.org/jsp/dbsearch/PrimarySearch_ki.jsp?energyterm=kJ/mole&tag=r21&monomerid=11288&enzyme=3C-like+proteinase+%283CL-PRO%29&column=ki&startPg=0&Increment=50&submit=Search			2727994	46511835						ZINC01043294	1	MESLVLGVNEKTHVQLSLPVLQVRDVLVRGFGDSVEEALSEAREHLKNGTCGLVELEKGVLPQLEQPYVFIKRSDALSTNHGHKVVELVAEMDGIQYGRSGITLGVLVPHVGETPIAYRNVLLRKNGNKGAGGHSYGIDLKSYDLGDELGTDPIEDYEQNWNTKHGSGALRELTRELNGGAVTRYVDNNFCGPDGYPLDCIKDFLARAGKSMCTLSEQLDYIESKRGVYCCRDHEHEIAWFTERSDKSYEHQTPFEIKSAKKFDTFKGECPKFVFPLNSKVKVIQPRVEKKKTEGFMGRIRSVYPVASPQECNNMHLSTLMKCNHCDEVSWQTCDFLKATCEHCGTENLVIEGPTTCGYLPTNAVVKMPCPACQDPEIGPEHSVADYHNHSNIETRLRK…	1Q2W,1QZ8,1UJ1,1UK2,1UK3,1UK4,1UW7,1WOF,1Z1I,2A5A,2A5I,2A5K,2ACF,2AHM,2ALV,2AMD,2AMQ,2BX3,2BX4,2C3S,2D2D,2DUC,2FAV,2FE8,2FYG,2G9T,2GA6,2GDT,2GRI,2GT7,2GT8,2GTB,2GX4,2GZ7,2GZ8,2GZ9,2H2Z,2HOB,2HSX,2IDY,2JZF,2K7X,2K87,2KAF,2LIZ,2OP9,2OZK,2RNK,2V6N,2VJ1,2XYQ,2XYR,2XYV,2Z3C,2Z3D,2Z3E,2Z94,2Z9G,2Z9J,2Z9K,2Z9L,2ZU4,2ZU5,3D62,3E91,3E9S,3EA7,3EA8,3EBN,3IWM,3M3V,3MJ5,3R24,3SN8,3SNA,3SNB,3SNC,3SND,3SNE,3SZN…	Replicase polyprotein 1ab	R1AB_CVHSA	P0C6X7	P59641,Q6WGN0,Q7T697,Q808C0,Q80BV7,Q80BV8,Q80E51
19534	COc1ccc(cc1)-c1ccnc(SCC(=O)Nc2ccc(cc2)C(C)C)n1	InChI=1S/C22H23N3O2S/c1-15(2)16-4-8-18(9-5-16)24-21(26)14-28-22-23-13-12-20(25-22)17-6-10-19(27-3)11-7-17/h4-13,15H,14H2,1-3H3,(H,24,26)	CJBZKDWWJIGHRP-UHFFFAOYSA-N	11289	2-{[4-(4-methoxyphenyl)pyrimidin-2-yl]sulfanyl}-N-[4-(propan-2-yl)phenyl]acetamide::pyrimidine-containing compound 26	3C-like proteinase (3CL-PRO)	Human SARS coronavirus		400000							Curated from the literature by BindingDB	10.1021/jm050852f	16759091			Tsai, KC; Chen, SY; Liang, PH; Lu, IL; Mahindroo, N; Hsieh, HP; Chao, YS; Liu, L; Liu, D; Lien, W; Lin, TH; Wu, SY	National Tsing Hua University	http://www.bindingdb.org/bind/chemsearch/marvin/MolStructure.jsp?monomerid=11289	http://www.bindingdb.org/jsp/dbsearch/PrimarySearch_ki.jsp?energyterm=kJ/mole&tag=pol&polymerid=4753&target=3C-like+proteinase+%283CL-PRO%29&column=ki&startPg=0&Increment=50&submit=Search	http://www.bindingdb.org/jsp/dbsearch/PrimarySearch_ki.jsp?energyterm=kJ/mole&tag=r21&monomerid=11289&enzyme=3C-like+proteinase+%283CL-PRO%29&column=ki&startPg=0&Increment=50&submit=Search			2823615	46511836						ZINC01040329	1	MESLVLGVNEKTHVQLSLPVLQVRDVLVRGFGDSVEEALSEAREHLKNGTCGLVELEKGVLPQLEQPYVFIKRSDALSTNHGHKVVELVAEMDGIQYGRSGITLGVLVPHVGETPIAYRNVLLRKNGNKGAGGHSYGIDLKSYDLGDELGTDPIEDYEQNWNTKHGSGALRELTRELNGGAVTRYVDNNFCGPDGYPLDCIKDFLARAGKSMCTLSEQLDYIESKRGVYCCRDHEHEIAWFTERSDKSYEHQTPFEIKSAKKFDTFKGECPKFVFPLNSKVKVIQPRVEKKKTEGFMGRIRSVYPVASPQECNNMHLSTLMKCNHCDEVSWQTCDFLKATCEHCGTENLVIEGPTTCGYLPTNAVVKMPCPACQDPEIGPEHSVADYHNHSNIETRLRK…	1Q2W,1QZ8,1UJ1,1UK2,1UK3,1UK4,1UW7,1WOF,1Z1I,2A5A,2A5I,2A5K,2ACF,2AHM,2ALV,2AMD,2AMQ,2BX3,2BX4,2C3S,2D2D,2DUC,2FAV,2FE8,2FYG,2G9T,2GA6,2GDT,2GRI,2GT7,2GT8,2GTB,2GX4,2GZ7,2GZ8,2GZ9,2H2Z,2HOB,2HSX,2IDY,2JZF,2K7X,2K87,2KAF,2LIZ,2OP9,2OZK,2RNK,2V6N,2VJ1,2XYQ,2XYR,2XYV,2Z3C,2Z3D,2Z3E,2Z94,2Z9G,2Z9J,2Z9K,2Z9L,2ZU4,2ZU5,3D62,3E91,3E9S,3EA7,3EA8,3EBN,3IWM,3M3V,3MJ5,3R24,3SN8,3SNA,3SNB,3SNC,3SND,3SNE,3SZN…	Replicase polyprotein 1ab	R1AB_CVHSA	P0C6X7	P59641,Q6WGN0,Q7T697,Q808C0,Q80BV7,Q80BV8,Q80E51
19535	Cc1cc(nc(SCC(=O)Nc2ccc(Cl)cc2F)n1)C(F)(F)F	InChI=1S/C14H10ClF4N3OS/c1-7-4-11(14(17,18)19)22-13(20-7)24-6-12(23)21-10-3-2-8(15)5-9(10)16/h2-5H,6H2,1H3,(H,21,23)	HYEIKCOUEGKGTH-UHFFFAOYSA-N	11290	N-(4-chloro-2-fluorophenyl)-2-{[4-methyl-6-(trifluoromethyl)pyrimidin-2-yl]sulfanyl}acetamide::pyrimidine-containing compound 27	3C-like proteinase (3CL-PRO)	Human SARS coronavirus		500000							Curated from the literature by BindingDB	10.1021/jm050852f	16759091			Tsai, KC; Chen, SY; Liang, PH; Lu, IL; Mahindroo, N; Hsieh, HP; Chao, YS; Liu, L; Liu, D; Lien, W; Lin, TH; Wu, SY	National Tsing Hua University	http://www.bindingdb.org/bind/chemsearch/marvin/MolStructure.jsp?monomerid=11290	http://www.bindingdb.org/jsp/dbsearch/PrimarySearch_ki.jsp?energyterm=kJ/mole&tag=pol&polymerid=4753&target=3C-like+proteinase+%283CL-PRO%29&column=ki&startPg=0&Increment=50&submit=Search	http://www.bindingdb.org/jsp/dbsearch/PrimarySearch_ki.jsp?energyterm=kJ/mole&tag=r21&monomerid=11290&enzyme=3C-like+proteinase+%283CL-PRO%29&column=ki&startPg=0&Increment=50&submit=Search			1342108	46511837						ZINC01177741	1	MESLVLGVNEKTHVQLSLPVLQVRDVLVRGFGDSVEEALSEAREHLKNGTCGLVELEKGVLPQLEQPYVFIKRSDALSTNHGHKVVELVAEMDGIQYGRSGITLGVLVPHVGETPIAYRNVLLRKNGNKGAGGHSYGIDLKSYDLGDELGTDPIEDYEQNWNTKHGSGALRELTRELNGGAVTRYVDNNFCGPDGYPLDCIKDFLARAGKSMCTLSEQLDYIESKRGVYCCRDHEHEIAWFTERSDKSYEHQTPFEIKSAKKFDTFKGECPKFVFPLNSKVKVIQPRVEKKKTEGFMGRIRSVYPVASPQECNNMHLSTLMKCNHCDEVSWQTCDFLKATCEHCGTENLVIEGPTTCGYLPTNAVVKMPCPACQDPEIGPEHSVADYHNHSNIETRLRK…	1Q2W,1QZ8,1UJ1,1UK2,1UK3,1UK4,1UW7,1WOF,1Z1I,2A5A,2A5I,2A5K,2ACF,2AHM,2ALV,2AMD,2AMQ,2BX3,2BX4,2C3S,2D2D,2DUC,2FAV,2FE8,2FYG,2G9T,2GA6,2GDT,2GRI,2GT7,2GT8,2GTB,2GX4,2GZ7,2GZ8,2GZ9,2H2Z,2HOB,2HSX,2IDY,2JZF,2K7X,2K87,2KAF,2LIZ,2OP9,2OZK,2RNK,2V6N,2VJ1,2XYQ,2XYR,2XYV,2Z3C,2Z3D,2Z3E,2Z94,2Z9G,2Z9J,2Z9K,2Z9L,2ZU4,2ZU5,3D62,3E91,3E9S,3EA7,3EA8,3EBN,3IWM,3M3V,3MJ5,3R24,3SN8,3SNA,3SNB,3SNC,3SND,3SNE,3SZN…	Replicase polyprotein 1ab	R1AB_CVHSA	P0C6X7	P59641,Q6WGN0,Q7T697,Q808C0,Q80BV7,Q80BV8,Q80E51
19536	Cc1nc(SCC(=O)Nc2ccc(cc2)[N+]([O-])=O)[n-]c(=[OH+])c1C	InChI=1S/C14H14N4O4S/c1-8-9(2)15-14(17-13(8)20)23-7-12(19)16-10-3-5-11(6-4-10)18(21)22/h3-6H,7H2,1-2H3,(H2,15,16,17,19,20)	LSSIOYMBCDLTDA-UHFFFAOYSA-N	11291	2-[(4-hydroxy-5,6-dimethylpyrimidin-2-yl)sulfanyl]-N-(4-nitrophenyl)acetamide::pyrimidine-containing compound 28	3C-like proteinase (3CL-PRO)	Human SARS coronavirus		>1000000							Curated from the literature by BindingDB	10.1021/jm050852f	16759091			Tsai, KC; Chen, SY; Liang, PH; Lu, IL; Mahindroo, N; Hsieh, HP; Chao, YS; Liu, L; Liu, D; Lien, W; Lin, TH; Wu, SY	National Tsing Hua University	http://www.bindingdb.org/bind/chemsearch/marvin/MolStructure.jsp?monomerid=11291	http://www.bindingdb.org/jsp/dbsearch/PrimarySearch_ki.jsp?energyterm=kJ/mole&tag=pol&polymerid=4753&target=3C-like+proteinase+%283CL-PRO%29&column=ki&startPg=0&Increment=50&submit=Search	http://www.bindingdb.org/jsp/dbsearch/PrimarySearch_ki.jsp?energyterm=kJ/mole&tag=r21&monomerid=11291&enzyme=3C-like+proteinase+%283CL-PRO%29&column=ki&startPg=0&Increment=50&submit=Search			2962669	46511838					C02125	ZINC14947942	1	MESLVLGVNEKTHVQLSLPVLQVRDVLVRGFGDSVEEALSEAREHLKNGTCGLVELEKGVLPQLEQPYVFIKRSDALSTNHGHKVVELVAEMDGIQYGRSGITLGVLVPHVGETPIAYRNVLLRKNGNKGAGGHSYGIDLKSYDLGDELGTDPIEDYEQNWNTKHGSGALRELTRELNGGAVTRYVDNNFCGPDGYPLDCIKDFLARAGKSMCTLSEQLDYIESKRGVYCCRDHEHEIAWFTERSDKSYEHQTPFEIKSAKKFDTFKGECPKFVFPLNSKVKVIQPRVEKKKTEGFMGRIRSVYPVASPQECNNMHLSTLMKCNHCDEVSWQTCDFLKATCEHCGTENLVIEGPTTCGYLPTNAVVKMPCPACQDPEIGPEHSVADYHNHSNIETRLRK…	1Q2W,1QZ8,1UJ1,1UK2,1UK3,1UK4,1UW7,1WOF,1Z1I,2A5A,2A5I,2A5K,2ACF,2AHM,2ALV,2AMD,2AMQ,2BX3,2BX4,2C3S,2D2D,2DUC,2FAV,2FE8,2FYG,2G9T,2GA6,2GDT,2GRI,2GT7,2GT8,2GTB,2GX4,2GZ7,2GZ8,2GZ9,2H2Z,2HOB,2HSX,2IDY,2JZF,2K7X,2K87,2KAF,2LIZ,2OP9,2OZK,2RNK,2V6N,2VJ1,2XYQ,2XYR,2XYV,2Z3C,2Z3D,2Z3E,2Z94,2Z9G,2Z9J,2Z9K,2Z9L,2ZU4,2ZU5,3D62,3E91,3E9S,3EA7,3EA8,3EBN,3IWM,3M3V,3MJ5,3R24,3SN8,3SNA,3SNB,3SNC,3SND,3SNE,3SZN…	Replicase polyprotein 1ab	R1AB_CVHSA	P0C6X7	P59641,Q6WGN0,Q7T697,Q808C0,Q80BV7,Q80BV8,Q80E51
19537	Cc1cc(c(Cl)cc1Cl)S(=O)(=O)c1c(cc(cc1[N+]([O-])=O)C(F)(F)F)[N+]([O-])=O	InChI=1S/C14H7Cl2F3N2O6S/c1-6-2-12(9(16)5-8(6)15)28(26,27)13-10(20(22)23)3-7(14(17,18)19)4-11(13)21(24)25/h2-5H,1H3	INAZPZCJNPPHGV-UHFFFAOYSA-N	11292	1,5-dichloro-2-{[2,6-dinitro-4-(trifluoromethyl)benzene]sulfonyl}-4-methylbenzene::Compound 1 analog 3	3C-like proteinase (3CL-PRO)	Human SARS coronavirus		300					7	25.00 C	Curated from the literature by BindingDB	10.1021/jm060207o	16913704			Lu, IL; Mahindroo, N; Liang, PH; Peng, YH; Kuo, CJ; Tsai, KC; Hsieh, HP; Chao, YS; Wu, SY	National Defense Medical Center	http://www.bindingdb.org/bind/chemsearch/marvin/MolStructure.jsp?monomerid=11292	http://www.bindingdb.org/jsp/dbsearch/PrimarySearch_ki.jsp?energyterm=kJ/mole&tag=pol&polymerid=4753&target=3C-like+proteinase+%283CL-PRO%29&column=ki&startPg=0&Increment=50&submit=Search	http://www.bindingdb.org/jsp/dbsearch/PrimarySearch_ki.jsp?energyterm=kJ/mole&tag=r21&monomerid=11292&enzyme=3C-like+proteinase+%283CL-PRO%29&column=ki&startPg=0&Increment=50&submit=Search	D3F	2GZ7	2799606	46511839			DB07620			ZINC08626709	1	MESLVLGVNEKTHVQLSLPVLQVRDVLVRGFGDSVEEALSEAREHLKNGTCGLVELEKGVLPQLEQPYVFIKRSDALSTNHGHKVVELVAEMDGIQYGRSGITLGVLVPHVGETPIAYRNVLLRKNGNKGAGGHSYGIDLKSYDLGDELGTDPIEDYEQNWNTKHGSGALRELTRELNGGAVTRYVDNNFCGPDGYPLDCIKDFLARAGKSMCTLSEQLDYIESKRGVYCCRDHEHEIAWFTERSDKSYEHQTPFEIKSAKKFDTFKGECPKFVFPLNSKVKVIQPRVEKKKTEGFMGRIRSVYPVASPQECNNMHLSTLMKCNHCDEVSWQTCDFLKATCEHCGTENLVIEGPTTCGYLPTNAVVKMPCPACQDPEIGPEHSVADYHNHSNIETRLRK…	1Q2W,1QZ8,1UJ1,1UK2,1UK3,1UK4,1UW7,1WOF,1Z1I,2A5A,2A5I,2A5K,2ACF,2AHM,2ALV,2AMD,2AMQ,2BX3,2BX4,2C3S,2D2D,2DUC,2FAV,2FE8,2FYG,2G9T,2GA6,2GDT,2GRI,2GT7,2GT8,2GTB,2GX4,2GZ7,2GZ8,2GZ9,2H2Z,2HOB,2HSX,2IDY,2JZF,2K7X,2K87,2KAF,2LIZ,2OP9,2OZK,2RNK,2V6N,2VJ1,2XYQ,2XYR,2XYV,2Z3C,2Z3D,2Z3E,2Z94,2Z9G,2Z9J,2Z9K,2Z9L,2ZU4,2ZU5,3D62,3E91,3E9S,3EA7,3EA8,3EBN,3IWM,3M3V,3MJ5,3R24,3SN8,3SNA,3SNB,3SNC,3SND,3SNE,3SZN…	Replicase polyprotein 1ab	R1AB_CVHSA	P0C6X7	P59641,Q6WGN0,Q7T697,Q808C0,Q80BV7,Q80BV8,Q80E51
19538	ClC(Cl)=C(Cl)C(=O)Oc1ccc(cc1)S(=O)(=O)c1ccc(OC(=O)C(Cl)=C(Cl)Cl)cc1	InChI=1S/C18H8Cl6O6S/c19-13(15(21)22)17(25)29-9-1-5-11(6-2-9)31(27,28)12-7-3-10(4-8-12)30-18(26)14(20)16(23)24/h1-8H	HXYPMMAPDRFFTM-UHFFFAOYSA-N	11293	4-({4-[(2,3,3-trichloroprop-2-enoyl)oxy]benzene}sulfonyl)phenyl 2,3,3-trichloroprop-2-enoate::Compound 1 analog 4	3C-like proteinase (3CL-PRO)	Human SARS coronavirus		900					7	25.00 C	Curated from the literature by BindingDB	10.1021/jm060207o	16913704			Lu, IL; Mahindroo, N; Liang, PH; Peng, YH; Kuo, CJ; Tsai, KC; Hsieh, HP; Chao, YS; Wu, SY	National Defense Medical Center	http://www.bindingdb.org/bind/chemsearch/marvin/MolStructure.jsp?monomerid=11293	http://www.bindingdb.org/jsp/dbsearch/PrimarySearch_ki.jsp?energyterm=kJ/mole&tag=pol&polymerid=4753&target=3C-like+proteinase+%283CL-PRO%29&column=ki&startPg=0&Increment=50&submit=Search	http://www.bindingdb.org/jsp/dbsearch/PrimarySearch_ki.jsp?energyterm=kJ/mole&tag=r21&monomerid=11293&enzyme=3C-like+proteinase+%283CL-PRO%29&column=ki&startPg=0&Increment=50&submit=Search			2774892	46511840	51689					ZINC02155429	1	MESLVLGVNEKTHVQLSLPVLQVRDVLVRGFGDSVEEALSEAREHLKNGTCGLVELEKGVLPQLEQPYVFIKRSDALSTNHGHKVVELVAEMDGIQYGRSGITLGVLVPHVGETPIAYRNVLLRKNGNKGAGGHSYGIDLKSYDLGDELGTDPIEDYEQNWNTKHGSGALRELTRELNGGAVTRYVDNNFCGPDGYPLDCIKDFLARAGKSMCTLSEQLDYIESKRGVYCCRDHEHEIAWFTERSDKSYEHQTPFEIKSAKKFDTFKGECPKFVFPLNSKVKVIQPRVEKKKTEGFMGRIRSVYPVASPQECNNMHLSTLMKCNHCDEVSWQTCDFLKATCEHCGTENLVIEGPTTCGYLPTNAVVKMPCPACQDPEIGPEHSVADYHNHSNIETRLRK…	1Q2W,1QZ8,1UJ1,1UK2,1UK3,1UK4,1UW7,1WOF,1Z1I,2A5A,2A5I,2A5K,2ACF,2AHM,2ALV,2AMD,2AMQ,2BX3,2BX4,2C3S,2D2D,2DUC,2FAV,2FE8,2FYG,2G9T,2GA6,2GDT,2GRI,2GT7,2GT8,2GTB,2GX4,2GZ7,2GZ8,2GZ9,2H2Z,2HOB,2HSX,2IDY,2JZF,2K7X,2K87,2KAF,2LIZ,2OP9,2OZK,2RNK,2V6N,2VJ1,2XYQ,2XYR,2XYV,2Z3C,2Z3D,2Z3E,2Z94,2Z9G,2Z9J,2Z9K,2Z9L,2ZU4,2ZU5,3D62,3E91,3E9S,3EA7,3EA8,3EBN,3IWM,3M3V,3MJ5,3R24,3SN8,3SNA,3SNB,3SNC,3SND,3SNE,3SZN…	Replicase polyprotein 1ab	R1AB_CVHSA	P0C6X7	P59641,Q6WGN0,Q7T697,Q808C0,Q80BV7,Q80BV8,Q80E51
19539	Nc1ncc(c(N)n1)S(=O)(=O)c1ccc(Cl)cc1	InChI=1S/C10H9ClN4O2S/c11-6-1-3-7(4-2-6)18(16,17)8-5-14-10(13)15-9(8)12/h1-5H,(H4,12,13,14,15)	RPPFHWBHHCJZJS-UHFFFAOYSA-N	11294	5-[(4-chlorobenzene)sulfonyl]pyrimidine-2,4-diamine::Compound 1 analog 5	3C-like proteinase (3CL-PRO)	Human SARS coronavirus		6000					7	25.00 C	Curated from the literature by BindingDB	10.1021/jm060207o	16913704			Lu, IL; Mahindroo, N; Liang, PH; Peng, YH; Kuo, CJ; Tsai, KC; Hsieh, HP; Chao, YS; Wu, SY	National Defense Medical Center	http://www.bindingdb.org/bind/chemsearch/marvin/MolStructure.jsp?monomerid=11294	http://www.bindingdb.org/jsp/dbsearch/PrimarySearch_ki.jsp?energyterm=kJ/mole&tag=pol&polymerid=4753&target=3C-like+proteinase+%283CL-PRO%29&column=ki&startPg=0&Increment=50&submit=Search	http://www.bindingdb.org/jsp/dbsearch/PrimarySearch_ki.jsp?energyterm=kJ/mole&tag=r21&monomerid=11294&enzyme=3C-like+proteinase+%283CL-PRO%29&column=ki&startPg=0&Increment=50&submit=Search			2819040	46511841						ZINC00165976	1	MESLVLGVNEKTHVQLSLPVLQVRDVLVRGFGDSVEEALSEAREHLKNGTCGLVELEKGVLPQLEQPYVFIKRSDALSTNHGHKVVELVAEMDGIQYGRSGITLGVLVPHVGETPIAYRNVLLRKNGNKGAGGHSYGIDLKSYDLGDELGTDPIEDYEQNWNTKHGSGALRELTRELNGGAVTRYVDNNFCGPDGYPLDCIKDFLARAGKSMCTLSEQLDYIESKRGVYCCRDHEHEIAWFTERSDKSYEHQTPFEIKSAKKFDTFKGECPKFVFPLNSKVKVIQPRVEKKKTEGFMGRIRSVYPVASPQECNNMHLSTLMKCNHCDEVSWQTCDFLKATCEHCGTENLVIEGPTTCGYLPTNAVVKMPCPACQDPEIGPEHSVADYHNHSNIETRLRK…	1Q2W,1QZ8,1UJ1,1UK2,1UK3,1UK4,1UW7,1WOF,1Z1I,2A5A,2A5I,2A5K,2ACF,2AHM,2ALV,2AMD,2AMQ,2BX3,2BX4,2C3S,2D2D,2DUC,2FAV,2FE8,2FYG,2G9T,2GA6,2GDT,2GRI,2GT7,2GT8,2GTB,2GX4,2GZ7,2GZ8,2GZ9,2H2Z,2HOB,2HSX,2IDY,2JZF,2K7X,2K87,2KAF,2LIZ,2OP9,2OZK,2RNK,2V6N,2VJ1,2XYQ,2XYR,2XYV,2Z3C,2Z3D,2Z3E,2Z94,2Z9G,2Z9J,2Z9K,2Z9L,2ZU4,2ZU5,3D62,3E91,3E9S,3EA7,3EA8,3EBN,3IWM,3M3V,3MJ5,3R24,3SN8,3SNA,3SNB,3SNC,3SND,3SNE,3SZN…	Replicase polyprotein 1ab	R1AB_CVHSA	P0C6X7	P59641,Q6WGN0,Q7T697,Q808C0,Q80BV7,Q80BV8,Q80E51
19540	[O-][N+](=O)c1cc(ccc1S(=O)(=O)c1ccc(Cl)cc1)C(F)(F)F	InChI=1S/C13H7ClF3NO4S/c14-9-2-4-10(5-3-9)23(21,22)12-6-1-8(13(15,16)17)7-11(12)18(19)20/h1-7H	ZNNXTHUWLFOGRX-UHFFFAOYSA-N	11295	1-[(4-chlorobenzene)sulfonyl]-2-nitro-4-(trifluoromethyl)benzene::Compound 1 analog 6	3C-like proteinase (3CL-PRO)	Human SARS coronavirus		12000					7	25.00 C	Curated from the literature by BindingDB	10.1021/jm060207o	16913704			Lu, IL; Mahindroo, N; Liang, PH; Peng, YH; Kuo, CJ; Tsai, KC; Hsieh, HP; Chao, YS; Wu, SY	National Defense Medical Center	http://www.bindingdb.org/bind/chemsearch/marvin/MolStructure.jsp?monomerid=11295	http://www.bindingdb.org/jsp/dbsearch/PrimarySearch_ki.jsp?energyterm=kJ/mole&tag=pol&polymerid=4753&target=3C-like+proteinase+%283CL-PRO%29&column=ki&startPg=0&Increment=50&submit=Search	http://www.bindingdb.org/jsp/dbsearch/PrimarySearch_ki.jsp?energyterm=kJ/mole&tag=r21&monomerid=11295&enzyme=3C-like+proteinase+%283CL-PRO%29&column=ki&startPg=0&Increment=50&submit=Search			2797358	46511842						ZINC01036244	1	MESLVLGVNEKTHVQLSLPVLQVRDVLVRGFGDSVEEALSEAREHLKNGTCGLVELEKGVLPQLEQPYVFIKRSDALSTNHGHKVVELVAEMDGIQYGRSGITLGVLVPHVGETPIAYRNVLLRKNGNKGAGGHSYGIDLKSYDLGDELGTDPIEDYEQNWNTKHGSGALRELTRELNGGAVTRYVDNNFCGPDGYPLDCIKDFLARAGKSMCTLSEQLDYIESKRGVYCCRDHEHEIAWFTERSDKSYEHQTPFEIKSAKKFDTFKGECPKFVFPLNSKVKVIQPRVEKKKTEGFMGRIRSVYPVASPQECNNMHLSTLMKCNHCDEVSWQTCDFLKATCEHCGTENLVIEGPTTCGYLPTNAVVKMPCPACQDPEIGPEHSVADYHNHSNIETRLRK…	1Q2W,1QZ8,1UJ1,1UK2,1UK3,1UK4,1UW7,1WOF,1Z1I,2A5A,2A5I,2A5K,2ACF,2AHM,2ALV,2AMD,2AMQ,2BX3,2BX4,2C3S,2D2D,2DUC,2FAV,2FE8,2FYG,2G9T,2GA6,2GDT,2GRI,2GT7,2GT8,2GTB,2GX4,2GZ7,2GZ8,2GZ9,2H2Z,2HOB,2HSX,2IDY,2JZF,2K7X,2K87,2KAF,2LIZ,2OP9,2OZK,2RNK,2V6N,2VJ1,2XYQ,2XYR,2XYV,2Z3C,2Z3D,2Z3E,2Z94,2Z9G,2Z9J,2Z9K,2Z9L,2ZU4,2ZU5,3D62,3E91,3E9S,3EA7,3EA8,3EBN,3IWM,3M3V,3MJ5,3R24,3SN8,3SNA,3SNB,3SNC,3SND,3SNE,3SZN…	Replicase polyprotein 1ab	R1AB_CVHSA	P0C6X7	P59641,Q6WGN0,Q7T697,Q808C0,Q80BV7,Q80BV8,Q80E51
19541	Cc1nc(c(C#N)c(C)c1[N+]([O-])=O)S(=O)(=O)c1ccccc1	InChI=1S/C14H11N3O4S/c1-9-12(8-15)14(16-10(2)13(9)17(18)19)22(20,21)11-6-4-3-5-7-11/h3-7H,1-2H3	JLRPBEAXLCQKGS-UHFFFAOYSA-N	11296	2-(benzenesulfonyl)-4,6-dimethyl-5-nitropyridine-3-carbonitrile::Compound 1 analog 7::cid_2726174	3C-like proteinase (3CL-PRO)	Human SARS coronavirus		13000					7	25.00 C	Curated from the literature by BindingDB	10.1021/jm060207o	16913704			Lu, IL; Mahindroo, N; Liang, PH; Peng, YH; Kuo, CJ; Tsai, KC; Hsieh, HP; Chao, YS; Wu, SY	National Defense Medical Center	http://www.bindingdb.org/bind/chemsearch/marvin/MolStructure.jsp?monomerid=11296	http://www.bindingdb.org/jsp/dbsearch/PrimarySearch_ki.jsp?energyterm=kJ/mole&tag=pol&polymerid=4753&target=3C-like+proteinase+%283CL-PRO%29&column=ki&startPg=0&Increment=50&submit=Search	http://www.bindingdb.org/jsp/dbsearch/PrimarySearch_ki.jsp?energyterm=kJ/mole&tag=r21&monomerid=11296&enzyme=3C-like+proteinase+%283CL-PRO%29&column=ki&startPg=0&Increment=50&submit=Search			2726174	46511843						ZINC00075465	1	MESLVLGVNEKTHVQLSLPVLQVRDVLVRGFGDSVEEALSEAREHLKNGTCGLVELEKGVLPQLEQPYVFIKRSDALSTNHGHKVVELVAEMDGIQYGRSGITLGVLVPHVGETPIAYRNVLLRKNGNKGAGGHSYGIDLKSYDLGDELGTDPIEDYEQNWNTKHGSGALRELTRELNGGAVTRYVDNNFCGPDGYPLDCIKDFLARAGKSMCTLSEQLDYIESKRGVYCCRDHEHEIAWFTERSDKSYEHQTPFEIKSAKKFDTFKGECPKFVFPLNSKVKVIQPRVEKKKTEGFMGRIRSVYPVASPQECNNMHLSTLMKCNHCDEVSWQTCDFLKATCEHCGTENLVIEGPTTCGYLPTNAVVKMPCPACQDPEIGPEHSVADYHNHSNIETRLRK…	1Q2W,1QZ8,1UJ1,1UK2,1UK3,1UK4,1UW7,1WOF,1Z1I,2A5A,2A5I,2A5K,2ACF,2AHM,2ALV,2AMD,2AMQ,2BX3,2BX4,2C3S,2D2D,2DUC,2FAV,2FE8,2FYG,2G9T,2GA6,2GDT,2GRI,2GT7,2GT8,2GTB,2GX4,2GZ7,2GZ8,2GZ9,2H2Z,2HOB,2HSX,2IDY,2JZF,2K7X,2K87,2KAF,2LIZ,2OP9,2OZK,2RNK,2V6N,2VJ1,2XYQ,2XYR,2XYV,2Z3C,2Z3D,2Z3E,2Z94,2Z9G,2Z9J,2Z9K,2Z9L,2ZU4,2ZU5,3D62,3E91,3E9S,3EA7,3EA8,3EBN,3IWM,3M3V,3MJ5,3R24,3SN8,3SNA,3SNB,3SNC,3SND,3SNE,3SZN…	Replicase polyprotein 1ab	R1AB_CVHSA	P0C6X7	P59641,Q6WGN0,Q7T697,Q808C0,Q80BV7,Q80BV8,Q80E51
19542	Cc1ccc(cc1)S(=O)(=O)c1nc(C)c(c(C)c1C#N)[N+]([O-])=O	InChI=1S/C15H13N3O4S/c1-9-4-6-12(7-5-9)23(21,22)15-13(8-16)10(2)14(18(19)20)11(3)17-15/h4-7H,1-3H3	SWVOLMFAZXVBNL-UHFFFAOYSA-N	11297	4,6-dimethyl-2-[(4-methylbenzene)sulfonyl]-5-nitropyridine-3-carbonitrile::Compound 1 analog 8::cid_2726176	3C-like proteinase (3CL-PRO)	Human SARS coronavirus		13000					7	25.00 C	Curated from the literature by BindingDB	10.1021/jm060207o	16913704			Lu, IL; Mahindroo, N; Liang, PH; Peng, YH; Kuo, CJ; Tsai, KC; Hsieh, HP; Chao, YS; Wu, SY	National Defense Medical Center	http://www.bindingdb.org/bind/chemsearch/marvin/MolStructure.jsp?monomerid=11297	http://www.bindingdb.org/jsp/dbsearch/PrimarySearch_ki.jsp?energyterm=kJ/mole&tag=pol&polymerid=4753&target=3C-like+proteinase+%283CL-PRO%29&column=ki&startPg=0&Increment=50&submit=Search	http://www.bindingdb.org/jsp/dbsearch/PrimarySearch_ki.jsp?energyterm=kJ/mole&tag=r21&monomerid=11297&enzyme=3C-like+proteinase+%283CL-PRO%29&column=ki&startPg=0&Increment=50&submit=Search			2726176	46511844						ZINC00075474	1	MESLVLGVNEKTHVQLSLPVLQVRDVLVRGFGDSVEEALSEAREHLKNGTCGLVELEKGVLPQLEQPYVFIKRSDALSTNHGHKVVELVAEMDGIQYGRSGITLGVLVPHVGETPIAYRNVLLRKNGNKGAGGHSYGIDLKSYDLGDELGTDPIEDYEQNWNTKHGSGALRELTRELNGGAVTRYVDNNFCGPDGYPLDCIKDFLARAGKSMCTLSEQLDYIESKRGVYCCRDHEHEIAWFTERSDKSYEHQTPFEIKSAKKFDTFKGECPKFVFPLNSKVKVIQPRVEKKKTEGFMGRIRSVYPVASPQECNNMHLSTLMKCNHCDEVSWQTCDFLKATCEHCGTENLVIEGPTTCGYLPTNAVVKMPCPACQDPEIGPEHSVADYHNHSNIETRLRK…	1Q2W,1QZ8,1UJ1,1UK2,1UK3,1UK4,1UW7,1WOF,1Z1I,2A5A,2A5I,2A5K,2ACF,2AHM,2ALV,2AMD,2AMQ,2BX3,2BX4,2C3S,2D2D,2DUC,2FAV,2FE8,2FYG,2G9T,2GA6,2GDT,2GRI,2GT7,2GT8,2GTB,2GX4,2GZ7,2GZ8,2GZ9,2H2Z,2HOB,2HSX,2IDY,2JZF,2K7X,2K87,2KAF,2LIZ,2OP9,2OZK,2RNK,2V6N,2VJ1,2XYQ,2XYR,2XYV,2Z3C,2Z3D,2Z3E,2Z94,2Z9G,2Z9J,2Z9K,2Z9L,2ZU4,2ZU5,3D62,3E91,3E9S,3EA7,3EA8,3EBN,3IWM,3M3V,3MJ5,3R24,3SN8,3SNA,3SNB,3SNC,3SND,3SNE,3SZN…	Replicase polyprotein 1ab	R1AB_CVHSA	P0C6X7	P59641,Q6WGN0,Q7T697,Q808C0,Q80BV7,Q80BV8,Q80E51
19543	[O-][N+](=O)c1ccc([n+]([O-])c1)S(=O)(=O)c1ccc(Cl)cc1	InChI=1S/C11H7ClN2O5S/c12-8-1-4-10(5-2-8)20(18,19)11-6-3-9(14(16)17)7-13(11)15/h1-7H	CWTLKYCMNTVRJN-UHFFFAOYSA-N	11298	2-[(4-chlorobenzene)sulfonyl]-5-nitro-1-oxidopyridin-1-ium::Compound 1 analog 9	3C-like proteinase (3CL-PRO)	Human SARS coronavirus		15000					7	25.00 C	Curated from the literature by BindingDB	10.1021/jm060207o	16913704			Lu, IL; Mahindroo, N; Liang, PH; Peng, YH; Kuo, CJ; Tsai, KC; Hsieh, HP; Chao, YS; Wu, SY	National Defense Medical Center	http://www.bindingdb.org/bind/chemsearch/marvin/MolStructure.jsp?monomerid=11298	http://www.bindingdb.org/jsp/dbsearch/PrimarySearch_ki.jsp?energyterm=kJ/mole&tag=pol&polymerid=4753&target=3C-like+proteinase+%283CL-PRO%29&column=ki&startPg=0&Increment=50&submit=Search	http://www.bindingdb.org/jsp/dbsearch/PrimarySearch_ki.jsp?energyterm=kJ/mole&tag=r21&monomerid=11298&enzyme=3C-like+proteinase+%283CL-PRO%29&column=ki&startPg=0&Increment=50&submit=Search			2774667	46511845						ZINC02163160	1	MESLVLGVNEKTHVQLSLPVLQVRDVLVRGFGDSVEEALSEAREHLKNGTCGLVELEKGVLPQLEQPYVFIKRSDALSTNHGHKVVELVAEMDGIQYGRSGITLGVLVPHVGETPIAYRNVLLRKNGNKGAGGHSYGIDLKSYDLGDELGTDPIEDYEQNWNTKHGSGALRELTRELNGGAVTRYVDNNFCGPDGYPLDCIKDFLARAGKSMCTLSEQLDYIESKRGVYCCRDHEHEIAWFTERSDKSYEHQTPFEIKSAKKFDTFKGECPKFVFPLNSKVKVIQPRVEKKKTEGFMGRIRSVYPVASPQECNNMHLSTLMKCNHCDEVSWQTCDFLKATCEHCGTENLVIEGPTTCGYLPTNAVVKMPCPACQDPEIGPEHSVADYHNHSNIETRLRK…	1Q2W,1QZ8,1UJ1,1UK2,1UK3,1UK4,1UW7,1WOF,1Z1I,2A5A,2A5I,2A5K,2ACF,2AHM,2ALV,2AMD,2AMQ,2BX3,2BX4,2C3S,2D2D,2DUC,2FAV,2FE8,2FYG,2G9T,2GA6,2GDT,2GRI,2GT7,2GT8,2GTB,2GX4,2GZ7,2GZ8,2GZ9,2H2Z,2HOB,2HSX,2IDY,2JZF,2K7X,2K87,2KAF,2LIZ,2OP9,2OZK,2RNK,2V6N,2VJ1,2XYQ,2XYR,2XYV,2Z3C,2Z3D,2Z3E,2Z94,2Z9G,2Z9J,2Z9K,2Z9L,2ZU4,2ZU5,3D62,3E91,3E9S,3EA7,3EA8,3EBN,3IWM,3M3V,3MJ5,3R24,3SN8,3SNA,3SNB,3SNC,3SND,3SNE,3SZN…	Replicase polyprotein 1ab	R1AB_CVHSA	P0C6X7	P59641,Q6WGN0,Q7T697,Q808C0,Q80BV7,Q80BV8,Q80E51
19544	CCOC(=O)C(C=Nc1ccc(cc1)S(=O)(=O)c1ccc(cc1)N=CC(C#N)C(=O)OCC)C#N	InChI=1/C24H22N4O6S/c1-3-33-23(29)17(13-25)15-27-19-5-9-21(10-6-19)35(31,32)22-11-7-20(8-12-22)28-16-18(14-26)24(30)34-4-2/h5-12,15-18H,3-4H2,1-2H3/b27-15+,28-16+	SAZFDZVQWXQDCI-DPCVLPDWNA-N	11299	Compound 1 analog 10::ethyl (2E)-2-cyano-3-({4-[(4-{[(1E)-2-cyano-3-ethoxy-3-oxoprop-1-en-1-yl]amino}benzene)sulfonyl]phenyl}amino)prop-2-enoate	3C-like proteinase (3CL-PRO)	Human SARS coronavirus		16000					7	25.00 C	Curated from the literature by BindingDB	10.1021/jm060207o	16913704			Lu, IL; Mahindroo, N; Liang, PH; Peng, YH; Kuo, CJ; Tsai, KC; Hsieh, HP; Chao, YS; Wu, SY	National Defense Medical Center	http://www.bindingdb.org/bind/chemsearch/marvin/MolStructure.jsp?monomerid=11299	http://www.bindingdb.org/jsp/dbsearch/PrimarySearch_ki.jsp?energyterm=kJ/mole&tag=pol&polymerid=4753&target=3C-like+proteinase+%283CL-PRO%29&column=ki&startPg=0&Increment=50&submit=Search	http://www.bindingdb.org/jsp/dbsearch/PrimarySearch_ki.jsp?energyterm=kJ/mole&tag=r21&monomerid=11299&enzyme=3C-like+proteinase+%283CL-PRO%29&column=ki&startPg=0&Increment=50&submit=Search			91593741	46511846						ZINC08626728	1	MESLVLGVNEKTHVQLSLPVLQVRDVLVRGFGDSVEEALSEAREHLKNGTCGLVELEKGVLPQLEQPYVFIKRSDALSTNHGHKVVELVAEMDGIQYGRSGITLGVLVPHVGETPIAYRNVLLRKNGNKGAGGHSYGIDLKSYDLGDELGTDPIEDYEQNWNTKHGSGALRELTRELNGGAVTRYVDNNFCGPDGYPLDCIKDFLARAGKSMCTLSEQLDYIESKRGVYCCRDHEHEIAWFTERSDKSYEHQTPFEIKSAKKFDTFKGECPKFVFPLNSKVKVIQPRVEKKKTEGFMGRIRSVYPVASPQECNNMHLSTLMKCNHCDEVSWQTCDFLKATCEHCGTENLVIEGPTTCGYLPTNAVVKMPCPACQDPEIGPEHSVADYHNHSNIETRLRK…	1Q2W,1QZ8,1UJ1,1UK2,1UK3,1UK4,1UW7,1WOF,1Z1I,2A5A,2A5I,2A5K,2ACF,2AHM,2ALV,2AMD,2AMQ,2BX3,2BX4,2C3S,2D2D,2DUC,2FAV,2FE8,2FYG,2G9T,2GA6,2GDT,2GRI,2GT7,2GT8,2GTB,2GX4,2GZ7,2GZ8,2GZ9,2H2Z,2HOB,2HSX,2IDY,2JZF,2K7X,2K87,2KAF,2LIZ,2OP9,2OZK,2RNK,2V6N,2VJ1,2XYQ,2XYR,2XYV,2Z3C,2Z3D,2Z3E,2Z94,2Z9G,2Z9J,2Z9K,2Z9L,2ZU4,2ZU5,3D62,3E91,3E9S,3EA7,3EA8,3EBN,3IWM,3M3V,3MJ5,3R24,3SN8,3SNA,3SNB,3SNC,3SND,3SNE,3SZN…	Replicase polyprotein 1ab	R1AB_CVHSA	P0C6X7	P59641,Q6WGN0,Q7T697,Q808C0,Q80BV7,Q80BV8,Q80E51
19545	OC(=O)c1ccc(cc1)S(=O)(=O)c1cc(Br)c(O)c(Br)c1	InChI=1S/C13H8Br2O5S/c14-10-5-9(6-11(15)12(10)16)21(19,20)8-3-1-7(2-4-8)13(17)18/h1-6,16H,(H,17,18)	PWOOQGJCRRKDBU-UHFFFAOYSA-N	11300	4-[(3,5-dibromo-4-hydroxybenzene)sulfonyl]benzoic acid::Compound 1 analog 11	3C-like proteinase (3CL-PRO)	Human SARS coronavirus		16000					7	25.00 C	Curated from the literature by BindingDB	10.1021/jm060207o	16913704			Lu, IL; Mahindroo, N; Liang, PH; Peng, YH; Kuo, CJ; Tsai, KC; Hsieh, HP; Chao, YS; Wu, SY	National Defense Medical Center	http://www.bindingdb.org/bind/chemsearch/marvin/MolStructure.jsp?monomerid=11300	http://www.bindingdb.org/jsp/dbsearch/PrimarySearch_ki.jsp?energyterm=kJ/mole&tag=pol&polymerid=4753&target=3C-like+proteinase+%283CL-PRO%29&column=ki&startPg=0&Increment=50&submit=Search	http://www.bindingdb.org/jsp/dbsearch/PrimarySearch_ki.jsp?energyterm=kJ/mole&tag=r21&monomerid=11300&enzyme=3C-like+proteinase+%283CL-PRO%29&column=ki&startPg=0&Increment=50&submit=Search			2775844	46511847						ZINC19851614	1	MESLVLGVNEKTHVQLSLPVLQVRDVLVRGFGDSVEEALSEAREHLKNGTCGLVELEKGVLPQLEQPYVFIKRSDALSTNHGHKVVELVAEMDGIQYGRSGITLGVLVPHVGETPIAYRNVLLRKNGNKGAGGHSYGIDLKSYDLGDELGTDPIEDYEQNWNTKHGSGALRELTRELNGGAVTRYVDNNFCGPDGYPLDCIKDFLARAGKSMCTLSEQLDYIESKRGVYCCRDHEHEIAWFTERSDKSYEHQTPFEIKSAKKFDTFKGECPKFVFPLNSKVKVIQPRVEKKKTEGFMGRIRSVYPVASPQECNNMHLSTLMKCNHCDEVSWQTCDFLKATCEHCGTENLVIEGPTTCGYLPTNAVVKMPCPACQDPEIGPEHSVADYHNHSNIETRLRK…	1Q2W,1QZ8,1UJ1,1UK2,1UK3,1UK4,1UW7,1WOF,1Z1I,2A5A,2A5I,2A5K,2ACF,2AHM,2ALV,2AMD,2AMQ,2BX3,2BX4,2C3S,2D2D,2DUC,2FAV,2FE8,2FYG,2G9T,2GA6,2GDT,2GRI,2GT7,2GT8,2GTB,2GX4,2GZ7,2GZ8,2GZ9,2H2Z,2HOB,2HSX,2IDY,2JZF,2K7X,2K87,2KAF,2LIZ,2OP9,2OZK,2RNK,2V6N,2VJ1,2XYQ,2XYR,2XYV,2Z3C,2Z3D,2Z3E,2Z94,2Z9G,2Z9J,2Z9K,2Z9L,2ZU4,2ZU5,3D62,3E91,3E9S,3EA7,3EA8,3EBN,3IWM,3M3V,3MJ5,3R24,3SN8,3SNA,3SNB,3SNC,3SND,3SNE,3SZN…	Replicase polyprotein 1ab	R1AB_CVHSA	P0C6X7	P59641,Q6WGN0,Q7T697,Q808C0,Q80BV7,Q80BV8,Q80E51
19546	CC(=O)c1ccccc1S(=O)(=O)c1ccccc1C(O)=O	InChI=1S/C15H12O5S/c1-10(16)11-6-2-4-8-13(11)21(19,20)14-9-5-3-7-12(14)15(17)18/h2-9H,1H3,(H,17,18)	PZDMHBOCYKZMGI-UHFFFAOYSA-N	11301	2-[(2-acetylbenzene)sulfonyl]benzoic acid::Compound 1 analog 12	3C-like proteinase (3CL-PRO)	Human SARS coronavirus		16000					7	25.00 C	Curated from the literature by BindingDB	10.1021/jm060207o	16913704			Lu, IL; Mahindroo, N; Liang, PH; Peng, YH; Kuo, CJ; Tsai, KC; Hsieh, HP; Chao, YS; Wu, SY	National Defense Medical Center	http://www.bindingdb.org/bind/chemsearch/marvin/MolStructure.jsp?monomerid=11301	http://www.bindingdb.org/jsp/dbsearch/PrimarySearch_ki.jsp?energyterm=kJ/mole&tag=pol&polymerid=4753&target=3C-like+proteinase+%283CL-PRO%29&column=ki&startPg=0&Increment=50&submit=Search	http://www.bindingdb.org/jsp/dbsearch/PrimarySearch_ki.jsp?energyterm=kJ/mole&tag=r21&monomerid=11301&enzyme=3C-like+proteinase+%283CL-PRO%29&column=ki&startPg=0&Increment=50&submit=Search			4270495	46511848						ZINC00136351	1	MESLVLGVNEKTHVQLSLPVLQVRDVLVRGFGDSVEEALSEAREHLKNGTCGLVELEKGVLPQLEQPYVFIKRSDALSTNHGHKVVELVAEMDGIQYGRSGITLGVLVPHVGETPIAYRNVLLRKNGNKGAGGHSYGIDLKSYDLGDELGTDPIEDYEQNWNTKHGSGALRELTRELNGGAVTRYVDNNFCGPDGYPLDCIKDFLARAGKSMCTLSEQLDYIESKRGVYCCRDHEHEIAWFTERSDKSYEHQTPFEIKSAKKFDTFKGECPKFVFPLNSKVKVIQPRVEKKKTEGFMGRIRSVYPVASPQECNNMHLSTLMKCNHCDEVSWQTCDFLKATCEHCGTENLVIEGPTTCGYLPTNAVVKMPCPACQDPEIGPEHSVADYHNHSNIETRLRK…	1Q2W,1QZ8,1UJ1,1UK2,1UK3,1UK4,1UW7,1WOF,1Z1I,2A5A,2A5I,2A5K,2ACF,2AHM,2ALV,2AMD,2AMQ,2BX3,2BX4,2C3S,2D2D,2DUC,2FAV,2FE8,2FYG,2G9T,2GA6,2GDT,2GRI,2GT7,2GT8,2GTB,2GX4,2GZ7,2GZ8,2GZ9,2H2Z,2HOB,2HSX,2IDY,2JZF,2K7X,2K87,2KAF,2LIZ,2OP9,2OZK,2RNK,2V6N,2VJ1,2XYQ,2XYR,2XYV,2Z3C,2Z3D,2Z3E,2Z94,2Z9G,2Z9J,2Z9K,2Z9L,2ZU4,2ZU5,3D62,3E91,3E9S,3EA7,3EA8,3EBN,3IWM,3M3V,3MJ5,3R24,3SN8,3SNA,3SNB,3SNC,3SND,3SNE,3SZN…	Replicase polyprotein 1ab	R1AB_CVHSA	P0C6X7	P59641,Q6WGN0,Q7T697,Q808C0,Q80BV7,Q80BV8,Q80E51
19547	[O-][N+](=O)c1ccc(cc1)S(=O)(=O)c1ccc(cc1)[N+]([O-])=O	InChI=1S/C12H8N2O6S/c15-13(16)9-1-5-11(6-2-9)21(19,20)12-7-3-10(4-8-12)14(17)18/h1-8H	BVHNGWRPAFKGFP-UHFFFAOYSA-N	11302	1-nitro-4-[(4-nitrobenzene)sulfonyl]benzene::Compound 1 analog 13	3C-like proteinase (3CL-PRO)	Human SARS coronavirus		25000					7	25.00 C	Curated from the literature by BindingDB	10.1021/jm060207o	16913704			Lu, IL; Mahindroo, N; Liang, PH; Peng, YH; Kuo, CJ; Tsai, KC; Hsieh, HP; Chao, YS; Wu, SY	National Defense Medical Center	http://www.bindingdb.org/bind/chemsearch/marvin/MolStructure.jsp?monomerid=11302	http://www.bindingdb.org/jsp/dbsearch/PrimarySearch_ki.jsp?energyterm=kJ/mole&tag=pol&polymerid=4753&target=3C-like+proteinase+%283CL-PRO%29&column=ki&startPg=0&Increment=50&submit=Search	http://www.bindingdb.org/jsp/dbsearch/PrimarySearch_ki.jsp?energyterm=kJ/mole&tag=r21&monomerid=11302&enzyme=3C-like+proteinase+%283CL-PRO%29&column=ki&startPg=0&Increment=50&submit=Search			70871	46511849						ZINC01571129	1	MESLVLGVNEKTHVQLSLPVLQVRDVLVRGFGDSVEEALSEAREHLKNGTCGLVELEKGVLPQLEQPYVFIKRSDALSTNHGHKVVELVAEMDGIQYGRSGITLGVLVPHVGETPIAYRNVLLRKNGNKGAGGHSYGIDLKSYDLGDELGTDPIEDYEQNWNTKHGSGALRELTRELNGGAVTRYVDNNFCGPDGYPLDCIKDFLARAGKSMCTLSEQLDYIESKRGVYCCRDHEHEIAWFTERSDKSYEHQTPFEIKSAKKFDTFKGECPKFVFPLNSKVKVIQPRVEKKKTEGFMGRIRSVYPVASPQECNNMHLSTLMKCNHCDEVSWQTCDFLKATCEHCGTENLVIEGPTTCGYLPTNAVVKMPCPACQDPEIGPEHSVADYHNHSNIETRLRK…	1Q2W,1QZ8,1UJ1,1UK2,1UK3,1UK4,1UW7,1WOF,1Z1I,2A5A,2A5I,2A5K,2ACF,2AHM,2ALV,2AMD,2AMQ,2BX3,2BX4,2C3S,2D2D,2DUC,2FAV,2FE8,2FYG,2G9T,2GA6,2GDT,2GRI,2GT7,2GT8,2GTB,2GX4,2GZ7,2GZ8,2GZ9,2H2Z,2HOB,2HSX,2IDY,2JZF,2K7X,2K87,2KAF,2LIZ,2OP9,2OZK,2RNK,2V6N,2VJ1,2XYQ,2XYR,2XYV,2Z3C,2Z3D,2Z3E,2Z94,2Z9G,2Z9J,2Z9K,2Z9L,2ZU4,2ZU5,3D62,3E91,3E9S,3EA7,3EA8,3EBN,3IWM,3M3V,3MJ5,3R24,3SN8,3SNA,3SNB,3SNC,3SND,3SNE,3SZN…	Replicase polyprotein 1ab	R1AB_CVHSA	P0C6X7	P59641,Q6WGN0,Q7T697,Q808C0,Q80BV7,Q80BV8,Q80E51
19548	CCOC(=O)C(C=Nc1ccc(cc1)S(=O)(=O)c1ccc(cc1)N=CC(C(=O)OCC)C(=O)OCC)C(=O)OCC	InChI=1S/C28H32N2O10S/c1-5-37-25(31)23(26(32)38-6-2)17-29-19-9-13-21(14-10-19)41(35,36)22-15-11-20(12-16-22)30-18-24(27(33)39-7-3)28(34)40-8-4/h9-18,23-24H,5-8H2,1-4H3/b29-17+,30-18+	ZGEVEUKFALIUBB-YAGSLNJISA-N	11303	1,3-diethyl 2-[({4-[(4-{[3-ethoxy-2-(ethoxycarbonyl)-3-oxoprop-1-en-1-yl]amino}benzene)sulfonyl]phenyl}amino)methylidene]propanedioate::Compound 1 analog 14	3C-like proteinase (3CL-PRO)	Human SARS coronavirus		32000					7	25.00 C	Curated from the literature by BindingDB	10.1021/jm060207o	16913704			Lu, IL; Mahindroo, N; Liang, PH; Peng, YH; Kuo, CJ; Tsai, KC; Hsieh, HP; Chao, YS; Wu, SY	National Defense Medical Center	http://www.bindingdb.org/bind/chemsearch/marvin/MolStructure.jsp?monomerid=11303	http://www.bindingdb.org/jsp/dbsearch/PrimarySearch_ki.jsp?energyterm=kJ/mole&tag=pol&polymerid=4753&target=3C-like+proteinase+%283CL-PRO%29&column=ki&startPg=0&Increment=50&submit=Search	http://www.bindingdb.org/jsp/dbsearch/PrimarySearch_ki.jsp?energyterm=kJ/mole&tag=r21&monomerid=11303&enzyme=3C-like+proteinase+%283CL-PRO%29&column=ki&startPg=0&Increment=50&submit=Search			91230600	46511850						ZINC08626727	1	MESLVLGVNEKTHVQLSLPVLQVRDVLVRGFGDSVEEALSEAREHLKNGTCGLVELEKGVLPQLEQPYVFIKRSDALSTNHGHKVVELVAEMDGIQYGRSGITLGVLVPHVGETPIAYRNVLLRKNGNKGAGGHSYGIDLKSYDLGDELGTDPIEDYEQNWNTKHGSGALRELTRELNGGAVTRYVDNNFCGPDGYPLDCIKDFLARAGKSMCTLSEQLDYIESKRGVYCCRDHEHEIAWFTERSDKSYEHQTPFEIKSAKKFDTFKGECPKFVFPLNSKVKVIQPRVEKKKTEGFMGRIRSVYPVASPQECNNMHLSTLMKCNHCDEVSWQTCDFLKATCEHCGTENLVIEGPTTCGYLPTNAVVKMPCPACQDPEIGPEHSVADYHNHSNIETRLRK…	1Q2W,1QZ8,1UJ1,1UK2,1UK3,1UK4,1UW7,1WOF,1Z1I,2A5A,2A5I,2A5K,2ACF,2AHM,2ALV,2AMD,2AMQ,2BX3,2BX4,2C3S,2D2D,2DUC,2FAV,2FE8,2FYG,2G9T,2GA6,2GDT,2GRI,2GT7,2GT8,2GTB,2GX4,2GZ7,2GZ8,2GZ9,2H2Z,2HOB,2HSX,2IDY,2JZF,2K7X,2K87,2KAF,2LIZ,2OP9,2OZK,2RNK,2V6N,2VJ1,2XYQ,2XYR,2XYV,2Z3C,2Z3D,2Z3E,2Z94,2Z9G,2Z9J,2Z9K,2Z9L,2ZU4,2ZU5,3D62,3E91,3E9S,3EA7,3EA8,3EBN,3IWM,3M3V,3MJ5,3R24,3SN8,3SNA,3SNB,3SNC,3SND,3SNE,3SZN…	Replicase polyprotein 1ab	R1AB_CVHSA	P0C6X7	P59641,Q6WGN0,Q7T697,Q808C0,Q80BV7,Q80BV8,Q80E51
19549	FC(F)(F)c1nnc(SC(=O)c2ccc(o2)C#Cc2ccccc2)[nH]1	InChI=1S/C16H8F3N3O2S/c17-16(18,19)14-20-15(22-21-14)25-13(23)12-9-8-11(24-12)7-6-10-4-2-1-3-5-10/h1-5,8-9H,(H,20,21,22)	VNGWUVBXUIDQTK-UHFFFAOYSA-N	11304	Compound 2 analog 15::MurB inhibitor (compound 16)::[5-(2-phenylethynyl)furan-2-yl]({[5-(trifluoromethyl)-4H-1,2,4-triazol-3-yl]sulfanyl})methanone	3C-like proteinase (3CL-PRO)	Human SARS coronavirus		3000							Curated from the literature by BindingDB	10.1021/jm060207o	16913704			Lu, IL; Mahindroo, N; Liang, PH; Peng, YH; Kuo, CJ; Tsai, KC; Hsieh, HP; Chao, YS; Wu, SY	National Defense Medical Center	http://www.bindingdb.org/bind/chemsearch/marvin/MolStructure.jsp?monomerid=11304	http://www.bindingdb.org/jsp/dbsearch/PrimarySearch_ki.jsp?energyterm=kJ/mole&tag=pol&polymerid=4753&target=3C-like+proteinase+%283CL-PRO%29&column=ki&startPg=0&Increment=50&submit=Search	http://www.bindingdb.org/jsp/dbsearch/PrimarySearch_ki.jsp?energyterm=kJ/mole&tag=r21&monomerid=11304&enzyme=3C-like+proteinase+%283CL-PRO%29&column=ki&startPg=0&Increment=50&submit=Search	F3F	2GZ8	2822496	46511851	42403		DB07743			ZINC01039846	1	MESLVLGVNEKTHVQLSLPVLQVRDVLVRGFGDSVEEALSEAREHLKNGTCGLVELEKGVLPQLEQPYVFIKRSDALSTNHGHKVVELVAEMDGIQYGRSGITLGVLVPHVGETPIAYRNVLLRKNGNKGAGGHSYGIDLKSYDLGDELGTDPIEDYEQNWNTKHGSGALRELTRELNGGAVTRYVDNNFCGPDGYPLDCIKDFLARAGKSMCTLSEQLDYIESKRGVYCCRDHEHEIAWFTERSDKSYEHQTPFEIKSAKKFDTFKGECPKFVFPLNSKVKVIQPRVEKKKTEGFMGRIRSVYPVASPQECNNMHLSTLMKCNHCDEVSWQTCDFLKATCEHCGTENLVIEGPTTCGYLPTNAVVKMPCPACQDPEIGPEHSVADYHNHSNIETRLRK…	1Q2W,1QZ8,1UJ1,1UK2,1UK3,1UK4,1UW7,1WOF,1Z1I,2A5A,2A5I,2A5K,2ACF,2AHM,2ALV,2AMD,2AMQ,2BX3,2BX4,2C3S,2D2D,2DUC,2FAV,2FE8,2FYG,2G9T,2GA6,2GDT,2GRI,2GT7,2GT8,2GTB,2GX4,2GZ7,2GZ8,2GZ9,2H2Z,2HOB,2HSX,2IDY,2JZF,2K7X,2K87,2KAF,2LIZ,2OP9,2OZK,2RNK,2V6N,2VJ1,2XYQ,2XYR,2XYV,2Z3C,2Z3D,2Z3E,2Z94,2Z9G,2Z9J,2Z9K,2Z9L,2ZU4,2ZU5,3D62,3E91,3E9S,3EA7,3EA8,3EBN,3IWM,3M3V,3MJ5,3R24,3SN8,3SNA,3SNB,3SNC,3SND,3SNE,3SZN…	Replicase polyprotein 1ab	R1AB_CVHSA	P0C6X7	P59641,Q6WGN0,Q7T697,Q808C0,Q80BV7,Q80BV8,Q80E51
19550	Cc1[n-][o+]c(NC(=O)c2ccc(s2)-c2cc(nn2C)C(F)(F)F)c1[N+]([O-])=O	InChI=1S/C14H10F3N5O4S/c1-6-11(22(24)25)13(26-20-6)18-12(23)9-4-3-8(27-9)7-5-10(14(15,16)17)19-21(7)2/h3-5H,1-2H3,(H,18,23)	BCEDEDBQGPNQMM-UHFFFAOYSA-N	11305	5-[1-methyl-3-(trifluoromethyl)-1H-pyrazol-5-yl]-N-(3-methyl-4-nitro-1,2-oxazol-5-yl)thiophene-2-carboxamide::Compound 2 analog 16	3C-like proteinase (3CL-PRO)	Human SARS coronavirus		5000							Curated from the literature by BindingDB	10.1021/jm060207o	16913704			Lu, IL; Mahindroo, N; Liang, PH; Peng, YH; Kuo, CJ; Tsai, KC; Hsieh, HP; Chao, YS; Wu, SY	National Defense Medical Center	http://www.bindingdb.org/bind/chemsearch/marvin/MolStructure.jsp?monomerid=11305	http://www.bindingdb.org/jsp/dbsearch/PrimarySearch_ki.jsp?energyterm=kJ/mole&tag=pol&polymerid=4753&target=3C-like+proteinase+%283CL-PRO%29&column=ki&startPg=0&Increment=50&submit=Search	http://www.bindingdb.org/jsp/dbsearch/PrimarySearch_ki.jsp?energyterm=kJ/mole&tag=r21&monomerid=11305&enzyme=3C-like+proteinase+%283CL-PRO%29&column=ki&startPg=0&Increment=50&submit=Search			3776668	46511852						ZINC05212111	1	MESLVLGVNEKTHVQLSLPVLQVRDVLVRGFGDSVEEALSEAREHLKNGTCGLVELEKGVLPQLEQPYVFIKRSDALSTNHGHKVVELVAEMDGIQYGRSGITLGVLVPHVGETPIAYRNVLLRKNGNKGAGGHSYGIDLKSYDLGDELGTDPIEDYEQNWNTKHGSGALRELTRELNGGAVTRYVDNNFCGPDGYPLDCIKDFLARAGKSMCTLSEQLDYIESKRGVYCCRDHEHEIAWFTERSDKSYEHQTPFEIKSAKKFDTFKGECPKFVFPLNSKVKVIQPRVEKKKTEGFMGRIRSVYPVASPQECNNMHLSTLMKCNHCDEVSWQTCDFLKATCEHCGTENLVIEGPTTCGYLPTNAVVKMPCPACQDPEIGPEHSVADYHNHSNIETRLRK…	1Q2W,1QZ8,1UJ1,1UK2,1UK3,1UK4,1UW7,1WOF,1Z1I,2A5A,2A5I,2A5K,2ACF,2AHM,2ALV,2AMD,2AMQ,2BX3,2BX4,2C3S,2D2D,2DUC,2FAV,2FE8,2FYG,2G9T,2GA6,2GDT,2GRI,2GT7,2GT8,2GTB,2GX4,2GZ7,2GZ8,2GZ9,2H2Z,2HOB,2HSX,2IDY,2JZF,2K7X,2K87,2KAF,2LIZ,2OP9,2OZK,2RNK,2V6N,2VJ1,2XYQ,2XYR,2XYV,2Z3C,2Z3D,2Z3E,2Z94,2Z9G,2Z9J,2Z9K,2Z9L,2ZU4,2ZU5,3D62,3E91,3E9S,3EA7,3EA8,3EBN,3IWM,3M3V,3MJ5,3R24,3SN8,3SNA,3SNB,3SNC,3SND,3SNE,3SZN…	Replicase polyprotein 1ab	R1AB_CVHSA	P0C6X7	P59641,Q6WGN0,Q7T697,Q808C0,Q80BV7,Q80BV8,Q80E51
19551	Cc1oc(cc1-c1cc(NS(=O)(=O)c2cccs2)[nH]n1)C(C)(C)C	InChI=1S/C16H19N3O3S2/c1-10-11(8-13(22-10)16(2,3)4)12-9-14(18-17-12)19-24(20,21)15-6-5-7-23-15/h5-9H,1-4H3,(H2,17,18,19)	HUNAFKUGDBHPEN-UHFFFAOYSA-N	11306	Compound 2 analog 17::N-[3-(5-tert-butyl-2-methylfuran-3-yl)-1H-pyrazol-5-yl]thiophene-2-sulfonamide	3C-like proteinase (3CL-PRO)	Human SARS coronavirus		10000							Curated from the literature by BindingDB	10.1021/jm060207o	16913704			Lu, IL; Mahindroo, N; Liang, PH; Peng, YH; Kuo, CJ; Tsai, KC; Hsieh, HP; Chao, YS; Wu, SY	National Defense Medical Center	http://www.bindingdb.org/bind/chemsearch/marvin/MolStructure.jsp?monomerid=11306	http://www.bindingdb.org/jsp/dbsearch/PrimarySearch_ki.jsp?energyterm=kJ/mole&tag=pol&polymerid=4753&target=3C-like+proteinase+%283CL-PRO%29&column=ki&startPg=0&Increment=50&submit=Search	http://www.bindingdb.org/jsp/dbsearch/PrimarySearch_ki.jsp?energyterm=kJ/mole&tag=r21&monomerid=11306&enzyme=3C-like+proteinase+%283CL-PRO%29&column=ki&startPg=0&Increment=50&submit=Search			2742278	46511853						ZINC01046803	1	MESLVLGVNEKTHVQLSLPVLQVRDVLVRGFGDSVEEALSEAREHLKNGTCGLVELEKGVLPQLEQPYVFIKRSDALSTNHGHKVVELVAEMDGIQYGRSGITLGVLVPHVGETPIAYRNVLLRKNGNKGAGGHSYGIDLKSYDLGDELGTDPIEDYEQNWNTKHGSGALRELTRELNGGAVTRYVDNNFCGPDGYPLDCIKDFLARAGKSMCTLSEQLDYIESKRGVYCCRDHEHEIAWFTERSDKSYEHQTPFEIKSAKKFDTFKGECPKFVFPLNSKVKVIQPRVEKKKTEGFMGRIRSVYPVASPQECNNMHLSTLMKCNHCDEVSWQTCDFLKATCEHCGTENLVIEGPTTCGYLPTNAVVKMPCPACQDPEIGPEHSVADYHNHSNIETRLRK…	1Q2W,1QZ8,1UJ1,1UK2,1UK3,1UK4,1UW7,1WOF,1Z1I,2A5A,2A5I,2A5K,2ACF,2AHM,2ALV,2AMD,2AMQ,2BX3,2BX4,2C3S,2D2D,2DUC,2FAV,2FE8,2FYG,2G9T,2GA6,2GDT,2GRI,2GT7,2GT8,2GTB,2GX4,2GZ7,2GZ8,2GZ9,2H2Z,2HOB,2HSX,2IDY,2JZF,2K7X,2K87,2KAF,2LIZ,2OP9,2OZK,2RNK,2V6N,2VJ1,2XYQ,2XYR,2XYV,2Z3C,2Z3D,2Z3E,2Z94,2Z9G,2Z9J,2Z9K,2Z9L,2ZU4,2ZU5,3D62,3E91,3E9S,3EA7,3EA8,3EBN,3IWM,3M3V,3MJ5,3R24,3SN8,3SNA,3SNB,3SNC,3SND,3SNE,3SZN…	Replicase polyprotein 1ab	R1AB_CVHSA	P0C6X7	P59641,Q6WGN0,Q7T697,Q808C0,Q80BV7,Q80BV8,Q80E51
19552	CSc1n[nH]c(NC(=O)c2cccs2)c1S(=O)(=O)c1ccc(Cl)cc1	InChI=1S/C15H12ClN3O3S3/c1-23-15-12(25(21,22)10-6-4-9(16)5-7-10)13(18-19-15)17-14(20)11-3-2-8-24-11/h2-8H,1H3,(H2,17,18,19,20)	WTTWXUFEJVILJY-UHFFFAOYSA-N	11307	Compound 2 analog 18::N-{4-[(4-chlorobenzene)sulfonyl]-3-(methylsulfanyl)-1H-pyrazol-5-yl}thiophene-2-carboxamide	3C-like proteinase (3CL-PRO)	Human SARS coronavirus		15000							Curated from the literature by BindingDB	10.1021/jm060207o	16913704			Lu, IL; Mahindroo, N; Liang, PH; Peng, YH; Kuo, CJ; Tsai, KC; Hsieh, HP; Chao, YS; Wu, SY	National Defense Medical Center	http://www.bindingdb.org/bind/chemsearch/marvin/MolStructure.jsp?monomerid=11307	http://www.bindingdb.org/jsp/dbsearch/PrimarySearch_ki.jsp?energyterm=kJ/mole&tag=pol&polymerid=4753&target=3C-like+proteinase+%283CL-PRO%29&column=ki&startPg=0&Increment=50&submit=Search	http://www.bindingdb.org/jsp/dbsearch/PrimarySearch_ki.jsp?energyterm=kJ/mole&tag=r21&monomerid=11307&enzyme=3C-like+proteinase+%283CL-PRO%29&column=ki&startPg=0&Increment=50&submit=Search			2819269	46511854						ZINC14947945	1	MESLVLGVNEKTHVQLSLPVLQVRDVLVRGFGDSVEEALSEAREHLKNGTCGLVELEKGVLPQLEQPYVFIKRSDALSTNHGHKVVELVAEMDGIQYGRSGITLGVLVPHVGETPIAYRNVLLRKNGNKGAGGHSYGIDLKSYDLGDELGTDPIEDYEQNWNTKHGSGALRELTRELNGGAVTRYVDNNFCGPDGYPLDCIKDFLARAGKSMCTLSEQLDYIESKRGVYCCRDHEHEIAWFTERSDKSYEHQTPFEIKSAKKFDTFKGECPKFVFPLNSKVKVIQPRVEKKKTEGFMGRIRSVYPVASPQECNNMHLSTLMKCNHCDEVSWQTCDFLKATCEHCGTENLVIEGPTTCGYLPTNAVVKMPCPACQDPEIGPEHSVADYHNHSNIETRLRK…	1Q2W,1QZ8,1UJ1,1UK2,1UK3,1UK4,1UW7,1WOF,1Z1I,2A5A,2A5I,2A5K,2ACF,2AHM,2ALV,2AMD,2AMQ,2BX3,2BX4,2C3S,2D2D,2DUC,2FAV,2FE8,2FYG,2G9T,2GA6,2GDT,2GRI,2GT7,2GT8,2GTB,2GX4,2GZ7,2GZ8,2GZ9,2H2Z,2HOB,2HSX,2IDY,2JZF,2K7X,2K87,2KAF,2LIZ,2OP9,2OZK,2RNK,2V6N,2VJ1,2XYQ,2XYR,2XYV,2Z3C,2Z3D,2Z3E,2Z94,2Z9G,2Z9J,2Z9K,2Z9L,2ZU4,2ZU5,3D62,3E91,3E9S,3EA7,3EA8,3EBN,3IWM,3M3V,3MJ5,3R24,3SN8,3SNA,3SNB,3SNC,3SND,3SNE,3SZN…	Replicase polyprotein 1ab	R1AB_CVHSA	P0C6X7	P59641,Q6WGN0,Q7T697,Q808C0,Q80BV7,Q80BV8,Q80E51
19553	CC1(C)Cc2c(sc(NCc3ccco3)c2C(=O)C1)C#N	InChI=1S/C16H16N2O2S/c1-16(2)6-11-13(8-17)21-15(14(11)12(19)7-16)18-9-10-4-3-5-20-10/h3-5,18H,6-7,9H2,1-2H3	OELFRKXRVLKMSJ-UHFFFAOYSA-N	11308	3-[(furan-2-ylmethyl)amino]-6,6-dimethyl-4-oxo-4,5,6,7-tetrahydro-2-benzothiophene-1-carbonitrile::Compound 2 analog 19	3C-like proteinase (3CL-PRO)	Human SARS coronavirus		16000							Curated from the literature by BindingDB	10.1021/jm060207o	16913704			Lu, IL; Mahindroo, N; Liang, PH; Peng, YH; Kuo, CJ; Tsai, KC; Hsieh, HP; Chao, YS; Wu, SY	National Defense Medical Center	http://www.bindingdb.org/bind/chemsearch/marvin/MolStructure.jsp?monomerid=11308	http://www.bindingdb.org/jsp/dbsearch/PrimarySearch_ki.jsp?energyterm=kJ/mole&tag=pol&polymerid=4753&target=3C-like+proteinase+%283CL-PRO%29&column=ki&startPg=0&Increment=50&submit=Search	http://www.bindingdb.org/jsp/dbsearch/PrimarySearch_ki.jsp?energyterm=kJ/mole&tag=r21&monomerid=11308&enzyme=3C-like+proteinase+%283CL-PRO%29&column=ki&startPg=0&Increment=50&submit=Search			2820775	46511855						ZINC00148901	1	MESLVLGVNEKTHVQLSLPVLQVRDVLVRGFGDSVEEALSEAREHLKNGTCGLVELEKGVLPQLEQPYVFIKRSDALSTNHGHKVVELVAEMDGIQYGRSGITLGVLVPHVGETPIAYRNVLLRKNGNKGAGGHSYGIDLKSYDLGDELGTDPIEDYEQNWNTKHGSGALRELTRELNGGAVTRYVDNNFCGPDGYPLDCIKDFLARAGKSMCTLSEQLDYIESKRGVYCCRDHEHEIAWFTERSDKSYEHQTPFEIKSAKKFDTFKGECPKFVFPLNSKVKVIQPRVEKKKTEGFMGRIRSVYPVASPQECNNMHLSTLMKCNHCDEVSWQTCDFLKATCEHCGTENLVIEGPTTCGYLPTNAVVKMPCPACQDPEIGPEHSVADYHNHSNIETRLRK…	1Q2W,1QZ8,1UJ1,1UK2,1UK3,1UK4,1UW7,1WOF,1Z1I,2A5A,2A5I,2A5K,2ACF,2AHM,2ALV,2AMD,2AMQ,2BX3,2BX4,2C3S,2D2D,2DUC,2FAV,2FE8,2FYG,2G9T,2GA6,2GDT,2GRI,2GT7,2GT8,2GTB,2GX4,2GZ7,2GZ8,2GZ9,2H2Z,2HOB,2HSX,2IDY,2JZF,2K7X,2K87,2KAF,2LIZ,2OP9,2OZK,2RNK,2V6N,2VJ1,2XYQ,2XYR,2XYV,2Z3C,2Z3D,2Z3E,2Z94,2Z9G,2Z9J,2Z9K,2Z9L,2ZU4,2ZU5,3D62,3E91,3E9S,3EA7,3EA8,3EBN,3IWM,3M3V,3MJ5,3R24,3SN8,3SNA,3SNB,3SNC,3SND,3SNE,3SZN…	Replicase polyprotein 1ab	R1AB_CVHSA	P0C6X7	P59641,Q6WGN0,Q7T697,Q808C0,Q80BV7,Q80BV8,Q80E51
19554	CSc1nn(c(-c2cccs2)c1C#N)-c1c(c(C)nn1C)[N+]([O-])=O	InChI=1S/C14H12N6O2S2/c1-8-11(20(21)22)14(18(2)16-8)19-12(10-5-4-6-24-10)9(7-15)13(17-19)23-3/h4-6H,1-3H3	NTMNWUJSOXLLCJ-UHFFFAOYSA-N	11309	1-(1,3-dimethyl-4-nitro-1H-pyrazol-5-yl)-3-(methylsulfanyl)-5-(thiophen-2-yl)-1H-pyrazole-4-carbonitrile::Compound 2 analog 20	3C-like proteinase (3CL-PRO)	Human SARS coronavirus		18000							Curated from the literature by BindingDB	10.1021/jm060207o	16913704			Lu, IL; Mahindroo, N; Liang, PH; Peng, YH; Kuo, CJ; Tsai, KC; Hsieh, HP; Chao, YS; Wu, SY	National Defense Medical Center	http://www.bindingdb.org/bind/chemsearch/marvin/MolStructure.jsp?monomerid=11309	http://www.bindingdb.org/jsp/dbsearch/PrimarySearch_ki.jsp?energyterm=kJ/mole&tag=pol&polymerid=4753&target=3C-like+proteinase+%283CL-PRO%29&column=ki&startPg=0&Increment=50&submit=Search	http://www.bindingdb.org/jsp/dbsearch/PrimarySearch_ki.jsp?energyterm=kJ/mole&tag=r21&monomerid=11309&enzyme=3C-like+proteinase+%283CL-PRO%29&column=ki&startPg=0&Increment=50&submit=Search			4398304	46511856						ZINC06469850	1	MESLVLGVNEKTHVQLSLPVLQVRDVLVRGFGDSVEEALSEAREHLKNGTCGLVELEKGVLPQLEQPYVFIKRSDALSTNHGHKVVELVAEMDGIQYGRSGITLGVLVPHVGETPIAYRNVLLRKNGNKGAGGHSYGIDLKSYDLGDELGTDPIEDYEQNWNTKHGSGALRELTRELNGGAVTRYVDNNFCGPDGYPLDCIKDFLARAGKSMCTLSEQLDYIESKRGVYCCRDHEHEIAWFTERSDKSYEHQTPFEIKSAKKFDTFKGECPKFVFPLNSKVKVIQPRVEKKKTEGFMGRIRSVYPVASPQECNNMHLSTLMKCNHCDEVSWQTCDFLKATCEHCGTENLVIEGPTTCGYLPTNAVVKMPCPACQDPEIGPEHSVADYHNHSNIETRLRK…	1Q2W,1QZ8,1UJ1,1UK2,1UK3,1UK4,1UW7,1WOF,1Z1I,2A5A,2A5I,2A5K,2ACF,2AHM,2ALV,2AMD,2AMQ,2BX3,2BX4,2C3S,2D2D,2DUC,2FAV,2FE8,2FYG,2G9T,2GA6,2GDT,2GRI,2GT7,2GT8,2GTB,2GX4,2GZ7,2GZ8,2GZ9,2H2Z,2HOB,2HSX,2IDY,2JZF,2K7X,2K87,2KAF,2LIZ,2OP9,2OZK,2RNK,2V6N,2VJ1,2XYQ,2XYR,2XYV,2Z3C,2Z3D,2Z3E,2Z94,2Z9G,2Z9J,2Z9K,2Z9L,2ZU4,2ZU5,3D62,3E91,3E9S,3EA7,3EA8,3EBN,3IWM,3M3V,3MJ5,3R24,3SN8,3SNA,3SNB,3SNC,3SND,3SNE,3SZN…	Replicase polyprotein 1ab	R1AB_CVHSA	P0C6X7	P59641,Q6WGN0,Q7T697,Q808C0,Q80BV7,Q80BV8,Q80E51
19555	Clc1ccc(s1)-c1csc(CS(=O)(=O)c2cccs2)n1	InChI=1S/C12H8ClNO2S4/c13-10-4-3-9(19-10)8-6-18-11(14-8)7-20(15,16)12-2-1-5-17-12/h1-6H,7H2	RNWCXVNZHBPXSO-UHFFFAOYSA-N	11310	4-(5-chlorothiophen-2-yl)-2-[(thiophene-2-sulfonyl)methyl]-1,3-thiazole hydrobromide::Compound 2 analog 21	3C-like proteinase (3CL-PRO)	Human SARS coronavirus		18000							Curated from the literature by BindingDB	10.1021/jm060207o	16913704			Lu, IL; Mahindroo, N; Liang, PH; Peng, YH; Kuo, CJ; Tsai, KC; Hsieh, HP; Chao, YS; Wu, SY	National Defense Medical Center	http://www.bindingdb.org/bind/chemsearch/marvin/MolStructure.jsp?monomerid=11310	http://www.bindingdb.org/jsp/dbsearch/PrimarySearch_ki.jsp?energyterm=kJ/mole&tag=pol&polymerid=4753&target=3C-like+proteinase+%283CL-PRO%29&column=ki&startPg=0&Increment=50&submit=Search	http://www.bindingdb.org/jsp/dbsearch/PrimarySearch_ki.jsp?energyterm=kJ/mole&tag=r21&monomerid=11310&enzyme=3C-like+proteinase+%283CL-PRO%29&column=ki&startPg=0&Increment=50&submit=Search			2809433	46511857						ZINC01028333	1	MESLVLGVNEKTHVQLSLPVLQVRDVLVRGFGDSVEEALSEAREHLKNGTCGLVELEKGVLPQLEQPYVFIKRSDALSTNHGHKVVELVAEMDGIQYGRSGITLGVLVPHVGETPIAYRNVLLRKNGNKGAGGHSYGIDLKSYDLGDELGTDPIEDYEQNWNTKHGSGALRELTRELNGGAVTRYVDNNFCGPDGYPLDCIKDFLARAGKSMCTLSEQLDYIESKRGVYCCRDHEHEIAWFTERSDKSYEHQTPFEIKSAKKFDTFKGECPKFVFPLNSKVKVIQPRVEKKKTEGFMGRIRSVYPVASPQECNNMHLSTLMKCNHCDEVSWQTCDFLKATCEHCGTENLVIEGPTTCGYLPTNAVVKMPCPACQDPEIGPEHSVADYHNHSNIETRLRK…	1Q2W,1QZ8,1UJ1,1UK2,1UK3,1UK4,1UW7,1WOF,1Z1I,2A5A,2A5I,2A5K,2ACF,2AHM,2ALV,2AMD,2AMQ,2BX3,2BX4,2C3S,2D2D,2DUC,2FAV,2FE8,2FYG,2G9T,2GA6,2GDT,2GRI,2GT7,2GT8,2GTB,2GX4,2GZ7,2GZ8,2GZ9,2H2Z,2HOB,2HSX,2IDY,2JZF,2K7X,2K87,2KAF,2LIZ,2OP9,2OZK,2RNK,2V6N,2VJ1,2XYQ,2XYR,2XYV,2Z3C,2Z3D,2Z3E,2Z94,2Z9G,2Z9J,2Z9K,2Z9L,2ZU4,2ZU5,3D62,3E91,3E9S,3EA7,3EA8,3EBN,3IWM,3M3V,3MJ5,3R24,3SN8,3SNA,3SNB,3SNC,3SND,3SNE,3SZN…	Replicase polyprotein 1ab	R1AB_CVHSA	P0C6X7	P59641,Q6WGN0,Q7T697,Q808C0,Q80BV7,Q80BV8,Q80E51
19556	Cc1nn(C)c(NCc2ccc(s2)-c2cccs2)c1[N+]([O-])=O	InChI=1S/C14H14N4O2S2/c1-9-13(18(19)20)14(17(2)16-9)15-8-10-5-6-12(22-10)11-4-3-7-21-11/h3-7,15H,8H2,1-2H3	FRQPWTXXDABLQI-UHFFFAOYSA-N	11311	1,3-dimethyl-4-nitro-N-{[5-(thiophen-2-yl)thiophen-2-yl]methyl}-1H-pyrazol-5-amine::Compound 2 analog 22	3C-like proteinase (3CL-PRO)	Human SARS coronavirus		20000							Curated from the literature by BindingDB	10.1021/jm060207o	16913704			Lu, IL; Mahindroo, N; Liang, PH; Peng, YH; Kuo, CJ; Tsai, KC; Hsieh, HP; Chao, YS; Wu, SY	National Defense Medical Center	http://www.bindingdb.org/bind/chemsearch/marvin/MolStructure.jsp?monomerid=11311	http://www.bindingdb.org/jsp/dbsearch/PrimarySearch_ki.jsp?energyterm=kJ/mole&tag=pol&polymerid=4753&target=3C-like+proteinase+%283CL-PRO%29&column=ki&startPg=0&Increment=50&submit=Search	http://www.bindingdb.org/jsp/dbsearch/PrimarySearch_ki.jsp?energyterm=kJ/mole&tag=r21&monomerid=11311&enzyme=3C-like+proteinase+%283CL-PRO%29&column=ki&startPg=0&Increment=50&submit=Search			4305683	46511858						ZINC05212044	1	MESLVLGVNEKTHVQLSLPVLQVRDVLVRGFGDSVEEALSEAREHLKNGTCGLVELEKGVLPQLEQPYVFIKRSDALSTNHGHKVVELVAEMDGIQYGRSGITLGVLVPHVGETPIAYRNVLLRKNGNKGAGGHSYGIDLKSYDLGDELGTDPIEDYEQNWNTKHGSGALRELTRELNGGAVTRYVDNNFCGPDGYPLDCIKDFLARAGKSMCTLSEQLDYIESKRGVYCCRDHEHEIAWFTERSDKSYEHQTPFEIKSAKKFDTFKGECPKFVFPLNSKVKVIQPRVEKKKTEGFMGRIRSVYPVASPQECNNMHLSTLMKCNHCDEVSWQTCDFLKATCEHCGTENLVIEGPTTCGYLPTNAVVKMPCPACQDPEIGPEHSVADYHNHSNIETRLRK…	1Q2W,1QZ8,1UJ1,1UK2,1UK3,1UK4,1UW7,1WOF,1Z1I,2A5A,2A5I,2A5K,2ACF,2AHM,2ALV,2AMD,2AMQ,2BX3,2BX4,2C3S,2D2D,2DUC,2FAV,2FE8,2FYG,2G9T,2GA6,2GDT,2GRI,2GT7,2GT8,2GTB,2GX4,2GZ7,2GZ8,2GZ9,2H2Z,2HOB,2HSX,2IDY,2JZF,2K7X,2K87,2KAF,2LIZ,2OP9,2OZK,2RNK,2V6N,2VJ1,2XYQ,2XYR,2XYV,2Z3C,2Z3D,2Z3E,2Z94,2Z9G,2Z9J,2Z9K,2Z9L,2ZU4,2ZU5,3D62,3E91,3E9S,3EA7,3EA8,3EBN,3IWM,3M3V,3MJ5,3R24,3SN8,3SNA,3SNB,3SNC,3SND,3SNE,3SZN…	Replicase polyprotein 1ab	R1AB_CVHSA	P0C6X7	P59641,Q6WGN0,Q7T697,Q808C0,Q80BV7,Q80BV8,Q80E51
19557	O=C(CC1=NCCS1)c1nccs1	InChI=1S/C8H8N2OS2/c11-6(8-10-2-4-13-8)5-7-9-1-3-12-7/h2,4H,1,3,5H2	GGVYMBBIRKYGKJ-UHFFFAOYSA-N	11312	2-(4,5-dihydro-1,3-thiazol-2-yl)-1-(1,3-thiazol-2-yl)ethan-1-one::Compound 2 analog 23	3C-like proteinase (3CL-PRO)	Human SARS coronavirus		40000							Curated from the literature by BindingDB	10.1021/jm060207o	16913704			Lu, IL; Mahindroo, N; Liang, PH; Peng, YH; Kuo, CJ; Tsai, KC; Hsieh, HP; Chao, YS; Wu, SY	National Defense Medical Center	http://www.bindingdb.org/bind/chemsearch/marvin/MolStructure.jsp?monomerid=11312	http://www.bindingdb.org/jsp/dbsearch/PrimarySearch_ki.jsp?energyterm=kJ/mole&tag=pol&polymerid=4753&target=3C-like+proteinase+%283CL-PRO%29&column=ki&startPg=0&Increment=50&submit=Search	http://www.bindingdb.org/jsp/dbsearch/PrimarySearch_ki.jsp?energyterm=kJ/mole&tag=r21&monomerid=11312&enzyme=3C-like+proteinase+%283CL-PRO%29&column=ki&startPg=0&Increment=50&submit=Search			23644661	46509361						ZINC14947948	1	MESLVLGVNEKTHVQLSLPVLQVRDVLVRGFGDSVEEALSEAREHLKNGTCGLVELEKGVLPQLEQPYVFIKRSDALSTNHGHKVVELVAEMDGIQYGRSGITLGVLVPHVGETPIAYRNVLLRKNGNKGAGGHSYGIDLKSYDLGDELGTDPIEDYEQNWNTKHGSGALRELTRELNGGAVTRYVDNNFCGPDGYPLDCIKDFLARAGKSMCTLSEQLDYIESKRGVYCCRDHEHEIAWFTERSDKSYEHQTPFEIKSAKKFDTFKGECPKFVFPLNSKVKVIQPRVEKKKTEGFMGRIRSVYPVASPQECNNMHLSTLMKCNHCDEVSWQTCDFLKATCEHCGTENLVIEGPTTCGYLPTNAVVKMPCPACQDPEIGPEHSVADYHNHSNIETRLRK…	1Q2W,1QZ8,1UJ1,1UK2,1UK3,1UK4,1UW7,1WOF,1Z1I,2A5A,2A5I,2A5K,2ACF,2AHM,2ALV,2AMD,2AMQ,2BX3,2BX4,2C3S,2D2D,2DUC,2FAV,2FE8,2FYG,2G9T,2GA6,2GDT,2GRI,2GT7,2GT8,2GTB,2GX4,2GZ7,2GZ8,2GZ9,2H2Z,2HOB,2HSX,2IDY,2JZF,2K7X,2K87,2KAF,2LIZ,2OP9,2OZK,2RNK,2V6N,2VJ1,2XYQ,2XYR,2XYV,2Z3C,2Z3D,2Z3E,2Z94,2Z9G,2Z9J,2Z9K,2Z9L,2ZU4,2ZU5,3D62,3E91,3E9S,3EA7,3EA8,3EBN,3IWM,3M3V,3MJ5,3R24,3SN8,3SNA,3SNB,3SNC,3SND,3SNE,3SZN…	Replicase polyprotein 1ab	R1AB_CVHSA	P0C6X7	P59641,Q6WGN0,Q7T697,Q808C0,Q80BV7,Q80BV8,Q80E51
42404	O=C(CSc1nc(nc2ccccc12)C1CCCCC1)NCc1ccco1	InChI=1S/C21H23N3O2S/c25-19(22-13-16-9-6-12-26-16)14-27-21-17-10-4-5-11-18(17)23-20(24-21)15-7-2-1-3-8-15/h4-6,9-12,15H,1-3,7-8,13-14H2,(H,22,25)	TUMJQFRANSTLTQ-UHFFFAOYSA-N	23307	2-[(2-cyclohexylquinazolin-4-yl)sulfanyl]-N-(furan-2-ylmethyl)acetamide::Compound PJ07	3C-like proteinase (3CL-PRO)	Human SARS coronavirus		18200					7.4	25.00 C	Curated from the literature by BindingDB	10.1016/j.bmc.2008.01.011	18343121			Mukherjee, P; Desai, P; Ross, L; White, EL; Avery, MA	University of Mississippi	http://www.bindingdb.org/bind/chemsearch/marvin/MolStructure.jsp?monomerid=23307	http://www.bindingdb.org/jsp/dbsearch/PrimarySearch_ki.jsp?energyterm=kJ/mole&tag=pol&polymerid=4753&target=3C-like+proteinase+%283CL-PRO%29&column=ki&startPg=0&Increment=50&submit=Search	http://www.bindingdb.org/jsp/dbsearch/PrimarySearch_ki.jsp?energyterm=kJ/mole&tag=r21&monomerid=23307&enzyme=3C-like+proteinase+%283CL-PRO%29&column=ki&startPg=0&Increment=50&submit=Search			1465905	50091572						ZINC01376434	1	MESLVLGVNEKTHVQLSLPVLQVRDVLVRGFGDSVEEALSEAREHLKNGTCGLVELEKGVLPQLEQPYVFIKRSDALSTNHGHKVVELVAEMDGIQYGRSGITLGVLVPHVGETPIAYRNVLLRKNGNKGAGGHSYGIDLKSYDLGDELGTDPIEDYEQNWNTKHGSGALRELTRELNGGAVTRYVDNNFCGPDGYPLDCIKDFLARAGKSMCTLSEQLDYIESKRGVYCCRDHEHEIAWFTERSDKSYEHQTPFEIKSAKKFDTFKGECPKFVFPLNSKVKVIQPRVEKKKTEGFMGRIRSVYPVASPQECNNMHLSTLMKCNHCDEVSWQTCDFLKATCEHCGTENLVIEGPTTCGYLPTNAVVKMPCPACQDPEIGPEHSVADYHNHSNIETRLRK…	1Q2W,1QZ8,1UJ1,1UK2,1UK3,1UK4,1UW7,1WOF,1Z1I,2A5A,2A5I,2A5K,2ACF,2AHM,2ALV,2AMD,2AMQ,2BX3,2BX4,2C3S,2D2D,2DUC,2FAV,2FE8,2FYG,2G9T,2GA6,2GDT,2GRI,2GT7,2GT8,2GTB,2GX4,2GZ7,2GZ8,2GZ9,2H2Z,2HOB,2HSX,2IDY,2JZF,2K7X,2K87,2KAF,2LIZ,2OP9,2OZK,2RNK,2V6N,2VJ1,2XYQ,2XYR,2XYV,2Z3C,2Z3D,2Z3E,2Z94,2Z9G,2Z9J,2Z9K,2Z9L,2ZU4,2ZU5,3D62,3E91,3E9S,3EA7,3EA8,3EBN,3IWM,3M3V,3MJ5,3R24,3SN8,3SNA,3SNB,3SNC,3SND,3SNE,3SZN…	Replicase polyprotein 1ab	R1AB_CVHSA	P0C6X7	P59641,Q6WGN0,Q7T697,Q808C0,Q80BV7,Q80BV8,Q80E51
42405	Cc1ccccc1CCN(Cc1cc2cc(C)c(C)cc2[nH]c1=O)C(=O)NCc1ccccc1	InChI=1S/C29H31N3O2/c1-20-9-7-8-12-24(20)13-14-32(29(34)30-18-23-10-5-4-6-11-23)19-26-17-25-15-21(2)22(3)16-27(25)31-28(26)33/h4-12,15-17H,13-14,18-19H2,1-3H3,(H,30,34)(H,31,33)	SQUUVUDFHHMCTC-UHFFFAOYSA-N	23308	3-benzyl-1-[(6,7-dimethyl-2-oxo-1,2-dihydroquinolin-3-yl)methyl]-1-[2-(2-methylphenyl)ethyl]urea::Compound PJ169	3C-like proteinase (3CL-PRO)	Human SARS coronavirus		17200					7.4	25.00 C	Curated from the literature by BindingDB	10.1016/j.bmc.2008.01.011	18343121			Mukherjee, P; Desai, P; Ross, L; White, EL; Avery, MA	University of Mississippi	http://www.bindingdb.org/bind/chemsearch/marvin/MolStructure.jsp?monomerid=23308	http://www.bindingdb.org/jsp/dbsearch/PrimarySearch_ki.jsp?energyterm=kJ/mole&tag=pol&polymerid=4753&target=3C-like+proteinase+%283CL-PRO%29&column=ki&startPg=0&Increment=50&submit=Search	http://www.bindingdb.org/jsp/dbsearch/PrimarySearch_ki.jsp?energyterm=kJ/mole&tag=r21&monomerid=23308&enzyme=3C-like+proteinase+%283CL-PRO%29&column=ki&startPg=0&Increment=50&submit=Search			3194487	50091573						ZINC12704746	1	MESLVLGVNEKTHVQLSLPVLQVRDVLVRGFGDSVEEALSEAREHLKNGTCGLVELEKGVLPQLEQPYVFIKRSDALSTNHGHKVVELVAEMDGIQYGRSGITLGVLVPHVGETPIAYRNVLLRKNGNKGAGGHSYGIDLKSYDLGDELGTDPIEDYEQNWNTKHGSGALRELTRELNGGAVTRYVDNNFCGPDGYPLDCIKDFLARAGKSMCTLSEQLDYIESKRGVYCCRDHEHEIAWFTERSDKSYEHQTPFEIKSAKKFDTFKGECPKFVFPLNSKVKVIQPRVEKKKTEGFMGRIRSVYPVASPQECNNMHLSTLMKCNHCDEVSWQTCDFLKATCEHCGTENLVIEGPTTCGYLPTNAVVKMPCPACQDPEIGPEHSVADYHNHSNIETRLRK…	1Q2W,1QZ8,1UJ1,1UK2,1UK3,1UK4,1UW7,1WOF,1Z1I,2A5A,2A5I,2A5K,2ACF,2AHM,2ALV,2AMD,2AMQ,2BX3,2BX4,2C3S,2D2D,2DUC,2FAV,2FE8,2FYG,2G9T,2GA6,2GDT,2GRI,2GT7,2GT8,2GTB,2GX4,2GZ7,2GZ8,2GZ9,2H2Z,2HOB,2HSX,2IDY,2JZF,2K7X,2K87,2KAF,2LIZ,2OP9,2OZK,2RNK,2V6N,2VJ1,2XYQ,2XYR,2XYV,2Z3C,2Z3D,2Z3E,2Z94,2Z9G,2Z9J,2Z9K,2Z9L,2ZU4,2ZU5,3D62,3E91,3E9S,3EA7,3EA8,3EBN,3IWM,3M3V,3MJ5,3R24,3SN8,3SNA,3SNB,3SNC,3SND,3SNE,3SZN…	Replicase polyprotein 1ab	R1AB_CVHSA	P0C6X7	P59641,Q6WGN0,Q7T697,Q808C0,Q80BV7,Q80BV8,Q80E51
111449	Nc1ccccc1C(=O)On1nnc2ccccc12	InChI=1S/C13H10N4O2/c14-10-6-2-1-5-9(10)13(18)19-17-12-8-4-3-7-11(12)15-16-17/h1-8H,14H2	JPKNQONFNZKKLX-UHFFFAOYSA-N	59237	Benzotriazole ester, 3	3C-like proteinase (3CL-PRO)	Human SARS coronavirus	19.5						7.5		Curated from the literature by BindingDB	10.1016/j.chembiol.2005.12.008	16638531			Wu, CY; King, KY; Kuo, CJ; Fang, JM; Wu, YT; Ho, MY; Liao, CL; Shie, JJ; Liang, PH; Wong, CH	Academia Sinica	http://www.bindingdb.org/bind/chemsearch/marvin/MolStructure.jsp?monomerid=59237	http://www.bindingdb.org/jsp/dbsearch/PrimarySearch_ki.jsp?energyterm=kJ/mole&tag=pol&polymerid=4753&target=3C-like+proteinase+%283CL-PRO%29&column=ki&startPg=0&Increment=50&submit=Search	http://www.bindingdb.org/jsp/dbsearch/PrimarySearch_ki.jsp?energyterm=kJ/mole&tag=r21&monomerid=59237&enzyme=3C-like+proteinase+%283CL-PRO%29&column=ki&startPg=0&Increment=50&submit=Search			15959235	125082203						ZINC59426271	1	MESLVLGVNEKTHVQLSLPVLQVRDVLVRGFGDSVEEALSEAREHLKNGTCGLVELEKGVLPQLEQPYVFIKRSDALSTNHGHKVVELVAEMDGIQYGRSGITLGVLVPHVGETPIAYRNVLLRKNGNKGAGGHSYGIDLKSYDLGDELGTDPIEDYEQNWNTKHGSGALRELTRELNGGAVTRYVDNNFCGPDGYPLDCIKDFLARAGKSMCTLSEQLDYIESKRGVYCCRDHEHEIAWFTERSDKSYEHQTPFEIKSAKKFDTFKGECPKFVFPLNSKVKVIQPRVEKKKTEGFMGRIRSVYPVASPQECNNMHLSTLMKCNHCDEVSWQTCDFLKATCEHCGTENLVIEGPTTCGYLPTNAVVKMPCPACQDPEIGPEHSVADYHNHSNIETRLRK…	1Q2W,1QZ8,1UJ1,1UK2,1UK3,1UK4,1UW7,1WOF,1Z1I,2A5A,2A5I,2A5K,2ACF,2AHM,2ALV,2AMD,2AMQ,2BX3,2BX4,2C3S,2D2D,2DUC,2FAV,2FE8,2FYG,2G9T,2GA6,2GDT,2GRI,2GT7,2GT8,2GTB,2GX4,2GZ7,2GZ8,2GZ9,2H2Z,2HOB,2HSX,2IDY,2JZF,2K7X,2K87,2KAF,2LIZ,2OP9,2OZK,2RNK,2V6N,2VJ1,2XYQ,2XYR,2XYV,2Z3C,2Z3D,2Z3E,2Z94,2Z9G,2Z9J,2Z9K,2Z9L,2ZU4,2ZU5,3D62,3E91,3E9S,3EA7,3EA8,3EBN,3IWM,3M3V,3MJ5,3R24,3SN8,3SNA,3SNB,3SNC,3SND,3SNE,3SZN…	Replicase polyprotein 1ab	R1AB_CVHSA	P0C6X7	P59641,Q6WGN0,Q7T697,Q808C0,Q80BV7,Q80BV8,Q80E51
111450	CN(C)c1ccc(cc1)C(=O)On1nnc2ccccc12	InChI=1S/C15H14N4O2/c1-18(2)12-9-7-11(8-10-12)15(20)21-19-14-6-4-3-5-13(14)16-17-19/h3-10H,1-2H3	UOITWBIZHQLMTH-UHFFFAOYSA-N	59238	Benzotriazole ester, 4	3C-like proteinase (3CL-PRO)	Human SARS coronavirus	17.4						7.5		Curated from the literature by BindingDB	10.1016/j.chembiol.2005.12.008	16638531			Wu, CY; King, KY; Kuo, CJ; Fang, JM; Wu, YT; Ho, MY; Liao, CL; Shie, JJ; Liang, PH; Wong, CH	Academia Sinica	http://www.bindingdb.org/bind/chemsearch/marvin/MolStructure.jsp?monomerid=59238	http://www.bindingdb.org/jsp/dbsearch/PrimarySearch_ki.jsp?energyterm=kJ/mole&tag=pol&polymerid=4753&target=3C-like+proteinase+%283CL-PRO%29&column=ki&startPg=0&Increment=50&submit=Search	http://www.bindingdb.org/jsp/dbsearch/PrimarySearch_ki.jsp?energyterm=kJ/mole&tag=r21&monomerid=59238&enzyme=3C-like+proteinase+%283CL-PRO%29&column=ki&startPg=0&Increment=50&submit=Search			15959236	125082204						ZINC59426275	1	MESLVLGVNEKTHVQLSLPVLQVRDVLVRGFGDSVEEALSEAREHLKNGTCGLVELEKGVLPQLEQPYVFIKRSDALSTNHGHKVVELVAEMDGIQYGRSGITLGVLVPHVGETPIAYRNVLLRKNGNKGAGGHSYGIDLKSYDLGDELGTDPIEDYEQNWNTKHGSGALRELTRELNGGAVTRYVDNNFCGPDGYPLDCIKDFLARAGKSMCTLSEQLDYIESKRGVYCCRDHEHEIAWFTERSDKSYEHQTPFEIKSAKKFDTFKGECPKFVFPLNSKVKVIQPRVEKKKTEGFMGRIRSVYPVASPQECNNMHLSTLMKCNHCDEVSWQTCDFLKATCEHCGTENLVIEGPTTCGYLPTNAVVKMPCPACQDPEIGPEHSVADYHNHSNIETRLRK…	1Q2W,1QZ8,1UJ1,1UK2,1UK3,1UK4,1UW7,1WOF,1Z1I,2A5A,2A5I,2A5K,2ACF,2AHM,2ALV,2AMD,2AMQ,2BX3,2BX4,2C3S,2D2D,2DUC,2FAV,2FE8,2FYG,2G9T,2GA6,2GDT,2GRI,2GT7,2GT8,2GTB,2GX4,2GZ7,2GZ8,2GZ9,2H2Z,2HOB,2HSX,2IDY,2JZF,2K7X,2K87,2KAF,2LIZ,2OP9,2OZK,2RNK,2V6N,2VJ1,2XYQ,2XYR,2XYV,2Z3C,2Z3D,2Z3E,2Z94,2Z9G,2Z9J,2Z9K,2Z9L,2ZU4,2ZU5,3D62,3E91,3E9S,3EA7,3EA8,3EBN,3IWM,3M3V,3MJ5,3R24,3SN8,3SNA,3SNB,3SNC,3SND,3SNE,3SZN…	Replicase polyprotein 1ab	R1AB_CVHSA	P0C6X7	P59641,Q6WGN0,Q7T697,Q808C0,Q80BV7,Q80BV8,Q80E51
111451	CNc1ccc(cc1)C(=O)On1nnc2ccccc12	InChI=1S/C14H12N4O2/c1-15-11-8-6-10(7-9-11)14(19)20-18-13-5-3-2-4-12(13)16-17-18/h2-9,15H,1H3	JXCSDPIXSVMCBQ-UHFFFAOYSA-N	59239	Benzotriazole ester, 5	3C-like proteinase (3CL-PRO)	Human SARS coronavirus	12.1						7.5		Curated from the literature by BindingDB	10.1016/j.chembiol.2005.12.008	16638531			Wu, CY; King, KY; Kuo, CJ; Fang, JM; Wu, YT; Ho, MY; Liao, CL; Shie, JJ; Liang, PH; Wong, CH	Academia Sinica	http://www.bindingdb.org/bind/chemsearch/marvin/MolStructure.jsp?monomerid=59239	http://www.bindingdb.org/jsp/dbsearch/PrimarySearch_ki.jsp?energyterm=kJ/mole&tag=pol&polymerid=4753&target=3C-like+proteinase+%283CL-PRO%29&column=ki&startPg=0&Increment=50&submit=Search	http://www.bindingdb.org/jsp/dbsearch/PrimarySearch_ki.jsp?energyterm=kJ/mole&tag=r21&monomerid=59239&enzyme=3C-like+proteinase+%283CL-PRO%29&column=ki&startPg=0&Increment=50&submit=Search			15959237	125082205						ZINC59426276	1	MESLVLGVNEKTHVQLSLPVLQVRDVLVRGFGDSVEEALSEAREHLKNGTCGLVELEKGVLPQLEQPYVFIKRSDALSTNHGHKVVELVAEMDGIQYGRSGITLGVLVPHVGETPIAYRNVLLRKNGNKGAGGHSYGIDLKSYDLGDELGTDPIEDYEQNWNTKHGSGALRELTRELNGGAVTRYVDNNFCGPDGYPLDCIKDFLARAGKSMCTLSEQLDYIESKRGVYCCRDHEHEIAWFTERSDKSYEHQTPFEIKSAKKFDTFKGECPKFVFPLNSKVKVIQPRVEKKKTEGFMGRIRSVYPVASPQECNNMHLSTLMKCNHCDEVSWQTCDFLKATCEHCGTENLVIEGPTTCGYLPTNAVVKMPCPACQDPEIGPEHSVADYHNHSNIETRLRK…	1Q2W,1QZ8,1UJ1,1UK2,1UK3,1UK4,1UW7,1WOF,1Z1I,2A5A,2A5I,2A5K,2ACF,2AHM,2ALV,2AMD,2AMQ,2BX3,2BX4,2C3S,2D2D,2DUC,2FAV,2FE8,2FYG,2G9T,2GA6,2GDT,2GRI,2GT7,2GT8,2GTB,2GX4,2GZ7,2GZ8,2GZ9,2H2Z,2HOB,2HSX,2IDY,2JZF,2K7X,2K87,2KAF,2LIZ,2OP9,2OZK,2RNK,2V6N,2VJ1,2XYQ,2XYR,2XYV,2Z3C,2Z3D,2Z3E,2Z94,2Z9G,2Z9J,2Z9K,2Z9L,2ZU4,2ZU5,3D62,3E91,3E9S,3EA7,3EA8,3EBN,3IWM,3M3V,3MJ5,3R24,3SN8,3SNA,3SNB,3SNC,3SND,3SNE,3SZN…	Replicase polyprotein 1ab	R1AB_CVHSA	P0C6X7	P59641,Q6WGN0,Q7T697,Q808C0,Q80BV7,Q80BV8,Q80E51
111452	CCN(CC)c1ccc(cc1)C(=O)On1nnc2ccccc12	InChI=1S/C17H18N4O2/c1-3-20(4-2)14-11-9-13(10-12-14)17(22)23-21-16-8-6-5-7-15(16)18-19-21/h5-12H,3-4H2,1-2H3	UMVUTRLLCXJRMI-UHFFFAOYSA-N	59240	Benzotriazole ester, 6	3C-like proteinase (3CL-PRO)	Human SARS coronavirus	11.1						7.5		Curated from the literature by BindingDB	10.1016/j.chembiol.2005.12.008	16638531			Wu, CY; King, KY; Kuo, CJ; Fang, JM; Wu, YT; Ho, MY; Liao, CL; Shie, JJ; Liang, PH; Wong, CH	Academia Sinica	http://www.bindingdb.org/bind/chemsearch/marvin/MolStructure.jsp?monomerid=59240	http://www.bindingdb.org/jsp/dbsearch/PrimarySearch_ki.jsp?energyterm=kJ/mole&tag=pol&polymerid=4753&target=3C-like+proteinase+%283CL-PRO%29&column=ki&startPg=0&Increment=50&submit=Search	http://www.bindingdb.org/jsp/dbsearch/PrimarySearch_ki.jsp?energyterm=kJ/mole&tag=r21&monomerid=59240&enzyme=3C-like+proteinase+%283CL-PRO%29&column=ki&startPg=0&Increment=50&submit=Search			15959238	125082206						ZINC59426278	1	MESLVLGVNEKTHVQLSLPVLQVRDVLVRGFGDSVEEALSEAREHLKNGTCGLVELEKGVLPQLEQPYVFIKRSDALSTNHGHKVVELVAEMDGIQYGRSGITLGVLVPHVGETPIAYRNVLLRKNGNKGAGGHSYGIDLKSYDLGDELGTDPIEDYEQNWNTKHGSGALRELTRELNGGAVTRYVDNNFCGPDGYPLDCIKDFLARAGKSMCTLSEQLDYIESKRGVYCCRDHEHEIAWFTERSDKSYEHQTPFEIKSAKKFDTFKGECPKFVFPLNSKVKVIQPRVEKKKTEGFMGRIRSVYPVASPQECNNMHLSTLMKCNHCDEVSWQTCDFLKATCEHCGTENLVIEGPTTCGYLPTNAVVKMPCPACQDPEIGPEHSVADYHNHSNIETRLRK…	1Q2W,1QZ8,1UJ1,1UK2,1UK3,1UK4,1UW7,1WOF,1Z1I,2A5A,2A5I,2A5K,2ACF,2AHM,2ALV,2AMD,2AMQ,2BX3,2BX4,2C3S,2D2D,2DUC,2FAV,2FE8,2FYG,2G9T,2GA6,2GDT,2GRI,2GT7,2GT8,2GTB,2GX4,2GZ7,2GZ8,2GZ9,2H2Z,2HOB,2HSX,2IDY,2JZF,2K7X,2K87,2KAF,2LIZ,2OP9,2OZK,2RNK,2V6N,2VJ1,2XYQ,2XYR,2XYV,2Z3C,2Z3D,2Z3E,2Z94,2Z9G,2Z9J,2Z9K,2Z9L,2ZU4,2ZU5,3D62,3E91,3E9S,3EA7,3EA8,3EBN,3IWM,3M3V,3MJ5,3R24,3SN8,3SNA,3SNB,3SNC,3SND,3SNE,3SZN…	Replicase polyprotein 1ab	R1AB_CVHSA	P0C6X7	P59641,Q6WGN0,Q7T697,Q808C0,Q80BV7,Q80BV8,Q80E51
111453	O=C(On1nnc2ccccc12)c1ccc2nc[nH]c2c1	InChI=1S/C14H9N5O2/c20-14(9-5-6-10-12(7-9)16-8-15-10)21-19-13-4-2-1-3-11(13)17-18-19/h1-8H,(H,15,16)	ZVXNOBBLRBKRCE-UHFFFAOYSA-N	59241	Benzotriazole ester, 7	3C-like proteinase (3CL-PRO)	Human SARS coronavirus	22.9						7.5		Curated from the literature by BindingDB	10.1016/j.chembiol.2005.12.008	16638531			Wu, CY; King, KY; Kuo, CJ; Fang, JM; Wu, YT; Ho, MY; Liao, CL; Shie, JJ; Liang, PH; Wong, CH	Academia Sinica	http://www.bindingdb.org/bind/chemsearch/marvin/MolStructure.jsp?monomerid=59241	http://www.bindingdb.org/jsp/dbsearch/PrimarySearch_ki.jsp?energyterm=kJ/mole&tag=pol&polymerid=4753&target=3C-like+proteinase+%283CL-PRO%29&column=ki&startPg=0&Increment=50&submit=Search	http://www.bindingdb.org/jsp/dbsearch/PrimarySearch_ki.jsp?energyterm=kJ/mole&tag=r21&monomerid=59241&enzyme=3C-like+proteinase+%283CL-PRO%29&column=ki&startPg=0&Increment=50&submit=Search			15959239	125082207						ZINC59426280	1	MESLVLGVNEKTHVQLSLPVLQVRDVLVRGFGDSVEEALSEAREHLKNGTCGLVELEKGVLPQLEQPYVFIKRSDALSTNHGHKVVELVAEMDGIQYGRSGITLGVLVPHVGETPIAYRNVLLRKNGNKGAGGHSYGIDLKSYDLGDELGTDPIEDYEQNWNTKHGSGALRELTRELNGGAVTRYVDNNFCGPDGYPLDCIKDFLARAGKSMCTLSEQLDYIESKRGVYCCRDHEHEIAWFTERSDKSYEHQTPFEIKSAKKFDTFKGECPKFVFPLNSKVKVIQPRVEKKKTEGFMGRIRSVYPVASPQECNNMHLSTLMKCNHCDEVSWQTCDFLKATCEHCGTENLVIEGPTTCGYLPTNAVVKMPCPACQDPEIGPEHSVADYHNHSNIETRLRK…	1Q2W,1QZ8,1UJ1,1UK2,1UK3,1UK4,1UW7,1WOF,1Z1I,2A5A,2A5I,2A5K,2ACF,2AHM,2ALV,2AMD,2AMQ,2BX3,2BX4,2C3S,2D2D,2DUC,2FAV,2FE8,2FYG,2G9T,2GA6,2GDT,2GRI,2GT7,2GT8,2GTB,2GX4,2GZ7,2GZ8,2GZ9,2H2Z,2HOB,2HSX,2IDY,2JZF,2K7X,2K87,2KAF,2LIZ,2OP9,2OZK,2RNK,2V6N,2VJ1,2XYQ,2XYR,2XYV,2Z3C,2Z3D,2Z3E,2Z94,2Z9G,2Z9J,2Z9K,2Z9L,2ZU4,2ZU5,3D62,3E91,3E9S,3EA7,3EA8,3EBN,3IWM,3M3V,3MJ5,3R24,3SN8,3SNA,3SNB,3SNC,3SND,3SNE,3SZN…	Replicase polyprotein 1ab	R1AB_CVHSA	P0C6X7	P59641,Q6WGN0,Q7T697,Q808C0,Q80BV7,Q80BV8,Q80E51
111454	O=C(On1nnc2ccccc12)c1ccc2[nH]ccc2c1	InChI=1S/C15H10N4O2/c20-15(11-5-6-12-10(9-11)7-8-16-12)21-19-14-4-2-1-3-13(14)17-18-19/h1-9,16H	YPFWNRLSYPAVJB-UHFFFAOYSA-N	59242	Benzotriazole ester, 8	3C-like proteinase (3CL-PRO)	Human SARS coronavirus	7.5						7.5		Curated from the literature by BindingDB	10.1016/j.chembiol.2005.12.008	16638531			Wu, CY; King, KY; Kuo, CJ; Fang, JM; Wu, YT; Ho, MY; Liao, CL; Shie, JJ; Liang, PH; Wong, CH	Academia Sinica	http://www.bindingdb.org/bind/chemsearch/marvin/MolStructure.jsp?monomerid=59242	http://www.bindingdb.org/jsp/dbsearch/PrimarySearch_ki.jsp?energyterm=kJ/mole&tag=pol&polymerid=4753&target=3C-like+proteinase+%283CL-PRO%29&column=ki&startPg=0&Increment=50&submit=Search	http://www.bindingdb.org/jsp/dbsearch/PrimarySearch_ki.jsp?energyterm=kJ/mole&tag=r21&monomerid=59242&enzyme=3C-like+proteinase+%283CL-PRO%29&column=ki&startPg=0&Increment=50&submit=Search			15959240	125082208						ZINC49888654	1	MESLVLGVNEKTHVQLSLPVLQVRDVLVRGFGDSVEEALSEAREHLKNGTCGLVELEKGVLPQLEQPYVFIKRSDALSTNHGHKVVELVAEMDGIQYGRSGITLGVLVPHVGETPIAYRNVLLRKNGNKGAGGHSYGIDLKSYDLGDELGTDPIEDYEQNWNTKHGSGALRELTRELNGGAVTRYVDNNFCGPDGYPLDCIKDFLARAGKSMCTLSEQLDYIESKRGVYCCRDHEHEIAWFTERSDKSYEHQTPFEIKSAKKFDTFKGECPKFVFPLNSKVKVIQPRVEKKKTEGFMGRIRSVYPVASPQECNNMHLSTLMKCNHCDEVSWQTCDFLKATCEHCGTENLVIEGPTTCGYLPTNAVVKMPCPACQDPEIGPEHSVADYHNHSNIETRLRK…	1Q2W,1QZ8,1UJ1,1UK2,1UK3,1UK4,1UW7,1WOF,1Z1I,2A5A,2A5I,2A5K,2ACF,2AHM,2ALV,2AMD,2AMQ,2BX3,2BX4,2C3S,2D2D,2DUC,2FAV,2FE8,2FYG,2G9T,2GA6,2GDT,2GRI,2GT7,2GT8,2GTB,2GX4,2GZ7,2GZ8,2GZ9,2H2Z,2HOB,2HSX,2IDY,2JZF,2K7X,2K87,2KAF,2LIZ,2OP9,2OZK,2RNK,2V6N,2VJ1,2XYQ,2XYR,2XYV,2Z3C,2Z3D,2Z3E,2Z94,2Z9G,2Z9J,2Z9K,2Z9L,2ZU4,2ZU5,3D62,3E91,3E9S,3EA7,3EA8,3EBN,3IWM,3M3V,3MJ5,3R24,3SN8,3SNA,3SNB,3SNC,3SND,3SNE,3SZN…	Replicase polyprotein 1ab	R1AB_CVHSA	P0C6X7	P59641,Q6WGN0,Q7T697,Q808C0,Q80BV7,Q80BV8,Q80E51
111455	O=C(On1nnc2ccccc12)c1cc2ccccc2[nH]1	InChI=1S/C15H10N4O2/c20-15(13-9-10-5-1-2-6-11(10)16-13)21-19-14-8-4-3-7-12(14)17-18-19/h1-9,16H	ZDPADJJUIZEJSZ-UHFFFAOYSA-N	59243	Benzotriazole ester, 9	3C-like proteinase (3CL-PRO)	Human SARS coronavirus	12.3						7.5		Curated from the literature by BindingDB	10.1016/j.chembiol.2005.12.008	16638531			Wu, CY; King, KY; Kuo, CJ; Fang, JM; Wu, YT; Ho, MY; Liao, CL; Shie, JJ; Liang, PH; Wong, CH	Academia Sinica	http://www.bindingdb.org/bind/chemsearch/marvin/MolStructure.jsp?monomerid=59243	http://www.bindingdb.org/jsp/dbsearch/PrimarySearch_ki.jsp?energyterm=kJ/mole&tag=pol&polymerid=4753&target=3C-like+proteinase+%283CL-PRO%29&column=ki&startPg=0&Increment=50&submit=Search	http://www.bindingdb.org/jsp/dbsearch/PrimarySearch_ki.jsp?energyterm=kJ/mole&tag=r21&monomerid=59243&enzyme=3C-like+proteinase+%283CL-PRO%29&column=ki&startPg=0&Increment=50&submit=Search			15959241	125082209						ZINC59426283	1	MESLVLGVNEKTHVQLSLPVLQVRDVLVRGFGDSVEEALSEAREHLKNGTCGLVELEKGVLPQLEQPYVFIKRSDALSTNHGHKVVELVAEMDGIQYGRSGITLGVLVPHVGETPIAYRNVLLRKNGNKGAGGHSYGIDLKSYDLGDELGTDPIEDYEQNWNTKHGSGALRELTRELNGGAVTRYVDNNFCGPDGYPLDCIKDFLARAGKSMCTLSEQLDYIESKRGVYCCRDHEHEIAWFTERSDKSYEHQTPFEIKSAKKFDTFKGECPKFVFPLNSKVKVIQPRVEKKKTEGFMGRIRSVYPVASPQECNNMHLSTLMKCNHCDEVSWQTCDFLKATCEHCGTENLVIEGPTTCGYLPTNAVVKMPCPACQDPEIGPEHSVADYHNHSNIETRLRK…	1Q2W,1QZ8,1UJ1,1UK2,1UK3,1UK4,1UW7,1WOF,1Z1I,2A5A,2A5I,2A5K,2ACF,2AHM,2ALV,2AMD,2AMQ,2BX3,2BX4,2C3S,2D2D,2DUC,2FAV,2FE8,2FYG,2G9T,2GA6,2GDT,2GRI,2GT7,2GT8,2GTB,2GX4,2GZ7,2GZ8,2GZ9,2H2Z,2HOB,2HSX,2IDY,2JZF,2K7X,2K87,2KAF,2LIZ,2OP9,2OZK,2RNK,2V6N,2VJ1,2XYQ,2XYR,2XYV,2Z3C,2Z3D,2Z3E,2Z94,2Z9G,2Z9J,2Z9K,2Z9L,2ZU4,2ZU5,3D62,3E91,3E9S,3EA7,3EA8,3EBN,3IWM,3M3V,3MJ5,3R24,3SN8,3SNA,3SNB,3SNC,3SND,3SNE,3SZN…	Replicase polyprotein 1ab	R1AB_CVHSA	P0C6X7	P59641,Q6WGN0,Q7T697,Q808C0,Q80BV7,Q80BV8,Q80E51
111456	Fc1ccc2[nH]c(cc2c1)C(=O)On1nnc2ccccc12	InChI=1S/C15H9FN4O2/c16-10-5-6-11-9(7-10)8-13(17-11)15(21)22-20-14-4-2-1-3-12(14)18-19-20/h1-8,17H	PAEPADFRKKOUIH-UHFFFAOYSA-N	59244	Benzotriazole ester, 10	3C-like proteinase (3CL-PRO)	Human SARS coronavirus	13.8						7.5		Curated from the literature by BindingDB	10.1016/j.chembiol.2005.12.008	16638531			Wu, CY; King, KY; Kuo, CJ; Fang, JM; Wu, YT; Ho, MY; Liao, CL; Shie, JJ; Liang, PH; Wong, CH	Academia Sinica	http://www.bindingdb.org/bind/chemsearch/marvin/MolStructure.jsp?monomerid=59244	http://www.bindingdb.org/jsp/dbsearch/PrimarySearch_ki.jsp?energyterm=kJ/mole&tag=pol&polymerid=4753&target=3C-like+proteinase+%283CL-PRO%29&column=ki&startPg=0&Increment=50&submit=Search	http://www.bindingdb.org/jsp/dbsearch/PrimarySearch_ki.jsp?energyterm=kJ/mole&tag=r21&monomerid=59244&enzyme=3C-like+proteinase+%283CL-PRO%29&column=ki&startPg=0&Increment=50&submit=Search			15959242	125082210						ZINC59426284	1	MESLVLGVNEKTHVQLSLPVLQVRDVLVRGFGDSVEEALSEAREHLKNGTCGLVELEKGVLPQLEQPYVFIKRSDALSTNHGHKVVELVAEMDGIQYGRSGITLGVLVPHVGETPIAYRNVLLRKNGNKGAGGHSYGIDLKSYDLGDELGTDPIEDYEQNWNTKHGSGALRELTRELNGGAVTRYVDNNFCGPDGYPLDCIKDFLARAGKSMCTLSEQLDYIESKRGVYCCRDHEHEIAWFTERSDKSYEHQTPFEIKSAKKFDTFKGECPKFVFPLNSKVKVIQPRVEKKKTEGFMGRIRSVYPVASPQECNNMHLSTLMKCNHCDEVSWQTCDFLKATCEHCGTENLVIEGPTTCGYLPTNAVVKMPCPACQDPEIGPEHSVADYHNHSNIETRLRK…	1Q2W,1QZ8,1UJ1,1UK2,1UK3,1UK4,1UW7,1WOF,1Z1I,2A5A,2A5I,2A5K,2ACF,2AHM,2ALV,2AMD,2AMQ,2BX3,2BX4,2C3S,2D2D,2DUC,2FAV,2FE8,2FYG,2G9T,2GA6,2GDT,2GRI,2GT7,2GT8,2GTB,2GX4,2GZ7,2GZ8,2GZ9,2H2Z,2HOB,2HSX,2IDY,2JZF,2K7X,2K87,2KAF,2LIZ,2OP9,2OZK,2RNK,2V6N,2VJ1,2XYQ,2XYR,2XYV,2Z3C,2Z3D,2Z3E,2Z94,2Z9G,2Z9J,2Z9K,2Z9L,2ZU4,2ZU5,3D62,3E91,3E9S,3EA7,3EA8,3EBN,3IWM,3M3V,3MJ5,3R24,3SN8,3SNA,3SNB,3SNC,3SND,3SNE,3SZN…	Replicase polyprotein 1ab	R1AB_CVHSA	P0C6X7	P59641,Q6WGN0,Q7T697,Q808C0,Q80BV7,Q80BV8,Q80E51
111457	O=C(Cn1nnc2ccccc12)c1ccc(cc1)N(=O)=O	InChI=1S/C14H10N4O3/c19-14(10-5-7-11(8-6-10)18(20)21)9-17-13-4-2-1-3-12(13)15-16-17/h1-8H,9H2	XJLCWAVWERRVAR-UHFFFAOYSA-N	59245	Benzotriazole ester, 13	3C-like proteinase (3CL-PRO)	Human SARS coronavirus		>5.0e+4					7.5		Curated from the literature by BindingDB	10.1016/j.chembiol.2005.12.008	16638531			Wu, CY; King, KY; Kuo, CJ; Fang, JM; Wu, YT; Ho, MY; Liao, CL; Shie, JJ; Liang, PH; Wong, CH	Academia Sinica	http://www.bindingdb.org/bind/chemsearch/marvin/MolStructure.jsp?monomerid=59245	http://www.bindingdb.org/jsp/dbsearch/PrimarySearch_ki.jsp?energyterm=kJ/mole&tag=pol&polymerid=4753&target=3C-like+proteinase+%283CL-PRO%29&column=ki&startPg=0&Increment=50&submit=Search	http://www.bindingdb.org/jsp/dbsearch/PrimarySearch_ki.jsp?energyterm=kJ/mole&tag=r21&monomerid=59245&enzyme=3C-like+proteinase+%283CL-PRO%29&column=ki&startPg=0&Increment=50&submit=Search			677493	125082211					C06058	ZINC00041168	1	MESLVLGVNEKTHVQLSLPVLQVRDVLVRGFGDSVEEALSEAREHLKNGTCGLVELEKGVLPQLEQPYVFIKRSDALSTNHGHKVVELVAEMDGIQYGRSGITLGVLVPHVGETPIAYRNVLLRKNGNKGAGGHSYGIDLKSYDLGDELGTDPIEDYEQNWNTKHGSGALRELTRELNGGAVTRYVDNNFCGPDGYPLDCIKDFLARAGKSMCTLSEQLDYIESKRGVYCCRDHEHEIAWFTERSDKSYEHQTPFEIKSAKKFDTFKGECPKFVFPLNSKVKVIQPRVEKKKTEGFMGRIRSVYPVASPQECNNMHLSTLMKCNHCDEVSWQTCDFLKATCEHCGTENLVIEGPTTCGYLPTNAVVKMPCPACQDPEIGPEHSVADYHNHSNIETRLRK…	1Q2W,1QZ8,1UJ1,1UK2,1UK3,1UK4,1UW7,1WOF,1Z1I,2A5A,2A5I,2A5K,2ACF,2AHM,2ALV,2AMD,2AMQ,2BX3,2BX4,2C3S,2D2D,2DUC,2FAV,2FE8,2FYG,2G9T,2GA6,2GDT,2GRI,2GT7,2GT8,2GTB,2GX4,2GZ7,2GZ8,2GZ9,2H2Z,2HOB,2HSX,2IDY,2JZF,2K7X,2K87,2KAF,2LIZ,2OP9,2OZK,2RNK,2V6N,2VJ1,2XYQ,2XYR,2XYV,2Z3C,2Z3D,2Z3E,2Z94,2Z9G,2Z9J,2Z9K,2Z9L,2ZU4,2ZU5,3D62,3E91,3E9S,3EA7,3EA8,3EBN,3IWM,3M3V,3MJ5,3R24,3SN8,3SNA,3SNB,3SNC,3SND,3SNE,3SZN…	Replicase polyprotein 1ab	R1AB_CVHSA	P0C6X7	P59641,Q6WGN0,Q7T697,Q808C0,Q80BV7,Q80BV8,Q80E51
111458	CCN(CC)c1ccc(cc1)C(=O)Cn1nnc2ccccc12	InChI=1S/C18H20N4O/c1-3-21(4-2)15-11-9-14(10-12-15)18(23)13-22-17-8-6-5-7-16(17)19-20-22/h5-12H,3-4,13H2,1-2H3	WRMOHNVAGALKPX-UHFFFAOYSA-N	59246	Benzotriazole ester, 14	3C-like proteinase (3CL-PRO)	Human SARS coronavirus	1000						7.5		Curated from the literature by BindingDB	10.1016/j.chembiol.2005.12.008	16638531			Wu, CY; King, KY; Kuo, CJ; Fang, JM; Wu, YT; Ho, MY; Liao, CL; Shie, JJ; Liang, PH; Wong, CH	Academia Sinica	http://www.bindingdb.org/bind/chemsearch/marvin/MolStructure.jsp?monomerid=59246	http://www.bindingdb.org/jsp/dbsearch/PrimarySearch_ki.jsp?energyterm=kJ/mole&tag=pol&polymerid=4753&target=3C-like+proteinase+%283CL-PRO%29&column=ki&startPg=0&Increment=50&submit=Search	http://www.bindingdb.org/jsp/dbsearch/PrimarySearch_ki.jsp?energyterm=kJ/mole&tag=r21&monomerid=59246&enzyme=3C-like+proteinase+%283CL-PRO%29&column=ki&startPg=0&Increment=50&submit=Search			15959243	125082212						ZINC34821662	1	MESLVLGVNEKTHVQLSLPVLQVRDVLVRGFGDSVEEALSEAREHLKNGTCGLVELEKGVLPQLEQPYVFIKRSDALSTNHGHKVVELVAEMDGIQYGRSGITLGVLVPHVGETPIAYRNVLLRKNGNKGAGGHSYGIDLKSYDLGDELGTDPIEDYEQNWNTKHGSGALRELTRELNGGAVTRYVDNNFCGPDGYPLDCIKDFLARAGKSMCTLSEQLDYIESKRGVYCCRDHEHEIAWFTERSDKSYEHQTPFEIKSAKKFDTFKGECPKFVFPLNSKVKVIQPRVEKKKTEGFMGRIRSVYPVASPQECNNMHLSTLMKCNHCDEVSWQTCDFLKATCEHCGTENLVIEGPTTCGYLPTNAVVKMPCPACQDPEIGPEHSVADYHNHSNIETRLRK…	1Q2W,1QZ8,1UJ1,1UK2,1UK3,1UK4,1UW7,1WOF,1Z1I,2A5A,2A5I,2A5K,2ACF,2AHM,2ALV,2AMD,2AMQ,2BX3,2BX4,2C3S,2D2D,2DUC,2FAV,2FE8,2FYG,2G9T,2GA6,2GDT,2GRI,2GT7,2GT8,2GTB,2GX4,2GZ7,2GZ8,2GZ9,2H2Z,2HOB,2HSX,2IDY,2JZF,2K7X,2K87,2KAF,2LIZ,2OP9,2OZK,2RNK,2V6N,2VJ1,2XYQ,2XYR,2XYV,2Z3C,2Z3D,2Z3E,2Z94,2Z9G,2Z9J,2Z9K,2Z9L,2ZU4,2ZU5,3D62,3E91,3E9S,3EA7,3EA8,3EBN,3IWM,3M3V,3MJ5,3R24,3SN8,3SNA,3SNB,3SNC,3SND,3SNE,3SZN…	Replicase polyprotein 1ab	R1AB_CVHSA	P0C6X7	P59641,Q6WGN0,Q7T697,Q808C0,Q80BV7,Q80BV8,Q80E51
111459	Nc1ccc(cc1)C(=O)Cn1nnc2ccccc12	InChI=1S/C14H12N4O/c15-11-7-5-10(6-8-11)14(19)9-18-13-4-2-1-3-12(13)16-17-18/h1-8H,9,15H2	PPIIXUVTRPOFDW-UHFFFAOYSA-N	59247	Benzotriazole ester, 15	3C-like proteinase (3CL-PRO)	Human SARS coronavirus		>5.0e+4					7.5		Curated from the literature by BindingDB	10.1016/j.chembiol.2005.12.008	16638531			Wu, CY; King, KY; Kuo, CJ; Fang, JM; Wu, YT; Ho, MY; Liao, CL; Shie, JJ; Liang, PH; Wong, CH	Academia Sinica	http://www.bindingdb.org/bind/chemsearch/marvin/MolStructure.jsp?monomerid=59247	http://www.bindingdb.org/jsp/dbsearch/PrimarySearch_ki.jsp?energyterm=kJ/mole&tag=pol&polymerid=4753&target=3C-like+proteinase+%283CL-PRO%29&column=ki&startPg=0&Increment=50&submit=Search	http://www.bindingdb.org/jsp/dbsearch/PrimarySearch_ki.jsp?energyterm=kJ/mole&tag=r21&monomerid=59247&enzyme=3C-like+proteinase+%283CL-PRO%29&column=ki&startPg=0&Increment=50&submit=Search			15959244	125082213						ZINC34821664	1	MESLVLGVNEKTHVQLSLPVLQVRDVLVRGFGDSVEEALSEAREHLKNGTCGLVELEKGVLPQLEQPYVFIKRSDALSTNHGHKVVELVAEMDGIQYGRSGITLGVLVPHVGETPIAYRNVLLRKNGNKGAGGHSYGIDLKSYDLGDELGTDPIEDYEQNWNTKHGSGALRELTRELNGGAVTRYVDNNFCGPDGYPLDCIKDFLARAGKSMCTLSEQLDYIESKRGVYCCRDHEHEIAWFTERSDKSYEHQTPFEIKSAKKFDTFKGECPKFVFPLNSKVKVIQPRVEKKKTEGFMGRIRSVYPVASPQECNNMHLSTLMKCNHCDEVSWQTCDFLKATCEHCGTENLVIEGPTTCGYLPTNAVVKMPCPACQDPEIGPEHSVADYHNHSNIETRLRK…	1Q2W,1QZ8,1UJ1,1UK2,1UK3,1UK4,1UW7,1WOF,1Z1I,2A5A,2A5I,2A5K,2ACF,2AHM,2ALV,2AMD,2AMQ,2BX3,2BX4,2C3S,2D2D,2DUC,2FAV,2FE8,2FYG,2G9T,2GA6,2GDT,2GRI,2GT7,2GT8,2GTB,2GX4,2GZ7,2GZ8,2GZ9,2H2Z,2HOB,2HSX,2IDY,2JZF,2K7X,2K87,2KAF,2LIZ,2OP9,2OZK,2RNK,2V6N,2VJ1,2XYQ,2XYR,2XYV,2Z3C,2Z3D,2Z3E,2Z94,2Z9G,2Z9J,2Z9K,2Z9L,2ZU4,2ZU5,3D62,3E91,3E9S,3EA7,3EA8,3EBN,3IWM,3M3V,3MJ5,3R24,3SN8,3SNA,3SNB,3SNC,3SND,3SNE,3SZN…	Replicase polyprotein 1ab	R1AB_CVHSA	P0C6X7	P59641,Q6WGN0,Q7T697,Q808C0,Q80BV7,Q80BV8,Q80E51
111460	Nc1ccc(cc1)C(O)Cn1nnc2ccccc12	InChI=1/C14H14N4O/c15-11-7-5-10(6-8-11)14(19)9-18-13-4-2-1-3-12(13)16-17-18/h1-8,14,19H,9,15H2	OBFQUALJHCJLCJ-UHFFFAOYNA-N	59248	Benzotriazole ester, 16	3C-like proteinase (3CL-PRO)	Human SARS coronavirus		>5.0e+4					7.5		Curated from the literature by BindingDB	10.1016/j.chembiol.2005.12.008	16638531			Wu, CY; King, KY; Kuo, CJ; Fang, JM; Wu, YT; Ho, MY; Liao, CL; Shie, JJ; Liang, PH; Wong, CH	Academia Sinica	http://www.bindingdb.org/bind/chemsearch/marvin/MolStructure.jsp?monomerid=59248	http://www.bindingdb.org/jsp/dbsearch/PrimarySearch_ki.jsp?energyterm=kJ/mole&tag=pol&polymerid=4753&target=3C-like+proteinase+%283CL-PRO%29&column=ki&startPg=0&Increment=50&submit=Search	http://www.bindingdb.org/jsp/dbsearch/PrimarySearch_ki.jsp?energyterm=kJ/mole&tag=r21&monomerid=59248&enzyme=3C-like+proteinase+%283CL-PRO%29&column=ki&startPg=0&Increment=50&submit=Search			15959245	125082214						ZINC34821668	1	MESLVLGVNEKTHVQLSLPVLQVRDVLVRGFGDSVEEALSEAREHLKNGTCGLVELEKGVLPQLEQPYVFIKRSDALSTNHGHKVVELVAEMDGIQYGRSGITLGVLVPHVGETPIAYRNVLLRKNGNKGAGGHSYGIDLKSYDLGDELGTDPIEDYEQNWNTKHGSGALRELTRELNGGAVTRYVDNNFCGPDGYPLDCIKDFLARAGKSMCTLSEQLDYIESKRGVYCCRDHEHEIAWFTERSDKSYEHQTPFEIKSAKKFDTFKGECPKFVFPLNSKVKVIQPRVEKKKTEGFMGRIRSVYPVASPQECNNMHLSTLMKCNHCDEVSWQTCDFLKATCEHCGTENLVIEGPTTCGYLPTNAVVKMPCPACQDPEIGPEHSVADYHNHSNIETRLRK…	1Q2W,1QZ8,1UJ1,1UK2,1UK3,1UK4,1UW7,1WOF,1Z1I,2A5A,2A5I,2A5K,2ACF,2AHM,2ALV,2AMD,2AMQ,2BX3,2BX4,2C3S,2D2D,2DUC,2FAV,2FE8,2FYG,2G9T,2GA6,2GDT,2GRI,2GT7,2GT8,2GTB,2GX4,2GZ7,2GZ8,2GZ9,2H2Z,2HOB,2HSX,2IDY,2JZF,2K7X,2K87,2KAF,2LIZ,2OP9,2OZK,2RNK,2V6N,2VJ1,2XYQ,2XYR,2XYV,2Z3C,2Z3D,2Z3E,2Z94,2Z9G,2Z9J,2Z9K,2Z9L,2ZU4,2ZU5,3D62,3E91,3E9S,3EA7,3EA8,3EBN,3IWM,3M3V,3MJ5,3R24,3SN8,3SNA,3SNB,3SNC,3SND,3SNE,3SZN…	Replicase polyprotein 1ab	R1AB_CVHSA	P0C6X7	P59641,Q6WGN0,Q7T697,Q808C0,Q80BV7,Q80BV8,Q80E51
111461	CNc1ccc(cc1)C(=O)Cn1nnc2ccccc12	InChI=1S/C15H14N4O/c1-16-12-8-6-11(7-9-12)15(20)10-19-14-5-3-2-4-13(14)17-18-19/h2-9,16H,10H2,1H3	VMXNOKTVCNUECJ-UHFFFAOYSA-N	59249	Benzotriazole ester, 17	3C-like proteinase (3CL-PRO)	Human SARS coronavirus	4500						7.5		Curated from the literature by BindingDB	10.1016/j.chembiol.2005.12.008	16638531			Wu, CY; King, KY; Kuo, CJ; Fang, JM; Wu, YT; Ho, MY; Liao, CL; Shie, JJ; Liang, PH; Wong, CH	Academia Sinica	http://www.bindingdb.org/bind/chemsearch/marvin/MolStructure.jsp?monomerid=59249	http://www.bindingdb.org/jsp/dbsearch/PrimarySearch_ki.jsp?energyterm=kJ/mole&tag=pol&polymerid=4753&target=3C-like+proteinase+%283CL-PRO%29&column=ki&startPg=0&Increment=50&submit=Search	http://www.bindingdb.org/jsp/dbsearch/PrimarySearch_ki.jsp?energyterm=kJ/mole&tag=r21&monomerid=59249&enzyme=3C-like+proteinase+%283CL-PRO%29&column=ki&startPg=0&Increment=50&submit=Search			15959246	125082215						ZINC34821670	1	MESLVLGVNEKTHVQLSLPVLQVRDVLVRGFGDSVEEALSEAREHLKNGTCGLVELEKGVLPQLEQPYVFIKRSDALSTNHGHKVVELVAEMDGIQYGRSGITLGVLVPHVGETPIAYRNVLLRKNGNKGAGGHSYGIDLKSYDLGDELGTDPIEDYEQNWNTKHGSGALRELTRELNGGAVTRYVDNNFCGPDGYPLDCIKDFLARAGKSMCTLSEQLDYIESKRGVYCCRDHEHEIAWFTERSDKSYEHQTPFEIKSAKKFDTFKGECPKFVFPLNSKVKVIQPRVEKKKTEGFMGRIRSVYPVASPQECNNMHLSTLMKCNHCDEVSWQTCDFLKATCEHCGTENLVIEGPTTCGYLPTNAVVKMPCPACQDPEIGPEHSVADYHNHSNIETRLRK…	1Q2W,1QZ8,1UJ1,1UK2,1UK3,1UK4,1UW7,1WOF,1Z1I,2A5A,2A5I,2A5K,2ACF,2AHM,2ALV,2AMD,2AMQ,2BX3,2BX4,2C3S,2D2D,2DUC,2FAV,2FE8,2FYG,2G9T,2GA6,2GDT,2GRI,2GT7,2GT8,2GTB,2GX4,2GZ7,2GZ8,2GZ9,2H2Z,2HOB,2HSX,2IDY,2JZF,2K7X,2K87,2KAF,2LIZ,2OP9,2OZK,2RNK,2V6N,2VJ1,2XYQ,2XYR,2XYV,2Z3C,2Z3D,2Z3E,2Z94,2Z9G,2Z9J,2Z9K,2Z9L,2ZU4,2ZU5,3D62,3E91,3E9S,3EA7,3EA8,3EBN,3IWM,3M3V,3MJ5,3R24,3SN8,3SNA,3SNB,3SNC,3SND,3SNE,3SZN…	Replicase polyprotein 1ab	R1AB_CVHSA	P0C6X7	P59641,Q6WGN0,Q7T697,Q808C0,Q80BV7,Q80BV8,Q80E51
111462	CN(C)c1ccc(cc1)C(=O)Cn1nnc2ccccc12	InChI=1S/C16H16N4O/c1-19(2)13-9-7-12(8-10-13)16(21)11-20-15-6-4-3-5-14(15)17-18-20/h3-10H,11H2,1-2H3	ARWVNIIKICSUOA-UHFFFAOYSA-N	59250	Benzotriazole ester, 18	3C-like proteinase (3CL-PRO)	Human SARS coronavirus	6700						7.5		Curated from the literature by BindingDB	10.1016/j.chembiol.2005.12.008	16638531			Wu, CY; King, KY; Kuo, CJ; Fang, JM; Wu, YT; Ho, MY; Liao, CL; Shie, JJ; Liang, PH; Wong, CH	Academia Sinica	http://www.bindingdb.org/bind/chemsearch/marvin/MolStructure.jsp?monomerid=59250	http://www.bindingdb.org/jsp/dbsearch/PrimarySearch_ki.jsp?energyterm=kJ/mole&tag=pol&polymerid=4753&target=3C-like+proteinase+%283CL-PRO%29&column=ki&startPg=0&Increment=50&submit=Search	http://www.bindingdb.org/jsp/dbsearch/PrimarySearch_ki.jsp?energyterm=kJ/mole&tag=r21&monomerid=59250&enzyme=3C-like+proteinase+%283CL-PRO%29&column=ki&startPg=0&Increment=50&submit=Search			15959247	125082216						ZINC34821672	1	MESLVLGVNEKTHVQLSLPVLQVRDVLVRGFGDSVEEALSEAREHLKNGTCGLVELEKGVLPQLEQPYVFIKRSDALSTNHGHKVVELVAEMDGIQYGRSGITLGVLVPHVGETPIAYRNVLLRKNGNKGAGGHSYGIDLKSYDLGDELGTDPIEDYEQNWNTKHGSGALRELTRELNGGAVTRYVDNNFCGPDGYPLDCIKDFLARAGKSMCTLSEQLDYIESKRGVYCCRDHEHEIAWFTERSDKSYEHQTPFEIKSAKKFDTFKGECPKFVFPLNSKVKVIQPRVEKKKTEGFMGRIRSVYPVASPQECNNMHLSTLMKCNHCDEVSWQTCDFLKATCEHCGTENLVIEGPTTCGYLPTNAVVKMPCPACQDPEIGPEHSVADYHNHSNIETRLRK…	1Q2W,1QZ8,1UJ1,1UK2,1UK3,1UK4,1UW7,1WOF,1Z1I,2A5A,2A5I,2A5K,2ACF,2AHM,2ALV,2AMD,2AMQ,2BX3,2BX4,2C3S,2D2D,2DUC,2FAV,2FE8,2FYG,2G9T,2GA6,2GDT,2GRI,2GT7,2GT8,2GTB,2GX4,2GZ7,2GZ8,2GZ9,2H2Z,2HOB,2HSX,2IDY,2JZF,2K7X,2K87,2KAF,2LIZ,2OP9,2OZK,2RNK,2V6N,2VJ1,2XYQ,2XYR,2XYV,2Z3C,2Z3D,2Z3E,2Z94,2Z9G,2Z9J,2Z9K,2Z9L,2ZU4,2ZU5,3D62,3E91,3E9S,3EA7,3EA8,3EBN,3IWM,3M3V,3MJ5,3R24,3SN8,3SNA,3SNB,3SNC,3SND,3SNE,3SZN…	Replicase polyprotein 1ab	R1AB_CVHSA	P0C6X7	P59641,Q6WGN0,Q7T697,Q808C0,Q80BV7,Q80BV8,Q80E51
111463	CNc1ccc(cc1)C(O)Cn1nnc2ccccc12	InChI=1/C15H16N4O/c1-16-12-8-6-11(7-9-12)15(20)10-19-14-5-3-2-4-13(14)17-18-19/h2-9,15-16,20H,10H2,1H3	BZISPZAAVWUUHC-UHFFFAOYNA-N	59251	Benzotriazole ester, 19	3C-like proteinase (3CL-PRO)	Human SARS coronavirus	>5.0e+4						7.5		Curated from the literature by BindingDB	10.1016/j.chembiol.2005.12.008	16638531			Wu, CY; King, KY; Kuo, CJ; Fang, JM; Wu, YT; Ho, MY; Liao, CL; Shie, JJ; Liang, PH; Wong, CH	Academia Sinica	http://www.bindingdb.org/bind/chemsearch/marvin/MolStructure.jsp?monomerid=59251	http://www.bindingdb.org/jsp/dbsearch/PrimarySearch_ki.jsp?energyterm=kJ/mole&tag=pol&polymerid=4753&target=3C-like+proteinase+%283CL-PRO%29&column=ki&startPg=0&Increment=50&submit=Search	http://www.bindingdb.org/jsp/dbsearch/PrimarySearch_ki.jsp?energyterm=kJ/mole&tag=r21&monomerid=59251&enzyme=3C-like+proteinase+%283CL-PRO%29&column=ki&startPg=0&Increment=50&submit=Search			15959248	125082217						ZINC34821676	1	MESLVLGVNEKTHVQLSLPVLQVRDVLVRGFGDSVEEALSEAREHLKNGTCGLVELEKGVLPQLEQPYVFIKRSDALSTNHGHKVVELVAEMDGIQYGRSGITLGVLVPHVGETPIAYRNVLLRKNGNKGAGGHSYGIDLKSYDLGDELGTDPIEDYEQNWNTKHGSGALRELTRELNGGAVTRYVDNNFCGPDGYPLDCIKDFLARAGKSMCTLSEQLDYIESKRGVYCCRDHEHEIAWFTERSDKSYEHQTPFEIKSAKKFDTFKGECPKFVFPLNSKVKVIQPRVEKKKTEGFMGRIRSVYPVASPQECNNMHLSTLMKCNHCDEVSWQTCDFLKATCEHCGTENLVIEGPTTCGYLPTNAVVKMPCPACQDPEIGPEHSVADYHNHSNIETRLRK…	1Q2W,1QZ8,1UJ1,1UK2,1UK3,1UK4,1UW7,1WOF,1Z1I,2A5A,2A5I,2A5K,2ACF,2AHM,2ALV,2AMD,2AMQ,2BX3,2BX4,2C3S,2D2D,2DUC,2FAV,2FE8,2FYG,2G9T,2GA6,2GDT,2GRI,2GT7,2GT8,2GTB,2GX4,2GZ7,2GZ8,2GZ9,2H2Z,2HOB,2HSX,2IDY,2JZF,2K7X,2K87,2KAF,2LIZ,2OP9,2OZK,2RNK,2V6N,2VJ1,2XYQ,2XYR,2XYV,2Z3C,2Z3D,2Z3E,2Z94,2Z9G,2Z9J,2Z9K,2Z9L,2ZU4,2ZU5,3D62,3E91,3E9S,3EA7,3EA8,3EBN,3IWM,3M3V,3MJ5,3R24,3SN8,3SNA,3SNB,3SNC,3SND,3SNE,3SZN…	Replicase polyprotein 1ab	R1AB_CVHSA	P0C6X7	P59641,Q6WGN0,Q7T697,Q808C0,Q80BV7,Q80BV8,Q80E51
111464	CN(C)c1ccc(cc1)C(O)Cn1nnc2ccccc12	InChI=1/C16H18N4O/c1-19(2)13-9-7-12(8-10-13)16(21)11-20-15-6-4-3-5-14(15)17-18-20/h3-10,16,21H,11H2,1-2H3	NUSWVZRFMFNTTJ-UHFFFAOYNA-N	59252	Benzotriazole ester, 20	3C-like proteinase (3CL-PRO)	Human SARS coronavirus	>5.0e+4						7.5		Curated from the literature by BindingDB	10.1016/j.chembiol.2005.12.008	16638531			Wu, CY; King, KY; Kuo, CJ; Fang, JM; Wu, YT; Ho, MY; Liao, CL; Shie, JJ; Liang, PH; Wong, CH	Academia Sinica	http://www.bindingdb.org/bind/chemsearch/marvin/MolStructure.jsp?monomerid=59252	http://www.bindingdb.org/jsp/dbsearch/PrimarySearch_ki.jsp?energyterm=kJ/mole&tag=pol&polymerid=4753&target=3C-like+proteinase+%283CL-PRO%29&column=ki&startPg=0&Increment=50&submit=Search	http://www.bindingdb.org/jsp/dbsearch/PrimarySearch_ki.jsp?energyterm=kJ/mole&tag=r21&monomerid=59252&enzyme=3C-like+proteinase+%283CL-PRO%29&column=ki&startPg=0&Increment=50&submit=Search			15959249	125082218						ZINC34821680	1	MESLVLGVNEKTHVQLSLPVLQVRDVLVRGFGDSVEEALSEAREHLKNGTCGLVELEKGVLPQLEQPYVFIKRSDALSTNHGHKVVELVAEMDGIQYGRSGITLGVLVPHVGETPIAYRNVLLRKNGNKGAGGHSYGIDLKSYDLGDELGTDPIEDYEQNWNTKHGSGALRELTRELNGGAVTRYVDNNFCGPDGYPLDCIKDFLARAGKSMCTLSEQLDYIESKRGVYCCRDHEHEIAWFTERSDKSYEHQTPFEIKSAKKFDTFKGECPKFVFPLNSKVKVIQPRVEKKKTEGFMGRIRSVYPVASPQECNNMHLSTLMKCNHCDEVSWQTCDFLKATCEHCGTENLVIEGPTTCGYLPTNAVVKMPCPACQDPEIGPEHSVADYHNHSNIETRLRK…	1Q2W,1QZ8,1UJ1,1UK2,1UK3,1UK4,1UW7,1WOF,1Z1I,2A5A,2A5I,2A5K,2ACF,2AHM,2ALV,2AMD,2AMQ,2BX3,2BX4,2C3S,2D2D,2DUC,2FAV,2FE8,2FYG,2G9T,2GA6,2GDT,2GRI,2GT7,2GT8,2GTB,2GX4,2GZ7,2GZ8,2GZ9,2H2Z,2HOB,2HSX,2IDY,2JZF,2K7X,2K87,2KAF,2LIZ,2OP9,2OZK,2RNK,2V6N,2VJ1,2XYQ,2XYR,2XYV,2Z3C,2Z3D,2Z3E,2Z94,2Z9G,2Z9J,2Z9K,2Z9L,2ZU4,2ZU5,3D62,3E91,3E9S,3EA7,3EA8,3EBN,3IWM,3M3V,3MJ5,3R24,3SN8,3SNA,3SNB,3SNC,3SND,3SNE,3SZN…	Replicase polyprotein 1ab	R1AB_CVHSA	P0C6X7	P59641,Q6WGN0,Q7T697,Q808C0,Q80BV7,Q80BV8,Q80E51
200721	CCOC(=O)\C=C\[C@H](C[C@@H]1CCNC1=O)NC(=O)[C@H](CC(C)C)NC(=O)[C@@H](NC(=O)OCc1ccccc1)C(C)OC(C)(C)C	InChI=1/C33H50N4O8/c1-8-43-27(38)15-14-25(19-24-16-17-34-29(24)39)35-30(40)26(18-21(2)3)36-31(41)28(22(4)45-33(5,6)7)37-32(42)44-20-23-12-10-9-11-13-23/h9-15,21-22,24-26,28H,8,16-20H2,1-7H3,(H,34,39)(H,35,40)(H,36,41)(H,37,42)/b15-14+/t22?,24-,25+,26-,28-/s2	PWBQMVUCCVWDEJ-YVGOWGDBNA-N	11232	N-[(benzyloxy)carbonyl]-O-(tert-butyl)-L-threonyl-N1-((1S,2E)-4-ethoxy-4-oxo-1-{[(3S)-2-oxopyrrolidin-3-yl]methyl}but-2-enyl)-L-leucinamide::TG-0203770::TG-0205221 Analogue 4::ethyl (2E,4S)-4-[(2S)-2-[(2S,3S)-2-{[(benzyloxy)carbonyl]amino}-3-(tert-butoxy)butanamido]-4-methylpentanamido]-5-[(3S)-2-oxopyrrolidin-3-yl]pent-2-enoate	3C-like proteinase (3CL-PRO)	Human SARS coronavirus	58						6.5	25.00 C	Curated from the literature by BindingDB	10.1074/jbc.M807947200	19144641			Lee, CC; Kuo, CJ; Ko, TP; Hsu, MF; Tsui, YC; Chang, SC; Yang, S; Chen, SJ; Chen, HC; Hsu, MC; Shih, SR; Liang, PH; Wang, AH	National Yang-Ming University	http://www.bindingdb.org/bind/chemsearch/marvin/MolStructure.jsp?monomerid=11232	http://www.bindingdb.org/jsp/dbsearch/PrimarySearch_ki.jsp?energyterm=kJ/mole&tag=pol&polymerid=4753&target=3C-like+proteinase+%283CL-PRO%29&column=ki&startPg=0&Increment=50&submit=Search	http://www.bindingdb.org/jsp/dbsearch/PrimarySearch_ki.jsp?energyterm=kJ/mole&tag=r21&monomerid=11232&enzyme=3C-like+proteinase+%283CL-PRO%29&column=ki&startPg=0&Increment=50&submit=Search			11786957	46509355						ZINC14947865	1	MESLVLGVNEKTHVQLSLPVLQVRDVLVRGFGDSVEEALSEAREHLKNGTCGLVELEKGVLPQLEQPYVFIKRSDALSTNHGHKVVELVAEMDGIQYGRSGITLGVLVPHVGETPIAYRNVLLRKNGNKGAGGHSYGIDLKSYDLGDELGTDPIEDYEQNWNTKHGSGALRELTRELNGGAVTRYVDNNFCGPDGYPLDCIKDFLARAGKSMCTLSEQLDYIESKRGVYCCRDHEHEIAWFTERSDKSYEHQTPFEIKSAKKFDTFKGECPKFVFPLNSKVKVIQPRVEKKKTEGFMGRIRSVYPVASPQECNNMHLSTLMKCNHCDEVSWQTCDFLKATCEHCGTENLVIEGPTTCGYLPTNAVVKMPCPACQDPEIGPEHSVADYHNHSNIETRLRK…	1Q2W,1QZ8,1UJ1,1UK2,1UK3,1UK4,1UW7,1WOF,1Z1I,2A5A,2A5I,2A5K,2ACF,2AHM,2ALV,2AMD,2AMQ,2BX3,2BX4,2C3S,2D2D,2DUC,2FAV,2FE8,2FYG,2G9T,2GA6,2GDT,2GRI,2GT7,2GT8,2GTB,2GX4,2GZ7,2GZ8,2GZ9,2H2Z,2HOB,2HSX,2IDY,2JZF,2K7X,2K87,2KAF,2LIZ,2OP9,2OZK,2RNK,2V6N,2VJ1,2XYQ,2XYR,2XYV,2Z3C,2Z3D,2Z3E,2Z94,2Z9G,2Z9J,2Z9K,2Z9L,2ZU4,2ZU5,3D62,3E91,3E9S,3EA7,3EA8,3EBN,3IWM,3M3V,3MJ5,3R24,3SN8,3SNA,3SNB,3SNC,3SND,3SNE,3SZN…	Replicase polyprotein 1ab	R1AB_CVHSA	P0C6X7	P59641,Q6WGN0,Q7T697,Q808C0,Q80BV7,Q80BV8,Q80E51
200722	CC(C)C[C@H](NC(=O)[C@H](CNC(=O)C(C)(C)C)NC(=O)OCc1ccccc1)C(=O)NC(C[C@@H]1CCNC1=O)=CCC(C)=O	InChI=1/C32H47N5O7/c1-20(2)16-25(28(40)35-24(13-12-21(3)38)17-23-14-15-33-27(23)39)36-29(41)26(18-34-30(42)32(4,5)6)37-31(43)44-19-22-10-8-7-9-11-22/h7-11,13,20,23,25-26H,12,14-19H2,1-6H3,(H,33,39)(H,34,42)(H,35,40)(H,36,41)(H,37,43)/b24-13+/t23-,25-,26-/s2	UMTSVVFRJWDHKP-YCQHOKKRNA-N	92520	TG-0204998	3C-like proteinase (3CL-PRO)	Human SARS coronavirus	38						6.5	25.00 C	Curated from the literature by BindingDB	10.1074/jbc.M807947200	19144641			Lee, CC; Kuo, CJ; Ko, TP; Hsu, MF; Tsui, YC; Chang, SC; Yang, S; Chen, SJ; Chen, HC; Hsu, MC; Shih, SR; Liang, PH; Wang, AH	National Yang-Ming University	http://www.bindingdb.org/bind/chemsearch/marvin/MolStructure.jsp?monomerid=92520	http://www.bindingdb.org/jsp/dbsearch/PrimarySearch_ki.jsp?energyterm=kJ/mole&tag=pol&polymerid=4753&target=3C-like+proteinase+%283CL-PRO%29&column=ki&startPg=0&Increment=50&submit=Search	http://www.bindingdb.org/jsp/dbsearch/PrimarySearch_ki.jsp?energyterm=kJ/mole&tag=r21&monomerid=92520&enzyme=3C-like+proteinase+%283CL-PRO%29&column=ki&startPg=0&Increment=50&submit=Search			91899429	160845017						ZINC89469628	1	MESLVLGVNEKTHVQLSLPVLQVRDVLVRGFGDSVEEALSEAREHLKNGTCGLVELEKGVLPQLEQPYVFIKRSDALSTNHGHKVVELVAEMDGIQYGRSGITLGVLVPHVGETPIAYRNVLLRKNGNKGAGGHSYGIDLKSYDLGDELGTDPIEDYEQNWNTKHGSGALRELTRELNGGAVTRYVDNNFCGPDGYPLDCIKDFLARAGKSMCTLSEQLDYIESKRGVYCCRDHEHEIAWFTERSDKSYEHQTPFEIKSAKKFDTFKGECPKFVFPLNSKVKVIQPRVEKKKTEGFMGRIRSVYPVASPQECNNMHLSTLMKCNHCDEVSWQTCDFLKATCEHCGTENLVIEGPTTCGYLPTNAVVKMPCPACQDPEIGPEHSVADYHNHSNIETRLRK…	1Q2W,1QZ8,1UJ1,1UK2,1UK3,1UK4,1UW7,1WOF,1Z1I,2A5A,2A5I,2A5K,2ACF,2AHM,2ALV,2AMD,2AMQ,2BX3,2BX4,2C3S,2D2D,2DUC,2FAV,2FE8,2FYG,2G9T,2GA6,2GDT,2GRI,2GT7,2GT8,2GTB,2GX4,2GZ7,2GZ8,2GZ9,2H2Z,2HOB,2HSX,2IDY,2JZF,2K7X,2K87,2KAF,2LIZ,2OP9,2OZK,2RNK,2V6N,2VJ1,2XYQ,2XYR,2XYV,2Z3C,2Z3D,2Z3E,2Z94,2Z9G,2Z9J,2Z9K,2Z9L,2ZU4,2ZU5,3D62,3E91,3E9S,3EA7,3EA8,3EBN,3IWM,3M3V,3MJ5,3R24,3SN8,3SNA,3SNB,3SNC,3SND,3SNE,3SZN…	Replicase polyprotein 1ab	R1AB_CVHSA	P0C6X7	P59641,Q6WGN0,Q7T697,Q808C0,Q80BV7,Q80BV8,Q80E51
200723	C[C@H](OC(C)(C)C)[C@H](NC(=O)OCc1ccccc1)C(=O)N[C@@H](CC1CCCCC1)C(=O)N[C@@H](C[C@@H]1CCNC1=O)C=O	InChI=1/C32H48N4O7/c1-21(43-32(2,3)4)27(36-31(41)42-20-23-13-9-6-10-14-23)30(40)35-26(17-22-11-7-5-8-12-22)29(39)34-25(19-37)18-24-15-16-33-28(24)38/h6,9-10,13-14,19,21-22,24-27H,5,7-8,11-12,15-18,20H2,1-4H3,(H,33,38)(H,34,39)(H,35,40)(H,36,41)/t21-,24-,25-,26-,27-/s2	YFUZVOLEKQFVCQ-IQHMNMHVNA-N	11233	N-[(benzyloxy)carbonyl]-O-(tert-butyl)-L-threonyl-3-cyclohexyl-N1-{(1S)-1-formyl-2-[(3S)-2-oxopyrrolidin-3-yl]ethyl}-L-alaninamide::TG-0205221::benzyl N-[(1S,2S)-2-(tert-butoxy)-1-{[(1S)-2-cyclohexyl-1-{[(2S)-1-oxo-3-[(3S)-2-oxopyrrolidin-3-yl]propan-2-yl]carbamoyl}ethyl]carbamoyl}propyl]carbamate	3C-like proteinase (3CL-PRO)	Human SARS coronavirus	54						6.5	25.00 C	Curated from the literature by BindingDB	10.1074/jbc.M807947200	19144641			Lee, CC; Kuo, CJ; Ko, TP; Hsu, MF; Tsui, YC; Chang, SC; Yang, S; Chen, SJ; Chen, HC; Hsu, MC; Shih, SR; Liang, PH; Wang, AH	National Yang-Ming University	http://www.bindingdb.org/bind/chemsearch/marvin/MolStructure.jsp?monomerid=11233	http://www.bindingdb.org/jsp/dbsearch/PrimarySearch_ki.jsp?energyterm=kJ/mole&tag=pol&polymerid=4753&target=3C-like+proteinase+%283CL-PRO%29&column=ki&startPg=0&Increment=50&submit=Search	http://www.bindingdb.org/jsp/dbsearch/PrimarySearch_ki.jsp?energyterm=kJ/mole&tag=r21&monomerid=11233&enzyme=3C-like+proteinase+%283CL-PRO%29&column=ki&startPg=0&Increment=50&submit=Search			91895789	46509356						ZINC14947873	1	MESLVLGVNEKTHVQLSLPVLQVRDVLVRGFGDSVEEALSEAREHLKNGTCGLVELEKGVLPQLEQPYVFIKRSDALSTNHGHKVVELVAEMDGIQYGRSGITLGVLVPHVGETPIAYRNVLLRKNGNKGAGGHSYGIDLKSYDLGDELGTDPIEDYEQNWNTKHGSGALRELTRELNGGAVTRYVDNNFCGPDGYPLDCIKDFLARAGKSMCTLSEQLDYIESKRGVYCCRDHEHEIAWFTERSDKSYEHQTPFEIKSAKKFDTFKGECPKFVFPLNSKVKVIQPRVEKKKTEGFMGRIRSVYPVASPQECNNMHLSTLMKCNHCDEVSWQTCDFLKATCEHCGTENLVIEGPTTCGYLPTNAVVKMPCPACQDPEIGPEHSVADYHNHSNIETRLRK…	1Q2W,1QZ8,1UJ1,1UK2,1UK3,1UK4,1UW7,1WOF,1Z1I,2A5A,2A5I,2A5K,2ACF,2AHM,2ALV,2AMD,2AMQ,2BX3,2BX4,2C3S,2D2D,2DUC,2FAV,2FE8,2FYG,2G9T,2GA6,2GDT,2GRI,2GT7,2GT8,2GTB,2GX4,2GZ7,2GZ8,2GZ9,2H2Z,2HOB,2HSX,2IDY,2JZF,2K7X,2K87,2KAF,2LIZ,2OP9,2OZK,2RNK,2V6N,2VJ1,2XYQ,2XYR,2XYV,2Z3C,2Z3D,2Z3E,2Z94,2Z9G,2Z9J,2Z9K,2Z9L,2ZU4,2ZU5,3D62,3E91,3E9S,3EA7,3EA8,3EBN,3IWM,3M3V,3MJ5,3R24,3SN8,3SNA,3SNB,3SNC,3SND,3SNE,3SZN…	Replicase polyprotein 1ab	R1AB_CVHSA	P0C6X7	P59641,Q6WGN0,Q7T697,Q808C0,Q80BV7,Q80BV8,Q80E51
200724	CC(C)C[C@H](NC(=O)[C@@H](NC(=O)OCc1ccccc1)C(C)OC(C)(C)C)C(=O)NC(C[C@@H]1CCNC1=O)=CCC(=O)C1CC1	InChI=1/C34H50N4O7/c1-21(2)18-27(31(41)36-26(14-15-28(39)24-12-13-24)19-25-16-17-35-30(25)40)37-32(42)29(22(3)45-34(4,5)6)38-33(43)44-20-23-10-8-7-9-11-23/h7-11,14,21-22,24-25,27,29H,12-13,15-20H2,1-6H3,(H,35,40)(H,36,41)(H,37,42)(H,38,43)/b26-14+/t22?,25-,27-,29-/s2	DYJPFWSTGIYMHT-WOVYESRHNA-N	92521	TG-0205486	3C-like proteinase (3CL-PRO)	Human SARS coronavirus	99						6.5	25.00 C	Curated from the literature by BindingDB	10.1074/jbc.M807947200	19144641			Lee, CC; Kuo, CJ; Ko, TP; Hsu, MF; Tsui, YC; Chang, SC; Yang, S; Chen, SJ; Chen, HC; Hsu, MC; Shih, SR; Liang, PH; Wang, AH	National Yang-Ming University	http://www.bindingdb.org/bind/chemsearch/marvin/MolStructure.jsp?monomerid=92521	http://www.bindingdb.org/jsp/dbsearch/PrimarySearch_ki.jsp?energyterm=kJ/mole&tag=pol&polymerid=4753&target=3C-like+proteinase+%283CL-PRO%29&column=ki&startPg=0&Increment=50&submit=Search	http://www.bindingdb.org/jsp/dbsearch/PrimarySearch_ki.jsp?energyterm=kJ/mole&tag=r21&monomerid=92521&enzyme=3C-like+proteinase+%283CL-PRO%29&column=ki&startPg=0&Increment=50&submit=Search			91899430	160845018						ZINC89469632	1	MESLVLGVNEKTHVQLSLPVLQVRDVLVRGFGDSVEEALSEAREHLKNGTCGLVELEKGVLPQLEQPYVFIKRSDALSTNHGHKVVELVAEMDGIQYGRSGITLGVLVPHVGETPIAYRNVLLRKNGNKGAGGHSYGIDLKSYDLGDELGTDPIEDYEQNWNTKHGSGALRELTRELNGGAVTRYVDNNFCGPDGYPLDCIKDFLARAGKSMCTLSEQLDYIESKRGVYCCRDHEHEIAWFTERSDKSYEHQTPFEIKSAKKFDTFKGECPKFVFPLNSKVKVIQPRVEKKKTEGFMGRIRSVYPVASPQECNNMHLSTLMKCNHCDEVSWQTCDFLKATCEHCGTENLVIEGPTTCGYLPTNAVVKMPCPACQDPEIGPEHSVADYHNHSNIETRLRK…	1Q2W,1QZ8,1UJ1,1UK2,1UK3,1UK4,1UW7,1WOF,1Z1I,2A5A,2A5I,2A5K,2ACF,2AHM,2ALV,2AMD,2AMQ,2BX3,2BX4,2C3S,2D2D,2DUC,2FAV,2FE8,2FYG,2G9T,2GA6,2GDT,2GRI,2GT7,2GT8,2GTB,2GX4,2GZ7,2GZ8,2GZ9,2H2Z,2HOB,2HSX,2IDY,2JZF,2K7X,2K87,2KAF,2LIZ,2OP9,2OZK,2RNK,2V6N,2VJ1,2XYQ,2XYR,2XYV,2Z3C,2Z3D,2Z3E,2Z94,2Z9G,2Z9J,2Z9K,2Z9L,2ZU4,2ZU5,3D62,3E91,3E9S,3EA7,3EA8,3EBN,3IWM,3M3V,3MJ5,3R24,3SN8,3SNA,3SNB,3SNC,3SND,3SNE,3SZN…	Replicase polyprotein 1ab	R1AB_CVHSA	P0C6X7	P59641,Q6WGN0,Q7T697,Q808C0,Q80BV7,Q80BV8,Q80E51
50151719	OC(=O)C(=O)CC(=O)c1ccc(OCc2ccccc2)cc1	InChI=1S/C17H14O5/c18-15(10-16(19)17(20)21)13-6-8-14(9-7-13)22-11-12-4-2-1-3-5-12/h1-9H,10-11H2,(H,20,21)	KMRYXNIEUDTYAJ-UHFFFAOYSA-N	50258085	4-(4-(benzyloxy)phenyl)-2-hydroxy-4-oxobut-2-enoic acid::CHEMBL492768	3C-like proteinase (3CL-PRO)	Human SARS coronavirus		39900							ChEMBL	10.1016/j.bmcl.2009.02.010	19233643			Lee, C; Lee, JM; Lee, NR; Jin, BS; Jang, KJ; Kim, DE; Jeong, YJ; Chong, Y	Konkuk University	http://www.bindingdb.org/bind/chemsearch/marvin/MolStructure.jsp?monomerid=50258085	http://www.bindingdb.org/jsp/dbsearch/PrimarySearch_ki.jsp?energyterm=kJ/mole&tag=pol&polymerid=4753&target=3C-like+proteinase+%283CL-PRO%29&column=ki&startPg=0&Increment=50&submit=Search	http://www.bindingdb.org/jsp/dbsearch/PrimarySearch_ki.jsp?energyterm=kJ/mole&tag=r21&monomerid=50258085&enzyme=3C-like+proteinase+%283CL-PRO%29&column=ki&startPg=0&Increment=50&submit=Search			23090268	104108909		CHEMBL492768			C00972	ZINC40949462	1	MESLVLGVNEKTHVQLSLPVLQVRDVLVRGFGDSVEEALSEAREHLKNGTCGLVELEKGVLPQLEQPYVFIKRSDALSTNHGHKVVELVAEMDGIQYGRSGITLGVLVPHVGETPIAYRNVLLRKNGNKGAGGHSYGIDLKSYDLGDELGTDPIEDYEQNWNTKHGSGALRELTRELNGGAVTRYVDNNFCGPDGYPLDCIKDFLARAGKSMCTLSEQLDYIESKRGVYCCRDHEHEIAWFTERSDKSYEHQTPFEIKSAKKFDTFKGECPKFVFPLNSKVKVIQPRVEKKKTEGFMGRIRSVYPVASPQECNNMHLSTLMKCNHCDEVSWQTCDFLKATCEHCGTENLVIEGPTTCGYLPTNAVVKMPCPACQDPEIGPEHSVADYHNHSNIETRLRK…	1Q2W,1QZ8,1UJ1,1UK2,1UK3,1UK4,1UW7,1WOF,1Z1I,2A5A,2A5I,2A5K,2ACF,2AHM,2ALV,2AMD,2AMQ,2BX3,2BX4,2C3S,2D2D,2DUC,2FAV,2FE8,2FYG,2G9T,2GA6,2GDT,2GRI,2GT7,2GT8,2GTB,2GX4,2GZ7,2GZ8,2GZ9,2H2Z,2HOB,2HSX,2IDY,2JZF,2K7X,2K87,2KAF,2LIZ,2OP9,2OZK,2RNK,2V6N,2VJ1,2XYQ,2XYR,2XYV,2Z3C,2Z3D,2Z3E,2Z94,2Z9G,2Z9J,2Z9K,2Z9L,2ZU4,2ZU5,3D62,3E91,3E9S,3EA7,3EA8,3EBN,3IWM,3M3V,3MJ5,3R24,3SN8,3SNA,3SNB,3SNC,3SND,3SNE,3SZN…	Replicase polyprotein 1ab	R1AB_CVHSA	P0C6X7	P59641,Q6WGN0,Q7T697,Q808C0,Q80BV7,Q80BV8,Q80E51
50151720	OC(=O)C(=O)CC(=O)c1cccc(NCc2ccc(Cl)cc2)c1	InChI=1S/C17H14ClNO4/c18-13-6-4-11(5-7-13)10-19-14-3-1-2-12(8-14)15(20)9-16(21)17(22)23/h1-8,19H,9-10H2,(H,22,23)	LXCYOKXQXCRNRS-UHFFFAOYSA-N	50258183	4-(3-(4-chlorobenzylamino)phenyl)-2-hydroxy-4-oxobut-2-enoic acid::CHEMBL522710	3C-like proteinase (3CL-PRO)	Human SARS coronavirus		>50000							ChEMBL	10.1016/j.bmcl.2009.02.010	19233643			Lee, C; Lee, JM; Lee, NR; Jin, BS; Jang, KJ; Kim, DE; Jeong, YJ; Chong, Y	Konkuk University	http://www.bindingdb.org/bind/chemsearch/marvin/MolStructure.jsp?monomerid=50258183	http://www.bindingdb.org/jsp/dbsearch/PrimarySearch_ki.jsp?energyterm=kJ/mole&tag=pol&polymerid=4753&target=3C-like+proteinase+%283CL-PRO%29&column=ki&startPg=0&Increment=50&submit=Search	http://www.bindingdb.org/jsp/dbsearch/PrimarySearch_ki.jsp?energyterm=kJ/mole&tag=r21&monomerid=50258183&enzyme=3C-like+proteinase+%283CL-PRO%29&column=ki&startPg=0&Increment=50&submit=Search			91935363	104108967		CHEMBL522710			C00972	ZINC40955733	1	MESLVLGVNEKTHVQLSLPVLQVRDVLVRGFGDSVEEALSEAREHLKNGTCGLVELEKGVLPQLEQPYVFIKRSDALSTNHGHKVVELVAEMDGIQYGRSGITLGVLVPHVGETPIAYRNVLLRKNGNKGAGGHSYGIDLKSYDLGDELGTDPIEDYEQNWNTKHGSGALRELTRELNGGAVTRYVDNNFCGPDGYPLDCIKDFLARAGKSMCTLSEQLDYIESKRGVYCCRDHEHEIAWFTERSDKSYEHQTPFEIKSAKKFDTFKGECPKFVFPLNSKVKVIQPRVEKKKTEGFMGRIRSVYPVASPQECNNMHLSTLMKCNHCDEVSWQTCDFLKATCEHCGTENLVIEGPTTCGYLPTNAVVKMPCPACQDPEIGPEHSVADYHNHSNIETRLRK…	1Q2W,1QZ8,1UJ1,1UK2,1UK3,1UK4,1UW7,1WOF,1Z1I,2A5A,2A5I,2A5K,2ACF,2AHM,2ALV,2AMD,2AMQ,2BX3,2BX4,2C3S,2D2D,2DUC,2FAV,2FE8,2FYG,2G9T,2GA6,2GDT,2GRI,2GT7,2GT8,2GTB,2GX4,2GZ7,2GZ8,2GZ9,2H2Z,2HOB,2HSX,2IDY,2JZF,2K7X,2K87,2KAF,2LIZ,2OP9,2OZK,2RNK,2V6N,2VJ1,2XYQ,2XYR,2XYV,2Z3C,2Z3D,2Z3E,2Z94,2Z9G,2Z9J,2Z9K,2Z9L,2ZU4,2ZU5,3D62,3E91,3E9S,3EA7,3EA8,3EBN,3IWM,3M3V,3MJ5,3R24,3SN8,3SNA,3SNB,3SNC,3SND,3SNE,3SZN…	Replicase polyprotein 1ab	R1AB_CVHSA	P0C6X7	P59641,Q6WGN0,Q7T697,Q808C0,Q80BV7,Q80BV8,Q80E51
50151721	OC(=O)C(=O)CC(=O)c1cccc(NCc2ccccc2)c1	InChI=1S/C17H15NO4/c19-15(10-16(20)17(21)22)13-7-4-8-14(9-13)18-11-12-5-2-1-3-6-12/h1-9,18H,10-11H2,(H,21,22)	SPMMLCCLNJGITG-UHFFFAOYSA-N	50137863	4-(3-Benzylamino-phenyl)-2,4-dioxo-butyric acid::CHEMBL367740::CHEMBL371719::CHEMBL492571	3C-like proteinase (3CL-PRO)	Human SARS coronavirus		>50000							ChEMBL	10.1016/j.bmcl.2009.02.010	19233643			Lee, C; Lee, JM; Lee, NR; Jin, BS; Jang, KJ; Kim, DE; Jeong, YJ; Chong, Y	Konkuk University	http://www.bindingdb.org/bind/chemsearch/marvin/MolStructure.jsp?monomerid=50137863	http://www.bindingdb.org/jsp/dbsearch/PrimarySearch_ki.jsp?energyterm=kJ/mole&tag=pol&polymerid=4753&target=3C-like+proteinase+%283CL-PRO%29&column=ki&startPg=0&Increment=50&submit=Search	http://www.bindingdb.org/jsp/dbsearch/PrimarySearch_ki.jsp?energyterm=kJ/mole&tag=r21&monomerid=50137863&enzyme=3C-like+proteinase+%283CL-PRO%29&column=ki&startPg=0&Increment=50&submit=Search			510665	104028006		CHEMBL492571CHEMBL371719CHEMBL367740			C00972	ZINC13531973	1	MESLVLGVNEKTHVQLSLPVLQVRDVLVRGFGDSVEEALSEAREHLKNGTCGLVELEKGVLPQLEQPYVFIKRSDALSTNHGHKVVELVAEMDGIQYGRSGITLGVLVPHVGETPIAYRNVLLRKNGNKGAGGHSYGIDLKSYDLGDELGTDPIEDYEQNWNTKHGSGALRELTRELNGGAVTRYVDNNFCGPDGYPLDCIKDFLARAGKSMCTLSEQLDYIESKRGVYCCRDHEHEIAWFTERSDKSYEHQTPFEIKSAKKFDTFKGECPKFVFPLNSKVKVIQPRVEKKKTEGFMGRIRSVYPVASPQECNNMHLSTLMKCNHCDEVSWQTCDFLKATCEHCGTENLVIEGPTTCGYLPTNAVVKMPCPACQDPEIGPEHSVADYHNHSNIETRLRK…	1Q2W,1QZ8,1UJ1,1UK2,1UK3,1UK4,1UW7,1WOF,1Z1I,2A5A,2A5I,2A5K,2ACF,2AHM,2ALV,2AMD,2AMQ,2BX3,2BX4,2C3S,2D2D,2DUC,2FAV,2FE8,2FYG,2G9T,2GA6,2GDT,2GRI,2GT7,2GT8,2GTB,2GX4,2GZ7,2GZ8,2GZ9,2H2Z,2HOB,2HSX,2IDY,2JZF,2K7X,2K87,2KAF,2LIZ,2OP9,2OZK,2RNK,2V6N,2VJ1,2XYQ,2XYR,2XYV,2Z3C,2Z3D,2Z3E,2Z94,2Z9G,2Z9J,2Z9K,2Z9L,2ZU4,2ZU5,3D62,3E91,3E9S,3EA7,3EA8,3EBN,3IWM,3M3V,3MJ5,3R24,3SN8,3SNA,3SNB,3SNC,3SND,3SNE,3SZN…	Replicase polyprotein 1ab	R1AB_CVHSA	P0C6X7	P59641,Q6WGN0,Q7T697,Q808C0,Q80BV7,Q80BV8,Q80E51
50151722	OC(=O)C(=O)CC(=O)c1ccc(OCc2ccc(Cl)cc2)cc1	InChI=1S/C17H13ClO5/c18-13-5-1-11(2-6-13)10-23-14-7-3-12(4-8-14)15(19)9-16(20)17(21)22/h1-8H,9-10H2,(H,21,22)	VNFJWPKQPJOPAE-UHFFFAOYSA-N	50258132	4-(4-(4-chlorobenzyloxy)phenyl)-2-hydroxy-4-oxobut-2-enoic acid::CHEMBL492769	3C-like proteinase (3CL-PRO)	Human SARS coronavirus		>50000							ChEMBL	10.1016/j.bmcl.2009.02.010	19233643			Lee, C; Lee, JM; Lee, NR; Jin, BS; Jang, KJ; Kim, DE; Jeong, YJ; Chong, Y	Konkuk University	http://www.bindingdb.org/bind/chemsearch/marvin/MolStructure.jsp?monomerid=50258132	http://www.bindingdb.org/jsp/dbsearch/PrimarySearch_ki.jsp?energyterm=kJ/mole&tag=pol&polymerid=4753&target=3C-like+proteinase+%283CL-PRO%29&column=ki&startPg=0&Increment=50&submit=Search	http://www.bindingdb.org/jsp/dbsearch/PrimarySearch_ki.jsp?energyterm=kJ/mole&tag=r21&monomerid=50258132&enzyme=3C-like+proteinase+%283CL-PRO%29&column=ki&startPg=0&Increment=50&submit=Search			91935360	104108935		CHEMBL492769			C00972	ZINC40949754	1	MESLVLGVNEKTHVQLSLPVLQVRDVLVRGFGDSVEEALSEAREHLKNGTCGLVELEKGVLPQLEQPYVFIKRSDALSTNHGHKVVELVAEMDGIQYGRSGITLGVLVPHVGETPIAYRNVLLRKNGNKGAGGHSYGIDLKSYDLGDELGTDPIEDYEQNWNTKHGSGALRELTRELNGGAVTRYVDNNFCGPDGYPLDCIKDFLARAGKSMCTLSEQLDYIESKRGVYCCRDHEHEIAWFTERSDKSYEHQTPFEIKSAKKFDTFKGECPKFVFPLNSKVKVIQPRVEKKKTEGFMGRIRSVYPVASPQECNNMHLSTLMKCNHCDEVSWQTCDFLKATCEHCGTENLVIEGPTTCGYLPTNAVVKMPCPACQDPEIGPEHSVADYHNHSNIETRLRK…	1Q2W,1QZ8,1UJ1,1UK2,1UK3,1UK4,1UW7,1WOF,1Z1I,2A5A,2A5I,2A5K,2ACF,2AHM,2ALV,2AMD,2AMQ,2BX3,2BX4,2C3S,2D2D,2DUC,2FAV,2FE8,2FYG,2G9T,2GA6,2GDT,2GRI,2GT7,2GT8,2GTB,2GX4,2GZ7,2GZ8,2GZ9,2H2Z,2HOB,2HSX,2IDY,2JZF,2K7X,2K87,2KAF,2LIZ,2OP9,2OZK,2RNK,2V6N,2VJ1,2XYQ,2XYR,2XYV,2Z3C,2Z3D,2Z3E,2Z94,2Z9G,2Z9J,2Z9K,2Z9L,2ZU4,2ZU5,3D62,3E91,3E9S,3EA7,3EA8,3EBN,3IWM,3M3V,3MJ5,3R24,3SN8,3SNA,3SNB,3SNC,3SND,3SNE,3SZN…	Replicase polyprotein 1ab	R1AB_CVHSA	P0C6X7	P59641,Q6WGN0,Q7T697,Q808C0,Q80BV7,Q80BV8,Q80E51
50151723	OC(=O)C(=O)CC(=O)c1ccccc1OCc1ccc(Cl)cc1	InChI=1S/C17H13ClO5/c18-12-7-5-11(6-8-12)10-23-16-4-2-1-3-13(16)14(19)9-15(20)17(21)22/h1-8H,9-10H2,(H,21,22)	FPKWTTGUQSRLMF-UHFFFAOYSA-N	50258136	4-(2-(4-chlorobenzyloxy)phenyl)-2-hydroxy-4-oxobut-2-enoic acid::CHEMBL492772	3C-like proteinase (3CL-PRO)	Human SARS coronavirus		>50000							ChEMBL	10.1016/j.bmcl.2009.02.010	19233643			Lee, C; Lee, JM; Lee, NR; Jin, BS; Jang, KJ; Kim, DE; Jeong, YJ; Chong, Y	Konkuk University	http://www.bindingdb.org/bind/chemsearch/marvin/MolStructure.jsp?monomerid=50258136	http://www.bindingdb.org/jsp/dbsearch/PrimarySearch_ki.jsp?energyterm=kJ/mole&tag=pol&polymerid=4753&target=3C-like+proteinase+%283CL-PRO%29&column=ki&startPg=0&Increment=50&submit=Search	http://www.bindingdb.org/jsp/dbsearch/PrimarySearch_ki.jsp?energyterm=kJ/mole&tag=r21&monomerid=50258136&enzyme=3C-like+proteinase+%283CL-PRO%29&column=ki&startPg=0&Increment=50&submit=Search			91935362	104108939		CHEMBL492772			C00972	ZINC40949758	1	MESLVLGVNEKTHVQLSLPVLQVRDVLVRGFGDSVEEALSEAREHLKNGTCGLVELEKGVLPQLEQPYVFIKRSDALSTNHGHKVVELVAEMDGIQYGRSGITLGVLVPHVGETPIAYRNVLLRKNGNKGAGGHSYGIDLKSYDLGDELGTDPIEDYEQNWNTKHGSGALRELTRELNGGAVTRYVDNNFCGPDGYPLDCIKDFLARAGKSMCTLSEQLDYIESKRGVYCCRDHEHEIAWFTERSDKSYEHQTPFEIKSAKKFDTFKGECPKFVFPLNSKVKVIQPRVEKKKTEGFMGRIRSVYPVASPQECNNMHLSTLMKCNHCDEVSWQTCDFLKATCEHCGTENLVIEGPTTCGYLPTNAVVKMPCPACQDPEIGPEHSVADYHNHSNIETRLRK…	1Q2W,1QZ8,1UJ1,1UK2,1UK3,1UK4,1UW7,1WOF,1Z1I,2A5A,2A5I,2A5K,2ACF,2AHM,2ALV,2AMD,2AMQ,2BX3,2BX4,2C3S,2D2D,2DUC,2FAV,2FE8,2FYG,2G9T,2GA6,2GDT,2GRI,2GT7,2GT8,2GTB,2GX4,2GZ7,2GZ8,2GZ9,2H2Z,2HOB,2HSX,2IDY,2JZF,2K7X,2K87,2KAF,2LIZ,2OP9,2OZK,2RNK,2V6N,2VJ1,2XYQ,2XYR,2XYV,2Z3C,2Z3D,2Z3E,2Z94,2Z9G,2Z9J,2Z9K,2Z9L,2ZU4,2ZU5,3D62,3E91,3E9S,3EA7,3EA8,3EBN,3IWM,3M3V,3MJ5,3R24,3SN8,3SNA,3SNB,3SNC,3SND,3SNE,3SZN…	Replicase polyprotein 1ab	R1AB_CVHSA	P0C6X7	P59641,Q6WGN0,Q7T697,Q808C0,Q80BV7,Q80BV8,Q80E51
50151724	OC(=O)C(=O)CC(=O)c1cccc(OCc2ccccc2)c1	InChI=1S/C17H14O5/c18-15(10-16(19)17(20)21)13-7-4-8-14(9-13)22-11-12-5-2-1-3-6-12/h1-9H,10-11H2,(H,20,21)	FCBLTJFBERTVBY-UHFFFAOYSA-N	50115572	(Z)-4-(3-Benzyloxy-phenyl)-2-hydroxy-4-oxo-but-2-enoic acid::4-(3-Benzyloxy-phenyl)-2-hydroxy-4-oxo-but-2-enoic acid::CHEMBL108253::CHEMBL18927::CHEMBL492770	3C-like proteinase (3CL-PRO)	Human SARS coronavirus		>50000							ChEMBL	10.1016/j.bmcl.2009.02.010	19233643			Lee, C; Lee, JM; Lee, NR; Jin, BS; Jang, KJ; Kim, DE; Jeong, YJ; Chong, Y	Konkuk University	http://www.bindingdb.org/bind/chemsearch/marvin/MolStructure.jsp?monomerid=50115572	http://www.bindingdb.org/jsp/dbsearch/PrimarySearch_ki.jsp?energyterm=kJ/mole&tag=pol&polymerid=4753&target=3C-like+proteinase+%283CL-PRO%29&column=ki&startPg=0&Increment=50&submit=Search	http://www.bindingdb.org/jsp/dbsearch/PrimarySearch_ki.jsp?energyterm=kJ/mole&tag=r21&monomerid=50115572&enzyme=3C-like+proteinase+%283CL-PRO%29&column=ki&startPg=0&Increment=50&submit=Search			493415	104009487		CHEMBL108253CHEMBL492770CHEMBL18927			C00972	ZINC13488694	1	MESLVLGVNEKTHVQLSLPVLQVRDVLVRGFGDSVEEALSEAREHLKNGTCGLVELEKGVLPQLEQPYVFIKRSDALSTNHGHKVVELVAEMDGIQYGRSGITLGVLVPHVGETPIAYRNVLLRKNGNKGAGGHSYGIDLKSYDLGDELGTDPIEDYEQNWNTKHGSGALRELTRELNGGAVTRYVDNNFCGPDGYPLDCIKDFLARAGKSMCTLSEQLDYIESKRGVYCCRDHEHEIAWFTERSDKSYEHQTPFEIKSAKKFDTFKGECPKFVFPLNSKVKVIQPRVEKKKTEGFMGRIRSVYPVASPQECNNMHLSTLMKCNHCDEVSWQTCDFLKATCEHCGTENLVIEGPTTCGYLPTNAVVKMPCPACQDPEIGPEHSVADYHNHSNIETRLRK…	1Q2W,1QZ8,1UJ1,1UK2,1UK3,1UK4,1UW7,1WOF,1Z1I,2A5A,2A5I,2A5K,2ACF,2AHM,2ALV,2AMD,2AMQ,2BX3,2BX4,2C3S,2D2D,2DUC,2FAV,2FE8,2FYG,2G9T,2GA6,2GDT,2GRI,2GT7,2GT8,2GTB,2GX4,2GZ7,2GZ8,2GZ9,2H2Z,2HOB,2HSX,2IDY,2JZF,2K7X,2K87,2KAF,2LIZ,2OP9,2OZK,2RNK,2V6N,2VJ1,2XYQ,2XYR,2XYV,2Z3C,2Z3D,2Z3E,2Z94,2Z9G,2Z9J,2Z9K,2Z9L,2ZU4,2ZU5,3D62,3E91,3E9S,3EA7,3EA8,3EBN,3IWM,3M3V,3MJ5,3R24,3SN8,3SNA,3SNB,3SNC,3SND,3SNE,3SZN…	Replicase polyprotein 1ab	R1AB_CVHSA	P0C6X7	P59641,Q6WGN0,Q7T697,Q808C0,Q80BV7,Q80BV8,Q80E51
50151725	OC(=O)C(=O)CC(=O)c1ccccc1OCc1ccccc1	InChI=1S/C17H14O5/c18-14(10-15(19)17(20)21)13-8-4-5-9-16(13)22-11-12-6-2-1-3-7-12/h1-9H,10-11H2,(H,20,21)	STKCEKDDIVPHDO-UHFFFAOYSA-N	50137878	4-(2-Benzyloxy-phenyl)-2,4-dioxo-butyric acid::4-[2-(benzyloxy)phenyl]-2,4-dioxobutanoic acid::CHEMBL199199::CHEMBL368481::CHEMBL499444	3C-like proteinase (3CL-PRO)	Human SARS coronavirus		>50000							ChEMBL	10.1016/j.bmcl.2009.02.010	19233643			Lee, C; Lee, JM; Lee, NR; Jin, BS; Jang, KJ; Kim, DE; Jeong, YJ; Chong, Y	Konkuk University	http://www.bindingdb.org/bind/chemsearch/marvin/MolStructure.jsp?monomerid=50137878	http://www.bindingdb.org/jsp/dbsearch/PrimarySearch_ki.jsp?energyterm=kJ/mole&tag=pol&polymerid=4753&target=3C-like+proteinase+%283CL-PRO%29&column=ki&startPg=0&Increment=50&submit=Search	http://www.bindingdb.org/jsp/dbsearch/PrimarySearch_ki.jsp?energyterm=kJ/mole&tag=r21&monomerid=50137878&enzyme=3C-like+proteinase+%283CL-PRO%29&column=ki&startPg=0&Increment=50&submit=Search			510646	104028021		CHEMBL199199CHEMBL499444CHEMBL368481			C00972	ZINC13674051	1	MESLVLGVNEKTHVQLSLPVLQVRDVLVRGFGDSVEEALSEAREHLKNGTCGLVELEKGVLPQLEQPYVFIKRSDALSTNHGHKVVELVAEMDGIQYGRSGITLGVLVPHVGETPIAYRNVLLRKNGNKGAGGHSYGIDLKSYDLGDELGTDPIEDYEQNWNTKHGSGALRELTRELNGGAVTRYVDNNFCGPDGYPLDCIKDFLARAGKSMCTLSEQLDYIESKRGVYCCRDHEHEIAWFTERSDKSYEHQTPFEIKSAKKFDTFKGECPKFVFPLNSKVKVIQPRVEKKKTEGFMGRIRSVYPVASPQECNNMHLSTLMKCNHCDEVSWQTCDFLKATCEHCGTENLVIEGPTTCGYLPTNAVVKMPCPACQDPEIGPEHSVADYHNHSNIETRLRK…	1Q2W,1QZ8,1UJ1,1UK2,1UK3,1UK4,1UW7,1WOF,1Z1I,2A5A,2A5I,2A5K,2ACF,2AHM,2ALV,2AMD,2AMQ,2BX3,2BX4,2C3S,2D2D,2DUC,2FAV,2FE8,2FYG,2G9T,2GA6,2GDT,2GRI,2GT7,2GT8,2GTB,2GX4,2GZ7,2GZ8,2GZ9,2H2Z,2HOB,2HSX,2IDY,2JZF,2K7X,2K87,2KAF,2LIZ,2OP9,2OZK,2RNK,2V6N,2VJ1,2XYQ,2XYR,2XYV,2Z3C,2Z3D,2Z3E,2Z94,2Z9G,2Z9J,2Z9K,2Z9L,2ZU4,2ZU5,3D62,3E91,3E9S,3EA7,3EA8,3EBN,3IWM,3M3V,3MJ5,3R24,3SN8,3SNA,3SNB,3SNC,3SND,3SNE,3SZN…	Replicase polyprotein 1ab	R1AB_CVHSA	P0C6X7	P59641,Q6WGN0,Q7T697,Q808C0,Q80BV7,Q80BV8,Q80E51
50151726	OC(=O)C(=O)CC(=O)c1cccc(OCc2ccc(Cl)cc2)c1	InChI=1S/C17H13ClO5/c18-13-6-4-11(5-7-13)10-23-14-3-1-2-12(8-14)15(19)9-16(20)17(21)22/h1-8H,9-10H2,(H,21,22)	KDAOPAWDLZGMGF-UHFFFAOYSA-N	50258134	4-(3-(4-chlorobenzyloxy)phenyl)-2-hydroxy-4-oxobut-2-enoic acid::CHEMBL492771	3C-like proteinase (3CL-PRO)	Human SARS coronavirus		13600							ChEMBL	10.1016/j.bmcl.2009.02.010	19233643			Lee, C; Lee, JM; Lee, NR; Jin, BS; Jang, KJ; Kim, DE; Jeong, YJ; Chong, Y	Konkuk University	http://www.bindingdb.org/bind/chemsearch/marvin/MolStructure.jsp?monomerid=50258134	http://www.bindingdb.org/jsp/dbsearch/PrimarySearch_ki.jsp?energyterm=kJ/mole&tag=pol&polymerid=4753&target=3C-like+proteinase+%283CL-PRO%29&column=ki&startPg=0&Increment=50&submit=Search	http://www.bindingdb.org/jsp/dbsearch/PrimarySearch_ki.jsp?energyterm=kJ/mole&tag=r21&monomerid=50258134&enzyme=3C-like+proteinase+%283CL-PRO%29&column=ki&startPg=0&Increment=50&submit=Search			91935361	104108937		CHEMBL492771			C00972	ZINC40949756	1	MESLVLGVNEKTHVQLSLPVLQVRDVLVRGFGDSVEEALSEAREHLKNGTCGLVELEKGVLPQLEQPYVFIKRSDALSTNHGHKVVELVAEMDGIQYGRSGITLGVLVPHVGETPIAYRNVLLRKNGNKGAGGHSYGIDLKSYDLGDELGTDPIEDYEQNWNTKHGSGALRELTRELNGGAVTRYVDNNFCGPDGYPLDCIKDFLARAGKSMCTLSEQLDYIESKRGVYCCRDHEHEIAWFTERSDKSYEHQTPFEIKSAKKFDTFKGECPKFVFPLNSKVKVIQPRVEKKKTEGFMGRIRSVYPVASPQECNNMHLSTLMKCNHCDEVSWQTCDFLKATCEHCGTENLVIEGPTTCGYLPTNAVVKMPCPACQDPEIGPEHSVADYHNHSNIETRLRK…	1Q2W,1QZ8,1UJ1,1UK2,1UK3,1UK4,1UW7,1WOF,1Z1I,2A5A,2A5I,2A5K,2ACF,2AHM,2ALV,2AMD,2AMQ,2BX3,2BX4,2C3S,2D2D,2DUC,2FAV,2FE8,2FYG,2G9T,2GA6,2GDT,2GRI,2GT7,2GT8,2GTB,2GX4,2GZ7,2GZ8,2GZ9,2H2Z,2HOB,2HSX,2IDY,2JZF,2K7X,2K87,2KAF,2LIZ,2OP9,2OZK,2RNK,2V6N,2VJ1,2XYQ,2XYR,2XYV,2Z3C,2Z3D,2Z3E,2Z94,2Z9G,2Z9J,2Z9K,2Z9L,2ZU4,2ZU5,3D62,3E91,3E9S,3EA7,3EA8,3EBN,3IWM,3M3V,3MJ5,3R24,3SN8,3SNA,3SNB,3SNC,3SND,3SNE,3SZN…	Replicase polyprotein 1ab	R1AB_CVHSA	P0C6X7	P59641,Q6WGN0,Q7T697,Q808C0,Q80BV7,Q80BV8,Q80E51
50151727	OC(=O)C(=O)CC(=O)c1ccc(OCc2ccccc2)cc1	InChI=1S/C17H14O5/c18-15(10-16(19)17(20)21)13-6-8-14(9-7-13)22-11-12-4-2-1-3-5-12/h1-9H,10-11H2,(H,20,21)	KMRYXNIEUDTYAJ-UHFFFAOYSA-N	50258085	4-(4-(benzyloxy)phenyl)-2-hydroxy-4-oxobut-2-enoic acid::CHEMBL492768	3C-like proteinase (3CL-PRO)	Human SARS coronavirus		41300							ChEMBL	10.1016/j.bmcl.2009.02.010	19233643			Lee, C; Lee, JM; Lee, NR; Jin, BS; Jang, KJ; Kim, DE; Jeong, YJ; Chong, Y	Konkuk University	http://www.bindingdb.org/bind/chemsearch/marvin/MolStructure.jsp?monomerid=50258085	http://www.bindingdb.org/jsp/dbsearch/PrimarySearch_ki.jsp?energyterm=kJ/mole&tag=pol&polymerid=4753&target=3C-like+proteinase+%283CL-PRO%29&column=ki&startPg=0&Increment=50&submit=Search	http://www.bindingdb.org/jsp/dbsearch/PrimarySearch_ki.jsp?energyterm=kJ/mole&tag=r21&monomerid=50258085&enzyme=3C-like+proteinase+%283CL-PRO%29&column=ki&startPg=0&Increment=50&submit=Search			23090268	104108909		CHEMBL492768			C00972	ZINC40949462	1	MESLVLGVNEKTHVQLSLPVLQVRDVLVRGFGDSVEEALSEAREHLKNGTCGLVELEKGVLPQLEQPYVFIKRSDALSTNHGHKVVELVAEMDGIQYGRSGITLGVLVPHVGETPIAYRNVLLRKNGNKGAGGHSYGIDLKSYDLGDELGTDPIEDYEQNWNTKHGSGALRELTRELNGGAVTRYVDNNFCGPDGYPLDCIKDFLARAGKSMCTLSEQLDYIESKRGVYCCRDHEHEIAWFTERSDKSYEHQTPFEIKSAKKFDTFKGECPKFVFPLNSKVKVIQPRVEKKKTEGFMGRIRSVYPVASPQECNNMHLSTLMKCNHCDEVSWQTCDFLKATCEHCGTENLVIEGPTTCGYLPTNAVVKMPCPACQDPEIGPEHSVADYHNHSNIETRLRK…	1Q2W,1QZ8,1UJ1,1UK2,1UK3,1UK4,1UW7,1WOF,1Z1I,2A5A,2A5I,2A5K,2ACF,2AHM,2ALV,2AMD,2AMQ,2BX3,2BX4,2C3S,2D2D,2DUC,2FAV,2FE8,2FYG,2G9T,2GA6,2GDT,2GRI,2GT7,2GT8,2GTB,2GX4,2GZ7,2GZ8,2GZ9,2H2Z,2HOB,2HSX,2IDY,2JZF,2K7X,2K87,2KAF,2LIZ,2OP9,2OZK,2RNK,2V6N,2VJ1,2XYQ,2XYR,2XYV,2Z3C,2Z3D,2Z3E,2Z94,2Z9G,2Z9J,2Z9K,2Z9L,2ZU4,2ZU5,3D62,3E91,3E9S,3EA7,3EA8,3EBN,3IWM,3M3V,3MJ5,3R24,3SN8,3SNA,3SNB,3SNC,3SND,3SNE,3SZN…	Replicase polyprotein 1ab	R1AB_CVHSA	P0C6X7	P59641,Q6WGN0,Q7T697,Q808C0,Q80BV7,Q80BV8,Q80E51
50151728	OC(=O)C(=O)CC(=O)c1cccc(OCc2ccc(Cl)cc2)c1	InChI=1S/C17H13ClO5/c18-13-6-4-11(5-7-13)10-23-14-3-1-2-12(8-14)15(19)9-16(20)17(21)22/h1-8H,9-10H2,(H,21,22)	KDAOPAWDLZGMGF-UHFFFAOYSA-N	50258134	4-(3-(4-chlorobenzyloxy)phenyl)-2-hydroxy-4-oxobut-2-enoic acid::CHEMBL492771	3C-like proteinase (3CL-PRO)	Human SARS coronavirus		24400							ChEMBL	10.1016/j.bmcl.2009.02.010	19233643			Lee, C; Lee, JM; Lee, NR; Jin, BS; Jang, KJ; Kim, DE; Jeong, YJ; Chong, Y	Konkuk University	http://www.bindingdb.org/bind/chemsearch/marvin/MolStructure.jsp?monomerid=50258134	http://www.bindingdb.org/jsp/dbsearch/PrimarySearch_ki.jsp?energyterm=kJ/mole&tag=pol&polymerid=4753&target=3C-like+proteinase+%283CL-PRO%29&column=ki&startPg=0&Increment=50&submit=Search	http://www.bindingdb.org/jsp/dbsearch/PrimarySearch_ki.jsp?energyterm=kJ/mole&tag=r21&monomerid=50258134&enzyme=3C-like+proteinase+%283CL-PRO%29&column=ki&startPg=0&Increment=50&submit=Search			91935361	104108937		CHEMBL492771			C00972	ZINC40949756	1	MESLVLGVNEKTHVQLSLPVLQVRDVLVRGFGDSVEEALSEAREHLKNGTCGLVELEKGVLPQLEQPYVFIKRSDALSTNHGHKVVELVAEMDGIQYGRSGITLGVLVPHVGETPIAYRNVLLRKNGNKGAGGHSYGIDLKSYDLGDELGTDPIEDYEQNWNTKHGSGALRELTRELNGGAVTRYVDNNFCGPDGYPLDCIKDFLARAGKSMCTLSEQLDYIESKRGVYCCRDHEHEIAWFTERSDKSYEHQTPFEIKSAKKFDTFKGECPKFVFPLNSKVKVIQPRVEKKKTEGFMGRIRSVYPVASPQECNNMHLSTLMKCNHCDEVSWQTCDFLKATCEHCGTENLVIEGPTTCGYLPTNAVVKMPCPACQDPEIGPEHSVADYHNHSNIETRLRK…	1Q2W,1QZ8,1UJ1,1UK2,1UK3,1UK4,1UW7,1WOF,1Z1I,2A5A,2A5I,2A5K,2ACF,2AHM,2ALV,2AMD,2AMQ,2BX3,2BX4,2C3S,2D2D,2DUC,2FAV,2FE8,2FYG,2G9T,2GA6,2GDT,2GRI,2GT7,2GT8,2GTB,2GX4,2GZ7,2GZ8,2GZ9,2H2Z,2HOB,2HSX,2IDY,2JZF,2K7X,2K87,2KAF,2LIZ,2OP9,2OZK,2RNK,2V6N,2VJ1,2XYQ,2XYR,2XYV,2Z3C,2Z3D,2Z3E,2Z94,2Z9G,2Z9J,2Z9K,2Z9L,2ZU4,2ZU5,3D62,3E91,3E9S,3EA7,3EA8,3EBN,3IWM,3M3V,3MJ5,3R24,3SN8,3SNA,3SNB,3SNC,3SND,3SNE,3SZN…	Replicase polyprotein 1ab	R1AB_CVHSA	P0C6X7	P59641,Q6WGN0,Q7T697,Q808C0,Q80BV7,Q80BV8,Q80E51
50151729	OC(=O)C(=O)CC(=O)c1ccccc1OCc1ccccc1	InChI=1S/C17H14O5/c18-14(10-15(19)17(20)21)13-8-4-5-9-16(13)22-11-12-6-2-1-3-7-12/h1-9H,10-11H2,(H,20,21)	STKCEKDDIVPHDO-UHFFFAOYSA-N	50137878	4-(2-Benzyloxy-phenyl)-2,4-dioxo-butyric acid::4-[2-(benzyloxy)phenyl]-2,4-dioxobutanoic acid::CHEMBL199199::CHEMBL368481::CHEMBL499444	3C-like proteinase (3CL-PRO)	Human SARS coronavirus		>50000							ChEMBL	10.1016/j.bmcl.2009.02.010	19233643			Lee, C; Lee, JM; Lee, NR; Jin, BS; Jang, KJ; Kim, DE; Jeong, YJ; Chong, Y	Konkuk University	http://www.bindingdb.org/bind/chemsearch/marvin/MolStructure.jsp?monomerid=50137878	http://www.bindingdb.org/jsp/dbsearch/PrimarySearch_ki.jsp?energyterm=kJ/mole&tag=pol&polymerid=4753&target=3C-like+proteinase+%283CL-PRO%29&column=ki&startPg=0&Increment=50&submit=Search	http://www.bindingdb.org/jsp/dbsearch/PrimarySearch_ki.jsp?energyterm=kJ/mole&tag=r21&monomerid=50137878&enzyme=3C-like+proteinase+%283CL-PRO%29&column=ki&startPg=0&Increment=50&submit=Search			510646	104028021		CHEMBL199199CHEMBL499444CHEMBL368481			C00972	ZINC13674051	1	MESLVLGVNEKTHVQLSLPVLQVRDVLVRGFGDSVEEALSEAREHLKNGTCGLVELEKGVLPQLEQPYVFIKRSDALSTNHGHKVVELVAEMDGIQYGRSGITLGVLVPHVGETPIAYRNVLLRKNGNKGAGGHSYGIDLKSYDLGDELGTDPIEDYEQNWNTKHGSGALRELTRELNGGAVTRYVDNNFCGPDGYPLDCIKDFLARAGKSMCTLSEQLDYIESKRGVYCCRDHEHEIAWFTERSDKSYEHQTPFEIKSAKKFDTFKGECPKFVFPLNSKVKVIQPRVEKKKTEGFMGRIRSVYPVASPQECNNMHLSTLMKCNHCDEVSWQTCDFLKATCEHCGTENLVIEGPTTCGYLPTNAVVKMPCPACQDPEIGPEHSVADYHNHSNIETRLRK…	1Q2W,1QZ8,1UJ1,1UK2,1UK3,1UK4,1UW7,1WOF,1Z1I,2A5A,2A5I,2A5K,2ACF,2AHM,2ALV,2AMD,2AMQ,2BX3,2BX4,2C3S,2D2D,2DUC,2FAV,2FE8,2FYG,2G9T,2GA6,2GDT,2GRI,2GT7,2GT8,2GTB,2GX4,2GZ7,2GZ8,2GZ9,2H2Z,2HOB,2HSX,2IDY,2JZF,2K7X,2K87,2KAF,2LIZ,2OP9,2OZK,2RNK,2V6N,2VJ1,2XYQ,2XYR,2XYV,2Z3C,2Z3D,2Z3E,2Z94,2Z9G,2Z9J,2Z9K,2Z9L,2ZU4,2ZU5,3D62,3E91,3E9S,3EA7,3EA8,3EBN,3IWM,3M3V,3MJ5,3R24,3SN8,3SNA,3SNB,3SNC,3SND,3SNE,3SZN…	Replicase polyprotein 1ab	R1AB_CVHSA	P0C6X7	P59641,Q6WGN0,Q7T697,Q808C0,Q80BV7,Q80BV8,Q80E51
50151730	OC(=O)C(=O)CC(=O)c1ccccc1OCc1ccc(Cl)cc1	InChI=1S/C17H13ClO5/c18-12-7-5-11(6-8-12)10-23-16-4-2-1-3-13(16)14(19)9-15(20)17(21)22/h1-8H,9-10H2,(H,21,22)	FPKWTTGUQSRLMF-UHFFFAOYSA-N	50258136	4-(2-(4-chlorobenzyloxy)phenyl)-2-hydroxy-4-oxobut-2-enoic acid::CHEMBL492772	3C-like proteinase (3CL-PRO)	Human SARS coronavirus		28700							ChEMBL	10.1016/j.bmcl.2009.02.010	19233643			Lee, C; Lee, JM; Lee, NR; Jin, BS; Jang, KJ; Kim, DE; Jeong, YJ; Chong, Y	Konkuk University	http://www.bindingdb.org/bind/chemsearch/marvin/MolStructure.jsp?monomerid=50258136	http://www.bindingdb.org/jsp/dbsearch/PrimarySearch_ki.jsp?energyterm=kJ/mole&tag=pol&polymerid=4753&target=3C-like+proteinase+%283CL-PRO%29&column=ki&startPg=0&Increment=50&submit=Search	http://www.bindingdb.org/jsp/dbsearch/PrimarySearch_ki.jsp?energyterm=kJ/mole&tag=r21&monomerid=50258136&enzyme=3C-like+proteinase+%283CL-PRO%29&column=ki&startPg=0&Increment=50&submit=Search			91935362	104108939		CHEMBL492772			C00972	ZINC40949758	1	MESLVLGVNEKTHVQLSLPVLQVRDVLVRGFGDSVEEALSEAREHLKNGTCGLVELEKGVLPQLEQPYVFIKRSDALSTNHGHKVVELVAEMDGIQYGRSGITLGVLVPHVGETPIAYRNVLLRKNGNKGAGGHSYGIDLKSYDLGDELGTDPIEDYEQNWNTKHGSGALRELTRELNGGAVTRYVDNNFCGPDGYPLDCIKDFLARAGKSMCTLSEQLDYIESKRGVYCCRDHEHEIAWFTERSDKSYEHQTPFEIKSAKKFDTFKGECPKFVFPLNSKVKVIQPRVEKKKTEGFMGRIRSVYPVASPQECNNMHLSTLMKCNHCDEVSWQTCDFLKATCEHCGTENLVIEGPTTCGYLPTNAVVKMPCPACQDPEIGPEHSVADYHNHSNIETRLRK…	1Q2W,1QZ8,1UJ1,1UK2,1UK3,1UK4,1UW7,1WOF,1Z1I,2A5A,2A5I,2A5K,2ACF,2AHM,2ALV,2AMD,2AMQ,2BX3,2BX4,2C3S,2D2D,2DUC,2FAV,2FE8,2FYG,2G9T,2GA6,2GDT,2GRI,2GT7,2GT8,2GTB,2GX4,2GZ7,2GZ8,2GZ9,2H2Z,2HOB,2HSX,2IDY,2JZF,2K7X,2K87,2KAF,2LIZ,2OP9,2OZK,2RNK,2V6N,2VJ1,2XYQ,2XYR,2XYV,2Z3C,2Z3D,2Z3E,2Z94,2Z9G,2Z9J,2Z9K,2Z9L,2ZU4,2ZU5,3D62,3E91,3E9S,3EA7,3EA8,3EBN,3IWM,3M3V,3MJ5,3R24,3SN8,3SNA,3SNB,3SNC,3SND,3SNE,3SZN…	Replicase polyprotein 1ab	R1AB_CVHSA	P0C6X7	P59641,Q6WGN0,Q7T697,Q808C0,Q80BV7,Q80BV8,Q80E51
50151731	OC(=O)C(=O)CC(=O)c1cccc(OCc2ccccc2)c1	InChI=1S/C17H14O5/c18-15(10-16(19)17(20)21)13-7-4-8-14(9-13)22-11-12-5-2-1-3-6-12/h1-9H,10-11H2,(H,20,21)	FCBLTJFBERTVBY-UHFFFAOYSA-N	50115572	(Z)-4-(3-Benzyloxy-phenyl)-2-hydroxy-4-oxo-but-2-enoic acid::4-(3-Benzyloxy-phenyl)-2-hydroxy-4-oxo-but-2-enoic acid::CHEMBL108253::CHEMBL18927::CHEMBL492770	3C-like proteinase (3CL-PRO)	Human SARS coronavirus		>50000							ChEMBL	10.1016/j.bmcl.2009.02.010	19233643			Lee, C; Lee, JM; Lee, NR; Jin, BS; Jang, KJ; Kim, DE; Jeong, YJ; Chong, Y	Konkuk University	http://www.bindingdb.org/bind/chemsearch/marvin/MolStructure.jsp?monomerid=50115572	http://www.bindingdb.org/jsp/dbsearch/PrimarySearch_ki.jsp?energyterm=kJ/mole&tag=pol&polymerid=4753&target=3C-like+proteinase+%283CL-PRO%29&column=ki&startPg=0&Increment=50&submit=Search	http://www.bindingdb.org/jsp/dbsearch/PrimarySearch_ki.jsp?energyterm=kJ/mole&tag=r21&monomerid=50115572&enzyme=3C-like+proteinase+%283CL-PRO%29&column=ki&startPg=0&Increment=50&submit=Search			493415	104009487		CHEMBL108253CHEMBL492770CHEMBL18927			C00972	ZINC13488694	1	MESLVLGVNEKTHVQLSLPVLQVRDVLVRGFGDSVEEALSEAREHLKNGTCGLVELEKGVLPQLEQPYVFIKRSDALSTNHGHKVVELVAEMDGIQYGRSGITLGVLVPHVGETPIAYRNVLLRKNGNKGAGGHSYGIDLKSYDLGDELGTDPIEDYEQNWNTKHGSGALRELTRELNGGAVTRYVDNNFCGPDGYPLDCIKDFLARAGKSMCTLSEQLDYIESKRGVYCCRDHEHEIAWFTERSDKSYEHQTPFEIKSAKKFDTFKGECPKFVFPLNSKVKVIQPRVEKKKTEGFMGRIRSVYPVASPQECNNMHLSTLMKCNHCDEVSWQTCDFLKATCEHCGTENLVIEGPTTCGYLPTNAVVKMPCPACQDPEIGPEHSVADYHNHSNIETRLRK…	1Q2W,1QZ8,1UJ1,1UK2,1UK3,1UK4,1UW7,1WOF,1Z1I,2A5A,2A5I,2A5K,2ACF,2AHM,2ALV,2AMD,2AMQ,2BX3,2BX4,2C3S,2D2D,2DUC,2FAV,2FE8,2FYG,2G9T,2GA6,2GDT,2GRI,2GT7,2GT8,2GTB,2GX4,2GZ7,2GZ8,2GZ9,2H2Z,2HOB,2HSX,2IDY,2JZF,2K7X,2K87,2KAF,2LIZ,2OP9,2OZK,2RNK,2V6N,2VJ1,2XYQ,2XYR,2XYV,2Z3C,2Z3D,2Z3E,2Z94,2Z9G,2Z9J,2Z9K,2Z9L,2ZU4,2ZU5,3D62,3E91,3E9S,3EA7,3EA8,3EBN,3IWM,3M3V,3MJ5,3R24,3SN8,3SNA,3SNB,3SNC,3SND,3SNE,3SZN…	Replicase polyprotein 1ab	R1AB_CVHSA	P0C6X7	P59641,Q6WGN0,Q7T697,Q808C0,Q80BV7,Q80BV8,Q80E51
50151732	OC(=O)C(=O)CC(=O)c1cccc(NCc2ccccc2)c1	InChI=1S/C17H15NO4/c19-15(10-16(20)17(21)22)13-7-4-8-14(9-13)18-11-12-5-2-1-3-6-12/h1-9,18H,10-11H2,(H,21,22)	SPMMLCCLNJGITG-UHFFFAOYSA-N	50137863	4-(3-Benzylamino-phenyl)-2,4-dioxo-butyric acid::CHEMBL367740::CHEMBL371719::CHEMBL492571	3C-like proteinase (3CL-PRO)	Human SARS coronavirus		5400							ChEMBL	10.1016/j.bmcl.2009.02.010	19233643			Lee, C; Lee, JM; Lee, NR; Jin, BS; Jang, KJ; Kim, DE; Jeong, YJ; Chong, Y	Konkuk University	http://www.bindingdb.org/bind/chemsearch/marvin/MolStructure.jsp?monomerid=50137863	http://www.bindingdb.org/jsp/dbsearch/PrimarySearch_ki.jsp?energyterm=kJ/mole&tag=pol&polymerid=4753&target=3C-like+proteinase+%283CL-PRO%29&column=ki&startPg=0&Increment=50&submit=Search	http://www.bindingdb.org/jsp/dbsearch/PrimarySearch_ki.jsp?energyterm=kJ/mole&tag=r21&monomerid=50137863&enzyme=3C-like+proteinase+%283CL-PRO%29&column=ki&startPg=0&Increment=50&submit=Search			510665	104028006		CHEMBL492571CHEMBL371719CHEMBL367740			C00972	ZINC13531973	1	MESLVLGVNEKTHVQLSLPVLQVRDVLVRGFGDSVEEALSEAREHLKNGTCGLVELEKGVLPQLEQPYVFIKRSDALSTNHGHKVVELVAEMDGIQYGRSGITLGVLVPHVGETPIAYRNVLLRKNGNKGAGGHSYGIDLKSYDLGDELGTDPIEDYEQNWNTKHGSGALRELTRELNGGAVTRYVDNNFCGPDGYPLDCIKDFLARAGKSMCTLSEQLDYIESKRGVYCCRDHEHEIAWFTERSDKSYEHQTPFEIKSAKKFDTFKGECPKFVFPLNSKVKVIQPRVEKKKTEGFMGRIRSVYPVASPQECNNMHLSTLMKCNHCDEVSWQTCDFLKATCEHCGTENLVIEGPTTCGYLPTNAVVKMPCPACQDPEIGPEHSVADYHNHSNIETRLRK…	1Q2W,1QZ8,1UJ1,1UK2,1UK3,1UK4,1UW7,1WOF,1Z1I,2A5A,2A5I,2A5K,2ACF,2AHM,2ALV,2AMD,2AMQ,2BX3,2BX4,2C3S,2D2D,2DUC,2FAV,2FE8,2FYG,2G9T,2GA6,2GDT,2GRI,2GT7,2GT8,2GTB,2GX4,2GZ7,2GZ8,2GZ9,2H2Z,2HOB,2HSX,2IDY,2JZF,2K7X,2K87,2KAF,2LIZ,2OP9,2OZK,2RNK,2V6N,2VJ1,2XYQ,2XYR,2XYV,2Z3C,2Z3D,2Z3E,2Z94,2Z9G,2Z9J,2Z9K,2Z9L,2ZU4,2ZU5,3D62,3E91,3E9S,3EA7,3EA8,3EBN,3IWM,3M3V,3MJ5,3R24,3SN8,3SNA,3SNB,3SNC,3SND,3SNE,3SZN…	Replicase polyprotein 1ab	R1AB_CVHSA	P0C6X7	P59641,Q6WGN0,Q7T697,Q808C0,Q80BV7,Q80BV8,Q80E51
50151733	OC(=O)C(=O)CC(=O)c1ccc(OCc2ccc(Cl)cc2)cc1	InChI=1S/C17H13ClO5/c18-13-5-1-11(2-6-13)10-23-14-7-3-12(4-8-14)15(19)9-16(20)17(21)22/h1-8H,9-10H2,(H,21,22)	VNFJWPKQPJOPAE-UHFFFAOYSA-N	50258132	4-(4-(4-chlorobenzyloxy)phenyl)-2-hydroxy-4-oxobut-2-enoic acid::CHEMBL492769	3C-like proteinase (3CL-PRO)	Human SARS coronavirus		>50000							ChEMBL	10.1016/j.bmcl.2009.02.010	19233643			Lee, C; Lee, JM; Lee, NR; Jin, BS; Jang, KJ; Kim, DE; Jeong, YJ; Chong, Y	Konkuk University	http://www.bindingdb.org/bind/chemsearch/marvin/MolStructure.jsp?monomerid=50258132	http://www.bindingdb.org/jsp/dbsearch/PrimarySearch_ki.jsp?energyterm=kJ/mole&tag=pol&polymerid=4753&target=3C-like+proteinase+%283CL-PRO%29&column=ki&startPg=0&Increment=50&submit=Search	http://www.bindingdb.org/jsp/dbsearch/PrimarySearch_ki.jsp?energyterm=kJ/mole&tag=r21&monomerid=50258132&enzyme=3C-like+proteinase+%283CL-PRO%29&column=ki&startPg=0&Increment=50&submit=Search			91935360	104108935		CHEMBL492769			C00972	ZINC40949754	1	MESLVLGVNEKTHVQLSLPVLQVRDVLVRGFGDSVEEALSEAREHLKNGTCGLVELEKGVLPQLEQPYVFIKRSDALSTNHGHKVVELVAEMDGIQYGRSGITLGVLVPHVGETPIAYRNVLLRKNGNKGAGGHSYGIDLKSYDLGDELGTDPIEDYEQNWNTKHGSGALRELTRELNGGAVTRYVDNNFCGPDGYPLDCIKDFLARAGKSMCTLSEQLDYIESKRGVYCCRDHEHEIAWFTERSDKSYEHQTPFEIKSAKKFDTFKGECPKFVFPLNSKVKVIQPRVEKKKTEGFMGRIRSVYPVASPQECNNMHLSTLMKCNHCDEVSWQTCDFLKATCEHCGTENLVIEGPTTCGYLPTNAVVKMPCPACQDPEIGPEHSVADYHNHSNIETRLRK…	1Q2W,1QZ8,1UJ1,1UK2,1UK3,1UK4,1UW7,1WOF,1Z1I,2A5A,2A5I,2A5K,2ACF,2AHM,2ALV,2AMD,2AMQ,2BX3,2BX4,2C3S,2D2D,2DUC,2FAV,2FE8,2FYG,2G9T,2GA6,2GDT,2GRI,2GT7,2GT8,2GTB,2GX4,2GZ7,2GZ8,2GZ9,2H2Z,2HOB,2HSX,2IDY,2JZF,2K7X,2K87,2KAF,2LIZ,2OP9,2OZK,2RNK,2V6N,2VJ1,2XYQ,2XYR,2XYV,2Z3C,2Z3D,2Z3E,2Z94,2Z9G,2Z9J,2Z9K,2Z9L,2ZU4,2ZU5,3D62,3E91,3E9S,3EA7,3EA8,3EBN,3IWM,3M3V,3MJ5,3R24,3SN8,3SNA,3SNB,3SNC,3SND,3SNE,3SZN…	Replicase polyprotein 1ab	R1AB_CVHSA	P0C6X7	P59641,Q6WGN0,Q7T697,Q808C0,Q80BV7,Q80BV8,Q80E51
50151734	OC(=O)C(=O)CC(=O)c1cccc(NCc2ccc(Cl)cc2)c1	InChI=1S/C17H14ClNO4/c18-13-6-4-11(5-7-13)10-19-14-3-1-2-12(8-14)15(20)9-16(21)17(22)23/h1-8,19H,9-10H2,(H,22,23)	LXCYOKXQXCRNRS-UHFFFAOYSA-N	50258183	4-(3-(4-chlorobenzylamino)phenyl)-2-hydroxy-4-oxobut-2-enoic acid::CHEMBL522710	3C-like proteinase (3CL-PRO)	Human SARS coronavirus		11000							ChEMBL	10.1016/j.bmcl.2009.02.010	19233643			Lee, C; Lee, JM; Lee, NR; Jin, BS; Jang, KJ; Kim, DE; Jeong, YJ; Chong, Y	Konkuk University	http://www.bindingdb.org/bind/chemsearch/marvin/MolStructure.jsp?monomerid=50258183	http://www.bindingdb.org/jsp/dbsearch/PrimarySearch_ki.jsp?energyterm=kJ/mole&tag=pol&polymerid=4753&target=3C-like+proteinase+%283CL-PRO%29&column=ki&startPg=0&Increment=50&submit=Search	http://www.bindingdb.org/jsp/dbsearch/PrimarySearch_ki.jsp?energyterm=kJ/mole&tag=r21&monomerid=50258183&enzyme=3C-like+proteinase+%283CL-PRO%29&column=ki&startPg=0&Increment=50&submit=Search			91935363	104108967		CHEMBL522710			C00972	ZINC40955733	1	MESLVLGVNEKTHVQLSLPVLQVRDVLVRGFGDSVEEALSEAREHLKNGTCGLVELEKGVLPQLEQPYVFIKRSDALSTNHGHKVVELVAEMDGIQYGRSGITLGVLVPHVGETPIAYRNVLLRKNGNKGAGGHSYGIDLKSYDLGDELGTDPIEDYEQNWNTKHGSGALRELTRELNGGAVTRYVDNNFCGPDGYPLDCIKDFLARAGKSMCTLSEQLDYIESKRGVYCCRDHEHEIAWFTERSDKSYEHQTPFEIKSAKKFDTFKGECPKFVFPLNSKVKVIQPRVEKKKTEGFMGRIRSVYPVASPQECNNMHLSTLMKCNHCDEVSWQTCDFLKATCEHCGTENLVIEGPTTCGYLPTNAVVKMPCPACQDPEIGPEHSVADYHNHSNIETRLRK…	1Q2W,1QZ8,1UJ1,1UK2,1UK3,1UK4,1UW7,1WOF,1Z1I,2A5A,2A5I,2A5K,2ACF,2AHM,2ALV,2AMD,2AMQ,2BX3,2BX4,2C3S,2D2D,2DUC,2FAV,2FE8,2FYG,2G9T,2GA6,2GDT,2GRI,2GT7,2GT8,2GTB,2GX4,2GZ7,2GZ8,2GZ9,2H2Z,2HOB,2HSX,2IDY,2JZF,2K7X,2K87,2KAF,2LIZ,2OP9,2OZK,2RNK,2V6N,2VJ1,2XYQ,2XYR,2XYV,2Z3C,2Z3D,2Z3E,2Z94,2Z9G,2Z9J,2Z9K,2Z9L,2ZU4,2ZU5,3D62,3E91,3E9S,3EA7,3EA8,3EBN,3IWM,3M3V,3MJ5,3R24,3SN8,3SNA,3SNB,3SNC,3SND,3SNE,3SZN…	Replicase polyprotein 1ab	R1AB_CVHSA	P0C6X7	P59641,Q6WGN0,Q7T697,Q808C0,Q80BV7,Q80BV8,Q80E51
50155213	Oc1cc(OCc2cccc(Cl)c2)cc2oc(c(O)c(=O)c12)-c1ccc2OCOc2c1	InChI=1S/C23H15ClO7/c24-14-3-1-2-12(6-14)10-28-15-8-16(25)20-19(9-15)31-23(22(27)21(20)26)13-4-5-17-18(7-13)30-11-29-17/h1-9,25,27H,10-11H2	RLDACGCZSLOROC-UHFFFAOYSA-N	50297256	2-Benzo[1,3]dioxol-5-yl-7-(3-chloro-benzyloxy)-3,5-dihydroxy-chromen-4-one::CHEMBL560933	3C-like proteinase (3CL-PRO)	Human SARS coronavirus		>50000							ChEMBL	10.1016/j.bmcl.2009.07.009	19625187			Lee, C; Lee, JM; Lee, NR; Kim, DE; Jeong, YJ; Chong, Y	Konkuk University	http://www.bindingdb.org/bind/chemsearch/marvin/MolStructure.jsp?monomerid=50297256	http://www.bindingdb.org/jsp/dbsearch/PrimarySearch_ki.jsp?energyterm=kJ/mole&tag=pol&polymerid=4753&target=3C-like+proteinase+%283CL-PRO%29&column=ki&startPg=0&Increment=50&submit=Search	http://www.bindingdb.org/jsp/dbsearch/PrimarySearch_ki.jsp?energyterm=kJ/mole&tag=r21&monomerid=50297256&enzyme=3C-like+proteinase+%283CL-PRO%29&column=ki&startPg=0&Increment=50&submit=Search			45268452	104138787		CHEMBL560933				ZINC43120081	1	MESLVLGVNEKTHVQLSLPVLQVRDVLVRGFGDSVEEALSEAREHLKNGTCGLVELEKGVLPQLEQPYVFIKRSDALSTNHGHKVVELVAEMDGIQYGRSGITLGVLVPHVGETPIAYRNVLLRKNGNKGAGGHSYGIDLKSYDLGDELGTDPIEDYEQNWNTKHGSGALRELTRELNGGAVTRYVDNNFCGPDGYPLDCIKDFLARAGKSMCTLSEQLDYIESKRGVYCCRDHEHEIAWFTERSDKSYEHQTPFEIKSAKKFDTFKGECPKFVFPLNSKVKVIQPRVEKKKTEGFMGRIRSVYPVASPQECNNMHLSTLMKCNHCDEVSWQTCDFLKATCEHCGTENLVIEGPTTCGYLPTNAVVKMPCPACQDPEIGPEHSVADYHNHSNIETRLRK…	1Q2W,1QZ8,1UJ1,1UK2,1UK3,1UK4,1UW7,1WOF,1Z1I,2A5A,2A5I,2A5K,2ACF,2AHM,2ALV,2AMD,2AMQ,2BX3,2BX4,2C3S,2D2D,2DUC,2FAV,2FE8,2FYG,2G9T,2GA6,2GDT,2GRI,2GT7,2GT8,2GTB,2GX4,2GZ7,2GZ8,2GZ9,2H2Z,2HOB,2HSX,2IDY,2JZF,2K7X,2K87,2KAF,2LIZ,2OP9,2OZK,2RNK,2V6N,2VJ1,2XYQ,2XYR,2XYV,2Z3C,2Z3D,2Z3E,2Z94,2Z9G,2Z9J,2Z9K,2Z9L,2ZU4,2ZU5,3D62,3E91,3E9S,3EA7,3EA8,3EBN,3IWM,3M3V,3MJ5,3R24,3SN8,3SNA,3SNB,3SNC,3SND,3SNE,3SZN…	Replicase polyprotein 1ab	R1AB_CVHSA	P0C6X7	P59641,Q6WGN0,Q7T697,Q808C0,Q80BV7,Q80BV8,Q80E51
50155214	Oc1cc(OCc2cccc(Cl)c2)cc2oc(c(O)c(=O)c12)-c1ccc2OCOc2c1	InChI=1S/C23H15ClO7/c24-14-3-1-2-12(6-14)10-28-15-8-16(25)20-19(9-15)31-23(22(27)21(20)26)13-4-5-17-18(7-13)30-11-29-17/h1-9,25,27H,10-11H2	RLDACGCZSLOROC-UHFFFAOYSA-N	50297256	2-Benzo[1,3]dioxol-5-yl-7-(3-chloro-benzyloxy)-3,5-dihydroxy-chromen-4-one::CHEMBL560933	3C-like proteinase (3CL-PRO)	Human SARS coronavirus		15400							ChEMBL	10.1016/j.bmcl.2009.07.009	19625187			Lee, C; Lee, JM; Lee, NR; Kim, DE; Jeong, YJ; Chong, Y	Konkuk University	http://www.bindingdb.org/bind/chemsearch/marvin/MolStructure.jsp?monomerid=50297256	http://www.bindingdb.org/jsp/dbsearch/PrimarySearch_ki.jsp?energyterm=kJ/mole&tag=pol&polymerid=4753&target=3C-like+proteinase+%283CL-PRO%29&column=ki&startPg=0&Increment=50&submit=Search	http://www.bindingdb.org/jsp/dbsearch/PrimarySearch_ki.jsp?energyterm=kJ/mole&tag=r21&monomerid=50297256&enzyme=3C-like+proteinase+%283CL-PRO%29&column=ki&startPg=0&Increment=50&submit=Search			45268452	104138787		CHEMBL560933				ZINC43120081	1	MESLVLGVNEKTHVQLSLPVLQVRDVLVRGFGDSVEEALSEAREHLKNGTCGLVELEKGVLPQLEQPYVFIKRSDALSTNHGHKVVELVAEMDGIQYGRSGITLGVLVPHVGETPIAYRNVLLRKNGNKGAGGHSYGIDLKSYDLGDELGTDPIEDYEQNWNTKHGSGALRELTRELNGGAVTRYVDNNFCGPDGYPLDCIKDFLARAGKSMCTLSEQLDYIESKRGVYCCRDHEHEIAWFTERSDKSYEHQTPFEIKSAKKFDTFKGECPKFVFPLNSKVKVIQPRVEKKKTEGFMGRIRSVYPVASPQECNNMHLSTLMKCNHCDEVSWQTCDFLKATCEHCGTENLVIEGPTTCGYLPTNAVVKMPCPACQDPEIGPEHSVADYHNHSNIETRLRK…	1Q2W,1QZ8,1UJ1,1UK2,1UK3,1UK4,1UW7,1WOF,1Z1I,2A5A,2A5I,2A5K,2ACF,2AHM,2ALV,2AMD,2AMQ,2BX3,2BX4,2C3S,2D2D,2DUC,2FAV,2FE8,2FYG,2G9T,2GA6,2GDT,2GRI,2GT7,2GT8,2GTB,2GX4,2GZ7,2GZ8,2GZ9,2H2Z,2HOB,2HSX,2IDY,2JZF,2K7X,2K87,2KAF,2LIZ,2OP9,2OZK,2RNK,2V6N,2VJ1,2XYQ,2XYR,2XYV,2Z3C,2Z3D,2Z3E,2Z94,2Z9G,2Z9J,2Z9K,2Z9L,2ZU4,2ZU5,3D62,3E91,3E9S,3EA7,3EA8,3EBN,3IWM,3M3V,3MJ5,3R24,3SN8,3SNA,3SNB,3SNC,3SND,3SNE,3SZN…	Replicase polyprotein 1ab	R1AB_CVHSA	P0C6X7	P59641,Q6WGN0,Q7T697,Q808C0,Q80BV7,Q80BV8,Q80E51
50155215	Oc1ccc(cc1O)-c1oc2cc(OCc3ccc(Cl)cc3)cc(O)c2c(=O)c1O	InChI=1S/C22H15ClO7/c23-13-4-1-11(2-5-13)10-29-14-8-17(26)19-18(9-14)30-22(21(28)20(19)27)12-3-6-15(24)16(25)7-12/h1-9,24-26,28H,10H2	BYQBMIHQROWCQG-UHFFFAOYSA-N	50297252	7-(4-Chloro-benzyloxy)-2-(3,4-dihydroxy-phenyl)-3,5-dihydroxy-chromen-4-one::CHEMBL550256	3C-like proteinase (3CL-PRO)	Human SARS coronavirus		20900							ChEMBL	10.1016/j.bmcl.2009.07.009	19625187			Lee, C; Lee, JM; Lee, NR; Kim, DE; Jeong, YJ; Chong, Y	Konkuk University	http://www.bindingdb.org/bind/chemsearch/marvin/MolStructure.jsp?monomerid=50297252	http://www.bindingdb.org/jsp/dbsearch/PrimarySearch_ki.jsp?energyterm=kJ/mole&tag=pol&polymerid=4753&target=3C-like+proteinase+%283CL-PRO%29&column=ki&startPg=0&Increment=50&submit=Search	http://www.bindingdb.org/jsp/dbsearch/PrimarySearch_ki.jsp?energyterm=kJ/mole&tag=r21&monomerid=50297252&enzyme=3C-like+proteinase+%283CL-PRO%29&column=ki&startPg=0&Increment=50&submit=Search			45270979	104138783		CHEMBL550256				ZINC43012025	1	MESLVLGVNEKTHVQLSLPVLQVRDVLVRGFGDSVEEALSEAREHLKNGTCGLVELEKGVLPQLEQPYVFIKRSDALSTNHGHKVVELVAEMDGIQYGRSGITLGVLVPHVGETPIAYRNVLLRKNGNKGAGGHSYGIDLKSYDLGDELGTDPIEDYEQNWNTKHGSGALRELTRELNGGAVTRYVDNNFCGPDGYPLDCIKDFLARAGKSMCTLSEQLDYIESKRGVYCCRDHEHEIAWFTERSDKSYEHQTPFEIKSAKKFDTFKGECPKFVFPLNSKVKVIQPRVEKKKTEGFMGRIRSVYPVASPQECNNMHLSTLMKCNHCDEVSWQTCDFLKATCEHCGTENLVIEGPTTCGYLPTNAVVKMPCPACQDPEIGPEHSVADYHNHSNIETRLRK…	1Q2W,1QZ8,1UJ1,1UK2,1UK3,1UK4,1UW7,1WOF,1Z1I,2A5A,2A5I,2A5K,2ACF,2AHM,2ALV,2AMD,2AMQ,2BX3,2BX4,2C3S,2D2D,2DUC,2FAV,2FE8,2FYG,2G9T,2GA6,2GDT,2GRI,2GT7,2GT8,2GTB,2GX4,2GZ7,2GZ8,2GZ9,2H2Z,2HOB,2HSX,2IDY,2JZF,2K7X,2K87,2KAF,2LIZ,2OP9,2OZK,2RNK,2V6N,2VJ1,2XYQ,2XYR,2XYV,2Z3C,2Z3D,2Z3E,2Z94,2Z9G,2Z9J,2Z9K,2Z9L,2ZU4,2ZU5,3D62,3E91,3E9S,3EA7,3EA8,3EBN,3IWM,3M3V,3MJ5,3R24,3SN8,3SNA,3SNB,3SNC,3SND,3SNE,3SZN…	Replicase polyprotein 1ab	R1AB_CVHSA	P0C6X7	P59641,Q6WGN0,Q7T697,Q808C0,Q80BV7,Q80BV8,Q80E51
50155216	Oc1ccc(cc1O)-c1oc2cc(OCc3cccc(c3)C#N)cc(O)c2c(=O)c1O	InChI=1S/C23H15NO7/c24-10-12-2-1-3-13(6-12)11-30-15-8-18(27)20-19(9-15)31-23(22(29)21(20)28)14-4-5-16(25)17(26)7-14/h1-9,25-27,29H,11H2	JBMZSOUKPAAEJU-UHFFFAOYSA-N	50297254	3-[2-(3,4-Dihydroxy-phenyl)-3,5-dihydroxy-4-oxo-4H-chromen-7-yloxymethyl]-benzonitrile::CHEMBL551131	3C-like proteinase (3CL-PRO)	Human SARS coronavirus		25400							ChEMBL	10.1016/j.bmcl.2009.07.009	19625187			Lee, C; Lee, JM; Lee, NR; Kim, DE; Jeong, YJ; Chong, Y	Konkuk University	http://www.bindingdb.org/bind/chemsearch/marvin/MolStructure.jsp?monomerid=50297254	http://www.bindingdb.org/jsp/dbsearch/PrimarySearch_ki.jsp?energyterm=kJ/mole&tag=pol&polymerid=4753&target=3C-like+proteinase+%283CL-PRO%29&column=ki&startPg=0&Increment=50&submit=Search	http://www.bindingdb.org/jsp/dbsearch/PrimarySearch_ki.jsp?energyterm=kJ/mole&tag=r21&monomerid=50297254&enzyme=3C-like+proteinase+%283CL-PRO%29&column=ki&startPg=0&Increment=50&submit=Search			44517748	104138785		CHEMBL551131				ZINC43011508	1	MESLVLGVNEKTHVQLSLPVLQVRDVLVRGFGDSVEEALSEAREHLKNGTCGLVELEKGVLPQLEQPYVFIKRSDALSTNHGHKVVELVAEMDGIQYGRSGITLGVLVPHVGETPIAYRNVLLRKNGNKGAGGHSYGIDLKSYDLGDELGTDPIEDYEQNWNTKHGSGALRELTRELNGGAVTRYVDNNFCGPDGYPLDCIKDFLARAGKSMCTLSEQLDYIESKRGVYCCRDHEHEIAWFTERSDKSYEHQTPFEIKSAKKFDTFKGECPKFVFPLNSKVKVIQPRVEKKKTEGFMGRIRSVYPVASPQECNNMHLSTLMKCNHCDEVSWQTCDFLKATCEHCGTENLVIEGPTTCGYLPTNAVVKMPCPACQDPEIGPEHSVADYHNHSNIETRLRK…	1Q2W,1QZ8,1UJ1,1UK2,1UK3,1UK4,1UW7,1WOF,1Z1I,2A5A,2A5I,2A5K,2ACF,2AHM,2ALV,2AMD,2AMQ,2BX3,2BX4,2C3S,2D2D,2DUC,2FAV,2FE8,2FYG,2G9T,2GA6,2GDT,2GRI,2GT7,2GT8,2GTB,2GX4,2GZ7,2GZ8,2GZ9,2H2Z,2HOB,2HSX,2IDY,2JZF,2K7X,2K87,2KAF,2LIZ,2OP9,2OZK,2RNK,2V6N,2VJ1,2XYQ,2XYR,2XYV,2Z3C,2Z3D,2Z3E,2Z94,2Z9G,2Z9J,2Z9K,2Z9L,2ZU4,2ZU5,3D62,3E91,3E9S,3EA7,3EA8,3EBN,3IWM,3M3V,3MJ5,3R24,3SN8,3SNA,3SNB,3SNC,3SND,3SNE,3SZN…	Replicase polyprotein 1ab	R1AB_CVHSA	P0C6X7	P59641,Q6WGN0,Q7T697,Q808C0,Q80BV7,Q80BV8,Q80E51
50155217	Oc1ccc(cc1O)-c1oc2cc(OCc3cccc(Cl)c3)cc(O)c2c(=O)c1O	InChI=1S/C22H15ClO7/c23-13-3-1-2-11(6-13)10-29-14-8-17(26)19-18(9-14)30-22(21(28)20(19)27)12-4-5-15(24)16(25)7-12/h1-9,24-26,28H,10H2	BIVPHUOIFUDUSK-UHFFFAOYSA-N	50297253	7-(3-Chloro-benzyloxy)-2-(3,4-dihydroxy-phenyl)-3,5-dihydroxy-chromen-4-one::CHEMBL551130	3C-like proteinase (3CL-PRO)	Human SARS coronavirus		>50000							ChEMBL	10.1016/j.bmcl.2009.07.009	19625187			Lee, C; Lee, JM; Lee, NR; Kim, DE; Jeong, YJ; Chong, Y	Konkuk University	http://www.bindingdb.org/bind/chemsearch/marvin/MolStructure.jsp?monomerid=50297253	http://www.bindingdb.org/jsp/dbsearch/PrimarySearch_ki.jsp?energyterm=kJ/mole&tag=pol&polymerid=4753&target=3C-like+proteinase+%283CL-PRO%29&column=ki&startPg=0&Increment=50&submit=Search	http://www.bindingdb.org/jsp/dbsearch/PrimarySearch_ki.jsp?energyterm=kJ/mole&tag=r21&monomerid=50297253&enzyme=3C-like+proteinase+%283CL-PRO%29&column=ki&startPg=0&Increment=50&submit=Search			45271826	104138784		CHEMBL551130				ZINC43065223	1	MESLVLGVNEKTHVQLSLPVLQVRDVLVRGFGDSVEEALSEAREHLKNGTCGLVELEKGVLPQLEQPYVFIKRSDALSTNHGHKVVELVAEMDGIQYGRSGITLGVLVPHVGETPIAYRNVLLRKNGNKGAGGHSYGIDLKSYDLGDELGTDPIEDYEQNWNTKHGSGALRELTRELNGGAVTRYVDNNFCGPDGYPLDCIKDFLARAGKSMCTLSEQLDYIESKRGVYCCRDHEHEIAWFTERSDKSYEHQTPFEIKSAKKFDTFKGECPKFVFPLNSKVKVIQPRVEKKKTEGFMGRIRSVYPVASPQECNNMHLSTLMKCNHCDEVSWQTCDFLKATCEHCGTENLVIEGPTTCGYLPTNAVVKMPCPACQDPEIGPEHSVADYHNHSNIETRLRK…	1Q2W,1QZ8,1UJ1,1UK2,1UK3,1UK4,1UW7,1WOF,1Z1I,2A5A,2A5I,2A5K,2ACF,2AHM,2ALV,2AMD,2AMQ,2BX3,2BX4,2C3S,2D2D,2DUC,2FAV,2FE8,2FYG,2G9T,2GA6,2GDT,2GRI,2GT7,2GT8,2GTB,2GX4,2GZ7,2GZ8,2GZ9,2H2Z,2HOB,2HSX,2IDY,2JZF,2K7X,2K87,2KAF,2LIZ,2OP9,2OZK,2RNK,2V6N,2VJ1,2XYQ,2XYR,2XYV,2Z3C,2Z3D,2Z3E,2Z94,2Z9G,2Z9J,2Z9K,2Z9L,2ZU4,2ZU5,3D62,3E91,3E9S,3EA7,3EA8,3EBN,3IWM,3M3V,3MJ5,3R24,3SN8,3SNA,3SNB,3SNC,3SND,3SNE,3SZN…	Replicase polyprotein 1ab	R1AB_CVHSA	P0C6X7	P59641,Q6WGN0,Q7T697,Q808C0,Q80BV7,Q80BV8,Q80E51
50155218	Oc1ccc(cc1O)-c1oc2cc(OCc3cccc(c3)C#N)cc(O)c2c(=O)c1O	InChI=1S/C23H15NO7/c24-10-12-2-1-3-13(6-12)11-30-15-8-18(27)20-19(9-15)31-23(22(29)21(20)28)14-4-5-16(25)17(26)7-14/h1-9,25-27,29H,11H2	JBMZSOUKPAAEJU-UHFFFAOYSA-N	50297254	3-[2-(3,4-Dihydroxy-phenyl)-3,5-dihydroxy-4-oxo-4H-chromen-7-yloxymethyl]-benzonitrile::CHEMBL551131	3C-like proteinase (3CL-PRO)	Human SARS coronavirus		2700							ChEMBL	10.1016/j.bmcl.2009.07.009	19625187			Lee, C; Lee, JM; Lee, NR; Kim, DE; Jeong, YJ; Chong, Y	Konkuk University	http://www.bindingdb.org/bind/chemsearch/marvin/MolStructure.jsp?monomerid=50297254	http://www.bindingdb.org/jsp/dbsearch/PrimarySearch_ki.jsp?energyterm=kJ/mole&tag=pol&polymerid=4753&target=3C-like+proteinase+%283CL-PRO%29&column=ki&startPg=0&Increment=50&submit=Search	http://www.bindingdb.org/jsp/dbsearch/PrimarySearch_ki.jsp?energyterm=kJ/mole&tag=r21&monomerid=50297254&enzyme=3C-like+proteinase+%283CL-PRO%29&column=ki&startPg=0&Increment=50&submit=Search			44517748	104138785		CHEMBL551131				ZINC43011508	1	MESLVLGVNEKTHVQLSLPVLQVRDVLVRGFGDSVEEALSEAREHLKNGTCGLVELEKGVLPQLEQPYVFIKRSDALSTNHGHKVVELVAEMDGIQYGRSGITLGVLVPHVGETPIAYRNVLLRKNGNKGAGGHSYGIDLKSYDLGDELGTDPIEDYEQNWNTKHGSGALRELTRELNGGAVTRYVDNNFCGPDGYPLDCIKDFLARAGKSMCTLSEQLDYIESKRGVYCCRDHEHEIAWFTERSDKSYEHQTPFEIKSAKKFDTFKGECPKFVFPLNSKVKVIQPRVEKKKTEGFMGRIRSVYPVASPQECNNMHLSTLMKCNHCDEVSWQTCDFLKATCEHCGTENLVIEGPTTCGYLPTNAVVKMPCPACQDPEIGPEHSVADYHNHSNIETRLRK…	1Q2W,1QZ8,1UJ1,1UK2,1UK3,1UK4,1UW7,1WOF,1Z1I,2A5A,2A5I,2A5K,2ACF,2AHM,2ALV,2AMD,2AMQ,2BX3,2BX4,2C3S,2D2D,2DUC,2FAV,2FE8,2FYG,2G9T,2GA6,2GDT,2GRI,2GT7,2GT8,2GTB,2GX4,2GZ7,2GZ8,2GZ9,2H2Z,2HOB,2HSX,2IDY,2JZF,2K7X,2K87,2KAF,2LIZ,2OP9,2OZK,2RNK,2V6N,2VJ1,2XYQ,2XYR,2XYV,2Z3C,2Z3D,2Z3E,2Z94,2Z9G,2Z9J,2Z9K,2Z9L,2ZU4,2ZU5,3D62,3E91,3E9S,3EA7,3EA8,3EBN,3IWM,3M3V,3MJ5,3R24,3SN8,3SNA,3SNB,3SNC,3SND,3SNE,3SZN…	Replicase polyprotein 1ab	R1AB_CVHSA	P0C6X7	P59641,Q6WGN0,Q7T697,Q808C0,Q80BV7,Q80BV8,Q80E51
50155219	Oc1cc(CNCc2cccc(Cl)c2)oc2ccc(O)c(=O)c12	InChI=1S/C17H14ClNO4/c18-11-3-1-2-10(6-11)8-19-9-12-7-14(21)16-15(23-12)5-4-13(20)17(16)22/h1-7,19-21H,8-9H2	USNNPKLCJHDFEE-UHFFFAOYSA-N	50297249	2-[(3-Chloro-benzylamino)-methyl]-5,6-dihydroxy-chromen-4-one::CHEMBL560136	3C-like proteinase (3CL-PRO)	Human SARS coronavirus		>50000							ChEMBL	10.1016/j.bmcl.2009.07.009	19625187			Lee, C; Lee, JM; Lee, NR; Kim, DE; Jeong, YJ; Chong, Y	Konkuk University	http://www.bindingdb.org/bind/chemsearch/marvin/MolStructure.jsp?monomerid=50297249	http://www.bindingdb.org/jsp/dbsearch/PrimarySearch_ki.jsp?energyterm=kJ/mole&tag=pol&polymerid=4753&target=3C-like+proteinase+%283CL-PRO%29&column=ki&startPg=0&Increment=50&submit=Search	http://www.bindingdb.org/jsp/dbsearch/PrimarySearch_ki.jsp?energyterm=kJ/mole&tag=r21&monomerid=50297249&enzyme=3C-like+proteinase+%283CL-PRO%29&column=ki&startPg=0&Increment=50&submit=Search			45268445	104138780		CHEMBL560136				ZINC43074183	1	MESLVLGVNEKTHVQLSLPVLQVRDVLVRGFGDSVEEALSEAREHLKNGTCGLVELEKGVLPQLEQPYVFIKRSDALSTNHGHKVVELVAEMDGIQYGRSGITLGVLVPHVGETPIAYRNVLLRKNGNKGAGGHSYGIDLKSYDLGDELGTDPIEDYEQNWNTKHGSGALRELTRELNGGAVTRYVDNNFCGPDGYPLDCIKDFLARAGKSMCTLSEQLDYIESKRGVYCCRDHEHEIAWFTERSDKSYEHQTPFEIKSAKKFDTFKGECPKFVFPLNSKVKVIQPRVEKKKTEGFMGRIRSVYPVASPQECNNMHLSTLMKCNHCDEVSWQTCDFLKATCEHCGTENLVIEGPTTCGYLPTNAVVKMPCPACQDPEIGPEHSVADYHNHSNIETRLRK…	1Q2W,1QZ8,1UJ1,1UK2,1UK3,1UK4,1UW7,1WOF,1Z1I,2A5A,2A5I,2A5K,2ACF,2AHM,2ALV,2AMD,2AMQ,2BX3,2BX4,2C3S,2D2D,2DUC,2FAV,2FE8,2FYG,2G9T,2GA6,2GDT,2GRI,2GT7,2GT8,2GTB,2GX4,2GZ7,2GZ8,2GZ9,2H2Z,2HOB,2HSX,2IDY,2JZF,2K7X,2K87,2KAF,2LIZ,2OP9,2OZK,2RNK,2V6N,2VJ1,2XYQ,2XYR,2XYV,2Z3C,2Z3D,2Z3E,2Z94,2Z9G,2Z9J,2Z9K,2Z9L,2ZU4,2ZU5,3D62,3E91,3E9S,3EA7,3EA8,3EBN,3IWM,3M3V,3MJ5,3R24,3SN8,3SNA,3SNB,3SNC,3SND,3SNE,3SZN…	Replicase polyprotein 1ab	R1AB_CVHSA	P0C6X7	P59641,Q6WGN0,Q7T697,Q808C0,Q80BV7,Q80BV8,Q80E51
50155220	Oc1cc(CNCc2cccc(Cl)c2)oc2ccc(O)c(=O)c12	InChI=1S/C17H14ClNO4/c18-11-3-1-2-10(6-11)8-19-9-12-7-14(21)16-15(23-12)5-4-13(20)17(16)22/h1-7,19-21H,8-9H2	USNNPKLCJHDFEE-UHFFFAOYSA-N	50297249	2-[(3-Chloro-benzylamino)-methyl]-5,6-dihydroxy-chromen-4-one::CHEMBL560136	3C-like proteinase (3CL-PRO)	Human SARS coronavirus		>50000							ChEMBL	10.1016/j.bmcl.2009.07.009	19625187			Lee, C; Lee, JM; Lee, NR; Kim, DE; Jeong, YJ; Chong, Y	Konkuk University	http://www.bindingdb.org/bind/chemsearch/marvin/MolStructure.jsp?monomerid=50297249	http://www.bindingdb.org/jsp/dbsearch/PrimarySearch_ki.jsp?energyterm=kJ/mole&tag=pol&polymerid=4753&target=3C-like+proteinase+%283CL-PRO%29&column=ki&startPg=0&Increment=50&submit=Search	http://www.bindingdb.org/jsp/dbsearch/PrimarySearch_ki.jsp?energyterm=kJ/mole&tag=r21&monomerid=50297249&enzyme=3C-like+proteinase+%283CL-PRO%29&column=ki&startPg=0&Increment=50&submit=Search			45268445	104138780		CHEMBL560136				ZINC43074183	1	MESLVLGVNEKTHVQLSLPVLQVRDVLVRGFGDSVEEALSEAREHLKNGTCGLVELEKGVLPQLEQPYVFIKRSDALSTNHGHKVVELVAEMDGIQYGRSGITLGVLVPHVGETPIAYRNVLLRKNGNKGAGGHSYGIDLKSYDLGDELGTDPIEDYEQNWNTKHGSGALRELTRELNGGAVTRYVDNNFCGPDGYPLDCIKDFLARAGKSMCTLSEQLDYIESKRGVYCCRDHEHEIAWFTERSDKSYEHQTPFEIKSAKKFDTFKGECPKFVFPLNSKVKVIQPRVEKKKTEGFMGRIRSVYPVASPQECNNMHLSTLMKCNHCDEVSWQTCDFLKATCEHCGTENLVIEGPTTCGYLPTNAVVKMPCPACQDPEIGPEHSVADYHNHSNIETRLRK…	1Q2W,1QZ8,1UJ1,1UK2,1UK3,1UK4,1UW7,1WOF,1Z1I,2A5A,2A5I,2A5K,2ACF,2AHM,2ALV,2AMD,2AMQ,2BX3,2BX4,2C3S,2D2D,2DUC,2FAV,2FE8,2FYG,2G9T,2GA6,2GDT,2GRI,2GT7,2GT8,2GTB,2GX4,2GZ7,2GZ8,2GZ9,2H2Z,2HOB,2HSX,2IDY,2JZF,2K7X,2K87,2KAF,2LIZ,2OP9,2OZK,2RNK,2V6N,2VJ1,2XYQ,2XYR,2XYV,2Z3C,2Z3D,2Z3E,2Z94,2Z9G,2Z9J,2Z9K,2Z9L,2ZU4,2ZU5,3D62,3E91,3E9S,3EA7,3EA8,3EBN,3IWM,3M3V,3MJ5,3R24,3SN8,3SNA,3SNB,3SNC,3SND,3SNE,3SZN…	Replicase polyprotein 1ab	R1AB_CVHSA	P0C6X7	P59641,Q6WGN0,Q7T697,Q808C0,Q80BV7,Q80BV8,Q80E51
50155221	Oc1cc(OCc2cccc(c2)C#N)cc2oc(c(O)c(=O)c12)-c1ccc2OCOc2c1	InChI=1S/C24H15NO7/c25-10-13-2-1-3-14(6-13)11-29-16-8-17(26)21-20(9-16)32-24(23(28)22(21)27)15-4-5-18-19(7-15)31-12-30-18/h1-9,26,28H,11-12H2	HUDLJTDCXGYOKM-UHFFFAOYSA-N	50297257	3-(2-Benzo[1,3]dioxol-5-yl-3,5-dihydroxy-4-oxo-4H-chromen-7-yloxymethyl)-benzonitrile::CHEMBL551529	3C-like proteinase (3CL-PRO)	Human SARS coronavirus		42900							ChEMBL	10.1016/j.bmcl.2009.07.009	19625187			Lee, C; Lee, JM; Lee, NR; Kim, DE; Jeong, YJ; Chong, Y	Konkuk University	http://www.bindingdb.org/bind/chemsearch/marvin/MolStructure.jsp?monomerid=50297257	http://www.bindingdb.org/jsp/dbsearch/PrimarySearch_ki.jsp?energyterm=kJ/mole&tag=pol&polymerid=4753&target=3C-like+proteinase+%283CL-PRO%29&column=ki&startPg=0&Increment=50&submit=Search	http://www.bindingdb.org/jsp/dbsearch/PrimarySearch_ki.jsp?energyterm=kJ/mole&tag=r21&monomerid=50297257&enzyme=3C-like+proteinase+%283CL-PRO%29&column=ki&startPg=0&Increment=50&submit=Search			45271832	104138788		CHEMBL551529				ZINC43061244	1	MESLVLGVNEKTHVQLSLPVLQVRDVLVRGFGDSVEEALSEAREHLKNGTCGLVELEKGVLPQLEQPYVFIKRSDALSTNHGHKVVELVAEMDGIQYGRSGITLGVLVPHVGETPIAYRNVLLRKNGNKGAGGHSYGIDLKSYDLGDELGTDPIEDYEQNWNTKHGSGALRELTRELNGGAVTRYVDNNFCGPDGYPLDCIKDFLARAGKSMCTLSEQLDYIESKRGVYCCRDHEHEIAWFTERSDKSYEHQTPFEIKSAKKFDTFKGECPKFVFPLNSKVKVIQPRVEKKKTEGFMGRIRSVYPVASPQECNNMHLSTLMKCNHCDEVSWQTCDFLKATCEHCGTENLVIEGPTTCGYLPTNAVVKMPCPACQDPEIGPEHSVADYHNHSNIETRLRK…	1Q2W,1QZ8,1UJ1,1UK2,1UK3,1UK4,1UW7,1WOF,1Z1I,2A5A,2A5I,2A5K,2ACF,2AHM,2ALV,2AMD,2AMQ,2BX3,2BX4,2C3S,2D2D,2DUC,2FAV,2FE8,2FYG,2G9T,2GA6,2GDT,2GRI,2GT7,2GT8,2GTB,2GX4,2GZ7,2GZ8,2GZ9,2H2Z,2HOB,2HSX,2IDY,2JZF,2K7X,2K87,2KAF,2LIZ,2OP9,2OZK,2RNK,2V6N,2VJ1,2XYQ,2XYR,2XYV,2Z3C,2Z3D,2Z3E,2Z94,2Z9G,2Z9J,2Z9K,2Z9L,2ZU4,2ZU5,3D62,3E91,3E9S,3EA7,3EA8,3EBN,3IWM,3M3V,3MJ5,3R24,3SN8,3SNA,3SNB,3SNC,3SND,3SNE,3SZN…	Replicase polyprotein 1ab	R1AB_CVHSA	P0C6X7	P59641,Q6WGN0,Q7T697,Q808C0,Q80BV7,Q80BV8,Q80E51
50155222	Oc1ccc(cc1O)-c1oc2cc(OCc3cccc(Cl)c3)cc(O)c2c(=O)c1O	InChI=1S/C22H15ClO7/c23-13-3-1-2-11(6-13)10-29-14-8-17(26)19-18(9-14)30-22(21(28)20(19)27)12-4-5-15(24)16(25)7-12/h1-9,24-26,28H,10H2	BIVPHUOIFUDUSK-UHFFFAOYSA-N	50297253	7-(3-Chloro-benzyloxy)-2-(3,4-dihydroxy-phenyl)-3,5-dihydroxy-chromen-4-one::CHEMBL551130	3C-like proteinase (3CL-PRO)	Human SARS coronavirus		5200							ChEMBL	10.1016/j.bmcl.2009.07.009	19625187			Lee, C; Lee, JM; Lee, NR; Kim, DE; Jeong, YJ; Chong, Y	Konkuk University	http://www.bindingdb.org/bind/chemsearch/marvin/MolStructure.jsp?monomerid=50297253	http://www.bindingdb.org/jsp/dbsearch/PrimarySearch_ki.jsp?energyterm=kJ/mole&tag=pol&polymerid=4753&target=3C-like+proteinase+%283CL-PRO%29&column=ki&startPg=0&Increment=50&submit=Search	http://www.bindingdb.org/jsp/dbsearch/PrimarySearch_ki.jsp?energyterm=kJ/mole&tag=r21&monomerid=50297253&enzyme=3C-like+proteinase+%283CL-PRO%29&column=ki&startPg=0&Increment=50&submit=Search			45271826	104138784		CHEMBL551130				ZINC43065223	1	MESLVLGVNEKTHVQLSLPVLQVRDVLVRGFGDSVEEALSEAREHLKNGTCGLVELEKGVLPQLEQPYVFIKRSDALSTNHGHKVVELVAEMDGIQYGRSGITLGVLVPHVGETPIAYRNVLLRKNGNKGAGGHSYGIDLKSYDLGDELGTDPIEDYEQNWNTKHGSGALRELTRELNGGAVTRYVDNNFCGPDGYPLDCIKDFLARAGKSMCTLSEQLDYIESKRGVYCCRDHEHEIAWFTERSDKSYEHQTPFEIKSAKKFDTFKGECPKFVFPLNSKVKVIQPRVEKKKTEGFMGRIRSVYPVASPQECNNMHLSTLMKCNHCDEVSWQTCDFLKATCEHCGTENLVIEGPTTCGYLPTNAVVKMPCPACQDPEIGPEHSVADYHNHSNIETRLRK…	1Q2W,1QZ8,1UJ1,1UK2,1UK3,1UK4,1UW7,1WOF,1Z1I,2A5A,2A5I,2A5K,2ACF,2AHM,2ALV,2AMD,2AMQ,2BX3,2BX4,2C3S,2D2D,2DUC,2FAV,2FE8,2FYG,2G9T,2GA6,2GDT,2GRI,2GT7,2GT8,2GTB,2GX4,2GZ7,2GZ8,2GZ9,2H2Z,2HOB,2HSX,2IDY,2JZF,2K7X,2K87,2KAF,2LIZ,2OP9,2OZK,2RNK,2V6N,2VJ1,2XYQ,2XYR,2XYV,2Z3C,2Z3D,2Z3E,2Z94,2Z9G,2Z9J,2Z9K,2Z9L,2ZU4,2ZU5,3D62,3E91,3E9S,3EA7,3EA8,3EBN,3IWM,3M3V,3MJ5,3R24,3SN8,3SNA,3SNB,3SNC,3SND,3SNE,3SZN…	Replicase polyprotein 1ab	R1AB_CVHSA	P0C6X7	P59641,Q6WGN0,Q7T697,Q808C0,Q80BV7,Q80BV8,Q80E51
50155223	Oc1cc(OCc2ccc(Cl)cc2)cc2oc(c(O)c(=O)c12)-c1ccc2OCOc2c1	InChI=1S/C23H15ClO7/c24-14-4-1-12(2-5-14)10-28-15-8-16(25)20-19(9-15)31-23(22(27)21(20)26)13-3-6-17-18(7-13)30-11-29-17/h1-9,25,27H,10-11H2	ZUVXTKFHFLXGGB-UHFFFAOYSA-N	50297255	2-Benzo[1,3]dioxol-5-yl-7-(4-chloro-benzyloxy)-3,5-dihydroxy-chromen-4-one::CHEMBL551334	3C-like proteinase (3CL-PRO)	Human SARS coronavirus		>50000							ChEMBL	10.1016/j.bmcl.2009.07.009	19625187			Lee, C; Lee, JM; Lee, NR; Kim, DE; Jeong, YJ; Chong, Y	Konkuk University	http://www.bindingdb.org/bind/chemsearch/marvin/MolStructure.jsp?monomerid=50297255	http://www.bindingdb.org/jsp/dbsearch/PrimarySearch_ki.jsp?energyterm=kJ/mole&tag=pol&polymerid=4753&target=3C-like+proteinase+%283CL-PRO%29&column=ki&startPg=0&Increment=50&submit=Search	http://www.bindingdb.org/jsp/dbsearch/PrimarySearch_ki.jsp?energyterm=kJ/mole&tag=r21&monomerid=50297255&enzyme=3C-like+proteinase+%283CL-PRO%29&column=ki&startPg=0&Increment=50&submit=Search			45271831	104138786		CHEMBL551334				ZINC43062049	1	MESLVLGVNEKTHVQLSLPVLQVRDVLVRGFGDSVEEALSEAREHLKNGTCGLVELEKGVLPQLEQPYVFIKRSDALSTNHGHKVVELVAEMDGIQYGRSGITLGVLVPHVGETPIAYRNVLLRKNGNKGAGGHSYGIDLKSYDLGDELGTDPIEDYEQNWNTKHGSGALRELTRELNGGAVTRYVDNNFCGPDGYPLDCIKDFLARAGKSMCTLSEQLDYIESKRGVYCCRDHEHEIAWFTERSDKSYEHQTPFEIKSAKKFDTFKGECPKFVFPLNSKVKVIQPRVEKKKTEGFMGRIRSVYPVASPQECNNMHLSTLMKCNHCDEVSWQTCDFLKATCEHCGTENLVIEGPTTCGYLPTNAVVKMPCPACQDPEIGPEHSVADYHNHSNIETRLRK…	1Q2W,1QZ8,1UJ1,1UK2,1UK3,1UK4,1UW7,1WOF,1Z1I,2A5A,2A5I,2A5K,2ACF,2AHM,2ALV,2AMD,2AMQ,2BX3,2BX4,2C3S,2D2D,2DUC,2FAV,2FE8,2FYG,2G9T,2GA6,2GDT,2GRI,2GT7,2GT8,2GTB,2GX4,2GZ7,2GZ8,2GZ9,2H2Z,2HOB,2HSX,2IDY,2JZF,2K7X,2K87,2KAF,2LIZ,2OP9,2OZK,2RNK,2V6N,2VJ1,2XYQ,2XYR,2XYV,2Z3C,2Z3D,2Z3E,2Z94,2Z9G,2Z9J,2Z9K,2Z9L,2ZU4,2ZU5,3D62,3E91,3E9S,3EA7,3EA8,3EBN,3IWM,3M3V,3MJ5,3R24,3SN8,3SNA,3SNB,3SNC,3SND,3SNE,3SZN…	Replicase polyprotein 1ab	R1AB_CVHSA	P0C6X7	P59641,Q6WGN0,Q7T697,Q808C0,Q80BV7,Q80BV8,Q80E51
50155224	Oc1cc(O)c2c(c1)oc(-c1ccc3OCOc3c1)c(O)c2=O	InChI=1S/C16H10O7/c17-8-4-9(18)13-12(5-8)23-16(15(20)14(13)19)7-1-2-10-11(3-7)22-6-21-10/h1-5,17-18,20H,6H2	KCXWXDGJLDWDTF-UHFFFAOYSA-N	50297251	2-Benzo[1,3]dioxol-5-yl-3,5,7-trihydroxy-chromen-4-one::CHEMBL556501	3C-like proteinase (3CL-PRO)	Human SARS coronavirus		>50000							ChEMBL	10.1016/j.bmcl.2009.07.009	19625187			Lee, C; Lee, JM; Lee, NR; Kim, DE; Jeong, YJ; Chong, Y	Konkuk University	http://www.bindingdb.org/bind/chemsearch/marvin/MolStructure.jsp?monomerid=50297251	http://www.bindingdb.org/jsp/dbsearch/PrimarySearch_ki.jsp?energyterm=kJ/mole&tag=pol&polymerid=4753&target=3C-like+proteinase+%283CL-PRO%29&column=ki&startPg=0&Increment=50&submit=Search	http://www.bindingdb.org/jsp/dbsearch/PrimarySearch_ki.jsp?energyterm=kJ/mole&tag=r21&monomerid=50297251&enzyme=3C-like+proteinase+%283CL-PRO%29&column=ki&startPg=0&Increment=50&submit=Search			45273625	104138782		CHEMBL556501				ZINC43063236	1	MESLVLGVNEKTHVQLSLPVLQVRDVLVRGFGDSVEEALSEAREHLKNGTCGLVELEKGVLPQLEQPYVFIKRSDALSTNHGHKVVELVAEMDGIQYGRSGITLGVLVPHVGETPIAYRNVLLRKNGNKGAGGHSYGIDLKSYDLGDELGTDPIEDYEQNWNTKHGSGALRELTRELNGGAVTRYVDNNFCGPDGYPLDCIKDFLARAGKSMCTLSEQLDYIESKRGVYCCRDHEHEIAWFTERSDKSYEHQTPFEIKSAKKFDTFKGECPKFVFPLNSKVKVIQPRVEKKKTEGFMGRIRSVYPVASPQECNNMHLSTLMKCNHCDEVSWQTCDFLKATCEHCGTENLVIEGPTTCGYLPTNAVVKMPCPACQDPEIGPEHSVADYHNHSNIETRLRK…	1Q2W,1QZ8,1UJ1,1UK2,1UK3,1UK4,1UW7,1WOF,1Z1I,2A5A,2A5I,2A5K,2ACF,2AHM,2ALV,2AMD,2AMQ,2BX3,2BX4,2C3S,2D2D,2DUC,2FAV,2FE8,2FYG,2G9T,2GA6,2GDT,2GRI,2GT7,2GT8,2GTB,2GX4,2GZ7,2GZ8,2GZ9,2H2Z,2HOB,2HSX,2IDY,2JZF,2K7X,2K87,2KAF,2LIZ,2OP9,2OZK,2RNK,2V6N,2VJ1,2XYQ,2XYR,2XYV,2Z3C,2Z3D,2Z3E,2Z94,2Z9G,2Z9J,2Z9K,2Z9L,2ZU4,2ZU5,3D62,3E91,3E9S,3EA7,3EA8,3EBN,3IWM,3M3V,3MJ5,3R24,3SN8,3SNA,3SNB,3SNC,3SND,3SNE,3SZN…	Replicase polyprotein 1ab	R1AB_CVHSA	P0C6X7	P59641,Q6WGN0,Q7T697,Q808C0,Q80BV7,Q80BV8,Q80E51
50155225	Oc1ccc(cc1O)-c1oc2cc(OCc3ccc(Cl)cc3)cc(O)c2c(=O)c1O	InChI=1S/C22H15ClO7/c23-13-4-1-11(2-5-13)10-29-14-8-17(26)19-18(9-14)30-22(21(28)20(19)27)12-3-6-15(24)16(25)7-12/h1-9,24-26,28H,10H2	BYQBMIHQROWCQG-UHFFFAOYSA-N	50297252	7-(4-Chloro-benzyloxy)-2-(3,4-dihydroxy-phenyl)-3,5-dihydroxy-chromen-4-one::CHEMBL550256	3C-like proteinase (3CL-PRO)	Human SARS coronavirus		4100							ChEMBL	10.1016/j.bmcl.2009.07.009	19625187			Lee, C; Lee, JM; Lee, NR; Kim, DE; Jeong, YJ; Chong, Y	Konkuk University	http://www.bindingdb.org/bind/chemsearch/marvin/MolStructure.jsp?monomerid=50297252	http://www.bindingdb.org/jsp/dbsearch/PrimarySearch_ki.jsp?energyterm=kJ/mole&tag=pol&polymerid=4753&target=3C-like+proteinase+%283CL-PRO%29&column=ki&startPg=0&Increment=50&submit=Search	http://www.bindingdb.org/jsp/dbsearch/PrimarySearch_ki.jsp?energyterm=kJ/mole&tag=r21&monomerid=50297252&enzyme=3C-like+proteinase+%283CL-PRO%29&column=ki&startPg=0&Increment=50&submit=Search			45270979	104138783		CHEMBL550256				ZINC43012025	1	MESLVLGVNEKTHVQLSLPVLQVRDVLVRGFGDSVEEALSEAREHLKNGTCGLVELEKGVLPQLEQPYVFIKRSDALSTNHGHKVVELVAEMDGIQYGRSGITLGVLVPHVGETPIAYRNVLLRKNGNKGAGGHSYGIDLKSYDLGDELGTDPIEDYEQNWNTKHGSGALRELTRELNGGAVTRYVDNNFCGPDGYPLDCIKDFLARAGKSMCTLSEQLDYIESKRGVYCCRDHEHEIAWFTERSDKSYEHQTPFEIKSAKKFDTFKGECPKFVFPLNSKVKVIQPRVEKKKTEGFMGRIRSVYPVASPQECNNMHLSTLMKCNHCDEVSWQTCDFLKATCEHCGTENLVIEGPTTCGYLPTNAVVKMPCPACQDPEIGPEHSVADYHNHSNIETRLRK…	1Q2W,1QZ8,1UJ1,1UK2,1UK3,1UK4,1UW7,1WOF,1Z1I,2A5A,2A5I,2A5K,2ACF,2AHM,2ALV,2AMD,2AMQ,2BX3,2BX4,2C3S,2D2D,2DUC,2FAV,2FE8,2FYG,2G9T,2GA6,2GDT,2GRI,2GT7,2GT8,2GTB,2GX4,2GZ7,2GZ8,2GZ9,2H2Z,2HOB,2HSX,2IDY,2JZF,2K7X,2K87,2KAF,2LIZ,2OP9,2OZK,2RNK,2V6N,2VJ1,2XYQ,2XYR,2XYV,2Z3C,2Z3D,2Z3E,2Z94,2Z9G,2Z9J,2Z9K,2Z9L,2ZU4,2ZU5,3D62,3E91,3E9S,3EA7,3EA8,3EBN,3IWM,3M3V,3MJ5,3R24,3SN8,3SNA,3SNB,3SNC,3SND,3SNE,3SZN…	Replicase polyprotein 1ab	R1AB_CVHSA	P0C6X7	P59641,Q6WGN0,Q7T697,Q808C0,Q80BV7,Q80BV8,Q80E51
50155226	Oc1cc(OCc2cccc(c2)C#N)cc2oc(c(O)c(=O)c12)-c1ccc2OCOc2c1	InChI=1S/C24H15NO7/c25-10-13-2-1-3-14(6-13)11-29-16-8-17(26)21-20(9-16)32-24(23(28)22(21)27)15-4-5-18-19(7-15)31-12-30-18/h1-9,26,28H,11-12H2	HUDLJTDCXGYOKM-UHFFFAOYSA-N	50297257	3-(2-Benzo[1,3]dioxol-5-yl-3,5-dihydroxy-4-oxo-4H-chromen-7-yloxymethyl)-benzonitrile::CHEMBL551529	3C-like proteinase (3CL-PRO)	Human SARS coronavirus		8100							ChEMBL	10.1016/j.bmcl.2009.07.009	19625187			Lee, C; Lee, JM; Lee, NR; Kim, DE; Jeong, YJ; Chong, Y	Konkuk University	http://www.bindingdb.org/bind/chemsearch/marvin/MolStructure.jsp?monomerid=50297257	http://www.bindingdb.org/jsp/dbsearch/PrimarySearch_ki.jsp?energyterm=kJ/mole&tag=pol&polymerid=4753&target=3C-like+proteinase+%283CL-PRO%29&column=ki&startPg=0&Increment=50&submit=Search	http://www.bindingdb.org/jsp/dbsearch/PrimarySearch_ki.jsp?energyterm=kJ/mole&tag=r21&monomerid=50297257&enzyme=3C-like+proteinase+%283CL-PRO%29&column=ki&startPg=0&Increment=50&submit=Search			45271832	104138788		CHEMBL551529				ZINC43061244	1	MESLVLGVNEKTHVQLSLPVLQVRDVLVRGFGDSVEEALSEAREHLKNGTCGLVELEKGVLPQLEQPYVFIKRSDALSTNHGHKVVELVAEMDGIQYGRSGITLGVLVPHVGETPIAYRNVLLRKNGNKGAGGHSYGIDLKSYDLGDELGTDPIEDYEQNWNTKHGSGALRELTRELNGGAVTRYVDNNFCGPDGYPLDCIKDFLARAGKSMCTLSEQLDYIESKRGVYCCRDHEHEIAWFTERSDKSYEHQTPFEIKSAKKFDTFKGECPKFVFPLNSKVKVIQPRVEKKKTEGFMGRIRSVYPVASPQECNNMHLSTLMKCNHCDEVSWQTCDFLKATCEHCGTENLVIEGPTTCGYLPTNAVVKMPCPACQDPEIGPEHSVADYHNHSNIETRLRK…	1Q2W,1QZ8,1UJ1,1UK2,1UK3,1UK4,1UW7,1WOF,1Z1I,2A5A,2A5I,2A5K,2ACF,2AHM,2ALV,2AMD,2AMQ,2BX3,2BX4,2C3S,2D2D,2DUC,2FAV,2FE8,2FYG,2G9T,2GA6,2GDT,2GRI,2GT7,2GT8,2GTB,2GX4,2GZ7,2GZ8,2GZ9,2H2Z,2HOB,2HSX,2IDY,2JZF,2K7X,2K87,2KAF,2LIZ,2OP9,2OZK,2RNK,2V6N,2VJ1,2XYQ,2XYR,2XYV,2Z3C,2Z3D,2Z3E,2Z94,2Z9G,2Z9J,2Z9K,2Z9L,2ZU4,2ZU5,3D62,3E91,3E9S,3EA7,3EA8,3EBN,3IWM,3M3V,3MJ5,3R24,3SN8,3SNA,3SNB,3SNC,3SND,3SNE,3SZN…	Replicase polyprotein 1ab	R1AB_CVHSA	P0C6X7	P59641,Q6WGN0,Q7T697,Q808C0,Q80BV7,Q80BV8,Q80E51
50155227	Oc1cc(CNCc2ccc(Cl)cc2)oc2ccc(O)c(=O)c12	InChI=1S/C17H14ClNO4/c18-11-3-1-10(2-4-11)8-19-9-12-7-14(21)16-15(23-12)6-5-13(20)17(16)22/h1-7,19-21H,8-9H2	VTUYHCLGDXJAAN-UHFFFAOYSA-N	50297248	2-[(4-Chloro-benzylamino)-methyl]-5,6-dihydroxy-chromen-4-one::CHEMBL549646	3C-like proteinase (3CL-PRO)	Human SARS coronavirus		>50000							ChEMBL	10.1016/j.bmcl.2009.07.009	19625187			Lee, C; Lee, JM; Lee, NR; Kim, DE; Jeong, YJ; Chong, Y	Konkuk University	http://www.bindingdb.org/bind/chemsearch/marvin/MolStructure.jsp?monomerid=50297248	http://www.bindingdb.org/jsp/dbsearch/PrimarySearch_ki.jsp?energyterm=kJ/mole&tag=pol&polymerid=4753&target=3C-like+proteinase+%283CL-PRO%29&column=ki&startPg=0&Increment=50&submit=Search	http://www.bindingdb.org/jsp/dbsearch/PrimarySearch_ki.jsp?energyterm=kJ/mole&tag=r21&monomerid=50297248&enzyme=3C-like+proteinase+%283CL-PRO%29&column=ki&startPg=0&Increment=50&submit=Search			45270971	104138779		CHEMBL549646				ZINC43018076	1	MESLVLGVNEKTHVQLSLPVLQVRDVLVRGFGDSVEEALSEAREHLKNGTCGLVELEKGVLPQLEQPYVFIKRSDALSTNHGHKVVELVAEMDGIQYGRSGITLGVLVPHVGETPIAYRNVLLRKNGNKGAGGHSYGIDLKSYDLGDELGTDPIEDYEQNWNTKHGSGALRELTRELNGGAVTRYVDNNFCGPDGYPLDCIKDFLARAGKSMCTLSEQLDYIESKRGVYCCRDHEHEIAWFTERSDKSYEHQTPFEIKSAKKFDTFKGECPKFVFPLNSKVKVIQPRVEKKKTEGFMGRIRSVYPVASPQECNNMHLSTLMKCNHCDEVSWQTCDFLKATCEHCGTENLVIEGPTTCGYLPTNAVVKMPCPACQDPEIGPEHSVADYHNHSNIETRLRK…	1Q2W,1QZ8,1UJ1,1UK2,1UK3,1UK4,1UW7,1WOF,1Z1I,2A5A,2A5I,2A5K,2ACF,2AHM,2ALV,2AMD,2AMQ,2BX3,2BX4,2C3S,2D2D,2DUC,2FAV,2FE8,2FYG,2G9T,2GA6,2GDT,2GRI,2GT7,2GT8,2GTB,2GX4,2GZ7,2GZ8,2GZ9,2H2Z,2HOB,2HSX,2IDY,2JZF,2K7X,2K87,2KAF,2LIZ,2OP9,2OZK,2RNK,2V6N,2VJ1,2XYQ,2XYR,2XYV,2Z3C,2Z3D,2Z3E,2Z94,2Z9G,2Z9J,2Z9K,2Z9L,2ZU4,2ZU5,3D62,3E91,3E9S,3EA7,3EA8,3EBN,3IWM,3M3V,3MJ5,3R24,3SN8,3SNA,3SNB,3SNC,3SND,3SNE,3SZN…	Replicase polyprotein 1ab	R1AB_CVHSA	P0C6X7	P59641,Q6WGN0,Q7T697,Q808C0,Q80BV7,Q80BV8,Q80E51
50155228	Oc1cc(CNCc2ccc(Cl)cc2)oc2ccc(O)c(=O)c12	InChI=1S/C17H14ClNO4/c18-11-3-1-10(2-4-11)8-19-9-12-7-14(21)16-15(23-12)6-5-13(20)17(16)22/h1-7,19-21H,8-9H2	VTUYHCLGDXJAAN-UHFFFAOYSA-N	50297248	2-[(4-Chloro-benzylamino)-methyl]-5,6-dihydroxy-chromen-4-one::CHEMBL549646	3C-like proteinase (3CL-PRO)	Human SARS coronavirus		>50000							ChEMBL	10.1016/j.bmcl.2009.07.009	19625187			Lee, C; Lee, JM; Lee, NR; Kim, DE; Jeong, YJ; Chong, Y	Konkuk University	http://www.bindingdb.org/bind/chemsearch/marvin/MolStructure.jsp?monomerid=50297248	http://www.bindingdb.org/jsp/dbsearch/PrimarySearch_ki.jsp?energyterm=kJ/mole&tag=pol&polymerid=4753&target=3C-like+proteinase+%283CL-PRO%29&column=ki&startPg=0&Increment=50&submit=Search	http://www.bindingdb.org/jsp/dbsearch/PrimarySearch_ki.jsp?energyterm=kJ/mole&tag=r21&monomerid=50297248&enzyme=3C-like+proteinase+%283CL-PRO%29&column=ki&startPg=0&Increment=50&submit=Search			45270971	104138779		CHEMBL549646				ZINC43018076	1	MESLVLGVNEKTHVQLSLPVLQVRDVLVRGFGDSVEEALSEAREHLKNGTCGLVELEKGVLPQLEQPYVFIKRSDALSTNHGHKVVELVAEMDGIQYGRSGITLGVLVPHVGETPIAYRNVLLRKNGNKGAGGHSYGIDLKSYDLGDELGTDPIEDYEQNWNTKHGSGALRELTRELNGGAVTRYVDNNFCGPDGYPLDCIKDFLARAGKSMCTLSEQLDYIESKRGVYCCRDHEHEIAWFTERSDKSYEHQTPFEIKSAKKFDTFKGECPKFVFPLNSKVKVIQPRVEKKKTEGFMGRIRSVYPVASPQECNNMHLSTLMKCNHCDEVSWQTCDFLKATCEHCGTENLVIEGPTTCGYLPTNAVVKMPCPACQDPEIGPEHSVADYHNHSNIETRLRK…	1Q2W,1QZ8,1UJ1,1UK2,1UK3,1UK4,1UW7,1WOF,1Z1I,2A5A,2A5I,2A5K,2ACF,2AHM,2ALV,2AMD,2AMQ,2BX3,2BX4,2C3S,2D2D,2DUC,2FAV,2FE8,2FYG,2G9T,2GA6,2GDT,2GRI,2GT7,2GT8,2GTB,2GX4,2GZ7,2GZ8,2GZ9,2H2Z,2HOB,2HSX,2IDY,2JZF,2K7X,2K87,2KAF,2LIZ,2OP9,2OZK,2RNK,2V6N,2VJ1,2XYQ,2XYR,2XYV,2Z3C,2Z3D,2Z3E,2Z94,2Z9G,2Z9J,2Z9K,2Z9L,2ZU4,2ZU5,3D62,3E91,3E9S,3EA7,3EA8,3EBN,3IWM,3M3V,3MJ5,3R24,3SN8,3SNA,3SNB,3SNC,3SND,3SNE,3SZN…	Replicase polyprotein 1ab	R1AB_CVHSA	P0C6X7	P59641,Q6WGN0,Q7T697,Q808C0,Q80BV7,Q80BV8,Q80E51
50155229	Oc1cc(O)c2c(c1)oc(-c1ccc3OCOc3c1)c(O)c2=O	InChI=1S/C16H10O7/c17-8-4-9(18)13-12(5-8)23-16(15(20)14(13)19)7-1-2-10-11(3-7)22-6-21-10/h1-5,17-18,20H,6H2	KCXWXDGJLDWDTF-UHFFFAOYSA-N	50297251	2-Benzo[1,3]dioxol-5-yl-3,5,7-trihydroxy-chromen-4-one::CHEMBL556501	3C-like proteinase (3CL-PRO)	Human SARS coronavirus		>50000							ChEMBL	10.1016/j.bmcl.2009.07.009	19625187			Lee, C; Lee, JM; Lee, NR; Kim, DE; Jeong, YJ; Chong, Y	Konkuk University	http://www.bindingdb.org/bind/chemsearch/marvin/MolStructure.jsp?monomerid=50297251	http://www.bindingdb.org/jsp/dbsearch/PrimarySearch_ki.jsp?energyterm=kJ/mole&tag=pol&polymerid=4753&target=3C-like+proteinase+%283CL-PRO%29&column=ki&startPg=0&Increment=50&submit=Search	http://www.bindingdb.org/jsp/dbsearch/PrimarySearch_ki.jsp?energyterm=kJ/mole&tag=r21&monomerid=50297251&enzyme=3C-like+proteinase+%283CL-PRO%29&column=ki&startPg=0&Increment=50&submit=Search			45273625	104138782		CHEMBL556501				ZINC43063236	1	MESLVLGVNEKTHVQLSLPVLQVRDVLVRGFGDSVEEALSEAREHLKNGTCGLVELEKGVLPQLEQPYVFIKRSDALSTNHGHKVVELVAEMDGIQYGRSGITLGVLVPHVGETPIAYRNVLLRKNGNKGAGGHSYGIDLKSYDLGDELGTDPIEDYEQNWNTKHGSGALRELTRELNGGAVTRYVDNNFCGPDGYPLDCIKDFLARAGKSMCTLSEQLDYIESKRGVYCCRDHEHEIAWFTERSDKSYEHQTPFEIKSAKKFDTFKGECPKFVFPLNSKVKVIQPRVEKKKTEGFMGRIRSVYPVASPQECNNMHLSTLMKCNHCDEVSWQTCDFLKATCEHCGTENLVIEGPTTCGYLPTNAVVKMPCPACQDPEIGPEHSVADYHNHSNIETRLRK…	1Q2W,1QZ8,1UJ1,1UK2,1UK3,1UK4,1UW7,1WOF,1Z1I,2A5A,2A5I,2A5K,2ACF,2AHM,2ALV,2AMD,2AMQ,2BX3,2BX4,2C3S,2D2D,2DUC,2FAV,2FE8,2FYG,2G9T,2GA6,2GDT,2GRI,2GT7,2GT8,2GTB,2GX4,2GZ7,2GZ8,2GZ9,2H2Z,2HOB,2HSX,2IDY,2JZF,2K7X,2K87,2KAF,2LIZ,2OP9,2OZK,2RNK,2V6N,2VJ1,2XYQ,2XYR,2XYV,2Z3C,2Z3D,2Z3E,2Z94,2Z9G,2Z9J,2Z9K,2Z9L,2ZU4,2ZU5,3D62,3E91,3E9S,3EA7,3EA8,3EBN,3IWM,3M3V,3MJ5,3R24,3SN8,3SNA,3SNB,3SNC,3SND,3SNE,3SZN…	Replicase polyprotein 1ab	R1AB_CVHSA	P0C6X7	P59641,Q6WGN0,Q7T697,Q808C0,Q80BV7,Q80BV8,Q80E51
50155230	Oc1cc(OCc2ccc(Cl)cc2)cc2oc(c(O)c(=O)c12)-c1ccc2OCOc2c1	InChI=1S/C23H15ClO7/c24-14-4-1-12(2-5-14)10-28-15-8-16(25)20-19(9-15)31-23(22(27)21(20)26)13-3-6-17-18(7-13)30-11-29-17/h1-9,25,27H,10-11H2	ZUVXTKFHFLXGGB-UHFFFAOYSA-N	50297255	2-Benzo[1,3]dioxol-5-yl-7-(4-chloro-benzyloxy)-3,5-dihydroxy-chromen-4-one::CHEMBL551334	3C-like proteinase (3CL-PRO)	Human SARS coronavirus		9300							ChEMBL	10.1016/j.bmcl.2009.07.009	19625187			Lee, C; Lee, JM; Lee, NR; Kim, DE; Jeong, YJ; Chong, Y	Konkuk University	http://www.bindingdb.org/bind/chemsearch/marvin/MolStructure.jsp?monomerid=50297255	http://www.bindingdb.org/jsp/dbsearch/PrimarySearch_ki.jsp?energyterm=kJ/mole&tag=pol&polymerid=4753&target=3C-like+proteinase+%283CL-PRO%29&column=ki&startPg=0&Increment=50&submit=Search	http://www.bindingdb.org/jsp/dbsearch/PrimarySearch_ki.jsp?energyterm=kJ/mole&tag=r21&monomerid=50297255&enzyme=3C-like+proteinase+%283CL-PRO%29&column=ki&startPg=0&Increment=50&submit=Search			45271831	104138786		CHEMBL551334				ZINC43062049	1	MESLVLGVNEKTHVQLSLPVLQVRDVLVRGFGDSVEEALSEAREHLKNGTCGLVELEKGVLPQLEQPYVFIKRSDALSTNHGHKVVELVAEMDGIQYGRSGITLGVLVPHVGETPIAYRNVLLRKNGNKGAGGHSYGIDLKSYDLGDELGTDPIEDYEQNWNTKHGSGALRELTRELNGGAVTRYVDNNFCGPDGYPLDCIKDFLARAGKSMCTLSEQLDYIESKRGVYCCRDHEHEIAWFTERSDKSYEHQTPFEIKSAKKFDTFKGECPKFVFPLNSKVKVIQPRVEKKKTEGFMGRIRSVYPVASPQECNNMHLSTLMKCNHCDEVSWQTCDFLKATCEHCGTENLVIEGPTTCGYLPTNAVVKMPCPACQDPEIGPEHSVADYHNHSNIETRLRK…	1Q2W,1QZ8,1UJ1,1UK2,1UK3,1UK4,1UW7,1WOF,1Z1I,2A5A,2A5I,2A5K,2ACF,2AHM,2ALV,2AMD,2AMQ,2BX3,2BX4,2C3S,2D2D,2DUC,2FAV,2FE8,2FYG,2G9T,2GA6,2GDT,2GRI,2GT7,2GT8,2GTB,2GX4,2GZ7,2GZ8,2GZ9,2H2Z,2HOB,2HSX,2IDY,2JZF,2K7X,2K87,2KAF,2LIZ,2OP9,2OZK,2RNK,2V6N,2VJ1,2XYQ,2XYR,2XYV,2Z3C,2Z3D,2Z3E,2Z94,2Z9G,2Z9J,2Z9K,2Z9L,2ZU4,2ZU5,3D62,3E91,3E9S,3EA7,3EA8,3EBN,3IWM,3M3V,3MJ5,3R24,3SN8,3SNA,3SNB,3SNC,3SND,3SNE,3SZN…	Replicase polyprotein 1ab	R1AB_CVHSA	P0C6X7	P59641,Q6WGN0,Q7T697,Q808C0,Q80BV7,Q80BV8,Q80E51
50155231	Oc1cc(O)c2c(c1)oc(-c1ccc(O)c(O)c1)c(O)c2=O	InChI=1S/C15H10O7/c16-7-4-10(19)12-11(5-7)22-15(14(21)13(12)20)6-1-2-8(17)9(18)3-6/h1-5,16-19,21H	REFJWTPEDVJJIY-UHFFFAOYSA-N	7460	2-(3,4-dihydroxyphenyl)-3,5,7-trihydroxy-4H-chromen-4-one::2-(3,4-dihydroxyphenyl)-3,5,7-trihydroxy-chromen-4-one::2-(3,4-dihydroxyphenyl)-3,5,7-trihydroxy-chromone;hydrate::CHEMBL50::Quercetin::Quercetin (10)::Quercetin (21)::Quercetin (Qur)::US9180183, Quercetin	3C-like proteinase (3CL-PRO)	Human SARS coronavirus		>50000							ChEMBL	10.1016/j.bmcl.2009.07.009	19625187			Lee, C; Lee, JM; Lee, NR; Kim, DE; Jeong, YJ; Chong, Y	Konkuk University	http://www.bindingdb.org/bind/chemsearch/marvin/MolStructure.jsp?monomerid=7460	http://www.bindingdb.org/jsp/dbsearch/PrimarySearch_ki.jsp?energyterm=kJ/mole&tag=pol&polymerid=4753&target=3C-like+proteinase+%283CL-PRO%29&column=ki&startPg=0&Increment=50&submit=Search	http://www.bindingdb.org/jsp/dbsearch/PrimarySearch_ki.jsp?energyterm=kJ/mole&tag=r21&monomerid=7460&enzyme=3C-like+proteinase+%283CL-PRO%29&column=ki&startPg=0&Increment=50&submit=Search	QUE	6IJD,3BPT,2HCK,6M89,4LMU,3LJ0,5FLI,5FLJ,2N6C,4DFU,3CF8,1E8W,4MRA,2C9Z,6QCD,2MS6,5XG4,2UXH,5AUW,3BXX,5A4V,1H1I,3LM5,1GP6,6AWS,4WNJ,2JJ2,6QCN,6B1D,2O3P,3NVY	5280343	11108251	16243	CHEMBL50	DB04216	5346	C00389	ZINC03869685	1	MESLVLGVNEKTHVQLSLPVLQVRDVLVRGFGDSVEEALSEAREHLKNGTCGLVELEKGVLPQLEQPYVFIKRSDALSTNHGHKVVELVAEMDGIQYGRSGITLGVLVPHVGETPIAYRNVLLRKNGNKGAGGHSYGIDLKSYDLGDELGTDPIEDYEQNWNTKHGSGALRELTRELNGGAVTRYVDNNFCGPDGYPLDCIKDFLARAGKSMCTLSEQLDYIESKRGVYCCRDHEHEIAWFTERSDKSYEHQTPFEIKSAKKFDTFKGECPKFVFPLNSKVKVIQPRVEKKKTEGFMGRIRSVYPVASPQECNNMHLSTLMKCNHCDEVSWQTCDFLKATCEHCGTENLVIEGPTTCGYLPTNAVVKMPCPACQDPEIGPEHSVADYHNHSNIETRLRK…	1Q2W,1QZ8,1UJ1,1UK2,1UK3,1UK4,1UW7,1WOF,1Z1I,2A5A,2A5I,2A5K,2ACF,2AHM,2ALV,2AMD,2AMQ,2BX3,2BX4,2C3S,2D2D,2DUC,2FAV,2FE8,2FYG,2G9T,2GA6,2GDT,2GRI,2GT7,2GT8,2GTB,2GX4,2GZ7,2GZ8,2GZ9,2H2Z,2HOB,2HSX,2IDY,2JZF,2K7X,2K87,2KAF,2LIZ,2OP9,2OZK,2RNK,2V6N,2VJ1,2XYQ,2XYR,2XYV,2Z3C,2Z3D,2Z3E,2Z94,2Z9G,2Z9J,2Z9K,2Z9L,2ZU4,2ZU5,3D62,3E91,3E9S,3EA7,3EA8,3EBN,3IWM,3M3V,3MJ5,3R24,3SN8,3SNA,3SNB,3SNC,3SND,3SNE,3SZN…	Replicase polyprotein 1ab	R1AB_CVHSA	P0C6X7	P59641,Q6WGN0,Q7T697,Q808C0,Q80BV7,Q80BV8,Q80E51
50155232	Oc1cc(CNCc2cccc(c2)C#N)oc2ccc(O)c(=O)c12	InChI=1S/C18H14N2O4/c19-8-11-2-1-3-12(6-11)9-20-10-13-7-15(22)17-16(24-13)5-4-14(21)18(17)23/h1-7,20-22H,9-10H2	SPQVVHKCYIGRHU-UHFFFAOYSA-N	50297250	3-{[(5,6-Dihydroxy-4-oxo-4H-chromen-2-ylmethyl)-amino]-methyl}-benzonitrile::CHEMBL560392	3C-like proteinase (3CL-PRO)	Human SARS coronavirus		>50000							ChEMBL	10.1016/j.bmcl.2009.07.009	19625187			Lee, C; Lee, JM; Lee, NR; Kim, DE; Jeong, YJ; Chong, Y	Konkuk University	http://www.bindingdb.org/bind/chemsearch/marvin/MolStructure.jsp?monomerid=50297250	http://www.bindingdb.org/jsp/dbsearch/PrimarySearch_ki.jsp?energyterm=kJ/mole&tag=pol&polymerid=4753&target=3C-like+proteinase+%283CL-PRO%29&column=ki&startPg=0&Increment=50&submit=Search	http://www.bindingdb.org/jsp/dbsearch/PrimarySearch_ki.jsp?energyterm=kJ/mole&tag=r21&monomerid=50297250&enzyme=3C-like+proteinase+%283CL-PRO%29&column=ki&startPg=0&Increment=50&submit=Search			45269292	104138781		CHEMBL560392				ZINC43072302	1	MESLVLGVNEKTHVQLSLPVLQVRDVLVRGFGDSVEEALSEAREHLKNGTCGLVELEKGVLPQLEQPYVFIKRSDALSTNHGHKVVELVAEMDGIQYGRSGITLGVLVPHVGETPIAYRNVLLRKNGNKGAGGHSYGIDLKSYDLGDELGTDPIEDYEQNWNTKHGSGALRELTRELNGGAVTRYVDNNFCGPDGYPLDCIKDFLARAGKSMCTLSEQLDYIESKRGVYCCRDHEHEIAWFTERSDKSYEHQTPFEIKSAKKFDTFKGECPKFVFPLNSKVKVIQPRVEKKKTEGFMGRIRSVYPVASPQECNNMHLSTLMKCNHCDEVSWQTCDFLKATCEHCGTENLVIEGPTTCGYLPTNAVVKMPCPACQDPEIGPEHSVADYHNHSNIETRLRK…	1Q2W,1QZ8,1UJ1,1UK2,1UK3,1UK4,1UW7,1WOF,1Z1I,2A5A,2A5I,2A5K,2ACF,2AHM,2ALV,2AMD,2AMQ,2BX3,2BX4,2C3S,2D2D,2DUC,2FAV,2FE8,2FYG,2G9T,2GA6,2GDT,2GRI,2GT7,2GT8,2GTB,2GX4,2GZ7,2GZ8,2GZ9,2H2Z,2HOB,2HSX,2IDY,2JZF,2K7X,2K87,2KAF,2LIZ,2OP9,2OZK,2RNK,2V6N,2VJ1,2XYQ,2XYR,2XYV,2Z3C,2Z3D,2Z3E,2Z94,2Z9G,2Z9J,2Z9K,2Z9L,2ZU4,2ZU5,3D62,3E91,3E9S,3EA7,3EA8,3EBN,3IWM,3M3V,3MJ5,3R24,3SN8,3SNA,3SNB,3SNC,3SND,3SNE,3SZN…	Replicase polyprotein 1ab	R1AB_CVHSA	P0C6X7	P59641,Q6WGN0,Q7T697,Q808C0,Q80BV7,Q80BV8,Q80E51
50155233	Oc1cc(CNCc2cccc(c2)C#N)oc2ccc(O)c(=O)c12	InChI=1S/C18H14N2O4/c19-8-11-2-1-3-12(6-11)9-20-10-13-7-15(22)17-16(24-13)5-4-14(21)18(17)23/h1-7,20-22H,9-10H2	SPQVVHKCYIGRHU-UHFFFAOYSA-N	50297250	3-{[(5,6-Dihydroxy-4-oxo-4H-chromen-2-ylmethyl)-amino]-methyl}-benzonitrile::CHEMBL560392	3C-like proteinase (3CL-PRO)	Human SARS coronavirus		>50000							ChEMBL	10.1016/j.bmcl.2009.07.009	19625187			Lee, C; Lee, JM; Lee, NR; Kim, DE; Jeong, YJ; Chong, Y	Konkuk University	http://www.bindingdb.org/bind/chemsearch/marvin/MolStructure.jsp?monomerid=50297250	http://www.bindingdb.org/jsp/dbsearch/PrimarySearch_ki.jsp?energyterm=kJ/mole&tag=pol&polymerid=4753&target=3C-like+proteinase+%283CL-PRO%29&column=ki&startPg=0&Increment=50&submit=Search	http://www.bindingdb.org/jsp/dbsearch/PrimarySearch_ki.jsp?energyterm=kJ/mole&tag=r21&monomerid=50297250&enzyme=3C-like+proteinase+%283CL-PRO%29&column=ki&startPg=0&Increment=50&submit=Search			45269292	104138781		CHEMBL560392				ZINC43072302	1	MESLVLGVNEKTHVQLSLPVLQVRDVLVRGFGDSVEEALSEAREHLKNGTCGLVELEKGVLPQLEQPYVFIKRSDALSTNHGHKVVELVAEMDGIQYGRSGITLGVLVPHVGETPIAYRNVLLRKNGNKGAGGHSYGIDLKSYDLGDELGTDPIEDYEQNWNTKHGSGALRELTRELNGGAVTRYVDNNFCGPDGYPLDCIKDFLARAGKSMCTLSEQLDYIESKRGVYCCRDHEHEIAWFTERSDKSYEHQTPFEIKSAKKFDTFKGECPKFVFPLNSKVKVIQPRVEKKKTEGFMGRIRSVYPVASPQECNNMHLSTLMKCNHCDEVSWQTCDFLKATCEHCGTENLVIEGPTTCGYLPTNAVVKMPCPACQDPEIGPEHSVADYHNHSNIETRLRK…	1Q2W,1QZ8,1UJ1,1UK2,1UK3,1UK4,1UW7,1WOF,1Z1I,2A5A,2A5I,2A5K,2ACF,2AHM,2ALV,2AMD,2AMQ,2BX3,2BX4,2C3S,2D2D,2DUC,2FAV,2FE8,2FYG,2G9T,2GA6,2GDT,2GRI,2GT7,2GT8,2GTB,2GX4,2GZ7,2GZ8,2GZ9,2H2Z,2HOB,2HSX,2IDY,2JZF,2K7X,2K87,2KAF,2LIZ,2OP9,2OZK,2RNK,2V6N,2VJ1,2XYQ,2XYR,2XYV,2Z3C,2Z3D,2Z3E,2Z94,2Z9G,2Z9J,2Z9K,2Z9L,2ZU4,2ZU5,3D62,3E91,3E9S,3EA7,3EA8,3EBN,3IWM,3M3V,3MJ5,3R24,3SN8,3SNA,3SNB,3SNC,3SND,3SNE,3SZN…	Replicase polyprotein 1ab	R1AB_CVHSA	P0C6X7	P59641,Q6WGN0,Q7T697,Q808C0,Q80BV7,Q80BV8,Q80E51
50155234	Oc1cc(O)c2c(c1)oc(-c1ccc(O)c(O)c1)c(O)c2=O	InChI=1S/C15H10O7/c16-7-4-10(19)12-11(5-7)22-15(14(21)13(12)20)6-1-2-8(17)9(18)3-6/h1-5,16-19,21H	REFJWTPEDVJJIY-UHFFFAOYSA-N	7460	2-(3,4-dihydroxyphenyl)-3,5,7-trihydroxy-4H-chromen-4-one::2-(3,4-dihydroxyphenyl)-3,5,7-trihydroxy-chromen-4-one::2-(3,4-dihydroxyphenyl)-3,5,7-trihydroxy-chromone;hydrate::CHEMBL50::Quercetin::Quercetin (10)::Quercetin (21)::Quercetin (Qur)::US9180183, Quercetin	3C-like proteinase (3CL-PRO)	Human SARS coronavirus		8100							ChEMBL	10.1016/j.bmcl.2009.07.009	19625187			Lee, C; Lee, JM; Lee, NR; Kim, DE; Jeong, YJ; Chong, Y	Konkuk University	http://www.bindingdb.org/bind/chemsearch/marvin/MolStructure.jsp?monomerid=7460	http://www.bindingdb.org/jsp/dbsearch/PrimarySearch_ki.jsp?energyterm=kJ/mole&tag=pol&polymerid=4753&target=3C-like+proteinase+%283CL-PRO%29&column=ki&startPg=0&Increment=50&submit=Search	http://www.bindingdb.org/jsp/dbsearch/PrimarySearch_ki.jsp?energyterm=kJ/mole&tag=r21&monomerid=7460&enzyme=3C-like+proteinase+%283CL-PRO%29&column=ki&startPg=0&Increment=50&submit=Search	QUE	6IJD,3BPT,2HCK,6M89,4LMU,3LJ0,5FLI,5FLJ,2N6C,4DFU,3CF8,1E8W,4MRA,2C9Z,6QCD,2MS6,5XG4,2UXH,5AUW,3BXX,5A4V,1H1I,3LM5,1GP6,6AWS,4WNJ,2JJ2,6QCN,6B1D,2O3P,3NVY	5280343	11108251	16243	CHEMBL50	DB04216	5346	C00389	ZINC03869685	1	MESLVLGVNEKTHVQLSLPVLQVRDVLVRGFGDSVEEALSEAREHLKNGTCGLVELEKGVLPQLEQPYVFIKRSDALSTNHGHKVVELVAEMDGIQYGRSGITLGVLVPHVGETPIAYRNVLLRKNGNKGAGGHSYGIDLKSYDLGDELGTDPIEDYEQNWNTKHGSGALRELTRELNGGAVTRYVDNNFCGPDGYPLDCIKDFLARAGKSMCTLSEQLDYIESKRGVYCCRDHEHEIAWFTERSDKSYEHQTPFEIKSAKKFDTFKGECPKFVFPLNSKVKVIQPRVEKKKTEGFMGRIRSVYPVASPQECNNMHLSTLMKCNHCDEVSWQTCDFLKATCEHCGTENLVIEGPTTCGYLPTNAVVKMPCPACQDPEIGPEHSVADYHNHSNIETRLRK…	1Q2W,1QZ8,1UJ1,1UK2,1UK3,1UK4,1UW7,1WOF,1Z1I,2A5A,2A5I,2A5K,2ACF,2AHM,2ALV,2AMD,2AMQ,2BX3,2BX4,2C3S,2D2D,2DUC,2FAV,2FE8,2FYG,2G9T,2GA6,2GDT,2GRI,2GT7,2GT8,2GTB,2GX4,2GZ7,2GZ8,2GZ9,2H2Z,2HOB,2HSX,2IDY,2JZF,2K7X,2K87,2KAF,2LIZ,2OP9,2OZK,2RNK,2V6N,2VJ1,2XYQ,2XYR,2XYV,2Z3C,2Z3D,2Z3E,2Z94,2Z9G,2Z9J,2Z9K,2Z9L,2ZU4,2ZU5,3D62,3E91,3E9S,3EA7,3EA8,3EBN,3IWM,3M3V,3MJ5,3R24,3SN8,3SNA,3SNB,3SNC,3SND,3SNE,3SZN…	Replicase polyprotein 1ab	R1AB_CVHSA	P0C6X7	P59641,Q6WGN0,Q7T697,Q808C0,Q80BV7,Q80BV8,Q80E51
50172844	CN(C)CCCNC(=O)C(\NC(=O)c1ccc(C)cc1)=C\c1ccc(o1)-c1ccccc1[N+]([O-])=O	InChI=1S/C26H28N4O5/c1-18-9-11-19(12-10-18)25(31)28-22(26(32)27-15-6-16-29(2)3)17-20-13-14-24(35-20)21-7-4-5-8-23(21)30(33)34/h4-5,7-14,17H,6,15-16H2,1-3H3,(H,27,32)(H,28,31)/b22-17-	AAVOXWIZJYSGEP-XLNRJJMWSA-N	53105	CHEMBL1315054::MLS001164598::N-[(Z)-1-[3-(dimethylamino)propylcarbamoyl]-2-[5-(2-nitrophenyl)-2-furyl]vinyl]-4-methyl-benzamide::N-[(Z)-3-[3-(dimethylamino)propylamino]-1-[5-(2-nitrophenyl)-2-furanyl]-3-oxoprop-1-en-2-yl]-4-methylbenzamide::N-[(Z)-3-[3-(dimethylamino)propylamino]-1-[5-(2-nitrophenyl)furan-2-yl]-3-oxidanylidene-prop-1-en-2-yl]-4-methyl-benzamide::N-[(Z)-3-[3-(dimethylamino)propyla…	3C-like proteinase (3CL-PRO)	Human SARS coronavirus		41390							ChEMBL	10.1016/j.bmcl.2011.03.034	21470860			Nguyen, TT; Ryu, HJ; Lee, SH; Hwang, S; Breton, V; Rhee, JH; Kim, D	Chonnam National University	http://www.bindingdb.org/bind/chemsearch/marvin/MolStructure.jsp?monomerid=53105	http://www.bindingdb.org/jsp/dbsearch/PrimarySearch_ki.jsp?energyterm=kJ/mole&tag=pol&polymerid=4753&target=3C-like+proteinase+%283CL-PRO%29&column=ki&startPg=0&Increment=50&submit=Search	http://www.bindingdb.org/jsp/dbsearch/PrimarySearch_ki.jsp?energyterm=kJ/mole&tag=r21&monomerid=53105&enzyme=3C-like+proteinase+%283CL-PRO%29&column=ki&startPg=0&Increment=50&submit=Search			2131982	252633238		CHEMBL1315054				ZINC03375982	1	MESLVLGVNEKTHVQLSLPVLQVRDVLVRGFGDSVEEALSEAREHLKNGTCGLVELEKGVLPQLEQPYVFIKRSDALSTNHGHKVVELVAEMDGIQYGRSGITLGVLVPHVGETPIAYRNVLLRKNGNKGAGGHSYGIDLKSYDLGDELGTDPIEDYEQNWNTKHGSGALRELTRELNGGAVTRYVDNNFCGPDGYPLDCIKDFLARAGKSMCTLSEQLDYIESKRGVYCCRDHEHEIAWFTERSDKSYEHQTPFEIKSAKKFDTFKGECPKFVFPLNSKVKVIQPRVEKKKTEGFMGRIRSVYPVASPQECNNMHLSTLMKCNHCDEVSWQTCDFLKATCEHCGTENLVIEGPTTCGYLPTNAVVKMPCPACQDPEIGPEHSVADYHNHSNIETRLRK…	1Q2W,1QZ8,1UJ1,1UK2,1UK3,1UK4,1UW7,1WOF,1Z1I,2A5A,2A5I,2A5K,2ACF,2AHM,2ALV,2AMD,2AMQ,2BX3,2BX4,2C3S,2D2D,2DUC,2FAV,2FE8,2FYG,2G9T,2GA6,2GDT,2GRI,2GT7,2GT8,2GTB,2GX4,2GZ7,2GZ8,2GZ9,2H2Z,2HOB,2HSX,2IDY,2JZF,2K7X,2K87,2KAF,2LIZ,2OP9,2OZK,2RNK,2V6N,2VJ1,2XYQ,2XYR,2XYV,2Z3C,2Z3D,2Z3E,2Z94,2Z9G,2Z9J,2Z9K,2Z9L,2ZU4,2ZU5,3D62,3E91,3E9S,3EA7,3EA8,3EBN,3IWM,3M3V,3MJ5,3R24,3SN8,3SNA,3SNB,3SNC,3SND,3SNE,3SZN…	Replicase polyprotein 1ab	R1AB_CVHSA	P0C6X7	P59641,Q6WGN0,Q7T697,Q808C0,Q80BV7,Q80BV8,Q80E51
50172845	O=C(CSc1ncnc2c1sc1nc(N3CCOCC3)c3CCCCc3c21)NCc1ccco1	InChI=1S/C24H25N5O3S2/c30-18(25-12-15-4-3-9-32-15)13-33-24-21-20(26-14-27-24)19-16-5-1-2-6-17(16)22(28-23(19)34-21)29-7-10-31-11-8-29/h3-4,9,14H,1-2,5-8,10-13H2,(H,25,30)	FRBXCVPWEKEFKO-UHFFFAOYSA-N	50343555	CHEMBL1774326::N-(2-furylmethyl)-2-{[5-(4-morpholinyl)-1,2,3,4-tetrahydropyrimido[4',5':4,5]thieno[2,3-c]isoquinolin-8-yl]thio}acetamide	3C-like proteinase (3CL-PRO)	Human SARS coronavirus		90720							ChEMBL	10.1016/j.bmcl.2011.03.034	21470860			Nguyen, TT; Ryu, HJ; Lee, SH; Hwang, S; Breton, V; Rhee, JH; Kim, D	Chonnam National University	http://www.bindingdb.org/bind/chemsearch/marvin/MolStructure.jsp?monomerid=50343555	http://www.bindingdb.org/jsp/dbsearch/PrimarySearch_ki.jsp?energyterm=kJ/mole&tag=pol&polymerid=4753&target=3C-like+proteinase+%283CL-PRO%29&column=ki&startPg=0&Increment=50&submit=Search	http://www.bindingdb.org/jsp/dbsearch/PrimarySearch_ki.jsp?energyterm=kJ/mole&tag=r21&monomerid=50343555&enzyme=3C-like+proteinase+%283CL-PRO%29&column=ki&startPg=0&Increment=50&submit=Search			1265413	131346491		CHEMBL1774326				ZINC20080272	1	MESLVLGVNEKTHVQLSLPVLQVRDVLVRGFGDSVEEALSEAREHLKNGTCGLVELEKGVLPQLEQPYVFIKRSDALSTNHGHKVVELVAEMDGIQYGRSGITLGVLVPHVGETPIAYRNVLLRKNGNKGAGGHSYGIDLKSYDLGDELGTDPIEDYEQNWNTKHGSGALRELTRELNGGAVTRYVDNNFCGPDGYPLDCIKDFLARAGKSMCTLSEQLDYIESKRGVYCCRDHEHEIAWFTERSDKSYEHQTPFEIKSAKKFDTFKGECPKFVFPLNSKVKVIQPRVEKKKTEGFMGRIRSVYPVASPQECNNMHLSTLMKCNHCDEVSWQTCDFLKATCEHCGTENLVIEGPTTCGYLPTNAVVKMPCPACQDPEIGPEHSVADYHNHSNIETRLRK…	1Q2W,1QZ8,1UJ1,1UK2,1UK3,1UK4,1UW7,1WOF,1Z1I,2A5A,2A5I,2A5K,2ACF,2AHM,2ALV,2AMD,2AMQ,2BX3,2BX4,2C3S,2D2D,2DUC,2FAV,2FE8,2FYG,2G9T,2GA6,2GDT,2GRI,2GT7,2GT8,2GTB,2GX4,2GZ7,2GZ8,2GZ9,2H2Z,2HOB,2HSX,2IDY,2JZF,2K7X,2K87,2KAF,2LIZ,2OP9,2OZK,2RNK,2V6N,2VJ1,2XYQ,2XYR,2XYV,2Z3C,2Z3D,2Z3E,2Z94,2Z9G,2Z9J,2Z9K,2Z9L,2ZU4,2ZU5,3D62,3E91,3E9S,3EA7,3EA8,3EBN,3IWM,3M3V,3MJ5,3R24,3SN8,3SNA,3SNB,3SNC,3SND,3SNE,3SZN…	Replicase polyprotein 1ab	R1AB_CVHSA	P0C6X7	P59641,Q6WGN0,Q7T697,Q808C0,Q80BV7,Q80BV8,Q80E51
50172846	Cc1nc(C)c(s1)C(=O)C1C(N(CCCN2CCOCC2)C(=O)C1=O)c1cccc(c1)[N+]([O-])=O	InChI=1/C23H26N4O6S/c1-14-22(34-15(2)24-14)20(28)18-19(16-5-3-6-17(13-16)27(31)32)26(23(30)21(18)29)8-4-7-25-9-11-33-12-10-25/h3,5-6,13,18-19H,4,7-12H2,1-2H3	ZXTNQCYQALWFFK-UHFFFAOYNA-N	50343553	4-[(2,4-dimethyl-1,3-thiazol-5-yl)carbonyl]-3-hydroxy-1-[3-(4-morpholinyl)propyl]-5-(3-nitrophenyl)-1,5-dihydro-2H-pyrrol-2-one::CHEMBL1774324	3C-like proteinase (3CL-PRO)	Human SARS coronavirus		101380							ChEMBL	10.1016/j.bmcl.2011.03.034	21470860			Nguyen, TT; Ryu, HJ; Lee, SH; Hwang, S; Breton, V; Rhee, JH; Kim, D	Chonnam National University	http://www.bindingdb.org/bind/chemsearch/marvin/MolStructure.jsp?monomerid=50343553	http://www.bindingdb.org/jsp/dbsearch/PrimarySearch_ki.jsp?energyterm=kJ/mole&tag=pol&polymerid=4753&target=3C-like+proteinase+%283CL-PRO%29&column=ki&startPg=0&Increment=50&submit=Search	http://www.bindingdb.org/jsp/dbsearch/PrimarySearch_ki.jsp?energyterm=kJ/mole&tag=r21&monomerid=50343553&enzyme=3C-like+proteinase+%283CL-PRO%29&column=ki&startPg=0&Increment=50&submit=Search			91932451	131346489		CHEMBL1774324				ZINC09353634	1	MESLVLGVNEKTHVQLSLPVLQVRDVLVRGFGDSVEEALSEAREHLKNGTCGLVELEKGVLPQLEQPYVFIKRSDALSTNHGHKVVELVAEMDGIQYGRSGITLGVLVPHVGETPIAYRNVLLRKNGNKGAGGHSYGIDLKSYDLGDELGTDPIEDYEQNWNTKHGSGALRELTRELNGGAVTRYVDNNFCGPDGYPLDCIKDFLARAGKSMCTLSEQLDYIESKRGVYCCRDHEHEIAWFTERSDKSYEHQTPFEIKSAKKFDTFKGECPKFVFPLNSKVKVIQPRVEKKKTEGFMGRIRSVYPVASPQECNNMHLSTLMKCNHCDEVSWQTCDFLKATCEHCGTENLVIEGPTTCGYLPTNAVVKMPCPACQDPEIGPEHSVADYHNHSNIETRLRK…	1Q2W,1QZ8,1UJ1,1UK2,1UK3,1UK4,1UW7,1WOF,1Z1I,2A5A,2A5I,2A5K,2ACF,2AHM,2ALV,2AMD,2AMQ,2BX3,2BX4,2C3S,2D2D,2DUC,2FAV,2FE8,2FYG,2G9T,2GA6,2GDT,2GRI,2GT7,2GT8,2GTB,2GX4,2GZ7,2GZ8,2GZ9,2H2Z,2HOB,2HSX,2IDY,2JZF,2K7X,2K87,2KAF,2LIZ,2OP9,2OZK,2RNK,2V6N,2VJ1,2XYQ,2XYR,2XYV,2Z3C,2Z3D,2Z3E,2Z94,2Z9G,2Z9J,2Z9K,2Z9L,2ZU4,2ZU5,3D62,3E91,3E9S,3EA7,3EA8,3EBN,3IWM,3M3V,3MJ5,3R24,3SN8,3SNA,3SNB,3SNC,3SND,3SNE,3SZN…	Replicase polyprotein 1ab	R1AB_CVHSA	P0C6X7	P59641,Q6WGN0,Q7T697,Q808C0,Q80BV7,Q80BV8,Q80E51
50172847	COc1cc(\C=N\NC(=O)C(\NC(=O)c2ccccc2)=C/c2ccccc2)cc(OC)c1O	InChI=1S/C25H23N3O5/c1-32-21-14-18(15-22(33-2)23(21)29)16-26-28-25(31)20(13-17-9-5-3-6-10-17)27-24(30)19-11-7-4-8-12-19/h3-16,29H,1-2H3,(H,27,30)(H,28,31)/b20-13+,26-16+	FNYFSVWJEDFLBU-LZJHMVIHSA-N	50343554	CHEMBL1774325::N-(1-{[2-(4-hydroxy-3,5-dimethoxybenzylidene)hydrazino]carbonyl}-2-phenylvinyl)benzamide	3C-like proteinase (3CL-PRO)	Human SARS coronavirus		77090							ChEMBL	10.1016/j.bmcl.2011.03.034	21470860			Nguyen, TT; Ryu, HJ; Lee, SH; Hwang, S; Breton, V; Rhee, JH; Kim, D	Chonnam National University	http://www.bindingdb.org/bind/chemsearch/marvin/MolStructure.jsp?monomerid=50343554	http://www.bindingdb.org/jsp/dbsearch/PrimarySearch_ki.jsp?energyterm=kJ/mole&tag=pol&polymerid=4753&target=3C-like+proteinase+%283CL-PRO%29&column=ki&startPg=0&Increment=50&submit=Search	http://www.bindingdb.org/jsp/dbsearch/PrimarySearch_ki.jsp?energyterm=kJ/mole&tag=r21&monomerid=50343554&enzyme=3C-like+proteinase+%283CL-PRO%29&column=ki&startPg=0&Increment=50&submit=Search			5341319	131346490		CHEMBL1774325				ZINC16671860	1	MESLVLGVNEKTHVQLSLPVLQVRDVLVRGFGDSVEEALSEAREHLKNGTCGLVELEKGVLPQLEQPYVFIKRSDALSTNHGHKVVELVAEMDGIQYGRSGITLGVLVPHVGETPIAYRNVLLRKNGNKGAGGHSYGIDLKSYDLGDELGTDPIEDYEQNWNTKHGSGALRELTRELNGGAVTRYVDNNFCGPDGYPLDCIKDFLARAGKSMCTLSEQLDYIESKRGVYCCRDHEHEIAWFTERSDKSYEHQTPFEIKSAKKFDTFKGECPKFVFPLNSKVKVIQPRVEKKKTEGFMGRIRSVYPVASPQECNNMHLSTLMKCNHCDEVSWQTCDFLKATCEHCGTENLVIEGPTTCGYLPTNAVVKMPCPACQDPEIGPEHSVADYHNHSNIETRLRK…	1Q2W,1QZ8,1UJ1,1UK2,1UK3,1UK4,1UW7,1WOF,1Z1I,2A5A,2A5I,2A5K,2ACF,2AHM,2ALV,2AMD,2AMQ,2BX3,2BX4,2C3S,2D2D,2DUC,2FAV,2FE8,2FYG,2G9T,2GA6,2GDT,2GRI,2GT7,2GT8,2GTB,2GX4,2GZ7,2GZ8,2GZ9,2H2Z,2HOB,2HSX,2IDY,2JZF,2K7X,2K87,2KAF,2LIZ,2OP9,2OZK,2RNK,2V6N,2VJ1,2XYQ,2XYR,2XYV,2Z3C,2Z3D,2Z3E,2Z94,2Z9G,2Z9J,2Z9K,2Z9L,2ZU4,2ZU5,3D62,3E91,3E9S,3EA7,3EA8,3EBN,3IWM,3M3V,3MJ5,3R24,3SN8,3SNA,3SNB,3SNC,3SND,3SNE,3SZN…	Replicase polyprotein 1ab	R1AB_CVHSA	P0C6X7	P59641,Q6WGN0,Q7T697,Q808C0,Q80BV7,Q80BV8,Q80E51
50172848	COc1cc(ccc1O)C1C(C(=O)c2ccc(OCC(C)C)cc2C)C(=O)C(=O)N1CCN(C)C	InChI=1/C27H34N2O6/c1-16(2)15-35-19-8-9-20(17(3)13-19)25(31)23-24(18-7-10-21(30)22(14-18)34-6)29(12-11-28(4)5)27(33)26(23)32/h7-10,13-14,16,23-24,30H,11-12,15H2,1-6H3	TYGIQOSQHHWZBJ-UHFFFAOYNA-N	50343552	1-[2-(dimethylamino)ethyl]-3-hydroxy-5-(4-hydroxy-3-methoxyphenyl)-4-(4-isobutoxy-2-methylbenzoyl)-1,5-dihydro-2H-pyrrol-2-one::CHEMBL1774323	3C-like proteinase (3CL-PRO)	Human SARS coronavirus		62790							ChEMBL	10.1016/j.bmcl.2011.03.034	21470860			Nguyen, TT; Ryu, HJ; Lee, SH; Hwang, S; Breton, V; Rhee, JH; Kim, D	Chonnam National University	http://www.bindingdb.org/bind/chemsearch/marvin/MolStructure.jsp?monomerid=50343552	http://www.bindingdb.org/jsp/dbsearch/PrimarySearch_ki.jsp?energyterm=kJ/mole&tag=pol&polymerid=4753&target=3C-like+proteinase+%283CL-PRO%29&column=ki&startPg=0&Increment=50&submit=Search	http://www.bindingdb.org/jsp/dbsearch/PrimarySearch_ki.jsp?energyterm=kJ/mole&tag=r21&monomerid=50343552&enzyme=3C-like+proteinase+%283CL-PRO%29&column=ki&startPg=0&Increment=50&submit=Search			4757977	131346488		CHEMBL1774323				ZINC09241171	1	MESLVLGVNEKTHVQLSLPVLQVRDVLVRGFGDSVEEALSEAREHLKNGTCGLVELEKGVLPQLEQPYVFIKRSDALSTNHGHKVVELVAEMDGIQYGRSGITLGVLVPHVGETPIAYRNVLLRKNGNKGAGGHSYGIDLKSYDLGDELGTDPIEDYEQNWNTKHGSGALRELTRELNGGAVTRYVDNNFCGPDGYPLDCIKDFLARAGKSMCTLSEQLDYIESKRGVYCCRDHEHEIAWFTERSDKSYEHQTPFEIKSAKKFDTFKGECPKFVFPLNSKVKVIQPRVEKKKTEGFMGRIRSVYPVASPQECNNMHLSTLMKCNHCDEVSWQTCDFLKATCEHCGTENLVIEGPTTCGYLPTNAVVKMPCPACQDPEIGPEHSVADYHNHSNIETRLRK…	1Q2W,1QZ8,1UJ1,1UK2,1UK3,1UK4,1UW7,1WOF,1Z1I,2A5A,2A5I,2A5K,2ACF,2AHM,2ALV,2AMD,2AMQ,2BX3,2BX4,2C3S,2D2D,2DUC,2FAV,2FE8,2FYG,2G9T,2GA6,2GDT,2GRI,2GT7,2GT8,2GTB,2GX4,2GZ7,2GZ8,2GZ9,2H2Z,2HOB,2HSX,2IDY,2JZF,2K7X,2K87,2KAF,2LIZ,2OP9,2OZK,2RNK,2V6N,2VJ1,2XYQ,2XYR,2XYV,2Z3C,2Z3D,2Z3E,2Z94,2Z9G,2Z9J,2Z9K,2Z9L,2ZU4,2ZU5,3D62,3E91,3E9S,3EA7,3EA8,3EBN,3IWM,3M3V,3MJ5,3R24,3SN8,3SNA,3SNB,3SNC,3SND,3SNE,3SZN…	Replicase polyprotein 1ab	R1AB_CVHSA	P0C6X7	P59641,Q6WGN0,Q7T697,Q808C0,Q80BV7,Q80BV8,Q80E51
50172849	CN(C)CCCNC(=O)C(\NC(=O)c1ccc(C)cc1)=C\c1ccc(o1)-c1cccc(c1)[N+]([O-])=O	InChI=1S/C26H28N4O5/c1-18-8-10-19(11-9-18)25(31)28-23(26(32)27-14-5-15-29(2)3)17-22-12-13-24(35-22)20-6-4-7-21(16-20)30(33)34/h4,6-13,16-17H,5,14-15H2,1-3H3,(H,27,32)(H,28,31)/b23-17-	QFOLMPFZCVBCTJ-QJOMJCCJSA-N	78957	MLS001163269::N-[(Z)-1-[3-(dimethylamino)propylcarbamoyl]-2-[5-(3-nitrophenyl)-2-furyl]vinyl]-4-methyl-benzamide::N-[(Z)-3-[3-(dimethylamino)propylamino]-1-[5-(3-nitrophenyl)-2-furanyl]-3-oxoprop-1-en-2-yl]-4-methylbenzamide::N-[(Z)-3-[3-(dimethylamino)propylamino]-1-[5-(3-nitrophenyl)furan-2-yl]-3-oxidanylidene-prop-1-en-2-yl]-4-methyl-benzamide::N-[(Z)-3-[3-(dimethylamino)propylamino]-1-[5-(3-n…	3C-like proteinase (3CL-PRO)	Human SARS coronavirus	9110								ChEMBL	10.1016/j.bmcl.2011.03.034	21470860			Nguyen, TT; Ryu, HJ; Lee, SH; Hwang, S; Breton, V; Rhee, JH; Kim, D	Chonnam National University	http://www.bindingdb.org/bind/chemsearch/marvin/MolStructure.jsp?monomerid=78957	http://www.bindingdb.org/jsp/dbsearch/PrimarySearch_ki.jsp?energyterm=kJ/mole&tag=pol&polymerid=4753&target=3C-like+proteinase+%283CL-PRO%29&column=ki&startPg=0&Increment=50&submit=Search	http://www.bindingdb.org/jsp/dbsearch/PrimarySearch_ki.jsp?energyterm=kJ/mole&tag=r21&monomerid=78957&enzyme=3C-like+proteinase+%283CL-PRO%29&column=ki&startPg=0&Increment=50&submit=Search			2131972	252655677						ZINC12732678	1	MESLVLGVNEKTHVQLSLPVLQVRDVLVRGFGDSVEEALSEAREHLKNGTCGLVELEKGVLPQLEQPYVFIKRSDALSTNHGHKVVELVAEMDGIQYGRSGITLGVLVPHVGETPIAYRNVLLRKNGNKGAGGHSYGIDLKSYDLGDELGTDPIEDYEQNWNTKHGSGALRELTRELNGGAVTRYVDNNFCGPDGYPLDCIKDFLARAGKSMCTLSEQLDYIESKRGVYCCRDHEHEIAWFTERSDKSYEHQTPFEIKSAKKFDTFKGECPKFVFPLNSKVKVIQPRVEKKKTEGFMGRIRSVYPVASPQECNNMHLSTLMKCNHCDEVSWQTCDFLKATCEHCGTENLVIEGPTTCGYLPTNAVVKMPCPACQDPEIGPEHSVADYHNHSNIETRLRK…	1Q2W,1QZ8,1UJ1,1UK2,1UK3,1UK4,1UW7,1WOF,1Z1I,2A5A,2A5I,2A5K,2ACF,2AHM,2ALV,2AMD,2AMQ,2BX3,2BX4,2C3S,2D2D,2DUC,2FAV,2FE8,2FYG,2G9T,2GA6,2GDT,2GRI,2GT7,2GT8,2GTB,2GX4,2GZ7,2GZ8,2GZ9,2H2Z,2HOB,2HSX,2IDY,2JZF,2K7X,2K87,2KAF,2LIZ,2OP9,2OZK,2RNK,2V6N,2VJ1,2XYQ,2XYR,2XYV,2Z3C,2Z3D,2Z3E,2Z94,2Z9G,2Z9J,2Z9K,2Z9L,2ZU4,2ZU5,3D62,3E91,3E9S,3EA7,3EA8,3EBN,3IWM,3M3V,3MJ5,3R24,3SN8,3SNA,3SNB,3SNC,3SND,3SNE,3SZN…	Replicase polyprotein 1ab	R1AB_CVHSA	P0C6X7	P59641,Q6WGN0,Q7T697,Q808C0,Q80BV7,Q80BV8,Q80E51
50172850	Nc1nc(CSc2nnc(-c3cccc4ccccc34)n2-c2ccccc2)cs1	InChI=1S/C22H17N5S2/c23-21-24-16(13-28-21)14-29-22-26-25-20(27(22)17-9-2-1-3-10-17)19-12-6-8-15-7-4-5-11-18(15)19/h1-13H,14H2,(H2,23,24)	FWUJPPXHEKWVQA-UHFFFAOYSA-N	50343551	4-({[5-(1-naphthyl)-4-phenyl-4H-1,2,4-triazol-3-yl]thio}methyl)-1,3-thiazol-2-amine::CHEMBL1774322	3C-like proteinase (3CL-PRO)	Human SARS coronavirus		58350							ChEMBL	10.1016/j.bmcl.2011.03.034	21470860			Nguyen, TT; Ryu, HJ; Lee, SH; Hwang, S; Breton, V; Rhee, JH; Kim, D	Chonnam National University	http://www.bindingdb.org/bind/chemsearch/marvin/MolStructure.jsp?monomerid=50343551	http://www.bindingdb.org/jsp/dbsearch/PrimarySearch_ki.jsp?energyterm=kJ/mole&tag=pol&polymerid=4753&target=3C-like+proteinase+%283CL-PRO%29&column=ki&startPg=0&Increment=50&submit=Search	http://www.bindingdb.org/jsp/dbsearch/PrimarySearch_ki.jsp?energyterm=kJ/mole&tag=r21&monomerid=50343551&enzyme=3C-like+proteinase+%283CL-PRO%29&column=ki&startPg=0&Increment=50&submit=Search			1328543	131346487		CHEMBL1774322				ZINC01159685	1	MESLVLGVNEKTHVQLSLPVLQVRDVLVRGFGDSVEEALSEAREHLKNGTCGLVELEKGVLPQLEQPYVFIKRSDALSTNHGHKVVELVAEMDGIQYGRSGITLGVLVPHVGETPIAYRNVLLRKNGNKGAGGHSYGIDLKSYDLGDELGTDPIEDYEQNWNTKHGSGALRELTRELNGGAVTRYVDNNFCGPDGYPLDCIKDFLARAGKSMCTLSEQLDYIESKRGVYCCRDHEHEIAWFTERSDKSYEHQTPFEIKSAKKFDTFKGECPKFVFPLNSKVKVIQPRVEKKKTEGFMGRIRSVYPVASPQECNNMHLSTLMKCNHCDEVSWQTCDFLKATCEHCGTENLVIEGPTTCGYLPTNAVVKMPCPACQDPEIGPEHSVADYHNHSNIETRLRK…	1Q2W,1QZ8,1UJ1,1UK2,1UK3,1UK4,1UW7,1WOF,1Z1I,2A5A,2A5I,2A5K,2ACF,2AHM,2ALV,2AMD,2AMQ,2BX3,2BX4,2C3S,2D2D,2DUC,2FAV,2FE8,2FYG,2G9T,2GA6,2GDT,2GRI,2GT7,2GT8,2GTB,2GX4,2GZ7,2GZ8,2GZ9,2H2Z,2HOB,2HSX,2IDY,2JZF,2K7X,2K87,2KAF,2LIZ,2OP9,2OZK,2RNK,2V6N,2VJ1,2XYQ,2XYR,2XYV,2Z3C,2Z3D,2Z3E,2Z94,2Z9G,2Z9J,2Z9K,2Z9L,2ZU4,2ZU5,3D62,3E91,3E9S,3EA7,3EA8,3EBN,3IWM,3M3V,3MJ5,3R24,3SN8,3SNA,3SNB,3SNC,3SND,3SNE,3SZN…	Replicase polyprotein 1ab	R1AB_CVHSA	P0C6X7	P59641,Q6WGN0,Q7T697,Q808C0,Q80BV7,Q80BV8,Q80E51
50172851	CN(C)CCCNC(=O)C(\NC(=O)c1ccc(C)cc1)=C\c1ccc(o1)-c1cccc(c1)[N+]([O-])=O	InChI=1S/C26H28N4O5/c1-18-8-10-19(11-9-18)25(31)28-23(26(32)27-14-5-15-29(2)3)17-22-12-13-24(35-22)20-6-4-7-21(16-20)30(33)34/h4,6-13,16-17H,5,14-15H2,1-3H3,(H,27,32)(H,28,31)/b23-17-	QFOLMPFZCVBCTJ-QJOMJCCJSA-N	78957	MLS001163269::N-[(Z)-1-[3-(dimethylamino)propylcarbamoyl]-2-[5-(3-nitrophenyl)-2-furyl]vinyl]-4-methyl-benzamide::N-[(Z)-3-[3-(dimethylamino)propylamino]-1-[5-(3-nitrophenyl)-2-furanyl]-3-oxoprop-1-en-2-yl]-4-methylbenzamide::N-[(Z)-3-[3-(dimethylamino)propylamino]-1-[5-(3-nitrophenyl)furan-2-yl]-3-oxidanylidene-prop-1-en-2-yl]-4-methyl-benzamide::N-[(Z)-3-[3-(dimethylamino)propylamino]-1-[5-(3-n…	3C-like proteinase (3CL-PRO)	Human SARS coronavirus		38570							ChEMBL	10.1016/j.bmcl.2011.03.034	21470860			Nguyen, TT; Ryu, HJ; Lee, SH; Hwang, S; Breton, V; Rhee, JH; Kim, D	Chonnam National University	http://www.bindingdb.org/bind/chemsearch/marvin/MolStructure.jsp?monomerid=78957	http://www.bindingdb.org/jsp/dbsearch/PrimarySearch_ki.jsp?energyterm=kJ/mole&tag=pol&polymerid=4753&target=3C-like+proteinase+%283CL-PRO%29&column=ki&startPg=0&Increment=50&submit=Search	http://www.bindingdb.org/jsp/dbsearch/PrimarySearch_ki.jsp?energyterm=kJ/mole&tag=r21&monomerid=78957&enzyme=3C-like+proteinase+%283CL-PRO%29&column=ki&startPg=0&Increment=50&submit=Search			2131972	252655677						ZINC12732678	1	MESLVLGVNEKTHVQLSLPVLQVRDVLVRGFGDSVEEALSEAREHLKNGTCGLVELEKGVLPQLEQPYVFIKRSDALSTNHGHKVVELVAEMDGIQYGRSGITLGVLVPHVGETPIAYRNVLLRKNGNKGAGGHSYGIDLKSYDLGDELGTDPIEDYEQNWNTKHGSGALRELTRELNGGAVTRYVDNNFCGPDGYPLDCIKDFLARAGKSMCTLSEQLDYIESKRGVYCCRDHEHEIAWFTERSDKSYEHQTPFEIKSAKKFDTFKGECPKFVFPLNSKVKVIQPRVEKKKTEGFMGRIRSVYPVASPQECNNMHLSTLMKCNHCDEVSWQTCDFLKATCEHCGTENLVIEGPTTCGYLPTNAVVKMPCPACQDPEIGPEHSVADYHNHSNIETRLRK…	1Q2W,1QZ8,1UJ1,1UK2,1UK3,1UK4,1UW7,1WOF,1Z1I,2A5A,2A5I,2A5K,2ACF,2AHM,2ALV,2AMD,2AMQ,2BX3,2BX4,2C3S,2D2D,2DUC,2FAV,2FE8,2FYG,2G9T,2GA6,2GDT,2GRI,2GT7,2GT8,2GTB,2GX4,2GZ7,2GZ8,2GZ9,2H2Z,2HOB,2HSX,2IDY,2JZF,2K7X,2K87,2KAF,2LIZ,2OP9,2OZK,2RNK,2V6N,2VJ1,2XYQ,2XYR,2XYV,2Z3C,2Z3D,2Z3E,2Z94,2Z9G,2Z9J,2Z9K,2Z9L,2ZU4,2ZU5,3D62,3E91,3E9S,3EA7,3EA8,3EBN,3IWM,3M3V,3MJ5,3R24,3SN8,3SNA,3SNB,3SNC,3SND,3SNE,3SZN…	Replicase polyprotein 1ab	R1AB_CVHSA	P0C6X7	P59641,Q6WGN0,Q7T697,Q808C0,Q80BV7,Q80BV8,Q80E51
50172852	CN(C)CCCNC(=O)C(\NC(=O)c1ccc(C)cc1)=C\c1ccc(o1)-c1ccccc1[N+]([O-])=O	InChI=1S/C26H28N4O5/c1-18-9-11-19(12-10-18)25(31)28-22(26(32)27-15-6-16-29(2)3)17-20-13-14-24(35-20)21-7-4-5-8-23(21)30(33)34/h4-5,7-14,17H,6,15-16H2,1-3H3,(H,27,32)(H,28,31)/b22-17-	AAVOXWIZJYSGEP-XLNRJJMWSA-N	53105	CHEMBL1315054::MLS001164598::N-[(Z)-1-[3-(dimethylamino)propylcarbamoyl]-2-[5-(2-nitrophenyl)-2-furyl]vinyl]-4-methyl-benzamide::N-[(Z)-3-[3-(dimethylamino)propylamino]-1-[5-(2-nitrophenyl)-2-furanyl]-3-oxoprop-1-en-2-yl]-4-methylbenzamide::N-[(Z)-3-[3-(dimethylamino)propylamino]-1-[5-(2-nitrophenyl)furan-2-yl]-3-oxidanylidene-prop-1-en-2-yl]-4-methyl-benzamide::N-[(Z)-3-[3-(dimethylamino)propyla…	3C-like proteinase (3CL-PRO)	Human SARS coronavirus	9930								ChEMBL	10.1016/j.bmcl.2011.03.034	21470860			Nguyen, TT; Ryu, HJ; Lee, SH; Hwang, S; Breton, V; Rhee, JH; Kim, D	Chonnam National University	http://www.bindingdb.org/bind/chemsearch/marvin/MolStructure.jsp?monomerid=53105	http://www.bindingdb.org/jsp/dbsearch/PrimarySearch_ki.jsp?energyterm=kJ/mole&tag=pol&polymerid=4753&target=3C-like+proteinase+%283CL-PRO%29&column=ki&startPg=0&Increment=50&submit=Search	http://www.bindingdb.org/jsp/dbsearch/PrimarySearch_ki.jsp?energyterm=kJ/mole&tag=r21&monomerid=53105&enzyme=3C-like+proteinase+%283CL-PRO%29&column=ki&startPg=0&Increment=50&submit=Search			2131982	252633238		CHEMBL1315054				ZINC03375982	1	MESLVLGVNEKTHVQLSLPVLQVRDVLVRGFGDSVEEALSEAREHLKNGTCGLVELEKGVLPQLEQPYVFIKRSDALSTNHGHKVVELVAEMDGIQYGRSGITLGVLVPHVGETPIAYRNVLLRKNGNKGAGGHSYGIDLKSYDLGDELGTDPIEDYEQNWNTKHGSGALRELTRELNGGAVTRYVDNNFCGPDGYPLDCIKDFLARAGKSMCTLSEQLDYIESKRGVYCCRDHEHEIAWFTERSDKSYEHQTPFEIKSAKKFDTFKGECPKFVFPLNSKVKVIQPRVEKKKTEGFMGRIRSVYPVASPQECNNMHLSTLMKCNHCDEVSWQTCDFLKATCEHCGTENLVIEGPTTCGYLPTNAVVKMPCPACQDPEIGPEHSVADYHNHSNIETRLRK…	1Q2W,1QZ8,1UJ1,1UK2,1UK3,1UK4,1UW7,1WOF,1Z1I,2A5A,2A5I,2A5K,2ACF,2AHM,2ALV,2AMD,2AMQ,2BX3,2BX4,2C3S,2D2D,2DUC,2FAV,2FE8,2FYG,2G9T,2GA6,2GDT,2GRI,2GT7,2GT8,2GTB,2GX4,2GZ7,2GZ8,2GZ9,2H2Z,2HOB,2HSX,2IDY,2JZF,2K7X,2K87,2KAF,2LIZ,2OP9,2OZK,2RNK,2V6N,2VJ1,2XYQ,2XYR,2XYV,2Z3C,2Z3D,2Z3E,2Z94,2Z9G,2Z9J,2Z9K,2Z9L,2ZU4,2ZU5,3D62,3E91,3E9S,3EA7,3EA8,3EBN,3IWM,3M3V,3MJ5,3R24,3SN8,3SNA,3SNB,3SNC,3SND,3SNE,3SZN…	Replicase polyprotein 1ab	R1AB_CVHSA	P0C6X7	P59641,Q6WGN0,Q7T697,Q808C0,Q80BV7,Q80BV8,Q80E51
50499675	CC1=NN(C(=O)\C1=C/c1ccc(o1)-c1cc(Cl)ccc1C(O)=O)c1cccc(c1)C(O)=O	InChI=1S/C23H15ClN2O6/c1-12-18(21(27)26(25-12)15-4-2-3-13(9-15)22(28)29)11-16-6-8-20(32-16)19-10-14(24)5-7-17(19)23(30)31/h2-11H,1H3,(H,28,29)(H,30,31)/b18-11-	RMHAQSDBWLXMGQ-WQRHYEAKSA-N	50176801	CHEMBL3810366	3C-like proteinase (3CL-PRO)	Human SARS coronavirus		>50000							ChEMBL	10.1016/j.bmc.2016.05.013	27240464			Kumar, V; Tan, KP; Wang, YM; Lin, SW; Liang, PH	Academia Sinica	http://www.bindingdb.org/bind/chemsearch/marvin/MolStructure.jsp?monomerid=50176801	http://www.bindingdb.org/jsp/dbsearch/PrimarySearch_ki.jsp?energyterm=kJ/mole&tag=pol&polymerid=4753&target=3C-like+proteinase+%283CL-PRO%29&column=ki&startPg=0&Increment=50&submit=Search	http://www.bindingdb.org/jsp/dbsearch/PrimarySearch_ki.jsp?energyterm=kJ/mole&tag=r21&monomerid=50176801&enzyme=3C-like+proteinase+%283CL-PRO%29&column=ki&startPg=0&Increment=50&submit=Search			6026688	346549130		CHEMBL3810366					1	MESLVLGVNEKTHVQLSLPVLQVRDVLVRGFGDSVEEALSEAREHLKNGTCGLVELEKGVLPQLEQPYVFIKRSDALSTNHGHKVVELVAEMDGIQYGRSGITLGVLVPHVGETPIAYRNVLLRKNGNKGAGGHSYGIDLKSYDLGDELGTDPIEDYEQNWNTKHGSGALRELTRELNGGAVTRYVDNNFCGPDGYPLDCIKDFLARAGKSMCTLSEQLDYIESKRGVYCCRDHEHEIAWFTERSDKSYEHQTPFEIKSAKKFDTFKGECPKFVFPLNSKVKVIQPRVEKKKTEGFMGRIRSVYPVASPQECNNMHLSTLMKCNHCDEVSWQTCDFLKATCEHCGTENLVIEGPTTCGYLPTNAVVKMPCPACQDPEIGPEHSVADYHNHSNIETRLRK…	1Q2W,1QZ8,1UJ1,1UK2,1UK3,1UK4,1UW7,1WOF,1Z1I,2A5A,2A5I,2A5K,2ACF,2AHM,2ALV,2AMD,2AMQ,2BX3,2BX4,2C3S,2D2D,2DUC,2FAV,2FE8,2FYG,2G9T,2GA6,2GDT,2GRI,2GT7,2GT8,2GTB,2GX4,2GZ7,2GZ8,2GZ9,2H2Z,2HOB,2HSX,2IDY,2JZF,2K7X,2K87,2KAF,2LIZ,2OP9,2OZK,2RNK,2V6N,2VJ1,2XYQ,2XYR,2XYV,2Z3C,2Z3D,2Z3E,2Z94,2Z9G,2Z9J,2Z9K,2Z9L,2ZU4,2ZU5,3D62,3E91,3E9S,3EA7,3EA8,3EBN,3IWM,3M3V,3MJ5,3R24,3SN8,3SNA,3SNB,3SNC,3SND,3SNE,3SZN…	Replicase polyprotein 1ab	R1AB_CVHSA	P0C6X7	P59641,Q6WGN0,Q7T697,Q808C0,Q80BV7,Q80BV8,Q80E51
50499676	OC(=O)c1cccc(c1)N1N=C(\C(=C\c2ccc(o2)-c2cc(Cl)ccc2C(O)=O)C1=O)C(F)(F)F	InChI=1S/C23H12ClF3N2O6/c24-12-4-6-15(22(33)34)16(9-12)18-7-5-14(35-18)10-17-19(23(25,26)27)28-29(20(17)30)13-3-1-2-11(8-13)21(31)32/h1-10H,(H,31,32)(H,33,34)/b17-10-	ZMTQIEODEJVNQW-YVLHZVERSA-N	50176802	CHEMBL3810109	3C-like proteinase (3CL-PRO)	Human SARS coronavirus		>50000							ChEMBL	10.1016/j.bmc.2016.05.013	27240464			Kumar, V; Tan, KP; Wang, YM; Lin, SW; Liang, PH	Academia Sinica	http://www.bindingdb.org/bind/chemsearch/marvin/MolStructure.jsp?monomerid=50176802	http://www.bindingdb.org/jsp/dbsearch/PrimarySearch_ki.jsp?energyterm=kJ/mole&tag=pol&polymerid=4753&target=3C-like+proteinase+%283CL-PRO%29&column=ki&startPg=0&Increment=50&submit=Search	http://www.bindingdb.org/jsp/dbsearch/PrimarySearch_ki.jsp?energyterm=kJ/mole&tag=r21&monomerid=50176802&enzyme=3C-like+proteinase+%283CL-PRO%29&column=ki&startPg=0&Increment=50&submit=Search			127045387	346549131		CHEMBL3810109					1	MESLVLGVNEKTHVQLSLPVLQVRDVLVRGFGDSVEEALSEAREHLKNGTCGLVELEKGVLPQLEQPYVFIKRSDALSTNHGHKVVELVAEMDGIQYGRSGITLGVLVPHVGETPIAYRNVLLRKNGNKGAGGHSYGIDLKSYDLGDELGTDPIEDYEQNWNTKHGSGALRELTRELNGGAVTRYVDNNFCGPDGYPLDCIKDFLARAGKSMCTLSEQLDYIESKRGVYCCRDHEHEIAWFTERSDKSYEHQTPFEIKSAKKFDTFKGECPKFVFPLNSKVKVIQPRVEKKKTEGFMGRIRSVYPVASPQECNNMHLSTLMKCNHCDEVSWQTCDFLKATCEHCGTENLVIEGPTTCGYLPTNAVVKMPCPACQDPEIGPEHSVADYHNHSNIETRLRK…	1Q2W,1QZ8,1UJ1,1UK2,1UK3,1UK4,1UW7,1WOF,1Z1I,2A5A,2A5I,2A5K,2ACF,2AHM,2ALV,2AMD,2AMQ,2BX3,2BX4,2C3S,2D2D,2DUC,2FAV,2FE8,2FYG,2G9T,2GA6,2GDT,2GRI,2GT7,2GT8,2GTB,2GX4,2GZ7,2GZ8,2GZ9,2H2Z,2HOB,2HSX,2IDY,2JZF,2K7X,2K87,2KAF,2LIZ,2OP9,2OZK,2RNK,2V6N,2VJ1,2XYQ,2XYR,2XYV,2Z3C,2Z3D,2Z3E,2Z94,2Z9G,2Z9J,2Z9K,2Z9L,2ZU4,2ZU5,3D62,3E91,3E9S,3EA7,3EA8,3EBN,3IWM,3M3V,3MJ5,3R24,3SN8,3SNA,3SNB,3SNC,3SND,3SNE,3SZN…	Replicase polyprotein 1ab	R1AB_CVHSA	P0C6X7	P59641,Q6WGN0,Q7T697,Q808C0,Q80BV7,Q80BV8,Q80E51
50499677	OC(=O)c1cccc(c1)N1N=C(\C(=C/c2ccc(o2)-c2ccccc2C(O)=O)C1=O)C(F)(F)F	InChI=1S/C23H13F3N2O6/c24-23(25,26)19-17(20(29)28(27-19)13-5-3-4-12(10-13)21(30)31)11-14-8-9-18(34-14)15-6-1-2-7-16(15)22(32)33/h1-11H,(H,30,31)(H,32,33)/b17-11+	DWSJOSLXKQYZQI-GZTJUZNOSA-N	50176803	CHEMBL3808558	3C-like proteinase (3CL-PRO)	Human SARS coronavirus		>50000							ChEMBL	10.1016/j.bmc.2016.05.013	27240464			Kumar, V; Tan, KP; Wang, YM; Lin, SW; Liang, PH	Academia Sinica	http://www.bindingdb.org/bind/chemsearch/marvin/MolStructure.jsp?monomerid=50176803	http://www.bindingdb.org/jsp/dbsearch/PrimarySearch_ki.jsp?energyterm=kJ/mole&tag=pol&polymerid=4753&target=3C-like+proteinase+%283CL-PRO%29&column=ki&startPg=0&Increment=50&submit=Search	http://www.bindingdb.org/jsp/dbsearch/PrimarySearch_ki.jsp?energyterm=kJ/mole&tag=r21&monomerid=50176803&enzyme=3C-like+proteinase+%283CL-PRO%29&column=ki&startPg=0&Increment=50&submit=Search			127045392	346549132		CHEMBL3808558					1	MESLVLGVNEKTHVQLSLPVLQVRDVLVRGFGDSVEEALSEAREHLKNGTCGLVELEKGVLPQLEQPYVFIKRSDALSTNHGHKVVELVAEMDGIQYGRSGITLGVLVPHVGETPIAYRNVLLRKNGNKGAGGHSYGIDLKSYDLGDELGTDPIEDYEQNWNTKHGSGALRELTRELNGGAVTRYVDNNFCGPDGYPLDCIKDFLARAGKSMCTLSEQLDYIESKRGVYCCRDHEHEIAWFTERSDKSYEHQTPFEIKSAKKFDTFKGECPKFVFPLNSKVKVIQPRVEKKKTEGFMGRIRSVYPVASPQECNNMHLSTLMKCNHCDEVSWQTCDFLKATCEHCGTENLVIEGPTTCGYLPTNAVVKMPCPACQDPEIGPEHSVADYHNHSNIETRLRK…	1Q2W,1QZ8,1UJ1,1UK2,1UK3,1UK4,1UW7,1WOF,1Z1I,2A5A,2A5I,2A5K,2ACF,2AHM,2ALV,2AMD,2AMQ,2BX3,2BX4,2C3S,2D2D,2DUC,2FAV,2FE8,2FYG,2G9T,2GA6,2GDT,2GRI,2GT7,2GT8,2GTB,2GX4,2GZ7,2GZ8,2GZ9,2H2Z,2HOB,2HSX,2IDY,2JZF,2K7X,2K87,2KAF,2LIZ,2OP9,2OZK,2RNK,2V6N,2VJ1,2XYQ,2XYR,2XYV,2Z3C,2Z3D,2Z3E,2Z94,2Z9G,2Z9J,2Z9K,2Z9L,2ZU4,2ZU5,3D62,3E91,3E9S,3EA7,3EA8,3EBN,3IWM,3M3V,3MJ5,3R24,3SN8,3SNA,3SNB,3SNC,3SND,3SNE,3SZN…	Replicase polyprotein 1ab	R1AB_CVHSA	P0C6X7	P59641,Q6WGN0,Q7T697,Q808C0,Q80BV7,Q80BV8,Q80E51
50499678	OC(=O)c1cccc(c1)N1N=C(\C(=C\c2ccc(o2)-c2cc(Cl)ccc2C(O)=O)C1=O)c1ccccc1	InChI=1S/C28H17ClN2O6/c29-18-9-11-21(28(35)36)22(14-18)24-12-10-20(37-24)15-23-25(16-5-2-1-3-6-16)30-31(26(23)32)19-8-4-7-17(13-19)27(33)34/h1-15H,(H,33,34)(H,35,36)/b23-15-	JNEXOTBREMZSAW-HAHDFKILSA-N	50176804	CHEMBL3808795	3C-like proteinase (3CL-PRO)	Human SARS coronavirus		44700							ChEMBL	10.1016/j.bmc.2016.05.013	27240464			Kumar, V; Tan, KP; Wang, YM; Lin, SW; Liang, PH	Academia Sinica	http://www.bindingdb.org/bind/chemsearch/marvin/MolStructure.jsp?monomerid=50176804	http://www.bindingdb.org/jsp/dbsearch/PrimarySearch_ki.jsp?energyterm=kJ/mole&tag=pol&polymerid=4753&target=3C-like+proteinase+%283CL-PRO%29&column=ki&startPg=0&Increment=50&submit=Search	http://www.bindingdb.org/jsp/dbsearch/PrimarySearch_ki.jsp?energyterm=kJ/mole&tag=r21&monomerid=50176804&enzyme=3C-like+proteinase+%283CL-PRO%29&column=ki&startPg=0&Increment=50&submit=Search			127045393	346549133		CHEMBL3808795					1	MESLVLGVNEKTHVQLSLPVLQVRDVLVRGFGDSVEEALSEAREHLKNGTCGLVELEKGVLPQLEQPYVFIKRSDALSTNHGHKVVELVAEMDGIQYGRSGITLGVLVPHVGETPIAYRNVLLRKNGNKGAGGHSYGIDLKSYDLGDELGTDPIEDYEQNWNTKHGSGALRELTRELNGGAVTRYVDNNFCGPDGYPLDCIKDFLARAGKSMCTLSEQLDYIESKRGVYCCRDHEHEIAWFTERSDKSYEHQTPFEIKSAKKFDTFKGECPKFVFPLNSKVKVIQPRVEKKKTEGFMGRIRSVYPVASPQECNNMHLSTLMKCNHCDEVSWQTCDFLKATCEHCGTENLVIEGPTTCGYLPTNAVVKMPCPACQDPEIGPEHSVADYHNHSNIETRLRK…	1Q2W,1QZ8,1UJ1,1UK2,1UK3,1UK4,1UW7,1WOF,1Z1I,2A5A,2A5I,2A5K,2ACF,2AHM,2ALV,2AMD,2AMQ,2BX3,2BX4,2C3S,2D2D,2DUC,2FAV,2FE8,2FYG,2G9T,2GA6,2GDT,2GRI,2GT7,2GT8,2GTB,2GX4,2GZ7,2GZ8,2GZ9,2H2Z,2HOB,2HSX,2IDY,2JZF,2K7X,2K87,2KAF,2LIZ,2OP9,2OZK,2RNK,2V6N,2VJ1,2XYQ,2XYR,2XYV,2Z3C,2Z3D,2Z3E,2Z94,2Z9G,2Z9J,2Z9K,2Z9L,2ZU4,2ZU5,3D62,3E91,3E9S,3EA7,3EA8,3EBN,3IWM,3M3V,3MJ5,3R24,3SN8,3SNA,3SNB,3SNC,3SND,3SNE,3SZN…	Replicase polyprotein 1ab	R1AB_CVHSA	P0C6X7	P59641,Q6WGN0,Q7T697,Q808C0,Q80BV7,Q80BV8,Q80E51
50499679	CC1=NN(C(=O)\C1=C/c1ccc(o1)-c1cc(Cl)ccc1C(O)=O)c1ccccc1	InChI=1S/C22H15ClN2O4/c1-13-18(21(26)25(24-13)15-5-3-2-4-6-15)12-16-8-10-20(29-16)19-11-14(23)7-9-17(19)22(27)28/h2-12H,1H3,(H,27,28)/b18-12-	BOZXTRFDIDZQLX-PDGQHHTCSA-N	50176805	CHEMBL3810010	3C-like proteinase (3CL-PRO)	Human SARS coronavirus		>50000							ChEMBL	10.1016/j.bmc.2016.05.013	27240464			Kumar, V; Tan, KP; Wang, YM; Lin, SW; Liang, PH	Academia Sinica	http://www.bindingdb.org/bind/chemsearch/marvin/MolStructure.jsp?monomerid=50176805	http://www.bindingdb.org/jsp/dbsearch/PrimarySearch_ki.jsp?energyterm=kJ/mole&tag=pol&polymerid=4753&target=3C-like+proteinase+%283CL-PRO%29&column=ki&startPg=0&Increment=50&submit=Search	http://www.bindingdb.org/jsp/dbsearch/PrimarySearch_ki.jsp?energyterm=kJ/mole&tag=r21&monomerid=50176805&enzyme=3C-like+proteinase+%283CL-PRO%29&column=ki&startPg=0&Increment=50&submit=Search			127045394	346549134		CHEMBL3810010					1	MESLVLGVNEKTHVQLSLPVLQVRDVLVRGFGDSVEEALSEAREHLKNGTCGLVELEKGVLPQLEQPYVFIKRSDALSTNHGHKVVELVAEMDGIQYGRSGITLGVLVPHVGETPIAYRNVLLRKNGNKGAGGHSYGIDLKSYDLGDELGTDPIEDYEQNWNTKHGSGALRELTRELNGGAVTRYVDNNFCGPDGYPLDCIKDFLARAGKSMCTLSEQLDYIESKRGVYCCRDHEHEIAWFTERSDKSYEHQTPFEIKSAKKFDTFKGECPKFVFPLNSKVKVIQPRVEKKKTEGFMGRIRSVYPVASPQECNNMHLSTLMKCNHCDEVSWQTCDFLKATCEHCGTENLVIEGPTTCGYLPTNAVVKMPCPACQDPEIGPEHSVADYHNHSNIETRLRK…	1Q2W,1QZ8,1UJ1,1UK2,1UK3,1UK4,1UW7,1WOF,1Z1I,2A5A,2A5I,2A5K,2ACF,2AHM,2ALV,2AMD,2AMQ,2BX3,2BX4,2C3S,2D2D,2DUC,2FAV,2FE8,2FYG,2G9T,2GA6,2GDT,2GRI,2GT7,2GT8,2GTB,2GX4,2GZ7,2GZ8,2GZ9,2H2Z,2HOB,2HSX,2IDY,2JZF,2K7X,2K87,2KAF,2LIZ,2OP9,2OZK,2RNK,2V6N,2VJ1,2XYQ,2XYR,2XYV,2Z3C,2Z3D,2Z3E,2Z94,2Z9G,2Z9J,2Z9K,2Z9L,2ZU4,2ZU5,3D62,3E91,3E9S,3EA7,3EA8,3EBN,3IWM,3M3V,3MJ5,3R24,3SN8,3SNA,3SNB,3SNC,3SND,3SNE,3SZN…	Replicase polyprotein 1ab	R1AB_CVHSA	P0C6X7	P59641,Q6WGN0,Q7T697,Q808C0,Q80BV7,Q80BV8,Q80E51
50499680	OC(=O)c1ccc(Cl)cc1-c1ccc(\C=C2/C(=O)N(N=C2c2ccccc2)c2ccccc2)o1	InChI=1S/C27H17ClN2O4/c28-18-11-13-21(27(32)33)22(15-18)24-14-12-20(34-24)16-23-25(17-7-3-1-4-8-17)29-30(26(23)31)19-9-5-2-6-10-19/h1-16H,(H,32,33)/b23-16-	YIPRRRUTHXSMOT-KQWNVCNZSA-N	50176806	CHEMBL3810328	3C-like proteinase (3CL-PRO)	Human SARS coronavirus		16400							ChEMBL	10.1016/j.bmc.2016.05.013	27240464			Kumar, V; Tan, KP; Wang, YM; Lin, SW; Liang, PH	Academia Sinica	http://www.bindingdb.org/bind/chemsearch/marvin/MolStructure.jsp?monomerid=50176806	http://www.bindingdb.org/jsp/dbsearch/PrimarySearch_ki.jsp?energyterm=kJ/mole&tag=pol&polymerid=4753&target=3C-like+proteinase+%283CL-PRO%29&column=ki&startPg=0&Increment=50&submit=Search	http://www.bindingdb.org/jsp/dbsearch/PrimarySearch_ki.jsp?energyterm=kJ/mole&tag=r21&monomerid=50176806&enzyme=3C-like+proteinase+%283CL-PRO%29&column=ki&startPg=0&Increment=50&submit=Search			102341658	346549135		CHEMBL3810328					1	MESLVLGVNEKTHVQLSLPVLQVRDVLVRGFGDSVEEALSEAREHLKNGTCGLVELEKGVLPQLEQPYVFIKRSDALSTNHGHKVVELVAEMDGIQYGRSGITLGVLVPHVGETPIAYRNVLLRKNGNKGAGGHSYGIDLKSYDLGDELGTDPIEDYEQNWNTKHGSGALRELTRELNGGAVTRYVDNNFCGPDGYPLDCIKDFLARAGKSMCTLSEQLDYIESKRGVYCCRDHEHEIAWFTERSDKSYEHQTPFEIKSAKKFDTFKGECPKFVFPLNSKVKVIQPRVEKKKTEGFMGRIRSVYPVASPQECNNMHLSTLMKCNHCDEVSWQTCDFLKATCEHCGTENLVIEGPTTCGYLPTNAVVKMPCPACQDPEIGPEHSVADYHNHSNIETRLRK…	1Q2W,1QZ8,1UJ1,1UK2,1UK3,1UK4,1UW7,1WOF,1Z1I,2A5A,2A5I,2A5K,2ACF,2AHM,2ALV,2AMD,2AMQ,2BX3,2BX4,2C3S,2D2D,2DUC,2FAV,2FE8,2FYG,2G9T,2GA6,2GDT,2GRI,2GT7,2GT8,2GTB,2GX4,2GZ7,2GZ8,2GZ9,2H2Z,2HOB,2HSX,2IDY,2JZF,2K7X,2K87,2KAF,2LIZ,2OP9,2OZK,2RNK,2V6N,2VJ1,2XYQ,2XYR,2XYV,2Z3C,2Z3D,2Z3E,2Z94,2Z9G,2Z9J,2Z9K,2Z9L,2ZU4,2ZU5,3D62,3E91,3E9S,3EA7,3EA8,3EBN,3IWM,3M3V,3MJ5,3R24,3SN8,3SNA,3SNB,3SNC,3SND,3SNE,3SZN…	Replicase polyprotein 1ab	R1AB_CVHSA	P0C6X7	P59641,Q6WGN0,Q7T697,Q808C0,Q80BV7,Q80BV8,Q80E51
50499681	OC(=O)c1ccc(Cl)cc1-c1ccc(\C=C2/C(=O)N(N=C2c2ccccc2)c2ccc(F)cc2)o1	InChI=1S/C27H16ClFN2O4/c28-17-6-12-21(27(33)34)22(14-17)24-13-11-20(35-24)15-23-25(16-4-2-1-3-5-16)30-31(26(23)32)19-9-7-18(29)8-10-19/h1-15H,(H,33,34)/b23-15-	YQHUXSFPUWHNEN-HAHDFKILSA-N	50176807	CHEMBL3808658	3C-like proteinase (3CL-PRO)	Human SARS coronavirus		20200							ChEMBL	10.1016/j.bmc.2016.05.013	27240464			Kumar, V; Tan, KP; Wang, YM; Lin, SW; Liang, PH	Academia Sinica	http://www.bindingdb.org/bind/chemsearch/marvin/MolStructure.jsp?monomerid=50176807	http://www.bindingdb.org/jsp/dbsearch/PrimarySearch_ki.jsp?energyterm=kJ/mole&tag=pol&polymerid=4753&target=3C-like+proteinase+%283CL-PRO%29&column=ki&startPg=0&Increment=50&submit=Search	http://www.bindingdb.org/jsp/dbsearch/PrimarySearch_ki.jsp?energyterm=kJ/mole&tag=r21&monomerid=50176807&enzyme=3C-like+proteinase+%283CL-PRO%29&column=ki&startPg=0&Increment=50&submit=Search			127043455	346549136		CHEMBL3808658					1	MESLVLGVNEKTHVQLSLPVLQVRDVLVRGFGDSVEEALSEAREHLKNGTCGLVELEKGVLPQLEQPYVFIKRSDALSTNHGHKVVELVAEMDGIQYGRSGITLGVLVPHVGETPIAYRNVLLRKNGNKGAGGHSYGIDLKSYDLGDELGTDPIEDYEQNWNTKHGSGALRELTRELNGGAVTRYVDNNFCGPDGYPLDCIKDFLARAGKSMCTLSEQLDYIESKRGVYCCRDHEHEIAWFTERSDKSYEHQTPFEIKSAKKFDTFKGECPKFVFPLNSKVKVIQPRVEKKKTEGFMGRIRSVYPVASPQECNNMHLSTLMKCNHCDEVSWQTCDFLKATCEHCGTENLVIEGPTTCGYLPTNAVVKMPCPACQDPEIGPEHSVADYHNHSNIETRLRK…	1Q2W,1QZ8,1UJ1,1UK2,1UK3,1UK4,1UW7,1WOF,1Z1I,2A5A,2A5I,2A5K,2ACF,2AHM,2ALV,2AMD,2AMQ,2BX3,2BX4,2C3S,2D2D,2DUC,2FAV,2FE8,2FYG,2G9T,2GA6,2GDT,2GRI,2GT7,2GT8,2GTB,2GX4,2GZ7,2GZ8,2GZ9,2H2Z,2HOB,2HSX,2IDY,2JZF,2K7X,2K87,2KAF,2LIZ,2OP9,2OZK,2RNK,2V6N,2VJ1,2XYQ,2XYR,2XYV,2Z3C,2Z3D,2Z3E,2Z94,2Z9G,2Z9J,2Z9K,2Z9L,2ZU4,2ZU5,3D62,3E91,3E9S,3EA7,3EA8,3EBN,3IWM,3M3V,3MJ5,3R24,3SN8,3SNA,3SNB,3SNC,3SND,3SNE,3SZN…	Replicase polyprotein 1ab	R1AB_CVHSA	P0C6X7	P59641,Q6WGN0,Q7T697,Q808C0,Q80BV7,Q80BV8,Q80E51
50499682	CC(C)c1ccc(cc1)N1N=C(\C(=C\c2ccc(o2)-c2cc(Cl)ccc2C(O)=O)C1=O)c1ccccc1	InChI=1S/C30H23ClN2O4/c1-18(2)19-8-11-22(12-9-19)33-29(34)26(28(32-33)20-6-4-3-5-7-20)17-23-13-15-27(37-23)25-16-21(31)10-14-24(25)30(35)36/h3-18H,1-2H3,(H,35,36)/b26-17-	SVQAGVLZHTXJJV-ONUIUJJFSA-N	50176809	CHEMBL3809329	3C-like proteinase (3CL-PRO)	Human SARS coronavirus		6000							ChEMBL	10.1016/j.bmc.2016.05.013	27240464			Kumar, V; Tan, KP; Wang, YM; Lin, SW; Liang, PH	Academia Sinica	http://www.bindingdb.org/bind/chemsearch/marvin/MolStructure.jsp?monomerid=50176809	http://www.bindingdb.org/jsp/dbsearch/PrimarySearch_ki.jsp?energyterm=kJ/mole&tag=pol&polymerid=4753&target=3C-like+proteinase+%283CL-PRO%29&column=ki&startPg=0&Increment=50&submit=Search	http://www.bindingdb.org/jsp/dbsearch/PrimarySearch_ki.jsp?energyterm=kJ/mole&tag=r21&monomerid=50176809&enzyme=3C-like+proteinase+%283CL-PRO%29&column=ki&startPg=0&Increment=50&submit=Search			127043641	346549137		CHEMBL3809329					1	MESLVLGVNEKTHVQLSLPVLQVRDVLVRGFGDSVEEALSEAREHLKNGTCGLVELEKGVLPQLEQPYVFIKRSDALSTNHGHKVVELVAEMDGIQYGRSGITLGVLVPHVGETPIAYRNVLLRKNGNKGAGGHSYGIDLKSYDLGDELGTDPIEDYEQNWNTKHGSGALRELTRELNGGAVTRYVDNNFCGPDGYPLDCIKDFLARAGKSMCTLSEQLDYIESKRGVYCCRDHEHEIAWFTERSDKSYEHQTPFEIKSAKKFDTFKGECPKFVFPLNSKVKVIQPRVEKKKTEGFMGRIRSVYPVASPQECNNMHLSTLMKCNHCDEVSWQTCDFLKATCEHCGTENLVIEGPTTCGYLPTNAVVKMPCPACQDPEIGPEHSVADYHNHSNIETRLRK…	1Q2W,1QZ8,1UJ1,1UK2,1UK3,1UK4,1UW7,1WOF,1Z1I,2A5A,2A5I,2A5K,2ACF,2AHM,2ALV,2AMD,2AMQ,2BX3,2BX4,2C3S,2D2D,2DUC,2FAV,2FE8,2FYG,2G9T,2GA6,2GDT,2GRI,2GT7,2GT8,2GTB,2GX4,2GZ7,2GZ8,2GZ9,2H2Z,2HOB,2HSX,2IDY,2JZF,2K7X,2K87,2KAF,2LIZ,2OP9,2OZK,2RNK,2V6N,2VJ1,2XYQ,2XYR,2XYV,2Z3C,2Z3D,2Z3E,2Z94,2Z9G,2Z9J,2Z9K,2Z9L,2ZU4,2ZU5,3D62,3E91,3E9S,3EA7,3EA8,3EBN,3IWM,3M3V,3MJ5,3R24,3SN8,3SNA,3SNB,3SNC,3SND,3SNE,3SZN…	Replicase polyprotein 1ab	R1AB_CVHSA	P0C6X7	P59641,Q6WGN0,Q7T697,Q808C0,Q80BV7,Q80BV8,Q80E51
50499683	CC(C)(C)c1ccc(cc1)N1N=C(\C(=C\c2ccc(o2)-c2cc(Cl)ccc2C(O)=O)C1=O)c1ccccc1	InChI=1S/C31H25ClN2O4/c1-31(2,3)20-9-12-22(13-10-20)34-29(35)26(28(33-34)19-7-5-4-6-8-19)18-23-14-16-27(38-23)25-17-21(32)11-15-24(25)30(36)37/h4-18H,1-3H3,(H,36,37)/b26-18-	FCOYPXSNXIJBGX-ITYLOYPMSA-N	50176810	CHEMBL3808427	3C-like proteinase (3CL-PRO)	Human SARS coronavirus		5800							ChEMBL	10.1016/j.bmc.2016.05.013	27240464			Kumar, V; Tan, KP; Wang, YM; Lin, SW; Liang, PH	Academia Sinica	http://www.bindingdb.org/bind/chemsearch/marvin/MolStructure.jsp?monomerid=50176810	http://www.bindingdb.org/jsp/dbsearch/PrimarySearch_ki.jsp?energyterm=kJ/mole&tag=pol&polymerid=4753&target=3C-like+proteinase+%283CL-PRO%29&column=ki&startPg=0&Increment=50&submit=Search	http://www.bindingdb.org/jsp/dbsearch/PrimarySearch_ki.jsp?energyterm=kJ/mole&tag=r21&monomerid=50176810&enzyme=3C-like+proteinase+%283CL-PRO%29&column=ki&startPg=0&Increment=50&submit=Search			127043642	346549138		CHEMBL3808427					1	MESLVLGVNEKTHVQLSLPVLQVRDVLVRGFGDSVEEALSEAREHLKNGTCGLVELEKGVLPQLEQPYVFIKRSDALSTNHGHKVVELVAEMDGIQYGRSGITLGVLVPHVGETPIAYRNVLLRKNGNKGAGGHSYGIDLKSYDLGDELGTDPIEDYEQNWNTKHGSGALRELTRELNGGAVTRYVDNNFCGPDGYPLDCIKDFLARAGKSMCTLSEQLDYIESKRGVYCCRDHEHEIAWFTERSDKSYEHQTPFEIKSAKKFDTFKGECPKFVFPLNSKVKVIQPRVEKKKTEGFMGRIRSVYPVASPQECNNMHLSTLMKCNHCDEVSWQTCDFLKATCEHCGTENLVIEGPTTCGYLPTNAVVKMPCPACQDPEIGPEHSVADYHNHSNIETRLRK…	1Q2W,1QZ8,1UJ1,1UK2,1UK3,1UK4,1UW7,1WOF,1Z1I,2A5A,2A5I,2A5K,2ACF,2AHM,2ALV,2AMD,2AMQ,2BX3,2BX4,2C3S,2D2D,2DUC,2FAV,2FE8,2FYG,2G9T,2GA6,2GDT,2GRI,2GT7,2GT8,2GTB,2GX4,2GZ7,2GZ8,2GZ9,2H2Z,2HOB,2HSX,2IDY,2JZF,2K7X,2K87,2KAF,2LIZ,2OP9,2OZK,2RNK,2V6N,2VJ1,2XYQ,2XYR,2XYV,2Z3C,2Z3D,2Z3E,2Z94,2Z9G,2Z9J,2Z9K,2Z9L,2ZU4,2ZU5,3D62,3E91,3E9S,3EA7,3EA8,3EBN,3IWM,3M3V,3MJ5,3R24,3SN8,3SNA,3SNB,3SNC,3SND,3SNE,3SZN…	Replicase polyprotein 1ab	R1AB_CVHSA	P0C6X7	P59641,Q6WGN0,Q7T697,Q808C0,Q80BV7,Q80BV8,Q80E51
50499684	O=C1N(N=C(\C1=C\c1ccc(o1)-c1ccccc1)c1ccccc1)c1ccccc1	InChI=1S/C26H18N2O2/c29-26-23(18-22-16-17-24(30-22)19-10-4-1-5-11-19)25(20-12-6-2-7-13-20)27-28(26)21-14-8-3-9-15-21/h1-18H/b23-18-	QPKMQJHQRSKMGY-NKFKGCMQSA-N	50176811	CHEMBL3810058	3C-like proteinase (3CL-PRO)	Human SARS coronavirus		>50000							ChEMBL	10.1016/j.bmc.2016.05.013	27240464			Kumar, V; Tan, KP; Wang, YM; Lin, SW; Liang, PH	Academia Sinica	http://www.bindingdb.org/bind/chemsearch/marvin/MolStructure.jsp?monomerid=50176811	http://www.bindingdb.org/jsp/dbsearch/PrimarySearch_ki.jsp?energyterm=kJ/mole&tag=pol&polymerid=4753&target=3C-like+proteinase+%283CL-PRO%29&column=ki&startPg=0&Increment=50&submit=Search	http://www.bindingdb.org/jsp/dbsearch/PrimarySearch_ki.jsp?energyterm=kJ/mole&tag=r21&monomerid=50176811&enzyme=3C-like+proteinase+%283CL-PRO%29&column=ki&startPg=0&Increment=50&submit=Search			127043643	346549139		CHEMBL3810058					1	MESLVLGVNEKTHVQLSLPVLQVRDVLVRGFGDSVEEALSEAREHLKNGTCGLVELEKGVLPQLEQPYVFIKRSDALSTNHGHKVVELVAEMDGIQYGRSGITLGVLVPHVGETPIAYRNVLLRKNGNKGAGGHSYGIDLKSYDLGDELGTDPIEDYEQNWNTKHGSGALRELTRELNGGAVTRYVDNNFCGPDGYPLDCIKDFLARAGKSMCTLSEQLDYIESKRGVYCCRDHEHEIAWFTERSDKSYEHQTPFEIKSAKKFDTFKGECPKFVFPLNSKVKVIQPRVEKKKTEGFMGRIRSVYPVASPQECNNMHLSTLMKCNHCDEVSWQTCDFLKATCEHCGTENLVIEGPTTCGYLPTNAVVKMPCPACQDPEIGPEHSVADYHNHSNIETRLRK…	1Q2W,1QZ8,1UJ1,1UK2,1UK3,1UK4,1UW7,1WOF,1Z1I,2A5A,2A5I,2A5K,2ACF,2AHM,2ALV,2AMD,2AMQ,2BX3,2BX4,2C3S,2D2D,2DUC,2FAV,2FE8,2FYG,2G9T,2GA6,2GDT,2GRI,2GT7,2GT8,2GTB,2GX4,2GZ7,2GZ8,2GZ9,2H2Z,2HOB,2HSX,2IDY,2JZF,2K7X,2K87,2KAF,2LIZ,2OP9,2OZK,2RNK,2V6N,2VJ1,2XYQ,2XYR,2XYV,2Z3C,2Z3D,2Z3E,2Z94,2Z9G,2Z9J,2Z9K,2Z9L,2ZU4,2ZU5,3D62,3E91,3E9S,3EA7,3EA8,3EBN,3IWM,3M3V,3MJ5,3R24,3SN8,3SNA,3SNB,3SNC,3SND,3SNE,3SZN…	Replicase polyprotein 1ab	R1AB_CVHSA	P0C6X7	P59641,Q6WGN0,Q7T697,Q808C0,Q80BV7,Q80BV8,Q80E51
50499685	OC(=O)c1cccc(c1)N1N=C(\C(=C\c2ccc(o2)-c2ccccc2)C1=O)c1ccccc1	InChI=1S/C27H18N2O4/c30-26-23(17-22-14-15-24(33-22)18-8-3-1-4-9-18)25(19-10-5-2-6-11-19)28-29(26)21-13-7-12-20(16-21)27(31)32/h1-17H,(H,31,32)/b23-17-	SQOXEZFEMGRSIQ-QJOMJCCJSA-N	50176812	CHEMBL3809861	3C-like proteinase (3CL-PRO)	Human SARS coronavirus		6400							ChEMBL	10.1016/j.bmc.2016.05.013	27240464			Kumar, V; Tan, KP; Wang, YM; Lin, SW; Liang, PH	Academia Sinica	http://www.bindingdb.org/bind/chemsearch/marvin/MolStructure.jsp?monomerid=50176812	http://www.bindingdb.org/jsp/dbsearch/PrimarySearch_ki.jsp?energyterm=kJ/mole&tag=pol&polymerid=4753&target=3C-like+proteinase+%283CL-PRO%29&column=ki&startPg=0&Increment=50&submit=Search	http://www.bindingdb.org/jsp/dbsearch/PrimarySearch_ki.jsp?energyterm=kJ/mole&tag=r21&monomerid=50176812&enzyme=3C-like+proteinase+%283CL-PRO%29&column=ki&startPg=0&Increment=50&submit=Search			127043644	346549140		CHEMBL3809861					1	MESLVLGVNEKTHVQLSLPVLQVRDVLVRGFGDSVEEALSEAREHLKNGTCGLVELEKGVLPQLEQPYVFIKRSDALSTNHGHKVVELVAEMDGIQYGRSGITLGVLVPHVGETPIAYRNVLLRKNGNKGAGGHSYGIDLKSYDLGDELGTDPIEDYEQNWNTKHGSGALRELTRELNGGAVTRYVDNNFCGPDGYPLDCIKDFLARAGKSMCTLSEQLDYIESKRGVYCCRDHEHEIAWFTERSDKSYEHQTPFEIKSAKKFDTFKGECPKFVFPLNSKVKVIQPRVEKKKTEGFMGRIRSVYPVASPQECNNMHLSTLMKCNHCDEVSWQTCDFLKATCEHCGTENLVIEGPTTCGYLPTNAVVKMPCPACQDPEIGPEHSVADYHNHSNIETRLRK…	1Q2W,1QZ8,1UJ1,1UK2,1UK3,1UK4,1UW7,1WOF,1Z1I,2A5A,2A5I,2A5K,2ACF,2AHM,2ALV,2AMD,2AMQ,2BX3,2BX4,2C3S,2D2D,2DUC,2FAV,2FE8,2FYG,2G9T,2GA6,2GDT,2GRI,2GT7,2GT8,2GTB,2GX4,2GZ7,2GZ8,2GZ9,2H2Z,2HOB,2HSX,2IDY,2JZF,2K7X,2K87,2KAF,2LIZ,2OP9,2OZK,2RNK,2V6N,2VJ1,2XYQ,2XYR,2XYV,2Z3C,2Z3D,2Z3E,2Z94,2Z9G,2Z9J,2Z9K,2Z9L,2ZU4,2ZU5,3D62,3E91,3E9S,3EA7,3EA8,3EBN,3IWM,3M3V,3MJ5,3R24,3SN8,3SNA,3SNB,3SNC,3SND,3SNE,3SZN…	Replicase polyprotein 1ab	R1AB_CVHSA	P0C6X7	P59641,Q6WGN0,Q7T697,Q808C0,Q80BV7,Q80BV8,Q80E51
50499686	CC1=NN(C(=O)\C1=C/c1ccc(o1)-c1ccccc1)c1cccc(c1)C(O)=O	InChI=1S/C22H16N2O4/c1-14-19(13-18-10-11-20(28-18)15-6-3-2-4-7-15)21(25)24(23-14)17-9-5-8-16(12-17)22(26)27/h2-13H,1H3,(H,26,27)/b19-13-	UQWUDRZSFFOCJP-UYRXBGFRSA-N	50176813	CHEMBL3809159	3C-like proteinase (3CL-PRO)	Human SARS coronavirus		>50000							ChEMBL	10.1016/j.bmc.2016.05.013	27240464			Kumar, V; Tan, KP; Wang, YM; Lin, SW; Liang, PH	Academia Sinica	http://www.bindingdb.org/bind/chemsearch/marvin/MolStructure.jsp?monomerid=50176813	http://www.bindingdb.org/jsp/dbsearch/PrimarySearch_ki.jsp?energyterm=kJ/mole&tag=pol&polymerid=4753&target=3C-like+proteinase+%283CL-PRO%29&column=ki&startPg=0&Increment=50&submit=Search	http://www.bindingdb.org/jsp/dbsearch/PrimarySearch_ki.jsp?energyterm=kJ/mole&tag=r21&monomerid=50176813&enzyme=3C-like+proteinase+%283CL-PRO%29&column=ki&startPg=0&Increment=50&submit=Search			50885062	346549141		CHEMBL3809159					1	MESLVLGVNEKTHVQLSLPVLQVRDVLVRGFGDSVEEALSEAREHLKNGTCGLVELEKGVLPQLEQPYVFIKRSDALSTNHGHKVVELVAEMDGIQYGRSGITLGVLVPHVGETPIAYRNVLLRKNGNKGAGGHSYGIDLKSYDLGDELGTDPIEDYEQNWNTKHGSGALRELTRELNGGAVTRYVDNNFCGPDGYPLDCIKDFLARAGKSMCTLSEQLDYIESKRGVYCCRDHEHEIAWFTERSDKSYEHQTPFEIKSAKKFDTFKGECPKFVFPLNSKVKVIQPRVEKKKTEGFMGRIRSVYPVASPQECNNMHLSTLMKCNHCDEVSWQTCDFLKATCEHCGTENLVIEGPTTCGYLPTNAVVKMPCPACQDPEIGPEHSVADYHNHSNIETRLRK…	1Q2W,1QZ8,1UJ1,1UK2,1UK3,1UK4,1UW7,1WOF,1Z1I,2A5A,2A5I,2A5K,2ACF,2AHM,2ALV,2AMD,2AMQ,2BX3,2BX4,2C3S,2D2D,2DUC,2FAV,2FE8,2FYG,2G9T,2GA6,2GDT,2GRI,2GT7,2GT8,2GTB,2GX4,2GZ7,2GZ8,2GZ9,2H2Z,2HOB,2HSX,2IDY,2JZF,2K7X,2K87,2KAF,2LIZ,2OP9,2OZK,2RNK,2V6N,2VJ1,2XYQ,2XYR,2XYV,2Z3C,2Z3D,2Z3E,2Z94,2Z9G,2Z9J,2Z9K,2Z9L,2ZU4,2ZU5,3D62,3E91,3E9S,3EA7,3EA8,3EBN,3IWM,3M3V,3MJ5,3R24,3SN8,3SNA,3SNB,3SNC,3SND,3SNE,3SZN…	Replicase polyprotein 1ab	R1AB_CVHSA	P0C6X7	P59641,Q6WGN0,Q7T697,Q808C0,Q80BV7,Q80BV8,Q80E51
50499687	OC(=O)c1ccccc1-c1ccc(\C=C2/C(=O)N(N=C2c2ccccc2)c2ccccc2)o1	InChI=1S/C27H18N2O4/c30-26-23(17-20-15-16-24(33-20)21-13-7-8-14-22(21)27(31)32)25(18-9-3-1-4-10-18)28-29(26)19-11-5-2-6-12-19/h1-17H,(H,31,32)/b23-17-	FPDHFAJPJUEJDC-QJOMJCCJSA-N	50176814	CHEMBL3810361	3C-like proteinase (3CL-PRO)	Human SARS coronavirus		41200							ChEMBL	10.1016/j.bmc.2016.05.013	27240464			Kumar, V; Tan, KP; Wang, YM; Lin, SW; Liang, PH	Academia Sinica	http://www.bindingdb.org/bind/chemsearch/marvin/MolStructure.jsp?monomerid=50176814	http://www.bindingdb.org/jsp/dbsearch/PrimarySearch_ki.jsp?energyterm=kJ/mole&tag=pol&polymerid=4753&target=3C-like+proteinase+%283CL-PRO%29&column=ki&startPg=0&Increment=50&submit=Search	http://www.bindingdb.org/jsp/dbsearch/PrimarySearch_ki.jsp?energyterm=kJ/mole&tag=r21&monomerid=50176814&enzyme=3C-like+proteinase+%283CL-PRO%29&column=ki&startPg=0&Increment=50&submit=Search			127043645	346549142		CHEMBL3810361					1	MESLVLGVNEKTHVQLSLPVLQVRDVLVRGFGDSVEEALSEAREHLKNGTCGLVELEKGVLPQLEQPYVFIKRSDALSTNHGHKVVELVAEMDGIQYGRSGITLGVLVPHVGETPIAYRNVLLRKNGNKGAGGHSYGIDLKSYDLGDELGTDPIEDYEQNWNTKHGSGALRELTRELNGGAVTRYVDNNFCGPDGYPLDCIKDFLARAGKSMCTLSEQLDYIESKRGVYCCRDHEHEIAWFTERSDKSYEHQTPFEIKSAKKFDTFKGECPKFVFPLNSKVKVIQPRVEKKKTEGFMGRIRSVYPVASPQECNNMHLSTLMKCNHCDEVSWQTCDFLKATCEHCGTENLVIEGPTTCGYLPTNAVVKMPCPACQDPEIGPEHSVADYHNHSNIETRLRK…	1Q2W,1QZ8,1UJ1,1UK2,1UK3,1UK4,1UW7,1WOF,1Z1I,2A5A,2A5I,2A5K,2ACF,2AHM,2ALV,2AMD,2AMQ,2BX3,2BX4,2C3S,2D2D,2DUC,2FAV,2FE8,2FYG,2G9T,2GA6,2GDT,2GRI,2GT7,2GT8,2GTB,2GX4,2GZ7,2GZ8,2GZ9,2H2Z,2HOB,2HSX,2IDY,2JZF,2K7X,2K87,2KAF,2LIZ,2OP9,2OZK,2RNK,2V6N,2VJ1,2XYQ,2XYR,2XYV,2Z3C,2Z3D,2Z3E,2Z94,2Z9G,2Z9J,2Z9K,2Z9L,2ZU4,2ZU5,3D62,3E91,3E9S,3EA7,3EA8,3EBN,3IWM,3M3V,3MJ5,3R24,3SN8,3SNA,3SNB,3SNC,3SND,3SNE,3SZN…	Replicase polyprotein 1ab	R1AB_CVHSA	P0C6X7	P59641,Q6WGN0,Q7T697,Q808C0,Q80BV7,Q80BV8,Q80E51
50499688	OC(=O)c1ccccc1-c1ccc(\C=C2/C(=O)N(N=C2c2ccccc2)c2ccc(F)cc2)o1	InChI=1S/C27H17FN2O4/c28-18-10-12-19(13-11-18)30-26(31)23(25(29-30)17-6-2-1-3-7-17)16-20-14-15-24(34-20)21-8-4-5-9-22(21)27(32)33/h1-16H,(H,32,33)/b23-16-	XKQCHIXXQNMHLJ-KQWNVCNZSA-N	50176856	CHEMBL3810325	3C-like proteinase (3CL-PRO)	Human SARS coronavirus		37500							ChEMBL	10.1016/j.bmc.2016.05.013	27240464			Kumar, V; Tan, KP; Wang, YM; Lin, SW; Liang, PH	Academia Sinica	http://www.bindingdb.org/bind/chemsearch/marvin/MolStructure.jsp?monomerid=50176856	http://www.bindingdb.org/jsp/dbsearch/PrimarySearch_ki.jsp?energyterm=kJ/mole&tag=pol&polymerid=4753&target=3C-like+proteinase+%283CL-PRO%29&column=ki&startPg=0&Increment=50&submit=Search	http://www.bindingdb.org/jsp/dbsearch/PrimarySearch_ki.jsp?energyterm=kJ/mole&tag=r21&monomerid=50176856&enzyme=3C-like+proteinase+%283CL-PRO%29&column=ki&startPg=0&Increment=50&submit=Search			102341659	346549143		CHEMBL3810325					1	MESLVLGVNEKTHVQLSLPVLQVRDVLVRGFGDSVEEALSEAREHLKNGTCGLVELEKGVLPQLEQPYVFIKRSDALSTNHGHKVVELVAEMDGIQYGRSGITLGVLVPHVGETPIAYRNVLLRKNGNKGAGGHSYGIDLKSYDLGDELGTDPIEDYEQNWNTKHGSGALRELTRELNGGAVTRYVDNNFCGPDGYPLDCIKDFLARAGKSMCTLSEQLDYIESKRGVYCCRDHEHEIAWFTERSDKSYEHQTPFEIKSAKKFDTFKGECPKFVFPLNSKVKVIQPRVEKKKTEGFMGRIRSVYPVASPQECNNMHLSTLMKCNHCDEVSWQTCDFLKATCEHCGTENLVIEGPTTCGYLPTNAVVKMPCPACQDPEIGPEHSVADYHNHSNIETRLRK…	1Q2W,1QZ8,1UJ1,1UK2,1UK3,1UK4,1UW7,1WOF,1Z1I,2A5A,2A5I,2A5K,2ACF,2AHM,2ALV,2AMD,2AMQ,2BX3,2BX4,2C3S,2D2D,2DUC,2FAV,2FE8,2FYG,2G9T,2GA6,2GDT,2GRI,2GT7,2GT8,2GTB,2GX4,2GZ7,2GZ8,2GZ9,2H2Z,2HOB,2HSX,2IDY,2JZF,2K7X,2K87,2KAF,2LIZ,2OP9,2OZK,2RNK,2V6N,2VJ1,2XYQ,2XYR,2XYV,2Z3C,2Z3D,2Z3E,2Z94,2Z9G,2Z9J,2Z9K,2Z9L,2ZU4,2ZU5,3D62,3E91,3E9S,3EA7,3EA8,3EBN,3IWM,3M3V,3MJ5,3R24,3SN8,3SNA,3SNB,3SNC,3SND,3SNE,3SZN…	Replicase polyprotein 1ab	R1AB_CVHSA	P0C6X7	P59641,Q6WGN0,Q7T697,Q808C0,Q80BV7,Q80BV8,Q80E51
50499689	CC(C)c1ccc(cc1)N1N=C(\C(=C\c2ccc(o2)-c2ccccc2C(O)=O)C1=O)c1ccccc1	InChI=1S/C30H24N2O4/c1-19(2)20-12-14-22(15-13-20)32-29(33)26(28(31-32)21-8-4-3-5-9-21)18-23-16-17-27(36-23)24-10-6-7-11-25(24)30(34)35/h3-19H,1-2H3,(H,34,35)/b26-18-	IZZUJMWOAXHUTE-ITYLOYPMSA-N	50176857	CHEMBL3809506	3C-like proteinase (3CL-PRO)	Human SARS coronavirus		11700							ChEMBL	10.1016/j.bmc.2016.05.013	27240464			Kumar, V; Tan, KP; Wang, YM; Lin, SW; Liang, PH	Academia Sinica	http://www.bindingdb.org/bind/chemsearch/marvin/MolStructure.jsp?monomerid=50176857	http://www.bindingdb.org/jsp/dbsearch/PrimarySearch_ki.jsp?energyterm=kJ/mole&tag=pol&polymerid=4753&target=3C-like+proteinase+%283CL-PRO%29&column=ki&startPg=0&Increment=50&submit=Search	http://www.bindingdb.org/jsp/dbsearch/PrimarySearch_ki.jsp?energyterm=kJ/mole&tag=r21&monomerid=50176857&enzyme=3C-like+proteinase+%283CL-PRO%29&column=ki&startPg=0&Increment=50&submit=Search			127045220	346549144		CHEMBL3809506					1	MESLVLGVNEKTHVQLSLPVLQVRDVLVRGFGDSVEEALSEAREHLKNGTCGLVELEKGVLPQLEQPYVFIKRSDALSTNHGHKVVELVAEMDGIQYGRSGITLGVLVPHVGETPIAYRNVLLRKNGNKGAGGHSYGIDLKSYDLGDELGTDPIEDYEQNWNTKHGSGALRELTRELNGGAVTRYVDNNFCGPDGYPLDCIKDFLARAGKSMCTLSEQLDYIESKRGVYCCRDHEHEIAWFTERSDKSYEHQTPFEIKSAKKFDTFKGECPKFVFPLNSKVKVIQPRVEKKKTEGFMGRIRSVYPVASPQECNNMHLSTLMKCNHCDEVSWQTCDFLKATCEHCGTENLVIEGPTTCGYLPTNAVVKMPCPACQDPEIGPEHSVADYHNHSNIETRLRK…	1Q2W,1QZ8,1UJ1,1UK2,1UK3,1UK4,1UW7,1WOF,1Z1I,2A5A,2A5I,2A5K,2ACF,2AHM,2ALV,2AMD,2AMQ,2BX3,2BX4,2C3S,2D2D,2DUC,2FAV,2FE8,2FYG,2G9T,2GA6,2GDT,2GRI,2GT7,2GT8,2GTB,2GX4,2GZ7,2GZ8,2GZ9,2H2Z,2HOB,2HSX,2IDY,2JZF,2K7X,2K87,2KAF,2LIZ,2OP9,2OZK,2RNK,2V6N,2VJ1,2XYQ,2XYR,2XYV,2Z3C,2Z3D,2Z3E,2Z94,2Z9G,2Z9J,2Z9K,2Z9L,2ZU4,2ZU5,3D62,3E91,3E9S,3EA7,3EA8,3EBN,3IWM,3M3V,3MJ5,3R24,3SN8,3SNA,3SNB,3SNC,3SND,3SNE,3SZN…	Replicase polyprotein 1ab	R1AB_CVHSA	P0C6X7	P59641,Q6WGN0,Q7T697,Q808C0,Q80BV7,Q80BV8,Q80E51
50499690	CC(C)(C)c1ccc(cc1)N1N=C(\C(=C\c2ccc(o2)-c2ccccc2C(O)=O)C1=O)c1ccccc1	InChI=1S/C31H26N2O4/c1-31(2,3)21-13-15-22(16-14-21)33-29(34)26(28(32-33)20-9-5-4-6-10-20)19-23-17-18-27(37-23)24-11-7-8-12-25(24)30(35)36/h4-19H,1-3H3,(H,35,36)/b26-19-	XWFZHLYIOFAQRH-XHPQRKPJSA-N	50176858	CHEMBL3809579	3C-like proteinase (3CL-PRO)	Human SARS coronavirus		8600							ChEMBL	10.1016/j.bmc.2016.05.013	27240464			Kumar, V; Tan, KP; Wang, YM; Lin, SW; Liang, PH	Academia Sinica	http://www.bindingdb.org/bind/chemsearch/marvin/MolStructure.jsp?monomerid=50176858	http://www.bindingdb.org/jsp/dbsearch/PrimarySearch_ki.jsp?energyterm=kJ/mole&tag=pol&polymerid=4753&target=3C-like+proteinase+%283CL-PRO%29&column=ki&startPg=0&Increment=50&submit=Search	http://www.bindingdb.org/jsp/dbsearch/PrimarySearch_ki.jsp?energyterm=kJ/mole&tag=r21&monomerid=50176858&enzyme=3C-like+proteinase+%283CL-PRO%29&column=ki&startPg=0&Increment=50&submit=Search			127045221	346549145		CHEMBL3809579					1	MESLVLGVNEKTHVQLSLPVLQVRDVLVRGFGDSVEEALSEAREHLKNGTCGLVELEKGVLPQLEQPYVFIKRSDALSTNHGHKVVELVAEMDGIQYGRSGITLGVLVPHVGETPIAYRNVLLRKNGNKGAGGHSYGIDLKSYDLGDELGTDPIEDYEQNWNTKHGSGALRELTRELNGGAVTRYVDNNFCGPDGYPLDCIKDFLARAGKSMCTLSEQLDYIESKRGVYCCRDHEHEIAWFTERSDKSYEHQTPFEIKSAKKFDTFKGECPKFVFPLNSKVKVIQPRVEKKKTEGFMGRIRSVYPVASPQECNNMHLSTLMKCNHCDEVSWQTCDFLKATCEHCGTENLVIEGPTTCGYLPTNAVVKMPCPACQDPEIGPEHSVADYHNHSNIETRLRK…	1Q2W,1QZ8,1UJ1,1UK2,1UK3,1UK4,1UW7,1WOF,1Z1I,2A5A,2A5I,2A5K,2ACF,2AHM,2ALV,2AMD,2AMQ,2BX3,2BX4,2C3S,2D2D,2DUC,2FAV,2FE8,2FYG,2G9T,2GA6,2GDT,2GRI,2GT7,2GT8,2GTB,2GX4,2GZ7,2GZ8,2GZ9,2H2Z,2HOB,2HSX,2IDY,2JZF,2K7X,2K87,2KAF,2LIZ,2OP9,2OZK,2RNK,2V6N,2VJ1,2XYQ,2XYR,2XYV,2Z3C,2Z3D,2Z3E,2Z94,2Z9G,2Z9J,2Z9K,2Z9L,2ZU4,2ZU5,3D62,3E91,3E9S,3EA7,3EA8,3EBN,3IWM,3M3V,3MJ5,3R24,3SN8,3SNA,3SNB,3SNC,3SND,3SNE,3SZN…	Replicase polyprotein 1ab	R1AB_CVHSA	P0C6X7	P59641,Q6WGN0,Q7T697,Q808C0,Q80BV7,Q80BV8,Q80E51
50499691	OC(=O)c1ccccc1-c1ccc(\C=C2/C(=O)N(N=C2c2ccccc2)c2ccc(cc2)C#N)o1	InChI=1S/C28H17N3O4/c29-17-18-10-12-20(13-11-18)31-27(32)24(26(30-31)19-6-2-1-3-7-19)16-21-14-15-25(35-21)22-8-4-5-9-23(22)28(33)34/h1-16H,(H,33,34)/b24-16-	FZYKSLVCMHDYQR-JLPGSUDCSA-N	50176859	CHEMBL3809498	3C-like proteinase (3CL-PRO)	Human SARS coronavirus		18700							ChEMBL	10.1016/j.bmc.2016.05.013	27240464			Kumar, V; Tan, KP; Wang, YM; Lin, SW; Liang, PH	Academia Sinica	http://www.bindingdb.org/bind/chemsearch/marvin/MolStructure.jsp?monomerid=50176859	http://www.bindingdb.org/jsp/dbsearch/PrimarySearch_ki.jsp?energyterm=kJ/mole&tag=pol&polymerid=4753&target=3C-like+proteinase+%283CL-PRO%29&column=ki&startPg=0&Increment=50&submit=Search	http://www.bindingdb.org/jsp/dbsearch/PrimarySearch_ki.jsp?energyterm=kJ/mole&tag=r21&monomerid=50176859&enzyme=3C-like+proteinase+%283CL-PRO%29&column=ki&startPg=0&Increment=50&submit=Search			127045222	346549146		CHEMBL3809498					1	MESLVLGVNEKTHVQLSLPVLQVRDVLVRGFGDSVEEALSEAREHLKNGTCGLVELEKGVLPQLEQPYVFIKRSDALSTNHGHKVVELVAEMDGIQYGRSGITLGVLVPHVGETPIAYRNVLLRKNGNKGAGGHSYGIDLKSYDLGDELGTDPIEDYEQNWNTKHGSGALRELTRELNGGAVTRYVDNNFCGPDGYPLDCIKDFLARAGKSMCTLSEQLDYIESKRGVYCCRDHEHEIAWFTERSDKSYEHQTPFEIKSAKKFDTFKGECPKFVFPLNSKVKVIQPRVEKKKTEGFMGRIRSVYPVASPQECNNMHLSTLMKCNHCDEVSWQTCDFLKATCEHCGTENLVIEGPTTCGYLPTNAVVKMPCPACQDPEIGPEHSVADYHNHSNIETRLRK…	1Q2W,1QZ8,1UJ1,1UK2,1UK3,1UK4,1UW7,1WOF,1Z1I,2A5A,2A5I,2A5K,2ACF,2AHM,2ALV,2AMD,2AMQ,2BX3,2BX4,2C3S,2D2D,2DUC,2FAV,2FE8,2FYG,2G9T,2GA6,2GDT,2GRI,2GT7,2GT8,2GTB,2GX4,2GZ7,2GZ8,2GZ9,2H2Z,2HOB,2HSX,2IDY,2JZF,2K7X,2K87,2KAF,2LIZ,2OP9,2OZK,2RNK,2V6N,2VJ1,2XYQ,2XYR,2XYV,2Z3C,2Z3D,2Z3E,2Z94,2Z9G,2Z9J,2Z9K,2Z9L,2ZU4,2ZU5,3D62,3E91,3E9S,3EA7,3EA8,3EBN,3IWM,3M3V,3MJ5,3R24,3SN8,3SNA,3SNB,3SNC,3SND,3SNE,3SZN…	Replicase polyprotein 1ab	R1AB_CVHSA	P0C6X7	P59641,Q6WGN0,Q7T697,Q808C0,Q80BV7,Q80BV8,Q80E51
50499692	COc1ccc(cc1)N1N=C(\C(=C\c2ccc(o2)-c2ccccc2C(O)=O)C1=O)c1ccccc1	InChI=1S/C28H20N2O5/c1-34-20-13-11-19(12-14-20)30-27(31)24(26(29-30)18-7-3-2-4-8-18)17-21-15-16-25(35-21)22-9-5-6-10-23(22)28(32)33/h2-17H,1H3,(H,32,33)/b24-17-	SKEVDQNJWPPYIJ-ULJHMMPZSA-N	50176860	CHEMBL3809059	3C-like proteinase (3CL-PRO)	Human SARS coronavirus		30700							ChEMBL	10.1016/j.bmc.2016.05.013	27240464			Kumar, V; Tan, KP; Wang, YM; Lin, SW; Liang, PH	Academia Sinica	http://www.bindingdb.org/bind/chemsearch/marvin/MolStructure.jsp?monomerid=50176860	http://www.bindingdb.org/jsp/dbsearch/PrimarySearch_ki.jsp?energyterm=kJ/mole&tag=pol&polymerid=4753&target=3C-like+proteinase+%283CL-PRO%29&column=ki&startPg=0&Increment=50&submit=Search	http://www.bindingdb.org/jsp/dbsearch/PrimarySearch_ki.jsp?energyterm=kJ/mole&tag=r21&monomerid=50176860&enzyme=3C-like+proteinase+%283CL-PRO%29&column=ki&startPg=0&Increment=50&submit=Search			127045227	346549147		CHEMBL3809059					1	MESLVLGVNEKTHVQLSLPVLQVRDVLVRGFGDSVEEALSEAREHLKNGTCGLVELEKGVLPQLEQPYVFIKRSDALSTNHGHKVVELVAEMDGIQYGRSGITLGVLVPHVGETPIAYRNVLLRKNGNKGAGGHSYGIDLKSYDLGDELGTDPIEDYEQNWNTKHGSGALRELTRELNGGAVTRYVDNNFCGPDGYPLDCIKDFLARAGKSMCTLSEQLDYIESKRGVYCCRDHEHEIAWFTERSDKSYEHQTPFEIKSAKKFDTFKGECPKFVFPLNSKVKVIQPRVEKKKTEGFMGRIRSVYPVASPQECNNMHLSTLMKCNHCDEVSWQTCDFLKATCEHCGTENLVIEGPTTCGYLPTNAVVKMPCPACQDPEIGPEHSVADYHNHSNIETRLRK…	1Q2W,1QZ8,1UJ1,1UK2,1UK3,1UK4,1UW7,1WOF,1Z1I,2A5A,2A5I,2A5K,2ACF,2AHM,2ALV,2AMD,2AMQ,2BX3,2BX4,2C3S,2D2D,2DUC,2FAV,2FE8,2FYG,2G9T,2GA6,2GDT,2GRI,2GT7,2GT8,2GTB,2GX4,2GZ7,2GZ8,2GZ9,2H2Z,2HOB,2HSX,2IDY,2JZF,2K7X,2K87,2KAF,2LIZ,2OP9,2OZK,2RNK,2V6N,2VJ1,2XYQ,2XYR,2XYV,2Z3C,2Z3D,2Z3E,2Z94,2Z9G,2Z9J,2Z9K,2Z9L,2ZU4,2ZU5,3D62,3E91,3E9S,3EA7,3EA8,3EBN,3IWM,3M3V,3MJ5,3R24,3SN8,3SNA,3SNB,3SNC,3SND,3SNE,3SZN…	Replicase polyprotein 1ab	R1AB_CVHSA	P0C6X7	P59641,Q6WGN0,Q7T697,Q808C0,Q80BV7,Q80BV8,Q80E51
50499693	OC(=O)c1cccc(c1)N1N=C(\C(=C\c2ccco2)C1=O)c1ccccc1	InChI=1S/C21H14N2O4/c24-20-18(13-17-10-5-11-27-17)19(14-6-2-1-3-7-14)22-23(20)16-9-4-8-15(12-16)21(25)26/h1-13H,(H,25,26)/b18-13-	HPJRFNJSAWHFEU-AQTBWJFISA-N	50176861	CHEMBL3809833	3C-like proteinase (3CL-PRO)	Human SARS coronavirus		>50000							ChEMBL	10.1016/j.bmc.2016.05.013	27240464			Kumar, V; Tan, KP; Wang, YM; Lin, SW; Liang, PH	Academia Sinica	http://www.bindingdb.org/bind/chemsearch/marvin/MolStructure.jsp?monomerid=50176861	http://www.bindingdb.org/jsp/dbsearch/PrimarySearch_ki.jsp?energyterm=kJ/mole&tag=pol&polymerid=4753&target=3C-like+proteinase+%283CL-PRO%29&column=ki&startPg=0&Increment=50&submit=Search	http://www.bindingdb.org/jsp/dbsearch/PrimarySearch_ki.jsp?energyterm=kJ/mole&tag=r21&monomerid=50176861&enzyme=3C-like+proteinase+%283CL-PRO%29&column=ki&startPg=0&Increment=50&submit=Search			127045228	346549148		CHEMBL3809833					1	MESLVLGVNEKTHVQLSLPVLQVRDVLVRGFGDSVEEALSEAREHLKNGTCGLVELEKGVLPQLEQPYVFIKRSDALSTNHGHKVVELVAEMDGIQYGRSGITLGVLVPHVGETPIAYRNVLLRKNGNKGAGGHSYGIDLKSYDLGDELGTDPIEDYEQNWNTKHGSGALRELTRELNGGAVTRYVDNNFCGPDGYPLDCIKDFLARAGKSMCTLSEQLDYIESKRGVYCCRDHEHEIAWFTERSDKSYEHQTPFEIKSAKKFDTFKGECPKFVFPLNSKVKVIQPRVEKKKTEGFMGRIRSVYPVASPQECNNMHLSTLMKCNHCDEVSWQTCDFLKATCEHCGTENLVIEGPTTCGYLPTNAVVKMPCPACQDPEIGPEHSVADYHNHSNIETRLRK…	1Q2W,1QZ8,1UJ1,1UK2,1UK3,1UK4,1UW7,1WOF,1Z1I,2A5A,2A5I,2A5K,2ACF,2AHM,2ALV,2AMD,2AMQ,2BX3,2BX4,2C3S,2D2D,2DUC,2FAV,2FE8,2FYG,2G9T,2GA6,2GDT,2GRI,2GT7,2GT8,2GTB,2GX4,2GZ7,2GZ8,2GZ9,2H2Z,2HOB,2HSX,2IDY,2JZF,2K7X,2K87,2KAF,2LIZ,2OP9,2OZK,2RNK,2V6N,2VJ1,2XYQ,2XYR,2XYV,2Z3C,2Z3D,2Z3E,2Z94,2Z9G,2Z9J,2Z9K,2Z9L,2ZU4,2ZU5,3D62,3E91,3E9S,3EA7,3EA8,3EBN,3IWM,3M3V,3MJ5,3R24,3SN8,3SNA,3SNB,3SNC,3SND,3SNE,3SZN…	Replicase polyprotein 1ab	R1AB_CVHSA	P0C6X7	P59641,Q6WGN0,Q7T697,Q808C0,Q80BV7,Q80BV8,Q80E51
50499694	OC(=O)c1cccc(c1)N1N=C(\C(=C\c2ccc(cc2)-c2ccccc2)C1=O)c1ccccc1	InChI=1S/C29H20N2O3/c32-28-26(18-20-14-16-22(17-15-20)21-8-3-1-4-9-21)27(23-10-5-2-6-11-23)30-31(28)25-13-7-12-24(19-25)29(33)34/h1-19H,(H,33,34)/b26-18-	BWJHOHOWSONGSI-ITYLOYPMSA-N	50176862	CHEMBL3809053	3C-like proteinase (3CL-PRO)	Human SARS coronavirus		6700							ChEMBL	10.1016/j.bmc.2016.05.013	27240464			Kumar, V; Tan, KP; Wang, YM; Lin, SW; Liang, PH	Academia Sinica	http://www.bindingdb.org/bind/chemsearch/marvin/MolStructure.jsp?monomerid=50176862	http://www.bindingdb.org/jsp/dbsearch/PrimarySearch_ki.jsp?energyterm=kJ/mole&tag=pol&polymerid=4753&target=3C-like+proteinase+%283CL-PRO%29&column=ki&startPg=0&Increment=50&submit=Search	http://www.bindingdb.org/jsp/dbsearch/PrimarySearch_ki.jsp?energyterm=kJ/mole&tag=r21&monomerid=50176862&enzyme=3C-like+proteinase+%283CL-PRO%29&column=ki&startPg=0&Increment=50&submit=Search			127045229	346549149		CHEMBL3809053					1	MESLVLGVNEKTHVQLSLPVLQVRDVLVRGFGDSVEEALSEAREHLKNGTCGLVELEKGVLPQLEQPYVFIKRSDALSTNHGHKVVELVAEMDGIQYGRSGITLGVLVPHVGETPIAYRNVLLRKNGNKGAGGHSYGIDLKSYDLGDELGTDPIEDYEQNWNTKHGSGALRELTRELNGGAVTRYVDNNFCGPDGYPLDCIKDFLARAGKSMCTLSEQLDYIESKRGVYCCRDHEHEIAWFTERSDKSYEHQTPFEIKSAKKFDTFKGECPKFVFPLNSKVKVIQPRVEKKKTEGFMGRIRSVYPVASPQECNNMHLSTLMKCNHCDEVSWQTCDFLKATCEHCGTENLVIEGPTTCGYLPTNAVVKMPCPACQDPEIGPEHSVADYHNHSNIETRLRK…	1Q2W,1QZ8,1UJ1,1UK2,1UK3,1UK4,1UW7,1WOF,1Z1I,2A5A,2A5I,2A5K,2ACF,2AHM,2ALV,2AMD,2AMQ,2BX3,2BX4,2C3S,2D2D,2DUC,2FAV,2FE8,2FYG,2G9T,2GA6,2GDT,2GRI,2GT7,2GT8,2GTB,2GX4,2GZ7,2GZ8,2GZ9,2H2Z,2HOB,2HSX,2IDY,2JZF,2K7X,2K87,2KAF,2LIZ,2OP9,2OZK,2RNK,2V6N,2VJ1,2XYQ,2XYR,2XYV,2Z3C,2Z3D,2Z3E,2Z94,2Z9G,2Z9J,2Z9K,2Z9L,2ZU4,2ZU5,3D62,3E91,3E9S,3EA7,3EA8,3EBN,3IWM,3M3V,3MJ5,3R24,3SN8,3SNA,3SNB,3SNC,3SND,3SNE,3SZN…	Replicase polyprotein 1ab	R1AB_CVHSA	P0C6X7	P59641,Q6WGN0,Q7T697,Q808C0,Q80BV7,Q80BV8,Q80E51
50499695	OC(=O)c1cccc(c1)N1N=C(\C(=C\c2ccc(OCc3ccccc3)cc2)C1=O)c1ccccc1	InChI=1S/C30H22N2O4/c33-29-27(18-21-14-16-26(17-15-21)36-20-22-8-3-1-4-9-22)28(23-10-5-2-6-11-23)31-32(29)25-13-7-12-24(19-25)30(34)35/h1-19H,20H2,(H,34,35)/b27-18-	YTINGXAULBAGRW-IMRQLAEWSA-N	50176863	CHEMBL3809926	3C-like proteinase (3CL-PRO)	Human SARS coronavirus		15700							ChEMBL	10.1016/j.bmc.2016.05.013	27240464			Kumar, V; Tan, KP; Wang, YM; Lin, SW; Liang, PH	Academia Sinica	http://www.bindingdb.org/bind/chemsearch/marvin/MolStructure.jsp?monomerid=50176863	http://www.bindingdb.org/jsp/dbsearch/PrimarySearch_ki.jsp?energyterm=kJ/mole&tag=pol&polymerid=4753&target=3C-like+proteinase+%283CL-PRO%29&column=ki&startPg=0&Increment=50&submit=Search	http://www.bindingdb.org/jsp/dbsearch/PrimarySearch_ki.jsp?energyterm=kJ/mole&tag=r21&monomerid=50176863&enzyme=3C-like+proteinase+%283CL-PRO%29&column=ki&startPg=0&Increment=50&submit=Search			127045386	346549150		CHEMBL3809926					1	MESLVLGVNEKTHVQLSLPVLQVRDVLVRGFGDSVEEALSEAREHLKNGTCGLVELEKGVLPQLEQPYVFIKRSDALSTNHGHKVVELVAEMDGIQYGRSGITLGVLVPHVGETPIAYRNVLLRKNGNKGAGGHSYGIDLKSYDLGDELGTDPIEDYEQNWNTKHGSGALRELTRELNGGAVTRYVDNNFCGPDGYPLDCIKDFLARAGKSMCTLSEQLDYIESKRGVYCCRDHEHEIAWFTERSDKSYEHQTPFEIKSAKKFDTFKGECPKFVFPLNSKVKVIQPRVEKKKTEGFMGRIRSVYPVASPQECNNMHLSTLMKCNHCDEVSWQTCDFLKATCEHCGTENLVIEGPTTCGYLPTNAVVKMPCPACQDPEIGPEHSVADYHNHSNIETRLRK…	1Q2W,1QZ8,1UJ1,1UK2,1UK3,1UK4,1UW7,1WOF,1Z1I,2A5A,2A5I,2A5K,2ACF,2AHM,2ALV,2AMD,2AMQ,2BX3,2BX4,2C3S,2D2D,2DUC,2FAV,2FE8,2FYG,2G9T,2GA6,2GDT,2GRI,2GT7,2GT8,2GTB,2GX4,2GZ7,2GZ8,2GZ9,2H2Z,2HOB,2HSX,2IDY,2JZF,2K7X,2K87,2KAF,2LIZ,2OP9,2OZK,2RNK,2V6N,2VJ1,2XYQ,2XYR,2XYV,2Z3C,2Z3D,2Z3E,2Z94,2Z9G,2Z9J,2Z9K,2Z9L,2ZU4,2ZU5,3D62,3E91,3E9S,3EA7,3EA8,3EBN,3IWM,3M3V,3MJ5,3R24,3SN8,3SNA,3SNB,3SNC,3SND,3SNE,3SZN…	Replicase polyprotein 1ab	R1AB_CVHSA	P0C6X7	P59641,Q6WGN0,Q7T697,Q808C0,Q80BV7,Q80BV8,Q80E51
62993	OCCNc1ccc2C(=O)N(C(=O)c3cccc1c23)c1cccc(Br)c1	InChI=1S/C20H15BrN2O3/c21-12-3-1-4-13(11-12)23-19(25)15-6-2-5-14-17(22-9-10-24)8-7-16(18(14)15)20(23)26/h1-8,11,22,24H,9-10H2	JZCUVYNOSDWORZ-UHFFFAOYSA-N	35553	1H-benzo[de]isoquinoline-1,3(2H)-dione, 1	Genome polyprotein	Hepatitis C virus		64							Curated from the literature by BindingDB	10.1021/jm900517t	19877603			Ontoria, JM; Rydberg, EH; Di Marco, S; Tomei, L; Attenni, B; Malancona, S; Martin Hernando, JI; Gennari, N; Koch, U; Narjes, F; Rowley, M; Summa, V; Carroll, SS; Olsen, DB; De Francesco, R; Altamura, S; Migliaccio, G; Carfi, A	IRBM-MRL Rome	http://www.bindingdb.org/bind/chemsearch/marvin/MolStructure.jsp?monomerid=35553	http://www.bindingdb.org/jsp/dbsearch/PrimarySearch_ki.jsp?energyterm=kJ/mole&tag=pol&polymerid=5492&target=Genome+polyprotein&column=ki&startPg=0&Increment=50&submit=Search	http://www.bindingdb.org/jsp/dbsearch/PrimarySearch_ki.jsp?energyterm=kJ/mole&tag=r21&monomerid=35553&enzyme=Genome+polyprotein&column=ki&startPg=0&Increment=50&submit=Search	VGI	3HVO,2WHO	4177750	85856347			DB08701			ZINC03087488	1	MSTNPKPQKKNKRNTNRRPQDVKFPGGGQIVGGVYLLPRRGPRLGVRATRKTSERSQPRGRRQPIPKARRPEGRTWAQPGYPWPLYGNEGCGWAGWLLSPRGSRPSWGPTDPRRRSRNLGKVIDTLTCGFADLMGYIPLVGAPLGGAARALAHGVRVLEDGVNYATGNLPGCSFSIFLLALLSCLTVPASAYQVRNSTGLYHVTNDCPNSSIVYEAADAILHTPGCVPCVREGNASRCWVAMTPTVATRDGKLPATQLRRHIDLLVGSATLCSALYVGDLCGSVFLVGQLFTFSPRRHWTTQGCNCSIYPGHITGHRMAWDMMMNWSPTTALVMAQLLRIPQAILDMIAGAHWGVLAGIAYFSMVGNWAKVLVVLLLFAGVDAETHVTGGSAGHTVSGF…	1DXW,1JXP,1NHU,1NHV,1QUV,2D3U,2D3Z,2D41,2GC8,2HWH,2HWI,2I1R,2IJN,2JC0,2JC1,2K1Q,2O5D,2QE2,2QE5,2XHV,2ZKU,3BR9,3BSA,3BSC,3CDE,3CO9,3CVK,3CWJ,3D28,3D5M,3E51,3GYN,3H2L,3IGV,3PHE,3Q0Z,3QGD,3QGE,3QGF,3QGG,3UDL,3VQS,4EO6,4EO8,4NLD,4RY4,4RY5,4RY6,4RY7,5PZK,5PZL,5PZM,5PZN,5PZP,5TRH,5TRI,5TRJ,5TRK,5TWN,6FE6	Genome polyprotein	POLG_HCV1	P26664	Q9IFE5
217965	CNC(=O)c1c(oc2ccc(c(F)c12)-c1cc(ccc1C)C(=O)NC1(COC1)c1ccccc1)-c1ccc(F)cc1	InChI=1S/C33H26F2N2O4/c1-19-8-9-21(31(38)37-33(17-40-18-33)22-6-4-3-5-7-22)16-25(19)24-14-15-26-27(29(24)35)28(32(39)36-2)30(41-26)20-10-12-23(34)13-11-20/h3-16H,17-18H2,1-2H3,(H,36,39)(H,37,38)	CJLPUEJLEFQJFM-UHFFFAOYSA-N	100755	US8507683, 6	Hepatitis C virus NS5B RNA-dependent RNA polymerase	Hepatitis C virus		57							US Patent				US8507683	Yeung, K; Kadow, JF; Bora, RO; Selvakumar, K	Bristol-Myers Squibb Company	http://www.bindingdb.org/bind/chemsearch/marvin/MolStructure.jsp?monomerid=100755	http://www.bindingdb.org/jsp/dbsearch/PrimarySearch_ki.jsp?energyterm=kJ/mole&tag=pol&polymerid=5565&target=Hepatitis+C+virus+NS5B+RNA-dependent+RNA+polymerase&column=ki&startPg=0&Increment=50&submit=Search	http://www.bindingdb.org/jsp/dbsearch/PrimarySearch_ki.jsp?energyterm=kJ/mole&tag=r21&monomerid=100755&enzyme=Hepatitis+C+virus+NS5B+RNA-dependent+RNA+polymerase&column=ki&startPg=0&Increment=50&submit=Search			67965473	165223216						ZINC96170420	1	RTEEAIYQCCDLDPQARVAIRSLTERLYVGGPLTNSRGENCGYRRRASGVLTTSCGNTLTCYIKAQAACRAAGRQDCTMLVCGDDLVVICESAGVQEDAASLRAFTEAMTRYSAPPGDPPQPEYDLELITSCSSNVSVAHDGAGKRVYYLTRDPTTPLARAAWETARHTPVNSWLGNIIMFAPTLWVRMIMLTHFFSVLIARDQLEQALDCEIYGACYSIEPLLPPIIQ									Q8JXU8
217966	CNC(=O)c1c(oc2ccc(c(F)c12)-c1cc(ccc1C)C(=O)NC1(COC1)c1ccccn1)-c1ccc(F)cc1	InChI=1S/C32H25F2N3O4/c1-18-6-7-20(30(38)37-32(16-40-17-32)25-5-3-4-14-36-25)15-23(18)22-12-13-24-26(28(22)34)27(31(39)35-2)29(41-24)19-8-10-21(33)11-9-19/h3-15H,16-17H2,1-2H3,(H,35,39)(H,37,38)	JAPPEDZLONAMIS-UHFFFAOYSA-N	100756	US8507683, 7	Hepatitis C virus NS5B RNA-dependent RNA polymerase	Hepatitis C virus		24							US Patent				US8507683	Yeung, K; Kadow, JF; Bora, RO; Selvakumar, K	Bristol-Myers Squibb Company	http://www.bindingdb.org/bind/chemsearch/marvin/MolStructure.jsp?monomerid=100756	http://www.bindingdb.org/jsp/dbsearch/PrimarySearch_ki.jsp?energyterm=kJ/mole&tag=pol&polymerid=5565&target=Hepatitis+C+virus+NS5B+RNA-dependent+RNA+polymerase&column=ki&startPg=0&Increment=50&submit=Search	http://www.bindingdb.org/jsp/dbsearch/PrimarySearch_ki.jsp?energyterm=kJ/mole&tag=r21&monomerid=100756&enzyme=Hepatitis+C+virus+NS5B+RNA-dependent+RNA+polymerase&column=ki&startPg=0&Increment=50&submit=Search			57381862	165223217						ZINC96170421	1	RTEEAIYQCCDLDPQARVAIRSLTERLYVGGPLTNSRGENCGYRRRASGVLTTSCGNTLTCYIKAQAACRAAGRQDCTMLVCGDDLVVICESAGVQEDAASLRAFTEAMTRYSAPPGDPPQPEYDLELITSCSSNVSVAHDGAGKRVYYLTRDPTTPLARAAWETARHTPVNSWLGNIIMFAPTLWVRMIMLTHFFSVLIARDQLEQALDCEIYGACYSIEPLLPPIIQ									Q8JXU8
217967	CNC(=O)c1c(oc2ccc(c(F)c12)-c1cc(C(=O)NC2(COC2)c2ccccn2)c(OC)cc1C)-c1ccc(F)cc1	InChI=1S/C33H27F2N3O5/c1-18-14-25(41-3)23(31(39)38-33(16-42-17-33)26-6-4-5-13-37-26)15-22(18)21-11-12-24-27(29(21)35)28(32(40)36-2)30(43-24)19-7-9-20(34)10-8-19/h4-15H,16-17H2,1-3H3,(H,36,40)(H,38,39)	DZSRQYLJHHKCLB-UHFFFAOYSA-N	100757	US8507683, 8	Hepatitis C virus NS5B RNA-dependent RNA polymerase	Hepatitis C virus		17							US Patent				US8507683	Yeung, K; Kadow, JF; Bora, RO; Selvakumar, K	Bristol-Myers Squibb Company	http://www.bindingdb.org/bind/chemsearch/marvin/MolStructure.jsp?monomerid=100757	http://www.bindingdb.org/jsp/dbsearch/PrimarySearch_ki.jsp?energyterm=kJ/mole&tag=pol&polymerid=5565&target=Hepatitis+C+virus+NS5B+RNA-dependent+RNA+polymerase&column=ki&startPg=0&Increment=50&submit=Search	http://www.bindingdb.org/jsp/dbsearch/PrimarySearch_ki.jsp?energyterm=kJ/mole&tag=r21&monomerid=100757&enzyme=Hepatitis+C+virus+NS5B+RNA-dependent+RNA+polymerase&column=ki&startPg=0&Increment=50&submit=Search			57381863	165223218						ZINC96170422	1	RTEEAIYQCCDLDPQARVAIRSLTERLYVGGPLTNSRGENCGYRRRASGVLTTSCGNTLTCYIKAQAACRAAGRQDCTMLVCGDDLVVICESAGVQEDAASLRAFTEAMTRYSAPPGDPPQPEYDLELITSCSSNVSVAHDGAGKRVYYLTRDPTTPLARAAWETARHTPVNSWLGNIIMFAPTLWVRMIMLTHFFSVLIARDQLEQALDCEIYGACYSIEPLLPPIIQ									Q8JXU8
217968	CNC(=O)c1c(oc2ccc(c(F)c12)-c1cc(cc(F)c1C)C(=O)NC1(COC1)c1ccccn1)-c1ccc(F)cc1	InChI=1S/C32H24F3N3O4/c1-17-22(13-19(14-23(17)34)30(39)38-32(15-41-16-32)25-5-3-4-12-37-25)21-10-11-24-26(28(21)35)27(31(40)36-2)29(42-24)18-6-8-20(33)9-7-18/h3-14H,15-16H2,1-2H3,(H,36,40)(H,38,39)	LUOJQOPPUKCNGO-UHFFFAOYSA-N	100758	US8507683, 9	Hepatitis C virus NS5B RNA-dependent RNA polymerase	Hepatitis C virus		16							US Patent				US8507683	Yeung, K; Kadow, JF; Bora, RO; Selvakumar, K	Bristol-Myers Squibb Company	http://www.bindingdb.org/bind/chemsearch/marvin/MolStructure.jsp?monomerid=100758	http://www.bindingdb.org/jsp/dbsearch/PrimarySearch_ki.jsp?energyterm=kJ/mole&tag=pol&polymerid=5565&target=Hepatitis+C+virus+NS5B+RNA-dependent+RNA+polymerase&column=ki&startPg=0&Increment=50&submit=Search	http://www.bindingdb.org/jsp/dbsearch/PrimarySearch_ki.jsp?energyterm=kJ/mole&tag=r21&monomerid=100758&enzyme=Hepatitis+C+virus+NS5B+RNA-dependent+RNA+polymerase&column=ki&startPg=0&Increment=50&submit=Search			57336793	165223219						ZINC96170423	1	RTEEAIYQCCDLDPQARVAIRSLTERLYVGGPLTNSRGENCGYRRRASGVLTTSCGNTLTCYIKAQAACRAAGRQDCTMLVCGDDLVVICESAGVQEDAASLRAFTEAMTRYSAPPGDPPQPEYDLELITSCSSNVSVAHDGAGKRVYYLTRDPTTPLARAAWETARHTPVNSWLGNIIMFAPTLWVRMIMLTHFFSVLIARDQLEQALDCEIYGACYSIEPLLPPIIQ									Q8JXU8
217969	CNC(=O)c1c(oc2ccc(c(F)c12)-c1cc(ccc1C)C(=O)NC1(COC1)c1ncccn1)-c1ccc(F)cc1	InChI=1S/C31H24F2N4O4/c1-17-4-5-19(28(38)37-31(15-40-16-31)30-35-12-3-13-36-30)14-22(17)21-10-11-23-24(26(21)33)25(29(39)34-2)27(41-23)18-6-8-20(32)9-7-18/h3-14H,15-16H2,1-2H3,(H,34,39)(H,37,38)	RLOLEIFPKFPFMB-UHFFFAOYSA-N	100759	US8507683, 10	Hepatitis C virus NS5B RNA-dependent RNA polymerase	Hepatitis C virus		10							US Patent				US8507683	Yeung, K; Kadow, JF; Bora, RO; Selvakumar, K	Bristol-Myers Squibb Company	http://www.bindingdb.org/bind/chemsearch/marvin/MolStructure.jsp?monomerid=100759	http://www.bindingdb.org/jsp/dbsearch/PrimarySearch_ki.jsp?energyterm=kJ/mole&tag=pol&polymerid=5565&target=Hepatitis+C+virus+NS5B+RNA-dependent+RNA+polymerase&column=ki&startPg=0&Increment=50&submit=Search	http://www.bindingdb.org/jsp/dbsearch/PrimarySearch_ki.jsp?energyterm=kJ/mole&tag=r21&monomerid=100759&enzyme=Hepatitis+C+virus+NS5B+RNA-dependent+RNA+polymerase&column=ki&startPg=0&Increment=50&submit=Search			67958565	165223220						ZINC96170424	1	RTEEAIYQCCDLDPQARVAIRSLTERLYVGGPLTNSRGENCGYRRRASGVLTTSCGNTLTCYIKAQAACRAAGRQDCTMLVCGDDLVVICESAGVQEDAASLRAFTEAMTRYSAPPGDPPQPEYDLELITSCSSNVSVAHDGAGKRVYYLTRDPTTPLARAAWETARHTPVNSWLGNIIMFAPTLWVRMIMLTHFFSVLIARDQLEQALDCEIYGACYSIEPLLPPIIQ									Q8JXU8
217970	CNC(=O)c1c(oc2ccc(c(F)c12)-c1cc(C(=O)NC2(COC2)c2ncccn2)c(OC)cc1C)-c1ccc(F)cc1	InChI=1S/C32H26F2N4O5/c1-17-13-24(41-3)22(29(39)38-32(15-42-16-32)31-36-11-4-12-37-31)14-21(17)20-9-10-23-25(27(20)34)26(30(40)35-2)28(43-23)18-5-7-19(33)8-6-18/h4-14H,15-16H2,1-3H3,(H,35,40)(H,38,39)	IYUBRZLWHURENF-UHFFFAOYSA-N	100760	US8507683, 11	Hepatitis C virus NS5B RNA-dependent RNA polymerase	Hepatitis C virus		22							US Patent				US8507683	Yeung, K; Kadow, JF; Bora, RO; Selvakumar, K	Bristol-Myers Squibb Company	http://www.bindingdb.org/bind/chemsearch/marvin/MolStructure.jsp?monomerid=100760	http://www.bindingdb.org/jsp/dbsearch/PrimarySearch_ki.jsp?energyterm=kJ/mole&tag=pol&polymerid=5565&target=Hepatitis+C+virus+NS5B+RNA-dependent+RNA+polymerase&column=ki&startPg=0&Increment=50&submit=Search	http://www.bindingdb.org/jsp/dbsearch/PrimarySearch_ki.jsp?energyterm=kJ/mole&tag=r21&monomerid=100760&enzyme=Hepatitis+C+virus+NS5B+RNA-dependent+RNA+polymerase&column=ki&startPg=0&Increment=50&submit=Search			67957989	165223221						ZINC96170425	1	RTEEAIYQCCDLDPQARVAIRSLTERLYVGGPLTNSRGENCGYRRRASGVLTTSCGNTLTCYIKAQAACRAAGRQDCTMLVCGDDLVVICESAGVQEDAASLRAFTEAMTRYSAPPGDPPQPEYDLELITSCSSNVSVAHDGAGKRVYYLTRDPTTPLARAAWETARHTPVNSWLGNIIMFAPTLWVRMIMLTHFFSVLIARDQLEQALDCEIYGACYSIEPLLPPIIQ									Q8JXU8
217971	CNC(=O)c1c(oc2ccc(c(F)c12)-c1cc(cc(F)c1C)C(=O)NC1(COC1)c1ncccn1)-c1ccc(F)cc1	InChI=1S/C31H23F3N4O4/c1-16-21(12-18(13-22(16)33)28(39)38-31(14-41-15-31)30-36-10-3-11-37-30)20-8-9-23-24(26(20)34)25(29(40)35-2)27(42-23)17-4-6-19(32)7-5-17/h3-13H,14-15H2,1-2H3,(H,35,40)(H,38,39)	ATMGBTIQNKGCOO-UHFFFAOYSA-N	100761	US8507683, 12	Hepatitis C virus NS5B RNA-dependent RNA polymerase	Hepatitis C virus		6							US Patent				US8507683	Yeung, K; Kadow, JF; Bora, RO; Selvakumar, K	Bristol-Myers Squibb Company	http://www.bindingdb.org/bind/chemsearch/marvin/MolStructure.jsp?monomerid=100761	http://www.bindingdb.org/jsp/dbsearch/PrimarySearch_ki.jsp?energyterm=kJ/mole&tag=pol&polymerid=5565&target=Hepatitis+C+virus+NS5B+RNA-dependent+RNA+polymerase&column=ki&startPg=0&Increment=50&submit=Search	http://www.bindingdb.org/jsp/dbsearch/PrimarySearch_ki.jsp?energyterm=kJ/mole&tag=r21&monomerid=100761&enzyme=Hepatitis+C+virus+NS5B+RNA-dependent+RNA+polymerase&column=ki&startPg=0&Increment=50&submit=Search			67957715	165223222						ZINC96170426	1	RTEEAIYQCCDLDPQARVAIRSLTERLYVGGPLTNSRGENCGYRRRASGVLTTSCGNTLTCYIKAQAACRAAGRQDCTMLVCGDDLVVICESAGVQEDAASLRAFTEAMTRYSAPPGDPPQPEYDLELITSCSSNVSVAHDGAGKRVYYLTRDPTTPLARAAWETARHTPVNSWLGNIIMFAPTLWVRMIMLTHFFSVLIARDQLEQALDCEIYGACYSIEPLLPPIIQ									Q8JXU8
273482	C[C@]1(O)[C@@H](O)[C@H](COP(O)(=O)OP(O)(=O)OP(O)(O)=O)O[C@]1(C#N)n1ccc(=O)[nH]c1=O	InChI=1/C11H16N3O15P3/c1-10(18)8(16)6(4-26-31(22,23)29-32(24,25)28-30(19,20)21)27-11(10,5-12)14-3-2-7(15)13-9(14)17/h2-3,6,8,16,18H,4H2,1H3,(H,22,23)(H,24,25)(H,13,15,17)(H2,19,20,21)/t6-,8-,10-,11-/s2	GTHRLZPGJDGRFE-XNJPWKEHNA-N	139220	US8877733, 27	Genome polyprotein	Hepatitis C virus		27000					7.5	35.00 C	US Patent				US8877733	Cho, A; Kim, CU; Kirschberg, TA; Mish, MR; Squires, N	Gilead Sciences, Inc.	http://www.bindingdb.org/bind/chemsearch/marvin/MolStructure.jsp?monomerid=139220	http://www.bindingdb.org/jsp/dbsearch/PrimarySearch_ki.jsp?energyterm=kJ/mole&tag=pol&polymerid=5492&target=Genome+polyprotein&column=ki&startPg=0&Increment=50&submit=Search	http://www.bindingdb.org/jsp/dbsearch/PrimarySearch_ki.jsp?energyterm=kJ/mole&tag=r21&monomerid=139220&enzyme=Genome+polyprotein&column=ki&startPg=0&Increment=50&submit=Search			91669038	249870542					C03517		1	MSTNPKPQKKNKRNTNRRPQDVKFPGGGQIVGGVYLLPRRGPRLGVRATRKTSERSQPRGRRQPIPKARRPEGRTWAQPGYPWPLYGNEGCGWAGWLLSPRGSRPSWGPTDPRRRSRNLGKVIDTLTCGFADLMGYIPLVGAPLGGAARALAHGVRVLEDGVNYATGNLPGCSFSIFLLALLSCLTVPASAYQVRNSTGLYHVTNDCPNSSIVYEAADAILHTPGCVPCVREGNASRCWVAMTPTVATRDGKLPATQLRRHIDLLVGSATLCSALYVGDLCGSVFLVGQLFTFSPRRHWTTQGCNCSIYPGHITGHRMAWDMMMNWSPTTALVMAQLLRIPQAILDMIAGAHWGVLAGIAYFSMVGNWAKVLVVLLLFAGVDAETHVTGGSAGHTVSGF…	1DXW,1JXP,1NHU,1NHV,1QUV,2D3U,2D3Z,2D41,2GC8,2HWH,2HWI,2I1R,2IJN,2JC0,2JC1,2K1Q,2O5D,2QE2,2QE5,2XHV,2ZKU,3BR9,3BSA,3BSC,3CDE,3CO9,3CVK,3CWJ,3D28,3D5M,3E51,3GYN,3H2L,3IGV,3PHE,3Q0Z,3QGD,3QGE,3QGF,3QGG,3UDL,3VQS,4EO6,4EO8,4NLD,4RY4,4RY5,4RY6,4RY7,5PZK,5PZL,5PZM,5PZN,5PZP,5TRH,5TRI,5TRJ,5TRK,5TWN,6FE6	Genome polyprotein	POLG_HCV1	P26664	Q9IFE5
273483	C[C@]1(O)[C@@H](O)[C@H](COP(O)(=O)OP(O)(=O)OP(O)(O)=O)O[C@]1(C#N)n1ccc(N)nc1=O	InChI=1/C11H17N4O14P3/c1-10(18)8(16)6(4-26-31(22,23)29-32(24,25)28-30(19,20)21)27-11(10,5-12)15-3-2-7(13)14-9(15)17/h2-3,6,8,16,18H,4H2,1H3,(H,22,23)(H,24,25)(H2,13,14,17)(H2,19,20,21)/t6-,8-,10-,11-/s2	KAONGDYMRWWDBJ-XNJPWKEHNA-N	139221	US8877733, 28	Genome polyprotein	Hepatitis C virus		18000					7.5	35.00 C	US Patent				US8877733	Cho, A; Kim, CU; Kirschberg, TA; Mish, MR; Squires, N	Gilead Sciences, Inc.	http://www.bindingdb.org/bind/chemsearch/marvin/MolStructure.jsp?monomerid=139221	http://www.bindingdb.org/jsp/dbsearch/PrimarySearch_ki.jsp?energyterm=kJ/mole&tag=pol&polymerid=5492&target=Genome+polyprotein&column=ki&startPg=0&Increment=50&submit=Search	http://www.bindingdb.org/jsp/dbsearch/PrimarySearch_ki.jsp?energyterm=kJ/mole&tag=r21&monomerid=139221&enzyme=Genome+polyprotein&column=ki&startPg=0&Increment=50&submit=Search			91669039	249870543					C03517		1	MSTNPKPQKKNKRNTNRRPQDVKFPGGGQIVGGVYLLPRRGPRLGVRATRKTSERSQPRGRRQPIPKARRPEGRTWAQPGYPWPLYGNEGCGWAGWLLSPRGSRPSWGPTDPRRRSRNLGKVIDTLTCGFADLMGYIPLVGAPLGGAARALAHGVRVLEDGVNYATGNLPGCSFSIFLLALLSCLTVPASAYQVRNSTGLYHVTNDCPNSSIVYEAADAILHTPGCVPCVREGNASRCWVAMTPTVATRDGKLPATQLRRHIDLLVGSATLCSALYVGDLCGSVFLVGQLFTFSPRRHWTTQGCNCSIYPGHITGHRMAWDMMMNWSPTTALVMAQLLRIPQAILDMIAGAHWGVLAGIAYFSMVGNWAKVLVVLLLFAGVDAETHVTGGSAGHTVSGF…	1DXW,1JXP,1NHU,1NHV,1QUV,2D3U,2D3Z,2D41,2GC8,2HWH,2HWI,2I1R,2IJN,2JC0,2JC1,2K1Q,2O5D,2QE2,2QE5,2XHV,2ZKU,3BR9,3BSA,3BSC,3CDE,3CO9,3CVK,3CWJ,3D28,3D5M,3E51,3GYN,3H2L,3IGV,3PHE,3Q0Z,3QGD,3QGE,3QGF,3QGG,3UDL,3VQS,4EO6,4EO8,4NLD,4RY4,4RY5,4RY6,4RY7,5PZK,5PZL,5PZM,5PZN,5PZP,5TRH,5TRI,5TRJ,5TRK,5TWN,6FE6	Genome polyprotein	POLG_HCV1	P26664	Q9IFE5
50001070	OC(=O)C(=O)CC(=O)c1cccc(OCc2ccccc2)c1	InChI=1S/C17H14O5/c18-15(10-16(19)17(20)21)13-7-4-8-14(9-13)22-11-12-5-2-1-3-6-12/h1-9H,10-11H2,(H,20,21)	FCBLTJFBERTVBY-UHFFFAOYSA-N	50115572	(Z)-4-(3-Benzyloxy-phenyl)-2-hydroxy-4-oxo-but-2-enoic acid::4-(3-Benzyloxy-phenyl)-2-hydroxy-4-oxo-but-2-enoic acid::CHEMBL108253::CHEMBL18927::CHEMBL492770	Hepatitis C virus NS5B RNA-dependent RNA polymerase	Hepatitis C virus		8000							ChEMBL	10.1021/jm0342109	14695815			Summa, V; Petrocchi, A; Pace, P; Matassa, VG; De Francesco, R; Altamura, S; Tomei, L; Koch, U; Neuner, P	Italy. Vinc	http://www.bindingdb.org/bind/chemsearch/marvin/MolStructure.jsp?monomerid=50115572	http://www.bindingdb.org/jsp/dbsearch/PrimarySearch_ki.jsp?energyterm=kJ/mole&tag=pol&polymerid=5565&target=Hepatitis+C+virus+NS5B+RNA-dependent+RNA+polymerase&column=ki&startPg=0&Increment=50&submit=Search	http://www.bindingdb.org/jsp/dbsearch/PrimarySearch_ki.jsp?energyterm=kJ/mole&tag=r21&monomerid=50115572&enzyme=Hepatitis+C+virus+NS5B+RNA-dependent+RNA+polymerase&column=ki&startPg=0&Increment=50&submit=Search			493415	104009487		CHEMBL108253CHEMBL492770CHEMBL18927			C00972	ZINC13488694	1	RTEEAIYQCCDLDPQARVAIRSLTERLYVGGPLTNSRGENCGYRRRASGVLTTSCGNTLTCYIKAQAACRAAGRQDCTMLVCGDDLVVICESAGVQEDAASLRAFTEAMTRYSAPPGDPPQPEYDLELITSCSSNVSVAHDGAGKRVYYLTRDPTTPLARAAWETARHTPVNSWLGNIIMFAPTLWVRMIMLTHFFSVLIARDQLEQALDCEIYGACYSIEPLLPPIIQ									Q8JXU8
50001071	OC(=O)C(=O)CC(=O)c1cccc(COc2ccccc2)c1	InChI=1S/C17H14O5/c18-15(10-16(19)17(20)21)13-6-4-5-12(9-13)11-22-14-7-2-1-3-8-14/h1-9H,10-11H2,(H,20,21)	RQGPHJUEJRVLGH-UHFFFAOYSA-N	50137865	2,4-Dioxo-4-(3-phenoxymethyl-phenyl)-butyric acid::CHEMBL175095	Hepatitis C virus NS5B RNA-dependent RNA polymerase	Hepatitis C virus		30000							ChEMBL	10.1021/jm0342109	14695815			Summa, V; Petrocchi, A; Pace, P; Matassa, VG; De Francesco, R; Altamura, S; Tomei, L; Koch, U; Neuner, P	Italy. Vinc	http://www.bindingdb.org/bind/chemsearch/marvin/MolStructure.jsp?monomerid=50137865	http://www.bindingdb.org/jsp/dbsearch/PrimarySearch_ki.jsp?energyterm=kJ/mole&tag=pol&polymerid=5565&target=Hepatitis+C+virus+NS5B+RNA-dependent+RNA+polymerase&column=ki&startPg=0&Increment=50&submit=Search	http://www.bindingdb.org/jsp/dbsearch/PrimarySearch_ki.jsp?energyterm=kJ/mole&tag=r21&monomerid=50137865&enzyme=Hepatitis+C+virus+NS5B+RNA-dependent+RNA+polymerase&column=ki&startPg=0&Increment=50&submit=Search			510745	104028008		CHEMBL175095			C00972	ZINC13531976	1	RTEEAIYQCCDLDPQARVAIRSLTERLYVGGPLTNSRGENCGYRRRASGVLTTSCGNTLTCYIKAQAACRAAGRQDCTMLVCGDDLVVICESAGVQEDAASLRAFTEAMTRYSAPPGDPPQPEYDLELITSCSSNVSVAHDGAGKRVYYLTRDPTTPLARAAWETARHTPVNSWLGNIIMFAPTLWVRMIMLTHFFSVLIARDQLEQALDCEIYGACYSIEPLLPPIIQ									Q8JXU8
50001072	OC(=O)C(=O)CC(=O)c1cccc(NC(=O)c2ccccc2)c1	InChI=1S/C17H13NO5/c19-14(10-15(20)17(22)23)12-7-4-8-13(9-12)18-16(21)11-5-2-1-3-6-11/h1-9H,10H2,(H,18,21)(H,22,23)	SZGGDEQGRQUBNR-UHFFFAOYSA-N	50115574	4-(3-Benzoylamino-phenyl)-2-hydroxy-4-oxo-but-2-enoic acid::CHEMBL322472::CHEMBL366966	Hepatitis C virus NS5B RNA-dependent RNA polymerase	Hepatitis C virus		11000							ChEMBL	10.1021/jm0342109	14695815			Summa, V; Petrocchi, A; Pace, P; Matassa, VG; De Francesco, R; Altamura, S; Tomei, L; Koch, U; Neuner, P	Italy. Vinc	http://www.bindingdb.org/bind/chemsearch/marvin/MolStructure.jsp?monomerid=50115574	http://www.bindingdb.org/jsp/dbsearch/PrimarySearch_ki.jsp?energyterm=kJ/mole&tag=pol&polymerid=5565&target=Hepatitis+C+virus+NS5B+RNA-dependent+RNA+polymerase&column=ki&startPg=0&Increment=50&submit=Search	http://www.bindingdb.org/jsp/dbsearch/PrimarySearch_ki.jsp?energyterm=kJ/mole&tag=r21&monomerid=50115574&enzyme=Hepatitis+C+virus+NS5B+RNA-dependent+RNA+polymerase&column=ki&startPg=0&Increment=50&submit=Search			493416	104009489		CHEMBL322472CHEMBL366966			C00972	ZINC13531967	1	RTEEAIYQCCDLDPQARVAIRSLTERLYVGGPLTNSRGENCGYRRRASGVLTTSCGNTLTCYIKAQAACRAAGRQDCTMLVCGDDLVVICESAGVQEDAASLRAFTEAMTRYSAPPGDPPQPEYDLELITSCSSNVSVAHDGAGKRVYYLTRDPTTPLARAAWETARHTPVNSWLGNIIMFAPTLWVRMIMLTHFFSVLIARDQLEQALDCEIYGACYSIEPLLPPIIQ									Q8JXU8
50001073	OC(=O)C(=O)CC(=O)c1cc(OCc2ccccc2C#N)ccc1OCCCC#N	InChI=1S/C22H18N2O6/c23-9-3-4-10-29-21-8-7-17(11-18(21)19(25)12-20(26)22(27)28)30-14-16-6-2-1-5-15(16)13-24/h1-2,5-8,11H,3-4,10,12,14H2,(H,27,28)	XDEQKQDWQDRQJQ-UHFFFAOYSA-N	50137879	(Z)-4-[5-(2-Cyano-benzyloxy)-2-(3-cyano-propoxy)-phenyl]-2-hydroxy-4-oxo-but-2-enoic acid::CHEMBL175364	Hepatitis C virus NS5B RNA-dependent RNA polymerase	Hepatitis C virus		>50000							ChEMBL	10.1021/jm0342109	14695815			Summa, V; Petrocchi, A; Pace, P; Matassa, VG; De Francesco, R; Altamura, S; Tomei, L; Koch, U; Neuner, P	Italy. Vinc	http://www.bindingdb.org/bind/chemsearch/marvin/MolStructure.jsp?monomerid=50137879	http://www.bindingdb.org/jsp/dbsearch/PrimarySearch_ki.jsp?energyterm=kJ/mole&tag=pol&polymerid=5565&target=Hepatitis+C+virus+NS5B+RNA-dependent+RNA+polymerase&column=ki&startPg=0&Increment=50&submit=Search	http://www.bindingdb.org/jsp/dbsearch/PrimarySearch_ki.jsp?energyterm=kJ/mole&tag=r21&monomerid=50137879&enzyme=Hepatitis+C+virus+NS5B+RNA-dependent+RNA+polymerase&column=ki&startPg=0&Increment=50&submit=Search			11486569	104028022		CHEMBL175364			C00972	ZINC28093905	1	RTEEAIYQCCDLDPQARVAIRSLTERLYVGGPLTNSRGENCGYRRRASGVLTTSCGNTLTCYIKAQAACRAAGRQDCTMLVCGDDLVVICESAGVQEDAASLRAFTEAMTRYSAPPGDPPQPEYDLELITSCSSNVSVAHDGAGKRVYYLTRDPTTPLARAAWETARHTPVNSWLGNIIMFAPTLWVRMIMLTHFFSVLIARDQLEQALDCEIYGACYSIEPLLPPIIQ									Q8JXU8
50001074	OC(=O)C(=O)CC(=O)c1cccc(OCc2cccc(c2)C#N)c1	InChI=1S/C18H13NO5/c19-10-12-3-1-4-13(7-12)11-24-15-6-2-5-14(8-15)16(20)9-17(21)18(22)23/h1-8H,9,11H2,(H,22,23)	OXDQVGYGCLHKMY-UHFFFAOYSA-N	50137868	(Z)-4-[3-(3-Cyano-benzyloxy)-phenyl]-2-hydroxy-4-oxo-but-2-enoic acid::CHEMBL177930	Hepatitis C virus NS5B RNA-dependent RNA polymerase	Hepatitis C virus		6700							ChEMBL	10.1021/jm0342109	14695815			Summa, V; Petrocchi, A; Pace, P; Matassa, VG; De Francesco, R; Altamura, S; Tomei, L; Koch, U; Neuner, P	Italy. Vinc	http://www.bindingdb.org/bind/chemsearch/marvin/MolStructure.jsp?monomerid=50137868	http://www.bindingdb.org/jsp/dbsearch/PrimarySearch_ki.jsp?energyterm=kJ/mole&tag=pol&polymerid=5565&target=Hepatitis+C+virus+NS5B+RNA-dependent+RNA+polymerase&column=ki&startPg=0&Increment=50&submit=Search	http://www.bindingdb.org/jsp/dbsearch/PrimarySearch_ki.jsp?energyterm=kJ/mole&tag=r21&monomerid=50137868&enzyme=Hepatitis+C+virus+NS5B+RNA-dependent+RNA+polymerase&column=ki&startPg=0&Increment=50&submit=Search			510673	104028011		CHEMBL177930			C00972	ZINC28103989	1	RTEEAIYQCCDLDPQARVAIRSLTERLYVGGPLTNSRGENCGYRRRASGVLTTSCGNTLTCYIKAQAACRAAGRQDCTMLVCGDDLVVICESAGVQEDAASLRAFTEAMTRYSAPPGDPPQPEYDLELITSCSSNVSVAHDGAGKRVYYLTRDPTTPLARAAWETARHTPVNSWLGNIIMFAPTLWVRMIMLTHFFSVLIARDQLEQALDCEIYGACYSIEPLLPPIIQ									Q8JXU8
50001075	CCCCCOc1ccccc1C(=O)CC(=O)C(O)=O	InChI=1S/C15H18O5/c1-2-3-6-9-20-14-8-5-4-7-11(14)12(16)10-13(17)15(18)19/h4-5,7-8H,2-3,6,9-10H2,1H3,(H,18,19)	MDYNAILQUKQFLR-UHFFFAOYSA-N	50137861	2,4-Dioxo-4-(2-pentyloxy-phenyl)-butyric acid::CHEMBL426948	Hepatitis C virus NS5B RNA-dependent RNA polymerase	Hepatitis C virus		25000							ChEMBL	10.1021/jm0342109	14695815			Summa, V; Petrocchi, A; Pace, P; Matassa, VG; De Francesco, R; Altamura, S; Tomei, L; Koch, U; Neuner, P	Italy. Vinc	http://www.bindingdb.org/bind/chemsearch/marvin/MolStructure.jsp?monomerid=50137861	http://www.bindingdb.org/jsp/dbsearch/PrimarySearch_ki.jsp?energyterm=kJ/mole&tag=pol&polymerid=5565&target=Hepatitis+C+virus+NS5B+RNA-dependent+RNA+polymerase&column=ki&startPg=0&Increment=50&submit=Search	http://www.bindingdb.org/jsp/dbsearch/PrimarySearch_ki.jsp?energyterm=kJ/mole&tag=r21&monomerid=50137861&enzyme=Hepatitis+C+virus+NS5B+RNA-dependent+RNA+polymerase&column=ki&startPg=0&Increment=50&submit=Search			510698	104028004		CHEMBL426948			C00972	ZINC13531961	1	RTEEAIYQCCDLDPQARVAIRSLTERLYVGGPLTNSRGENCGYRRRASGVLTTSCGNTLTCYIKAQAACRAAGRQDCTMLVCGDDLVVICESAGVQEDAASLRAFTEAMTRYSAPPGDPPQPEYDLELITSCSSNVSVAHDGAGKRVYYLTRDPTTPLARAAWETARHTPVNSWLGNIIMFAPTLWVRMIMLTHFFSVLIARDQLEQALDCEIYGACYSIEPLLPPIIQ									Q8JXU8
50001076	OC(=O)C(=O)CC(=O)c1cccc(OCc2cc(Cl)cc(Cl)c2C#N)c1	InChI=1S/C18H11Cl2NO5/c19-12-4-11(14(8-21)15(20)6-12)9-26-13-3-1-2-10(5-13)16(22)7-17(23)18(24)25/h1-6H,7,9H2,(H,24,25)	NLBOGEWZWDRQOT-UHFFFAOYSA-N	50137854	(Z)-4-[3-(3,5-Dichloro-2-cyano-benzyloxy)-phenyl]-2-hydroxy-4-oxo-but-2-enoic acid::CHEMBL174719	Hepatitis C virus NS5B RNA-dependent RNA polymerase	Hepatitis C virus		45							ChEMBL	10.1021/jm0342109	14695815			Summa, V; Petrocchi, A; Pace, P; Matassa, VG; De Francesco, R; Altamura, S; Tomei, L; Koch, U; Neuner, P	Italy. Vinc	http://www.bindingdb.org/bind/chemsearch/marvin/MolStructure.jsp?monomerid=50137854	http://www.bindingdb.org/jsp/dbsearch/PrimarySearch_ki.jsp?energyterm=kJ/mole&tag=pol&polymerid=5565&target=Hepatitis+C+virus+NS5B+RNA-dependent+RNA+polymerase&column=ki&startPg=0&Increment=50&submit=Search	http://www.bindingdb.org/jsp/dbsearch/PrimarySearch_ki.jsp?energyterm=kJ/mole&tag=r21&monomerid=50137854&enzyme=Hepatitis+C+virus+NS5B+RNA-dependent+RNA+polymerase&column=ki&startPg=0&Increment=50&submit=Search			510618	104027997		CHEMBL174719			C00972	ZINC16051430	1	RTEEAIYQCCDLDPQARVAIRSLTERLYVGGPLTNSRGENCGYRRRASGVLTTSCGNTLTCYIKAQAACRAAGRQDCTMLVCGDDLVVICESAGVQEDAASLRAFTEAMTRYSAPPGDPPQPEYDLELITSCSSNVSVAHDGAGKRVYYLTRDPTTPLARAAWETARHTPVNSWLGNIIMFAPTLWVRMIMLTHFFSVLIARDQLEQALDCEIYGACYSIEPLLPPIIQ									Q8JXU8
50001077	OC(=O)C(=O)CC(=O)c1cccc(OCc2ccccc2C#N)c1	InChI=1S/C18H13NO5/c19-10-13-4-1-2-5-14(13)11-24-15-7-3-6-12(8-15)16(20)9-17(21)18(22)23/h1-8H,9,11H2,(H,22,23)	TYXIHPKYAVBEHE-UHFFFAOYSA-N	50137856	(Z)-4-[3-(2-Cyano-benzyloxy)-phenyl]-2-hydroxy-4-oxo-but-2-enoic acid::CHEMBL177929	Hepatitis C virus NS5B RNA-dependent RNA polymerase	Hepatitis C virus		230							ChEMBL	10.1021/jm0342109	14695815			Summa, V; Petrocchi, A; Pace, P; Matassa, VG; De Francesco, R; Altamura, S; Tomei, L; Koch, U; Neuner, P	Italy. Vinc	http://www.bindingdb.org/bind/chemsearch/marvin/MolStructure.jsp?monomerid=50137856	http://www.bindingdb.org/jsp/dbsearch/PrimarySearch_ki.jsp?energyterm=kJ/mole&tag=pol&polymerid=5565&target=Hepatitis+C+virus+NS5B+RNA-dependent+RNA+polymerase&column=ki&startPg=0&Increment=50&submit=Search	http://www.bindingdb.org/jsp/dbsearch/PrimarySearch_ki.jsp?energyterm=kJ/mole&tag=r21&monomerid=50137856&enzyme=Hepatitis+C+virus+NS5B+RNA-dependent+RNA+polymerase&column=ki&startPg=0&Increment=50&submit=Search			510629	104027999		CHEMBL177929			C00972	ZINC28103983	1	RTEEAIYQCCDLDPQARVAIRSLTERLYVGGPLTNSRGENCGYRRRASGVLTTSCGNTLTCYIKAQAACRAAGRQDCTMLVCGDDLVVICESAGVQEDAASLRAFTEAMTRYSAPPGDPPQPEYDLELITSCSSNVSVAHDGAGKRVYYLTRDPTTPLARAAWETARHTPVNSWLGNIIMFAPTLWVRMIMLTHFFSVLIARDQLEQALDCEIYGACYSIEPLLPPIIQ									Q8JXU8
50001078	OC(=O)C(=O)CC(=O)c1cccc(OCc2cccc(Cl)c2C#N)c1	InChI=1S/C18H12ClNO5/c19-15-6-2-4-12(14(15)9-20)10-25-13-5-1-3-11(7-13)16(21)8-17(22)18(23)24/h1-7H,8,10H2,(H,23,24)	GVIJTJMWRPOFRD-UHFFFAOYSA-N	50137855	(Z)-4-[3-(3-Chloro-2-cyano-benzyloxy)-phenyl]-2-hydroxy-4-oxo-but-2-enoic acid::CHEMBL366823	Hepatitis C virus NS5B RNA-dependent RNA polymerase	Hepatitis C virus		110							ChEMBL	10.1021/jm0342109	14695815			Summa, V; Petrocchi, A; Pace, P; Matassa, VG; De Francesco, R; Altamura, S; Tomei, L; Koch, U; Neuner, P	Italy. Vinc	http://www.bindingdb.org/bind/chemsearch/marvin/MolStructure.jsp?monomerid=50137855	http://www.bindingdb.org/jsp/dbsearch/PrimarySearch_ki.jsp?energyterm=kJ/mole&tag=pol&polymerid=5565&target=Hepatitis+C+virus+NS5B+RNA-dependent+RNA+polymerase&column=ki&startPg=0&Increment=50&submit=Search	http://www.bindingdb.org/jsp/dbsearch/PrimarySearch_ki.jsp?energyterm=kJ/mole&tag=r21&monomerid=50137855&enzyme=Hepatitis+C+virus+NS5B+RNA-dependent+RNA+polymerase&column=ki&startPg=0&Increment=50&submit=Search			510744	104027998		CHEMBL366823			C00972	ZINC13531990	1	RTEEAIYQCCDLDPQARVAIRSLTERLYVGGPLTNSRGENCGYRRRASGVLTTSCGNTLTCYIKAQAACRAAGRQDCTMLVCGDDLVVICESAGVQEDAASLRAFTEAMTRYSAPPGDPPQPEYDLELITSCSSNVSVAHDGAGKRVYYLTRDPTTPLARAAWETARHTPVNSWLGNIIMFAPTLWVRMIMLTHFFSVLIARDQLEQALDCEIYGACYSIEPLLPPIIQ									Q8JXU8
50001079	OC(=O)C(=O)CC(=O)c1ccco1	InChI=1S/C8H6O5/c9-5(4-6(10)8(11)12)7-2-1-3-13-7/h1-3H,4H2,(H,11,12)	DQHQTWRAARLYCW-UHFFFAOYSA-N	50137880	4-Furan-2-yl-2,4-dioxo-butyric acid::CHEMBL177529::CHEMBL199039	Hepatitis C virus NS5B RNA-dependent RNA polymerase	Hepatitis C virus		>50000							ChEMBL	10.1021/jm0342109	14695815			Summa, V; Petrocchi, A; Pace, P; Matassa, VG; De Francesco, R; Altamura, S; Tomei, L; Koch, U; Neuner, P	Italy. Vinc	http://www.bindingdb.org/bind/chemsearch/marvin/MolStructure.jsp?monomerid=50137880	http://www.bindingdb.org/jsp/dbsearch/PrimarySearch_ki.jsp?energyterm=kJ/mole&tag=pol&polymerid=5565&target=Hepatitis+C+virus+NS5B+RNA-dependent+RNA+polymerase&column=ki&startPg=0&Increment=50&submit=Search	http://www.bindingdb.org/jsp/dbsearch/PrimarySearch_ki.jsp?energyterm=kJ/mole&tag=r21&monomerid=50137880&enzyme=Hepatitis+C+virus+NS5B+RNA-dependent+RNA+polymerase&column=ki&startPg=0&Increment=50&submit=Search			510839	104028023		CHEMBL199039CHEMBL177529			C00972	ZINC19850352	1	RTEEAIYQCCDLDPQARVAIRSLTERLYVGGPLTNSRGENCGYRRRASGVLTTSCGNTLTCYIKAQAACRAAGRQDCTMLVCGDDLVVICESAGVQEDAASLRAFTEAMTRYSAPPGDPPQPEYDLELITSCSSNVSVAHDGAGKRVYYLTRDPTTPLARAAWETARHTPVNSWLGNIIMFAPTLWVRMIMLTHFFSVLIARDQLEQALDCEIYGACYSIEPLLPPIIQ									Q8JXU8
50001080	CC(=O)CC(=O)C(O)=O	InChI=1S/C5H6O4/c1-3(6)2-4(7)5(8)9/h2H2,1H3,(H,8,9)	UNRQTHVKJQUDDF-UHFFFAOYSA-N	50137860	2,4-dioxopentanoic acid::2,4-dioxovaleric acid::Acetylpyruvate::CHEMBL2040643::CHEMBL46789::acetylpyruvic acid	Hepatitis C virus NS5B RNA-dependent RNA polymerase	Hepatitis C virus		>50000							ChEMBL	10.1021/jm0342109	14695815			Summa, V; Petrocchi, A; Pace, P; Matassa, VG; De Francesco, R; Altamura, S; Tomei, L; Koch, U; Neuner, P	Italy. Vinc	http://www.bindingdb.org/bind/chemsearch/marvin/MolStructure.jsp?monomerid=50137860	http://www.bindingdb.org/jsp/dbsearch/PrimarySearch_ki.jsp?energyterm=kJ/mole&tag=pol&polymerid=5565&target=Hepatitis+C+virus+NS5B+RNA-dependent+RNA+polymerase&column=ki&startPg=0&Increment=50&submit=Search	http://www.bindingdb.org/jsp/dbsearch/PrimarySearch_ki.jsp?energyterm=kJ/mole&tag=r21&monomerid=50137860&enzyme=Hepatitis+C+virus+NS5B+RNA-dependent+RNA+polymerase&column=ki&startPg=0&Increment=50&submit=Search			21919	104028003	2424	CHEMBL46789CHEMBL2040643			C02132	ZINC26542741	1	RTEEAIYQCCDLDPQARVAIRSLTERLYVGGPLTNSRGENCGYRRRASGVLTTSCGNTLTCYIKAQAACRAAGRQDCTMLVCGDDLVVICESAGVQEDAASLRAFTEAMTRYSAPPGDPPQPEYDLELITSCSSNVSVAHDGAGKRVYYLTRDPTTPLARAAWETARHTPVNSWLGNIIMFAPTLWVRMIMLTHFFSVLIARDQLEQALDCEIYGACYSIEPLLPPIIQ									Q8JXU8
50001081	OC(=O)C(=O)CC(=O)c1ccncc1	InChI=1S/C9H7NO4/c11-7(5-8(12)9(13)14)6-1-3-10-4-2-6/h1-4H,5H2,(H,13,14)	ROQQLNHLFCKPOQ-UHFFFAOYSA-N	50137852	2,4-Dioxo-4-pyridin-3-yl-butyric acid::CHEMBL177297	Hepatitis C virus NS5B RNA-dependent RNA polymerase	Hepatitis C virus		>50000							ChEMBL	10.1021/jm0342109	14695815			Summa, V; Petrocchi, A; Pace, P; Matassa, VG; De Francesco, R; Altamura, S; Tomei, L; Koch, U; Neuner, P	Italy. Vinc	http://www.bindingdb.org/bind/chemsearch/marvin/MolStructure.jsp?monomerid=50137852	http://www.bindingdb.org/jsp/dbsearch/PrimarySearch_ki.jsp?energyterm=kJ/mole&tag=pol&polymerid=5565&target=Hepatitis+C+virus+NS5B+RNA-dependent+RNA+polymerase&column=ki&startPg=0&Increment=50&submit=Search	http://www.bindingdb.org/jsp/dbsearch/PrimarySearch_ki.jsp?energyterm=kJ/mole&tag=r21&monomerid=50137852&enzyme=Hepatitis+C+virus+NS5B+RNA-dependent+RNA+polymerase&column=ki&startPg=0&Increment=50&submit=Search			516697	104027995		CHEMBL177297			C00972	ZINC19850341	1	RTEEAIYQCCDLDPQARVAIRSLTERLYVGGPLTNSRGENCGYRRRASGVLTTSCGNTLTCYIKAQAACRAAGRQDCTMLVCGDDLVVICESAGVQEDAASLRAFTEAMTRYSAPPGDPPQPEYDLELITSCSSNVSVAHDGAGKRVYYLTRDPTTPLARAAWETARHTPVNSWLGNIIMFAPTLWVRMIMLTHFFSVLIARDQLEQALDCEIYGACYSIEPLLPPIIQ									Q8JXU8
50001082	OC(=O)C(=O)CC(=O)c1cccc(NS(=O)(=O)c2ccccc2)c1	InChI=1S/C16H13NO6S/c18-14(10-15(19)16(20)21)11-5-4-6-12(9-11)17-24(22,23)13-7-2-1-3-8-13/h1-9,17H,10H2,(H,20,21)	PBXNBVGNXBZXSA-UHFFFAOYSA-N	50137872	2,4-dioxo-4-{3-[(phenylsulfonyl)amino]phenyl}butanoic acid::4-(3-Benzenesulfonylamino-phenyl)-2,4-dioxo-butyric acid::CHEMBL175533	Hepatitis C virus NS5B RNA-dependent RNA polymerase	Hepatitis C virus		16000							ChEMBL	10.1021/jm0342109	14695815			Summa, V; Petrocchi, A; Pace, P; Matassa, VG; De Francesco, R; Altamura, S; Tomei, L; Koch, U; Neuner, P	Italy. Vinc	http://www.bindingdb.org/bind/chemsearch/marvin/MolStructure.jsp?monomerid=50137872	http://www.bindingdb.org/jsp/dbsearch/PrimarySearch_ki.jsp?energyterm=kJ/mole&tag=pol&polymerid=5565&target=Hepatitis+C+virus+NS5B+RNA-dependent+RNA+polymerase&column=ki&startPg=0&Increment=50&submit=Search	http://www.bindingdb.org/jsp/dbsearch/PrimarySearch_ki.jsp?energyterm=kJ/mole&tag=r21&monomerid=50137872&enzyme=Hepatitis+C+virus+NS5B+RNA-dependent+RNA+polymerase&column=ki&startPg=0&Increment=50&submit=Search			510705	104028015		CHEMBL175533			C00972	ZINC13531970	1	RTEEAIYQCCDLDPQARVAIRSLTERLYVGGPLTNSRGENCGYRRRASGVLTTSCGNTLTCYIKAQAACRAAGRQDCTMLVCGDDLVVICESAGVQEDAASLRAFTEAMTRYSAPPGDPPQPEYDLELITSCSSNVSVAHDGAGKRVYYLTRDPTTPLARAAWETARHTPVNSWLGNIIMFAPTLWVRMIMLTHFFSVLIARDQLEQALDCEIYGACYSIEPLLPPIIQ									Q8JXU8
50001083	OC(=O)C(=O)CC(=O)c1ccccc1OCc1ccccc1	InChI=1S/C17H14O5/c18-14(10-15(19)17(20)21)13-8-4-5-9-16(13)22-11-12-6-2-1-3-7-12/h1-9H,10-11H2,(H,20,21)	STKCEKDDIVPHDO-UHFFFAOYSA-N	50137878	4-(2-Benzyloxy-phenyl)-2,4-dioxo-butyric acid::4-[2-(benzyloxy)phenyl]-2,4-dioxobutanoic acid::CHEMBL199199::CHEMBL368481::CHEMBL499444	Hepatitis C virus NS5B RNA-dependent RNA polymerase	Hepatitis C virus		44000							ChEMBL	10.1021/jm0342109	14695815			Summa, V; Petrocchi, A; Pace, P; Matassa, VG; De Francesco, R; Altamura, S; Tomei, L; Koch, U; Neuner, P	Italy. Vinc	http://www.bindingdb.org/bind/chemsearch/marvin/MolStructure.jsp?monomerid=50137878	http://www.bindingdb.org/jsp/dbsearch/PrimarySearch_ki.jsp?energyterm=kJ/mole&tag=pol&polymerid=5565&target=Hepatitis+C+virus+NS5B+RNA-dependent+RNA+polymerase&column=ki&startPg=0&Increment=50&submit=Search	http://www.bindingdb.org/jsp/dbsearch/PrimarySearch_ki.jsp?energyterm=kJ/mole&tag=r21&monomerid=50137878&enzyme=Hepatitis+C+virus+NS5B+RNA-dependent+RNA+polymerase&column=ki&startPg=0&Increment=50&submit=Search			510646	104028021		CHEMBL199199CHEMBL499444CHEMBL368481			C00972	ZINC13674051	1	RTEEAIYQCCDLDPQARVAIRSLTERLYVGGPLTNSRGENCGYRRRASGVLTTSCGNTLTCYIKAQAACRAAGRQDCTMLVCGDDLVVICESAGVQEDAASLRAFTEAMTRYSAPPGDPPQPEYDLELITSCSSNVSVAHDGAGKRVYYLTRDPTTPLARAAWETARHTPVNSWLGNIIMFAPTLWVRMIMLTHFFSVLIARDQLEQALDCEIYGACYSIEPLLPPIIQ									Q8JXU8
50001084	OC(=O)C(=O)CC(=O)c1ccccc1OCCCC#N	InChI=1S/C14H13NO5/c15-7-3-4-8-20-13-6-2-1-5-10(13)11(16)9-12(17)14(18)19/h1-2,5-6H,3-4,8-9H2,(H,18,19)	OZSGEZVVXJEIDT-UHFFFAOYSA-N	50137875	4-[2-(3-Cyano-propoxy)-phenyl]-2,4-dioxo-butyric acid::4-[2-(3-cyanopropoxy)phenyl]-2,4-dioxobutanoic acid::CHEMBL175171::CHEMBL196154	Hepatitis C virus NS5B RNA-dependent RNA polymerase	Hepatitis C virus		350							ChEMBL	10.1021/jm0342109	14695815			Summa, V; Petrocchi, A; Pace, P; Matassa, VG; De Francesco, R; Altamura, S; Tomei, L; Koch, U; Neuner, P	Italy. Vinc	http://www.bindingdb.org/bind/chemsearch/marvin/MolStructure.jsp?monomerid=50137875	http://www.bindingdb.org/jsp/dbsearch/PrimarySearch_ki.jsp?energyterm=kJ/mole&tag=pol&polymerid=5565&target=Hepatitis+C+virus+NS5B+RNA-dependent+RNA+polymerase&column=ki&startPg=0&Increment=50&submit=Search	http://www.bindingdb.org/jsp/dbsearch/PrimarySearch_ki.jsp?energyterm=kJ/mole&tag=r21&monomerid=50137875&enzyme=Hepatitis+C+virus+NS5B+RNA-dependent+RNA+polymerase&column=ki&startPg=0&Increment=50&submit=Search			510626	104028018		CHEMBL196154CHEMBL175171			C00972	ZINC13531964	1	RTEEAIYQCCDLDPQARVAIRSLTERLYVGGPLTNSRGENCGYRRRASGVLTTSCGNTLTCYIKAQAACRAAGRQDCTMLVCGDDLVVICESAGVQEDAASLRAFTEAMTRYSAPPGDPPQPEYDLELITSCSSNVSVAHDGAGKRVYYLTRDPTTPLARAAWETARHTPVNSWLGNIIMFAPTLWVRMIMLTHFFSVLIARDQLEQALDCEIYGACYSIEPLLPPIIQ									Q8JXU8
50001085	OC(CC(=O)c1ccccc1)C(O)=O	InChI=1/C10H10O4/c11-8(6-9(12)10(13)14)7-4-2-1-3-5-7/h1-5,9,12H,6H2,(H,13,14)	COFAOIWBTJSSPD-UHFFFAOYNA-N	50137857	2-Hydroxy-4-oxo-4-phenyl-butyric acid::2-hydroxy-4-oxo-4-phenylbutanoic acid::CHEMBL177826	Hepatitis C virus NS5B RNA-dependent RNA polymerase	Hepatitis C virus		>50000							ChEMBL	10.1021/jm0342109	14695815			Summa, V; Petrocchi, A; Pace, P; Matassa, VG; De Francesco, R; Altamura, S; Tomei, L; Koch, U; Neuner, P	Italy. Vinc	http://www.bindingdb.org/bind/chemsearch/marvin/MolStructure.jsp?monomerid=50137857	http://www.bindingdb.org/jsp/dbsearch/PrimarySearch_ki.jsp?energyterm=kJ/mole&tag=pol&polymerid=5565&target=Hepatitis+C+virus+NS5B+RNA-dependent+RNA+polymerase&column=ki&startPg=0&Increment=50&submit=Search	http://www.bindingdb.org/jsp/dbsearch/PrimarySearch_ki.jsp?energyterm=kJ/mole&tag=r21&monomerid=50137857&enzyme=Hepatitis+C+virus+NS5B+RNA-dependent+RNA+polymerase&column=ki&startPg=0&Increment=50&submit=Search			516699	104028000		CHEMBL177826			C02929	ZINC13531943	1	RTEEAIYQCCDLDPQARVAIRSLTERLYVGGPLTNSRGENCGYRRRASGVLTTSCGNTLTCYIKAQAACRAAGRQDCTMLVCGDDLVVICESAGVQEDAASLRAFTEAMTRYSAPPGDPPQPEYDLELITSCSSNVSVAHDGAGKRVYYLTRDPTTPLARAAWETARHTPVNSWLGNIIMFAPTLWVRMIMLTHFFSVLIARDQLEQALDCEIYGACYSIEPLLPPIIQ									Q8JXU8
50001086	OC(=O)C(=O)CC(=O)c1ccccc1	InChI=1S/C10H8O4/c11-8(6-9(12)10(13)14)7-4-2-1-3-5-7/h1-5H,6H2,(H,13,14)	JGKFWCXVYCDKDU-UHFFFAOYSA-N	50115579	(Z)-2-hydroxy-4-oxo-4-phenyl-but-2-enoic acid::2-Hydroxy-4-oxo-4-phenyl-but-2-enoic acid::2-Hydroxy-4-oxo-4-phenyl-but-2-enoic acid (0.25H2O)::CHEMBL16326::CHEMBL19332::CHEMBL467389::Sacchettini_CTRL	Hepatitis C virus NS5B RNA-dependent RNA polymerase	Hepatitis C virus		5700							ChEMBL	10.1021/jm0342109	14695815			Summa, V; Petrocchi, A; Pace, P; Matassa, VG; De Francesco, R; Altamura, S; Tomei, L; Koch, U; Neuner, P	Italy. Vinc	http://www.bindingdb.org/bind/chemsearch/marvin/MolStructure.jsp?monomerid=50115579	http://www.bindingdb.org/jsp/dbsearch/PrimarySearch_ki.jsp?energyterm=kJ/mole&tag=pol&polymerid=5565&target=Hepatitis+C+virus+NS5B+RNA-dependent+RNA+polymerase&column=ki&startPg=0&Increment=50&submit=Search	http://www.bindingdb.org/jsp/dbsearch/PrimarySearch_ki.jsp?energyterm=kJ/mole&tag=r21&monomerid=50115579&enzyme=Hepatitis+C+virus+NS5B+RNA-dependent+RNA+polymerase&column=ki&startPg=0&Increment=50&submit=Search	XI7	2XI7,4E5G,3S9I,5LTN,6QW5,4AWF	493418	104009494		CHEMBL467389CHEMBL19332CHEMBL16326			C00972	ZINC12375863	1	RTEEAIYQCCDLDPQARVAIRSLTERLYVGGPLTNSRGENCGYRRRASGVLTTSCGNTLTCYIKAQAACRAAGRQDCTMLVCGDDLVVICESAGVQEDAASLRAFTEAMTRYSAPPGDPPQPEYDLELITSCSSNVSVAHDGAGKRVYYLTRDPTTPLARAAWETARHTPVNSWLGNIIMFAPTLWVRMIMLTHFFSVLIARDQLEQALDCEIYGACYSIEPLLPPIIQ									Q8JXU8
50001087	COC(=O)C(=O)CC(=O)c1ccccc1	InChI=1S/C11H10O4/c1-15-11(14)10(13)7-9(12)8-5-3-2-4-6-8/h2-6H,7H2,1H3	AQYAHPDSJAFBOS-UHFFFAOYSA-N	50125832	(Z)-2-hydroxy-4-oxo-4-phenyl-but-2-enoic acid methyl ester::2-Hydroxy-4-oxo-4-phenyl-but-2-enoic acid methyl ester::CHEMBL16633::CHEMBL177429::CHEMBL456227	Hepatitis C virus NS5B RNA-dependent RNA polymerase	Hepatitis C virus		>50000							ChEMBL	10.1021/jm0342109	14695815			Summa, V; Petrocchi, A; Pace, P; Matassa, VG; De Francesco, R; Altamura, S; Tomei, L; Koch, U; Neuner, P	Italy. Vinc	http://www.bindingdb.org/bind/chemsearch/marvin/MolStructure.jsp?monomerid=50125832	http://www.bindingdb.org/jsp/dbsearch/PrimarySearch_ki.jsp?energyterm=kJ/mole&tag=pol&polymerid=5565&target=Hepatitis+C+virus+NS5B+RNA-dependent+RNA+polymerase&column=ki&startPg=0&Increment=50&submit=Search	http://www.bindingdb.org/jsp/dbsearch/PrimarySearch_ki.jsp?energyterm=kJ/mole&tag=r21&monomerid=50125832&enzyme=Hepatitis+C+virus+NS5B+RNA-dependent+RNA+polymerase&column=ki&startPg=0&Increment=50&submit=Search			308117	104018012		CHEMBL177429CHEMBL456227CHEMBL16633				ZINC05248793	1	RTEEAIYQCCDLDPQARVAIRSLTERLYVGGPLTNSRGENCGYRRRASGVLTTSCGNTLTCYIKAQAACRAAGRQDCTMLVCGDDLVVICESAGVQEDAASLRAFTEAMTRYSAPPGDPPQPEYDLELITSCSSNVSVAHDGAGKRVYYLTRDPTTPLARAAWETARHTPVNSWLGNIIMFAPTLWVRMIMLTHFFSVLIARDQLEQALDCEIYGACYSIEPLLPPIIQ									Q8JXU8
50001088	CC(C)(C)c1ccc(cc1)C(=O)CC(=O)C(O)=O	InChI=1S/C14H16O4/c1-14(2,3)10-6-4-9(5-7-10)11(15)8-12(16)13(17)18/h4-7H,8H2,1-3H3,(H,17,18)	NKKMKTGZKJBJKI-UHFFFAOYSA-N	50137877	4-(4-tert-Butyl-phenyl)-2,4-dioxo-butyric acid::4-(4-tert-butylphenyl)-2,4-dioxobutanoic acid::CHEMBL177776	Hepatitis C virus NS5B RNA-dependent RNA polymerase	Hepatitis C virus		>50000							ChEMBL	10.1021/jm0342109	14695815			Summa, V; Petrocchi, A; Pace, P; Matassa, VG; De Francesco, R; Altamura, S; Tomei, L; Koch, U; Neuner, P	Italy. Vinc	http://www.bindingdb.org/bind/chemsearch/marvin/MolStructure.jsp?monomerid=50137877	http://www.bindingdb.org/jsp/dbsearch/PrimarySearch_ki.jsp?energyterm=kJ/mole&tag=pol&polymerid=5565&target=Hepatitis+C+virus+NS5B+RNA-dependent+RNA+polymerase&column=ki&startPg=0&Increment=50&submit=Search	http://www.bindingdb.org/jsp/dbsearch/PrimarySearch_ki.jsp?energyterm=kJ/mole&tag=r21&monomerid=50137877&enzyme=Hepatitis+C+virus+NS5B+RNA-dependent+RNA+polymerase&column=ki&startPg=0&Increment=50&submit=Search			516700	104028020		CHEMBL177776			C00972	ZINC13531952	1	RTEEAIYQCCDLDPQARVAIRSLTERLYVGGPLTNSRGENCGYRRRASGVLTTSCGNTLTCYIKAQAACRAAGRQDCTMLVCGDDLVVICESAGVQEDAASLRAFTEAMTRYSAPPGDPPQPEYDLELITSCSSNVSVAHDGAGKRVYYLTRDPTTPLARAAWETARHTPVNSWLGNIIMFAPTLWVRMIMLTHFFSVLIARDQLEQALDCEIYGACYSIEPLLPPIIQ									Q8JXU8
50001089	CCCOc1ccccc1C(=O)CC(=O)C(O)=O	InChI=1S/C13H14O5/c1-2-7-18-12-6-4-3-5-9(12)10(14)8-11(15)13(16)17/h3-6H,2,7-8H2,1H3,(H,16,17)	PQIPBYXRQCIIJE-UHFFFAOYSA-N	50137874	2,4-Dioxo-4-(2-propoxy-phenyl)-butyric acid::CHEMBL174910	Hepatitis C virus NS5B RNA-dependent RNA polymerase	Hepatitis C virus		3900							ChEMBL	10.1021/jm0342109	14695815			Summa, V; Petrocchi, A; Pace, P; Matassa, VG; De Francesco, R; Altamura, S; Tomei, L; Koch, U; Neuner, P	Italy. Vinc	http://www.bindingdb.org/bind/chemsearch/marvin/MolStructure.jsp?monomerid=50137874	http://www.bindingdb.org/jsp/dbsearch/PrimarySearch_ki.jsp?energyterm=kJ/mole&tag=pol&polymerid=5565&target=Hepatitis+C+virus+NS5B+RNA-dependent+RNA+polymerase&column=ki&startPg=0&Increment=50&submit=Search	http://www.bindingdb.org/jsp/dbsearch/PrimarySearch_ki.jsp?energyterm=kJ/mole&tag=r21&monomerid=50137874&enzyme=Hepatitis+C+virus+NS5B+RNA-dependent+RNA+polymerase&column=ki&startPg=0&Increment=50&submit=Search			510674	104028017		CHEMBL174910			C00972	ZINC13531955	1	RTEEAIYQCCDLDPQARVAIRSLTERLYVGGPLTNSRGENCGYRRRASGVLTTSCGNTLTCYIKAQAACRAAGRQDCTMLVCGDDLVVICESAGVQEDAASLRAFTEAMTRYSAPPGDPPQPEYDLELITSCSSNVSVAHDGAGKRVYYLTRDPTTPLARAAWETARHTPVNSWLGNIIMFAPTLWVRMIMLTHFFSVLIARDQLEQALDCEIYGACYSIEPLLPPIIQ									Q8JXU8
[truncated: 1,751 more rows]
