# Supplementary material for: Identification of Potential Key Agents for Targeting RNA-Dependent RNA Polymerase of SARS-CoV-2 by Integrated Analysis and Virtual Drug Screening
Source: Front Genet. 2020 Nov 17;11:581668. doi: 10.3389/fgene.2020.581668 (PMC7705243; doi:10.3389/fgene.2020.581668)
Supplement: Supplementary Table 5 — Virus-targeting agents as repurposed candidates for potential clinical use against SARS-CoV-2 RdRp. [file Table_5.XLSX]

## Sheet: Sheet1
Antiviral Agents Name/Drug Name	PubChem CID	Ligand No.	Binding Energy (kcal/mol)	DrugBank ID/ Other ID	Drug Group	Actions	Drug type	Smiles	Disease/Target Organism	Curation/DataSource	Ki (nM)	Inhibition (%)	IC50 (nM)
Lurbinectedin	57327016	11	-11.1	D0V6OA	Phase 2	Inhibitor	Small molecular drug	CC1=CC2=C(C3C4C5C6=C(C(=C7C(=C6C(N4C(C(C2)N3C)O)COC(=O)C8(CS5)C9=C(CCN8)C2=C(N9)C=CC(=C2)OC)OCO7)C)OC(=O)C)C(=C1OC)O	leukaemia; Solid tumour/cancer;	TTD
BILOBETIN	5315459	270	-10.8	CHEMBL378188	experimental	Inhibition	Small molecular drug	COc1ccc(-c2cc(=O)c3c(O)cc(O)cc3o2)cc1-c1c(O)cc(O)c2c(=O)cc(-c3ccc(O)cc3)oc12	SARS-CoV	ChEMBL	80400		72300
SCIADOPITISIN	5281696	211	-10.6	CHEMBL208908	experimental	Inhibition	Small molecular drug	COc1ccc(-c2cc(=O)c3c(O)cc(O)c(-c4cc(-c5cc(=O)c6c(O)cc(OC)cc6o5)ccc4OC)c3o2)cc1	SARS-CoV	ChEMBL			38400
GINKGETIN	5271805	269	-10.2	CHEMBL377324	experimental	Inhibition	Small molecular drug	COc1cc(O)c2c(=O)cc(-c3ccc(OC)c(-c4c(O)cc(O)c5c(=O)cc(-c6ccc(O)cc6)oc45)c3)oc2c1	SARS-CoV	ChEMBL	30200		32000
AMENTOFLAVONE	5281600	357	-10.1	CHEMBL63354	experimental	Inhibition	Small molecular drug	O=c1cc(-c2ccc(O)c(-c3c(O)cc(O)c4c(=O)cc(-c5ccc(O)cc5)oc34)c2)oc2cc(O)cc(O)c12	SARS-CoV	ChEMBL			8300
CHEMBL1277228	49870841	175	-9.9	CHEMBL1277228	experimental	Inhibition	Small molecular drug	O=C(O)c1ccc(/C=C2\C(=O)N(c3cccc([N+](=O)[O-])c3)N=C2c2ccccc2)cc1	SARS-CoV	ChEMBL			8400
CHEMBL3809498	127045222	155	-9.8	50499691	experimental	Inhibitor	Small molecular drug	OC(=O)c1ccccc1-c1ccc(\C=C2/C(=O)N(N=C2c2ccccc2)c2ccc(cc2)C#N)o1	SARS-CoV	ChEMBL			18700
CHEMBL3809053	127045229	158	-9.8	50499694	experimental	Inhibitor	Small molecular drug	OC(=O)c1cccc(c1)N1N=C(\C(=C\c2ccc(cc2)-c2ccccc2)C1=O)c1ccccc1	SARS-CoV	ChEMBL			6700
CHEMBL227510	16728914	218	-9.8	CHEMBL227510	experimental	Inhibition	Small molecular drug	O=C1CSC(c2c(F)cccc2F)N1c1nc(-c2ccccc2)cc(-c2ccccc2)n1	SARS-CoV	ChEMBL		50
Baloxavir marboxil	124081896	10	-9.7	D0O5AG	Approved	Inhibitor	NA	COC(=O)OCOC1=C2C(=O)N3CCOCC3N(N2C=CC1=O)C4C5=C(CSC6=CC=CC=C46)C(=C(C=C5)F)F	Influenza virus infection	TTD
CHEMBL3809861	127043644	149	-9.7	50499685	experimental	Inhibitor	Small molecular drug	OC(=O)c1cccc(c1)N1N=C(\C(=C\c2ccc(o2)-c2ccccc2)C1=O)c1ccccc1	SARS-CoV	ChEMBL			6400
CHEMBL227509	16728912	217	-9.7	CHEMBL227509	experimental	Inhibition	Small molecular drug	O=C1CSC(c2c(Cl)cccc2Cl)N1c1nc(-c2ccccc2)cc(-c2ccccc2)n1	SARS-CoV	ChEMBL		50
CHEMBL376553	16728913	268	-9.7	CHEMBL376553	experimental	Inhibition	Small molecular drug	O=C1CSC(c2c(F)cccc2Cl)N1c1nc(-c2ccccc2)cc(-c2ccccc2)n1	SARS-CoV	ChEMBL		50
PHLOROFUCOFUROECKOL A	130976	326	-9.7	CHEMBL510508	experimental	Inhibition	Small molecular drug	Oc1cc(O)cc(Oc2c(O)cc(O)c3c2Oc2c(O)cc4oc5c(Oc6cc(O)cc(O)c6)c(O)cc(O)c5c4c2O3)c1	SARS-CoV	ChEMBL	10600		16700
3-(2-Benzo[1,3]dioxol-5-yl-3,5-dihydroxy-4-oxo-4H-chromen-7-yloxymethyl)-benzonitrile::CHEMBL551529	45271832	131	-9.6	50155226	experimental	Inhibitor	Small molecular drug	Oc1cc(OCc2cccc(c2)C#N)cc2oc(c(O)c(=O)c12)-c1ccc2OCOc2c1	SARS-CoV	ChEMBL			8100
CHEMBL3808658	127043455	145	-9.6	50499681	experimental	Inhibitor	Small molecular drug	OC(=O)c1ccc(Cl)cc1-c1ccc(\C=C2/C(=O)N(N=C2c2ccccc2)c2ccc(F)cc2)o1	SARS-CoV	ChEMBL			20200
CHEMBL1277135	52949213	172	-9.6	CHEMBL1277135	experimental	Inhibition	Small molecular drug	O=C(O)c1ccc(/C=C2\C(=O)N(c3cccc(Cl)c3)N=C2c2ccccc2)cc1	SARS-CoV	ChEMBL			10800
CHEMBL540403	45266482	339	-9.6	CHEMBL540403	experimental	Inhibition	Small molecular drug	CCN1C(c2ccccc2)=C(c2ccccc2)S/C1=C/C=C/c1sc2c3ccccc3ccc2[n+]1CC.[Cl-]	SARS-CoV	ChEMBL			3800
(2S)-N,N'-bis[(1S)-1-[(2-chloro-4-nitrophenyl)carbamoyl]-2-phenylethyl]-2-hydroxybutanediamide::Anilide Inhibitor 5b::Bis-anilide	11491101	28	-9.5	19486	experimental	Inhibitor	Small molecular drug	O[C@@H](CC(=O)N[C@@H](Cc1ccccc1)C(=O)Nc1ccc(cc1Cl)[N+]([O-])=O)C(=O)N[C@@H](Cc1ccccc1)C(=O)Nc1ccc(cc1Cl)[N+]([O-])=O	SARS-CoV	BindingDB	3100		4000
2-Benzo[1,3]dioxol-5-yl-7-(3-chloro-benzyloxy)-3,5-dihydroxy-chromen-4-one::CHEMBL560933	45268452	126	-9.5	50155214	experimental	Inhibitor	Small molecular drug	Oc1cc(OCc2cccc(Cl)c2)cc2oc(c(O)c(=O)c12)-c1ccc2OCOc2c1	SARS-CoV	ChEMBL			15400
CHEMBL3809329	127043641	146	-9.5	50499682	experimental	Inhibitor	Small molecular drug	CC(C)c1ccc(cc1)N1N=C(\C(=C\c2ccc(o2)-c2cc(Cl)ccc2C(O)=O)C1=O)c1ccccc1	SARS-CoV	ChEMBL			6000
CHEMBL3809579	127045221	154	-9.5	50499690	experimental	Inhibitor	Small molecular drug	CC(C)(C)c1ccc(cc1)N1N=C(\C(=C\c2ccc(o2)-c2ccccc2C(O)=O)C1=O)c1ccccc1	SARS-CoV	ChEMBL			8600
CHEMBL3099528	73057091	239	-9.5	CHEMBL3099528	experimental	Inhibition	Small molecular drug	CC1CCN(S(=O)(=O)c2ccc3c(c2)C(=O)C(=O)N3Cc2ccc3ccccc3c2)CC1	SARS-CoV	ChEMBL			17820
CHEMBL3105075	46784066	263	-9.5	CHEMBL3105075	experimental	Inhibition	Small molecular drug	C(=C/c1ccccc1)\C[N+]1(C/C=C/c2ccccc2)CCN(C(c2ccccc2)c2ccccc2)CC1	SARS-CoV	ChEMBL			28300
Rifampin	6243627	15	-9.4	D0G3DL	Approved	Inhibitor	Small molecular drug	CC1C=CC=C(C(=O)NC2=C(C3=C(C4=C(C(=C3O)C)OC(C4=O)(OC=CC(C(C(C(C(C(C1O)C)O)C)OC(=O)C)C)OC)C)C(=O)C2=CNN5CCN(CC5)C)O)C	Tuberculosis; Clostridium difficile associated diarrhea	TTD
AG7088 analogue 4a::ethyl (2E,4S)-4-[(2S)-3-(4-fluorophenyl)-2-[(2S)-3-methyl-2-[(5-methyl-1,2-oxazol-3-yl)formamido]butanamido]propanamido]-5-phenylpent-2-enoate	15959298	40	-9.4	19500	experimental	Inhibitor	Small molecular drug	CCOC(=O)\C=C\[C@H](Cc1ccccc1)NC(=O)[C@H](Cc1ccc(F)cc1)NC(=O)[C@@H](NC(=O)c1cc(C)on1)C(C)C	SARS-CoV	BindingDB			21000
CHEMBL3810058	127043643	148	-9.4	50499684	experimental	Inhibitor	Small molecular drug	O=C1N(N=C(\C1=C\c1ccc(o1)-c1ccccc1)c1ccccc1)c1ccccc1	SARS-CoV	ChEMBL			>50000
CHEMBL3810325	102341659	152	-9.4	50499688	experimental	Inhibitor	Small molecular drug	OC(=O)c1ccccc1-c1ccc(\C=C2/C(=O)N(N=C2c2ccccc2)c2ccc(F)cc2)o1	SARS-CoV	ChEMBL			37500
CHEMBL1277944	52947200	183	-9.4	CHEMBL1277944	experimental	Inhibition	Small molecular drug	O=C(O)c1ccc(/C=C2\C(=O)N(c3ccccc3)N=C2c2ccccc2)cc1	SARS-CoV	ChEMBL			18000
CHEMBL478119	16061499	303	-9.4	CHEMBL478119	experimental	Inhibition	Small molecular drug	CCN1/C(=C\C=C\C2=C/C(=C/c3sc4ccccc4[n+]3CC)CC(C)C2)Sc2ccccc21	SARS-CoV	ChEMBL			2000
CHEMBL558828	45266488	354	-9.4	CHEMBL558828	experimental	Inhibition	Small molecular drug	CCC(=C\c1sc2cc(C)c(C)cc2[n+]1CC)/C=C1/Sc2cc(/C=C/c3ccccc3)ccc2N1CC.[Cl-]	SARS-CoV	ChEMBL			6600
(2S)-N-[(1S)-1-{[(1S,2S)-1-{[(1S)-1-[(2-chloro-4-nitrophenyl)carbamoyl]-2-phenylethyl]carbamoyl}-2-hydroxypropyl]carbamoyl}-2-phenylethyl]-3-methyl-2-[(5-methyl-1,2-oxazol-3-yl)formamido]butanamide::Anilide Inhibitor 4j::N-[(5-methylisoxazol-3-yl)carbonyl]-L-valyl-L-phenylalanyl-L-threonyl-N-(2-chloro-4-nitrophenyl)-L-phenylalaninamide	15959316	26	-9.3	19484	experimental	Inhibitor	Small molecular drug	CC(C)[C@H](NC(=O)c1cc(C)on1)C(=O)N[C@@H](Cc1ccccc1)C(=O)N[C@@H](C(C)O)C(=O)N[C@@H](Cc1ccccc1)C(=O)Nc1ccc(cc1Cl)[N+]([O-])=O	SARS-CoV	BindingDB	1610		5000
7-(3-Chloro-benzyloxy)-2-(3,4-dihydroxy-phenyl)-3,5-dihydroxy-chromen-4-one::CHEMBL551130	45271826	129	-9.3	50155222	experimental	Inhibitor	Small molecular drug	Oc1ccc(cc1O)-c1oc2cc(OCc3cccc(Cl)c3)cc(O)c2c(=O)c1O	SARS-CoV	ChEMBL			5200
CHEMBL3808795	127045393	142	-9.3	50499678	experimental	Inhibitor	Small molecular drug	OC(=O)c1cccc(c1)N1N=C(\C(=C\c2ccc(o2)-c2cc(Cl)ccc2C(O)=O)C1=O)c1ccccc1	SARS-CoV	ChEMBL			44700
CHEMBL3810328	102341658	144	-9.3	50499680	experimental	Inhibitor	Small molecular drug	OC(=O)c1ccc(Cl)cc1-c1ccc(\C=C2/C(=O)N(N=C2c2ccccc2)c2ccccc2)o1	SARS-CoV	ChEMBL			16400
CHEMBL3099546	73056765	257	-9.3	CHEMBL3099546	experimental	Inhibition	Small molecular drug	CN1CCN(S(=O)(=O)c2ccc3c(c2)C(=O)C(=O)N3Cc2ccc3ccccc3c2)CC1	SARS-CoV	ChEMBL			82910
DIECKOL	3008868	325	-9.3	CHEMBL508791	experimental	Inhibition	Small molecular drug	Oc1cc(O)cc(Oc2c(O)cc(O)c3c2Oc2c(O)cc(Oc4c(O)cc(Oc5c(O)cc(O)c6c5Oc5c(O)cc(O)cc5O6)cc4O)cc2O3)c1	SARS-CoV	ChEMBL	2400	60	2700
PRISTIMERIN	159516	342	-9.3	CHEMBL54804	experimental	Inhibition	Small molecular drug	COC(=O)[C@]1(C)CC[C@]2(C)CC[C@]3(C)C4=CC=C5C(=CC(=O)C(O)=C5C)[C@]4(C)CC[C@@]3(C)[C@@H]2C1	SARS-CoV	ChEMBL	3100		5500
3-benzyl-1-[(6,7-dimethyl-2-oxo-1,2-dihydroquinolin-3-yl)methyl]-1-[2-(2-methylphenyl)ethyl]urea::Compound PJ169	3194487	97	-9.2	42405	experimental	Inhibitor	Small molecular drug	Cc1ccccc1CCN(Cc1cc2cc(C)c(C)cc2[nH]c1=O)C(=O)NCc1ccccc1	SARS-CoV	BindingDB			17200
3-[2-(3,4-Dihydroxy-phenyl)-3,5-dihydroxy-4-oxo-4H-chromen-7-yloxymethyl]-benzonitrile::CHEMBL551131	44517748	127	-9.2	50155218	experimental	Inhibitor	Small molecular drug	Oc1ccc(cc1O)-c1oc2cc(OCc3cccc(c3)C#N)cc(O)c2c(=O)c1O	SARS-CoV	ChEMBL			2700
7-(4-Chloro-benzyloxy)-2-(3,4-dihydroxy-phenyl)-3,5-dihydroxy-chromen-4-one::CHEMBL550256	45270979	130	-9.2	50155225	experimental	Inhibitor	Small molecular drug	Oc1ccc(cc1O)-c1oc2cc(OCc3ccc(Cl)cc3)cc(O)c2c(=O)c1O	SARS-CoV	ChEMBL			4100
CHEMBL3810361	127043645	151	-9.2	50499687	experimental	Inhibitor	Small molecular drug	OC(=O)c1ccccc1-c1ccc(\C=C2/C(=O)N(N=C2c2ccccc2)c2ccccc2)o1	SARS-CoV	ChEMBL			41200
CHEMBL3809506	127045220	153	-9.2	50499689	experimental	Inhibitor	Small molecular drug	CC(C)c1ccc(cc1)N1N=C(\C(=C\c2ccc(o2)-c2ccccc2C(O)=O)C1=O)c1ccccc1	SARS-CoV	ChEMBL			11700
CHEMBL541163	45266425	340	-9.2	CHEMBL541163	experimental	Inhibition	Small molecular drug	CCN1/C(=C\C=C\c2sc3ccc(-c4nc5ccccc5s4)cc3[n+]2CC)Sc2ccc(-c3nc4ccccc4s3)cc21.[Cl-]	SARS-CoV	ChEMBL			2500
2-({4-[3-(2,4-dichlorophenyl)-1,2-oxazol-5-yl]pyrimidin-2-yl}sulfanyl)-N-[4-(trifluoromethyl)phenyl]acetamide::pyrimidine-containing compound 7	2745640	55	-9.1	19515	experimental	Inhibitor	Small molecular drug	FC(F)(F)c1ccc(NC(=O)CSc2nccc(n2)-c2cc(no2)-c2ccc(Cl)cc2Cl)cc1	SARS-CoV	BindingDB			15000
Benzotriazole ester, 9	15959241	104	-9.1	111455	experimental	Inhibitor	Small molecular drug	O=C(On1nnc2ccccc12)c1cc2ccccc2[nH]1	SARS-CoV	BindingDB	12.3
CHEMBL3808427	127043642	147	-9.1	50499683	experimental	Inhibitor	Small molecular drug	CC(C)(C)c1ccc(cc1)N1N=C(\C(=C\c2ccc(o2)-c2cc(Cl)ccc2C(O)=O)C1=O)c1ccccc1	SARS-CoV	ChEMBL			5800
CHEMBL3809926	127045386	159	-9.1	50499695	experimental	Inhibitor	Small molecular drug	OC(=O)c1cccc(c1)N1N=C(\C(=C\c2ccc(OCc3ccccc3)cc2)C1=O)c1ccccc1	SARS-CoV	ChEMBL			15700
CHEMBL1277227	49870842	174	-9.1	CHEMBL1277227	experimental	Inhibition	Small molecular drug	O=C(O)c1ccc(/C=C2\C(=O)N(c3ccc(F)cc3)N=C2c2ccccc2)cc1	SARS-CoV	ChEMBL			6800
CHEMBL1278030	52945981	185	-9.1	CHEMBL1278030	experimental	Inhibition	Small molecular drug	O=C1/C(=C\c2cccc([N+](=O)[O-])c2)C(c2ccccc2)=NN1c1ccccc1	SARS-CoV	ChEMBL
CHEMBL3099535	73056464	246	-9.1	CHEMBL3099535	experimental	Inhibition	Small molecular drug	O=C1Nc2ccc(S(=O)(=O)N3CCN(c4cccc(C(F)(F)F)c4)CC3)cc2C1=O	SARS-CoV	ChEMBL			100000
CHEMBL3099536	73056465	247	-9.1	CHEMBL3099536	experimental	Inhibition	Small molecular drug	O=C1Nc2ccc(S(=O)(=O)N3CCN(Cc4cccc(Cl)c4)CC3)cc2C1=O	SARS-CoV	ChEMBL			31710
CHEMBL456228	10480940	297	-9.1	CHEMBL456228	experimental	Inhibition	Small molecular drug	Oc1cc(O)cc(Oc2c(O)cc(O)c3c2Oc2c(O)cc(Oc4c(O)cc(O)cc4O)cc2O3)c1	SARS-CoV	ChEMBL	19300		42100
CHEMBL508525	11604691	324	-9.1	CHEMBL508525	experimental	Inhibition	Small molecular drug	O=C(NN1C(=O)CSC1c1ccccc1F)c1cc(-c2ccc(F)cc2F)ccc1O	SARS-CoV	ChEMBL		50
CHEMBL3810109	127045387	140	-9	50499676	experimental	Inhibitor	Small molecular drug	OC(=O)c1cccc(c1)N1N=C(\C(=C\c2ccc(o2)-c2cc(Cl)ccc2C(O)=O)C1=O)C(F)(F)F	SARS-CoV	ChEMBL			>50000
CHEMBL1278125	52941131	188	-9	CHEMBL1278125	experimental	Inhibition	Small molecular drug	O=C(O)c1ccc(/C=C2\C(=O)N(c3ccc(Cl)cc3)N=C2c2ccccc2)cc1	SARS-CoV	ChEMBL			13900
CHEMBL1278212	52947189	189	-9	CHEMBL1278212	experimental	Inhibition	Small molecular drug	CC(=O)Nc1ccc(/C=C2\C(=O)N(c3ccc(Cl)cc3)N=C2c2ccccc2)cc1	SARS-CoV	ChEMBL
CHEMBL3099530	73057388	241	-9	CHEMBL3099530	experimental	Inhibition	Small molecular drug	CC1CC(C)CN(S(=O)(=O)c2ccc3c(c2)C(=O)C(=O)N3Cc2ccccc2)C1	SARS-CoV	ChEMBL			4700
CHEMBL470323	44562940	299	-9	CHEMBL470323	experimental	Inhibition	Small molecular drug	O=C1CSC(c2ccc(-c3ccnc4ccccc34)cc2)N1c1ccccn1	SARS-CoV	ChEMBL		50
Rifapentine	135659016	16	-8.9	D0G9IU	Approved	Binder	Small molecular drug	CC1C=CC=C(C(=O)NC2=C(C3=C(C4=C(C(=C3O)C)OC(C4=O)(OC=CC(C(C(C(C(C(C1O)C)O)C)OC(=O)C)C)OC)C)C(=C2C=NN5CCN(CC5)C6CCCC6)O)O)C	Tuberculosis; Macular degeneration	TTD
(2S)-N-[(1S)-1-{[(1S)-1-[(2-chloro-4-nitrophenyl)carbamoyl]-2-phenylethyl]carbamoyl}-2-phenylethyl]-3-methyl-2-(thiophen-2-ylformamido)butanamide::Anilide Inhibitor 3p::N-(thien-2-ylcarbonyl)-L-valyl-L-phenylalanyl-N-(2-chloro-4-nitrophenyl)-L-phenylalaninamide	11227702	25	-8.9	19483	experimental	Inhibitor	Small molecular drug	CC(C)[C@H](NC(=O)c1cccs1)C(=O)N[C@@H](Cc1ccccc1)C(=O)N[C@@H](Cc1ccccc1)C(=O)Nc1ccc(cc1Cl)[N+]([O-])=O	SARS-CoV	BindingDB	4300		5000
dipeptidomimetic unsaturated ester 18a::ethyl (2E,4S)-4-({N-[(2E)-3-(1,1-biphenyl-4-yl)prop-2-enoyl]-L-phenylalanyl}amino)-5-phenylpent-2-enoate::ethyl (2E,4S)-5-phenyl-4-[(2S)-3-phenyl-2-[(2E)-3-(4-phenylphenyl)prop-2-enamido]propanamido]pent-2-enoate	15959302	44	-8.9	19504	experimental	Inhibitor	Small molecular drug	CCOC(=O)\C=C\[C@H](Cc1ccccc1)NC(=O)[C@H](Cc1ccccc1)NC(=O)\C=C\c1ccc(cc1)-c1ccccc1	SARS-CoV	BindingDB	6440		10000
dipeptidomimetic unsaturated ester 18e::ethyl (2E,4S)-4-({N-[(2E)-3-(1,3-benzodioxol-5-yl)prop-2-enoyl]-L-phenylalanyl}amino)-5-phenylpent-2-enoate::ethyl (2E,4S)-4-[(2S)-2-[(2E)-3-(2H-1,3-benzodioxol-5-yl)prop-2-enamido]-3-phenylpropanamido]-5-phenylpent-2-enoate	23645527	48	-8.9	19508	experimental	Inhibitor	Small molecular drug	CCOC(=O)\C=C\[C@H](Cc1ccccc1)NC(=O)[C@H](Cc1ccccc1)NC(=O)\C=C\c1ccc2OCOc2c1	SARS-CoV	BindingDB	3046		7000
2-Benzo[1,3]dioxol-5-yl-7-(4-chloro-benzyloxy)-3,5-dihydroxy-chromen-4-one::CHEMBL551334	45271831	134	-8.9	50155230	experimental	Inhibitor	Small molecular drug	Oc1cc(OCc2ccc(Cl)cc2)cc2oc(c(O)c(=O)c12)-c1ccc2OCOc2c1	SARS-CoV	ChEMBL			9300
CHEMBL3808558	127045392	141	-8.9	50499677	experimental	Inhibitor	Small molecular drug	OC(=O)c1cccc(c1)N1N=C(\C(=C/c2ccc(o2)-c2ccccc2C(O)=O)C1=O)C(F)(F)F	SARS-CoV	ChEMBL			>50000
IGUESTERIN	46881919	160	-8.9	CHEMBL1092796	experimental	Inhibition	Small molecular drug	CC1=CC[C@]2(C)CC[C@]3(C)C4=CC=C5C(=CC(=O)C(O)=C5C)[C@]4(C)CC[C@@]3(C)[C@@H]2C1	SARS-CoV	ChEMBL			2600
DIHYDROCELASTROL	10411574	161	-8.9	CHEMBL1092797	experimental	Inhibition	Small molecular drug	Cc1c(O)c(O)cc2c1CC=C1[C@@]3(C)CC[C@@]4(C)CC[C@@](C)(C(=O)O)C[C@H]4[C@]3(C)CC[C@]12C	SARS-CoV	ChEMBL			21700
CHEMBL3099525	73057088	236	-8.9	CHEMBL3099525	experimental	Inhibition	Small molecular drug	O=C1C(=O)N(Cc2ccc3ccccc3c2)c2ccc(S(=O)(=O)N3CCOCC3)cc21	SARS-CoV	ChEMBL			39870
CHEMBL3099547	73056766	258	-8.9	CHEMBL3099547	experimental	Inhibition	Small molecular drug	CN1C(=O)C(=O)c2cc(S(=O)(=O)N3CCN(CCc4ccccc4)CC3)ccc21	SARS-CoV	ChEMBL			13860
Rifamycin	6324616	9	-8.8	D0FX2Q	Approved	Modulator, Inhibitor	Small molecular drug	CC(C)(C(=O)NC(CC1=CNC2=CC=CC=C21)C(=O)NC(CC3=CNC4=CC=CC=C43)NC=O)N	Diarrhea; Infectious disease; Hepatitis C virus infection; Head and neck cancer;	TTD
Anilide Inhibitor 4k::N-[(benzyloxy)carbonyl]-L-valyl-L-phenylalanyl-L-threonyl-N-(2-chloro-4-nitrophenyl)-L-phenylalaninamide::benzyl N-[(1S)-1-{[(1S)-1-{[(1S,2S)-1-{[(1S)-1-[(2-chloro-4-nitrophenyl)carbamoyl]-2-phenylethyl]carbamoyl}-2-hydroxypropyl]carbamoyl}-2-phenylethyl]carbamoyl}-2-methylpropyl]carbamate	15959317	27	-8.8	19485	experimental	Inhibitor	Small molecular drug	CC(C)[C@H](NC(=O)OCc1ccccc1)C(=O)N[C@@H](Cc1ccccc1)C(=O)N[C@@H](C(C)O)C(=O)N[C@@H](Cc1ccccc1)C(=O)Nc1ccc(cc1Cl)[N+]([O-])=O	SARS-CoV	BindingDB	1510		6000
2-{[5-cyano-4-(3-methoxyphenyl)-6-oxo-1,6-dihydropyrimidin-2-yl]sulfanyl}-N-(4-nitrophenyl)acetamide::pyrimidinone-containing compound 23	2918926	71	-8.8	19531	experimental	Inhibitor	Small molecular drug	COc1cccc(c1)-c1nc(SCC(=O)Nc2ccc(cc2)[N+]([O-])=O)[nH]c(=O)c1C#N	SARS-CoV	BindingDB			300000
CHEMBL1276959	52943505	169	-8.8	CHEMBL1276959	experimental	Inhibition	Small molecular drug	CC(C)(C)c1ccc(N2N=C(c3ccccc3)/C(=C/c3ccc(C(=O)O)cc3)C2=O)cc1	SARS-CoV	ChEMBL
CHEMBL1277866	52941137	182	-8.8	CHEMBL1277866	experimental	Inhibition	Small molecular drug	CC(=O)Nc1ccc(/C=C2\C(=O)N(c3ccccc3)N=C2c2ccccc2)cc1	SARS-CoV	ChEMBL
CHEMBL1774326	1265413	204	-8.8	CHEMBL1774326	experimental	Inhibition	Small molecular drug	O=C(CSc1ncnc2c1sc1nc(N3CCOCC3)c3c(c12)CCCC3)NCc1ccco1	SARS-CoV	ChEMBL		53.27	90720
CHEMBL3099521	73057087	232	-8.8	CHEMBL3099521	experimental	Inhibition	Small molecular drug	CN1C(=O)C(=O)c2cc(S(=O)(=O)N3CCN(c4ccccn4)CC3)ccc21	SARS-CoV	ChEMBL			5520
5-amino-2-methyl-N-[(1R)-1-naphthalen-1-ylethyl]benzamide	24941262	4	-8.7	DB08656	experimental	inhibitor	Small molecular drug	[H][C@](C)(NC(=O)C1=C(C)C=CC(N)=C1)C1=CC=CC2=C1C=CC=C2	SARS-CoV	DrugBank
N-(4-chlorophenyl)-2-[(4-{5-[1-methyl-5-(trifluoromethyl)-1H-pyrazol-3-yl]thiophen-2-yl}pyrimidin-2-yl)sulfanyl]acetamide::pyrimidine-containing compound 2	2821293	50	-8.7	19510	experimental	Inhibitor	Small molecular drug	Cn1nc(cc1C(F)(F)F)-c1ccc(s1)-c1ccnc(SCC(=O)Nc2ccc(Cl)cc2)n1	SARS-CoV	BindingDB			10000
2-{[5-cyano-4-(3-methoxyphenyl)-6-oxo-1,6-dihydropyrimidin-2-yl]sulfanyl}-N-(4-sulfamoylphenyl)acetamide::CHEMBL210497::pyrimidinone-containing compound 10	2292729	58	-8.7	19518	experimental	Inhibitor	Small molecular drug	COc1cccc(c1)-c1nc(SCC(=O)Nc2ccc(cc2)S(N)(=O)=O)[nH]c(=O)c1C#N	SARS-CoV	BindingDB			40000
CHEMBL3809059	127045227	156	-8.7	50499692	experimental	Inhibitor	Small molecular drug	COc1ccc(cc1)N1N=C(\C(=C\c2ccc(o2)-c2ccccc2C(O)=O)C1=O)c1ccccc1	SARS-CoV	ChEMBL			30700
CHEMBL1276871	52945913	167	-8.7	CHEMBL1276871	experimental	Inhibition	Small molecular drug	COc1ccc(N2N=C(c3ccccc3)/C(=C/c3ccc(C(=O)O)cc3)C2=O)cc1	SARS-CoV	ChEMBL			12000
CHEMBL1277046	49870840	170	-8.7	CHEMBL1277046	experimental	Inhibition	Small molecular drug	N#Cc1ccc(N2N=C(c3ccccc3)/C(=C/c3ccc(C(=O)O)cc3)C2=O)cc1	SARS-CoV	ChEMBL			5500
CHEMBL1277865	15263288	181	-8.7	CHEMBL1277865	experimental	Inhibition	Small molecular drug	COc1cccc(/C=C2\C(=O)N(c3ccccc3)N=C2c2ccccc2)c1	SARS-CoV	ChEMBL
CELASTROL	122724	231	-8.7	CHEMBL301982	experimental	Inhibition	Small molecular drug	CC1=C(O)C(=O)C=C2C1=CC=C1[C@@]3(C)CC[C@@]4(C)CC[C@@](C)(C(=O)O)C[C@H]4[C@]3(C)CC[C@@]21C	SARS-CoV	ChEMBL	4200		10300
CHEMBL3099543	76320984	254	-8.7	CHEMBL3099543	experimental	Inhibition	Small molecular drug	CC1CC(C)CN(S(=O)(=O)c2ccc3c(c2)C(=O)C(=O)N3)C1	SARS-CoV	ChEMBL			4300
(2S)-N-[(1S)-1-{[(1S)-1-[(2-chloro-4-nitrophenyl)carbamoyl]-2-phenylethyl]carbamoyl}-2-phenylethyl]-3-methyl-2-[(5-methyl-1,2-oxazol-3-yl)formamido]butanamide::Anilide Inhibitor 3o::N-[(5-methylisoxazol-3-yl)carbonyl]-L-valyl-L-phenylalanyl-N-(2-chloro-4-nitrophenyl)-L-phenylalaninamide	85426836	24	-8.6	19482	experimental	Inhibitor	Small molecular drug	CC(C)C(NC(=O)c1cc(C)[o+][n-]1)C(=O)NC(Cc1ccccc1)C(=O)NC(Cc1ccccc1)C(=O)Nc1ccc(cc1Cl)[N+]([O-])=O	SARS-CoV	BindingDB	2900		7000
2-[(5-cyano-6-oxo-4-phenyl-1,6-dihydropyrimidin-2-yl)sulfanyl]-N-[3-(trifluoromethyl)phenyl]acetamide::pyrimidinone-containing compound 20	2167624	68	-8.6	19528	experimental	Inhibitor	Small molecular drug	FC(F)(F)c1cccc(NC(=O)CSc2nc(-c3ccccc3)c(C#N)c(=O)[nH]2)c1	SARS-CoV	BindingDB			200000
N-(4-chlorophenyl)-2-[(5-cyano-6-oxo-4-phenyl-1,6-dihydropyrimidin-2-yl)sulfanyl]propanamide::pyrimidinone-containing compound 24	2946678	72	-8.6	19532	experimental	Inhibitor	Small molecular drug	CC(Sc1nc(-c2ccccc2)c(C#N)c(=O)[nH]1)C(=O)Nc1ccc(Cl)cc1	SARS-CoV	BindingDB			300000
N-(4-tert-butylphenyl)-2-[(5-cyano-4-cyclohexyl-6-oxo-1,6-dihydropyrimidin-2-yl)sulfanyl]acetamide::pyrimidinone-containing compound 25	2727994	73	-8.6	19533	experimental	Inhibitor	Small molecular drug	CC(C)(C)c1ccc(NC(=O)CSc2nc(C3CCCCC3)c(C#N)c(=O)[nH]2)cc1	SARS-CoV	BindingDB			350000
CHEMBL3810366	6026688	139	-8.6	50499675	experimental	Inhibitor	Small molecular drug	CC1=NN(C(=O)\C1=C/c1ccc(o1)-c1cc(Cl)ccc1C(O)=O)c1cccc(c1)C(O)=O	SARS-CoV	ChEMBL			>50000
CHEMBL3810010	127045394	143	-8.6	50499679	experimental	Inhibitor	Small molecular drug	CC1=NN(C(=O)\C1=C/c1ccc(o1)-c1cc(Cl)ccc1C(O)=O)c1ccccc1	SARS-CoV	ChEMBL			>50000
CHEMBL3809159	50885062	150	-8.6	50499686	experimental	Inhibitor	Small molecular drug	CC1=NN(C(=O)\C1=C/c1ccc(o1)-c1ccccc1)c1cccc(c1)C(O)=O	SARS-CoV	ChEMBL			>50000
CHEMBL1277047	52945915	171	-8.6	CHEMBL1277047	experimental	Inhibition	Small molecular drug	O=C(O)c1ccc(/C=C2\C(=O)N(c3ccc(OC(F)(F)F)cc3)N=C2c2ccccc2)cc1	SARS-CoV	ChEMBL			42000
CHEMBL1774322	1328543	200	-8.6	CHEMBL1774322	experimental	Inhibition	Small molecular drug	Nc1nc(CSc2nnc(-c3cccc4ccccc34)n2-c2ccccc2)cs1	SARS-CoV	ChEMBL		58.23	58350
2-PHLOROECKOL	5320532	226	-8.6	CHEMBL2391423	experimental	Inhibition	Small molecular drug	Oc1cc(O)cc(Oc2c(Oc3c(O)cc(O)cc3O)cc(O)c3c2Oc2c(O)cc(O)cc2O3)c1	SARS-CoV	ChEMBL			13300
CHEMBL3099522	42624533	233	-8.6	CHEMBL3099522	experimental	Inhibition	Small molecular drug	O=C1C(=O)N(Cc2ccccc2)c2ccc(S(=O)(=O)N3CCCCC3)cc21	SARS-CoV	ChEMBL			14000
TINGENONE	101520	296	-8.6	CHEMBL432519	experimental	Inhibition	Small molecular drug	CC1=C(O)C(=O)C=C2C1=CC=C1[C@@]3(C)CC[C@@]4(C)CC(=O)[C@H](C)C[C@H]4[C@]3(C)CC[C@@]21C	SARS-CoV	ChEMBL	4000		9900
ECKOL	145937	301	-8.6	CHEMBL471187	experimental	Inhibition	Small molecular drug	Oc1cc(O)cc(Oc2c(O)cc(O)c3c2Oc2c(O)cc(O)cc2O3)c1	SARS-CoV	ChEMBL	8200		8800
Anilide Inhibitor 3d::tert-butyl N-[(1S)-1-{[(1S)-1-{[(1S)-1-[(2-chloro-4-nitrophenyl)carbamoyl]-2-phenylethyl]carbamoyl}-3-methylbutyl]carbamoyl}-2-methylpropyl]carbamate	11262151	22	-8.5	19480	experimental	Inhibitor	Small molecular drug	CC(C)C[C@H](NC(=O)[C@@H](NC(=O)OC(C)(C)C)C(C)C)C(=O)N[C@@H](Cc1ccccc1)C(=O)Nc1ccc(cc1Cl)[N+]([O-])=O	SARS-CoV	BindingDB			>10000
2-{[5-cyano-4-(3-methoxyphenyl)-6-oxo-1,6-dihydropyrimidin-2-yl]sulfanyl}-N-(3-acetylphenyl)butanamide::pyrimidinone-containing compound 14	2918614	62	-8.5	19522	experimental	Inhibitor	Small molecular drug	CCC(Sc1nc(-c2cccc(OC)c2)c(C#N)c(=O)[nH]1)C(=O)Nc1cccc(c1)C(C)=O	SARS-CoV	BindingDB			60000
CHEMBL1276958	52948374	168	-8.5	CHEMBL1276958	experimental	Inhibition	Small molecular drug	CC(C)c1ccc(N2N=C(c3ccccc3)/C(=C/c3ccc(C(=O)O)cc3)C2=O)cc1	SARS-CoV	ChEMBL
CHEMBL1315054	2131982	192	-8.5	CHEMBL1315054	experimental	Inhibition	Small molecular drug	Cc1ccc(C(=O)N/C(=C\c2ccc(-c3ccccc3[N+](=O)[O-])o2)C(=O)NCCCN(C)C)cc1	SARS-CoV	ChEMBL	9930	81.43	41390
CHEMBL3099527	73057090	238	-8.5	CHEMBL3099527	experimental	Inhibition	Small molecular drug	CC1CCN(S(=O)(=O)c2ccc3c(c2)C(=O)C(=O)N3Cc2ccccc2)CC1	SARS-CoV	ChEMBL			1690
CHEMBL3099538	73056467	249	-8.5	CHEMBL3099538	experimental	Inhibition	Small molecular drug	O=C1Nc2ccc(S(=O)(=O)N3CCN(CCc4ccccc4)CC3)cc2C1=O	SARS-CoV	ChEMBL			34910
CHEMBL518593	5958938	330	-8.5	CHEMBL518593	experimental	Inhibition	Small molecular drug	C(\C1=C2Sc3ccccc3N2CC1)=C1/CC[n+]2c1sc1ccccc12	SARS-CoV	ChEMBL			10500
(2S)-N-(2-chloro-4-nitrophenyl)-2-{[4-(dimethylamino)phenyl]formamido}-3-phenylpropanamide::Anilide Inhibitor 2a::N-(2-chloro-4-nitrophenyl)-N-[4-(dimethylamino)benzoyl]-L-phenylalaninamide	11317290	21	-8.4	19479	experimental	Inhibitor	Small molecular drug	CN(C)c1ccc(cc1)C(=O)N[C@@H](Cc1ccccc1)C(=O)Nc1ccc(cc1Cl)[N+]([O-])=O	SARS-CoV	BindingDB	30		60
AG7088 analogue 1d::ethyl (2E,4S)-4-[(2R,5S)-2-benzyl-5-{[(benzyloxy)carbonyl]amino}-6-methyl-4-oxoheptanamido]-5-[(3S)-2-oxopyrrolidin-3-yl]pent-2-enoate	15959292	33	-8.4	19491	experimental	Inhibitor	Small molecular drug	CCOC(=O)\C=C\[C@H](C[C@@H]1CCNC1=O)NC(=O)[C@@H](CC(=O)[C@@H](NC(=O)OCc1ccccc1)C(C)C)Cc1ccccc1	SARS-CoV	BindingDB			>100000
N-[(benzyloxy)carbonyl]-O-(tert-butyl)-L-threonyl-3-cyclohexyl-N1-{(1S)-1-formyl-2-[(3S)-2-oxopyrrolidin-3-yl]ethyl}-L-alaninamide::TG-0205221::benzyl N-[(1S,2S)-2-(tert-butoxy)-1-{[(1S)-2-cyclohexyl-1-{[(2S)-1-oxo-3-[(3S)-2-oxopyrrolidin-3-yl]propan-2-yl]carbamoyl}ethyl]carbamoyl}propyl]carbamate	91895789	116	-8.4	200723	experimental	Inhibitor	Small molecular drug	C[C@H](OC(C)(C)C)[C@H](NC(=O)OCc1ccccc1)C(=O)N[C@@H](CC1CCCCC1)C(=O)N[C@@H](C[C@@H]1CCNC1=O)C=O	SARS-CoV	BindingDB	54
CHEMBL3809833	127045228	157	-8.4	50499693	experimental	Inhibitor	Small molecular drug	OC(=O)c1cccc(c1)N1N=C(\C(=C\c2ccco2)C1=O)c1ccccc1	SARS-CoV	ChEMBL			>50000
CHEMBL226272	16728906	215	-8.4	CHEMBL226272	experimental	Inhibition	Small molecular drug	Cc1cc(-c2ccccc2)nc(N2C(=O)CSC2c2c(Cl)cccc2Cl)n1	SARS-CoV	ChEMBL		50
CHEMBL3099534	73056463	245	-8.4	CHEMBL3099534	experimental	Inhibition	Small molecular drug	O=C1Nc2ccc(S(=O)(=O)N3CCN(c4ccc(F)cc4)CC3)cc2C1=O	SARS-CoV	ChEMBL			100000
CHEMBL3099545	73056764	256	-8.4	CHEMBL3099545	experimental	Inhibition	Small molecular drug	CN1CCN(S(=O)(=O)c2ccc3c(c2)C(=O)C(=O)N3Cc2ccccc2)CC1	SARS-CoV	ChEMBL			67200
CHEMBL390122	16728909	279	-8.4	CHEMBL390122	experimental	Inhibition	Small molecular drug	O=C1CSC(c2c(Cl)cccc2Cl)N1c1nc(-c2ccccc2)cc(C(F)(F)F)n1	SARS-CoV	ChEMBL		50
AG7088::CHEMBL20210::ethyl (2E,4S)-4-[((2R,5S)-2-(4-fluorobenzyl)-6-methyl-5-{[(5-methylisoxazol-3-yl)carbonyl]amino}-4-oxoheptanoyl)amino]-5-[(3S)-2-oxopyrrolidin-3-yl]pent-2-enoate::ethyl (2E,4S)-4-[(2R,5S)-2-[(4-fluorophenyl)methyl]-6-methyl-5-[(5-methyl-1,2-oxazol-3-yl)formamido]-4-oxoheptanamido]-5-[(3S)-2-oxopyrrolidin-3-yl]pent-2-enoate	6440352	30	-8.3	19488	experimental	Inhibitor	Small molecular drug	CCOC(=O)\C=C\[C@H](C[C@@H]1CCNC1=O)NC(=O)[C@@H](CC(=O)[C@@H](NC(=O)c1cc(C)on1)C(C)C)Cc1ccc(F)cc1	SARS-CoV	BindingDB			>100000
AG7088 analogue 4b::ethyl (2E,4S)-4-[(2S)-2-[(2S)-2-{[(benzyloxy)carbonyl]amino}-3-methylbutanamido]-3-(4-fluorophenyl)propanamido]-5-phenylpent-2-enoate	15959299	41	-8.3	19501	experimental	Inhibitor	Small molecular drug	CCOC(=O)\C=C\[C@H](Cc1ccccc1)NC(=O)[C@H](Cc1ccc(F)cc1)NC(=O)[C@@H](NC(=O)OCc1ccccc1)C(C)C	SARS-CoV	BindingDB			11000
AG7088 analogue 4c::ethyl (2E,4S)-4-[(2S)-2-[(2S)-3-methyl-2-[(5-methyl-1,2-oxazol-3-yl)formamido]butanamido]-3-phenylpropanamido]-5-phenylpent-2-enoate	15959300	42	-8.3	19502	experimental	Inhibitor	Small molecular drug	CCOC(=O)\C=C\[C@H](Cc1ccccc1)NC(=O)[C@H](Cc1ccccc1)NC(=O)[C@@H](NC(=O)c1cc(C)on1)C(C)C	SARS-CoV	BindingDB			30000
dipeptidomimetic unsaturated ester 18d::ethyl (2E,4S)-4-({N-[(2E)-3-(2,4-dimethoxyphenyl)prop-2-enoyl]-L-phenylalanyl}amino)-5-phenylpent-2-enoate::ethyl (2E,4S)-4-[(2S)-2-[(2E)-3-(2,4-dimethoxyphenyl)prop-2-enamido]-3-phenylpropanamido]-5-phenylpent-2-enoate	15959304	47	-8.3	19507	experimental	Inhibitor	Small molecular drug	CCOC(=O)\C=C\[C@H](Cc1ccccc1)NC(=O)[C@H](Cc1ccccc1)NC(=O)\C=C\c1ccc(OC)cc1OC	SARS-CoV	BindingDB	9049		10000
2-{[5-cyano-4-(3-methoxyphenyl)-6-oxo-1,6-dihydropyrimidin-2-yl]sulfanyl}-N-(4-acetylphenyl)acetamide::pyrimidinone-containing compound 13	2171126	61	-8.3	19521	experimental	Inhibitor	Small molecular drug	COc1cccc(c1)-c1nc(SCC(=O)Nc2ccc(cc2)C(C)=O)[nH]c(=O)c1C#N	SARS-CoV	BindingDB			60000
2-Benzo[1,3]dioxol-5-yl-3,5,7-trihydroxy-chromen-4-one::CHEMBL556501	45273625	133	-8.3	50155229	experimental	Inhibitor	Small molecular drug	Oc1cc(O)c2c(c1)oc(-c1ccc3OCOc3c1)c(O)c2=O	SARS-CoV	ChEMBL			>50000
CHEMBL1276870	136203765	166	-8.3	CHEMBL1276870	experimental	Inhibition	Small molecular drug	O=C1/C(=C\c2ccc(O)cc2)C(c2ccccc2)=NN1c1ccc(Cl)cc1	SARS-CoV	ChEMBL
CHEMBL1277136	52943127	173	-8.3	CHEMBL1277136	experimental	Inhibition	Small molecular drug	O=C(O)c1ccc(/C=C2\C(=O)N(c3ccc(Cl)c(Cl)c3)N=C2c2ccccc2)cc1	SARS-CoV	ChEMBL			24300
CHEMBL1278213	52945968	190	-8.3	CHEMBL1278213	experimental	Inhibition	Small molecular drug	COc1ccc(/C=C2\C(=O)N(c3ccc(Cl)cc3)N=C2c2ccccc2)cc1	SARS-CoV	ChEMBL
CHEMBL2441741	71544385	227	-8.3	CHEMBL2441741	experimental	Inhibition	Small molecular drug	CC(C)C[C@H](NC(=O)[C@H](Cc1cccc2ccccc12)NC(=O)OCc1ccccc1)C(=O)N[C@H](C=O)C[C@@H]1CCNC1=O	SARS-CoV	ChEMBL			230
CHEMBL3099524	4378077	235	-8.3	CHEMBL3099524	experimental	Inhibition	Small molecular drug	O=C1C(=O)N(Cc2ccccc2)c2ccc(S(=O)(=O)N3CCOCC3)cc21	SARS-CoV	ChEMBL			13860
CHEMBL3099539	73056760	250	-8.3	CHEMBL3099539	experimental	Inhibition	Small molecular drug	O=C1Nc2ccc(S(=O)(=O)N3CCN(C(=O)c4ccco4)CC3)cc2C1=O	SARS-CoV	ChEMBL			10070
CHEMBL3099540	73056761	251	-8.3	CHEMBL3099540	experimental	Inhibition	Small molecular drug	O=C1Nc2ccc(S(=O)(=O)N3CCN(c4ccccn4)CC3)cc2C1=O	SARS-CoV	ChEMBL			51330
CHEMBL389909	16728907	278	-8.3	CHEMBL389909	experimental	Inhibition	Small molecular drug	Cc1cc(-c2ccccc2)nc(N2C(=O)CSC2c2c(F)cccc2Cl)n1	SARS-CoV	ChEMBL		50
CHEMBL4208764	145967285	288	-8.3	CHEMBL4208764	experimental	Inhibition	Small molecular drug	CC(C)C[C@H](NC(=O)OC1(Cc2ccccc2)CCN(S(C)(=O)=O)CC1)C(=O)N[C@@H](C[C@@H]1CCNC1=O)C(O)S(=O)(=O)[O-].[Na+]	Middle East respiratory syndrome-related coronavirus (isolate UnitedKingdom/H123990006/2012) (Betacoronavirus England 1) (Humancoronavirus EMC)	ChEMBL			900
FUCODIPHLOROETHOL G	44590821	298	-8.3	CHEMBL459393	experimental	Inhibition	Small molecular drug	Oc1cc(O)c(Oc2cc(O)cc(O)c2Oc2cc(O)cc(O)c2-c2c(O)cc(O)cc2O)c(O)c1	SARS-CoV	ChEMBL			22500
CHEMBL479172	44584893	305	-8.3	CHEMBL479172	experimental	Inhibition	Small molecular drug	CCC(=C\c1sc2c3ccccc3ccc2[n+]1CC)/C=C1/Sc2cc(C)c(C)cc2N1CC	SARS-CoV	ChEMBL			5400
S-[5-(TRIFLUOROMETHYL)-4H-1,2,4-TRIAZOL-3-YL] 5-(PHENYLETHYNYL)FURAN-2-CARBOTHIOATE	2822496	3	-8.2	DB07743	experimental	inhibitor	Small molecular drug	FC(F)(F)C1=NN=C(N1)SC(=O)C1=CC=C(O1)C#CC1=CC=CC=C1	SARS-CoV	DrugBank
AG7088 analogue 2d::CHEMBL277716::N-[(benzyloxy)carbonyl]-L-valyl-N-((1S,2E)-4-ethoxy-4-oxo-1-{[(3S)-2-oxopyrrolidin-3-yl]methyl}but-2-enyl)-L-phenylalaninamide::TG-0205221 Analogue 2::ethyl (2E,4S)-4-[(2S)-2-[(2S)-2-{[(benzyloxy)carbonyl]amino}-3-methylbutanamido]-3-phenylpropanamido]-5-[(3S)-2-oxopyrrolidin-3-yl]pent-2-enoate	6478229	18	-8.2	19475	experimental	Inhibitor	Small molecular drug	CCOC(=O)\C=C\[C@H](C[C@@H]1CCNC1=O)NC(=O)[C@H](Cc1ccccc1)NC(=O)[C@@H](NC(=O)OCc1ccccc1)C(C)C	SARS-CoV	BindingDB	2260		85000
(2S)-N-[(1S)-1-[(2-chloro-4-nitrophenyl)carbamoyl]-2-phenylethyl]-4-methyl-2-[(2S)-3-methyl-2-(thiophen-2-ylformamido)butanamido]pentanamide::Anilide Inhibitor 3h::N-(thien-2-ylcarbonyl)-L-valyl-L-leucyl-N-(2-chloro-4-nitrophenyl)-L-phenylalaninamide	11467858	23	-8.2	19481	experimental	Inhibitor	Small molecular drug	CC(C)C[C@H](NC(=O)[C@@H](NC(=O)c1cccs1)C(C)C)C(=O)N[C@@H](Cc1ccccc1)C(=O)Nc1ccc(cc1Cl)[N+]([O-])=O	SARS-CoV	BindingDB	2290		5000
AG7088 analogue 3d::ethyl (2E,4S)-4-[(2R,5S)-2-benzyl-5-{[(benzyloxy)carbonyl]amino}-6-methyl-4-oxoheptanamido]-5-phenylpent-2-enoate	15959297	39	-8.2	19499	experimental	Inhibitor	Small molecular drug	CCOC(=O)\C=C\[C@H](Cc1ccccc1)NC(=O)[C@@H](CC(=O)[C@@H](NC(=O)OCc1ccccc1)C(C)C)Cc1ccccc1	SARS-CoV	BindingDB			38000
dipeptidomimetic unsaturated ester 18b::ethyl (2E,4S)-4-({N-[(2E)-3-(4-nitrophenyl)prop-2-enoyl]-L-phenylalanyl}amino)-5-phenylpent-2-enoate::ethyl (2E,4S)-4-[(2S)-2-[(2E)-3-(4-nitrophenyl)prop-2-enamido]-3-phenylpropanamido]-5-phenylpent-2-enoate	15959303	45	-8.2	19505	experimental	Inhibitor	Small molecular drug	CCOC(=O)\C=C\[C@H](Cc1ccccc1)NC(=O)[C@H](Cc1ccccc1)NC(=O)\C=C\c1ccc(cc1)N(=O)=O	SARS-CoV	BindingDB	2480		5000
N-(4-chlorophenyl)-2-{[4-(3-phenyl-1,2-oxazol-5-yl)pyrimidin-2-yl]sulfanyl}acetamide::pyrimidine-containing compound 6	2745617	54	-8.2	19514	experimental	Inhibitor	Small molecular drug	Clc1ccc(NC(=O)CSc2nccc(n2)-c2cc(no2)-c2ccccc2)cc1	SARS-CoV	BindingDB			15000
N-(4-chlorophenyl)-2-({4-[3-(2-chlorophenyl)-1,2-oxazol-5-yl]pyrimidin-2-yl}sulfanyl)acetamide::pyrimidine-containing compound 8	2745653	56	-8.2	19516	experimental	Inhibitor	Small molecular drug	Clc1ccc(NC(=O)CSc2nccc(n2)-c2cc(no2)-c2ccccc2Cl)cc1	SARS-CoV	BindingDB			15000
2-[(2-cyclohexylquinazolin-4-yl)sulfanyl]-N-(furan-2-ylmethyl)acetamide::Compound PJ07	1465905	96	-8.2	42404	experimental	Inhibitor	Small molecular drug	O=C(CSc1nc(nc2ccccc12)C1CCCCC1)NCc1ccco1	SARS-CoV	BindingDB			18200
CHEMBL1277782	5367170	179	-8.2	CHEMBL1277782	experimental	Inhibition	Small molecular drug	O=C1/C(=C\c2ccccc2)C(c2ccccc2)=NN1c1ccccc1	SARS-CoV	ChEMBL
KAYADIOL	52948928	180	-8.2	CHEMBL1277840	experimental	Inhibition	Small molecular drug	C=C1CC[C@H]2[C@](C)(CO)CCC[C@]2(C)[C@H]1CC/C(C)=C\CO	SARS-CoV	ChEMBL		75.2	137700
CHEMBL1277945	5759731	184	-8.2	CHEMBL1277945	experimental	Inhibition	Small molecular drug	CN(C)c1ccc(/C=C2\C(=O)N(c3ccccc3)N=C2c2ccccc2)cc1	SARS-CoV	ChEMBL
CHEMBL1278031	52947217	186	-8.2	CHEMBL1278031	experimental	Inhibition	Small molecular drug	O=C1/C(=C\c2ccccc2)C(c2ccccc2)=NN1c1ccc(Cl)cc1	SARS-CoV	ChEMBL
CHEMBL1278124	52950199	187	-8.2	CHEMBL1278124	experimental	Inhibition	Small molecular drug	O=C1/C(=C\c2ccc(Cl)cc2)C(c2ccccc2)=NN1c1ccc(Cl)cc1	SARS-CoV	ChEMBL
HESPERETIN	72281	282	-8.2	CHEMBL399121	experimental	Inhibition	Small molecular drug	COc1ccc([C@@H]2CC(=O)c3c(O)cc(O)cc3O2)cc1O	SARS-CoV	ChEMBL	24500		8300
CHEMBL4203883	145975081	285	-8.2	CHEMBL4203883	experimental	Inhibition	Small molecular drug	CC(C)C[C@H](NC(=O)OC1(Cc2ccccc2)CCN(C(=O)OC(C)(C)C)CC1)C(=O)N[C@@H](C[C@@H]1CCNC1=O)C(O)S(=O)(=O)[O-].[Na+]	Middle East respiratory syndrome-related coronavirus (isolate UnitedKingdom/H123990006/2012) (Betacoronavirus England 1) (Humancoronavirus EMC)	ChEMBL			700
CHEMBL522710	25072274	334	-8.2	CHEMBL522710	experimental	Inhibition	Small molecular drug	O=C(O)/C(O)=C/C(=O)c1cccc(NCc2ccc(Cl)cc2)c1	SARS-CoV	ChEMBL			11000
CHEMBL541707	45269765	341	-8.2	CHEMBL541707	experimental	Inhibition	Small molecular drug	CC(C)C[C@H](NC(=O)[C@@H](NC(=O)OCc1ccccc1)C(C)C)C(=O)N[C@@H](CCC(=O)c1nccs1)C(=O)c1nccs1	SARS-CoV	ChEMBL	45200
DIOXINODEHYDROECKOL	10429214	355	-8.2	CHEMBL559870	experimental	Inhibition	Small molecular drug	Oc1cc(O)c2oc3cc(O)c4oc5cc(O)cc(O)c5oc4c3oc2c1	SARS-CoV	ChEMBL			146500
AG7088 analogue 2b::ethyl (2E,4S)-4-[(2S)-2-[(2S)-2-{[(benzyloxy)carbonyl]amino}-3-methylbutanamido]-3-(4-fluorophenyl)propanamido]-5-[(3S)-2-oxopyrrolidin-3-yl]pent-2-enoate	15959293	34	-8.1	19493	experimental	Inhibitor	Small molecular drug	CCOC(=O)\C=C\[C@H](C[C@@H]1CCNC1=O)NC(=O)[C@H](Cc1ccc(F)cc1)NC(=O)[C@@H](NC(=O)OCc1ccccc1)C(C)C	SARS-CoV	BindingDB			>100000
4-[(3,5-dibromo-4-hydroxybenzene)sulfonyl]benzoic acid::Compound 1 analog 11	2775844	84	-8.1	19545	experimental	Inhibitor	Small molecular drug	OC(=O)c1ccc(cc1)S(=O)(=O)c1cc(Br)c(O)c(Br)c1	SARS-CoV	BindingDB			16000
2-[(3-Chloro-benzylamino)-methyl]-5,6-dihydroxy-chromen-4-one::CHEMBL560136	45268445	128	-8.1	50155220	experimental	Inhibitor	Small molecular drug	Oc1cc(CNCc2cccc(Cl)c2)oc2ccc(O)c(=O)c12	SARS-CoV	ChEMBL			>50000
2-[(4-Chloro-benzylamino)-methyl]-5,6-dihydroxy-chromen-4-one::CHEMBL549646	45270971	132	-8.1	50155228	experimental	Inhibitor	Small molecular drug	Oc1cc(CNCc2ccc(Cl)cc2)oc2ccc(O)c(=O)c12	SARS-CoV	ChEMBL			>50000
3-{[(5,6-Dihydroxy-4-oxo-4H-chromen-2-ylmethyl)-amino]-methyl}-benzonitrile::CHEMBL560392	45269292	135	-8.1	50155233	experimental	Inhibitor	Small molecular drug	Oc1cc(CNCc2cccc(c2)C#N)oc2ccc(O)c(=O)c12	SARS-CoV	ChEMBL			>50000
CHEMBL1774325::N-(1-{[2-(4-hydroxy-3,5-dimethoxybenzylidene)hydrazino]carbonyl}-2-phenylvinyl)benzamide	5341319	137	-8.1	50172847	experimental	Inhibitor	Small molecular drug	COc1cc(\C=N\NC(=O)C(\NC(=O)c2ccccc2)=C/c2ccccc2)cc(OC)c1O	SARS-CoV	ChEMBL			77090
HINOKIOL	12310492	176	-8.1	CHEMBL1277661	experimental	Inhibition	Small molecular drug	CC(C)c1cc2c(cc1O)[C@@]1(C)CC[C@H](O)C(C)(C)[C@@H]1CC2	SARS-CoV	ChEMBL			233400
TRIPHLORETHOL A	23427055	225	-8.1	CHEMBL2391422	experimental	Inhibition	Small molecular drug	Oc1cc(O)cc(Oc2c(O)cc(Oc3c(O)cc(O)cc3O)cc2O)c1	SARS-CoV	ChEMBL			164700
CHEMBL4202812	145976006	284	-8.1	CHEMBL4202812	experimental	Inhibition	Small molecular drug	CC(C)C[C@H](NC(=O)OC1(Cc2ccccc2)CCN(C(=O)OC(C)(C)C)CC1)C(=O)N[C@H](C=O)C[C@@H]1CCNC1=O	Feline coronavirus (strain FIPV WSU-79/1146) (FCoV)	ChEMBL			1600
CHEMBL492769	44593565	317	-8.1	CHEMBL492769	experimental	Inhibition	Small molecular drug	O=C(O)/C(O)=C/C(=O)c1ccc(OCc2ccc(Cl)cc2)cc1	SARS-CoV	ChEMBL			50000
CHEMBL492770	9882716	318	-8.1	CHEMBL492770	experimental	Inhibition	Small molecular drug	O=C(O)/C(O)=C/C(=O)c1cccc(OCc2ccccc2)c1	SARS-CoV	ChEMBL			50000
Remdesivir /IUPAC Name: 2-ethylbutyl (2S)-2-[[[(2R,3S,4R,5R)-5-(4-aminopyrrolo[2,1-f][1,2,4]triazin-7-yl)-5-cyano-3,4-dihydroxyoxolan-2-yl]methoxy-phenoxyphosphoryl]amino]propanoate	121304016	7	-8	DB14761/ CHEMBL4065616	Investigational	inhibitor	Small molecular drug	CCC(CC)COC(=O)[C@H](C)N[P@](=O)(OC[C@H]1O[C@](C#N)([C@H](O)[C@@H]1O)C1=CC=C2N1N=CN=C2N)OC1=CC=CC=C1	Zaire ebolavirus (strain Mayinga-76) SARS-CoV	DrugBank
Macrocycle derivative 14	136644752	12	-8	D03OIA	NA	Inhibitor	Small molecular drug	C1CNCCOC2=CC=CC(=C2)C3=CN=C4N3N=C(C=C4)NC1	Pain/Cyclin-dependent kinase inhibitors for cancer therapy:	TTD
AG7088 analogue 1c::CHEMBL194398::ethyl (2E,4S)-4-[(2R,5S)-2-benzyl-6-methyl-5-[(5-methyl-1,2-oxazol-3-yl)formamido]-4-oxoheptanamido]-5-[(3S)-2-oxopyrrolidin-3-yl]pent-2-enoate	11642725	32	-8	19490	experimental	Inhibitor	Small molecular drug	CCOC(=O)\C=C\[C@H](C[C@@H]1CCNC1=O)NC(=O)[C@@H](CC(=O)[C@@H](NC(=O)c1cc(C)on1)C(C)C)Cc1ccccc1	SARS-CoV	BindingDB			>100000
AG7088 analogue 3a::ethyl (2E,4S)-4-[(2R,5S)-2-[(4-fluorophenyl)methyl]-6-methyl-5-[(5-methyl-1,2-oxazol-3-yl)formamido]-4-oxoheptanamido]-5-phenylpent-2-enoate	15959294	36	-8	19496	experimental	Inhibitor	Small molecular drug	CCOC(=O)\C=C\[C@H](Cc1ccccc1)NC(=O)[C@@H](CC(=O)[C@@H](NC(=O)c1cc(C)on1)C(C)C)Cc1ccc(F)cc1	SARS-CoV	BindingDB			39000
5-[1-methyl-3-(trifluoromethyl)-1H-pyrazol-5-yl]-N-(3-methyl-4-nitro-1,2-oxazol-5-yl)thiophene-2-carboxamide::Compound 2 analog 16	3776668	88	-8	19550	experimental	Inhibitor	Small molecular drug	Cc1[n-][o+]c(NC(=O)c2ccc(s2)-c2cc(nn2C)C(F)(F)F)c1[N+]([O-])=O	SARS-CoV	BindingDB			5000
4-(3-(4-chlorobenzyloxy)phenyl)-2-hydroxy-4-oxobut-2-enoic acid::CHEMBL492771	91935361	122	-8	50151726	experimental	Inhibitor	Small molecular drug	OC(=O)C(=O)CC(=O)c1cccc(OCc2ccc(Cl)cc2)c1	SARS-CoV	ChEMBL			13600
METHYL DEHYDROABIETATE	14697	191	-8	CHEMBL12798	experimental	Inhibition	Small molecular drug	COC(=O)[C@]1(C)CCC[C@]2(C)c3ccc(C(C)C)cc3CC[C@H]21	SARS-CoV	ChEMBL		46.7	207000
CHEMBL3099542	73056762	253	-8	CHEMBL3099542	experimental	Inhibition	Small molecular drug	CC1CCCCN1S(=O)(=O)c1ccc2c(c1)C(=O)C(=O)N2	SARS-CoV	ChEMBL			2250
ALOE-EMODIN	10207	283	-8	CHEMBL40275	experimental	Inhibition	Small molecular drug	O=C1c2cccc(O)c2C(=O)c2c(O)cc(CO)cc21	SARS-CoV	ChEMBL			132000
CHEMBL492768	44511706	316	-8	CHEMBL492768	experimental	Inhibition	Small molecular drug	O=C(O)/C(O)=C/C(=O)c1ccc(OCc2ccccc2)cc1	SARS-CoV	ChEMBL			39900
DAIDZEIN	5281708	359	-8	CHEMBL8145	experimental	Inhibition	Small molecular drug	O=c1c(-c2ccc(O)cc2)coc2cc(O)ccc12	SARS-CoV	ChEMBL			105000
AG7088 analogue 2a::CHEMBL20636::N-[(5-methylisoxazol-3-yl)carbonyl]-L-valyl-N-((1S,2E)-4-ethoxy-4-oxo-1-{[(3S)-2-oxopyrrolidin-3-yl]methyl}but-2-enyl)-4-fluoro-L-phenylalaninamide::TG-0205221 Analogue 1::ethyl (2E,4S)-4-[(2S)-3-(4-fluorophenyl)-2-[(2S)-3-methyl-2-[(5-methyl-1,2-oxazol-3-yl)formamido]butanamido]propanamido]-5-[(3S)-2-oxopyrrolidin-3-yl]pent-2-enoate	6476897	17	-7.9	19474	experimental	Inhibitor		CCOC(=O)\C=C\[C@H](C[C@@H]1CCNC1=O)NC(=O)[C@H](Cc1ccc(F)cc1)NC(=O)[C@@H](NC(=O)c1cc(C)on1)C(C)C	SARS-CoV	BindingDB	>10000		>100000
AG7088 analogue 4d::ethyl (2E,4S)-4-[(2S)-2-[(2S)-2-{[(benzyloxy)carbonyl]amino}-3-methylbutanamido]-3-phenylpropanamido]-5-phenylpent-2-enoate	15959301	43	-7.9	19503	experimental	Inhibitor	Small molecular drug	CCOC(=O)\C=C\[C@H](Cc1ccccc1)NC(=O)[C@H](Cc1ccccc1)NC(=O)[C@@H](NC(=O)OCc1ccccc1)C(C)C	SARS-CoV	BindingDB			11000
dipeptidomimetic unsaturated ester 18c::ethyl (2E,4S)-4-[(2S)-2-[(2E)-3-[4-(dimethylamino)phenyl]prop-2-enamido]-3-phenylpropanamido]-5-phenylpent-2-enoate::ethyl (2E,4S)-4-[(N-{(2E)-3-[4-(dimethylamino)phenyl]prop-2-enoyl}-L-phenylalanyl)amino]-5-phenylpent-2-enoate	11555658	46	-7.9	19506	experimental	Inhibitor	Small molecular drug	CCOC(=O)\C=C\[C@H](Cc1ccccc1)NC(=O)[C@H](Cc1ccccc1)NC(=O)\C=C\c1ccc(cc1)N(C)C	SARS-CoV	BindingDB	520		1000
N-(3,4-dimethoxyphenyl)-2-[(4-hydroxy-6-phenylpyrimidin-2-yl)sulfanyl]acetamide::pyrimidine-containing compound 12	1128176	60	-7.9	19520	experimental	Inhibitor	Small molecular drug	COc1ccc(NC(=O)CSc2nc(cc(=O)[nH]2)-c2ccccc2)cc1OC	SARS-CoV	BindingDB			45000
N-[4-(4-chlorophenoxy)phenyl]-2-[(4-hydroxy-6-methylpyrimidin-2-yl)sulfanyl]acetamide::pyrimidine-containing compound 16	990824	64	-7.9	19524	experimental	Inhibitor	Small molecular drug	Cc1cc(=O)[nH]c(SCC(=O)Nc2ccc(Oc3ccc(Cl)cc3)cc2)n1	SARS-CoV	BindingDB			200000
2-[(4-hydroxy-5,6-dimethylpyrimidin-2-yl)sulfanyl]-N-(4-nitrophenyl)acetamide::pyrimidine-containing compound 28	2962669	76	-7.9	19536	experimental	Inhibitor	Small molecular drug	Cc1nc(SCC(=O)Nc2ccc(cc2)[N+]([O-])=O)[n-]c(=[OH+])c1C	SARS-CoV	BindingDB			>1000000
4,6-dimethyl-2-[(4-methylbenzene)sulfonyl]-5-nitropyridine-3-carbonitrile::Compound 1 analog 8::cid_2726176	2726176	81	-7.9	19542	experimental	Inhibitor	Small molecular drug	Cc1ccc(cc1)S(=O)(=O)c1nc(C)c(c(C)c1C#N)[N+]([O-])=O	SARS-CoV	BindingDB			13000
Benzotriazole ester, 7	15959239	102	-7.9	111453	experimental	Inhibitor	Small molecular drug	O=C(On1nnc2ccccc12)c1ccc2nc[nH]c2c1	SARS-CoV	BindingDB	22.9
Benzotriazole ester, 10	15959242	105	-7.9	111456	experimental	Inhibitor	Small molecular drug	Fc1ccc2[nH]c(cc2c1)C(=O)On1nnc2ccccc12	SARS-CoV	BindingDB	13.8
4-[(2,4-dimethyl-1,3-thiazol-5-yl)carbonyl]-3-hydroxy-1-[3-(4-morpholinyl)propyl]-5-(3-nitrophenyl)-1,5-dihydro-2H-pyrrol-2-one::CHEMBL1774324	91932451	136	-7.9	50172846	experimental	Inhibitor	Small molecular drug	Cc1nc(C)c(s1)C(=O)C1C(N(CCCN2CCOCC2)C(=O)C1=O)c1cccc(c1)[N+]([O-])=O	SARS-CoV	ChEMBL			101380
CHEMBL1350514	2131972	193	-7.9	CHEMBL1350514	experimental	Inhibition	Small molecular drug	Cc1ccc(C(=O)N/C(=C\c2ccc(-c3cccc([N+](=O)[O-])c3)o2)C(=O)NCCCN(C)C)cc1	SARS-CoV	ChEMBL	9110	82.59	38570
CHEMBL1774324	2951162	202	-7.9	CHEMBL1774324	experimental	Inhibition	Small molecular drug	Cc1nc(C)c(C(=O)C2=C(O)C(=O)N(CCCN3CCOCC3)C2c2cccc([N+](=O)[O-])c2)s1	SARS-CoV	ChEMBL		49.14	101380
CHEMBL196635	10062715	207	-7.9	CHEMBL196635	experimental	Inhibition	Small molecular drug	CCOC(=O)/C=C/[C@H](C[C@@H]1CCNC1=O)NC(=O)[C@H](CC=C(C)C)CC(=O)[C@@H](NC(=O)c1cc(C)on1)C(C)C	SARS-CoV	ChEMBL			800000
CHEMBL235873	44433698	223	-7.9	CHEMBL235873	experimental	Inhibition	Small molecular drug	CCOC(=O)/C=C/[C@H](C[C@@H]1CCNC1=O)NC(=O)[C@H](Cc1ccccc1)NC(=O)[C@@H](NC(=O)[C@H](CO)NC(=O)OC(C)(C)C)C(C)C	SARS-CoV	ChEMBL			15000
CHEMBL2441745	71544384	228	-7.9	CHEMBL2441745	experimental	Inhibition	Small molecular drug	CC(C)C[C@H](NC(=O)[C@H](Cc1cccc2ccccc12)NC(=O)OCc1ccccc1)C(=O)N[C@@H](C[C@@H]1CCNC1=O)C(=O)C(=O)NC(C)C	SARS-CoV	ChEMBL			610
CHEMBL3819122	127052512	277	-7.9	CHEMBL3819122	experimental	Inhibition	Small molecular drug	CC(=O)N[C@@H](CC(N)=O)C(=O)N[C@@H](CO)C(=O)N[C@@H](Cc1ccccc1)C(=O)N[C@@H](CO)C(=O)N[C@@H](CCC(N)=O)C(=O)O	SARS-CoV	ChEMBL	72000
CHEMBL487062	44563095	307	-7.9	CHEMBL487062	experimental	Inhibition	Small molecular drug	O=C1CSC2(CCN(Cc3ccccc3)CC2)N1c1ccccn1	SARS-CoV	ChEMBL		50
CHEMBL487069	44563053	308	-7.9	CHEMBL487069	experimental	Inhibition	Small molecular drug	O=C1CSC(c2c(F)cccc2Cl)N1c1ccc2ccccc2n1	SARS-CoV	ChEMBL		50
CHEMBL538957	45273180	336	-7.9	CHEMBL538957	experimental	Inhibition	Small molecular drug	CCN(CC)C(=O)CC[C@H](NC(=O)[C@H](CC(C)C)NC(=O)[C@@H](NC(=O)OCc1ccccc1)C(C)C)C(=O)c1nc2ccccc2s1	SARS-CoV	ChEMBL	49300
Sofosbuvir (PSI-7977, GS-7977); Hepcvir; Hepcinat;	45375808	8	-7.8	TTD ID/D0D4YZ	Approved	Modulator	Small molecular drug	CC(C)OC(=O)C(C)NP(=O)(OCC1C(C(C(O1)N2C=CC(=O)NC2=O)(C)F)O)OC3=CC=CC=C3	Hepatitis C virus infection; Virus infection;	TTD
N-(4-chlorophenyl)-2-({4-[4-methyl-5-(4-methyl-1,3-thiazol-2-yl)-2-(methylsulfanyl)thiophen-3-yl]pyrimidin-2-yl}sulfanyl)acetamide::pyrimidine-containing compound 3	2820912	51	-7.8	19511	experimental	Inhibitor	Small molecular drug	CSc1sc(c(C)c1-c1ccnc(SCC(=O)Nc2ccc(Cl)cc2)n1)-c1nc(C)cs1	SARS-CoV	BindingDB			11000
N-(4-butyl-2-methylphenyl)-2-[(5-cyano-4-cyclohexyl-6-oxo-1,6-dihydropyrimidin-2-yl)sulfanyl]acetamide::pyrimidinone-containing compound 19	501651	67	-7.8	19527	experimental	Inhibitor	Small molecular drug	CCCCc1ccc(NC(=O)CSc2nc(C3CCCCC3)c(C#N)c(=O)[nH]2)c(C)c1	SARS-CoV	BindingDB			200000
4-({4-[(2,3,3-trichloroprop-2-enoyl)oxy]benzene}sulfonyl)phenyl 2,3,3-trichloroprop-2-enoate::Compound 1 analog 4	2774892	77	-7.8	19538	experimental	Inhibitor	Small molecular drug	ClC(Cl)=C(Cl)C(=O)Oc1ccc(cc1)S(=O)(=O)c1ccc(OC(=O)C(Cl)=C(Cl)Cl)cc1	SARS-CoV	BindingDB			900
N-[(benzyloxy)carbonyl]-O-(tert-butyl)-L-threonyl-N1-((1S,2E)-4-ethoxy-4-oxo-1-{[(3S)-2-oxopyrrolidin-3-yl]methyl}but-2-enyl)-L-leucinamide::TG-0203770::TG-0205221 Analogue 4::ethyl (2E,4S)-4-[(2S)-2-[(2S,3S)-2-{[(benzyloxy)carbonyl]amino}-3-(tert-butoxy)butanamido]-4-methylpentanamido]-5-[(3S)-2-oxopyrrolidin-3-yl]pent-2-enoate	11786957	114	-7.8	200721	experimental	Inhibitor	Small molecular drug	CCOC(=O)\C=C\[C@H](C[C@@H]1CCNC1=O)NC(=O)[C@H](CC(C)C)NC(=O)[C@@H](NC(=O)OCc1ccccc1)C(C)OC(C)(C)C	SARS-CoV	BindingDB	58
TG-0204998	91899429	115	-7.8	200722	experimental	Inhibitor	Small molecular drug	CC(C)C[C@H](NC(=O)[C@H](CNC(=O)C(C)(C)C)NC(=O)OCc1ccccc1)C(=O)NC(C[C@@H]1CCNC1=O)=CCC(C)=O	SARS-CoV	BindingDB	38
4-(3-Benzylamino-phenyl)-2,4-dioxo-butyric acid::CHEMBL367740::CHEMBL371719::CHEMBL492571	510665	124	-7.8	50151732	experimental	Inhibitor	Small molecular drug	OC(=O)C(=O)CC(=O)c1cccc(NCc2ccccc2)c1	SARS-CoV	ChEMBL			5400
CHEMBL226271	16728904	214	-7.8	CHEMBL226271	experimental	Inhibition	Small molecular drug	Cc1cc(C(F)(F)F)nc(N2C(=O)CSC2c2c(F)cccc2Cl)n1	SARS-CoV	ChEMBL		50
CHEMBL3099529	73057092	240	-7.8	CHEMBL3099529	experimental	Inhibition	Small molecular drug	CC1CC(C)CN(S(=O)(=O)c2ccc3c(c2)C(=O)C(=O)N3C)C1	SARS-CoV	ChEMBL			2820
CHEMBL3105071	2219105	259	-7.8	CHEMBL3105071	experimental	Inhibition	Small molecular drug	COc1ccccc1CNC(=O)[C@H](C)NS(=O)(=O)c1ccccc1	SARS-CoV	ChEMBL			29900
CHEMBL393608	44433699	280	-7.8	CHEMBL393608	experimental	Inhibition	Small molecular drug	CCOC(=O)/C=C/[C@H](C[C@@H]1CCNC1=O)NC(=O)[C@H](CC(C)C)NC(=O)[C@@H](NC(=O)c1cc(C)on1)C(C)C	SARS-CoV	ChEMBL			200000
CHEMBL4213159	145964420	291	-7.8	CHEMBL4213159	experimental	Inhibition	Small molecular drug	CC(C)C[C@H](NC(=O)OC1CCN(S(C)(=O)=O)CC1)C(=O)N[C@@H](C[C@@H]1CCNC1=O)C(O)S(=O)(=O)[O-].[Na+]	Feline coronavirus (strain FIPV WSU-79/1146) (FCoV)	ChEMBL			2300
CHEMBL4214471	145972736	293	-7.8	CHEMBL4214471	experimental	Inhibition	Small molecular drug	CC(C)C[C@H](NC(=O)OC1(Cc2ccccc2)CCN(S(C)(=O)=O)CC1)C(=O)N[C@H](C=O)C[C@@H]1CCNC1=O	Middle East respiratory syndrome-related coronavirus (isolate UnitedKingdom/H123990006/2012) (Betacoronavirus England 1) (Humancoronavirus EMC)	ChEMBL			700
CHEMBL478987	135452883	304	-7.8	CHEMBL478987	experimental	Inhibition	Small molecular drug	CCN1/C(=C\C=c2/s/c(=C\c3sc4ccccc4[n+]3CC)n(CC)c2=O)Sc2ccccc21	SARS-CoV	ChEMBL			10000
CHEMBL488268	44562986	312	-7.8	CHEMBL488268	experimental	Inhibition	Small molecular drug	Cc1cccc(N2C(=O)CSC2c2ccc(-c3cccnc3)cc2)n1	SARS-CoV	ChEMBL		50
CHEMBL492772	44511707	320	-7.8	CHEMBL492772	experimental	Inhibition	Small molecular drug	O=C(O)/C(O)=C/C(=O)c1ccccc1OCc1ccc(Cl)cc1	SARS-CoV	ChEMBL			28700
CHEMBL555062	45269764	349	-7.8	CHEMBL555062	experimental	Inhibition	Small molecular drug	CC(C)C[C@H](NC(=O)[C@@H](NC(=O)OCc1ccccc1)C(C)C)C(=O)N[C@@H](CCC(=O)N1CCOCC1)C(=O)c1nccs1	SARS-CoV	ChEMBL	478000
CHEMBL555220	45272304	350	-7.8	CHEMBL555220	experimental	Inhibition	Small molecular drug	CC(C)C[C@H](NC(=O)[C@@H](NC(=O)OCc1ccccc1)C(C)C)C(=O)N[C@@H](CCC(=O)N(C)Cc1ccccc1)C(=O)C(F)(F)F	SARS-CoV	ChEMBL	34100
AG7088 analogue 3b::ethyl (2E,4S)-4-[(2R,5S)-5-{[(benzyloxy)carbonyl]amino}-2-[(4-fluorophenyl)methyl]-6-methyl-4-oxoheptanamido]-5-phenylpent-2-enoate	15959295	37	-7.7	19497	experimental	Inhibitor	Small molecular drug	CCOC(=O)\C=C\[C@H](Cc1ccccc1)NC(=O)[C@@H](CC(=O)[C@@H](NC(=O)OCc1ccccc1)C(C)C)Cc1ccc(F)cc1	SARS-CoV	BindingDB			31000
N-[4-(propan-2-yl)phenyl]-2-{[4-(thiophen-2-yl)pyrimidin-2-yl]sulfanyl}acetamide::pyrimidine-containing compound 11	2811874	59	-7.7	19519	experimental	Inhibitor	Small molecular drug	CC(C)c1ccc(NC(=O)CSc2nccc(n2)-c2cccs2)cc1	SARS-CoV	BindingDB			40000
2-{[4-(4-methoxyphenyl)pyrimidin-2-yl]sulfanyl}-N-[4-(propan-2-yl)phenyl]acetamide::pyrimidine-containing compound 26	2823615	74	-7.7	19534	experimental	Inhibitor	Small molecular drug	COc1ccc(cc1)-c1ccnc(SCC(=O)Nc2ccc(cc2)C(C)C)n1	SARS-CoV	BindingDB			400000
2-(benzenesulfonyl)-4,6-dimethyl-5-nitropyridine-3-carbonitrile::Compound 1 analog 7::cid_2726174	2726174	80	-7.7	19541	experimental	Inhibitor	Small molecular drug	Cc1nc(c(C#N)c(C)c1[N+]([O-])=O)S(=O)(=O)c1ccccc1	SARS-CoV	BindingDB			13000
4-(4-(4-chlorobenzyloxy)phenyl)-2-hydroxy-4-oxobut-2-enoic acid::CHEMBL492769	91935360	119	-7.7	50151722	experimental	Inhibitor	Small molecular drug	OC(=O)C(=O)CC(=O)c1ccc(OCc2ccc(Cl)cc2)cc1	SARS-CoV	ChEMBL			>50000
1-[2-(dimethylamino)ethyl]-3-hydroxy-5-(4-hydroxy-3-methoxyphenyl)-4-(4-isobutoxy-2-methylbenzoyl)-1,5-dihydro-2H-pyrrol-2-one::CHEMBL1774323	4757977	138	-7.7	50172848	experimental	Inhibitor	Small molecular drug	COc1cc(ccc1O)C1C(C(=O)c2ccc(OCC(C)C)cc2C)C(=O)C(=O)N1CCN(C)C	SARS-CoV	ChEMBL			62790
CHEMBL1774325	135470831	203	-7.7	CHEMBL1774325	experimental	Inhibition	Small molecular drug	COc1cc(/C=N/NC(=O)/C(=C\c2ccccc2)NC(=O)c2ccccc2)cc(OC)c1O	SARS-CoV	ChEMBL		56.11	77090
FERRUGINOL	442027	208	-7.7	CHEMBL197308	experimental	Inhibition	Small molecular drug	CC(C)c1cc2c(cc1O)[C@@]1(C)CCCC(C)(C)[C@@H]1CC2	SARS-CoV	ChEMBL		92.7
CHEMBL3099541	4117477	252	-7.7	CHEMBL3099541	experimental	Inhibition	Small molecular drug	CC1CCN(S(=O)(=O)c2ccc3c(c2)C(=O)C(=O)N3)CC1	SARS-CoV	ChEMBL			1180
CHEMBL4217568	145972878	295	-7.7	CHEMBL4217568	experimental	Inhibition	Small molecular drug	CCOC(=O)N1CCC(OC(=O)N[C@@H](CC(C)C)C(=O)N[C@H](C=O)C[C@@H]2CCNC2=O)CC1	Middle East respiratory syndrome-related coronavirus (isolate UnitedKingdom/H123990006/2012) (Betacoronavirus England 1) (Humancoronavirus EMC)	ChEMBL			600
CHEMBL515787	44584944	328	-7.7	CHEMBL515787	experimental	Inhibition	Small molecular drug	CCN1/C(=C\C(=C/c2sc3ccccc3[n+]2CCCS(=O)(=O)[O-])OC)Sc2ccc(OC)cc21	SARS-CoV	ChEMBL			7300
ABIETIC ACID	10569	358	-7.7	CHEMBL71893	experimental	Inhibition	Small molecular drug	CC(C)C1=CC2=CC[C@H]3[C@](C)(C(=O)O)CCC[C@]3(C)[C@H]2CC1	SARS-CoV	ChEMBL		58	189100
N-[(benzyloxy)carbonyl]-O-(tert-butyl)-L-threonyl-3-cyclohexyl-N1-{(1S)-1-formyl-2-[(3S)-2-oxopyrrolidin-3-yl]ethyl}-L-alaninamide::TG-0205221::benzyl N-[(1S,2S)-2-(tert-butoxy)-1-{[(1S)-2-cyclohexyl-1-{[(2S)-1-oxo-3-[(3S)-2-oxopyrrolidin-3-yl]propan-2-yl]carbamoyl}ethyl]carbamoyl}propyl]carbamate	91895789	20	-7.6	19478	experimental	Inhibitor	Small molecular drug	C[C@H](OC(C)(C)C)[C@H](NC(=O)OCc1ccccc1)C(=O)N[C@@H](CC1CCCCC1)C(=O)N[C@@H](C[C@@H]1CCNC1=O)C=O	SARS-CoV	BindingDB	53
AG7088 analogue 2c::ethyl (2E,4S)-4-[(2S)-2-[(2S)-3-methyl-2-[(5-methyl-1,2-oxazol-3-yl)formamido]butanamido]-3-phenylpropanamido]-5-[(3S)-2-oxopyrrolidin-3-yl]pent-2-enoate	15956553	35	-7.6	19494	experimental	Inhibitor	Small molecular drug	CCOC(=O)\C=C\[C@H](C[C@@H]1CCNC1=O)NC(=O)[C@H](Cc1ccccc1)NC(=O)[C@@H](NC(=O)c1cc(C)on1)C(C)C	SARS-CoV	BindingDB			80000
1-nitro-4-[(4-nitrobenzene)sulfonyl]benzene::Compound 1 analog 13	70871	86	-7.6	19547	experimental	Inhibitor	Small molecular drug	[O-][N+](=O)c1ccc(cc1)S(=O)(=O)c1ccc(cc1)[N+]([O-])=O	SARS-CoV	BindingDB			25000
Compound 2 analog 17::N-[3-(5-tert-butyl-2-methylfuran-3-yl)-1H-pyrazol-5-yl]thiophene-2-sulfonamide	2742278	89	-7.6	19551	experimental	Inhibitor	Small molecular drug	Cc1oc(cc1-c1cc(NS(=O)(=O)c2cccs2)[nH]n1)C(C)(C)C	SARS-CoV	BindingDB			10000
Benzotriazole ester, 4	15959236	99	-7.6	111450	experimental	Inhibitor	Small molecular drug	CN(C)c1ccc(cc1)C(=O)On1nnc2ccccc12	SARS-CoV	BindingDB	17.4
Benzotriazole ester, 13	677493	106	-7.6	111457	experimental	Inhibitor	Small molecular drug	O=C(Cn1nnc2ccccc12)c1ccc(cc1)N(=O)=O	SARS-CoV	BindingDB			>5.0e+4
TG-0205486	91899430	117	-7.6	200724	experimental	Inhibitor	Small molecular drug	CC(C)C[C@H](NC(=O)[C@@H](NC(=O)OCc1ccccc1)C(C)OC(C)(C)C)C(=O)NC(C[C@@H]1CCNC1=O)=CCC(=O)C1CC1	SARS-CoV	BindingDB	99
4-(3-(4-chlorobenzylamino)phenyl)-2-hydroxy-4-oxobut-2-enoic acid::CHEMBL522710	91935363	125	-7.6	50151734	experimental	Inhibitor	Small molecular drug	OC(=O)C(=O)CC(=O)c1cccc(NCc2ccc(Cl)cc2)c1	SARS-CoV	ChEMBL			11000
LUTEOLIN	5280445	198	-7.6	CHEMBL151	experimental	Inhibition	Small molecular drug	O=c1cc(-c2ccc(O)c(O)c2)oc2cc(O)cc(O)c12	SARS-CoV	ChEMBL			20000
APIGENIN	5280443	230	-7.6	CHEMBL28	experimental	Inhibition	Small molecular drug	O=c1cc(-c2ccc(O)cc2)oc2cc(O)cc(O)c12	SARS-CoV	ChEMBL		40	280800
CHEMBL3099533	58589722	244	-7.6	CHEMBL3099533	experimental	Inhibition	Small molecular drug	CN1CCN(S(=O)(=O)c2ccc3c(c2)C(=O)C(=O)N3)CC1	SARS-CoV	ChEMBL		98.64	76740
CHEMBL3099537	73056466	248	-7.6	CHEMBL3099537	experimental	Inhibition	Small molecular drug	COc1cc(CN2CCN(S(=O)(=O)c3ccc4c(c3)C(=O)C(=O)N4)CC2)cc(OC)c1OC	SARS-CoV	ChEMBL			32080
CHEMBL492571	25256829	315	-7.6	CHEMBL492571	experimental	Inhibition	Small molecular drug	O=C(O)/C(O)=C/C(=O)c1cccc(NCc2ccccc2)c1	SARS-CoV	ChEMBL			5400
CHEMBL492771	25256828	319	-7.6	CHEMBL492771	experimental	Inhibition	Small molecular drug	O=C(O)/C(O)=C/C(=O)c1cccc(OCc2ccc(Cl)cc2)c1	SARS-CoV	ChEMBL			13600
CHEMBL61320	4117383	356	-7.6	CHEMBL61320	experimental	Inhibition	Small molecular drug	O=C1Nc2ccc(S(=O)(=O)N3CCCCC3)cc2C1=O	SARS-CoV	ChEMBL			4450
N-[(benzyloxy)carbonyl]-L-valyl-N1-((1S,2E)-4-ethoxy-4-oxo-1-{[(3S)-2-oxopyrrolidin-3-yl]methyl}but-2-enyl)-L-leucinamide::TG-0205221 Analogue 3::ethyl (2E,4S)-4-[(2S)-2-[(2S)-2-{[(benzyloxy)carbonyl]amino}-3-methylbutanamido]-4-methylpentanamido]-5-[(3S)-2-oxopyrrolidin-3-yl]pent-2-enoate	11444522	19	-7.5	19476	experimental	Inhibitor	Small molecular drug	CCOC(=O)\C=C\[C@H](C[C@@H]1CCNC1=O)NC(=O)[C@H](CC(C)C)NC(=O)[C@@H](NC(=O)OCc1ccccc1)C(C)C	SARS-CoV	BindingDB	660
NICLOSAMIDE::5-chloro-N-(2-chloro-4-nitrophenyl)-2-hydroxybenzamide	4477	29	-7.5	19487	experimental	Inhibitor	Small molecular drug	O=C(Nc1ccc([N+](=O)[O-])cc1Cl)c1cc(Cl)ccc1O	SARS-CoV	BindingDB			40000
AG7088 analogue 3c::ethyl (2E,4S)-4-[(2R,5S)-2-benzyl-6-methyl-5-[(5-methyl-1,2-oxazol-3-yl)formamido]-4-oxoheptanamido]-5-phenylpent-2-enoate	15959296	38	-7.5	19498	experimental	Inhibitor	Small molecular drug	CCOC(=O)\C=C\[C@H](Cc1ccccc1)NC(=O)[C@@H](CC(=O)[C@@H](NC(=O)c1cc(C)on1)C(C)C)Cc1ccccc1	SARS-CoV	BindingDB			13000
N-(4-chlorophenyl)-2-({4-[2-(2-methyl-1,3-thiazol-4-yl)-1,3-thiazol-4-yl]pyrimidin-2-yl}sulfanyl)acetamide::pyrimidine-containing compound 5	2744846	53	-7.5	19513	experimental	Inhibitor	Small molecular drug	Cc1nc(cs1)-c1nc(cs1)-c1ccnc(SCC(=O)Nc2ccc(Cl)cc2)n1	SARS-CoV	BindingDB			14000
N-(5-chloro-2-phenoxyphenyl)-2-[(4-methyl-6-oxo-1,6-dihydropyrimidin-2-yl)sulfanyl]acetamide::pyrimidinone-containing compound 15	1212367	63	-7.5	19523	experimental	Inhibitor	Small molecular drug	Cc1cc(=O)[nH]c(SCC(=O)Nc2cc(Cl)ccc2Oc2ccccc2)n1	SARS-CoV	BindingDB			100000
N-(4-chloro-2-fluorophenyl)-2-{[4-methyl-6-(trifluoromethyl)pyrimidin-2-yl]sulfanyl}acetamide::pyrimidine-containing compound 27	1342108	75	-7.5	19535	experimental	Inhibitor	Small molecular drug	Cc1cc(nc(SCC(=O)Nc2ccc(Cl)cc2F)n1)C(F)(F)F	SARS-CoV	BindingDB			500000
Benzotriazole ester, 3	15959235	98	-7.5	111449	experimental	Inhibitor	Small molecular drug	Nc1ccccc1C(=O)On1nnc2ccccc12	SARS-CoV	BindingDB	19.5
Benzotriazole ester, 17	15959246	110	-7.5	111461	experimental	Inhibitor	Small molecular drug	CNc1ccc(cc1)C(=O)Cn1nnc2ccccc12	SARS-CoV	BindingDB	4500
4-(4-(benzyloxy)phenyl)-2-hydroxy-4-oxobut-2-enoic acid::CHEMBL492768	23090268	118	-7.5	50151719	experimental	Inhibitor	Small molecular drug	OC(=O)C(=O)CC(=O)c1ccc(OCc2ccccc2)cc1	SARS-CoV	ChEMBL			39900
4-(2-Benzyloxy-phenyl)-2,4-dioxo-butyric acid::4-[2-(benzyloxy)phenyl]-2,4-dioxobutanoic acid::CHEMBL199199::CHEMBL368481::CHEMBL499444	510646	121	-7.5	50151725	experimental	Inhibitor	Small molecular drug	OC(=O)C(=O)CC(=O)c1ccccc1OCc1ccccc1	SARS-CoV	ChEMBL			>50000
4-(2-(4-chlorobenzyloxy)phenyl)-2-hydroxy-4-oxobut-2-enoic acid::CHEMBL492772	91935362	123	-7.5	50151730	experimental	Inhibitor	Small molecular drug	OC(=O)C(=O)CC(=O)c1ccccc1OCc1ccc(Cl)cc1	SARS-CoV	ChEMBL			28700
18-OXOFERRUGINOL	52946772	177	-7.5	CHEMBL1277662	experimental	Inhibition	Small molecular drug	CC(C)c1cc2c(cc1O)[C@@]1(C)CCC[C@@](C)(C=O)[C@@H]1CC2	SARS-CoV	ChEMBL		70.5	163200
CHEMBL376552	16728903	267	-7.5	CHEMBL376552	experimental	Inhibition	Small molecular drug	Cc1cc(C(F)(F)F)nc(N2C(=O)CSC2c2c(Cl)cccc2Cl)n1	SARS-CoV	ChEMBL		50
CHEMBL3818400	127052510	274	-7.5	CHEMBL3818400	experimental	Inhibition	Small molecular drug	CC(=O)N[C@@H](CC(=O)O)C(=O)N[C@@H](CO)C(=O)N[C@H](C(=O)N[C@@H](CC(C)C)C(=O)N[C@@H](CCC(N)=O)C(=O)O)[C@@H](C)O	SARS-CoV	ChEMBL			10000
CHEMBL4212620	145964401	290	-7.5	CHEMBL4212620	experimental	Inhibition	Small molecular drug	CCC1(OC(=O)N[C@@H](CC(C)C)C(=O)N[C@H](C=O)C[C@@H]2CCNC2=O)CCN(C(=O)OC(C)(C)C)CC1	Feline coronavirus (strain FIPV WSU-79/1146) (FCoV)	ChEMBL			5500
CHEMBL488059	25189011	309	-7.5	CHEMBL488059	experimental	Inhibition	Small molecular drug	Cc1cc(C(F)(F)F)nc(N2C(=O)CSC2c2c(Br)cccc2Br)n1	SARS-CoV	ChEMBL		50
CHEMBL499444	44404067	321	-7.5	CHEMBL499444	experimental	Inhibition	Small molecular drug	O=C(O)/C(O)=C/C(=O)c1ccccc1OCc1ccccc1	SARS-CoV	ChEMBL			50000
CHEMBL555061	45269761	348	-7.5	CHEMBL555061	experimental	Inhibition	Small molecular drug	CC(C)C[C@H](NC(=O)[C@@H](NC(=O)OCc1ccccc1)C(C)C)C(=O)N[C@@H](CCC(=O)N1CCOCC1)C(=O)C(F)(F)F	SARS-CoV	ChEMBL	21000
AG7088 analogue 1b::ethyl (2E,4S)-4-[(2R,5S)-5-{[(benzyloxy)carbonyl]amino}-2-[(4-fluorophenyl)methyl]-6-methyl-4-oxoheptanamido]-5-[(3S)-2-oxopyrrolidin-3-yl]pent-2-enoate	15959291	31	-7.4	19489	experimental	Inhibitor	Small molecular drug	CCOC(=O)\C=C\[C@H](C[C@@H]1CCNC1=O)NC(=O)[C@@H](CC(=O)[C@@H](NC(=O)OCc1ccccc1)C(C)C)Cc1ccc(F)cc1	SARS-CoV	BindingDB			>100000
2-({4-[2-(2-chlorophenoxymethyl)-1,3-thiazol-4-yl]pyrimidin-2-yl}sulfanyl)-N-[4-(propan-2-yl)phenyl]acetamide::pyrimidine-containing compound 17	2744870	65	-7.4	19525	experimental	Inhibitor	Small molecular drug	CC(C)c1ccc(NC(=O)CSc2nccc(n2)-c2csc(COc3ccccc3Cl)n2)cc1	SARS-CoV	BindingDB			200000
1-[(4-chlorobenzene)sulfonyl]-2-nitro-4-(trifluoromethyl)benzene::Compound 1 analog 6	2797358	79	-7.4	19540	experimental	Inhibitor	Small molecular drug	[O-][N+](=O)c1cc(ccc1S(=O)(=O)c1ccc(Cl)cc1)C(F)(F)F	SARS-CoV	BindingDB			12000
Benzotriazole ester, 8	15959240	103	-7.4	111454	experimental	Inhibitor	Small molecular drug	O=C(On1nnc2ccccc12)c1ccc2[nH]ccc2c1	SARS-CoV	BindingDB	7.5
Benzotriazole ester, 18	15959247	111	-7.4	111462	experimental	Inhibitor	Small molecular drug	CN(C)c1ccc(cc1)C(=O)Cn1nnc2ccccc12	SARS-CoV	BindingDB	6700
(Z)-4-(3-Benzyloxy-phenyl)-2-hydroxy-4-oxo-but-2-enoic acid::4-(3-Benzyloxy-phenyl)-2-hydroxy-4-oxo-but-2-enoic acid::CHEMBL108253::CHEMBL18927::CHEMBL492770	493415	120	-7.4	50151724	experimental	Inhibitor	Small molecular drug	OC(=O)C(=O)CC(=O)c1cccc(OCc2ccccc2)c1	SARS-CoV	ChEMBL			>50000
CURCUMIN	5281767	164	-7.4	CHEMBL116438	experimental	Inhibition	Small molecular drug	COc1cc(/C=C/C(=O)/C=C(O)/C=C/c2ccc(O)c(OC)c2)ccc1O	SARS-CoV	ChEMBL			23500
CHEMBL4204431	145978039	286	-7.4	CHEMBL4204431	experimental	Inhibition	Small molecular drug	CCOC(=O)N1CCC(OC(=O)N[C@@H](CC(C)C)C(=O)N[C@@H](C[C@@H]2CCNC2=O)C(O)S(=O)(=O)[O-])CC1.[Na+]	Feline coronavirus (strain FIPV WSU-79/1146) (FCoV)	ChEMBL			1100
CHEMBL4208240	145975487	287	-7.4	CHEMBL4208240	experimental	Inhibition	Small molecular drug	CC(C)C[C@H](NC(=O)OC1CCN(C(=O)OC(C)(C)C)CC1)C(=O)N[C@@H](C[C@@H]1CCNC1=O)C(O)S(=O)(=O)[O-].[Na+]	Middle East respiratory syndrome-related coronavirus (isolate UnitedKingdom/H123990006/2012) (Betacoronavirus England 1) (Humancoronavirus EMC)	ChEMBL			400
QUERCETIN	5280343	322	-7.4	CHEMBL50	experimental	Inhibition	Small molecular drug	O=c1c(O)c(-c2ccc(O)c(O)c2)oc2cc(O)cc(O)c12	SARS-CoV	ChEMBL			8100
CHEMBL551569	16085283	345	-7.4	CHEMBL551569	experimental	Inhibition	Small molecular drug	CC(C)C[C@H](NC(=O)[C@@H](NC(=O)OCc1ccccc1)C(C)C)C(=O)N[C@@H](CCC(=O)O)C(=O)C(F)(F)F	SARS-CoV	ChEMBL	116000
CHEMBL557699	45273184	353	-7.4	CHEMBL557699	experimental	Inhibition	Small molecular drug	CCN(CC)C(=O)CC[C@H](NC(=O)[C@@H](NC(=O)OCc1ccccc1)C(C)C)C(=O)c1nc2ccccc2s1	SARS-CoV	ChEMBL	159000
NALPHA-[(BENZYLOXY)CARBONYL]-N-[(1R)-4-HYDROXY-1-METHYL-2-OXOBUTYL]-L-PHENYLALANINAMIDE	16220131	5	-7.3	DB08732	experimental	inhibitor	Small molecular drug	[H][C@](C)(NC(=O)[C@]([H])(CC1=CC=CC=C1)NC(=O)OCC1=CC=CC=C1)C(=O)CCO	SARS-CoV	DrugBank
3-[(4,6-dimethylpyrimidin-2-yl)sulfanyl]-1-(4-ethoxyphenyl)pyrrolidine-2,5-dione::pyrimidine-containing compound 22	91895790	70	-7.3	19530	experimental	Inhibitor	Small molecular drug	CCOc1ccc(cc1)-n1c(O)cc(Sc2nc(C)cc(C)n2)c1O	SARS-CoV	BindingDB			300000
5-[(4-chlorobenzene)sulfonyl]pyrimidine-2,4-diamine::Compound 1 analog 5	2819040	78	-7.3	19539	experimental	Inhibitor	Small molecular drug	Nc1ncc(c(N)n1)S(=O)(=O)c1ccc(Cl)cc1	SARS-CoV	BindingDB			6000
2-[(4-chlorobenzene)sulfonyl]-5-nitro-1-oxidopyridin-1-ium::Compound 1 analog 9	2774667	82	-7.3	19543	experimental	Inhibitor	Small molecular drug	[O-][N+](=O)c1ccc([n+]([O-])c1)S(=O)(=O)c1ccc(Cl)cc1	SARS-CoV	BindingDB			15000
Benzotriazole ester, 5	15959237	100	-7.3	111451	experimental	Inhibitor	Small molecular drug	CNc1ccc(cc1)C(=O)On1nnc2ccccc12	SARS-CoV	BindingDB	12.1
Benzotriazole ester, 15	15959244	108	-7.3	111459	experimental	Inhibitor	Small molecular drug	Nc1ccc(cc1)C(=O)Cn1nnc2ccccc12	SARS-CoV	BindingDB			>5.0e+4
18-HYDROXYFERRUGINOL	21582568	209	-7.3	CHEMBL197310	experimental	Inhibition	Small molecular drug	CC(C)c1cc2c(cc1O)[C@@]1(C)CCC[C@@](C)(CO)[C@@H]1CC2	SARS-CoV	ChEMBL		45.8	220800
CHEMBL3099526	73057089	237	-7.3	CHEMBL3099526	experimental	Inhibition	Small molecular drug	CC1CCN(S(=O)(=O)c2ccc3c(c2)C(=O)C(=O)N3C)CC1	SARS-CoV	ChEMBL			1040
CHEMBL3099544	73056763	255	-7.3	CHEMBL3099544	experimental	Inhibition	Small molecular drug	CN1CCN(S(=O)(=O)c2ccc3c(c2)C(=O)C(=O)N3C)CC1	SARS-CoV	ChEMBL			11830
CHEMBL3105072	4236803	260	-7.3	CHEMBL3105072	experimental	Inhibition	Small molecular drug	Nc1ccc(F)c(S(=O)(=O)Nc2cccc(C(F)(F)F)c2)c1	SARS-CoV	ChEMBL			29800
CHEMBL3817852	127052513	271	-7.3	CHEMBL3817852	experimental	Inhibition	Small molecular drug	CC(=O)N[C@@H](CC(=O)O)C(=O)N[C@@H](CO)C(=O)N[C@@H](Cc1ccccc1)C(=O)N[C@@H](CC(=O)O)C(=O)N[C@@H](CCC(N)=O)C(=O)O	SARS-CoV	ChEMBL	41000
CHEMBL484273	8027611	306	-7.3	CHEMBL484273	experimental	Inhibition	Small molecular drug	O=C1Nc2ccc(S(=O)(=O)N3CCOCC3)cc2C1=O	SARS-CoV	ChEMBL			12660
CHEMBL488250	44563092	310	-7.3	CHEMBL488250	experimental	Inhibition	Small molecular drug	CC1SC(c2c(Cl)cccc2Cl)N(c2ccccn2)C1=O	SARS-CoV	ChEMBL		50
2-[(2,4-DICHLORO-5-METHYLPHENYL)SULFONYL]-1,3-DINITRO-5-(TRIFLUOROMETHYL)BENZENE	2799606	2	-7.2	DB07620	experimental	inhibitor	Small molecular drug	CC1=CC(=C(Cl)C=C1Cl)S(=O)(=O)C1=C(C=C(C=C1[N+]([O-])=O)C(F)(F)F)[N+]([O-])=O	SARS-CoV	DrugBank
N-(3,5-dichlorophenyl)-2-{[4-(2-phenyl-1,3-thiazol-4-yl)pyrimidin-2-yl]sulfanyl}acetamide::pyrimidine-containing compound 1	2744814	49	-7.2	19509	experimental	Inhibitor	Small molecular drug	Clc1cc(Cl)cc(NC(=O)CSc2nccc(n2)-c2csc(n2)-c2ccccc2)c1	SARS-CoV	BindingDB			3000
N-(2-chlorophenyl)-2-({4-[4-methyl-5-(4-methyl-1,3-thiazol-2-yl)-2-(methylsulfanyl)thiophen-3-yl]pyrimidin-2-yl}sulfanyl)acetamide::pyrimidine-containing compound 4	2820914	52	-7.2	19512	experimental	Inhibitor	Small molecular drug	CSc1sc(c(C)c1-c1ccnc(SCC(=O)Nc2ccccc2Cl)n1)-c1nc(C)cs1	SARS-CoV	BindingDB			12000
Benzotriazole ester, 20	15959249	113	-7.2	111464	experimental	Inhibitor	Small molecular drug	CN(C)c1ccc(cc1)C(O)Cn1nnc2ccccc12	SARS-CoV	BindingDB	>5.0e+4
CHEMBL1277754	52945977	178	-7.2	CHEMBL1277754	experimental	Inhibition	Small molecular drug	CC(=O)Oc1cc2c(cc1C(C)C)CC[C@@H]1[C@]2(C)CCC[C@@]1(C)CO	SARS-CoV	ChEMBL		78.6	128900
CHEMBL1487869	948801	196	-7.2	CHEMBL1487869	experimental	Inhibition	Small molecular drug	Cn1cnc2cc(NC(=O)c3ccc(Cl)cc3)ccc21	SARS-CoV	ChEMBL		50	18200
CHEMBL238217	44433696	224	-7.2	CHEMBL238217	experimental	Inhibition	Small molecular drug	CCOC(=O)/C=C/[C@H](C[C@@H]1CCNC1=O)NC(=O)[C@H](CC=C(C)C)CC(=O)[C@@H](NC(=O)[C@H](CO)NC(=O)OC(C)(C)C)C(C)C	SARS-CoV	ChEMBL			80000
CHEMBL244282	16728009	229	-7.2	CHEMBL244282	experimental	Inhibition	Small molecular drug	CCc1nnc(N2C(=O)CSC2c2c(F)cccc2F)s1	SARS-CoV	ChEMBL		50
CHEMBL3099523	4614896	234	-7.2	CHEMBL3099523	experimental	Inhibition	Small molecular drug	CN1C(=O)C(=O)c2cc(S(=O)(=O)N3CCOCC3)ccc21	SARS-CoV	ChEMBL			9910
CHEMBL3105076	3635406	264	-7.2	CHEMBL3105076	experimental	Inhibition	Small molecular drug	Nc1ncnc2[nH]c(C(F)(F)F)nc12	SARS-CoV	ChEMBL		50	2200
CHEMBL539208	45272299	337	-7.2	CHEMBL539208	experimental	Inhibition	Small molecular drug	CCCN(CCC)C(=O)CC[C@H](NC(=O)[C@H](CC(C)C)NC(=O)[C@@H](NC(=O)OCc1ccccc1)C(C)C)C(=O)C(F)(F)F	SARS-CoV	ChEMBL	363000
CHEMBL555221	45272305	351	-7.2	CHEMBL555221	experimental	Inhibition	Small molecular drug	CCN(CC)C(=O)CC[C@H](NC(=O)[C@H](CC(C)C)NC(=O)[C@@H](NC(=O)OCc1ccccc1)C(C)C)C(=O)c1nccs1	SARS-CoV	ChEMBL	112000
2-{[4-(dimethoxymethyl)-6-hydroxypyrimidin-2-yl]sulfanyl}-N-[4-(trifluoromethyl)phenyl]acetamide::pyrimidine-containing compound 18	2745968	66	-7.1	19526	experimental	Inhibitor	Small molecular drug	COC(OC)c1cc(=O)[nH]c(SCC(=O)Nc2ccc(cc2)C(F)(F)F)n1	SARS-CoV	BindingDB			200000
ethyl 4-amino-2-({[(4-nitrophenyl)carbamoyl]methyl}sulfanyl)pyrimidine-5-carboxylate::pyrimidine-containing compound 21	2810524	69	-7.1	19529	experimental	Inhibitor	Small molecular drug	CCOC(=O)c1cnc(SCC(=O)Nc2ccc(cc2)[N+]([O-])=O)nc1N	SARS-CoV	BindingDB			250000
Compound 2 analog 18::N-{4-[(4-chlorobenzene)sulfonyl]-3-(methylsulfanyl)-1H-pyrazol-5-yl}thiophene-2-carboxamide	2819269	90	-7.1	19552	experimental	Inhibitor	Small molecular drug	CSc1n[nH]c(NC(=O)c2cccs2)c1S(=O)(=O)c1ccc(Cl)cc1	SARS-CoV	BindingDB			15000
1,3-dimethyl-4-nitro-N-{[5-(thiophen-2-yl)thiophen-2-yl]methyl}-1H-pyrazol-5-amine::Compound 2 analog 22	4305683	94	-7.1	19556	experimental	Inhibitor	Small molecular drug	Cc1nn(C)c(NCc2ccc(s2)-c2cccs2)c1[N+]([O-])=O	SARS-CoV	BindingDB			20000
Benzotriazole ester, 6	15959238	101	-7.1	111452	experimental	Inhibitor	Small molecular drug	CCN(CC)c1ccc(cc1)C(=O)On1nnc2ccccc12	SARS-CoV	BindingDB	11.1
Benzotriazole ester, 16	15959245	109	-7.1	111460	experimental	Inhibitor	Small molecular drug	Nc1ccc(cc1)C(O)Cn1nnc2ccccc12	SARS-CoV	BindingDB			>5.0e+4
CHEMBL1774323	5735082	201	-7.1	CHEMBL1774323	experimental	Inhibition	Small molecular drug	COc1cc(C2C(C(=O)c3ccc(OCC(C)C)cc3C)=C(O)C(=O)N2CCN(C)C)ccc1O	SARS-CoV	ChEMBL		61.36	62790
CHEMBL4216101	145972809	294	-7.1	CHEMBL4216101	experimental	Inhibition	Small molecular drug	CCC1(OC(=O)N[C@@H](CC(C)C)C(=O)N[C@@H](C[C@@H]2CCNC2=O)C(O)S(=O)(=O)[O-])CCN(C(=O)OC(C)(C)C)CC1.[Na+]	SARS coronavirus	ChEMBL			4100
CHEMBL551181	45269763	343	-7.1	CHEMBL551181	experimental	Inhibition	Small molecular drug	CCCN(CCC)C(=O)CC[C@H](NC(=O)[C@H](CC(C)C)NC(=O)OCc1ccccc1)C(=O)C(F)(F)F	SARS-CoV	ChEMBL	584000
CHEMBL551504	45271412	344	-7.1	CHEMBL551504	experimental	Inhibition	Small molecular drug	CCN(CC)C(=O)CC[C@H](NC(=O)[C@H](CC(C)C)NC(=O)OCc1ccccc1)C(=O)c1nccs1	SARS-CoV	ChEMBL	462000
CHEMBL553172	45273174	346	-7.1	CHEMBL553172	experimental	Inhibition	Small molecular drug	CC(C)C[C@H](NC(=O)[C@@H](NC(=O)[C@H](C)NC(=O)OCc1ccccc1)C(C)C)C(=O)N[C@@H](CCC(N)=O)C(=O)C(F)(F)F	SARS-CoV	ChEMBL	135000
3-[(furan-2-ylmethyl)amino]-6,6-dimethyl-4-oxo-4,5,6,7-tetrahydro-2-benzothiophene-1-carbonitrile::Compound 2 analog 19	2820775	91	-7	19553	experimental	Inhibitor	Small molecular drug	CC1(C)Cc2c(sc(NCc3ccco3)c2C(=O)C1)C#N	SARS-CoV	BindingDB			16000
Benzotriazole ester, 19	15959248	112	-7	111463	experimental	Inhibitor	Small molecular drug	CNc1ccc(cc1)C(O)Cn1nnc2ccccc12	SARS-CoV	BindingDB	>5.0e+4
CHEMBL1906723	2849659	206	-7	CHEMBL1906723	experimental	Inhibition	Small molecular drug	COc1ccc(C(=O)Cn2c(NCCO)nc3ccccc32)cc1	SARS-CoV	ChEMBL			28800
CHEMBL2316337	71571222	220	-7	CHEMBL2316337	experimental	Inhibition	Small molecular drug	CC(C)C[C@H](NC(=O)[C@@H](NC(=O)[C@H](C)NC(=O)OCc1ccccc1)C(C)C)C(=O)N[C@H](C#N)CCC(N)=O	SARS-CoV	ChEMBL			4600
CHEMBL2316339	71571220	222	-7	CHEMBL2316339	experimental	Inhibition	Small molecular drug	Cc1cc(C(=O)N[C@@H](C)C(=O)N[C@H](C(=O)N[C@@H](CC(C)C)C(=O)N[C@H](C#N)CCC(N)=O)C(C)C)no1	SARS-CoV	ChEMBL			49000
CHEMBL4209146	145964710	289	-7	CHEMBL4209146	experimental	Inhibition	Small molecular drug	CC(C)C[C@H](NC(=O)OC1CCN(S(C)(=O)=O)CC1)C(=O)N[C@H](C=O)C[C@@H]1CCNC1=O	Feline coronavirus (strain FIPV WSU-79/1146) (FCoV)	ChEMBL			3500
CHEMBL488444	44562987	313	-7	CHEMBL488444	experimental	Inhibition	Small molecular drug	Cc1cccc(N2C(=O)CSC2c2ccc(N(C)C)cc2)n1	SARS-CoV	ChEMBL		50
ISOPIMARIC ACID	442048	327	-7	CHEMBL512164	experimental	Inhibition	Small molecular drug	C=C[C@@]1(C)CC[C@H]2C(=CC[C@H]3[C@](C)(C(=O)O)CCC[C@]23C)C1	SARS-CoV	ChEMBL		28.9	283500
CHEMBL515912	25168713	329	-7	CHEMBL515912	experimental	Inhibition	Small molecular drug	O=C1CSC(c2ccc(F)cc2)N1c1ccccn1	SARS-CoV	ChEMBL		50
ALEXIDINE DIHYDROCHLORIDE	102678	347	-7	CHEMBL554041	experimental	Inhibition	Small molecular drug	CCCCC(CC)CNC(=N)NC(=N)NCCCCCCNC(=N)NC(=N)NCC(CC)CCCC.Cl.Cl	SARS-CoV	ChEMBL			17800
Compound 1 analog 10::ethyl (2E)-2-cyano-3-({4-[(4-{[(1E)-2-cyano-3-ethoxy-3-oxoprop-1-en-1-yl]amino}benzene)sulfonyl]phenyl}amino)prop-2-enoate	91593741	83	-6.9	19544	experimental	Inhibitor	Small molecular drug	CCOC(=O)C(C=Nc1ccc(cc1)S(=O)(=O)c1ccc(cc1)N=CC(C#N)C(=O)OCC)C#N	SARS-CoV	BindingDB			16000
1-(1,3-dimethyl-4-nitro-1H-pyrazol-5-yl)-3-(methylsulfanyl)-5-(thiophen-2-yl)-1H-pyrazole-4-carbonitrile::Compound 2 analog 20	4398304	92	-6.9	19554	experimental	Inhibitor	Small molecular drug	CSc1nn(c(-c2cccs2)c1C#N)-c1c(c(C)nn1C)[N+]([O-])=O	SARS-CoV	BindingDB			18000
Benzotriazole ester, 14	15959243	107	-6.9	111458	experimental	Inhibitor	Small molecular drug	CCN(CC)c1ccc(cc1)C(=O)Cn1nnc2ccccc12	SARS-CoV	BindingDB	1000
CHEMBL1392147	2986413	194	-6.9	CHEMBL1392147	experimental	Inhibition	Small molecular drug	CCOc1ccc(S(=O)(=O)NCc2ccc3c(c2)OCO3)cc1C	SARS-CoV	ChEMBL		50	76700
CHEMBL1732790	2911959	199	-6.9	CHEMBL1732790	experimental	Inhibition	Small molecular drug	OCCCc1nc2ccccc2n1CCOc1ccccc1	SARS-CoV	ChEMBL			74500
CHEMBL4214066	145966788	292	-6.9	CHEMBL4214066	experimental	Inhibition	Small molecular drug	CC(C)C[C@H](NC(=O)OC1CCN(C(=O)OC(C)(C)C)CC1)C(=O)N[C@H](C=O)C[C@@H]1CCNC1=O	Middle East respiratory syndrome-related coronavirus (isolate UnitedKingdom/H123990006/2012) (Betacoronavirus England 1) (Humancoronavirus EMC)	ChEMBL			600
CHEMBL519420	44563093	332	-6.9	CHEMBL519420	experimental	Inhibition	Small molecular drug	CC1SC(c2c(Cl)cccc2Cl)N(Cc2cccnc2)C1=O	SARS-CoV	ChEMBL		50
CHEMBL557291	45273179	352	-6.9	CHEMBL557291	experimental	Inhibition	Small molecular drug	CCN(CC)C(=O)CC[C@H](NC(=O)[C@@H](NC(=O)OCc1ccccc1)C(C)C)C(=O)c1nccs1	SARS-CoV	ChEMBL	614000
CHEMBL1478361	647122	195	-6.8	CHEMBL1478361	experimental	Inhibition	Small molecular drug	COc1ccc(N(CC(=O)NCc2ccco2)S(C)(=O)=O)cc1	SARS-CoV	ChEMBL			16100
CHEMBL3099532	22560824	243	-6.8	CHEMBL3099532	experimental	Inhibition	Small molecular drug	O=C1Nc2cc3c(cc2C1=O)CCC3	SARS-CoV	ChEMBL		79.36
CHEMBL3818000	15949840	272	-6.8	CHEMBL3818000	experimental	Inhibition	Small molecular drug	CC(=O)N[C@@H](CC(N)=O)C(=O)N[C@@H](CO)C(=O)N[C@H](C(=O)N[C@@H](CO)C(=O)N[C@@H](CCC(N)=O)C(=O)O)[C@@H](C)O	SARS-CoV	ChEMBL			7500
CHEMBL3818761	127052511	276	-6.8	CHEMBL3818761	experimental	Inhibition	Small molecular drug	CC(=O)N[C@@H](Cc1cnc[nH]1)C(=O)N[C@@H](CO)C(=O)N[C@H](C(=O)N[C@@H](CC(C)C)C(=O)N[C@@H](CCC(N)=O)C(=O)O)[C@@H](C)O	SARS-CoV	ChEMBL			50000
CHEMBL470324	44562941	300	-6.8	CHEMBL470324	experimental	Inhibition	Small molecular drug	CN(C)c1ccc(C2SCC(=O)N2c2ccccn2)cc1	SARS-CoV	ChEMBL		50
CHEMBL488259	6482978	311	-6.8	CHEMBL488259	experimental	Inhibition	Small molecular drug	O=C1CSC(c2c(Cl)cccc2Cl)N1Cc1ccco1	SARS-CoV	ChEMBL		50
CHEMBL537916	45269762	335	-6.8	CHEMBL537916	experimental	Inhibition	Small molecular drug	CCCN(CCC)C(=O)CC[C@H](NC(=O)[C@H](CC(C)C)NC(=O)[C@@H](NC(=O)[C@H](C)NC(=O)OCc1ccccc1)C(C)C)C(=O)C(F)(F)F	SARS-CoV	ChEMBL	297000
N-(4-chlorophenyl)-2-[(4-hydroxy-6-propylpyrimidin-2-yl)sulfanyl]acetamide::pyrimidine-containing compound 9	763192	57	-6.7	19517	experimental	Inhibitor	Small molecular drug	CCCc1cc(=O)[nH]c(SCC(=O)Nc2ccc(Cl)cc2)n1	SARS-CoV	BindingDB			30000
CHEMBL3818028	127048409	273	-6.7	CHEMBL3818028	experimental	Inhibition	Small molecular drug	CC(=O)N[C@@H](CC(N)=O)C(=O)N[C@@H](CO)C(=O)N[C@H](C(=O)N[C@@H](CC(=O)O)C(=O)N[C@@H](CCC(N)=O)C(=O)O)[C@@H](C)O	SARS-CoV	ChEMBL			20000
CHEMBL488445	44562988	314	-6.7	CHEMBL488445	experimental	Inhibition	Small molecular drug	O=C1CSC(c2c(Cl)cccc2Cl)N1Cc1cccnc1	SARS-CoV	ChEMBL		50
CHEMBL539209	45272306	338	-6.7	CHEMBL539209	experimental	Inhibition	Small molecular drug	CC(C)C[C@H](NC(=O)[C@@H](NC(=O)OCc1ccccc1)C(C)C)C(=O)N[C@@H](C[C@@H]1CCNC1=O)C(=O)c1nccs1	SARS-CoV	ChEMBL	2200
1,3-diethyl 2-[({4-[(4-{[3-ethoxy-2-(ethoxycarbonyl)-3-oxoprop-1-en-1-yl]amino}benzene)sulfonyl]phenyl}amino)methylidene]propanedioate::Compound 1 analog 14	91230600	87	-6.6	19548	experimental	Inhibitor	Small molecular drug	CCOC(=O)C(C=Nc1ccc(cc1)S(=O)(=O)c1ccc(cc1)N=CC(C(=O)OCC)C(=O)OCC)C(=O)OCC	SARS-CoV	BindingDB			32000
CHEMBL226658	4500012	216	-6.6	CHEMBL226658	experimental	Inhibition	Small molecular drug	O=C1Nc2cccc(Br)c2C1=O	SARS-CoV	ChEMBL		68.44
CHEMBL2316336	71571223	219	-6.6	CHEMBL2316336	experimental	Inhibition	Small molecular drug	CC(C)C[C@H](NC(=O)[C@@H](NC(=O)[C@H](C)NC(=O)[C@H](CO)NC(=O)[C@@H](NC(=O)OCc1ccccc1)[C@@H](C)O)C(C)C)C(=O)N[C@H](C#N)CCC(N)=O	SARS-CoV	ChEMBL			39000
5-IODOISATIN	88695	265	-6.6	CHEMBL325480	experimental	Inhibition	Small molecular drug	O=C1Nc2ccc(I)cc2C1=O	SARS-CoV	ChEMBL		86.73
	6889	162	-6.5	CHEMBL115897	experimental	Inhibition	Small molecular drug	O=C1Nc2ccc(Br)cc2C1=O	SARS-CoV	ChEMBL		90.54
CHEMBL3099531	39082878	242	-6.5	CHEMBL3099531	experimental	Inhibition	Small molecular drug	CC(=O)c1ccc2c(c1)C(=O)C(=O)N2	SARS-CoV	ChEMBL		95.37
CHEMBL397154	44433697	281	-6.5	CHEMBL397154	experimental	Inhibition	Small molecular drug	CCOC(=O)/C=C/[C@H](C[C@@H]1CCNC1=O)NC(=O)[C@H](CC(C)C)NC(=O)[C@@H](NC(=O)[C@H](CO)NC(=O)OC(C)(C)C)C(C)C	SARS-CoV	ChEMBL			10000
CHEMBL518906	25168714	331	-6.5	CHEMBL518906	experimental	Inhibition	Small molecular drug	CC1SC(c2c(Cl)cccc2Cl)N(Cc2ccco2)C1=O	SARS-CoV	ChEMBL		50
benzyl (2-oxopropyl)carbamate	22747857	1	-6.4	DB07293	experimental	inhibitor	Small molecular drug	CC(=O)CNC(=O)OCC1=CC=CC=C1	SARS-CoV	DrugBank
2-[(2-acetylbenzene)sulfonyl]benzoic acid::Compound 1 analog 12	4270495	85	-6.4	19546	experimental	Inhibitor	Small molecular drug	CC(=O)c1ccccc1S(=O)(=O)c1ccccc1C(O)=O	SARS-CoV	BindingDB			16000
5-NITROISATIN	4669250	165	-6.4	CHEMBL118305	experimental	Inhibition	Small molecular drug	O=C1Nc2ccc([N+](=O)[O-])cc2C1=O	SARS-CoV	ChEMBL		93.96
CHEMBL1876821	4788586	205	-6.4	CHEMBL1876821	experimental	Inhibition	Small molecular drug	CN(CC(=O)NC1CCCC1)S(=O)(=O)c1cccc(Cl)c1	SARS-CoV	ChEMBL			940
5-METHOXYISATIN	38333	213	-6.4	CHEMBL222660	experimental	Inhibition	Small molecular drug	COc1ccc2c(c1)C(=O)C(=O)N2	SARS-CoV	ChEMBL		95.32
CHEMBL3105074	9180583	262	-6.4	CHEMBL3105074	experimental	Inhibition	Small molecular drug	O=C(c1cncc(Br)c1)N1CCN(Cc2ccsc2)CC1	SARS-CoV	ChEMBL			10800
CHEMBL502385	44563094	323	-6.4	CHEMBL502385	experimental	Inhibition	Small molecular drug	O=C1CCSC(c2c(Cl)cccc2Cl)N1Cc1ccco1	SARS-CoV	ChEMBL		50
CHEMBL519424	25058768	333	-6.4	CHEMBL519424	experimental	Inhibition	Small molecular drug	O=C1CSC(c2c(Br)cccc2Br)N1Cc1cccs1	SARS-CoV	ChEMBL		50
CHEMBL208034	3265762	210	-6.3	CHEMBL208034	experimental	Inhibition	Small molecular drug	O=C1Nc2ccc(C(=O)O)cc2C1=O	SARS-CoV	ChEMBL		44.77
CHEMBL2316338	71571221	221	-6.3	CHEMBL2316338	experimental	Inhibition	Small molecular drug	CC(C)C[C@H](NC(=O)[C@@H](NC(=O)[C@H](C)NC(=O)OC(C)(C)C)C(C)C)C(=O)N[C@H](C#N)CCC(N)=O	SARS-CoV	ChEMBL			49000
CHEMBL327012	87203	266	-6.3	CHEMBL327012	experimental	Inhibition	Small molecular drug	O=C1Nc2ccc(Cl)cc2C1=O	SARS-CoV	ChEMBL		84.17
4-(5-chlorothiophen-2-yl)-2-[(thiophene-2-sulfonyl)methyl]-1,3-thiazole hydrobromide::Compound 2 analog 21	2809433	93	-6.2	19555	experimental	Inhibitor	Small molecular drug	Clc1ccc(s1)-c1csc(CS(=O)(=O)c2cccs2)n1	SARS-CoV	BindingDB			18000
5-FLUOROISATIN	236566	163	-6.2	CHEMBL116040	experimental	Inhibition	Small molecular drug	O=C1Nc2ccc(F)cc2C1=O	SARS-CoV	ChEMBL		82.55
CHEMBL3818593	127048410	275	-6.2	CHEMBL3818593	experimental	Inhibition	Small molecular drug	CC(=O)N[C@@H](CCC(=O)O)C(=O)N[C@@H](CO)C(=O)N[C@H](C(=O)N[C@@H](CC(C)C)C(=O)N[C@@H](CCC(N)=O)C(=O)O)[C@@H](C)O	SARS-CoV	ChEMBL			7500
CHEMBL1488602	2947583	197	-6.1	CHEMBL1488602	experimental	Inhibition	Small molecular drug	COCCOCCn1c(CCCO)nc2ccccc21	SARS-CoV	ChEMBL			25600
4-(DIMETHYLAMINO)BENZOIC ACID	12092	6	-5.7	DB08748	experimental	inhibitor	Small molecular drug	CN(C)C1=CC=C(C=C1)C(=O)O	SARS-CoV	DrugBank
CHEMBL221366	4004950	212	-5.6	CHEMBL221366	experimental	Inhibition	Small molecular drug	O=C(Oc1cccnc1)c1cccs1	SARS-CoV	ChEMBL			500
CHEMBL3105073	2806068	261	-5.4	CHEMBL3105073	experimental	Inhibition	Small molecular drug	S=C(NCc1cccnc1)SCc1cc(Cl)sc1Cl	SARS-CoV	ChEMBL		50	160
Pyrophosphate 2-/dihydrogen diphosphate; diphosphate(2-);	4995	14	-5.1	D0A1DU	Investigative	Inhibitor	Small molecular drug	OP(=O)([O-])OP(=O)(O)[O-]	Virus infection	TTD
PHLOROGLUCINOL	359	302	-5	CHEMBL473159	experimental	Inhibition	Small molecular drug	Oc1cc(O)cc(O)c1	SARS-CoV	ChEMBL			200000
2-(4,5-dihydro-1,3-thiazol-2-yl)-1-(1,3-thiazol-2-yl)ethan-1-one::Compound 2 analog 23	23644661	95	-4.9	19557	experimental	Inhibitor	Small molecular drug	O=C(CC1=NCCS1)c1nccs1	SARS-CoV	BindingDB			40000
ISIS 2922/Formivirsen sodium	16130321	13	NA	D0G1GP	Withdrawn from market		Antisense drug	CC1=CN(C(=O)NC1=O)C2CC(C(O2)COP(=S)(O)OC3CC(OC3COP(=S)(O)OC4CC(OC4COP(=S)(O)OC5CC(OC5COP(=S)(O)OC6CC(OC6COP(=S)(O)OC7CC(OC7COP(=S)(O)OC8CC(OC8COP(=S)(O)OC9CC(OC9COP(=S)(O)OC1CC(OC1COP(=S)(O)O)N1C=NC2=C1N=C(NC2=O)N)N1C=CC(=NC1=O)N)N1C=NC2=C1N=C(NC2=O)N)N1C=C(C(=O)NC1=O)C)N1C=C(C(=O)NC1=O)C)N1C=C(C(=O)NC1=O)C)N1C=NC2=C1N=C(NC2=O)N)N1C=CC(=NC1=O)N)OP(=S)(O)OCC1C(CC(O1)N1C=CC(=NC1=O)N)OP(=S)(O)OCC1C(…	Cytomegalovirus infection	TTD
Abbreviations: Drug Group: Approved, Vet approved, Nutraceutical, Illicit, Withdrawn, Investigational, Experimental；SARS-CoV: severe acute respiratory syndrome coronavirus; F-CoV: Feline coronavirus (strain FIPV WSU-79/1146); MERS-CoV: Middle East respiratory syndrome-related coronavirus; IC50: half maximal inhibitory concentration;
